# Supplementary material for: NusG is an intrinsic transcription termination factor that stimulates motility and coordinates gene expression with NusA
Source: eLife journal article supplement (doi:10.7554/elife.61880), 2021-04-09
Supplement: supp [file elife-61880-supp-v1.zip]

Archive with 25 entries (25 files):
- elife_poa_e61880_Transparent_Reporting_File.pdf
- elife_poa_e61880_Figure_1_figure_supplement_1.tif
- elife_poa_e61880_Figure_1_figure_supplement_2.tif
- elife_poa_e61880_Figure_1_figure_supplement_3.tif
- elife_poa_e61880_Figure_1_figure_supplement_4.tif
- elife_poa_e61880_Figure_1_figure_supplement_5.tif
- elife_poa_e61880_Figure_2_figure_supplement_1.tif
- elife_poa_e61880_Figure_4_figure_supplement_1.tif
- elife_poa_e61880_Figure_4_figure_supplement_2.tif
- elife_poa_e61880_Figure_4_figure_supplement_3.tif
- elife_poa_e61880_Figure_4_figure_supplement_4.tif
- elife_poa_e61880_Figure_4_figure_supplement_5.tif
- elife_poa_e61880_Figure_4_figure_supplement_6.tif
- elife_poa_e61880_Figure_7_figure_supplement_1.tif
- elife_poa_e61880_Figure_7_figure_supplement_2.tif
- elife_poa_e61880_Supplementary_file_1.xlsx
- elife_poa_e61880_Supplementary_file_2.xlsx
- elife_poa_e61880_Supplementary_file_3.xlsx
- elife_poa_e61880_Supplementary_file_4.xlsx
- elife_poa_e61880_Supplementary_file_5.xlsx
- elife_poa_e61880_Supplementary_file_6.xlsx
- elife_poa_e61880_Supplementary_file_7.xlsx
- elife_poa_e61880_Supplementary_file_8.xlsx
- elife_poa_e61880_Supplementary_file_9.xlsx
- elife_poa_e61880_Supplementary_file_10.xlsx
