# Supplementary material for: NusG is an intrinsic transcription termination factor that stimulates motility and coordinates gene expression with NusA
Source: eLife journal article supplement (doi:10.7554/elife.61880), 2021-04-09
Supplement: supp [file elife-61880-supp-v1.zip › elife_poa_e61880_Supplementary_file_1.xlsx]

## Sheet: wild-type
3' End	Strand	CV	3' end and upstream 50 nt	ΔG-51nt (kcal/mol)	%T	Relative Position
18	-	20.5	CACAGGGGTTGGTAATGTGAAAATGTTGTCGATAACCTCTGTGGATACTAA	-16.6	22.5	misc.
270	+	46.5	GATTGATTTCACACAGCTTGTGTAGAAGGTTGTCCACAAGTTGTGAAATTT	-15.6	0	misc.
341	+	11.38	CTATATTATATGTTTTCAACATTTAATGTGTACGAATGGTAAGCGCCATTT	-11.6	7.3	misc.
550	+	12.44	ACCAAAGCCCACTCACTGCAAGGCGATACATTAACAATCACGGCTCCCAAT	-2.7	3.65	dnaA_CDS
858	+	32	CCTCGCAGTAGCGGAAGCGCCCGCGAAAGCTTACAACCCTTTATTTATCTA	-8.7	0	dnaA_CDS
1192	+	11.31	ATTTCAAGTGACCGGCCGCCAAAGGAAATTCCGACACTTGAAGACAGATTG	-13.2	0	dnaA_CDS
1392	+	11.94	TATTCGGGAACTCGAAGGAGCATTAATCAGAGTTGTCGCTTATTCATCTTT	-8.1	0	dnaA_CDS
1839	+	377.31	TTCGGAAGTCATACACAGTCTGTCCACATGTGGATAGGCTGTGTTTCCTGT	-24.5	14.06	dnaA+89
1887	+	25.63	TGTCTTTTTCACAACTTATCCACAAATCCACAGGCCCTACTATTACTTCTA	0	7.48	dnaA+137
3112	+	1006.38	TCAGAACCTATTAATCCGATACACTGCTGCCGACCCGTCGGCAGCTTTTCT	-14.8	56.5	dnaN+37
4006	+	11.63	GACCGGACGATGCTCGATGTTCTGACCGATCAGCTTGTAGAAGTTGCAGCA	-9.5	0	recF_CDS
4343	+	35.44	GACAGCAGCGAACGACGGCGTTGTCCCTTAAGCTGGCGGAGATTGACCTGA	-12	19.33	recF_CDS
4488	+	16.13	CCAAGGCCGTGTACAAACGTTTGTCACAACGACAAGCGTTGATGGCATTGA	-20	0	recF_CDS
4771	+	38.63	TCGTAGTCACGGTTCAGAATATATATTACTCTCCCTTATCTTCCAGCACAT	-1.1	0	yaaB_CDS
5519	+	11.19	GGGCGTAAACATCACGATTGAAGATAAACGTGAAGGACAAGAGCGCAAAAA	-7.3	0	gyrB_CDS
6827	+	412.94	CATCTAATCATAAAAAGCCTTATTTCCAATAAGAAATAAGGCTTTTTTCTG	-17.6	32.59	gyrB+44
7718	+	62.13	GGGACGCAGCGGTATCCGGAAAGCATACGAATCAGGCCGAGGCTCTATCAC	-10.1	0	gyrA_CDS
8691	+	18.38	TCTACGTCAACTCATGACACGATTCTCTTCTTCTCGAACAAGGGGAAAGTG	-7.8	0	gyrA_CDS
9452	+	11.19	AGCTTTAGTTGAGAAAAACGAAGAAGATGAGAATGAAGAAGAACAAGAAGA	-2.4	84.51	gyrA_CDS
9494	+	399.5	ACAAGAAGAAGTGTGAAAAAAAGCGCAGCTGAAATAGCTGCGCTTTTTTGT	-21.2	100	gyrA+35
9671	+	426.75	ATGTTACTATTAAGTAGTCGCTTTGAGAGAAGCACACAAAGTTCTTTGAAA	-8.2	30.03	gyrA+212
9756	+	17.75	TTTATAAATCGCACAGCGATGTGCGTAGTCAGTCAAACTAGGGCCTGCACG	-12.1	7.26	gyrA+297
9783	+	62.38	GTCAGTCAAACTAGGGCCTGCACGACGCAGGTCACACAGGTGTCGCCGCAG	-16.5	36.3	gyrA+324
9812	+	138.25	GGTCACACAGGTGTCGCCGCAGGATGCGGTGAACTTAACCTGTGATCCATT	-23.4	40.79	gyrA+353
11430	+	245.13	ATATAAGACCTTGGGTCTTATAAACAGAACGTTCCCTGTCTTGTTTAGTTT	-13.6	0	gyrA+1971
11538	+	685.75	GCGCACGCCTGATAAGCGTGAGGTCGGTGGTTCGAGTCCACTCAGGCCCAC	-18.4	6.44	gyrA+2079
11628	+	5784.38	CCTGCTTTGCACGCAGGAGGTCAGCGGTTCGATCCCGCTAGGCTCCACCAA	-19.3	21.59	gyrA+2169
11674	+	28.75	ACCAACGTGTTCTTTGAAAACTAGATAACAGTAGACATCACATTCAATTAG	-2.3	25	gyrA+2215
11710	+	53.31	ATCACATTCAATTAGTAACACAAGATATCACATAGTGATTCTTTTTAACGG	-5	64.36	gyrA+2251
11871	+	15.31	TCCGAATGGGGAAACCCACCACTCGTAATGGAGTGGTATCCATATCTGAAT	-16.6	0	gyrA+2412
14634	+	18.19	AGTGTGGCGACACATGGAGCTGACAGATACTAATCGATCGAGGACTTAACC	-8.8	81.82	gyrA+5175
14807	+	20.31	CGCCGATGGTAGTCGGGGGTTTCCCCCTGTGAGAGTAGGACGCCGCCAAGC	-15.1	100	gyrA+5348
16127	+	27.19	ACAGAATCAGCAATGGCAATTGCAATGGCAAGACAGGGCGGCTTGGGCATC	-9.8	5.62	guaB_CDS
16455	+	15.25	CTGCATCTGTAGGAACTACTCTGGATGAAGCTGAAAAGATTTTGCAGAAAC	-9.1	0	guaB_CDS
16497	+	10.19	TGCAGAAACATAAAATTGAAAAGCTTCCTCTCGTAGATGACCAGAATAAAT	-1.2	1.33	guaB_CDS
16740	+	12.69	GCGTTTTAAACACAGTCACAAAAATCCGTGAAACGTATCCCGAATTAAACA	-5	0	guaB_CDS
16836	+	14.5	TCGAAGCTGGAGCAGACGTTGTCAAAGTTGGAATAGGGCCTGGTTCAATTT	-6.9	0	guaB_CDS
17368	+	13.75	TCGCGAAAGCCATCCGCATGACGTACAGATTACAAAAGAATCACCTAACTA	-3.2	29.14	guaB_CDS
17403	+	74.75	AAGAATCACCTAACTATACAATTTCATAATAAATTGTTACAAATTAAAAAC	-2.7	4.57	guaB+22
17435	+	1059.69	ATTGTTACAAATTAAAAACATTTGACAGGGTCTCTGACTCTGTCTATTTTT	-12.8	99.14	guaB+54
17715	+	11.38	TATGATCGAAGCTTCTTCAGGTAAAATTCTTTACAGTAAAAATGCAGATAA	-3.8	0	dacA_CDS
17744	+	23.5	TTTACAGTAAAAATGCAGATAAGAGACTGCCAATTGCGAGTATGACAAAAA	-6.9	3.58	dacA_CDS
17904	+	16.75	ATCAAACGTTCCTCTTCGGAAAGACGGGAAATACACAGTAAAAGAATTATA	-4.7	15.36	dacA_CDS
17931	+	41.81	GAAATACACAGTAAAAGAATTATATCAAGCTACAGCAATTTATTCTGCAAA	-2.2	0	dacA_CDS
17979	+	19.69	AAATGCTGCTGCTATTGCGATTGCAGAAATCGTTGCCGGTTCTGAAACTAA	-9.8	0	dacA_CDS
18131	+	56.63	AGCCTGAGGGGACAAGCGTAAATGAAGAAAGTGAAGTTTCTGCAAAGGATA	-7.5	1.6	dacA_CDS
18204	+	16.13	GATTACTGACTACCCTGAGATACTGGAGACTTCCAGTATCGCCAAAACGAA	-13.5	0.23	dacA_CDS
18223	+	57.75	ATACTGGAGACTTCCAGTATCGCCAAAACGAAATTCAGAGAAGGCACCGAT	-13.7	14	dacA_CDS
18437	+	24.81	TAAACGCAAAGGGCAACCTTCATACAGGCCGTTTCGATGAAACGAAAAAAA	-8.3	0	dacA_CDS
18543	+	11.38	TCAAGTAAAAGGCCATAAAACAATTTCAGTTGATAAGGGTAAAGAGAAAGA	-3	8.95	dacA_CDS
18907	+	670.75	TGGTTTTAATCAATTGAAAGAGCTCTGATGGATGTTAGGGCTCTTTCGCGT	-20	44.33	dacA+42
19656	+	15.94	TAATGACAGAAGCGAAAAACCTAGGTGCTCCTTACGAGCTTCTTCTTCAAA	-9	0	yaaD_CDS
20194	+	10.69	TCAATTCATGGAGCCGCTTCGTGAATTCGCTGCTCAGGGCAAACCGATGTT	-14.1	13.04	yaaE_CDS
20383	+	13.19	TAAAGGCTTGGACGAGCCTTTTACTGGGGTATTCATCCGTGCTCCGCATAT	-16.9	0	yaaE_CDS
20584	+	11.56	ATATAAGCAAAAGGCACTTGTATAAAACAGTTGAAAGCTGTGGAAACTTAT	-6.9	0	yaaE+26
20844	+	1280.94	GGTGGCAACGCGAGAGCTCTCGTCCCTTTATGGGGATGAGGGCTCTTTTTA	-31.4	33.52	yaaE+286
22197	+	582.19	TGAAACCGTAAATTATGGAAAGGCGTGCCTGACAAGGTGCGCCTTTTTGCT	-22.4	97.24	serS+40
22385	+	166342	CGACAGGGGTGTCAAAGCCCGCGGGGGTTCGAATCCCTCTTCCTCCGCCAT	-17.9	60.28	serS+228
22426	+	212.44	CCTCCGCCATATTGATTTTAATTCTAATGAAACACAAGCATATATTGGAGA	-6.8	65.06	serS+269
22464	+	7028.94	CATATATTGGAGATTGTTTTGTCCGTTGCATTCGGTGCGGCGGATTTTTTA	-14.9	98.1	serS+307
22470	-	134.13	TATTCATGATAATCAAAAAAAGTGAATCTCAGTCGAGATTCACTTTTTCTT	-17.8	86.67	dck+26
22508	+	85.69	TTTTTTATTTTAAAGAAAAAGTGAATCTCGACTGAGATTCACTTTTTTTGA	-19.7	47.62	serS+351
26194	+	11.94	TGGTTTTTGGCGCATTTGATCCGAAAGGCGGCTGTTCAGGCACGCTAATGA	-11.3	0	tadA_CDS
26526	+	214.13	CGAATCCCTTCTCGAGGTTCGTTTACTTTAAGGCCTGCCTTAAGTAAGTGG	-13.3	0	tadA+189
26687	+	18995.1	AACTGCTTAAGTAACGCTTAGGGTAGCGAATCGACAGAAGGTGCACGGTAA	-8.1	91.79	tadA+350
26735	+	629.25	TAAATCAATCATCAAATTTTCAGACTCACCTAATATTAGGTGAGTTTTTTG	-14.6	75.5	tadA+398
27081	+	10.94	GCAACGAATGTGCGGCCTGTAAAGGGATAACAAACGGGTCAATATCCGATG	-10.6	8.23	dnaX_CDS
27176	+	24.25	CGTGACATTCGCGATAAAGTGAAGTTTGCCCCATCGGCCGTCACATATAAG	-13.3	0	dnaX_CDS
27266	+	14.94	GCTTTTAATGCATTACTAAAAACATTAGAAGAGCCGCCTGAGCATTGTATT	-7	0	dnaX_CDS
28909	+	11.31	AAAAGAACATGCAATATCCTGAACCAATATCAAAGCTGATTGACAGCTTTA	-7.2	0	recR_CDS
28959	+	508.94	ATGAAATTGCCAGGGATCGGACCGAAAACAGCGGTTCGTCTGGCTTTTTTT	-20.1	39.46	recR_CDS
29910	+	23.44	TTGGCATCACAGCTGTTAAATTTGTGGCAGGTGCTTTGCTGCTGGTTTGTG	-12.4	27.27	bofA_CDS
30163	+	13.56	AAGAAAATGCTAAAAAGTTGTTGACAGTAGCGGCGGTAAATGTTATGATAA	-4.9	3	bofA+128
30203	+	867.06	TGTTATGATAATAAAGTCGCTTAAACGAGCGGTAAACAAAGTTCTTTGAAA	-6.2	63.23	bofA+168
31898	+	268.81	ATATAAGACCTTGGGTCTTATAAACAGAACGTTCCCTGTCTTGTTTAGTTT	-13.6	7.14	bofA+1863
32006	+	639.19	GCGCACGCCTGATAAGCGTGAGGTCGGTGGTTCGAGTCCACTCAGGCCCAC	-18.4	6.43	bofA+1971
32096	+	5939.63	CCTGCTTTGCACGCAGGAGGTCAGCGGTTCGATCCCGCTAGGCTCCACCAA	-19.3	21.44	bofA+2061
32143	+	32.13	CCAACGTGTTCTTTGAAAACTAGATAACAGTAGACATCACATTCAATTAGT	-2.3	23.49	bofA+2108
32178	+	60.88	ATCACATTCAATTAGTAACACAAGATATCACATAGTGATTCTTTTTAACGG	-5	62.16	bofA+2143
35236	+	2384.38	GCTCTCACATCCTGTGAGAAACGCCCAGTACCTTCATCCTGAAGGCATTTG	-14.4	99	bofA+5201
35745	+	111	GAGCATTCATACACCGCCATTATATTCATAGACCTGAAAAGGTCTTTTTTT	-8	82.54	csfB+20
37816	+	63.5	ATTCTCATTCATTTCATGTTCCGGGACATCACAATGGAGATGTCTTTTTTG	-8.9	3.22	yaaO_CDS
39321	+	18	GAGAGCCAGGCGGAATAGATATTGCAGAACAAATTAGAGAGGTTATTCTGA	-4.2	2.67	tmk_CDS
40853	+	24.25	CTGCTTCTTGCAAAAAGCTTCTTTTGTCTGGAGGGTGGCGCGGAGCCTTGT	-12.6	0	holB_CDS
41703	+	14.81	AAGCTTGTACAATGTAATTGGTGTCCGCTTTAAGAAAGCGGGTAAAATATA	-9.8	0	yaaT_CDS
42856	+	16.75	GTGTTCGAAAAGAGGATTGTCTTTTCTGTCTGTCATTCTTAAATAAAAAAT	-6.7	41.5	yabA_CDS
42896	+	635.38	AAATAAAAAATAGGGAAAAGGCTTCCGCATAAGACGGGAGCCTTTTTCAAA	-21.7	48.19	yabA+38
44797	-	919.75	TCATTTCTTGTACAAAAAACGTTCTTGTTATGACACAAGAACGTTTTTTTA	-16.7	99.42	abrB+51
44829	+	63	GCTTACCATATTAAGCAATAAAAAAACGTTCTTGTGTCATAACAAGAACGT	-17.5	48.15	yabC+30
44849	-	27.81	CGCTGAGCAAATCATCAGCGAAATCCAAAACCAGCTTCAAAACCTTAAATA	-9.2	33.94	abrB_CDS
45037	-	10.38	GTAGTTATTCCTATCGAACTGCGTCGTACTCTTGGAATCGCAGAAAAAGAT	-6.2	17.58	abrB_CDS
45041	-	10.88	ACGTGTAGTTATTCCTATCGAACTGCGTCGTACTCTTGGAATCGCAGAAAA	-8.1	3.86	abrB_CDS
47679	+	666.88	GATAAACAAAAGGTGTTTCACGTGTAACAATTCGTCGAACACCTTTTGTGT	-20	50.5	metS+52
48707	+	71.94	GCCTTTTAGATACTCTATATAATCTCTCCGAGGAGAAGGAGGCGTTTTTCA	-10.4	8.46	yabE_CDS
49236	+	49.63	GAATGATGCAGGGAAACAAAAGAAGATCTGGACGACTTCGACTACGGTCGC	-6.1	5.37	yabE_CDS
49358	+	95.19	TGACGAAAGGAAAGGCTGATATTACAATTACTCGTATCGAAAAGGTCACCG	-4.6	11.32	yabE_CDS
49457	-	39.38	GGACACTTCTTTACCGTTTTCTTTAACGACTTCGAAATGTTTTTTTAGCTT	-5.7	6.9	gerD+109058
49519	-	10.94	GTGCCGACAGCAATCACTTTATCTTTGCTTTGTTCAGCTGTTTCTTCTTTT	-5.2	2.68	gerD+108996
49564	+	10.88	CTTGTAAAAGAAGAAACAGCTGAACAAAGCAAAGATAAAGTGATTGCTGTC	-5	0	yabE_CDS
49678	-	48.25	ACGCCTGTCGCTGTATGTCCTGAACAACCGCTGCAGCTTGCCGTATAAGCC	-9	13.83	gerD+108837
49748	-	30.25	TTTGGAGCCTAGCGGAATGACATTTGGATCCACAGCGATGACTTTGGCATT	-6.2	13.35	gerD+108767
49987	+	350	AATTAGTATATACTTATGTATTCAGAGGGTTTTGCGCCCTCTGTTTTTTTC	-15.8	87.66	yabE+45
51532	+	233.25	AGCGCTGTCTAACGGATTGTATAAAGCCCTTTTCTAAAAGGGCTTTTTGTT	-14.1	88.8	ksgA+14
52900	+	264.63	AAAACGATTGAGCGTTCGGGCATTTTAGCTGAGACGTACCCTTCTGTTTTT	-10.2	8.57	veg_CDS
53057	+	851	GCTCAGTGGCATTTTAACGGGCAGTGAACCTTTTGTTTACTGCTTTTTGTT	-14.6	88.55	veg+34
53408	+	30.31	ATAACCGATAAGGATGTGACCCGGGGGACGTGCTGTTCCCTGGTTTTTTTA	-17.2	90.48	sspF+40
55370	+	12.06	ATGCCCCAGCGGCAATCGGGCCTTATTCACAAGGGATTATCGTCAACAATA	-7.6	0	yabJ_CDS
55713	+	823.31	GGTGAAATAATAAGAAAAGTGATTCTGGGAGAGCCGGGATCACTTTTTTAT	-21.1	82.74	yabJ+41
56226	+	462.19	AAGGACTGCTGAAAGGGCTGACATAAGCCTTTTGCCGGCGGTCCTTTTTTA	-27	95.79	spoVG+67
57010	+	10.69	AGAGATTCTTAAAAATGAAGGCGAAACTGTTGCCGCTTACCAGACTGGTAA	-9.6	0	glmU_CDS
57692	+	11.13	GTACCTGGAAAAGCACTTGCTATTGCCAGAGCGAGACAAGTAAATAAAGAC	-8.5	14.93	glmU_CDS
57695	+	11.13	CCTGGAAAAGCACTTGCTATTGCCAGAGCGAGACAAGTAAATAAAGACGAT	-8.5	14.42	glmU_CDS
58177	+	28.19	CTCGTGTGATTGCACTTGACCTGCATGCGCCGCAAATTCAAGGATTCTTTG	-9.5	0	prs_CDS
58180	+	28.5	GTGTGATTGCACTTGACCTGCATGCGCCGCAAATTCAAGGATTCTTTGATA	-12.1	7.87	prs_CDS
58867	+	10.56	TTACTCGTTCGTCTCTTCGGAATATCCGTACTTCAGGACATGTTCCAGGTA	-9.4	0	ctc_CDS
59045	+	11.5	CATGGTAACAGACCTGCAGACGGACCCGCTGAAAAATGAAATCACTCATGC	-7.5	0	ctc_CDS
59231	+	27.44	AAAAGCCATTCCGCAAACGATTGAGGCTGATATTTCAAGCCTCGATGTAAA	-15.6	0	ctc_CDS
59438	+	2334.5	CGAACAATAATAGCTTAAGGCGTAACCCTCCCGCGGTTACGTCTTTTGTGC	-16.8	75.01	ctc+41
60398	+	219	ATTTATTCAATAAAAAGCTTTGGTGTAGACACTAGACCAAAGCGTTTTTCT	-15.5	9.69	yabK+38
64702	+	30.19	CGAAAATAGGTATGTAAAGAACAGCTCTCCTTGGGACGCTGTTCTTTTTCA	-15.9	53.73	spoVT+67
70027	+	81.38	TCAAAACGTGGAGGGCGCGGAGCAAGAAGAGGATAACTTGCTGCTTTCTAT	-14.4	5.04	yabR+15
70070	+	4047.56	CTTTCTATAAAATAAATGAAGCATCCGTTCATCCCGACGGATGCTTTTTTA	-17.2	98.12	yabR+58
70257	+	12590.9	GTACGGTTCATACCCGTGAGGTCGGGGGTTCGATCCCCTCCGCCGCTACCA	-18.2	11.46	yabR+245
70339	+	169.69	GACACCGCCCTTTCACGGCGGTAACACGGGTTCGAATCCCGTACGGGTCAT	-17.2	20.07	yabR+327
70380	+	2465.31	TACGGGTCATCCTAACAAATCGGTTTCTCTTGCAGAAGCCGATTTTTTTCA	-17.1	92.23	yabR+368
74064	+	31.63	TCTTGAAATCTTTCTCAAAGGCCCAGTCCGTTACGATGGGGCCTTCTTTTT	-15.7	22.58	yabT_CDS
75992	+	15.5	ATACCAAATTAGCGGAGCTGCTGATGAAACGGCAGTGCTCCCTAATGGATA	-19.1	0	tilS_CDS
76157	+	13.38	AGACCGGATCAAACTAAAAGGGATGAACGGCTCAAAAAAGGTAAAGGATAT	-7.7	17.6	tilS_CDS
76917	+	13.75	CGGCAGTTTATGAAAGCTGATCGGCAGCCTGCTTCCGAGATGGTTATTGTT	-10.6	0	hprT+31
76923	+	11.38	TTTATGAAAGCTGATCGGCAGCCTGCTTCCGAGATGGTTATTGTTTGTATT	-7.3	1.28	hprT+37
76937	+	11.13	TCGGCAGCCTGCTTCCGAGATGGTTATTGTTTGTATTGGAATGATTTTCTA	-8	0.24	hprT+51
77018	+	17.31	TGGGAGGAGGTAAGGAATGAATCGGGTCTTCCGTAATACCATTTTTTATTT	-11	0	ftsH_CDS
77086	+	33.19	TAATCGGGGTTGTGAGCTACTTCCAGACCTCAAATCCGAAAACAGAAAATA	-8.4	0	ftsH_CDS
77160	+	26	AACCTGGATGACGGGAAAGTTGATAGCGTATCGGTTCAGCCTGTCAGAGGT	-15.1	0	ftsH_CDS
77258	+	36.69	CTTTTTGACTCATGTTCCTGAAGGAAAGGGAGCAGACCAGATATTTAACGC	-10.4	5.84	ftsH_CDS
77295	+	30.81	CAGATATTTAACGCTTTGAAAAAGACAGACGTAAAGGTTGAGCCCGCGCAA	-4.2	0	ftsH_CDS
77461	+	32.06	TTGGCAAGAGTAAAGCGAAGCTGTATACAGAGGAAAAGAAACGCGTCAAAT	-3.8	1.7	ftsH_CDS
77501	+	87.19	ACGCGTCAAATTTAAAGACGTTGCAGGGGCTGACGAAGAAAAGCAAGAACT	-7.2	0.45	ftsH_CDS
77664	+	58.06	GCCAAGGCTTGTGCAGGAGAAGCCGGCGTACCTTTCTTCAGCATCAGCGGA	-15.6	6.91	ftsH_CDS
77666	+	58.31	CAAGGCTTGTGCAGGAGAAGCCGGCGTACCTTTCTTCAGCATCAGCGGATC	-15.6	5.67	ftsH_CDS
77726	+	43.5	TGAAATGTTTGTAGGGGTCGGTGCTTCCCGTGTGCGTGACTTGTTTGAAAA	-9.6	7.01	ftsH_CDS
77760	+	42.19	CGTGACTTGTTTGAAAATGCGAAAAAGAATGCGCCTTGTTTGATCTTCATT	-3.7	0	ftsH_CDS
77762	+	42.31	TGACTTGTTTGAAAATGCGAAAAAGAATGCGCCTTGTTTGATCTTCATTGA	-3.7	0	ftsH_CDS
77978	+	176.25	CTTACTTCGTCCGGGACGTTTTGACCGTCAAATCACAGTGGACCGCCCAGA	-8.3	9.76	ftsH_CDS
78142	+	70	TAGAAAACCTCTTGAATGAAGCTGCGCTTGTAGCGGCTCGTCAAAACAAGA	-13.2	0	ftsH_CDS
78224	+	42.25	GACGGACCGTGTAATTGCCGGACCCGCTAAGAAGAGCCGCGTTATCTCCAA	-8.8	0	ftsH_CDS
78298	+	20.13	ATCACGAAGGCGGACACACCGTTATCGGTCTCGTTTTAGATGAGGCAGATA	-17	0	ftsH_CDS
78344	+	28.88	AGATATGGTTCATAAAGTAACGATTGTTCCTCGGGGCCAGGCTGGCGGTTA	-7.4	0	ftsH_CDS
78430	+	33.75	AAACAAAGCCGGAGCTGCTTGATAAAATTGTCGGCCTCTTGGGCGGACGTG	-15.2	0	ftsH_CDS
78478	+	26.56	GTGTTGCTGAAGAGATTATCTTCGGTGAAGTCAGCACAGGGGCGCACAATG	-13.6	0	ftsH_CDS
78488	+	25.81	AGAGATTATCTTCGGTGAAGTCAGCACAGGGGCGCACAATGACTTCCAGCG	-12.1	0	ftsH_CDS
78499	+	30.75	TCGGTGAAGTCAGCACAGGGGCGCACAATGACTTCCAGCGTGCGACGAATA	-11.5	2.55	ftsH_CDS
78620	+	10.75	GGGCGGTCAGGTATTCTTAGGCCGTGATTTCAACAACGAACAGAACTACAG	-9.5	0	ftsH_CDS
78669	+	101.94	AGTGATCAAATCGCTTACGAAATTGATCAGGAAATTCAGCGCATCATCAAA	-7.9	0	ftsH_CDS
78902	+	18.69	CATTCTGACAAAAACAGAAGAAAAGAAAGACGATACGAAAGAGTAATTCGC	-5.4	1.05	ftsH+5
78911	+	20.25	AAAAACAGAAGAAAAGAAAGACGATACGAAAGAGTAATTCGCTTTCTTTCT	-12.5	0.97	ftsH+14
78914	+	19.88	AACAGAAGAAAAGAAAGACGATACGAAAGAGTAATTCGCTTTCTTTCTAAA	-13.2	3.57	ftsH+17
78946	+	2321.75	AATTCGCTTTCTTTCTAAAAAAACTGCCGGCTGACGCTGGCAGTTTTTTTA	-22.1	92.25	ftsH+49
80774	+	280.5	TGGAAGGGCTTCGTGACCAAACTACCCGCTAAGCTCTTTAGCGGGTTTTTA	-15.5	14.66	hslO+19
82064	+	11.63	ATGGTTGCTGCTGCTAAAGGATTAAAAGCCATTTTGGTTATGCCTGATACA	-7.6	21.18	cysK_CDS
82701	+	24.69	GTAACGGCGAACGTTATCTAAGCACGCCGCTGTACCAATTCGATTAAAAAA	-8.4	55.12	cysK+4
82735	+	613.56	CCAATTCGATTAAAAAAAGCCAAAACTCCCGGTTCGCCGGGAGTTTTTTTA	-17.3	98.61	cysK+38
84935	+	54.56	GAACGGCCGGTATATGGAGGAGAAAGATGCAGTTCTTTCTCCTTTTGACCA	-20.2	13.38	pabC_CDS
86698	+	47.94	AAAACAAACTTGGCCAGCGGTTTAAAGTCGATTTAACCGCTGAGCTGGATT	-17.5	0.95	folB_CDS
86866	+	11.75	AACGTATTGCTGGCACTGTTCTCGGAAAATTTCAGCCTGTTCAGCAATGTA	-11.1	0	folB_CDS
87570	+	152.44	CGGAAACCGATTGCCGTCTGCTGCCATCATTCAAGATGCAGCAGATGTTTT	-22	2.69	yazB_CDS
88687	+	93.56	ACTCACCTCTATTTGCTGCTCACTGCTAGTTTTACGCTGGCAGTTTTTCTG	-12	1.55	dusB+52
88841	+	10.06	TGAATCAGCTGAGAGATAACGGCATCGATCCATTCGGCGCACGTTTTGAAA	-10.5	0	lysS_CDS
89044	+	10.69	GGCCAAATCCAAATCTACGTAAGAAAAGACAGTGTCGGTGACGACCAATAT	-4.8	0	lysS_CDS
89375	+	11	TAGAAGTAGAAACACCTACAATGCACAGCATTCCTGGGGGAGCTTCTGCAC	-12.2	0	lysS_CDS
90211	+	810.25	ATGCTGCTGACGAATGCCCCTTCTATTCGCGATGTGCTGTTATTCCCGCAA	-5.4	13.23	lysS_CDS
90274	+	237.75	TAATAAAAAAGAGCGGTATCCTCCATAGGGAAAGGATGCCGCTCTTTTTAA	-28.3	98.13	lysS+48
90459	+	1037.63	AGTTATAATAATAAAGTCGCTTGAACGAAGTGAACAAAATGATCTTTGAAA	-6.9	66.29	lysS+233
90510	+	10.25	ACTAAACAAGACAAAACGTACCTGTTAATTCAGTTTTTAAAAATCGCACAG	-1.4	11.11	lysS+284
90516	+	10.63	CAAGACAAAACGTACCTGTTAATTCAGTTTTTAAAAATCGCACAGCGATGT	-5.9	2.7	lysS+290
92155	+	293.13	ATATAAGACCTTGGGTCTTATAAACAGAACGTTCCCTGTCTTGTTTAGTTT	-13.6	87.5	lysS+1929
92255	+	33.81	GACATCACATTCAAGTAATACAAGATATCACATAGTGATTCTTTTTAACGG	-5	41.86	lysS+2029
95179	+	14.56	AGTGTGGCGACACATGGAGCTGACAGATACTAATCGATCGAGGACTTAACC	-8.8	100	lysS+4953
95351	+	14.75	GCGCCGATGGTAGTCGGGGGTTTCCCCCTGTGAGAGTAGGACGCCGCCAAG	-16.2	0	lysS+5125
95448	+	1303.81	GCATCTGCCTTACAAGCAGAGGGTCGGCGGTTCGAGCCCGTCATCCTCCAC	-16.1	2.76	lysS+5222
95531	+	4534.13	ACTGACTTGTAATCAGTAGGTTGGGGGTTCAAGTCCTCTTGCCGGCACCAC	-14.9	1.61	lysS+5305
95566	+	128.38	CTCTTGCCGGCACCACTTTTATATGATATAATACTCAAGTCTCTTGTAGAA	-2.4	0	lysS+5340
95642	+	552.31	ATCTGACTTTTAATCAGAGGGTCGAAGGTTCGAGTCCTTCATGGCTCACCA	-14.2	0	lysS+5416
95732	+	1678.63	TTAGGATCTAGTGTCTTTATGACGTGGGGGTTCAAGTCCCTTCACCCGCAT	-11.5	1.73	lysS+5506
95847	+	5538.69	CCACCTTGCCAAGGTGGGGGTCGCGGGTTCGAATCCCGTCTTCCGCTCCAA	-20.1	4.61	lysS+5621
95951	+	2009.94	CCTGCGGTAGGTGACTACCGTGCCGGTTCAAGTCCGGCCCTCGGCATTATG	-19.8	25.34	lysS+5725
96033	+	558.44	TTTGACTACGGATCAAAAGGTTAGGGGTTCGACTCCTCTCGGGCGCGCCAT	-9.9	2.13	lysS+5807
96132	+	209.69	GAGCACATGGTTTGGGACCATGGGGTCGCAGGTTCGAATCCTGTCTTCCCG	-18.7	0	lysS+5906
96222	+	6690.88	CCTGCTTTGCACGCAGGAGGTCAGCGGTTCGATCCCGCTAGGCTCCACCAA	-19.3	28.86	lysS+5996
96316	+	798	TACTAATAAAGTTGCTTTAACAAAGCGGACAAACAAAATGATCTTTGAAAA	-4.7	41.17	lysS+6090
96340	+	75.69	GCGGACAAACAAAATGATCTTTGAAAACTAAACAAGACAAAACGTACCTGT	-0.3	53.42	lysS+6114
96366	+	60.63	ACTAAACAAGACAAAACGTACCTGTTAATTCAGTTTTTAAAAATCGCACAG	-1.4	34.42	lysS+6140
96403	+	37.5	TAAAAATCGCACAGCGATGTGCGTAGTCAGTCAAACTACTTTATCGGAGAG	-10.4	61.64	lysS+6177
98011	+	266.94	ATATAAGACCTTGGGTCTTATAAACAGAACGTTCCCTGTCTTGTTTAGTTT	-13.6	58.82	lysS+7785
98111	+	32	GACATCACATTCAAGTAATACAAGATATCACATAGTGATTCTTTTTAACGG	-5	27.27	lysS+7885
101035	+	13.5	AGTGTGGCGACACATGGAGCTGACAGATACTAATCGATCGAGGACTTAACC	-8.8	83.33	lysS+10809
101209	+	13.13	GCCGATGGTAGTCGGGGGTTTCCCCCTGTGAGAGTAGGACGCCGCCAAGCA	-15.1	0	lysS+10983
106057	+	401.25	TAGAAGACGGAAATGAGGCATACAGCATGTAAGTGTATGCCTCACTTTCAT	-20.3	65.98	clpC+53
106921	+	21.94	GATCTACAAACGAAATGGGCATTTTCGAAATGCGGGAAGAGGGGCTCACTG	-7.4	29.97	radA_CDS
110285	+	97.44	GATTGAACGTTCAAGCTTGTGGGCTGTCCAAACGCCACAAGCTTTTCGTCT	-16.5	10.05	ispD_CDS
111669	+	20.25	CGGAACGCCTACTTATAACTTCGCGGTAGCTATTGATGACTACTTAATGAA	-3.8	10.21	gltX_CDS
112379	+	13.44	ATATCAAAGCATCGATCAAAGCAGTGCAGAAAGAAACTGGCCATAAAGGGA	-4.3	1.13	gltX_CDS
112759	+	556.13	CGCGCGGTTAAAGCGTCTCTGTCATGTTTACATGCAGAGACGCTTTTTTTA	-23.4	51.06	gltX+261
114967	+	22.94	GGTGATGCCATTTTTGAAGTGTATGTCAGGCATCACCTGCTTAAGCAGGGC	-17.7	0	mrnC_CDS
116252	+	25.25	CTTGAGAAAAAACAGACCAACCATAGAGTTGAAGTAATTTTTACAAAAGAA	-2.8	0	yacP_CDS
117779	+	899.19	TATAATAGATCATAATATTACTTGCCAAAACCCGTTCAGCGGGTTTTTTAT	-11	14.93	secE+68
118057	+	12.31	GTACCCGAAGAAGAAGAAACGGATATCAAAAACGGCAAGAAAAAAGTCGTG	-5.9	0	nusG_CDS
118575	+	229.56	AGAATGAAACCTTGAGTGGGAGGGTTTACCCTATTACCACATCACGGACTT	-13.3	5.23	nusG+152
118618	+	137.5	ACGGACTTAAGGAGGTGTGTCTCGTGGCTAAAAAAGTAGTTAAAGTTGTAA	-6.9	0	rplK_CDS
118640	+	39.94	CGTGGCTAAAAAAGTAGTTAAAGTTGTAAAATTGCAAATTCCTGCTGGAAA	-9.1	0	rplK_CDS
118696	+	134.06	ACCCAGCACCACCAGTTGGACCTGCACTTGGTCAAGCCGGTGTTAACATCA	-14	21.58	rplK_CDS
118753	+	176.31	TCTGTAAGGAGTTTAACGCTCGTACAGCTGACCAAGCTGGTTTAATCATTC	-10.7	1.57	rplK_CDS
118794	+	56.63	TTAATCATTCCTGTTGAAATTTCGGTTTACGAAGACCGTTCATTTACATTT	-6.7	0	rplK_CDS
118822	+	93.5	ACGAAGACCGTTCATTTACATTTATTACAAAAACTCCACCTGCTGCAGTAT	-0.6	0	rplK_CDS
118902	+	26.94	GGTTCTGGTGAACCAAACCGTAATAAAGTGGCAACCGTTAAGCGCGATAAA	-8.6	2.64	rplK_CDS
119014	+	267.25	TGCGCATGGTTGAAGGTACTGCCCGCAGTATGGGTATTGTAATCGAGGATT	-8.7	37.46	rplK_CDS
119017	+	266.38	GCATGGTTGAAGGTACTGCCCGCAGTATGGGTATTGTAATCGAGGATTAAT	-9.4	2	rplK+1
119065	+	2400.81	AATTTGTTTCTTGTCGGGTTGCGAGTTTTAACAAGTTCGCAACCCTTATTC	-16.7	3.99	rplK+49
119104	+	202.63	CAACCCTTATTCGTGGGAGGTTATTCCGCTATAACCACATAAGGAGGAAAT	-11.2	17.63	rplK+88
119161	+	49.94	ATGGCTAAAAAAGGTAAAAAGTACGTTGAAGCTGCTAAGCTTGTAGACCGT	-8.6	0	rplA_CDS
119209	+	15.69	CGTTCTAAAGCTTACGACGTCTCTGAAGCAGTAGCTCTCGTTAAAAAAACA	-4.2	2.44	rplA_CDS
119317	+	61.5	CGTAAAAACGACCAGCAAATCCGTGGAGCAGTTGTGCTTCCAAACGGAACT	-13.4	0	rplA_CDS
119421	+	77.19	TGAAGCTGCTGGTGCAGATTTCGTAGGCGATACTGACTACATCAACAAAAT	-10.7	4.89	rplA_CDS
119446	+	15.19	GGCGATACTGACTACATCAACAAAATTCAACAAGGCTGGTTCGATTTCGAT	-2.3	0	rplA_CDS
119468	+	38.56	AAATTCAACAAGGCTGGTTCGATTTCGATGTTATCGTAGCTACACCTGACA	-8.2	0.68	rplA_CDS
119563	+	10.75	GGTTTAATGCCGAACCCTAAAACTGGTACAGTTACTTTCGAAGTTGAAAAA	-7.3	0	rplA_CDS
119621	+	66.81	GCGAAATCAAAGCTGGTAAAGTTGAATACCGCGTTGATAAAGCTGGAAACA	-11.8	0	rplA_CDS
119762	+	125.56	CTGCTGCAGCTAAAGGCGTTTACGTGAAAAACGTTGCTGTAACTTCTACTA	-11.4	12.12	rplA_CDS
119811	+	107.63	TATGGGACCTGGTGTCAAAGTAGACTCTTCAACTTTTAACGTAAAATAATA	-3.8	21.1	rplA+2
119946	+	64.44	GCTTAATTATCCTACCGAGGTGTATATTATCACAGCTATTACGTTACGTAT	-3.2	0	rplA+137
119950	+	61	AATTATCCTACCGAGGTGTATATTATCACAGCTATTACGTTACGTATGCTT	-4.2	0	rplA+141
119986	+	13054.8	ACGTTACGTATGCTTGTATATACAGCCTCCATGTCTCATGGAGGCTTTTTA	-18.4	4.22	rplA+177
120039	+	335.13	TGGAATCCGTCGTCTCAGTCGTGATCACCTAACGGTATAAGTGTTACACAA	-4.4	1.31	rplA+230
120114	+	53.75	AGCAGCGCAATTGAAACAAAAAAAGTTGTTGTTGAAGAAATTGCTTCTAAA	-8.8	0	rplJ_CDS
120223	+	98.88	TAACTGAACTTCGTAAACAGCTTCGCGAAGCTAACGTTGAGTTCAAAGTTT	-10.7	0	rplJ_CDS
120258	+	52.19	GTTGAGTTCAAAGTTTACAAAAATACGATGACTCGCCGTGCGGTTGAACAA	-6.6	12.13	rplJ_CDS
120269	+	76.56	AGTTTACAAAAATACGATGACTCGCCGTGCGGTTGAACAAGCTGAGCTTAA	-5.9	7.64	rplJ_CDS
120315	+	112.44	CTTAATGGTTTGAATGATTTCTTAACTGGACCGAACGCGATCGCATTCAGC	-5.3	10.66	rplJ_CDS
120382	+	52.63	CTCCGGCTAAAGTTCTTAATGACTTCGCTAAAAATCACGAAGCTCTTGAAA	-5.3	0	rplJ_CDS
120407	+	48.31	CGCTAAAAATCACGAAGCTCTTGAAATCAAAGCTGGCGTTATCGAAGGTAA	-7.3	17.5	rplJ_CDS
120473	+	63.38	AGAAGTGAAAGCTCTTGCTGAACTTCCATCACGCGAAGGCTTGCTTTCTAT	-13.1	0	rplJ_CDS
120524	+	77.5	GTTGCTTAGCGTACTTCAAGCTCCAGTTCGCAACCTTGCTCTTGCTGCAAA	-9.3	0	rplJ_CDS
120569	+	121.81	TGCAAAAGCTGTGGCAGAACAAAAGGAAGAACAAGGCGCTTAATCTAATCA	-2.8	0	rplJ+8
120585	+	170	GAACAAAAGGAAGAACAAGGCGCTTAATCTAATCAGTTTTTCATAAATTAA	-4.3	0	rplJ+24
120606	+	46.75	GCTTAATCTAATCAGTTTTTCATAAATTAAAACAAAATGGAGGAATTACAA	-2.5	20.02	rplJ+45
120664	+	47.56	TAAATATCGAAGAAATCATTGCTTCCGTTAAAGAAGCAACTGTACTTGAAT	-7.7	12.76	rplL_CDS
120704	+	22.31	TGTACTTGAATTGAACGACCTAGTAAAAGCAATCGAAGAAGAATTTGGCGT	-2.4	26.4	rplL_CDS
120738	+	27.31	GAAGAAGAATTTGGCGTAACTGCTGCTGCTCCTGTAGCTGTAGCTGGCGGA	-14.8	0	rplL_CDS
120789	+	31.31	GCTGCTGCTGGCGGAGCTGCTGAAGAGCAAAGCGAATTCGATCTTATCCTT	-10.3	0	rplL_CDS
120816	+	20.94	CAAAGCGAATTCGATCTTATCCTTGCTGGTGCAGGATCTCAAAAAATCAAA	-7.5	0	rplL_CDS
120995	+	42.06	TGAAGAAGTTGGCGCTTCTGTAGAAGTTAAGTAATCTTCACTTACCTGTAG	-8.9	54.64	rplL+17
121000	+	51.56	AAGTTGGCGCTTCTGTAGAAGTTAAGTAATCTTCACTTACCTGTAGGGGAA	-9.3	55.21	rplL+22
121030	+	29825.6	CTTCACTTACCTGTAGGGGAAGCTCGCTTTTATGAGGCGAGCTTTTTCTTT	-20.7	83.43	rplL+52
121181	+	10	AGGCTTCGGAATAAAGATTTCACGTTTACCAGCGACAGCGGGGTTTTTTCT	-7.2	0	ybxB_CDS
121689	+	13.19	AAGGCTATTATATCATAAAAGCAAAAAAAGTTTGACTCGGTATTTTAACTA	-4	1.86	ybxB+16
121838	+	96	TCGGTATTTGTTTTTGGATGTGGTTTTCTTAATTAGAAACCCTTTTTTCTT	-5.6	0	ybxB+165
121969	+	19.38	TTGACAGGTCAACTAGTTCAGTATGGACGACACCGCCAGCGCAGAAGCTAT	-9.7	5.02	rpoB_CDS
121973	+	19.56	CAGGTCAACTAGTTCAGTATGGACGACACCGCCAGCGCAGAAGCTATGCTC	-8.7	1.52	rpoB_CDS
122014	+	12.25	AGCTATGCTCGCATTAGCGAAGTGTTAGAATTACCAAATCTCATTGAAATT	-7.7	0	rpoB_CDS
122460	+	14.06	AAACCGTGGCGCATGGTTAGAATACGAAACTGATGCGAAAGATGTTGTTTA	-8	0	rpoB_CDS
122508	+	280.63	TTATGTCCGCATTGATCGCACACGTAAGTTGCCGGTTACGGTTCTTTTGCG	-11	0	rpoB_CDS
122625	+	17.38	TACGCTTGATAAAGATAACACAGAAAACAGCGACAAAGCGTTGCTGGAAAT	-10.1	0	rpoB_CDS
122666	+	15.19	TGCTGGAAATTTACGAGCGTCTCCGTCCTGGAGAGCCGCCTACAGTAGAAA	-13.5	17.27	rpoB_CDS
122742	+	19.69	TTTCTTTGATCCGAAACGATACGATCTTGCCAATGTAGGACGCTATAAAAT	-6.6	0	rpoB_CDS
122863	+	16.56	ACAGGAGAAATCCTTGCTGAAAAAGGCCAGATTCTTGATAGAAGAACGCTT	-9.1	0	rpoB_CDS
122871	+	13.44	AATCCTTGCTGAAAAAGGCCAGATTCTTGATAGAAGAACGCTTGATAAAGT	-8.4	25.16	rpoB_CDS
122919	+	11.19	AGTACTGCCATACTTAGAAAACGGAATCGGTTTTAGAAAGCTGTATCCGAA	-9.6	1.19	rpoB_CDS
122940	+	14.19	CGGAATCGGTTTTAGAAAGCTGTATCCGAATGGCGGCGTTGTTGAAGATGA	-10.7	0.75	rpoB_CDS
122962	+	20.88	TATCCGAATGGCGGCGTTGTTGAAGATGAAGTGACTCTTCAATCAATTAAA	-11.1	0	rpoB_CDS
123171	+	331	CGATCATCTTGGAAACCGCCGTTTACGTTCTGTAGGCGAGCTTCTCCAGAA	-14	6.3	rpoB_CDS
123232	+	20.94	ATCGGTTTAAGCCGTATGGAGCGTGTGGTTCGTGAGAGAATGTCAATTCAA	-10	5.76	rpoB_CDS
123282	+	18.81	AGATACGAATACAATTACGCCTCAGCAGCTGATCAATATTCGTCCTGTTAT	-6.4	10.15	rpoB_CDS
123633	+	20.75	GAAGGTAACGGGCAGAATCGATTACTTAACTGCTGATGAAGAGGATAACTA	-5.7	0	rpoB_CDS
123945	+	25.63	AACTGGTATGGAATACGTATCAGGAAAAGACTCTGGTGCCGCTGTTATTTG	-10.5	0	rpoB_CDS
124002	+	18.13	CCCTGGTATCGTTGAACGCGTAGAAGCCAAAAACGTTTGGGTTCGCCGTTA	-12.3	0	rpoB_CDS
124120	+	10.38	TCTAACCAAGGTACGTGCTACAACCAGCGTCCGATCGTAAGTGTCGGCGAT	-10	0	rpoB_CDS
124231	+	10.19	CTTGGCCGTAACGTAATGGTCGGCTTCATGACGTGGGATGGCTACAACTAT	-14.3	0	rpoB_CDS
124277	+	10.75	ACTATGAGGATGCCATCATCATGAGTGAACGCCTAGTGAAGGATGATGTTT	-7	0	rpoB_CDS
124507	+	15.56	ACGCCTAAAGGCGTAACTGAACTGACTGCCGAAGAACGCCTTCTTCACGCC	-12.1	0	rpoB_CDS
124546	+	10.38	CTTCTTCACGCCATCTTTGGCGAGAAAGCCCGCGAGGTTCGTGATACTTCT	-14	0	rpoB_CDS
124582	+	23	GTTCGTGATACTTCTCTTCGTGTGCCTCATGGCGGCGGCGGAATTATCCAT	-13.2	6.55	rpoB_CDS
124778	+	24.75	AGATTCTTCCTGAAGAGGATATGCCTTACCTTCCTGACGGCACACCAATTG	-8.6	0	rpoB_CDS
124869	+	13.44	CATCGGGCAGGTATTGGAACTTCACATGGGTATGGCCGCTCGTTACCTTGG	-9.3	12.39	rpoB_CDS
125052	+	42.75	CCGTGTATCTGTCGGTATCATGTACATGATCAAACTGGCTCACATGGTTGA	-14.6	0	rpoB_CDS
125114	+	12.81	ATGCACGCTCTACAGGCCCTTACTCACTTGTTACGCAGCAGCCTCTTGGCG	-11.2	0	rpoB_CDS
125202	+	23.5	GGAGGTTTGGGCACTTGAAGCTTACGGTGCGGCTTACACTCTTCAAGAAAT	-9.2	19.51	rpoB_CDS
125307	+	47.19	CGTTAAAGGCGACAATGTTCCTGAACCAGGTGTTCCGGAATCATTCAAAGT	-9.9	0	rpoB_CDS
125376	+	27.38	AAGCTTAGGTATGGATGTCAAAATCCTTTCTGGTGATGAAGAAGAAATAGA	-7.2	1.86	rpoB_CDS
125499	+	22.56	GGAAGAAACAGCATCTGCAGACGTTGAACGCGATGTAGTAACAAAAGAATA	-5.8	0	rpoB_CDS
125504	+	21.56	AAACAGCATCTGCAGACGTTGAACGCGATGTAGTAACAAAAGAATAATCTC	-5.8	0	rpoB+4
125664	+	11	ATAAAATCCGTTCATGGTCTTTTGGTGAAGTGAAAAAGCCTGAAACGATAA	-9.3	0	rpoC_CDS
125705	+	10.06	GAAACGATAAACTATCGTACGTTAAAACCTGAAAAGGACGGTCTATTCTGC	-8.3	0	rpoC_CDS
125845	+	49.75	CGGAGTCGAAGTAACACGGGCTAAAGTCCGTCGTGAGAGAATGGGGCACAT	-9.5	20.15	rpoC_CDS
125872	+	1068.31	CCGTCGTGAGAGAATGGGGCACATTGAACTGGCTGCCCCAGTTTCCCACAT	-19.3	0	rpoC_CDS
125997	+	18.75	TTTACTTTGCTTCTTACGTTGTAACTGATCCGGCGAATACACCGCTTGAAA	-5.1	10.14	rpoC_CDS
126262	+	16.69	TAACTCAGGAAACAAGCCTTCTTGGATGATCCTTGATGTGCTTCCTGTTAT	-11.1	5.54	rpoC_CDS
126313	+	21.06	TCCTCCGGAGCTTAGACCGATGGTTCAGCTAGATGGCGGACGTTTTGCGAC	-12.7	0	rpoC_CDS
126413	+	42.56	TTGAAACGCCTTTTGGACCTTGGTGCGCCTAGCATCATCGTTCAAAACGAA	-16	0	rpoC_CDS
126822	+	13.81	TTATTAAGGAGCATCCGGTACTGCTGAACCGTGCCCCTACACTTCACAGAT	-10.7	6.76	rpoC_CDS
126861	+	30.44	CACTTCACAGATTAGGTATCCAGGCGTTTGAACCAACGCTTGTTGAAGGAC	-12.2	12.25	rpoC_CDS
127095	+	25.75	TGGTACTAGGTAACTATTACCTGACACTTGAGCGTGCCGGTGCTGTCGGTG	-12.3	0	rpoC_CDS
127230	+	11.44	CAGCTAACTCACTTAAGAATGTGACATTTACCGAAGAACAGCGCTCAAAAT	-3.5	0.62	rpoC_CDS
127343	+	20.25	ATGAATGAACCAACGAAGAGCAACATTGAAGAGAAAACACCTGACCGTTTC	-0.2	0	rpoC_CDS
127408	+	58.63	TGCTGATGTTAAAGCTGTTATCGCACAGCAGCCAATCAATGCGCCGTTTAA	-9	4.55	rpoC_CDS
127662	+	16.44	TGAAGCAATTCCGCCGCGGTCTTATCACTGAAGAAGAACGCTATGAGAGAG	-7.5	0	rpoC_CDS
127712	+	23.06	GTCATCTCTATCTGGAGTGCTGCAAAAGACGTTATCCAAGGCAAACTGATG	-5.8	0	rpoC_CDS
128099	+	13.38	AAAGAAGGAACTGAAACAATTGAGCGCTTAGAAGAACGCTTAATCGGACGT	-8.1	10	rpoC_CDS
128234	+	14.56	GAGATTGTCGAAGCCGGCATTGAAGAAGTGTGGATCCGTTCTGCCTTCACA	-13.5	0	rpoC_CDS
128406	+	14.5	CACAGTTAACAATGCGTACATTCCATACAGGCGGGGTTGCCGGAGACGATA	-7	6.8	rpoC_CDS
128613	+	15.25	CTTATACGGCACCTTACAACTCCCGCCTGAAAGTAGCGGAAGGAGATAAAA	-6.9	0	rpoC_CDS
128645	+	11.25	GTAGCGGAAGGAGATAAAATTACTCGAGGCCAAGTACTGACAGAAGGTTCA	-3.9	0	rpoC_CDS
128791	+	16.69	TGAAATCGGTGATAAACACGTAGAAGTAATGGTTCGCCAGATGCTTCGCAA	-10.3	0	rpoC_CDS
128834	+	12.94	CTTCGCAAAGTACGCGTGATTGATGCCGGTGACACTGATGTGCTTCCAGGT	-8.8	3.07	rpoC_CDS
128842	+	12.56	AGTACGCGTGATTGATGCCGGTGACACTGATGTGCTTCCAGGTACATTGCT	-11.2	0	rpoC_CDS
128854	+	11.94	TGATGCCGGTGACACTGATGTGCTTCCAGGTACATTGCTTGATATTCACCA	-12.6	3.78	rpoC_CDS
128862	+	11.75	GTGACACTGATGTGCTTCCAGGTACATTGCTTGATATTCACCAATTTACTG	-8.4	9.06	rpoC_CDS
129158	+	374.88	GTAAAACCAGTATCAAATGTTCAGCCGACTGACGATATGGTCCCGGTTGAA	-13.4	99.18	rpoC_CDS
129214	+	10.88	GATTTAACTCTGCTGAAAGACTGCAAAAACAGTCTTTCAGCAGATATATTT	-25.3	10.81	rpoC+53
129371	+	30.75	TACTTTGGAGGATATGTTTATGTCTTATGATAAAGTATCACAGGCCAAATC	-8.4	0	ybxF_CDS
129580	+	392.69	AGCTCGGCAAAGCCTGCGGAATTGAGGTAGGAGCAGCCGCTGTTGCCATTA	-16.1	0	ybxF_CDS
129607	+	66.75	TAGGAGCAGCCGCTGTTGCCATTATTTTATAACGTACTTTTGTTTTTGCGT	-7.1	0	ybxF+19
129640	+	1376.69	GTACTTTTGTTTTTGCGTAAGATTCCATCTTGTGTAAAGACATTGTTTTTT	-13.5	0	ybxF+52
129680	+	137.06	CATTGTTTTTTGCCTTTTGATGAACCACCTGGGTATGTGGGTTATAAAACG	-7.5	0	ybxF+92
129711	+	58.5	GGTATGTGGGTTATAAAACGTAATGAAGGGAGGAAAAATTCATGCCTACAA	-8.6	0	rpsL_CDS
129829	+	48.06	AGGATACAACAGCTTTAAAAAAGAGCACACTAACGTATCTTCTCCACAAAA	-6.4	13.6	rpsL_CDS
129858	+	103.75	CTAACGTATCTTCTCCACAAAAACGCGGGGTATGTACTCGTGTTGGTACAA	-12.1	0	rpsL_CDS
129889	+	126.06	ATGTACTCGTGTTGGTACAATGACACCGAAAAAACCGAACTCAGCACTTCG	-6.7	6.68	rpsL_CDS
130115	+	230.19	AACCGTGCACAAGGCCGTTCTAAATACGGTACGAAAAAACCTAAAGCAAAA	-6.4	7.52	rpsL_CDS
130188	+	28.25	TTGATGAAGGGAGGATATTCAGATGCCACGTAAAGGTCCTGTAGCAAAAAG	-4	0	rpsG_CDS
130246	+	15.31	TTACCTGATCCGATTTACAACTCTAAGCTTGTATCTCGTTTAATCAACAAA	-6.1	0	rpsG_CDS
130335	+	13.13	CCTATACAAGTCATTCGATATCATTAAAGAACGTACTGGCAATGATGCAAT	-3.6	14.8	rpsG_CDS
130384	+	25.56	ATGGAGGTTTTCGAACAAGCATTGAAAAACATCATGCCTGTACTTGAAGTA	-8.6	0.64	rpsG_CDS
130472	+	35.25	CTGTAGAAGTTCGTCCTGAACGTCGTACGACTCTTGGACTTCGCTGGTTAG	-8.6	0	rpsG_CDS
130494	+	75.81	TCGTACGACTCTTGGACTTCGCTGGTTAGTTAACTACGCTCGTCTTCGTGG	-10	0	rpsG_CDS
130547	+	14.13	AAAAAACGATGGAAGAGCGTTTAGCTAACGAAATCCTTGACGCAGCTAACA	-5.9	0	rpsG_CDS
130573	+	14.69	AACGAAATCCTTGACGCAGCTAACAACACTGGTGCTGCTGTTAAGAAACGT	-14.5	2.54	rpsG_CDS
130606	+	23.88	GCTGCTGTTAAGAAACGTGAAGACACTCATAAGATGGCTGAAGCAAACAAA	-7.1	0.07	rpsG_CDS
130650	+	91.31	AAACAAAGCATTTGCTCACTATCGCTGGTAGGATTTATAGATTAACAAAAC	-4.1	8.72	rpsG+20
130684	+	13.88	TTATAGATTAACAAAACACAATTTCCTAATAAGGAAGGAGAAATTACCCAA	-5	41.17	fusA_CDS
130761	+	93.44	ACTCGTAATATCGGTATCATGGCTCACATCGATGCCGGTAAAACGACTACT	-19.6	4.51	fusA_CDS
130814	+	63.63	AGAACGTATCTTGTTCTATACTGGTCGTATCCACAAAATTGGTGAAACTCA	-7	0	fusA_CDS
130869	+	55.69	GGAGCTTCACAAATGGACTGGATGGAGCAGGAACAAGAACGTGGTATCACA	-7.3	0	fusA_CDS
131001	+	38.94	GTTGAAGTTGAACGTTCTCTTCGTGTACTTGATGGTGCTGTTGCTGTACTT	-8.7	1.58	fusA_CDS
131007	+	39.38	GTTGAACGTTCTCTTCGTGTACTTGATGGTGCTGTTGCTGTACTTGACGCG	-7.1	0	fusA_CDS
131062	+	33.63	CAGGCGTTGAGCCTCAAACAGAAACTGTTTGGCGTCAGGCAACAACTTATG	-14	8.25	fusA_CDS
131092	+	171.31	GGCGTCAGGCAACAACTTATGGAGTACCGCGTATCGTTTTTGTTAACAAAA	-6.3	10.22	fusA_CDS
131136	+	23.31	AACAAAATGGACAAAATCGGTGCAGACTTCCTTTACTCTGTAGGAACTTTA	-4.9	7.81	fusA_CDS
131326	+	42.19	AAATCCCTGAAGAGTACAAAGAGCAAGCTGAAGAGCTTCGCAACAGCCTTA	-7.8	7.16	fusA_CDS
131354	+	30.25	TGAAGAGCTTCGCAACAGCCTTATTGAAGCTGTATGTGAGCTTGATGAAGA	-16.4	0	fusA_CDS
131358	+	31.38	GAGCTTCGCAACAGCCTTATTGAAGCTGTATGTGAGCTTGATGAAGAGCTT	-16.4	0	fusA_CDS
131388	+	151	TGTGAGCTTGATGAAGAGCTTATGGATAAGTACCTTGAGGGTGAAGAAATC	-13	0.33	fusA_CDS
131497	+	28.19	CTGTTCTTGTTGGTTCTGCCTTCAAAAACAAAGGTGTTCAACTAGTACTTG	-9.3	0	fusA_CDS
131564	+	175.38	CCTTCCTGCACCAACTGACGTTGCTGCAATCAAAGGTACACGTCCTGATAC	-10	16.11	fusA_CDS
131596	+	16.94	AAGGTACACGTCCTGATACAAATGAAGAGATTGAGCGTCATTCTTCTGACG	-6	0.57	fusA_CDS
131603	+	19.69	ACGTCCTGATACAAATGAAGAGATTGAGCGTCATTCTTCTGACGAAGAGCC	-6.8	3.13	fusA_CDS
131621	+	73.56	AGAGATTGAGCGTCATTCTTCTGACGAAGAGCCATTCTCTGCATTAGCATT	-13.1	0	fusA_CDS
131650	+	19.81	AGCCATTCTCTGCATTAGCATTTAAAGTTATGACTGACCCTTACGTTGGTA	-7.1	0	fusA_CDS
131717	+	20.38	TGTGTACTCTGGAACACTTGATTCTGGTTCATACGTGAAAAACTCTACTAA	-5.5	1.05	fusA_CDS
131752	+	26.06	TGAAAAACTCTACTAAAGGCAAACGTGAGCGTGTTGGACGTATTCTTCAAA	-3.6	0	fusA_CDS
131921	+	19.13	CCTTGAGTCAATGGAATTCCCAGAACCAGTTATCGACGTTGCTATTGAGCC	-5.4	2.1	fusA_CDS
132007	+	23	CTTTAGCGAAACTTGCTGAAGAAGATCCTACATTCCGTACTCAAACAAACC	-8.7	7.7	fusA_CDS
132010	+	23.5	TAGCGAAACTTGCTGAAGAAGATCCTACATTCCGTACTCAAACAAACCCAG	-3.7	8.03	fusA_CDS
132014	+	24.63	GAAACTTGCTGAAGAAGATCCTACATTCCGTACTCAAACAAACCCAGAAAC	-1	44.21	fusA_CDS
132027	+	53.56	GAAGATCCTACATTCCGTACTCAAACAAACCCAGAAACTGGCCAAACGATC	-3.5	6.12	fusA_CDS
132090	+	280.81	GGTGAACTTCACCTTGATATCATTGTTGACCGTATGAAACGCGAATTTAAA	-7.8	0	fusA_CDS
132165	+	18.38	CAAGTTGCGTACCGTGAAACATTCCGTACCGGTGCAAAAGTTGAAGGTAAA	-10.3	0	fusA_CDS
132207	+	10.44	GAAGGTAAATTCGTACGTCAGTCTGGTGGACGCGGTCAGTTCGGACACGTT	-10.6	8.44	fusA_CDS
132252	+	111.5	CACGTTTGGATCGAATTCGAACCAAACGAAGAAGGCGCTGGCTTTGAATTT	-16.9	0	fusA_CDS
132371	+	65.44	TGCACTCGAAAATGGTGTACTAGCAGGCTTCCCGCTTATCGACATTAAAGC	-6.9	0.02	fusA_CDS
132395	+	36.19	AGGCTTCCCGCTTATCGACATTAAAGCTAAACTTTTCGACGGTTCTTACCA	-8	2.37	fusA_CDS
132426	+	17.69	CTTTTCGACGGTTCTTACCATGATGTTGACTCAAACGAAATGGCATTTAAA	-5.8	0	fusA_CDS
132496	+	39.5	TGAAAAATGCAGTCAGCAAATGTAACCCAGTTCTTCTTGAACCAATCATGA	-4.9	0	fusA_CDS
132746	+	131.94	GGATCACTACGAAGAAGTGCCGAAGAGCGTCGCAGAAGAAATTATCAAAAA	-3.5	0	fusA_CDS
132794	+	92.63	AAAAAATAAAGGCGAATAATTGATTTTGCCGCTTAACTCAAGTATAACTAC	-7.7	0	fusA+32
132840	+	1256	ACTACTATTGTAAGATGAGGAAGTGAAAGCTTTCTTTCACTTCCTATCACT	-20.5	0	fusA+78
132924	+	21.63	ATTTTAGAATGGCTAAAGAAAAATTCGACCGTTCCAAATCACATGCCAATA	-4.9	0	tufA_CDS
132961	+	29.69	ATCACATGCCAATATTGGTACAATTGGACACGTTGACCATGGTAAAACAAC	-10.1	0	tufA_CDS
132994	+	49.75	TGACCATGGTAAAACAACTTTAACTGCTGCTATCACAACAGTACTTCATAA	-3.5	0	tufA_CDS
133033	+	43.06	AGTACTTCATAAGAAATCTGGTAAAGGTACAGCTATGGCGTACGATCAAAT	-8.8	0	tufA_CDS
133113	+	54.38	GTATCACAATCTCTACTGCACACGTTGAGTACGAAACTGAAACTCGTCACT	-4.4	4.86	tufA_CDS
133148	+	17.44	ACTGAAACTCGTCACTATGCACACGTTGACTGCCCAGGACACGCTGACTAT	-5.1	8.04	tufA_CDS
133257	+	120.81	CTGCTGATGGCCCAATGCCACAAACTCGTGAGCACATCCTTCTTTCTAAAA	-7.3	7.63	tufA_CDS
133293	+	80.38	TCCTTCTTTCTAAAAACGTTGGTGTACCATACATCGTTGTATTCTTAAACA	-6.9	0	tufA_CDS
133333	+	153.69	ATTCTTAAACAAATGCGACATGGTAGACGACGAAGAGCTTCTTGAACTAGT	-4.1	0	tufA_CDS
133353	+	22.38	TGGTAGACGACGAAGAGCTTCTTGAACTAGTTGAAATGGAAGTTCGCGATC	-8.8	0	tufA_CDS
133355	+	22.38	GTAGACGACGAAGAGCTTCTTGAACTAGTTGAAATGGAAGTTCGCGATCTT	-9.9	0	tufA_CDS
133454	+	49.94	TCTGCTCTTAAAGCTCTTGAAGGAGACGCTGAGTGGGAAGCTAAAATCTTC	-13	0	tufA_CDS
133515	+	122.69	ATGCGGTTGATGAGTACATCCCAACTCCAGAACGCGACACTGAAAAACCAT	-7.2	0.67	tufA_CDS
133570	+	20.44	GATGCCAGTTGAGGACGTATTCTCAATCACTGGTCGTGGTACAGTTGCTAC	-17.5	0	tufA_CDS
133610	+	87.94	ACAGTTGCTACTGGCCGTGTAGAACGCGGACAAGTTAAAGTCGGTGACGAA	-13.4	6.25	tufA_CDS
133646	+	76.75	AAAGTCGGTGACGAAGTTGAAATCATCGGTCTTCAAGAAGAGAACAAGAAA	-7.4	0	tufA_CDS
133802	+	104.31	CGTGGTCAAGTACTTGCTAAACCAGGTACAATCACTCCACACAGCAAATTC	-11.4	0	tufA_CDS
133933	+	196.75	CTTCCGTACAACTGACGTAACTGGTATCATCCATCTTCCAGAAGGCGTAGA	-7.3	1.1	tufA_CDS
133956	+	116.94	GTATCATCCATCTTCCAGAAGGCGTAGAAATGGTTATGCCTGGAGATAACA	-13	1.73	tufA_CDS
134077	+	125.31	CGGACGTACTGTTGGTTCAGGCGTTGTTTCTACAATCACTGAGTAATAGTA	-14.8	22.04	tufA+5
134114	+	28399.9	ACTGAGTAATAGTATGGTTTTAAACGAGACCCCTGTGGGTCTCGTTTTTTG	-17.3	99.12	tufA+42
135322	+	198.25	TGACACACCCGGCCGCTTTGCCATGGCAAGGTGTTCAGGTTTTTCTCACGG	-14.2	0	ybaC+195
135357	+	162.13	CAGGTTTTTCTCACGGAGAACTGTCTAACGTGATGTAGGCGAAAAGGAGGG	-9.6	41.83	ybaC+230
135380	+	188.63	TCTAACGTGATGTAGGCGAAAAGGAGGGAAAATAATGGCAAAACAAAAAAT	-1.1	0	rpsJ_CDS
135500	+	35.94	AAAACGTTCTGGTGCCAGCGTATCTGGTCCGATTCCGTTGCCAACTGAAAA	-9.9	0	rpsJ_CDS
135539	+	123.31	GCCAACTGAAAAATCAGTTTACACAATCCTTCGTGCGGTGCACAAATACAA	-8.5	0.45	rpsJ_CDS
135557	+	158.25	TTACACAATCCTTCGTGCGGTGCACAAATACAAAGATTCTCGTGAGCAATT	-4	0	rpsJ_CDS
135615	+	48.75	CGTACACATAAACGTTTAATCGACATTGTGAACCCAACACCACAAACTGTT	-4.7	0	rpsJ_CDS
135620	+	47.81	ACATAAACGTTTAATCGACATTGTGAACCCAACACCACAAACTGTTGATGC	-9.6	0	rpsJ_CDS
135631	+	30.25	TAATCGACATTGTGAACCCAACACCACAAACTGTTGATGCTCTTATGCGAT	-11.3	0	rpsJ_CDS
135660	+	104.88	ACTGTTGATGCTCTTATGCGATTAGACTTACCATCTGGTGTCGATATCGAA	-8	0	rpsJ_CDS
135689	+	34.75	ACCATCTGGTGTCGATATCGAAATTAAACTTTAATTCTAAAATATAGAATG	-7.1	0	rpsJ+17
135740	+	52.94	ATCTTAATAGGAGGTGTGACGAATGACCAAAGGAATCTTAGGAAGAAAAAT	-6.9	0.65	rplC_CDS
135762	+	18.19	ATGACCAAAGGAATCTTAGGAAGAAAAATTGGTATGACGCAAGTATTCGCT	-5	0	rplC_CDS
135818	+	19.56	TGGTGATCTTATTCCGGTAACTGTTATCGAGGCTGCTCCAAACGTTGTTCT	-5.3	0	rplC_CDS
135954	+	64.56	GAAAAAGGGCACGTTGCAAAAGCGGAAACTGCTCCTAAGCGCTTCGTTAAA	-10.1	0	rplC_CDS
135965	+	43.63	CGTTGCAAAAGCGGAAACTGCTCCTAAGCGCTTCGTTAAAGAATTACGCGG	-9.1	0	rplC_CDS
135976	+	66.88	CGGAAACTGCTCCTAAGCGCTTCGTTAAAGAATTACGCGGAGTGGAAATGG	-13	0	rplC_CDS
136003	+	16.63	AAGAATTACGCGGAGTGGAAATGGATGCGTATGAAGTTGGTCAGGAAGTCA	-7.4	12.86	rplC_CDS
136037	+	23.56	AGTTGGTCAGGAAGTCAAGGTTGAAATTTTCTCTGCTGGAGAAATCGTAGA	-5.8	5.79	rplC_CDS
136104	+	57	AAAGGTAAAGGTTTCCAAGGTGCGATCAAGCGCCACGGACAATCTCGCGGA	-15.1	11.36	rplC_CDS
136183	+	20.25	GTCGTCCTGGTTCAATGGGACCTGTAGATCCTAACCGTGTATTCAAAGGTA	-8.6	0	rplC_CDS
136249	+	13.44	GTATGGGCGGAGAGCAAATCACTGTTCAAAACCTTGAAATCGTAAAAGTTG	-8	1.29	rplC_CDS
136309	+	46.19	GCAATCTTCTTTTGATCAAAGGTAACGTACCTGGTGCGAAGAAATCTTTAA	-9.5	3.4	rplC_CDS
136311	+	46.31	AATCTTCTTTTGATCAAAGGTAACGTACCTGGTGCGAAGAAATCTTTAATC	-9.5	3.35	rplC_CDS
136314	+	47.63	CTTCTTTTGATCAAAGGTAACGTACCTGGTGCGAAGAAATCTTTAATCACT	-9.5	3.3	rplC_CDS
136342	+	32.88	GTGCGAAGAAATCTTTAATCACTGTTAAAAGTGCTGTTAAATCTAAATAAT	-5	0	rplC+1
136371	+	20.56	AGTGCTGTTAAATCTAAATAATTCTCTTAGGAAAGGAGGAAATTGATTATG	-5.2	20.82	rplD_CDS
136444	+	28	AAAACGGTTCTACTGCTGGTGACATCGAATTAAACGCTTCTGTATTTGGTA	-6.2	0	rplD_CDS
136482	+	119.38	TCTGTATTTGGTATCGAACCAAATGAGAGTGTTGTATTCGACGCTATTCTT	-14.7	1.27	rplD_CDS
136622	+	41.94	AGGTACTGGACGTGCCCGTCAAGGTTCAATCCGTTCACCGCAATGGCGCGG	-12.6	0	rplD_CDS
136669	+	111.81	GCGGAGGTGGTGTCGTATTCGGCCCAACACCACGCAGCTATTCTTATAAAT	-14.5	11.13	rplD_CDS
136735	+	10	GCCGCTTGGCAATCAAATCAGTATTGTCTTCTAAAGTGATCGACAACAACA	-9	6.52	rplD_CDS
136779	+	116.06	AACAACATCATCGTTCTTGAAGATCTTACTCTTGATACGGCTAAAACAAAA	-3.2	5.01	rplD_CDS
136995	+	105	CTGATTACAAAAGCAGCGGTTGAAAAAGTAGAGGAGGTGCTTGCATAATGA	-6.7	0	rplW_CDS
137052	+	130.25	CTCGTGATGTTCTAAAGCGCCCCGTCATTACTGAACGTTCTGCCGATTTAA	-5.8	18.75	rplW_CDS
137206	+	18.13	CATCATGAACTACAAAGGCAAATCAAAACGTGTTGGACGCTACACTGGTAT	-3.7	0	rplW_CDS
137287	+	116	ACTTACTGCAGACAGCAAAGAAATCGAAATTTTTGAAGCTTAATTATCTGT	-5	0	rplW+8
137324	+	27.13	GCTTAATTATCTGTAAAAAGAAGGAGGGAAATTCAAAATGGCGATTAAAAA	-2.4	0	rplB_CDS
137454	+	44.88	TCCTTGCTTGCTCCCCTTCACAAAAAAGGCGGACGTAACAACCAAGGTAAA	-13	0	rplB_CDS
137491	+	23.13	ACAACCAAGGTAAATTGACTGTACGTCACCAAGGTGGCGGACATAAACGCC	-13.3	10.88	rplB_CDS
137518	+	72.56	ACCAAGGTGGCGGACATAAACGCCAATACCGTGTTATCGACTTCAAACGCG	-12.2	0	rplB_CDS
137558	+	22.75	CTTCAAACGCGATAAAGATGGTATACCTGGACGCGTTGCTACAGTTGAATA	-6.7	5.89	rplB_CDS
137634	+	41.81	GCTCTAATCAACTATGCAGACGGAGAAAAACGTTACATTCTTGCTCCTAAA	-4.9	2.59	rplB_CDS
137741	+	39.69	TAATGCACTTCCACTTATCAACATCCCTGTTGGTACAGTTGTGCATAACAT	-14.5	0	rplB_CDS
137773	+	32.75	GTACAGTTGTGCATAACATTGAATTAAAACCTGGTAAAGGCGGACAGCTTG	-6.6	0	rplB_CDS
137811	+	21.63	GGCGGACAGCTTGTACGTTCAGCTGGTACATCTGCTCAGGTTCTTGGTAAA	-11.1	9.75	rplB_CDS
138142	+	60.19	AGAAAAAGAACAAATCCGATAAATTTATCGTACGTCGTCGTAAAAATAAAT	-5.7	22.17	rplB_CDS
138188	+	5402.38	TAAATAACGGGGTTGTCTACGGTTCTTTTCGGACCGTAGTGCAATCACGAA	-21.1	28.52	rplB+44
138227	+	43.44	TGCAATCACGAAGGGAGGTTCCAAAATGGCTCGCAGCTTAAAAAAAGGACC	-6	0	rpsS_CDS
138230	+	42.44	AATCACGAAGGGAGGTTCCAAAATGGCTCGCAGCTTAAAAAAAGGACCATT	-7.5	0	rpsS_CDS
138244	+	26.88	GTTCCAAAATGGCTCGCAGCTTAAAAAAAGGACCATTTGTCGATGGACACT	-8.6	1.16	rpsS_CDS
138258	+	16.56	CGCAGCTTAAAAAAAGGACCATTTGTCGATGGACACTTGATGACTAAAATC	-5.6	2.75	rpsS_CDS
138266	+	26.75	AAAAAAAGGACCATTTGTCGATGGACACTTGATGACTAAAATCGAGAAATT	-9.2	1.07	rpsS_CDS
138448	+	30.25	TGGTAGGGCACAAGTTGGGTGAATTCGCTCCAACTCGTACGTACAAAGGTC	-13	0	rpsS_CDS
138471	+	105.94	TTCGCTCCAACTCGTACGTACAAAGGTCATGCTAGTGATGACAAAAAAACA	-5	8.7	rpsS_CDS
138638	+	202.94	AGGCAGTATCAATCTTGAACCTTACACCAAGAGCTGCTTCTCCAATTATCG	-9.9	10.82	rplV_CDS
138682	+	125.25	ATTATCGAGAAAGTATTAAAATCCGCTATTGCAAATGCTGAGCATAACTAT	-4	0	rplV_CDS
138813	+	77.69	TATGGGACGTGCGAGCCAAATCAACAAACGTACGAGCCACATTACAATCGT	-10.4	0	rplV_CDS
138837	+	25.38	CAAACGTACGAGCCACATTACAATCGTTGTATCAGAAAAGAAGGAGGGATA	-3.3	10.71	rplV_CDS
138956	+	57.88	GGTACGCTGGTAAAGATTACGCTGACTTCCTGCACGAAGATTTAAAAATTC	-4.2	9.2	rpsC_CDS
138993	+	10.56	AGATTTAAAAATTCGTGAATACATTAGCAAACGCCTTTCTGACGCTTCTGT	-2.8	0	rpsC_CDS
139100	+	20.31	CTAAGCCTGGTATGGTTATCGGTAAAGGCGGTTCTGAAGTCGAAGCACTTC	-8.5	0	rpsC_CDS
139102	+	20.31	AAGCCTGGTATGGTTATCGGTAAAGGCGGTTCTGAAGTCGAAGCACTTCGC	-10.2	0	rpsC_CDS
139142	+	77.81	AAGCACTTCGCAAAGCCCTTAACAGCCTTACTGGCAAGCGTGTACACATTA	-6.4	1.08	rpsC_CDS
139149	+	81.31	TCGCAAAGCCCTTAACAGCCTTACTGGCAAGCGTGTACACATTAACATTCT	-7.9	0	rpsC_CDS
139256	+	33.81	AATTAGAAAACCGTGTTTCTTTCCGCCGTGCGCAGAAACAACAAATCCAAC	-8.5	7.82	rpsC_CDS
139334	+	22.88	TGAAAACAATGGTTTCTGGTCGTCTTGGCGGTGCAGATATCGCTCGTTCTG	-9.4	0	rpsC_CDS
139479	+	48.81	TGTAAAAGTCTGGATCTATCGTGGAGAGGTTCTTCCTACTAAGAAGAAAAA	-5.7	5.36	rpsC_CDS
139491	+	46.06	GATCTATCGTGGAGAGGTTCTTCCTACTAAGAAGAAAAATGAGGAAGGAGG	-7.8	25.15	rpsC_CDS
139500	+	55.44	TGGAGAGGTTCTTCCTACTAAGAAGAAAAATGAGGAAGGAGGAAAATAATA	-8.6	0	rplP_CDS
139519	+	17	AAGAAGAAAAATGAGGAAGGAGGAAAATAATATGTTATTACCAAAACGCGT	-0.7	9.35	rplP_CDS
139669	+	56.5	TTGGATTACTAACCGTCAAATCGAAGCTGCACGTATTGCGATGACTCGTTA	-4.7	0	rplP_CDS
139701	+	16.25	GTATTGCGATGACTCGTTACATGAAACGTGGCGGTAAAGTTTGGATCAAAA	-9.8	0	rplP_CDS
139735	+	17.31	TAAAGTTTGGATCAAAATTTTCCCTTCTAAACCTTACACTGCTAAACCACT	-4.8	11.07	rplP_CDS
139773	+	19.13	CTGCTAAACCACTTGAGGTACGTATGGGATCCGGTAAAGGGGCTCCAGAAG	-9.4	2.37	rplP_CDS
139811	+	50.19	GGGGCTCCAGAAGGTTGGGTAGCTGTTGTAAAACCGGGCAAAGTTTTATTT	-8.4	0	rplP_CDS
139930	+	23.63	TAAAACGAAGTTCGTAAAACGTGAAGAAATTGGTGGTGAATCAAATGAAAG	-3.6	2.16	rpmC_CDS
139967	+	67.88	GAATCAAATGAAAGCTAATGAAATTCGTGACCTTACCACTGCTGAAATTGA	-1.9	15.24	rpmC_CDS
140035	+	22.63	TTAAAGAAGAACTTTTCAATCTTCGCTTTCAATTAGCGACAGGACAACTTG	-7.7	0	rpmC_CDS
140067	+	40.94	TTAGCGACAGGACAACTTGAAAATACTGCTCGCATTCGTGAAGTGCGCAAA	-9.3	0	rpmC_CDS
140124	+	65.06	GCGCGCATGAAAACTGTGATTCGTGAAAGAGAAATTGCTGCTAATAAATAA	-5.6	2.76	rpmC_CDS
140201	+	15.75	GCGAACGTAACCAACGCAAAGTTTACCAAGGCCGTGTTGTTTCTGACAAAA	-6.3	0	rpsQ_CDS
140225	+	31.44	ACCAAGGCCGTGTTGTTTCTGACAAAATGGATAAAACCATTACTGTTGTTG	-6.1	0	rpsQ_CDS
140241	+	20.75	TTCTGACAAAATGGATAAAACCATTACTGTTGTTGTTGAGACATACAAAAA	-7.9	0	rpsQ_CDS
140281	+	177.94	ACATACAAAAAACATACACTTTACGGTAAACGCGTAAAATACTCAAAAAAA	-4.4	0.3	rpsQ_CDS
140411	+	53.56	CTAAGCGTTTCCGTCTAGTTGAAGTTGTCGAAGAAGCTGTTATTATCTAAT	-5	0	rpsQ+1
140436	+	42.38	TGTCGAAGAAGCTGTTATTATCTAATAAAGTTCGGAATTCTTTTTCCGAAG	-8.9	30.17	rpsQ+26
140515	+	18.94	GACTCGTTTAAAAGTAGCTGACAACTCTGGCGCACGTGAAGTACTTACTAT	-2.9	0	rplN_CDS
140573	+	57.13	CTTGGTGGTTCTGGACGTAAAACAGCTAACATTGGTGATGTAATTGTTTGC	-4.6	0	rplN_CDS
140611	+	60.13	TGTAATTGTTTGCACGGTTAAACAAGCAACACCAGGAGGCGTTGTCAAAAA	-11.5	1.56	rplN_CDS
140666	+	23.31	GAAGTCGTAAAAGCTGTTATCGTTCGCACTAAAAGCGGAGCGCGCAGAAGT	-10.8	12.53	rplN_CDS
140695	+	42.25	TAAAAGCGGAGCGCGCAGAAGTGACGGTTCATACATCAGCTTCGATGAGAA	-10.5	0	rplN_CDS
140881	+	41.44	GCCTTACTCAAGGAGGTGCGATCAGGATGCATGTAAAAAAAGGCGATAAAG	-8.2	5.85	rplX_CDS
141031	+	14.13	AGAAACACTCTAAACCAACTCAAGCTAACCCTCAAGGCGGTATTTCTAATC	-3.5	0	rplX_CDS
141110	+	42.44	TATGCCGCTCGATCCTAAAACAGGTGAAGTGACTCGCGTAGGATACAAAGT	-7.8	0	rplX_CDS
141130	+	23.38	CAGGTGAAGTGACTCGCGTAGGATACAAAGTGGAAGATGGCAAAAAAGTTC	-3.1	13.83	rplX_CDS
141133	+	24	GTGAAGTGACTCGCGTAGGATACAAAGTGGAAGATGGCAAAAAAGTTCGTG	-4	22.84	rplX_CDS
141171	+	16.81	AAAAAAGTTCGTGTAGCAAAAAAATCTGGGCAAGTTCTAGATAAATAGTAT	-7.4	1.36	rplX+3
141216	+	21.13	TAGTATTAAAAGGAAGGGAGGTCTATCTCATGAACCGCCTTAAAGAAAAGT	-7.7	2.17	rplE_CDS
141225	+	16.94	AAGGAAGGGAGGTCTATCTCATGAACCGCCTTAAAGAAAAGTACAATAAAG	-7.7	0	rplE_CDS
141230	+	16.69	AGGGAGGTCTATCTCATGAACCGCCTTAAAGAAAAGTACAATAAAGAAATT	-7.4	5.21	rplE_CDS
141306	+	26.38	ACTATGATTCAGTCATGCAAGTGCCTAAAATCGAAAAAATCGTAATCAACA	-3.2	0	rplE_CDS
141482	+	21.38	CGTGAGGGAATGCCTATCGGTGCGAAAGTAACTCTTCGCGGAGAGCGCATG	-12.3	8.49	rplE_CDS
141552	+	23	TTATTTCTGTATCTTTACCGCGTGTACGTGACTTCCGCGGGGTTTCTAAAA	-8.4	0	rplE_CDS
141627	+	43.06	ACACACTTGGTATCAAAGAACAGTTAATCTTCCCTGAAATTGACTACGATA	-3.9	0	rplE_CDS
141736	+	65.13	AGAAGCTCGTGAGCTATTAACTCAAGTAGGTATGCCGTTCCAGAAATAATC	-5	0	rplE+2
141764	+	14.69	GGTATGCCGTTCCAGAAATAATCAATGAAAGGGAGGCGAAATCGTGGCTAA	-7.8	0	rpsN_CDS
141803	+	66.88	AATCGTGGCTAAAAAGTCTATGATTGCGAAACAACAACGTACACCAAAGTT	-7.9	0	rpsN_CDS
141951	+	15.69	TATAAAGGACAAATTCCTGGCGTGAAAAAAGCCAGCTGGTAATCCCCAAGA	-10.5	0	rpsN+9
141957	+	14	GGACAAATTCCTGGCGTGAAAAAAGCCAGCTGGTAATCCCCAAGAAAGGGA	-11.7	23.3	rpsN+15
141971	+	17.63	CGTGAAAAAAGCCAGCTGGTAATCCCCAAGAAAGGGAAGGAGGTAATTATA	-7.7	1.68	rpsN+29
141974	+	17.5	GAAAAAAGCCAGCTGGTAATCCCCAAGAAAGGGAAGGAGGTAATTATATAA	-7.7	3.19	rpsH_CDS
142002	+	11.38	AAGGGAAGGAGGTAATTATATAATGGTTATGACAGATCCAATTGCAGATAT	-5.5	0	rpsH_CDS
142007	+	14.63	AAGGAGGTAATTATATAATGGTTATGACAGATCCAATTGCAGATATGCTAA	-6.2	0	rpsH_CDS
142021	+	18.81	ATAATGGTTATGACAGATCCAATTGCAGATATGCTAACTCGTATTCGCAAT	-9.6	0	rpsH_CDS
142028	+	26.81	TTATGACAGATCCAATTGCAGATATGCTAACTCGTATTCGCAATGCAAACA	-8.4	1.39	rpsH_CDS
142073	+	93.06	CAAACATGGTACGTCATGAGAAGCTTGAAATTCCTGCTTCTAAATTGAAAA	-10.2	7.57	rpsH_CDS
142149	+	36.69	TGAAGGTTTCATTCGTGACGTTGAGTTCGTAGAAGACAGCAAACAAGGTAT	-4.9	0	rpsH_CDS
142321	+	12.44	GGTCTTGGAATCGCGATTATTTCTACATCACAAGGTGTTTTAACGGACAAA	-5.8	8.77	rpsH_CDS
142380	+	58.38	TGCAAAACAAGCTGGTGGAGAAGTTCTAGCATACGTTTGGTAAGAAGTTTA	-7.8	0	rpsH+8
142460	+	39.69	TGTAGGTAAGAAGCTACTTGAGATTCCTTCTGATGTTACAGTAACGTTAAA	-8.6	0	rplF_CDS
142526	+	71.25	AGCTGTGAAAGGACCAAAAGGAGAATTAACTCGTACGTTTCACCCTGATAT	-4.9	17.73	rplF_CDS
142529	+	71.5	TGTGAAAGGACCAAAAGGAGAATTAACTCGTACGTTTCACCCTGATATGGA	-7.4	17.73	rplF_CDS
142547	+	63.94	AGAATTAACTCGTACGTTTCACCCTGATATGGAGATTAAAGTAGAGGACAA	-5.4	15.43	rplF_CDS
142580	+	21.63	GATTAAAGTAGAGGACAATGTGCTTACAGTCGCTCGTCCTTCTGATCAAAA	-10.4	13.57	rplF_CDS
142608	+	12.5	GTCGCTCGTCCTTCTGATCAAAAAGAGCACCGTGCCCTGCATGGTACGACT	-13.7	0	rplF_CDS
142898	+	13.94	CCGCGCTGTACGTTCTCCAGAGCCTTACAAAGGTAAAGGAATCCGCTACGA	-9.4	0	rplF_CDS
142958	+	44.44	TGTTCGCCGTAAAGAAGGTAAATCTGCTAAGTAAGATCGCTTAAAGTGAAG	-7	6.72	rplF+17
143013	+	12.5	GAGTGACCTAGATGATTACGAAAACTAGCAAAAATGCTGCTCGTCTTAAAA	-6	2.43	rplR_CDS
143110	+	32.06	GCGCCTGAACGTTTTCCGTTCTAACAAGCACATTTACGCTCAAATCATCGA	-6.2	0	rplR_CDS
143336	+	110.19	CGTGTAAAAGCTTTGGCTGATGCCGCTCGTGAAGCTGGACTTAAATTTTAA	-9.1	0	rplR_CDS
143362	+	20.56	TCGTGAAGCTGGACTTAAATTTTAATAAAAGAAGGAGGGACACATGATTAT	-6.2	0	rpsE_CDS
143385	+	29.69	AATAAAAGAAGGAGGGACACATGATTATGCGTCGTATTGACCCAAGCAAAT	-6.9	7.61	rpsE_CDS
143517	+	80.06	TAGTCGTTGTCGGTGACAAAAACGGACACGTAGGATTCGGTACTGGTAAAG	-8.2	0	rpsE_CDS
143549	+	16.31	GGATTCGGTACTGGTAAAGCACAAGAAGTACCAGAAGCGATTCGCAAAGCT	-11.3	0	rpsE_CDS
143570	+	73.38	CAAGAAGTACCAGAAGCGATTCGCAAAGCTGTTGAAGATGCGAAAAAGAAT	-6.4	0	rpsE_CDS
143880	+	73.63	GTGGAAAATCTGTAGAAGAACTGTTAGGATAAGGAGGGAACATTAATGGCT	-3.2	15.58	rpmD_CDS
143960	+	126.81	AATCGGTCGCCCGGAAGACCAACGCGTTACTGTAAGAACACTTGGTTTAAA	-10	0	rpmD_CDS
143976	+	41.25	GACCAACGCGTTACTGTAAGAACACTTGGTTTAAAGAAAACAAACCAAACT	-5.6	0	rpmD_CDS
143978	+	40.94	CCAACGCGTTACTGTAAGAACACTTGGTTTAAAGAAAACAAACCAAACTGT	-5.6	0	rpmD_CDS
143985	+	45.31	GTTACTGTAAGAACACTTGGTTTAAAGAAAACAAACCAAACTGTTGTTCAT	-8.6	0	rpmD_CDS
144019	+	116	ACCAAACTGTTGTTCATGAAGACAACGCTGCGATCCGTGGTATGATTAATA	-8.8	0	rpmD_CDS
144053	+	121.06	CCGTGGTATGATTAATAAAGTATCTCATTTAGTTTCTGTTAAAGAACAATA	-3.1	0	rpmD_CDS
144055	+	120.81	GTGGTATGATTAATAAAGTATCTCATTTAGTTTCTGTTAAAGAACAATAAA	-3.1	0	rpmD+1
144329	+	43.69	TTTCACTAACATCAACCGCAAGGAATACGCTGTAGTCAACCTAGACAAATT	-4.1	13.58	rplO_CDS
144383	+	81.44	CGGTTTTGCAGAAGGAACGGAAGTCACTCCTGAACTTCTTCTAGAGACTGG	-14.3	10.01	rplO_CDS
144434	+	186.75	TGTTATTAGCAAACTTAATGCAGGAGTAAAGATTCTTGGCAACGGTAAATT	-8	2.15	rplO_CDS
144528	+	51	GCGAAAGAAGCTGTTGAAGCTGCTGGCGGTACAGCTGAGGTGATCTAACTT	-13	0	secY_CDS
144556	+	325.19	GTACAGCTGAGGTGATCTAACTTGTTTAAAACAATCTCCAACTTTATGCGT	-6.3	0	secY_CDS
144576	+	138.69	CTTGTTTAAAACAATCTCCAACTTTATGCGTGTGAGTGATATCAGGAATAA	-3.2	2.56	secY_CDS
144578	+	138.44	TGTTTAAAACAATCTCCAACTTTATGCGTGTGAGTGATATCAGGAATAAAA	-2.4	0	secY_CDS
144698	+	36.13	CTGAAGCGTTACAGGCACAGTCTCAAATGGGTGTTTTTGATCTCCTTAATA	-5.6	2.18	secY_CDS
144852	+	809.5	ACCGAAGTTTACCGAGTGGTCTAAGCAAGGTGAAGTTGGCCGCCGTAAATT	-13.5	0	secY_CDS
144874	+	43.56	AAGCAAGGTGAAGTTGGCCGCCGTAAATTAGCTCAGTTCACAAGGTACTTT	-7.7	0	secY_CDS
144936	+	83.94	TGGTTTCATCCAAGCGTTAGGTATGTCATATGGATTCAACAATCTGGCAAA	-7.5	0	secY_CDS
144960	+	23.94	GTCATATGGATTCAACAATCTGGCAAACGGTATGCTGATCGAAAAATCCGG	-8.5	0	secY_CDS
145016	+	25.13	CGACATATCTTATCATTGCTTTAGTGCTCACTGGCGGAACTGCCTTTTTAA	-5.5	1.93	secY_CDS
145115	+	46.38	CGATCATTATCTTCGCGGGGATTGTGTCTAGTATTCCAAAAACAATTGGGC	-7.4	29.04	secY_CDS
145159	+	33.44	ATTGGGCAAATATATGAGACTCAATTTGTCGGCAGCAACGATCAGTTGTTT	-10.4	0	secY_CDS
145223	+	32.56	AAGTCGCACTTCTTGTGATTGCGATTTTAGCAGTTATTGTTGGAGTTATTT	-12	0	secY_CDS
145256	+	20.25	TTATTGTTGGAGTTATTTTCATTCAGCAAGCCGTACGGAAAATTGCGATTC	-8.1	0	secY_CDS
145295	+	30.88	AAATTGCGATTCAATATGCTAAAGGCACAGGTCGTTCACCTGCTGGCGGAG	-9.1	9.58	secY_CDS
145316	+	32.63	AAGGCACAGGTCGTTCACCTGCTGGCGGAGGTCAGTCTACACACCTTCCAT	-12.5	0	secY_CDS
145367	+	25.19	TGAAAGTGAATCCTGCAGGGGTTATTCCGGTAATCTTTGCGGTTGCGTTTT	-14.8	0	secY_CDS
145399	+	46.38	ATCTTTGCGGTTGCGTTTTTGATAACGCCGCGGACGATCGCGTCATTCTTT	-13.7	0	secY_CDS
145406	+	41.06	CGGTTGCGTTTTTGATAACGCCGCGGACGATCGCGTCATTCTTTGGAACAA	-12.2	0	secY_CDS
145410	+	42.63	TGCGTTTTTGATAACGCCGCGGACGATCGCGTCATTCTTTGGAACAAACGA	-12	0	secY_CDS
145475	+	13.81	TTCAAAACAACTTTGATAATACGCATCCGGTGGGTATGGCGATATATGTTG	-7.2	6.65	secY_CDS
145551	+	15.63	TTATGCTTTTGTACAGGTAAACCCTGAACAAATGGCTGATAACCTTAAAAA	-11.2	14.17	secY_CDS
145581	+	251.06	AATGGCTGATAACCTTAAAAAACAGGGTGGCTATATCCCGGGGGTTCGTCC	-11.1	3.19	secY_CDS
145608	+	46.25	TGGCTATATCCCGGGGGTTCGTCCAGGGAAAATGACTCAAGATAGAATTAC	-11.2	3.26	secY_CDS
145614	+	45.75	TATCCCGGGGGTTCGTCCAGGGAAAATGACTCAAGATAGAATTACGAGCAT	-13	3.32	secY_CDS
145631	+	48.5	CAGGGAAAATGACTCAAGATAGAATTACGAGCATTTTGTATCGACTTACGT	-6.4	1.73	secY_CDS
145812	+	19.38	AATGAAACAACTAGAAAGCCAGTTGGTGAAACGAAACTACCGTGGATTTAT	-4.9	0.81	secY_CDS
145815	+	19.06	GAAACAACTAGAAAGCCAGTTGGTGAAACGAAACTACCGTGGATTTATGAA	-4.9	0.64	secY_CDS
145852	+	1978.69	CGTGGATTTATGAAAAACTAGAGGAAATGGATTTATCCATTCCCTCTTAAT	-13	0	secY+30
145879	+	99.19	TGGATTTATCCATTCCCTCTTAATAAAGAGAGGACGGGGGAAATCCGAATG	-19.4	0	adk_CDS
145945	+	59.81	GGGCTTCCTGGTGCCGGTAAAGGCACACAGGGCGAACGAATTGTTGAGGAT	-17.7	0	adk_CDS
146083	+	37.5	ATTGATAAGGGAGAGCTCGTACCTGACGAAGTCACAATCGGAATTGTAAAA	-5.9	16.21	adk_CDS
146128	+	651.88	GTAAAAGAGAGACTTGGCAAAGATGATTGTGAAAGAGGTTTTCTTCTGGAC	-6.8	0	adk_CDS
146202	+	20.31	AGCCGAAGCTCTTGAAGAAATTCTTGAGGAATACGGCAAGCCGATTGATTA	-12.7	0	adk_CDS
146291	+	19.63	AACGTCTGACTGGACGCAGAATTTGCAGTGTTTGCGGCACAACCTATCATT	-8	0	adk_CDS
146326	+	70.38	GGCACAACCTATCATTTAGTCTTTAATCCGCCGAAAACGCCGGGTATTTGT	-6.5	0	adk_CDS
146362	+	43.06	ACGCCGGGTATTTGTGATAAAGACGGAGGCGAACTCTATCAACGGGCAGAT	-8.5	17.55	adk_CDS
146429	+	38.31	TCTCTAAACGGCTTGAGGTAAACATGAAGCAAACTCAGCCTTTACTCGATT	-9.1	0	adk_CDS
146528	+	21.38	TTCAAGACGTTTATGCAGATGTGAAGGATCTTCTTGGAGGATTAAAAAAAT	-8	0	mapA_CDS
146609	+	22.56	TATCATGCGGGAAGCAGGGCGAATCGTGGCTTTAACTCATGAAGAGTTAAA	-12.4	0	mapA_CDS
146617	+	22.44	GGGAAGCAGGGCGAATCGTGGCTTTAACTCATGAAGAGTTAAAAAAGCACA	-11.9	0	mapA_CDS
146644	+	101.31	CTCATGAAGAGTTAAAAAAGCACATTAAACCAGGAATCTCGACAAAAGAAT	-1.8	5.1	mapA_CDS
146668	+	29	TTAAACCAGGAATCTCGACAAAAGAATTGGATCAAATTGCCGAACGTTTTA	-2.2	0	mapA_CDS
146804	+	25.69	TCACGGCATACCTGGCAGCAGGGTGCTGAAGGACGGTGACATCATCAGTAT	-16.4	0	mapA_CDS
146821	+	38.38	GCAGGGTGCTGAAGGACGGTGACATCATCAGTATTGATATCGGTGCTAAAT	-9.5	0	mapA_CDS
146824	+	38.5	GGGTGCTGAAGGACGGTGACATCATCAGTATTGATATCGGTGCTAAATTAA	-9.5	0	mapA_CDS
146992	+	204.56	CAGGTGAACGTTTGTCGAATATTTCCCACGCAATACAAACGTATGTCGAAA	-6.2	0	mapA_CDS
147133	+	49.63	CCAACAAAGGACCACGGCTTAAACCTGGCATGGTTCTCGCTATTGAACCTA	-12	0	mapA_CDS
147161	+	42.63	CATGGTTCTCGCTATTGAACCTATGGTGAACGCTGGCAGCCGCTACGTGAA	-14.2	0	mapA_CDS
147219	+	156.44	GCTGATAACTGGACGGTTGTAACGGTAGATGGGAAAAAGTGTGCTCATTTT	-10.1	0	mapA_CDS
147343	+	14.06	AGACAGATGTTTTTCAAGCTTGATAGGGCAGAAAGCTTGGGTGAACATTGG	-14.2	2.62	ybzG_CDS
147394	+	259.06	CAAGACCGAATTCATCTTGCTTCTTGTCGTTGGAATTTTAACCATCATCAA	-4	0	ybzG_CDS
147417	+	43.13	TTGTCGTTGGAATTTTAACCATCATCAATGTACTAACAGCAGACGGAGAAA	-5.6	11.6	ybzG_CDS
147559	+	22.75	AACAGGGCGTGTGACAAACTTCTTTTGAAATTTGTCAGAAAGCAAGTTACT	-12.2	0	ybzG+23
147563	+	24.88	GGGCGTGTGACAAACTTCTTTTGAAATTTGTCAGAAAGCAAGTTACTGATT	-12.2	0	ybzG+27
147573	+	15.13	CAAACTTCTTTTGAAATTTGTCAGAAAGCAAGTTACTGATTTGAAGAAGGG	-8.9	14.39	ybzG+37
147576	+	15.31	ACTTCTTTTGAAATTTGTCAGAAAGCAAGTTACTGATTTGAAGAAGGGAGA	-10.3	12.43	ybzG+40
147585	+	19.44	GAAATTTGTCAGAAAGCAAGTTACTGATTTGAAGAAGGGAGAACACTTGAA	-4.4	2.52	infA_CDS
147604	+	41.94	GTTACTGATTTGAAGAAGGGAGAACACTTGAATGGCGAAAGACGATGTAAT	-0.9	2.61	infA_CDS
147654	+	41.63	TTGAAGTGGAAGGTACTATAGTCGAAACACTGCCAAACGCGATGTTCAAAG	-6.4	0	infA_CDS
147764	+	49.06	TTCATTCGCATTTTACCTGGAGACAAAGTTACGGTAGAATTATCTCCATAT	-6.3	0	infA_CDS
147840	+	13.69	ACCGTTACAAATAAAGCACTCCGGAAACTGAAGGAGGTTGGAAACACATGA	-6.8	0	rpmJ_CDS
147875	+	136.5	GGTTGGAAACACATGAAAGTGAGACCATCAGTTAAACCAATCTGCGAAAAA	-6.8	0	rpmJ_CDS
147902	+	54.88	TCAGTTAAACCAATCTGCGAAAAATGTAAAGTTATTCGCAGAAAAGGAAAA	-12.4	0	rpmJ_CDS
147942	+	81.44	GAAAAGGAAAAGTAATGGTGATCTGTGAAAATCCAAAGCATAAACAAAAAC	-3	13.59	rpmJ_CDS
148070	+	24.19	TATTTCTTTAACATACATCTTCGGAATTGGCCGCACAACGGCTCAGCAAGT	-7.5	0	rpsM_CDS
148281	+	41.25	CGCGGAATCCGTCATCGCAGAGGATTACCTGTTCGCGGACAAAACTCTAAA	-10.5	2.27	rpsM_CDS
148336	+	109.5	ACGCGCGTACTCGTAAAGGTCCGCGTCGTACTGTAGCTAACAAGAAAAAAT	-10.9	0	rpsM_CDS
148354	+	16.63	GTCCGCGTCGTACTGTAGCTAACAAGAAAAAATAAGTAAGGGAGGTTCTTA	-3.7	0.5	rpsM+16
148359	+	16.06	CGTCGTACTGTAGCTAACAAGAAAAAATAAGTAAGGGAGGTTCTTAAACAA	-2.9	22.14	rpsK_CDS
148445	+	34.38	CGCGTGAAAAAGAATATTGAGTCTGGAATTGCTCATATTCGTTCAACTTTC	-9.7	0	rpsK_CDS
148479	+	25.38	ATATTCGTTCAACTTTCAATAACACGATCGTTACGATCACTGACACTCATG	-4.2	20.88	rpsK_CDS
148556	+	12.06	GGAGCTTTAGGATTCAGAGGTTCTCGTAAATCTACTCCTTTTGCTGCGCAA	-9.8	0	rpsK_CDS
148587	+	38.5	CTACTCCTTTTGCTGCGCAAATGGCTGCAGAAACAGCTGCTAAAGGTTCAA	-10.2	1.11	rpsK_CDS
148756	+	29.81	TCCTGTTCCTCATAACGGATGCCGTCCACCAAAACGTCGCCGCGTGTAATT	-5.8	1.03	rpsK+2
148913	+	415.13	GGAATTTCGGATGGAATCTCATATGATTCTATTCGAGGTTTCGACGTTTTG	-23.2	5.29	rpsK+159
149085	+	50.13	TCTGGGTAACTCCTTACGTCGTATCCTCTTATCCTCACTCCCTGGTGCCGC	-7.4	0	rpoA_CDS
149089	+	48.81	GGTAACTCCTTACGTCGTATCCTCTTATCCTCACTCCCTGGTGCCGCTGTA	-3.7	0	rpoA_CDS
149103	+	91.69	TCGTATCCTCTTATCCTCACTCCCTGGTGCCGCTGTAACATCAATCCAGAT	-3.5	0	rpoA_CDS
149133	+	105.94	CGCTGTAACATCAATCCAGATAGATGGTGTACTGCACGAATTCTCGACAAT	-11.5	12.32	rpoA_CDS
149155	+	20.69	GATGGTGTACTGCACGAATTCTCGACAATTGAAGGCGTTGTGGAAGATGTT	-8.9	0	rpoA_CDS
149180	+	15.25	CAATTGAAGGCGTTGTGGAAGATGTTACAACGATTATCTTACACATTAAAA	-8.1	7.09	rpoA_CDS
149230	+	13.56	AAGCTTGCATTGAAAATCTACTCTGATGAAGAGAAGACGCTAGAAATTGAT	-5.8	6.92	rpoA_CDS
149292	+	42.13	AGGAACTGTAACGGCAGCTGATATTACACACGATAGTGATGTAGAGATCTT	-10.5	0	rpoA_CDS
149322	+	26.75	CGATAGTGATGTAGAGATCTTAAATCCTGATCTTCATATCGCGACTCTTGG	-14.6	0	rpoA_CDS
149326	+	25.38	AGTGATGTAGAGATCTTAAATCCTGATCTTCATATCGCGACTCTTGGTGAG	-16	0	rpoA_CDS
149393	+	39.63	TTCGCCTTACTGCTCAAAGAGGACGTGGGTATACGCCTGCTGACGCAAACA	-11.5	9.36	rpoA_CDS
149501	+	127.25	CTCGTGTATCTTATCAGGTAGAGAACACTCGTGTAGGCCAAGTTGCAAACT	-8	0	rpoA_CDS
149555	+	28.56	ATAAACTTACACTTGATGTTTGGACTGATGGAAGCACTGGACCGAAAGAAG	-5.4	5.18	rpoA_CDS
149559	+	27.31	ACTTACACTTGATGTTTGGACTGATGGAAGCACTGGACCGAAAGAAGCAAT	-6	5.66	rpoA_CDS
149576	+	55.75	GGACTGATGGAAGCACTGGACCGAAAGAAGCAATTGCGCTTGGTTCAAAGA	-9.7	0.23	rpoA_CDS
149583	+	47.88	TGGAAGCACTGGACCGAAAGAAGCAATTGCGCTTGGTTCAAAGATTTTAAC	-10.1	44.77	rpoA_CDS
149628	+	30.13	TTTAACTGAACACCTTAATATATTCGTTGGTTTAACTGACGAAGCTCAACA	-7.6	0	rpoA_CDS
149681	+	19.25	CTGAAATCATGGTTGAAAAAGAAGAAGATCAAAAAGAGAAAGTTCTTGAAA	-3.6	0	rpoA_CDS
149778	+	35.88	AAAGCGTGCGGGTATTAACACGGTTCAAGAGCTTGCGAACAAGACGGAAGA	-7	35.14	rpoA_CDS
149907	+	159.56	ACTTCGCAAAGACGATTGACTAGTTTCCCTTGTGAACTAGGATTTTCGTGT	-9.5	0	rpoA+32
149965	+	29.69	ATTCAGAAACAGCATTCCAATAAAGGAGGGGACATCACATGTCATACAGAA	-6.3	21.73	rplQ_CDS
150018	+	134.5	CTAGGACGTACGAGTGCACAGCGTAAAGCTATGCTTCGTGATCTTACAACT	-15.5	0	rplQ_CDS
150182	+	261.44	TCAAGCTGCTGCATACATCCGCAACGAGGTTGCAAACGAAGAAAATAATCA	-6.5	10.2	rplQ_CDS
150323	+	83.19	CCGTGGTGACGGAGCACCAATGGCAATTATCGAATTGGTTTAATCACATAT	-11.6	7.88	rplQ+8
150381	+	2095.13	TATCTAAAGAAGGGCGGGACAGTTTCTAACTGGATCTATGCCCTTTTTTTA	-17.4	45.59	rplQ+66
150600	+	12.63	ATGGCTTGCAATCGTAGGTCATAACGGTTCAGGGAAATCAACACTGGCCCG	-16.1	23.08	cbiO_CDS
150858	+	22.13	AGTAGACTGGGCAGTAAAACAGGTGAATATGCAAGATTTTCTCGATCAAGA	-2.7	3.56	cbiO_CDS
153157	+	13.13	CGCAGCCGGACAGGTGATTCATTTTGACACTCCGCTGTCTATCCCGGCTGA	-16.9	0	truA_CDS
153309	+	44.06	AAAAAGAATATCGCTACTTTGTATACACGGAGAAACACCCGGACGTATTTA	-4.2	0	truA_CDS
153917	+	43.75	CAAGTACTATTGAACGCAAGTGGTTAGTTGTTGATGCTGCTGGCAAGACTT	-7.7	0	rplM_CDS
153936	+	32.88	GTGGTTAGTTGTTGATGCTGCTGGCAAGACTTTAGGTCGTCTTTCTTCAGA	-11	0	rplM_CDS
153966	+	33.63	TTTAGGTCGTCTTTCTTCAGAAGTTGCAGCTATCCTTCGCGGAAAACACAA	-5.4	0	rplM_CDS
153993	+	40	AGCTATCCTTCGCGGAAAACACAAACCAACTTACACACCACACGTTGATAC	-3	0	rplM_CDS
154100	+	62.06	TAACTGACAAAATCTACTACCGTCACACTCAACATCCAGGCGGATTAAAAT	-5.4	0	rplM_CDS
154117	+	26.38	TACCGTCACACTCAACATCCAGGCGGATTAAAATCAAGAACTGCTCTTGAA	-10.4	18.36	rplM_CDS
154142	+	61.38	GATTAAAATCAAGAACTGCTCTTGAAATGCGTACAAACTACCCTGAGAAAA	-5	0	rplM_CDS
154284	+	101	TCCACACGAAGCACAAAAACCTGAAGTTTACGAACTTCGCGGTTAATTAAA	-9.7	17.05	rplM+5
154398	+	32.88	GCGCGTGTGCGTTTAGTTCCAGGAGAAGGCCGTATCGTCGTTAATAATCGT	-7.5	0	rpsI_CDS
154422	+	51.44	GAAGGCCGTATCGTCGTTAATAATCGTGAAATCAGCGAACATATCCCATCT	-5	17.81	rpsI_CDS
154428	+	48.69	CGTATCGTCGTTAATAATCGTGAAATCAGCGAACATATCCCATCTGCAGCT	-3	11.01	rpsI_CDS
154442	+	46.69	TAATCGTGAAATCAGCGAACATATCCCATCTGCAGCTTTAATCGAAGATAT	-3	8.76	rpsI_CDS
154452	+	51.38	ATCAGCGAACATATCCCATCTGCAGCTTTAATCGAAGATATCAAACAACCA	-1	8.39	rpsI_CDS
154481	+	11.81	AATCGAAGATATCAAACAACCATTAACTTTGACTGAAACAGCTGGCACTTA	-3.2	7.07	rpsI_CDS
154561	+	29.13	GCCTATCTGGTCAAGCTGGAGCAATCCGTCACGGTATCGCTCGTGCTTTGC	-16.9	0	rpsI_CDS
154590	+	50.56	CACGGTATCGCTCGTGCTTTGCTTGAAGCAGATCCAGAATACCGTACAACT	-14.4	4.21	rpsI_CDS
154740	+	634	TAATTTTACGTTTTCAAAAAGCTCTCGACCTTGGGTTGGGAGCTTTTTTCT	-20.1	66.47	rpsI+48
155952	+	142.38	AACAAGAAGCGTGAAAGTATGAAAAGCAGCGACCTGTTAGAGGGGCTGCTT	-13.9	80	ybaJ+29
157713	+	10.56	GCCTGAAGAAACGGTTGCTAAATTCCGGGCGCCGTCAGCTGAGAAAAAAAC	-11	0	salA_CDS
157852	+	18.13	GCTATTTCTCTGGCTCGTCTAGGGAAAAAGGTTGGTTTAATTGATGCGGAT	-10.8	0	salA_CDS
158039	+	12.75	TCGTATGGAGAGGGCCGATGCTCGGCAAAATGCTGAATAATTTTTTCCATG	-12.8	0	salA_CDS
158253	+	10.88	GATTAAAACCGATCATGAGGTCGTGGGTGTCATAGAGAACATGGCTTATTA	-9.2	0	salA_CDS
158518	+	899.38	GTGCAGGTATAAAAGGTGAACCGGGATTCCAGATCCCGGCTTTCCCTTTAT	-18.4	21.41	salA+39
158829	+	12.13	AGCAAAATCAGTGTCTTCAAAGATGTTTTTCCAAAATTCTTCACCTTTTTT	-1	0	salA+350
160116	+	26.94	ATTGGCCGGTAGGGGGTCTTAATAGCTGTATGTCTTTGACCCCTAACTTTT	-14.5	3.09	kbaA+338
160817	+	312.69	ATGTTATAGTAATAAAGCTGCTTCGTTAAGCGGCAGTAATGATCTTTGAAA	-9.4	49.41	kbaA+1039
160893	+	21.94	TAATTCATTTTTATAAATCGCACAGCGATGTGCGTAGTCAGTCAAACTACT	-10.4	23.81	kbaA+1115
162511	+	245.13	ATATAAGACCTTGGGTCTTATAAACAGAACGTTCCCTGTCTTGTTTAGTTT	-13.6	42.86	kbaA+2733
162611	+	34.56	GACATCACATTCAAGTAATACAAGATATCACATAGTGATTCTTTTTAACGG	-5	48.57	kbaA+2833
162772	+	14.06	TCCGAATGGGGAAACCCACCACTCGTAATGGAGTGGTATCCATATCTGAAT	-16.6	21.95	kbaA+2994
165590	-	10.25	TCCGTGTTCGGTATGGGAACGGGTGTGACCTCTTCGCTATCGCCACCAAAC	-11.5	100	ybbA+14005
165706	+	12.81	CGCCGATGGTAGTCGGGGGTTTCCCCCTGTGAGAGTAGGACGCCGCCAAGC	-15.1	0	kbaA+5928
165865	+	88.88	TACCTGCGGAGCATTGCTTCCATAGCTCAGCAGGTAGAGCACTTCCATGGT	-17.8	5.9	kbaA+6087
165903	+	1840.88	GCACTTCCATGGTAAGGAAGAGGTCAGCGGTTCGAGCCCGCTTGGAAGCTT	-14.1	16.56	kbaA+6125
165946	+	353.38	GGAAGCTTAAATGTATTATTACCAAGGTTTCTCATAAGGAGAAAGCTTTTT	-10.4	17.01	kbaA+6168
166033	+	5575.75	ACCACCTTGCCAAGGTGGGGGTCGCGGGTTCGAATCCCGTCTTCCGCTCCA	-20.3	21.68	kbaA+6255
166141	+	536.06	TTTGACTACGGATCAAAAGGTTAGGGGTTCGACTCCTCTCGGGCGCGCCAT	-9.9	6.06	kbaA+6363
166238	+	152.25	TAGAGCACATGGTTTGGGACCATGGGGTCGCAGGTTCGAATCCTGTCTTCC	-16.8	5.25	kbaA+6460
166329	+	6692.25	CCTGCTTTGCACGCAGGAGGTCAGCGGTTCGATCCCGCTAGGCTCCACCAA	-19.3	58.21	kbaA+6551
166423	+	266.63	ATACTAATAAAGTTGCTTTAACAAAGCGGACAAACAAAATGATCTTTGAAA	-4.7	36.74	kbaA+6645
166451	+	19.31	GACAAACAAAATGATCTTTGAAAACTAAACAAGACAAAACGTACCTGTTAA	-0.9	19.69	kbaA+6673
166494	+	40.88	CCTGTTAATTCAGTTTTTAAAAATCGCACAGCGATGTGCGTAGTCAGTCAA	-9.9	36.59	kbaA+6716
166501	+	42.69	ATTCAGTTTTTAAAAATCGCACAGCGATGTGCGTAGTCAGTCAAACTACTT	-10.4	37.68	kbaA+6723
166511	+	36.25	TAAAAATCGCACAGCGATGTGCGTAGTCAGTCAAACTACTTTATCGGAGAG	-10.4	46.81	kbaA+6733
168119	+	281.81	ATATAAGACCTTGGGTCTTATAAACAGAACGTTCCCTGTCTTGTTTAGTTT	-13.6	61.54	kbaA+8341
168219	+	28.56	GACATCACATTCAAGTAATACAAGATATCACATAGTGATTCTTTTTAACGG	-5	36.36	kbaA+8441
171139	+	19.69	AGTGTGGCGACACATGGAGCTGACAGATACTAATCGATCGAGGACTTAACC	-8.8	100	kbaA+11361
171312	+	15.13	CGCCGATGGTAGTCGGGGGTTTCCCCCTGTGAGAGTAGGACGCCGCCAAGC	-15.1	94.74	kbaA+11534
171421	+	159.25	ATACTAATAAAGTTGCTTTAACAAAGCGGACAAACAAAATGATCTTTGAAA	-4.7	35.52	kbaA+11643
171450	+	32.81	ACAAACAAAATGATCTTTGAAAACTAAACAAGACAAAACGTACCTGTTAAT	-0.9	13.16	kbaA+11672
171477	+	19.44	ACAAGACAAAACGTACCTGTTAATTCAGTTTTTAAAAATCGCACAGCGATG	-5.9	13.04	kbaA+11699
173115	+	276	ATATAAGACCTTGGGTCTTATAAACAGAACGTTCCCTGTCTTGTTTAGTTT	-13.6	72.73	kbaA+13337
173215	+	33.31	GACATCACATTCAAGTAATACAAGATATCACATAGTGATTCTTTTTAACGG	-5	32.43	kbaA+13437
173376	+	11.06	TCCGAATGGGGAAACCCACCACTCGTAATGGAGTGGTATCCATATCTGAAT	-16.6	12.77	kbaA+13598
176139	+	12.5	AGTGTGGCGACACATGGAGCTGACAGATACTAATCGATCGAGGACTTAACC	-8.8	100	kbaA+16361
176196	-	13.88	TCCGTGTTCGGTATGGGAACGGGTGTGACCTCTTCGCTATCGCCACCAAAC	-11.5	100	ybbA+3399
176312	+	16.81	CGCCGATGGTAGTCGGGGGTTTCCCCCTGTGAGAGTAGGACGCCGCCAAGC	-15.1	0	kbaA+16534
178559	+	53.19	AGATGGCATAAAATAGAGAAGCCCAGATGAATGAGATCTGGGCTTTTTTAT	-22.2	57.5	ybaR+40
179306	+	13.94	AACAGTTCAGCGATTGCTCCTTATTTCAAATCCATTGATTTGAGATTTGCA	-10.3	0	ybaS_CDS
179619	+	67.88	TGTTGCAGAAGGCATAAAAAAACCGCTCATAGGGTTGAGCGGTTTTTTCCG	-19.9	70	ybaS+34
182127	-	32.56	CGGATTCCAAGGGCTGCCGGCGCTCTGCTCATAGGGGCAGCCCTTGCTGTT	-23.1	0.91	feuB_CDS
194279	+	21837.5	CACCGCCCTTTCACGGCGGTAACACGGGTTCGAATCCCGTACGGGTCACCA	-19	31.62	ybaS+14694
194359	+	4317.69	TCTGCCTTACAAGCAGAGGGTCGGCGGTTCGAGCCCGTCATCCTCCACCAT	-16.1	35.51	ybaS+14774
194445	+	623.31	TTGTAATCAGTAGGTTGGGGGTTCAAGTCCTCTTGCCGGCACTGTTTTTTC	-13	19.07	ybaS+14860
194543	+	14460.8	TAAATCCGCTCCCTCAGGGTTCGGCAGTTCGAATCTGCCCCCCTCCACCAT	-13	46.87	ybaS+14958
194619	+	341.94	GCAACGGACTTTGACTCCGTCATGCGTTGGTTCGAATCCAGCTAGCCCAGT	-12.7	27.67	ybaS+15034
194654	+	1882.13	ATCCAGCTAGCCCAGTCACAGACACCTTTGATCAAAAGGTGTCTTTTTTCT	-14.1	93.39	ybaS+15069
195057	+	23.94	CATCAGAGCGTACGTTAATATCGACAGTTTTGATATTAACCGGAAATTTTC	-9.9	0	sigW_CDS
195740	+	34.75	GTTATCGCAGCTGCTGCGGTATTCATCATTTTGATGGGCGGGGGTTTTTTT	-14.4	0	rsiW_CDS
196081	+	563	CAATCCGAACGGAGAAGAGTAAAGCGCGTTAGCCGCTTTGCTCTTTTTTTG	-22.1	57.62	rsiW+29
196725	+	18.94	AGCTCTGAGCTGCTGATCAATATTTTTATTCCAAACACCCCGCTTCATGAC	-2.3	14.56	ybbP_CDS
196772	+	11	TGACGGTGCGGTAATTATGAAAAATAATGAAATTGCCGCGGCCGCCTGTTA	-16.4	3.9	ybbP_CDS
197533	+	20.81	AGCAAGATGAAAAAAGGCTATTCTCCGGAGCAGCCGATTGTCAGTCCGAAA	-11	0.08	ybbR_CDS
197771	+	17.06	GCCCGAGTAAAAAAGTGCCCTTTAAAATTGAACGGACAGGAAGCCTTCCTG	-8.6	0.33	ybbR_CDS
197853	+	53.38	CCCCAGTGAGGTAACGGTTTACGGCTCACAGGATGTGTTGGATTCTCTTGA	-8.9	1.19	ybbR_CDS
197881	+	10.13	CAGGATGTGTTGGATTCTCTTGAATTTATTGACGGCGTCAGCCTAGATTTA	-9.4	0	ybbR_CDS
198132	+	14.31	AGATGTAACGGCTAAAGGCTCTCCCACGAATATAAATAAACTGAAAAAATC	-1.8	0	ybbR_CDS
199982	+	261.56	TGACCGTTTATGCCACATGTTGTAAAATCAAGCTTGTCTTGTTCTTATTTT	-2.3	9.29	glmM+139
200028	+	10.31	ATTTTCTCAATAGGAAAAGAAGACGGGATTATTGCTTTACCTATAATTATA	-5.4	3.73	glmM+185
200197	+	38	AAGGGGGTGACTCCTTGAACAAAGAGAAATCACATGATCTTCCAAAAAACA	-7.8	0	glmM+354
200232	+	131.44	GATCTTCCAAAAAACATGTAGGAGGGGACGATTGAAAGTCCCCTTGAAATT	-15	0	glmM+389
200261	+	98.19	GATTGAAAGTCCCCTTGAAATTTGACTTTCTTCGTCTCCTTTTACAATCTT	-7	0	glmM+418
200324	+	15.69	AATATGTGTGGAATCGTAGGTTATATCGGTCAGCTTGATGCGAAGGAAATT	-3.5	0.41	glmS_CDS
201051	+	21.75	ATATCGAAAAAGGCACGTACCCTCACTACATGTTGAAAGAAACGGATGAGC	-5.2	17.69	glmS_CDS
201208	+	19.44	TATCATTGGCTGCGGAACAAGCTACCATGCAGGACTTGTCGGTAAACAATA	-12.4	0	glmS_CDS
201622	+	10.56	CGGTATCGCTGCAAACGCAATGGAAGCTCTATGCGACCAGAAAGACGAAAT	-9	0	glmS_CDS
201868	+	11.5	ACTGGCAACTCAAGAGCATGTAAACCTAAGCATCCGCGGAAACGTCAAAGA	-3.9	0.86	glmS_CDS
202084	-	18	TTTGGACATAAAAACACCCCTTTAGATAATCTTATCCAAAGGGGTTAAACA	-14.6	26.67	alkA+463
202085	+	14.81	GTGGATAAACCTCGTAACCTTGCGAAGAGTGTTACTGTGGAGTAATAAATG	-9.3	18.86	glmS+6
202103	+	33.88	CTTGCGAAGAGTGTTACTGTGGAGTAATAAATGTTTAACCCCTTTGGATAA	-6.1	5.38	glmS+24
202126	+	1626.44	GTAATAAATGTTTAACCCCTTTGGATAAGATTATCTAAAGGGGTGTTTTTA	-19.4	95.88	glmS+47
205132	+	12.88	ATGAAAAAGTATCCTAATAAAAAAGGAAGAGAACATGAGTCGATTTATTTG	-3.1	0	adaB+242
205300	+	584.06	ATTCAATGATCTAACATAATCATTGAAATTTTGAAGTTGTCGGCTTTTTTG	-9.4	98.8	adaB+410
211157	+	24.13	TTCCTGTCGAAAGATCTAACATCCGCTGTTGTTATGAGCGGATGTTTTTTT	-15.5	8.33	ybcI+211
211722	+	10.31	TATAAAAGAGATGAAGAAGCCATTGGGAAACTTGCTGACTTTCTTAAAACA	-5	73.88	ybzH_CDS
211761	+	201	TTTCTTAAAACAGAGATATAAAAATAAACATCAAAAGATGTTTATTTTTAC	-14.1	99.09	ybzH+30
212991	+	30.88	TGGTGCGTTAGGGGTTATGATTGCAATTATTGCATCATTGCTGATTTTCAA	-9.6	40.54	ybcL_CDS
213079	+	10.69	TAATTTCGAAAGTTCTAACATCCGCTCGTTATACAAGCGGGTGTTTTTTTT	-14.8	60	ybcL+48
214159	+	77.88	CATTTGAGAATAGGGAGTTGAGCGTATTTGCTTATACTCCTTATTTTCTCT	-23.2	57.14	skfA+51
223220	+	150.5	CAGTTAATCCAAAAAAAGTTCTTGTTCCGCTTTTGGGACAAGGGTTTTTTT	-15.1	75.68	ybzI_CDS
224043	-	16.31	CGTGACAAAGCAGTTTTAACTTATACCGAGCCGGTTATCCGGCTCTTTTTT	-14.3	81.82	ybdN+32
227992	+	47.31	AGCAGCTGAATAACGATAAAAAAGAGACATTCACGGATGTCTCTTTTTTTA	-14.8	100	ybxG+38
231634	+	22.88	ACACGGTTCGTTTATCGGTTTTATTGCGGGCTGGGCCAACTGGATTGCGAT	-10.4	0	ybeC_CDS
231941	+	18.69	GTCGGATTCCACGGAGAAAACTTTACTGGCGGTCAAAGCATTGCGCCGAAT	-8.1	0	ybeC_CDS
232384	+	16.19	GAGTATATTCGGGAAGCTTCATCCGATTTACGGCGTTCCGCGACAAGCAAT	-10.4	0	ybeC_CDS
232970	+	19.81	TCTCAGCTGCTTAATGGACAGTCAGAAGCTGCTGCCGGAAAAGAATAAAAT	-10.8	17.74	ybeC+3
232975	-	447.31	AAGGGTTATTAAAAGCAAAAAACCTTGCGACAACTATCGCAAGGTTTTCTT	-16.4	99.15	glpQ+39
233012	+	678.81	GAATAAAATATAGAAGAAAACCTTGCGATAGTTGTCGCAAGGTTTTTTGCT	-20.1	99.41	ybeC+45
234585	-	14.81	TTTAAAAATCAGGAAAAAGAATTAACAACAAAAGAAATTCTTTTTCAATAT	-8.9	6.5	glpT_CDS
235352	-	24.44	CTGGCTCTTTTTGTTTTTCGGGAAAGGAGGCACGCCACACATCCAGCACAA	-10.5	4.81	ybfE+2812
235390	-	435.31	GAGCCAGGAATCCAACCCCTTTTGACAAGGGGTGTTTTCTGGCTCTTTTTG	-26.8	5.08	ybfE+2774
238138	-	160.44	ATACAAAAAAAGCATCTCTGAATAATCTCGAAATCAGAGATGCTTTCCCTT	-17.8	64.91	ybfE+26
239589	-	59.19	AATACAAAACTGCATGAACATAAGTTAAAATATGCTCATGCAGTTTTTTTA	-18.4	0	ybfG+55
241900	-	19.75	GCTGTTGGAGAACGGATGTAAAATGGATGCTTAACGGCATCCATTTTTTTA	-18.6	16.67	ybfH+17
245087	+	162.75	TTTAAAATAGAGTTTGAACAGGTCTTGTCATGGGACAAGGCCTGTTTTTTT	-21.4	98.59	purT+41
246525	+	36.5	TTAGTCTTCAAAGAATAGCAGTTTCCTTGATTTTAAGGGAACTGCCTTTTT	-17.5	50	ybfJ+33
246899	+	11.13	TTTCAGCTCTGCGATGTGGTATCCGAATATCGCAGCGTGGAGCAGTCAATT	-21	0	ybfK_CDS
248390	+	11.25	GTAGGATTGCCGATTCCAGATGAAGTGATGATGACCGTTGTTGGCTATTTC	-7.3	5.61	ybfM_CDS
248458	+	17.5	GAATTATGAGCTTTCGATATTGATTAGTTTTGTCGGGGCTTTGTTAGGTAT	-9.5	0	ybfM_CDS
249578	+	240.19	TTACGAAGAATAAAAAGAGGAGCTTGCATAAACGCAGCGCCTCTTTTTTTG	-17.3	34.98	psd+38
249902	+	52.81	GGTGATGAGAGAATCCAGCTAAAGCTTCTTTCAACAGAGAAGCTTTTTTTT	-13.4	91.43	ybfN+29
253516	+	72.94	ACGCTGCTGCTGAATAAAAAAAGAACACCTCGTATTGAGGTGTTCTTTTTT	-21.1	100	ybfQ+34
254875	-	76.56	GCACATTCAAATGAAGTAAAAAAGTCCCCCCTGCTGCGGGGGACTTTTTCG	-20.3	96.3	nagP+32
258842	+	81.94	TTGTTTAGCGCTCTAAATCAAACAGCCAGAATAAAACTGGCTGTTTTCTTT	-17.5	84.78	ybgB+35
261577	-	27.75	TTAAAGCCGGTTCGCCGGAGTCTCGTGTCACTTTCTGACATGAGATTTTTT	-21.9	17.74	mmuM+79
267695	+	49	GAAACAAAGAAGGATATAAACCAAACAGCCGGCTGACCAGGCTGTTTTTTT	-13	90	glnL+32
273981	+	88.19	AAAAATAATGGTGAGCAACCGCAGTTGAAACGTAAGAGCTGCGGTTTTTTT	-14.6	50.79	ycbG+43
275780	+	16.25	AGCCCTTATATGGTTATCAAAAAAGAGGGTGGCGTGCCTGCCCTTTTTTGT	-14.6	0	garD+219
277082	+	172.38	AAGGTGGTACCGCGAGACCCTCGTCCTTTGCATAGGACGGGGGTTTTTTGT	-25.3	74.44	ycbJ+324
278341	+	25.94	ACACACACGTTTTTCAATTACAATAAGTGTAATTACGTGTGTGTTTTTTGA	-17.4	0	ycbK+61
281769	+	57.5	AGGCGCCCAATATGTATAAAAGGCCGATGCTGTCAGCACCGGCCTTTCCAT	-17	67.57	ycbO+55
283782	+	27.75	TAACTGATAAAGAGCACTGAGTCATTCTGCGAAATGGCTCGGTGTTTTTGT	-21.7	83.33	ycbR+48
285990	-	21	AGCCCTCCCTTTCATAAAAAAAGAGGCAGACCCGGTGTCTGCCTCATCAGC	-16.8	52.94	pcp+783
288614	-	39.19	GTAGATCATTAATATGAAAAGCCCCTGACTAGTGTTCAGGGGCTTTTTCAT	-22.4	100	lmrB+39
288652	+	29.19	CCACAAGTAAACATGAAAAAGCCCCTGAACACTAGTCAGGGGCTTTTCATA	-22.4	81.25	ycbU+41
290136	-	17.88	CAGTACGCCGCTCCTTCATATCTCCAGCTGCATTCCTGACCTGCTGAAGAG	-6.4	5.45	lmrA_CDS
292887	+	90.94	GAATTAATGAAAAACAAAACCTTGAAGAATGCTATTCTTCAAGGTTATTCT	-15.9	60.18	estA+44
294576	-	70.69	TTTCAGAAATAAAAAAACCTTGAAAAGCCTGGCTTTTCAAGGTTTTTTCCA	-20.5	100	natK+39
294618	+	268.81	CCTCATAATGGAAAAAACCTTGAAAAGCCAGGCTTTTCAAGGTTTTTTTAT	-22.2	98.48	yccF+43
298367	+	25.25	TTCTTCCAAAATAAACTTGCGAAAGGAGAAATACACTTTCTCCTTTTTGTA	-13.5	22.22	natB+37
304597	-	13.63	CTGTCTTTCACCGGCATCAGCTTATCAAGCATGATTCGATGCCGGAATTCC	-15.4	63.64	yceB+6283
305587	+	125.44	CAGCGTTTTCAATAGGAAATGGCAGAGAACTACAGGTTCTCTGCTTTTTTT	-20.4	92.98	rapJ+36
307854	-	26.19	GCTCCCTTTCATGAGGTCAGCGTACTGCTTTCTCAGGCTGATCAGCTTTTT	-10.7	48.72	yceB+3026
309077	+	16.75	TTCACCTGACCAAGAACCGAGCGCAGCCAGCTTGGCAAAGCTGAAAACATA	-9	0.24	adcA_CDS
309279	+	26.06	TATATCGACATTATGAAACAAAACCTCGATGCCCTGAAAGATTCACTATTG	-2.8	30.8	adcA_CDS
309327	+	582.44	TTGGTTAAATCATAAGATAGTGTGCGCCGGAGGGGTGCACACTATTTCTTT	-22.5	58.47	adcA+36
310002	+	13.5	GCAATTTTTAGATAAAGTGATTCGATTAGAGAGAGGAGAAAAAGGCGGATG	-1.7	19.77	adcB_CDS
310153	+	13.19	AGGCCTTAATGGCTGACACACTTTCACATATCTCATTGTCAGGTGTTGCCA	-12.1	0.87	adcB_CDS
310843	-	19.25	AATTGTTTCTATAAAAAAAGCAGTTTTCCCTAGGGAAAACTGCTTTTCATG	-19.9	100	yceB+37
310882	+	37.81	GAAGCCGATAACATGAAAAGCAGTTTTCCCTAGGGAAAACTGCTTTTTTTA	-20.6	100	adcB+40
313644	+	74.25	CTTGAACATCCGAGCGGCGGTGTCATCCATACGGGTGACAACCGCACGGGT	-25	0	yceE_CDS
314053	+	10.06	TCAAATTATAGGAGGAAAAAACTTGGACTTTTTACATCATATTTTGTCTAC	-3.7	1.92	yceF_CDS
314230	+	37.44	GGTCATGGTTAAACACCTGCCGGAAAAACAGCGGAAAAAAGCGTTAACGTA	-7.4	0	yceF_CDS
314839	+	1258.38	AGAAGAATAAAACAAAACAAGGAGGGAGGTTCAATGTCCTTCCTTTTTTGT	-17.2	48	yceF+41
317641	+	344.94	ATTGCAGCAATAATAAAAACCCCGCTTGTGGAACATAAGCGGGGTATTTCA	-20.5	86.32	yceH+38
318960	+	16.44	CAAACTGAGCTAGAATAGGAAAAGCACCTCTTAAAAGAGGTGCTTTCAGCG	-17.6	12	yceI+33
319181	+	30.31	GAAAAGATTTTGTCAACAATCTGAGGCACCTCTTGAATGAGGTGCTTTTTT	-18.3	44	yceI+254
320405	-	271.88	AAACATACCTGCCTGGCTTTTTGGAAACCCTCTAACAAAGGGTTTTCTCTA	-11.7	97.76	yceK+16
321203	+	25.69	TGGGGTTAATCAGGCAGATTTTGAAGTATATGATGGTGAGATATTTGTCAT	-6.1	0.58	opuAA_CDS
322432	+	11.19	TTTGTAAATGGAATTGTCACCGGTCTTGGATTTATTCCATCTATTTTGTTA	-8.2	3.41	opuAB_CDS
324036	+	149	GATTTGAAGAAGTAATCAAAAAAGCAGCCTGTGTCAGGCTGCTTTTTTTGC	-20.4	96.67	opuAC+36
326808	+	35.94	TGGGGGCCGTTTTAACGATTGCTGCCCGCCGGCTTGTACGGCGGGCTTTTG	-21.4	73.33	ycgA+36
327437	-	19.19	ATTATCACAATCACTCTATCAAAACAACTTGGCAGAGTGAATACAAATCAA	-11.3	0.91	mdr+5004
327517	-	252.56	TCCCTCTTACTTCATTCTTCCGCTTCCTCCTTTCAAACCGATGTGAAGACT	-5.3	15.16	mdr+4924
327541	-	197.5	GAAGACTTACTTCGGAGTCAAAAATCCCTCTTACTTCATTCTTCCGCTTCC	-5.3	15.48	mdr+4900
327597	-	46.69	TAAAGAGGTTTTGAATCGTTTTGCAAACATTCTTGACACTCCTTATTTGAT	-8.2	2	mdr+4844
327691	-	147	GCTCATTCGATTTGTTCGCCGTTTCAGCACTCGCAGCCGCCGGTCCTGCCA	-6.2	6.18	mdr+4750
327828	-	112.13	CTTTACTTGGTTAATCGGAGATGTCTGAATGGCTGTATATCCTGCATCATG	-8.5	3.89	mdr+4613
327854	-	42	ATGCTTTTATCTCCTTGATTCCCTTCCTTTACTTGGTTAATCGGAGATGTC	-9.8	1.77	mdr+4587
327896	-	1222.06	ATTTGATACGATGTCGGCTGATACAGCCAGTACCAGTTCGACATGCTTTTA	-13.8	10.83	mdr+4545
329654	+	42.31	GGCTAGACGGGACTTACCGAAAGAAACCATCAATGATGGTTTCTTTTTTGT	-18.5	67.65	amyE+57
332397	-	193.63	AAATTAACATAAAAAAAGCAGTACATGCTGGGCATGTACTGCTTTTTTCTA	-23.4	96.15	mdr+44
333603	-	12.13	TCAAGGGATCGGAGGCGGCGCGCTCCTGCCGATTGCCTTTACCATTATCTT	-15	1.23	mdr_CDS
333735	-	22.06	GATTTACGGCAAGCTTTCCGATATGTACGGCCGAAAACGTTTTTTCCTGTT	-5.5	9.12	mdr_CDS
333763	-	11	ATATGGTGGCGGTTATGGCTGGCATGCCGATTTACGGCAAGCTTTCCGATA	-14	0	mdr_CDS
333810	-	10.75	AGCCGATCTTGGAAGCTTCGATAAATTTGCCTGGGTGACGGCATCCTATAT	-8.9	3.75	mdr_CDS
333943	-	19.25	AGGAGGTAGAACAAATGGACACAACAACAGCAAAACAGGCTTCCACCAAAT	-7.4	0	mdr_CDS
336131	+	84.56	AATGAAATAAATCAAGGACTGGCAGGGCGATCTTTATGACCCTGCTTTTTT	-12.1	64	ycgG+41
339109	-	32.44	ATAAAGCTTCTGTACACGACAAAAGCCCGCTCCGAGAGCGGGCTTTCTTCA	-20.8	93.75	tmrB+47
339143	+	388.63	ACTGGTGGAAATAAGTTGAAGAAAGCCCGCTCTCGGAGCGGGCTTTTGTCG	-23.6	93.05	nadE+37
340581	-	10.63	ACAAGGGATAAAACGATAAAAAAAGCCGTGCGCTGCGCACGGCTTTTTACA	-20	100	ycgJ+32
340615	+	30.38	GATCTTTATCAGCCGATGTAAAAAGCCGTGCGCAGCGCACGGCTTTTTTTA	-21.7	95.65	aroK+30
343537	+	32.5	AAGGCTGATAAATGTGAAAAGCCGCCGCATATCATCAGGCGGTTTTTTTCT	-15.2	15.38	cah+43
347072	+	118.63	TCTAAGCGGGACTAAATGGGCATCCTCCCTGCGGGGGTGTCCATTTCATCC	-23.1	6.62	ycgN+46
347365	+	16.56	CTGAGCGGCGCTTGGATCGTCATCGGACTTTGCCTTGGAGCGTGGGCGAAC	-14.7	6.85	ycgO_CDS
347814	+	11.19	AGATCCTGATATGTTTAATATTTTCAAAGGAACGAGCGTCCTTGGCATTAT	-6.6	0	ycgO_CDS
348381	+	12.13	TGTACTGCTCAGTCTGTTTTGGAAACGAATGACCAAATGGGGGGCACTCGC	-9.5	0	ycgO_CDS
348618	+	25.56	ATAAAGATCGAAAGGAGGAGGAAGGGGCTGTCCCTTTTTCCTCTTTTCTCC	-28.3	48.94	ycgO+47
349958	-	53.56	CAGAGGATTTTAAGTGAAGACGAAACCAGTACAAGTACTGGTTTCTTTTTT	-14.5	84.21	ycgQ+38
349994	+	91.44	GATGAAAAAGAAATAAAAAAGAAACCAGTACTTGTACTGGTTTCGTCTTCA	-13.6	66.22	ycgP+35
350425	-	10.56	GGAGATCACTACTCCCAAACACAGTATTTGCGGCCTGATGCCAGCCTTTAT	-9.9	5.29	ycgQ_CDS
353865	-	64.31	ACTCCTTCACACCTGATGGCAAGCAGCCCTTTTCCTCAAGGGCTGTTTTAT	-19.8	86.67	nasF+35
355310	+	25.63	TCCTTGAGCGCCTGTTTTCCTTTGATGGTGAGCAGGCCTGGGTCGCCGGGT	-21.3	8	ycgT+1442
355328	+	10	CCTTTGATGGTGAGCAGGCCTGGGTCGCCGGGTCCGGCTCCCACGAAATAT	-24.9	7.77	ycgT+1460
355375	-	37.44	ATCTCGTATATTGATCAAAAGACCGGATCACTTTTCTAGTGGTCCTTCATT	-11.6	9.5	nasE+37
355647	+	21.13	CAATGGCGCGGATGCTTCCGTCTGAAAGCTTGAAAACCGCGAGCTCCTTAT	-12.4	25.76	ycgT+1779
367255	-	49.81	AACAAACGTTTCATTAAAAAAAGCCGTTCCCCATGGGACGGCTTTTTTTCT	-20.1	100	yckA+50
369709	+	92.13	AATGCTGACGAAGAGATTAGAAAGAGCGAATAATGGTTCGCTCTTTTTATT	-17.4	96.77	yckC+18
371692	-	394.13	CTGTTTCTGTGTAATGAAAAACCCCTGAGAGAATAACTCTCAGGGACTCTT	-17.8	83	nin+37
374566	-	95.69	CAAACCTTGAATAGCATCACACAACCGGCCTGAAGATCAGGCCGGTTTTAT	-19.6	100	hxlB+37
376422	+	12.25	ATGTCATGAAAGAATCGTTGTAAGACGCTCTTCGCAAGGGTGTCTTTTTTT	-13.1	90	hxlR+28
377171	+	11.44	CAAGAGTTTATTCGCAGAAATGACGCCATGCGCCTTCGGTTGCGGCTAGAT	-9.6	1.21	srfAA_CDS
377198	+	16.5	ATGCGCCTTCGGTTGCGGCTAGATGAAAACGGGGAGCCTGTTCAATATATT	-8.3	0.58	srfAA_CDS
377202	+	16.44	GCCTTCGGTTGCGGCTAGATGAAAACGGGGAGCCTGTTCAATATATTAGCG	-10	2.31	srfAA_CDS
377216	+	20.69	CTAGATGAAAACGGGGAGCCTGTTCAATATATTAGCGAGTATCGGCCTGTT	-6.4	11.46	srfAA_CDS
377890	+	16.81	GTTTGTTTCTACGGTTCCGCTTCGGACAAACATTGACGGCGGGCAGGCGTT	-10.6	1.81	srfAA_CDS
379648	+	10.06	AGCCGTGATTCAGCAGGCGCCAGACGTTGCAAAAGCCGTTGTTTTGGCACG	-14	0	srfAA_CDS
379887	+	103.5	TTGCACTAGAGGTGAAGGCTGTCAGCGGCACTGCCTATACAGCGCCGCGAA	-16.3	0	srfAA_CDS
388109	+	10.44	CGTTACAAACAAGACGTTCAGCGCCAAGGCTTTAACCTGGCAAAAGACATA	-9.7	0	srfAB_CDS
388394	+	52.19	GAGCGCTTGGCGGGTTTTGAACAGCCAAGCGTGCTCCCGGGCCGCCTGCCT	-20.9	0	srfAB_CDS
388601	+	42.69	GATGATGTGATCTTCGGAACGGTCGTCTCGGGACGACCGTCTGAAATCAAC	-23.7	0	srfAB_CDS
389778	+	45.19	TTGAGGTATTCGGCGCACTGCTGAATGGCGCAGCACTTTATCCGGTCAAAA	-10.7	20.76	srfAB_CDS
391156	+	35.44	GGTTGTGCAAACCGTTCATAAAAACATATCGTTCCAGCTGGAGGCTGCCAA	-9	0	srfAB_CDS
391237	+	21.13	CAAAGCATTTGTTCAGCCGTTTGAATTAAACCGCGCGCCGCTCGTCCGTTC	-5	2.25	srfAB_CDS
391261	+	11.81	ATTAAACCGCGCGCCGCTCGTCCGTTCGAAGCTTGTCCAGCTGGAAGAAAA	-7.5	11.71	srfAB_CDS
396923	+	13.13	GCCGGCATCTGGCAGGACGTGCTTGGAATGTCTGAAGTCGGTGTCACCGAC	-18.8	0	srfAB_CDS
398748	+	91.19	TGAATGTGATCATGGACCGGTACGATGTATTTCGTACCGTGTTCATTCACG	-24.3	0	srfAC_CDS
399395	+	11.81	TCTGGCGATTTGGCCTTCGGTACAGTTGTTTCAGGGCGTCCCGCGGAAATC	-12.3	2.93	srfAC_CDS
401875	+	11.25	TGACCGCTATGCGGATTTGATCCAGAAGCTGCAGCCGGAAGGGCCTTTAAC	-10.8	0	srfAC_CDS
403153	+	1109.44	TCATTCAACCGTGATCAAAAGCGGACAGCTTCGGCTGTTCCGCTTTTTTTG	-19.8	92.23	srfAD+37
404439	-	31.06	AAAAACTCAAATTTAAAAAGGATCAGCATTGACAGTGCTGATCCTTTTATA	-20.3	100	ycxB+19
404478	+	15.19	CCACCATTCAATATAAAAGGATCAGCACTGTCAATGCTGATCCTTTTTAAA	-17.8	100	ycxA+35
406918	-	30.75	AGATGACATGTGAGGACAGATCATATGCGTACAGCGGATCTGCCTTTTTAT	-14.1	25	yczE+1322
407238	-	13.81	CTGAGGAAGCACCAGATGGGTGTGCATACAGGGTGCCTGCCCGCTGGAGAA	-18.1	0	yczE+1002
407285	-	39.88	ACCCCTTGTTTTTCCAGTCTATGAATCACTCTTGAGGCGGGCAGATCCTGA	-7.1	12.23	yczE+955
408211	-	224.06	AGCATCTCCGCCTGTACACTAAAACAAAGCCGCCTTGGCTTTGTTTTTTTA	-13.9	43.43	yczE+29
408973	-	37.25	AGGGTTTGCCAACACGCTGAAACAGGGCGCCTCCGGCGGCCCTGTTTTTTT	-21.8	54.05	tcyC+235
409129	-	386.56	TTCAGATTATTGACAAAATCCTAAAACGATATTCGTTTTAGGATTTTGTGA	-21.7	72.14	tcyC+79
409171	-	21.75	TGAACCCGCTGTAATAAGAAAAACAGAGCGTCAGCGCCCTGTTTCAGATTA	-9.4	11.11	tcyC+37
410425	-	55.38	ATGGGTGTTCAGCGTATACGTATCCGCAATACGCGGCACTCCTCTTCTCGT	-13.6	0	tcyB_CDS
410552	-	189.69	CATTCTGGCCGATACTTTCAGGGGGAATCTACTATACGATTCCCCTTACGA	-15.8	7.11	tcyB_CDS
410907	-	29.81	ATGCCGGCGCTAAAGTAGAAGGCGTTGAAGGCATGGCGCAGGCCCTTCAAA	-16.3	0	tcyA_CDS
410946	-	10.38	CTCAATCACTGACAAGCAACTACAACAAATTAGCTACAAATGCCGGCGCTA	-1.3	10.22	tcyA_CDS
411098	-	20.75	GTTTGACGTTGTTGCCAACCAAGTCGGAAAAACAGATCGTGAAGACAAATA	-6.2	0	tcyA_CDS
411251	-	17.75	ATATGAGCCGTTCACTTACCACGACAAAGACACTGATAAACTGACTGGCTA	-6.3	14.11	tcyA_CDS
411299	-	27.44	GGCTTCAATTAAGAAAAAAGGTGTGCTCACAGTCGGAACGGAAGGAACATA	-5.7	0	tcyA_CDS
415318	+	14.69	AGATTTAAAACGGTAATATCGATAGCCTGACGCCATGCGTCAGGCTTTTTT	-18.5	100	yclD+35
416193	-	23.94	GTCTTATAATCAGAAACAGCCCGCGGATGTTGATCTGCGGGCTGTTTTTTA	-28.9	81.82	dtpT+42
416234	+	41.75	CTTGATCAATAAAAAACAGCCCGCAGATCAACATCCGCGGGCTGTTTCTGA	-21.7	43.18	yclE+39
416883	+	12.88	AAAGGAACGTAAGCGGCAAGACGGGATTTTTCTGTTTTGTCCGCTTTTTTG	-20.8	55.56	yclE+688
428710	+	63.63	CAGCAATAGCATACAGGGCGGCGCATCAACTGATGCATCCGCCTTTTTTGC	-20.6	47.95	yclK+42
428989	+	56.06	ATCCAGCAGGAACTGAAACACATGCAGCATGATTCCAACTTGCTGCTTTAT	-10.8	0	rapC_CDS
430124	+	279.31	GGAATGACGTAAGAACAAGCCCCTTCTCATTAGCGAGAAGGGGTTTTTCTT	-23	91.18	phrC+39
430129	-	42.56	CGTAATCTCCATGAAGGCGGCACCGCAAGACTATGTCTTGCGGTGTTTTTT	-22.1	94.12	yczN+227
432641	+	12.69	TTCGTGTCACCGACGACGGCGGGCACGATGGATTGGGCGAGGCTCGGCATT	-17.1	8.02	yclN_CDS
433193	+	11.5	GACAATCTGAAGAGCAGCCTGCCGCATACTGTGCTGTTGGGAGCGGTTTTT	-10.6	3.01	yclN_CDS
433477	+	14.94	AAAAAGTCGCTGCCATTGTGCTGACTGGGGGAGCGATTGCGTTTTCGACCA	-15.9	3.3	yclO_CDS
433828	+	17.25	CGAACGAGTTCCAAGTTGTGCAGGACAAGATGTTTGCCAGCTTTAACAATA	-11.2	0	yclO_CDS
433880	+	14.31	CAATACGGATTTGTTATGGCTCGCGTTCATCATCTTCCTGCTGACAGGCGT	-7.1	1.98	yclO_CDS
434046	+	16.56	ATTTTGGTTTCTGTTTCAACAGCGCTAGTCGGGCCGATTATGTTTTTAGGC	-6.8	5.95	yclO_CDS
434080	+	14.25	CGATTATGTTTTTAGGCCTTCTGGTCGTCAACCTGGCGAGAGAATTCCTGA	-13.5	0	yclO_CDS
434381	+	93.94	AAGGGCAAAATCACCTCGTTTATCGGTCCTAACGGCGCCGGCAAAAGTACG	-8.9	3.22	yclP_CDS
434480	+	10.75	TACATAGACGGACAAGAGATTGGAGCATGTGACAGCAAAGAGCTTGCCAAG	-6.1	0	yclP_CDS
434623	+	10.44	CCGGCTGACAGAGGAAGACTGGGTTCATATCAACCAGGCGCTTAGCTATAT	-8.6	0	yclP_CDS
434925	+	13.88	TCGCTTTGAAAAACGGCCGAATCGTTAAAGAAGGACCGCCTGAAGAAATGA	-6.1	0	yclP_CDS
435215	+	22.56	GACAAAAACGGCACAAAAGTACCGAAGAACCCTAAAAAAGTTGTCGTATTT	-5.8	0	yclQ_CDS
435310	+	77	TATAGTAGCGGGCCTGCCGAAACAAGTCCTTCCTAAATATCTGTCCAAATT	-5.4	5.8	yclQ_CDS
435481	+	21.19	CTCTAAAATTGCGCCGACGATTTACCTTGGTGTAGATACAGCGAAGTACAT	-9.2	13.57	yclQ_CDS
435779	+	12.13	TCTACGCACGGACAAAGTGTTTCTTACGAGTACATTTCAAAAACAAACCCT	-3.7	6.66	yclQ_CDS
435992	-	38.13	ACGCTGATTAACAAAAAAAGAGCCCCGCTATTTAGCGGAGGCTCTTTTTGG	-22.9	91.67	ycnB+44
436030	+	693	AGAAAAGTAAAACCAAAAAGAGCCTCCGCTAAATAGCGGGGCTCTTTTTTT	-22.4	99.16	yclQ+41
438476	-	73.13	TTGAAAAATAAGCTCTTATTCGGCCTGTCGGATTTTCCGGCAGGCCTTTCA	-22.6	92.11	ycnD+40
440051	+	200.94	ATGTAGACCAGGACCGCTGGTGAATCAATCCCCTGTAACGGGGATTTTTTT	-18.5	85.29	yczG+28
444388	+	55.19	AAAGAATGCACGCTCCTGAGAGCTGCCGGATTTTCCGGCAGCTCTTTTTGT	-24.5	100	gabD+50
446131	-	92.5	GTGCCTAATAAAGAAAGCGATCCAGATGTCATGTCTGGGTCGCTTTTTATG	-23.3	100	ycnI+43
446409	-	14.75	TGTTGCCAAAAACCCTGACAAAGCGGAGGAAGCTGCTTGGGACGCATACCA	-9.1	0	ycnI_CDS
449570	+	79.06	TCATTTATAGAGGAAAGAGAAAAGGCTCCTGAAACCAGGAGCCTTTTTATT	-21.2	100	ycnL+19
452773	+	33.25	AGAAACTTAATCAATAACCGACCACCCGTGACACAATGTCACGGGCTTTTT	-15.2	88.89	mtlD+34
453893	-	14.75	GTAAGGAAATGGACAGGCCGGGGCAGCCATCTGCCACCGGCCTGATTCATC	-29.8	46.67	yczH+759
453935	+	93.06	AAAGCTCTGATGAATCAGGCCGGTGGCAGATGGCTGCCCCGGCCTGTCCAT	-26.8	10.37	ycsA+41
454471	-	10.44	AAGGCATGCCCATTCCGTTTCTGCTATCCAGTGAATTGAGACGGTTATCTC	-8	17.39	yczH+181
454613	-	15.81	TCATTTTTTTAAACGTGCACGGCGCTTTATTATCGGTGCCGTCATGTTCCA	-18.7	17.95	yczH+39
454666	-	19.88	CGCTTTCTATCATAAAAAACGGGGCGGAAAGCCGGCTCCGCACCGTTTCAT	-15.9	16	yczH_CDS
454704	+	49.25	AAAAAAATGATGATGAAACGGTGCGGAGCCGGCTTTCCGCCCCGTTTTTTA	-17.3	1.45	sipU+112
455775	+	328.31	ATATTGAAAAATGAAAAAAACCCTTCACAACATTTTGTGAGGGGTTCTATT	-16.9	85.37	ycsD+37
463069	-	45.13	ATATTTCGATCACACATAAAAAACGCGCCTGTCATGAGGCGCGTTTTCTAT	-18.3	16.98	yczJ+427
463345	+	12.94	GCTTATTGCTTTTAACTATACGGAACACACCTCTGTAATCCAATCGGTCAT	-5.2	6.89	yczI_CDS
463445	+	30.88	AAAAAAGAAAATGACGGCTCAGGCGCTTTTAATATTTATACCGCCGTTTTT	-6.7	3.65	yczI_CDS
463565	+	10.5	TCGACCGTCGGGAACGGGGTATAGAACCGATGAAGCAAGGCTTTCCACTCT	-9.8	0	yczI+75
463604	+	279.94	GCTTTCCACTCTTGATACTCTGAAGAACCGCGAAAGCCTTCCGTATGGTCC	-6.8	21.51	yczI+114
464168	+	12.19	ATTTCGTCAACAGGTATAAAGCCATCTATGAGCAGGCCGGCGTAAAAAATT	-5	0	pbpC_CDS
464327	+	10.06	AGAATACTGCTGTGCTGAAATTAGAAAAAACAGATGACGAGGAGTCATGGA	-7.2	0	pbpC_CDS
464468	+	18.13	TTTACGATAAAAATGGAAAAGGCTTAGCCGTCAATACAGATGTTCCGGAAA	-4.8	0	pbpC_CDS
464503	+	13	ACAGATGTTCCGGAAATTGGAATTGTTCCCGGAGAGCTTGGCGATAAAAAA	-9.7	0	pbpC_CDS
464901	+	11.31	AACTGGCTGGAAAATCTACGTGCCGCAAACCGGGGAAGTCATCGCTGAAAA	-8.5	0	pbpC_CDS
465553	+	10.38	ACAGGCTACGGACAAGGGCAAATGCAAATGTCTCCGCTTCACTTGGCAACT	-9.1	0	pbpC_CDS
466977	+	219.81	GGTTACGATATTCCATAAAAAGCATCAGTTTACCAGCTGATGCTTTTTCAA	-16.6	62.5	ycsN+33
469255	+	90.56	CATACTGTAAACCTGCATGGCACACGTCAAAAATTTGGCGTGTGTTTTTCT	-18.4	84.91	mtlR+41
470978	+	31.75	ACATTCATAAAAGAAGAAGCCCGTCCACTTTATGTGGCGGGCTTCTTTGCA	-25.9	100	ydaB+41
474384	+	32.5	CCGCTTCCCAAGCAGCATAACCAGCTGCCCTTATTCTTTTCCTTCATAACA	-7.5	0	ydaG+159
474400	+	14.13	ATAACCAGCTGCCCTTATTCTTTTCCTTCATAACAAATCGCCCCTAACGAT	-0.8	1.84	ydaG+175
474415	+	22.69	TATTCTTTTCCTTCATAACAAATCGCCCCTAACGATGAGATGGAAAAAAGA	-7.1	0	ydaG+190
474493	+	14.25	GCGGCTTCGGAGCCGCAGTGACGATTGAGAGGTAGGGCTTTCGTTGTCTTG	-22	0	ydaG+268
474601	+	17.25	TATGAATCTAACCCGCCTGACTTGGCGGATGATATAATCTTTATTTGCGTA	-10.6	41.83	ydaG+376
474650	+	849.13	TATAGAAAAGAATAAGACAAACCGCCCGGCGTACGCCGGACGGTTTTTTTA	-18.5	95.95	ydaG+425
475171	+	10.13	AAACAAGGATTCAAAAATGCCCTTTCCTATTTGCGTCTGCCGTCCATTTCA	-4.5	0	ydaH_CDS
475541	-	128.44	ATAAATAAGGAAGCGCAAAAAGGCTGGATCTTTATGATCCAGCCTTTCTTA	-20.6	87.14	ydzA+43
475578	+	10.19	AAAGTGGTTTTAATAAGAAAGGCTGGATCATAAAGATCCAGCCTTTTTGCG	-22.3	66.67	ydaH+38
478777	+	62.25	GGTTTGGATAAATAATAAAAAAACCTGTGCCTATCGCACAGGTTTTTTATT	-17.8	78.95	topB+36
485986	+	36.19	AGAAAGACAGATACAGAATAAAACAGAGGCGATTTTAGCCTCTGTTTTTTT	-16.6	100	ydaN+30
486235	+	865.63	TCATATGCCCGAATCCGTCAGCTAACCTCGTAAGCGTTCGTGAGAGGAGAT	-8	71.06	ydaN+279
486294	+	814.56	CCTGTGTTCGATGTTATGGCACAGGGGCATCCGTTTGCCTCTGTGTTTTTT	-19.8	26.79	ydaN+338
487446	+	17.13	TCCCGCAGCTTGCCTTCAACCTGGCGAGAGACCAGTATATGCCGCGAATGT	-10.5	1.1	ydaO_CDS
488293	+	114.38	TTTTAAAAAGTAAAGCTCTAGGACCAAGGGAATCACCTTGGTCCTTTTTAG	-18.8	62.71	ydaO+38
490552	-	42.19	TTTCCAAAAAAAAAAAAAAAAACAAGGGCTCTTAGGGCCCCTGTTTTTTTA	-17.2	17.24	ydzK+225
490681	-	133.88	CAAGGACAAATGCATCTTCCTTTGAAACAAGATGCATTTGTCCTTTTGTCT	-23.7	27.81	ydzK+96
491116	-	291.38	TTGTAGATACGTTTCGATAAAAAAACCGGCTTCTAAAGCCGGTTTTTATTT	-17.2	41.46	mntH+31
491481	-	10.31	CAGCCCTATGTCTGCGGCTTTGTTCGGGATCGGGCTGCTCGTTGCCGGTCT	-15.3	4.8	mntH_CDS
494417	+	35.19	AGATGGAATAGCAGAAAGCAGACGGACACCGCGATCCGCCTGCTTTTTTTA	-15.7	100	ydbA+40
495702	-	60.06	GGGACGCGAGTAAAGAGACAAGCCCAAAACATGATGTTTTGGGCTTTGATT	-16.3	78.38	ydbD+38
495739	+	20.94	GTTCTGAAGGCATAATCAAAGCCCAAAACATCATGTTTTGGGCTTGTCTCT	-18.1	8.33	ydbC+36
497368	-	28.19	AAATTGAAGCATTGCAAAACGGCGATGTTCAATTTATCGCCCCCTCCACAT	-13.5	17.19	dctB_CDS
497760	+	11.13	CCCTATGTTAAGGATAATGGGGGCTATGACATTCGTAAAGACCTGAAAGGA	-8.8	10.45	ydbC+2057
500347	+	13.44	AATGGTGATCGCACCAATCATTTTCTTCACAATCGTTCTCGGGATTGCAAA	-10.2	0	dctP_CDS
500440	+	30.44	GTTTATCTATTTCGAGGTTGTCACCACCCTCGCACTCATTATCGGTTTATT	-7.2	1.81	dctP_CDS
500938	+	17.31	TTACGGATTCAGCCTGTGGAATTACCTTCGCTTCATTAAGGATGAGCTTTT	-7.5	0	dctP_CDS
501032	+	12.19	ATGATGGATAAAATGGAGCGCTACGGCTGTTCCAAATCCGTTGTCGGGCTT	-16.5	0	dctP_CDS
501147	+	10.56	TCTTTTTGGCACAGGTGTTTGGAGTAGACCTCAGCATCGGCCAGCAAATTA	-12.2	0	dctP_CDS
501465	+	549.81	TGAAAACAGCAGTCTGAAAAAAGAACGGCCCATCCATGGGCCGTTTTTTTA	-20.7	87.58	dctP+34
502883	+	636.06	CAACAAATGCTATAATACAAACAGTGCCTAATGTTGGGCACTGTTTATTTT	-17.5	62.12	ydbI+252
505058	+	553.19	ATGCAAATCCTGTGTAATCGCGCTGTTCCCTTGGGGAACGGCGTGTTTTTC	-21.8	84.44	ydbL+34
505915	+	21.38	GCTGCTTCACATTCCTGCGATTTATCTTGGTGTGGCTCAAGCTGCTCGTGA	-9.1	15.85	ydbM_CDS
506295	-	83.56	CTGCAAGAGCAAAACAATACATAAAAAGAGCCGGTAAGGCTCTTTTTTTTA	-15.4	75	ydbN+27
506327	+	51.31	GCTGAAGCGTTTGAGTCATAAAAAAAAGAGCCTTACCGGCTCTTTTTATGT	-14.2	38.64	ydbM+30
507675	-	477.5	TCAGGCTCTACATGAACATGAACATGAGTGACATCGTGTTCATGTTTTATT	-18.3	73.68	ydbP+78
509353	+	1031.5	TACATTCTAATGAAGAAGGACACTGCCGGTAAAAGGGCAGTGTTTTTTCCC	-20.1	37.12	ddl+41
510862	+	38.38	ACACTAATGTATGCCGGCCGAAAATTATGTATATCTGGCCGGCTGCGGCTA	-17.6	8.07	murF+105
510984	+	15.06	CTCCGCTGGATTCTTGGGAGCGGATGGAGCAGCAGCCGGCATATTCGAGAT	-12	0	murF+227
511005	+	41.19	GGATGGAGCAGCAGCCGGCATATTCGAGATGCCGATCTGCTTCTCATCTTA	-21.4	1.29	murF+248
511370	+	13.75	CTGCGTTTGGTATACCCCTTGTTGAAAAAATTAACCCCGAGTCTCCTAATA	-1.9	4.37	cshA_CDS
511590	+	12.56	ACCTGGACGTCTTCTTGACCACATCAACCGCCGCACCATTCGTTTAAACAA	-2.1	0	cshA_CDS
512015	+	10.13	GTATTCACGGTGACTTAACGCAGGCGAAACGTATGGTTGCGCTTCGTAAAT	-10.8	0	cshA_CDS
512642	+	17.19	CAAACGATCGCCGTTCTTCAGGTGACAGACGCCAGAAAAAATCTTACTAAT	-8.5	24.7	cshA+1
512667	+	21.88	CAGACGCCAGAAAAAATCTTACTAATTTGATCGATTCAGAGCCCAAAACAT	-2.2	12.93	cshA+26
512686	+	1229.5	TACTAATTTGATCGATTCAGAGCCCAAAACATGATGTTTTGGGCTTTTTTA	-17.8	98.59	cshA+45
512895	+	11.25	CAGACGGATTAAAGGTTTGGCGACTTCAAGAGATCATCATATCCGCTGTTT	-10.1	0	ydbS_CDS
512905	+	12.88	AAAGGTTTGGCGACTTCAAGAGATCATCATATCCGCTGTTTGCTTGCTTAT	-6.2	0	ydbS_CDS
514957	-	26.63	TCAGATTGTTGACAAAATCCTAAAATGGTTTTCATTTTAGGATTTTGTCAT	-23.7	33.33	ydcA+59
515003	-	13.06	CGTTTTTATGCGTGCAAAAAAAAGAGCGGCGGTATTAACCGCCGCTTCAGA	-20	20.69	ydcA+13
515035	+	405.25	TTAGGATTTTGTCAACAATCTGAAGCGGCGGTTAATACCGCCGCTCTTTTT	-19.3	76.12	ydbT+271
517292	+	51.63	ACAATCATCGAAATAACCGCCAAAGGCCAAACATGATTTGGCCTTTTTTTC	-12.3	57.14	ydcC+35
518823	+	18.13	AGCAGTGAGAGCGTATGTCAGCGAACGAACAACTCGTCACAACCGTGATTT	-7.8	1.64	endB_CDS
518837	+	13.81	ATGTCAGCGAACGAACAACTCGTCACAACCGTGATTTGATGAGACGCGGCT	-10.6	7.37	endB_CDS
519171	+	24.69	TCGAAATCGATGCAAAACGCTACGGTTTTGAAAGAGATTCCGTTATTTTGC	-10.3	1.41	ndoA_CDS
519299	+	12.13	GTTGATGAAGCCTTACAAATCAGTTTGGCACTCATTGATTTTTAGACATAT	-10.6	21.9	ndoA+6
519330	+	1923.06	TCATTGATTTTTAGACATATTTGCAGGTTGCTCAAATAGAGCAACTTTTTT	-12.1	95.62	ndoA+37
524291	+	129.13	CTGTCCTAAAAAACCAGAAAAAGAAGCTGGACATCCGGCTTCTTTTTTTTG	-19.2	92.31	rsbX+42
525678	+	38	GGAACTATTGAAACATGAGTAAAGATACGGGCAGCGCCAGCTGTCTTTTTT	-12	61.9	ydcH+29
527931	+	150.38	ATCGCTGTCTATGGTAAAATAAAAGCACTGCTTACGAGCAGTGTTTTTTCC	-14.4	69.15	ydcI+29
528770	+	346	GGTAGAGCTATCGGCTGTTAACCGATCGGTCGCAGGTTCGAATCCTGCCTG	-15.4	0	ydcK+189
528874	+	33273.6	GTGTAGGTCGCGTAAGCGGCGCGAGGGTTCAAATCCCTCCTTCTCCGCCAT	-16	31.83	ydcK+293
528981	+	683.69	GCCCTTTCACGGCGGTAACACGGGTTCGAATCCCGTACGGGTCATTCCATT	-14.7	0.37	ydcK+400
529060	+	7214.88	AACGGACTTTGACTCCGTCATGCGTTGGTTCGAATCCAGCTAGCCCAGCCA	-10.8	28.19	ydcK+479
529166	+	680.94	GACTTTTAATCAGAGGGTCGAAGGTTCGAGTCCTTCATGGCTCACCATTTG	-13.4	0	ydcK+585
529257	+	1313.69	TTAGGATCTAGTGTCTTACGACGTGGGGGTTCGAGTCCCTTCACCCGCACT	-13.4	0	ydcK+676
529422	+	3814.44	GGCCTAGTGGGTGAATAACCCGTGGAGGTTCAAGTCCTCTCGGCCGCATCA	-19.1	19.76	ydcK+841
529459	+	3176.06	TCTCGGCCGCATCAATGATACCAAGGGTTTTGACACCCTTGGTATTTTTTT	-17.8	94.07	ydcK+878
530891	-	130.13	AACCTCCAACATCAACAATTTGTAATTGCCCATGAATTAGGGCATTACTTT	-11.4	72.94	immA_CDS
545899	-	22.44	CTTTTACTTCTTCATAGTCTGGTGTTTTCTTTGATAACCCCAGACGATCAT	-11.8	15.38	yddK+267
545961	-	159.63	ATGTCAATAAAACTAAAAGAGGAGTAAACACACGGTTTACTCCTCTAACTC	-18.1	71.62	yddK+205
545999	+	37.25	GGAGAAGAGACAGAGTTAGAGGAGTAAACCGTGTGTTTACTCCTCTTTTAG	-17	82.14	yddJ+24
548619	+	29.44	GGAAAAGAGGAAAAAAGCTTAATCTTTTTTCGAAGGTTAAGCTTTTTCTTT	-19.5	33.33	phrI+62
549901	-	39.75	AAACCCTTGGTATTATTGAGATGCGGCCGAGAGGACTTGAACCTCCACGGG	-10.5	68.75	yddN+339
549931	+	1415.25	AGGGCCTAGTGGGTGAATAACCCGTGGAGGTTCAAGTCCTCTCGGCCGCAT	-19.1	91.86	yddM+280
550131	-	10.69	GAAAAGGGTGATACATATTAATCATGTATAATATGTATCACCCTTTAGTTT	-24.9	0	yddN+109
552031	+	46.06	TAAAAAAGCCCTAGGTTGGATATGGAATTTACCAAGCTGGGGCCTTTTTAT	-21.6	71.43	lrpA+102
553217	-	11.69	GATAATGAATAAAGGATGTCCAGAAGTATTTTTCTGAACATCCTTTTTTAA	-17.9	66.67	ydeB+6934
553261	+	80.88	AACAACTTAAAAAAGGATGTTCAGAAAAATACTTCTGGACATCCTTTATTC	-20.9	97.3	yddQ+103
554543	+	22.19	AAATAGAAGAAGCTCATAATTATAAAAACTAATCATGAGCTTCTTCTAATA	-21.3	57.14	yddR+68
557493	+	31.63	TAGCTAATTTTAAAATCACTTTGTCTTTATAAAGGACAAAGTGATTTTTTG	-18.8	100	yddT+44
558112	+	286.5	TCATAAAGTTGGGAAAGAAGGATGTTACTTATGTAGTATCCTTCTTTATTA	-18.1	39.29	ydzN+54
559264	+	21.19	TGGGCAAGGATAGTATATACTGTGTGGTTACACACTAGGAGGCAACAAAAA	-7.7	0	cspC_CDS
559306	+	29.75	CAACAAAAATGGAACAAGGTACAGTTAAATGGTTTAATGCAGAAAAAGGTT	-0.2	0.58	cspC_CDS
559328	+	22.63	AGTTAAATGGTTTAATGCAGAAAAAGGTTTTGGCTTTATCGAACGCGAAAA	-3.4	18.31	cspC_CDS
559474	+	50.13	GTGCTCGTGGAGCTCAAGCTGCTAACGTTCAAAAAGCTTAATCTTCAATCG	-7.7	2.9	cspC+10
559514	+	5539.06	ATCTTCAATCGTTTATACAAACAGGCTCTTTATATAGGGCCTGTTTTTTTA	-16.2	97.85	cspC+50
559534	-	49.13	TTTCTATTACCTTGTAGCATCTCCCTACTCGAACGTTGAGTAGGGTTTTTT	-15	38.24	ydeB+617
561140	-	13.38	TGAAGTCATAACAAAAAAAAGCAAACTATTTTATATAGTTTGCTTTTCAAT	-14.2	87.5	ydzE+40
561179	+	14.25	GAACAAGGTTAATTGAAAAGCAAACTATATAAAATAGTTTGCTTTTTTTTG	-14.9	100	cspC+1715
563573	+	17.31	CTCGGCAGTATCAAAAATACCAAGGGTTTTGACGCCCTAGGTATTTTTTCT	-16.3	61.29	ydeD+112
568995	-	18.63	AATGTTGTCCTAAGAAAAAACAAGCATCTTACTATGCTTGTTTTTCTTCTA	-14.8	30.77	ydeJ+295
573402	-	52.69	ACATCTTTCACCCATCTGCTTCAATCGAGCCCGCGAAAAGCGGGCTTTCTG	-15.9	100	ydeN+50
575665	-	22.19	CTAATAACCAGAAAAAATACCAAGGGTTTTGACGCCCTTGGTATTTCTGTG	-21.1	62.5	ydeP+47
575706	+	230.75	GGTCTGAATCACAGAAATACCAAGGGCGTCAAAACCCTTGGTATTTTTTCT	-19.4	91.49	ydeO+144
579260	+	62.63	TGGAAAAAATACTTGCAATGTAAACAGGCCTCTAAAGAGACCTGTTTTTTA	-10.9	85.29	ydzO+28
581592	+	25.88	ATGTGTTGTTCAACAGGTGTCTGCGAGCTGAGTGCAGACACCTGTTTTTGT	-22.9	27.78	ydfA+396
585370	+	12.38	TGACGATTCATATTCTGGAAGCCGAATGTGTTTCACTTCGGCTTCGATTTG	-16.7	15	ydfD+333
586588	-	189.56	CTTCAAAATAAGAAGAAGGAGTAAGATTAGAACAAATCTTACTCCTCCTAG	-19.2	88.16	ydfG+40
586629	+	70.94	GCACGATATCTAGGAGGAGTAAGATTTGTTCTAATCTTACTCCTTCTTCTT	-21.2	84.38	ydfF+81
589654	+	39.56	TGCATATTTGAAAATTGCCCAAACGTACATGCCCGAATGTACGTTTTTTTC	-12.4	100	ydfI+53
591892	-	27.44	TAAATACTACCATAAGCAAAAGAGCAGATCATAAAAGATCTGCTTTTTCTA	-15.6	100	nap+411
592203	-	133.5	TAGCCGGGCACTTCAAAAAATAGAGTCCCTCTTATGGACTCTATTTTTCTT	-16.8	51.88	nap+100
592242	+	18.44	GGGTTTTGTCCAAGAAAAATAGAGTCCATAAGAGGGACTCTATTTTTTGAA	-20.5	13.79	ydfJ+351
603689	+	23	TTGCGGGAGGCATCATAAAGGTAAGCCGCGTTCCCTTTCAAGTTGAGCATT	-9.3	10.57	ydgD_CDS
604084	+	70.63	AATAGAGCTCCATTTCTGTGTTATTCGTCCGGCATCAGCTGGGCTTTTTTT	-14.4	2.86	ydgD+144
604682	-	24.13	AGAAAGTTCAAGCGGCATTGAAAAGGACAACAGCTGTTGTCCTTTTTCTTT	-15.7	64.71	vmlR+54
606407	-	331.31	ATCATGCACAGGCACGGCTAATCCTTCCAACACATTTGGGAGGATTTTTTT	-15.1	72.68	ydgF+292
606427	-	27.94	TATAAAAAATAGCTTATTTGATCATGCACAGGCACGGCTAATCCTTCCAAC	-4	24.62	ydgF+272
606655	-	138	TCAATAAGACTCAAAACTCCTGCCTCAAAAATGAGAGCAGGAGTTTTTTTG	-21.2	86.79	ydgF+44
606697	+	24.06	ATTTTCATCAAAAAAACTCCTGCTCTCATTTTTGAGGCAGGAGTTTTGAGT	-22.6	100	ydgE+2121
607464	-	15.5	GGAGTGTCCAGCTTCACAAACCTCTGGAGCCACGGAGGCCTGTTCCCGAAT	-15.2	0	ydgF_CDS
608215	-	33.81	CAAAAACTGAAAAAGCATAAAAAAGCGGCTCCCTAAATGGAGCCGCTTTTT	-21.2	100	dinB+31
612084	+	95.44	GGAAAAGAGTAATCGAGAGAAGAGTGATGAATGGTCATCACTCTTTTTTCA	-22.4	52.04	ydgH+39
613878	+	20.56	GCCAGCTGATTGTCGGGCCGGTCAGCGATGCGCAGGGAAGACGAAAACCGC	-14.4	29.35	ydgK_CDS
614846	-	14.81	TTGTTATTCTAAATAAAACAAAAAACCTGACGTCATGTCAGGTTTTTTTAT	-14.7	36.36	ydhB+39
614880	+	133.44	GAGTAGGGCAGAATTCATAAAAAAACCTGACATGACGTCAGGTTTTTTGTT	-16.3	93.18	ydgK+31
616592	+	73.38	TTGATTTGTATGATCCGGTACCAAGGGAGAGCAGAACCCTTGGTATTTTTT	-17.6	53.33	ydhC+47
619320	+	33.94	AAAAAACAAATAAGAAAAAGAACTCCCGTACCTTGTACGGGAGTTCTTGAT	-22.9	63.16	ydhE+38
622217	-	54.19	TGAAAAGGCGTAACATATTTTATACAGCTCATATGTTATGCCTTTTTCTTC	-19	26.23	ydhH+76
622270	+	63.88	GAAAAAGGCATAACATATGAGCTGTATAAAATATGTTACGCCTTTTCATTT	-16.3	39.68	ydhG+52
624374	+	26.19	GTGTATATAAAAATCTTAAAGCAGTAATTGCCGCCTGACAGCGGCTTTTTT	-9.3	71.43	ydhJ+24
625109	-	113.31	GACCTGTTCAAACAGCAAAAAAATCCTCCTTGTAAAAGGAGGATTTTTTAT	-20.2	96.72	pbuE+16
625144	+	36.19	GCTTTCAGCTAAATAATAAAAAATCCTCCTTTTACAAGGAGGATTTTTTTG	-17.4	100	ydhK+35
625626	-	10.19	CTCGTCACGATGTTTACATTAGCTGGCCACTACACGCTTTACGCTTACTTT	-4	12.13	pbuE_CDS
625898	-	11.06	TTGCCCCGAAAATTGTAGCGCCTGAATACAGAGCCCGCGCAATCGGAATTA	-11.7	13.81	pbuE_CDS
626325	-	646.81	TCCTGATTACAAAATTTGTTTATGACATTTTTTGTAATCAGGATTTTTTTT	-21.8	41.65	ydiF+18203
633919	+	53.38	AATGTCACAATTAAGAAGGTGCTCAAGAAGTTTCTTGAGCACCTTCCCACT	-24.3	78.38	gmuG+57
635185	+	589.56	CGTTTGACTACGGATCAAAAGGTTAGGGGTTCGACTCCTCTCGGGCGCGCC	-9.8	4.57	gmuG+1323
635274	+	31213.4	CTCAGCCTTCCAAGCTGATGTCGTGAGTTCGATTCTCATCACCCGCTCCAT	-11.4	49.23	gmuG+1412
635293	+	735.06	GTCGTGAGTTCGATTCTCATCACCCGCTCCATTATTGAATGATCTTTGAAA	-5.2	15.84	gmuG+1431
635377	+	23.44	TTTTTGAAAATCGCACAGCGATGTGCGTAGTCAGTCAAACTAGGGCCTGCA	-11.6	21.45	gmuG+1515
635398	+	105.13	TGTGCGTAGTCAGTCAAACTAGGGCCTGCACGATGCAGGTCACACAGGTGT	-14	24.11	gmuG+1536
635432	+	211.75	GCAGGTCACACAGGTGTCACCGCGGGATGCGGTGGACTTAACCTGTGATCC	-21.9	49.28	gmuG+1570
637053	+	240.81	ATATAAGACCTTGGGTCTTATAAACAGAACGTTCCCTGTCTTGTTTAGTTT	-13.6	50	gmuG+3191
637156	+	30.75	ATCACATTCAATTAGTAATACAAGATATCACATAGTGATTCTTTTTAACGG	-5	52.27	gmuG+3294
637317	+	12.56	TCCGAATGGGGAAACCCACCACTCGTAATGGAGTGGTATCCATATCTGAAT	-16.6	10.87	gmuG+3455
640081	+	17.75	GTGTGGCGACACATGGAGCTGACAGATACTAATCGATCGAGGACTTAACCA	-8.8	100	gmuG+6219
640253	+	11.13	CGCCGATGGTAGTCGGGGGTTTCCCCCTGTGAGAGTAGGACGCCGCCAAGC	-15.1	0	gmuG+6391
640345	+	9757.88	TCGGGCTCATAACCCGAAGGTCGCAGGTTCAAATCCTGCCCCCGCAACCAA	-18.1	33.63	gmuG+6483
640482	+	14630.6	CCTGCCTGTCACGCAGGAGGTCGCGGGTTCGAGTCCCGTCCGGACCGCCAT	-20.9	63.81	gmuG+6620
640519	+	745.94	GTCCGGACCGCCATTAATGTAAACGAAACGATCATGTTTTCGTTTTTTTTG	-7.1	44.49	gmuG+6657
640567	+	96.13	TTGTGTTTTCTTTTACTGTATCTTCTGCTTGGTGTCATAGCCAAGCTTTCT	-11	13.59	gmuG+6705
644314	+	120.75	TTGAATTGACTTCTTATCAAAGTCTCACGAGATAATAGCGTGAGACTTTTT	-14.7	84.48	gcp+16
644492	-	51.25	ACAGAAGAAGATTAAAAAAGTCAAGCACCTCTTTTTAGAGGTGCTTTTTAT	-17.4	92.86	ydiF+36
647148	+	11	AGGATCAATCAAAAATTCCGCAGGCGACGGCGAAACGGCTGCCGCTTTACT	-13.9	0	ydiH_CDS
648335	+	14.25	CTGTTTTTAGCGGGCTTATCTTTTTCATATTATATTTTATTTCCTTTTGTT	-2	0	tatCY_CDS
648704	-	207.19	GAACCAAAAATAAAGAAAATCCATTTCTCGCATGAGAAATGGATTTTTTAT	-19.7	96.49	ydiK+38
648743	+	598.81	TCTGGGCAATAATAAAAAATCCATTTCTCATGCGAGAAATGGATTTTCTTT	-17.5	96.51	tatCY+39
649552	-	13.94	CGCGATTCCCTTGTTATTTAAATTCGGTTATGCCGGAGGACAGCCTACAGA	-7.4	0	ydiL_CDS
649973	+	17.13	TCGCGTTGTCATTGAACTCGTAGAATCTGAAGAAAAAACTGCCAGCGGAAT	-5.5	2.02	groES_CDS
650000	+	34.19	TGAAGAAAAAACTGCCAGCGGAATTGTGTTGCCGGATTCTGCAAAAGAAAA	-9.3	0	groES_CDS
650163	+	19.44	GGTACTGAAGTGAAATACGAAGGTACTGAATACTTAATCTTACGTGAAAGC	-6.7	26.08	groES_CDS
650207	+	32.06	TGAAAGCGACATTTTAGCTGTTATCGGCTAATTCTTAAATAAACAATACTT	-7.5	0	groES+20
650332	+	11.06	CGCGGTGTCGATGCACTTGCTGATGCTGTTAAAGTAACTTTAGGACCAAAA	-10.2	8.56	groEL_CDS
650536	+	15.25	GGTGACGGTACAACAACTGCAACAGTTCTTGCGCAAGCAATGATCCGTGAA	-9.2	27.62	groEL_CDS
650545	+	15.5	ACAACAACTGCAACAGTTCTTGCGCAAGCAATGATCCGTGAAGGCCTTAAA	-7.4	11.32	groEL_CDS
650572	+	12.25	GCAATGATCCGTGAAGGCCTTAAAAACGTAACAGCAGGCGCTAACCCTGTA	-5.6	2.43	groEL_CDS
650628	+	33.88	GCGTAAAGGGATGGAACAAGCTGTAGCGGTTGCGATCGAAAACTTAAAAGA	-5.7	0	groEL_CDS
650905	+	12.88	AAGATGGAAGCGGTTCTTGACAATCCTTACATCTTAATCACAGACAAAAAA	-9.2	18.14	groEL_CDS
651013	+	19.81	CCATTGCTTCTGATCGCTGAGGATGTTGAAGGCGAAGCACTTGCTACACTT	-8.9	0	groEL_CDS
651135	+	13.69	AGCAATGCTTGAAGACATCGCTGTCCTTACTGGCGGAGAAGTCATCACAGA	-13.6	0	groEL_CDS
651320	+	31.88	AAATCCGCGCTCAAGTGGAAGAAACAACTTCTGAATTCGACAGAGAAAAAT	-9.6	0	groEL_CDS
651491	+	19.88	CAGCTGTTGAAGAAGGCATCGTATCCGGTGGTGGTACAGCGCTTGTAAACG	-9.9	0	groEL_CDS
651687	+	27.13	CGAAGAAATCGGCGTAGGCTTCAACGCTGCAACTGGCGAATGGGTAAACAT	-8.8	0	groEL_CDS
651762	+	28.31	AACAAAAGTTACACGCTCAGCTCTTCAAAACGCTGCGTCTGTAGCTGCAAT	-14.5	0	groEL_CDS
651936	-	79	GAAAAGGTCTCCCAACAGTTTAGTAAACTGATGAAAGACCTTCTCTTTTTT	-16.5	60.61	gutR+12839
651965	+	10.69	AAACTAGACAAAGCGTGAATAAAAAAAGAGAAGGTCTTTCATCAGTTTACT	-5.5	0.06	groEL+97
651990	+	4560.63	AAGAGAAGGTCTTTCATCAGTTTACTAAACTGTTGGGAGACCTTTTCTCCA	-26.5	92.11	groEL+122
652090	-	42.63	ATAAAAAGAATGTCACCCCCCACTCTTTTAGGCATACCCATACCTCCTTAC	-4.4	5.81	gutR+12685
652221	+	16.94	AGTCTCAATAACCTTTCTTAATTGCGGATGACCATCCTCCCGCTCAAAAAT	-5.7	40	groEL+353
657725	-	72.06	AAAAAATTAAAGATAAAAAACGGAGCTGGTTTTATCCAGCTCCGATACTTT	-18.4	75.41	gutR+7050
657761	+	410.5	AGAGAGCATACTAAAAAGTATCGGAGCTGGATAAAACCAGCTCCGTTTTTT	-20.3	90.74	ydiP+64
657949	-	12.31	GAGAGACTGTGGAAGGCCCTGAGGAACTCATGGGCCTTCCACAGTCAAATG	-36.3	0	gutR+6826
658762	+	50.19	TCTTTTCCCACCGCTACATGCTTGTAGTTCATTGCCGCCAAGGCCATTGCA	-11.9	19.29	ydiP+1065
663328	+	203.13	CAAATTTTCAAGGCTTCTCATGAGTTCACCGAACTTGTGAGAAGCTTCTTT	-22.9	55.13	ydjA+301
663606	+	58.81	TAGCTAAAAGACGATGTTTTCCTTGCAATAAGGAACTCGTCTTTTATGTTA	-18.2	0	ydjB_CDS
664731	+	50.06	ACTTTAATAAGAAACGAAAGGCCAACTGCGACTTCAGTTGGCCTTTCCTAT	-21.9	84.21	ydjC+62
671102	+	26	CATTGAAGATGTTTCTTGAAAGTCTTTGGACTTTTGGGGGCATCTTTTTTT	-19.6	90.91	ydjE+53
671967	+	30.56	CTCGATAAGTAATACATAGGAGGCCGCAGCTTTCGGCTGCGGCGTCATTTT	-21.8	0.25	pspA+39
674835	+	125.94	AGAATCATACAGTGAAAAGTCCGGAGTGATCAGCACTCGGGACTTTTTTAT	-19.8	91.94	ydjI+50
677867	-	515.19	TAACTAATTTGAAACCAAAAAGAATCCGCACTCGGGTGCGGATTCTTTTTT	-21.4	98.16	bdhA+44
677909	-	13.06	TCTTATTAAAGAGAAAAGCCAAGTCAAAATCCTTGTTAGACCTAACTAATT	-3.9	38.97	bdhA+2
678774	-	14.75	AATATCTGGGCGGCCCGATCTTTATTCCGGTTGACAAACCGCACCCATTAA	-10.3	4.48	bdhA_CDS
679061	-	10	AGACCCTTTTTTCTTTAAAGTTTCTTTTTTTCAAAAAAACGTAGATTATAT	-1.4	0	ydzJ+1846
679112	-	14.06	CATAGCTATGTAAACGATTGATACTCTCATATAAAGAAAAAAGAGTGTGCG	-5.2	0	ydzJ+1795
679766	+	25.19	ATACCCATTAAGCAAAGGTAAAGTAGCGGGGCATTACAGCTATTAATGTAC	-7.9	21.07	ydjM+5
679810	+	1172	AATGTACATATATAATCTGGAAAGCAAGAAGTCACATTCTTGCTTTTTCTA	-13.3	69.4	ydjM+49
680877	-	27.44	GCCCTGCACCTCATCCATTAAAAAAGCCACTCAGCTCATGCCGAGTGGTTT	-15.3	62.5	ydzJ+30
680909	+	199	TTTGTGATTAACTAATAAAAACCACTCGGCATGAGCTGAGTGGCTTTTTTA	-16.9	75.96	ydjN+36
681107	-	572.25	CCAAATACGAAGAAAGAAGCCCAAAACTGTAAACGTTTAGGGCTTTTTTGT	-15.6	94.16	ydjO+148
681319	-	13.31	AAAAAACTTCGCCAGCAGTGATACGCCATTGTGCCCTTTGTGCGGAAGTAA	-11.5	0	ydjO_CDS
685112	-	20.13	TGCCTTAATGCTGATCAAATCCTAAACGGCCTGCCGTTTAGGATTTTGTTA	-19.7	92.31	gabP+43
692701	+	218.69	ACGGCCTTGCCAAAGAGGGCGGAGCGAGCTTCATATCTGTCCTCGTTTTTT	-16.9	0	yebA+124
692740	+	10.31	TCCTCGTTTTTTTCTGTGTCAAAAAACTTAGAGGAGATTAGGTGACAACCA	-11.7	16.44	guaA_CDS
692880	+	49.88	GTTTACAGCGAGCTGCATCCACATACATTGACGGCTGAAGAAATTAAAAAA	-6	0	guaA_CDS
693095	+	12.38	AAGCCAGCGTGAATACGGAAAAGCAAACATCCGCATCGAAGGCACACCTGA	-9.2	6.67	guaA_CDS
694295	+	11.44	TACAAGTAAGCCGCCTGCGACGATTGAGTGGGAATAAGAATCAATTAATGG	-4.8	59.58	guaA+14
694338	+	1127.63	ATTAATGGAAACCATCTTTTTGGCAATTTTGCCGGGAAGATGGTTTTATTT	-25.2	97.97	guaA+57
694589	+	342	ACACGGTTATTTATTCAAACTGAAATCCGTCTGTAGTCAAGCGTCCCAAAA	-3.9	3.89	guaA+308
694608	+	2126.56	CTGAAATCCGTCTGTAGTCAAGCGTCCCAAAATGTATTGGGACGTTTTTTA	-15.6	34.88	guaA+327
694743	+	14.69	GCACCAGCTATCGCAATGAAATCATTGGCGGATTAACGACTTTTTTATCTA	-6.8	18.12	pbuG_CDS
696024	+	328.19	TCTTAAAATAAGGAATGAAAAACCAGCTGCACTGGCAGCTGGTTTTTTTGT	-21.9	98.14	pbuG+40
697033	+	23.81	GTTGATTCCGCTTTAATGAAAAAACCGGCTAATCCTAGCCGGTTTTTTTAT	-20.6	100	yebC+35
697369	+	17.81	ATCTGACAATAGATATAAAGAGGTGAGTCTGCTGAAAAGCGGGCTTTTTTG	-13.5	100	yebD+45
698463	+	119	CATAAGTTTCTACCCGGCAACCGTAAATTGCCGGACTATGCAGGAAAGTGA	-11.2	0	yebG+174
698546	+	18.63	CGAACGACTGACGATACATGTACCATGCCCGGTTTGTATTGCTTCCTCATA	-8.5	8.53	yebG+257
698572	+	497.81	GCCCGGTTTGTATTGCTTCCTCATAAGTGCAATGCAGAGCGGGTATTTTTT	-23.5	55.76	yebG+283
701553	+	58.13	CTTTGAACGTTTAGGTTTAGCATAGAAGAAGCTTTTAGCGGCTTCTTCTAA	-17.9	4.52	purB+26
702872	+	17.31	GTCTGTAACGGATTCCAGATTTTACAGGAGCTTGGGCTGCTGCCAGGCGCA	-15.4	0	purQ_CDS
706919	+	14.69	TAAAACTTGAAAAATGACATAAAGGCAGCGCAGTTCGGCTGCCTTTCTCTT	-15.1	2.65	purF+48
711418	-	52.88	TCCCGCTTTTTGATAACAAAAAACCCGCAGCTATTCTGCGGGTTTTCCTCA	-16.5	85.19	yezC+38
711453	+	50.13	CTGCCCAAAAATAAGTGAGGAAAACCCGCAGAATAGCTGCGGGTTTTTTGT	-19.1	93.75	purD+37
713828	+	11.38	TATGTAAAACAATGGCTGAAAAAAAACATTTGGATTTATCAGGACCGCATT	-2.5	0	yerA_CDS
713846	+	15.69	AAAAAAAACATTTGGATTTATCAGGACCGCATTGTTTATGTGGGTCATGAA	-10.6	0	yerA_CDS
714027	+	36.06	AATACGGAACAACGACATTCGTGAATGATAACTTATTTTTGCTTTTGCAAA	-6.5	3.1	yerA_CDS
715512	+	66.75	GTGTTTCGTGTTTTTTCTGCTGGTATCCTGCCAGCAGAAGGATGCTGTCCC	-20.7	0	yerB_CDS
715740	+	17.56	TCTGGCCATTTTCCAAAGCCAGATGCCTGAAACTGTCGGACCTGTGCGGAG	-11	2.06	yerB_CDS
716091	+	16.44	TCGGGTAGATTATGGAACAAATAACGTTACAAATCTTGTCGAATACAACTA	-8.1	0	yerB_CDS
716781	+	877.75	TCTTCTTCCAAATAAAAAACCGCCCTGCCGTCTGGCAAGGGCGGTTTCTTT	-23.3	80.21	yerC+36
724609	+	20.94	GAATATTTCCCGAACTATACAGGCGTTGTCGGTACAGCGCTGTATGAAAAT	-14.5	0	yerH_CDS
724865	+	262.13	TTTATGACTGATAGAAAACCCTTGTGCCATATTGGCACAAGGGTTTTTATG	-25.6	97.3	yerH+40
725989	+	10.94	GAAGAGATATAGAGAATGGCACGCCGATTACAGCATTTGATTTTTCAGCAC	-3.2	69.29	yerI_CDS
725999	-	23.38	TGTGATACATTATAAAAGCCAATGGGACTGGAATCCCATTGGCTTTTTCTA	-21.4	90	sapB+36
726039	+	77	CTGGTGTAGATAGAAAAAGCCAATGGGATTCCAGTCCCATTGGCTTTTATA	-23.5	70.73	yerI+42
726801	-	27.06	CGCAAAAAGTAAGCAATAAGCCATCAAGCGCAGCTTGGTGGCTTTTGTGCT	-22	88.89	opuE+39
729053	+	10.56	TGCCATCAATTCTGGACTAAAGGAGGGACACAAGAATGTCATTATTTGATC	-5	0	gatA_CDS
729923	+	13.94	CTGTCTTGGCAGCGCTGAAAGTCCTTGAAGGTCTCGGCGCTACATGGGAAG	-16.1	0	gatA_CDS
731635	+	15.75	GCTTGCCGATGTTGCCCTGACACCTGAAGGCCTTGCCGGCATGATCAAATT	-10.6	0	gatB_CDS
731919	+	140	AAGCGTCCAAAGGACAAGCCAACCCGCCGATGGTCAACAAAATTCTGCTTG	-6.2	13.23	gatB_CDS
731972	+	711.38	GAAATTAAAAAACGCTAATAAAAAAGCAGCCCTTAGAGGCTGCTTTTTTTA	-16.5	100	gatB+33
733051	+	37.06	GGCTGATGACGATTATTGTAACGGCAGCCGGCTTGTATGCGGGTATGAATA	-13.5	3.93	swrC_CDS
733139	+	15.56	CTTGACGATCAGCACGACATATCCGGGTGCAACACCAAGCCAAGTGGCTGA	-10.5	0	swrC_CDS
733242	+	13	GTTGTGACGTCGACGTCCTATGAAAACGCATCGTCGGTCATGATTGAATAT	-11.7	0	swrC_CDS
733969	+	16.44	ACGATGCGAATACGGTAGAGGTTGCCGACGATGTCAAAGCTGAGCTGAAAA	-7.2	0	swrC_CDS
734909	+	14.63	CAGCCCGCTTGCCGGAGGAGATTCTAACGGTGCGTTATTCTATATCAAATA	-10.5	0	swrC_CDS
735098	+	10.69	TGGCGATTCTGAAAACGATATTAAAGACACGGTCAAAGACATTGAAAAAAT	-3.1	0	swrC_CDS
736149	+	464.44	ACGGAAGAAGAGTAAAAAACAAAAAGCCTCAGCTCTGCTGAGGCTTTCAGC	-17.5	36.42	swrC+36
736323	+	88.88	GTTAAGGATGACAAAAGCTCAAAACAAGAATCAGTTTTGAGCTTTTGTGCG	-20.7	60	swrC+210
737051	+	13.19	GTGAAATCATGCTGTTTTTGGTCACGCTGACAAACTCCGTCGGCGGGTTCG	-12.2	0	yerQ_CDS
737096	+	12.94	GGTTCGAAAAGCTCGCGCCGGATTCCAGCCTGAATGACGGCATGTTTGATT	-10.3	0	yerQ_CDS
737386	+	29	TTGGATGACTAAAACTTGGCTTGGTAAGCCAAGCTCAGAATGTTGACAAAA	-11.5	15.37	yerQ+39
737420	+	220.25	TCAGAATGTTGACAAAATCCTAAAACAGTTTTCGTTTTAGGATTTTGTCAT	-22.4	6.46	yerQ+73
737577	+	96.19	AAGGTTTGCCTACACGCTGAAACTTGGCTTGAATAGGCCAAGTTTTTCTTT	-16.5	3.41	yerQ+230
739061	+	47.5	GTTGGTTCTCTAAAACGATAATTGATTTCAATGGTTCCATTTGCATGTACT	-2.3	4.07	yefA+79
739318	+	104.38	AACACCATTAGCAAGAGAGATAACTAAATTGGATTTATCTCTCTTTTTATC	-11.9	42.86	yefA+336
739627	+	45.44	GCAAACCGCAGTATTTGTAAAGAGATGTACTTCAGCTTGAGGTCTCCTTCT	-7.6	10.82	yefA+645
747037	-	59.88	GGTCTATAATTAAAAAATGGCTCAGCCCTACTCTGCTGAGCTATTTTTTAT	-21.1	40	yezG+42
747079	+	36.19	ATTGGTTTATAAAAAATAGCTCAGCAGAGTAGGGCTGAGCCATTTTTTAAT	-17.4	18.75	yeeC+1080
752264	+	31.5	CCTTACAAACTTAGTGATCAGAAGAAAGCCCTTAGCTAGGGCTTTTTCTTG	-16.4	0	phrH+12
753164	+	226.88	GTTGATTTAGGTGAGTAAGGAGTGAGCAGGCTGTTATGGCCTGCTTTTTTT	-15	82.8	yeeI+33
754431	+	53.88	AGTTTATCAGTGCTTGATTAACATGTGGTAAAGGATTCTTTGCCCATGTAT	-14.5	5.26	yezE+30
755606	+	10.88	GAGCATGTCAGCATTTCTCGTTCCGAGCTGCAGCATAAAATGGAGGCAGGA	-9.6	6.67	yesF_CDS
757681	+	75	AGAAAGAGATTACGGCAGAATAAGCGTCCTTTGCAGGGGGCTTTTTTGTCT	-16.6	53.75	yesK_CDS
785084	-	628.69	ACAAGGGACATACAATCAATAAAAAGCTTGCGCCTTGCTGCAAGCTTTTTT	-14.2	87.47	yetG+29
785504	-	94.44	TTAAAAGAATAAACTGTTGCGCACGGCGGTTCGATTCCGCCCTGCGCTTTC	-19.3	19.4	yetH+39
787613	+	218.56	AGTTTCCAGGCATATGATTGTCCGTCACCGGGTGATCATATGCCTTTTTGA	-22.4	97.62	yetF+2537
788098	+	40.13	CTTTGTCTTCACATTGCTGATCGCGACTGTCGGCCTTTTTATCGGCCAATT	-12.5	0	yetJ_CDS
788131	+	37.94	CCTTTTTATCGGCCAATTTGTTCCTGTCGCTTTGATGCTGCCGCTTTCTAT	-3.8	0	yetJ_CDS
788154	+	13.06	CTGTCGCTTTGATGCTGCCGCTTTCTATTCTTGAAGTGGCGATGATTATTC	-13.3	18.67	yetJ_CDS
788305	+	52.19	CGCTTCCATCGCCGGCGCCTATGTCGTGCTCGAAGCCTTTGGCTCTACATT	-12.1	0	yetJ_CDS
788343	+	19.06	TTGGCTCTACATTTGTCATTTTTGCCGTCTTGGGCACAATCGGCGCAAAAA	-13	0.84	yetJ_CDS
788495	+	27.38	GCGATGATGGCGTATTCCGTGATCGGAACCATCGTCTTTTCCCTTTACATT	-16.4	0	yetJ_CDS
788674	+	1163.75	CAGTGATGATTAATGAAAAAGCGTCTGTCATTGGATAGGCGCTTTTTGCCA	-18.9	59.85	yetK_CDS
789580	-	27.44	GGCTATAGCGTCTTTTCTTCTGCAGCCGGATACGCATCCGGCTGTTTTTTC	-18.5	65.85	yetL+72
789653	+	79.94	CGGCTGCAGAAGAAAAGACGCTATAGCCTGTCCGGATCGGACGGGTTTTTT	-15.1	84.78	yetK+25
791430	-	67.56	TAAAACAGAGCAAGACTAAAAAGTCCAGAAATCACTTTCTGGACTTTTCCT	-16	55.32	yetN+32
791466	+	13.69	GAAGGGTATTAAATAGGAAAAGTCCAGAAAGTGATTTCTGGACTTTTTAGT	-18.6	100	yetM+39
796225	+	140.19	ATATTCCGGCTTGCCGCGGTGTATTTATTGTTGTGTGATGCCTTGATTTTG	-9.6	0	yetO+358
796342	+	18.75	GTTTAAGAAAGTAGAGGTTGCCATGAAGAAACTTTTTTCTTACAAACTTAG	-6.9	0	ltaSA_CDS
796543	+	24.56	GCTGGCGAAAGGGCGTAAATCAGCCATTATTATGCTGATTATCGATTTCTT	-11.3	17.1	ltaSA_CDS
796825	+	11.13	AGTGATCCTTTCTGGGATCGCACTGTTTTTCATCAACCTGCACTATGCGGA	-16.8	0	ltaSA_CDS
796871	+	29.88	GCGGAAAAAGACCGTCCGCAACTGCTGACAAGAACGTTTGACCGCAATTAT	-10.8	0	ltaSA_CDS
797130	+	10.56	CATTCCTGATTGACTACAAGCTAAACGGTGAAGAGGTGACGCCTTTCTTAA	-6.7	0	ltaSA_CDS
797290	+	16.25	CGGTCTTCCTGAAGGCTCCGCGTTTGTGACGAAAGGCGAAAACACCTACCA	-12	5.32	ltaSA_CDS
798232	+	20.75	AGCCGTTGATCCGTCAGACTATCATTACGGCAAGGAGAAAGAAATCAAATA	-8.3	29.34	ltaSA_CDS
798285	+	89.56	ATGAAAAAGAGCCTTGAGCGGGCGCATTGCCTTCGCTCAAGGCTCTTTTTT	-33	97.5	ltaSA+52
803284	-	245.56	AGAGAATGGCATAGCTGAAAAAACCCCTGCCAGGCGGCAGGGGGTTTTTTA	-22.9	91.1	yfnC+33
803319	+	11.5	TTTATCCAGCTGGATTAAAAAACCCCCTGCCGCCTGGCAGGGGTTTTTTCA	-25.8	90	yfnD+33
804638	-	63.81	TTTTGAATATCGAAAATACCGTCAGCTGCTAATCAGGCTGACGGTATTTCT	-22.6	74.42	yfnB+19
805415	-	98.19	AAACAAATAATCTCTTTTCAGCCGGCGGTGCCTCACCCGCCGGCTTTTTCC	-20.3	75	yfnA+41
806002	-	13.69	ACGGTTCTGTACATCGCGGTATCGCTTGTGCTGACAGGCATGATGCCTTAT	-16.8	12.52	yfnA_CDS
809455	+	284	GCGCTTGAGGAAGAGTAAGAGACCGGGGACAAACATCCCCGGTCTTTTTCT	-25	87.29	yfmS+33
811480	+	59.88	AAGAACTGGAAAGCTAAAAAGCGTGGCCGCAGCAGGCCGCGCTTTTTTTCA	-22.7	53.16	yfmR+34
812061	+	192.69	CTTAAACAGGAAAGTGAAAGACGGGTGCTGTATGCTGCTCGTCTTTTTTAT	-15.9	97.5	yfmQ+46
812599	+	38.25	AATCAATCGAATGAAAAGTTTGTTAAACGCTATTTTTGTAGCGTTTCTTTT	-10.8	24.8	yfmP+37
813855	+	19.31	AGGCGGGGCATTAATAACGAAAGACACTGCGCATATGCAGTGTCTTTTTAT	-17.9	84.21	yfmO+37
814343	-	30.69	AGTGCTTTAATTTATAAAAAAACCCGCCTGCTAAAGGGCGGGTTTTTTACT	-20.5	100	yfmM+41
817271	+	161.13	GCGGAAAACTGAAGACGAAATAAAAAGAAGGGCGAAGAGCCCTTTTTTTGT	-15.1	80.65	yfmL+28
817770	-	210.5	ATCCGAGCTGAATGAAGATGAAAACGGGAGGGCTTTTTGCCCTCCTTTTGT	-16.4	95.76	yfmJ+40
817801	+	29.19	CAACTGATCTCATCGAAACACAAAAGGAGGGCAAAAAGCCCTCCCGTTTTC	-14.6	20.93	yfmK+44
820838	+	31.13	TGAAAAATGGTAAACACTTAGGGAATAGCATTTAATGCTATTCCTTATTTC	-16.1	39.34	yfmK+3081
822381	-	43.63	ATTTAAAATAAAATCTTGTAGAAAAAACATTGTTTTTTCTACAAGCTGAAC	-14.9	36.62	yfmF+522
822853	-	235.81	AAAAGGAGAGGAATTCCCTAGGGCTGTCGAGAAACGTGACAGCCTTCATTT	-17.6	40.91	yfmF+50
823749	-	12.13	GAAATACCTGCCGGAATACTGACAGCCGTGATCGGCGCGCCTTATTTCTTA	-10.2	0	yfmE_CDS
824325	-	20.94	GAGTCGCCGGTATACGTGCTTCCGTTCTCCGCATTTGCCGGAGCCGCCATT	-13.1	4.08	yfmE_CDS
825748	-	1420.56	TATAATAAATAGGACAAATGAGAAGCGAGGGGAATCCTTGCTTCTTCGTTT	-20.2	62.67	yfmC+39
825796	-	10.19	GGCATCAAGTCTAGTGAAACAAGCGCCAAAGATGTGCTTAAAAAAGTGTAT	-6.5	3.22	yfmC_CDS
825798	-	10.19	GAGGCATCAAGTCTAGTGAAACAAGCGCCAAAGATGTGCTTAAAAAAGTGT	-8.1	2.83	yfmC_CDS
826065	-	18.5	ATTCCTTCCAGCTTCATACATCATCATCCTATGACGGAGAAATCTTTAAAA	-2.8	3.23	yfmC_CDS
826085	-	26.69	TCTCGGCGTTGCAAGAGCGGATTCCTTCCAGCTTCATACATCATCATCCTA	-7.2	0	yfmC_CDS
826277	-	24.38	GCTGAAAAAAATCGCCCCGACGATTGAATTAAAAAGCCGTGAAGCGACATA	-6.2	11.52	yfmC_CDS
826337	-	12	TTCCTTGAAGCCTGATTTAATCATCGCTGACGCTGAGCGCCATAAAAACAT	-5.6	0	yfmC_CDS
826399	-	22.56	GGCAGCTCCATTGATTACACATCTGTAGGCACACGCAGCGAACCCAATCTT	-5.6	3.07	yfmC_CDS
826468	-	80.81	CACAATCTCGGCATTACGCCGGTGGGCATCGCAGATGACAACAAAAAAGAT	-9.7	0	yfmC_CDS
826559	-	13.5	CAGAGTGATCCATGACGAAGAAGGAAAAACGACAGTAAGCGGCACACCTAA	-3	0	yfmC_CDS
829298	+	320.94	TAAATTAAGAAAGTGAAAAACACAAAGGGTGCTAACCTTTGTGTTTTTTAA	-18.5	84.62	pel+43
836559	+	14.81	TGGCAAATCGGTTATCGTCTATTTGACACCCGCACCACGCGGGTGTTTTTT	-16.6	85.71	yflN+25
838741	-	89.31	CAATCTTAAATATGGCAAAGCCGCGCACGTTGATATGCGCGGCTTTTTTCT	-19	100	yflJ+42
838780	+	48.31	GCCGGTTGAATAGAAAAAAGCCGCGCATATCAACGTGCGCGGCTTTGCCAT	-22.2	30.95	yflK+38
839304	-	151.63	GGTTGATAAACAATAAAACATGAGCCGGGCGATATGCGCCCGGCTTTCTTG	-21.2	61.63	yflH+35
839338	+	30.81	CGGGCTGTGACAATATCAAGAAAGCCGGGCGCATATCGCCCGGCTCATGTT	-18.6	85.71	yflK+596
842011	-	465.38	AACGAAGATAAATAAGAAAAAGCGGAGAGGTTGCCCTCTCCGCTTTTTTAT	-24.3	98.6	yflE+36
842048	+	162.31	GGGCTGCTGTCAAATAAAAAAGCGGAGAGGGCAACCTCTCCGCTTTTTCTT	-26.4	94.23	nagP+34
842052	-	32.75	ACACAAAACATGACGAAGATTCTTCCGAAACGTCAAAGGATAACGAAGATA	-4	70.94	yflE_CDS
842192	-	11.13	CGATGAATCCGAAGTCGACAAGTCAGAAGACTCACTCGTCAAGAAGGAACT	-7.2	0	yflE_CDS
842215	-	10.19	GACACGAAAACCGGAAAAGAACTCGATGAATCCGAAGTCGACAAGTCAGAA	-6.2	0	yflE_CDS
842273	-	21.13	GTTCCGAAACGGAGACTTTATTTCACCGAAGTACACGAAAATATCCGGTAA	-6.8	1.46	yflE_CDS
842447	-	19.63	TCAACGGGTGCCGCTCTTTATCCACGCTGCCGGCGTGAAGGGCGAGAAAGT	-16.1	0	yflE_CDS
842711	-	17.19	CTTCCCATTCGGAATGGATGAGGGGGATACAGACTTCCCGGCTGGAGACTT	-12.6	1.07	yflE_CDS
842888	-	47	CGAAATGTACAAGGCGGAAGGCATTGATAAATTCTTTGATTCTGCTTACTA	-11.4	0.06	yflE_CDS
843101	-	37.19	GTTCTACTTTGATAACTTTTTCCACCAAACGGGACAAGGTAAAACATCTGA	-8.5	3.06	yflE_CDS
843319	-	12.25	AGCCAGCGCGCGCTTGCCGATTCCAGCGACGTAACGGAAGTAGAAAACTAC	-9.3	0	yflE_CDS
843614	-	37.69	ACTCGGTGACAGCGCATTTTCGCTGATGAGACCGACTGACGCCTTTTACTT	-12	0	yflE_CDS
843763	-	48.56	TTGTTCAAGAAAAAATTACAGCAGACAGCCATTATAGTGATTCATTTTTTA	-2.4	0	yflE_CDS
843822	-	17.06	AAATATTGCTTTTTGTGAATCCTCTTAGCTCAAGCTTGTTCTTTCTTGGCT	-4.1	0	yflE_CDS
843868	-	44.81	GGTTATGTCCTGAATTTCAACTTAGGAATAGACAACACGATACAAAAAATA	-7.7	1.32	yflE_CDS
844691	+	18.06	GCTGATTTGTCTTGTCTGCAGGATGGCGATTGATAAAAGCCATCCTTTTTA	-16.7	60	yflB+46
850425	+	14.44	ACTGAACAAATCGGCACGTCAGATTGTCGAAGCAGTCGGCGGTGCTGAAAA	-19.1	0	treP_CDS
850516	+	18.13	GCTTTAATAGATGAAAGCAAGGTTGACCAAGAGATGCTTGATCAAATTGAT	-9.2	13.32	treP_CDS
850580	+	274.75	CATTCTCGACAAACGGACAGTTTCAGGTCGTAATCGGCCAGGGAACTGTCA	-21	0	treP_CDS
850665	+	17.5	GATTGGCGAGTCAACAAAGGATGAAGTGAAGAAGGCCTCAGAAAAAAATAT	-3.8	0	treP_CDS
850674	+	19.19	GTCAACAAAGGATGAAGTGAAGAAGGCCTCAGAAAAAAATATGAATCCTTT	-5.3	1.01	treP_CDS
850841	+	29	GCACAAAATCGATTGTGCAGGTTTATCCGCAGTGGGCGGATCTTGCTAATA	-17.5	0	treP_CDS
850970	+	28.31	GCAATCCGCTTCTCGGCATTGTGCTCGGGGTTATGCTCGTGCATCCTGATT	-14.8	0	treP_CDS
851185	+	13.56	ACACCTGAGGGCATACAGCTGCTCGTTGTCGCACCAATTACGCTTCTCTTA	-8	0	treP_CDS
851224	+	18	ACGCTTCTCTTAACAGGATTTGCCTCTTTTATCATTATCGGCCCGATTACA	-2.6	0	treP_CDS
851547	+	165.38	CACATCAGGGATTTCTGCTTATCTTGGCATTACAGAGCCTGCCATCTTTGG	-11.2	1.74	treP_CDS
851579	+	15.69	CAGAGCCTGCCATCTTTGGGGTGAATCTGCGATACAGATTCCCGTTTATCA	-14.1	1.36	treP_CDS
851611	+	74.75	TACAGATTCCCGTTTATCATTGCAATGGTCAGCTCTGGCCTGGCCGGAATG	-11	0	treP_CDS
851780	+	40.69	TCGTGCCGTTTGCCGGAACATACGCGTATGCGAGATTCAAACATAAATAAC	-7.4	4.53	treP+1
851820	+	2324.44	ACATAAATAACAAGTGGGGAGCGGGACGTGTTGAACGTTCCCTTTTCCCGT	-18.9	28.88	treP+41
852127	+	11.94	TGAATACGGAACGATGGAGGATTTTGAGCGGCTAGTGTCCGAAGCACATAA	-5	1.52	treA_CDS
853215	+	21.94	CGGTTGCAGGAAATTACCGGGAAATCAATGCTGAAGCGGCGCTGAGGGATC	-9.4	22.06	treA_CDS
854017	+	18.13	ATTTTGGACAAGGATTACTTTTTCAGAAAGCATGTCCCTCACCTGACGAAA	-7.5	8.43	treR_CDS
854270	+	13	GACACCGTCTCGACAAATTCCGATTTGTTGATTTTGCGCGGCGGGGGAAAT	-13.1	29.2	treR_CDS
854306	+	1231.19	CGCGGCGGGGGAAATGAGAGAGGCGCCTGCCTGCGGCAGCGCGCTTTTTTG	-21.4	34.42	treR+34
855080	-	15.69	GAGCGAATCAGGCATAAAAAAGAGCTGCTCGCTATGCGAGCAGCTTTCTTC	-21.6	60	yfkN+34
855115	+	699.44	GAAGTGGGTTTAAAAGAAGAAAGCTGCTCGCATAGCGAGCAGCTCTTTTTT	-21.5	96.95	yfkO+38
860263	-	67.69	CTCAAGCCTAAGCAACAAAAAAACGGACGCCCAAGAGCGTCCGTTTTTTCT	-19.1	91.18	yfkL+40
861551	-	249	CTCGCTTCGTAAATAATGGAGACTGGCCGGAAACTCGGCGAGTCTTTTTTA	-17.9	31.34	yfkK+35
863862	+	42.25	GCTACCATTAGCATAAAAGCCTCCTGACATGATGTCGGGAGGCTTTTTGAT	-26.7	91.67	yfkH+199
867126	-	340.25	GAGAACCCAATAAACAAAAAAACTGATTCCGAGTTGGAATCAGTTTTTTAT	-17.3	99.24	yfkC+38
869485	+	147.25	CGTTTTAAAAAAGATTGGGAATAAAACCGCGTGCCCGCCGCGGTTTTTTTA	-11.4	64.54	yfjT+27
870352	-	52.75	AAATGTATAAAATAAAGAAAAGCCTCTCCGTTTAAGGAGAGGTCTTTCTCT	-19.6	75.86	yfjR+36
870390	+	25.06	CGTCTTTGTAAAAGAGAAAGACCTCTCCTTAAACGGAGAGGCTTTTCTTTA	-19.7	16.67	pdaA+40
871321	-	50.44	AGGATGGTTCAATATTTTTAAATGAGGACAGCGAGCAGCTGTTCTTTTTTG	-15.3	74.19	yfjQ+26
874624	+	25.38	CATTGTAGACCCGCCAAGAACGGGCTGTGACAGCACGTTCTTGGACACGAT	-19.3	2.01	yfjO_CDS
874890	+	128.19	AAGACCTGGATTTCGGTAAAATAAACAATTCCGATTTCCGGGTCTTTTTCG	-21.9	95.65	yfjO+88
875796	+	80.88	TTAATTATCTTATGAGTGAAGACTGCGACACTTAGTCAGCAGTCTATTTTA	-13.8	50	yfzA+102
877503	+	99.94	CAATTCTTGACTAAAATAAACCTGGATTTTCGGTAAATCCGGGTCTTTTTT	-13	42.47	dusC+100
877873	+	10.38	CGGTCATCCGGAAATCATGACAGCGGACGAGCTGCGCCGTCAATTTCACGA	-14.3	0	yfjM_CDS
878837	+	22.06	ATAAATACGTCGATCATTGTCAAAGGCCGGGTGATATCCGGTCTTTTTTTT	-15.9	50	yfjL+67
885809	-	17.5	TGCGCCGCGCGGATAACAAAATGGCCTGCTTATGAAGCGGGCCATTTTTGT	-23.2	100	yfjF+35
885846	+	42.31	AAAAGAGGATTAAACAAAAATGGCCCGCTTCATAAGCAGGCCATTTTGTTA	-18.7	76.67	sspH+38
891436	+	23.19	TTTTCGAATCTGTAATTGTATATAATAGAAAGAAAATGGGGGGATCTGATA	-7.5	2.86	malR_CDS
898908	+	47.5	TGTGATTTAACTGCAATCCCCTTGCCGAAATAACGGCAGGGGGATTTTTTA	-24	100	catE+41
905730	+	76	CGTTTTGCATATACGCTTCTCTGAAAAGGCCTTTTACAGGCCTTTTTTTCA	-13.3	89.29	yfiK+58
909121	-	119.81	ATGTACCCACATGCAAAAAAACATCTGCCTAAACGGCAGATGTTTTTTAGG	-20.6	65.85	padR+77
910698	+	152.56	TTAATATCTTCAAAAAACAACCTGCTGTCTCCGTTACAGTGGGTTTTTTCG	-11.2	89.33	estB+47
911928	-	87.5	GCGGATGAGAAGTAAAGAAACGCGGCAGGAGCCCTCCTGCCGCTTGTTTTT	-20.2	76.04	yfiR+36
914723	+	30.06	CGCCTTTTCTGAATATCCGCTGTCCGATAAGCGGCTGTTGATCTCATCACC	-10	41.38	yfiT+263
916078	-	42.69	AATAAATCAGTAAGTCTGTCATCCGCAAACTGCGGGAGCAGGCTTTTTTTA	-16.8	100	yfiV+46
919329	-	579.25	TAAAAACGAAATAAAAAAAGACTCCGTCTTATTAGACGGAGTCTTTTTTGC	-24	98.99	yfiY+37
919372	-	46.94	AAAGCCGCAAACTACCTGCTTGATGATATTGAAACCTACTTCTTAAAAACG	-1.4	47.5	yfiY_CDS
919540	-	18.19	GATGCTGATGTGCTGTTTTATTTCACTTATAAAGCCGATAATGCAAAAGAA	-5.7	0	yfiY_CDS
919952	-	14.13	ATTAAAGCCTGATTTGATTATTGGAAACAAAGTGCGCCAGGAAAAAATTTA	-5.1	0.13	yfiY_CDS
919983	-	13.38	AAACGGAACCGAATGTGGAAGCCATCGCAGAATTAAAGCCTGATTTGATTA	-6.2	0	yfiY_CDS
919990	-	13.56	GGTCTTGAAACGGAACCGAATGTGGAAGCCATCGCAGAATTAAAGCCTGAT	-5.7	2.28	yfiY_CDS
920105	-	10.13	AGGAACAGAGGCGCTCTTAGCGCTTGGCATTAAGCCGGTCGGAGCCGTAAA	-14.8	0.34	yfiY_CDS
922541	+	144.5	AAGAAATTCTTAATCGTTACACCCATTTTCTTAAAAAAGAAAATGGGTTTT	-15.1	89.19	yfhA+38
923660	+	10.63	TCAGCATTCAGTACTGAGGGACATCATACGCAGCAGAAGATCGATTCGAAA	-4.8	0	yfhC_CDS
924166	+	23.56	AGGCGCCGGAAGTGAAAAAACGCACACCGATCCGCGACCGATTCACTGAAA	-11.9	21.48	yfhC_CDS
924210	+	1014.5	ACTGAAATGTAAAAAACCCCTTGTCTCAAACGGAGACAAGGGGTTTTTCAT	-26.4	93.68	yfhC+39
926778	+	179.13	GCAAGAAAAAGAATAAAGCGTAACAGGAGGCTGATGATCAGCCTCTTTTTG	-14.7	68.04	yfhH+35
928111	+	96.88	TCAAGTCAATAAAGGGTAAAAAACAGCTGCAGTGTATGCAGCTGTTCTTCT	-16.1	50.79	yfhI+32
928688	+	78.56	AGCAGAGGCCTTTTGCATTAAAAACCTGCCGTTAACGACCGGCAGGTTTTT	-21.5	86.67	yfhJ+30
930631	+	33.5	AATAAGCTAAAATTTCTCTCCATCCGTCTGTCATAATGGCAGACTTTTTCT	-10.4	72.97	yfhM+46
931842	+	62.69	GACAAAAATGCACTGAAAATACCAAGCGCCATTGGCAGTGCTTTTTTTGCG	-14.2	7.96	csbB+35
934253	+	12.75	CTTTTCCTATCATCTGTCAAAAGACCAGTACATCATGCTTCCGATCCCATA	-3	0	yfhO_CDS
934441	-	71.13	AACTTCAGAAAAAATTAAAGCTCGGCTCTATATAGAGCCGGGCTTTTTACG	-21.3	88.06	yfhP+16
934480	+	147.81	TTTATATAAGACGTAAAAAGCCCGGCTCTATATAGAGCCGAGCTTTAATTT	-17.9	77.21	yfhO+16
936767	+	12.25	AATCTGGAAGATGGCAGGAGAAGCAGCCGCCATCTCGGCTGCTCCGTAAAC	-18	0	yfhQ+2
936845	+	55.56	CCGTGGCTGTAGTCCGCTTCATTGCGCTTCATTCCGCCGCGCGCTTCAATT	-12.3	0	yfhQ+80
936995	+	15.19	CAATCTTTTTTGGAAACCATGTTCAATTCGCTCATATCACGTCCGACATAC	-2.7	0	yfhQ+230
938146	+	15.25	CACAGCAGGTAAGACAGCAAAACCAATCTGCTGAACAAAACAAACAACAAA	-9.4	40.46	sspE_CDS
938206	+	99.63	CACTGAAACAGAAAAAAGCACTTCATCTTCGGGTGGAAGTGCTTTTTTCTG	-24.7	100	sspE+52
938806	+	35.81	CCATTCAAATTCACAGCTATAAGCACAACGGGCTGATTCATAGAATTTGGA	-9.2	0	ygaC_CDS
939306	+	157	AAATAATGGTTACGTAAAAACCTGTTGCGGGGTACAACAGGTTTTTCACAT	-15	28.54	ygaC+45
941136	+	145.63	AACTAAAACATCAATCTTATATCCTTTTAACGAAGGATATAAGATTTTTTT	-16.8	98.61	ygaD+45
941142	-	265.69	CTGCGAAATAGAAACAGAAGAGTAACCCGGTTAAACAGCCGGGTTTTTTTA	-15.5	100	ygaE+26
942093	-	16.75	GATTTTCGCTGGAATTGCAGCGATATTTGCGATCCAGCCGTCGATTTACCG	-16.7	20.73	ygaE_CDS
942136	-	19.69	CACTTGCCCTTTATTTGGCTTCGTGGATCGGGCTTCCCGCGCCGATTTTCG	-14.6	0.29	ygaE_CDS
942177	-	18.38	GAAACTTGGTGCCCGCATTTTCAAAACCGGGATTGCGATTACACTTGCCCT	-9.3	5.81	ygaE_CDS
942407	-	275.13	AAAAACTAGAATCAAATACCTTGAACAGGAGCTTTGAGCTCCTGTTTTTTT	-16	96.85	gsaB+42
944575	+	14.94	GAAGGAAACCGGAGTTCGCATTACTCCTCAACGTCATGCGATTCTGGAATA	-16.5	0	perR_CDS
944613	+	13.75	CGATTCTGGAATATCTCGTTAACTCTATGGCTCATCCAACAGCGGACGATA	-5	18.32	perR_CDS
944665	+	11.94	ATATAAAGCTCTGGAAGGGAAATTTCCTAACATGAGCGTAGCGACGGTATA	-13.8	12.84	perR_CDS
944918	+	11.5	CACCGTTTAGAAATTTACGGCGTCTGCCAAGAGTGTTCGAAAAAAGAAAAT	-6	7.49	perR_CDS
944920	+	11.56	CCGTTTAGAAATTTACGGCGTCTGCCAAGAGTGTTCGAAAAAAGAAAATCA	-6	2.39	perR_CDS
944922	-	40.31	AAATGTCGAAATAAAATAAGCTGACCGTTTCGTGCGGTCAGCTTATTTTTA	-23.7	58.33	ygzB+37
944962	+	641	AGAAAATCATTAAAAATAAGCTGACCGCACGAAACGGTCAGCTTATTTTAT	-21.6	92.74	perR+38
946471	+	103.63	AACGTCGCTGATGCGCTTCTGAGAAAACAAGCTCACAGCGGCGGGAAAATA	-18.5	5.63	ygxA+67
946555	+	434.06	ATGTTATATTAATAAAGTCGCTTCAACAAGAAGTGAAAATGATCTTTGAAA	-7.8	30.3	ygxA+151
946697	+	92.81	AGGTCACACAGGTGTCGCCGCAGGATGCGGTGAACTTAACCTGTGATCCAT	-23.4	39.18	ygxA+293
948316	+	298.94	ATATAAGACCTTGGGTCTTATAAACAGAACGTTCCCTGTCTTGTTTAGTTT	-13.6	50	ygxA+1912
948419	+	30.88	ATCACATTCAATTAGTAATACAAGATATCACATAGTGATTCTTTTTAACGG	-5	47.06	ygxA+2015
948580	+	12.94	TCCGAATGGGGAAACCCACCACTCGTAATGGAGTGGTATCCATATCTGAAT	-16.6	7.84	ygxA+2176
951564	+	20.31	CTCTTCAGCGCCGATGGTAGTCGGGGGTTTCCCCCTGTGAGAGTAGGACAT	-13.4	0	ygxA+5160
951650	+	1395.75	TAGAGCTATCGGCTGTTAACCGATCGGTCGTAGGTTCGAATCCTACCTGCG	-15.2	0	ygxA+5246
951754	+	25035.5	TGTAGGCGGTCAACTCCGTCTCAAGGGTTCGAATCCCTTGCTCTCCGCCAC	-17.2	43.16	ygxA+5350
951781	+	165.88	TTCGAATCCCTTGCTCTCCGCCACTGATACTTATACATAATTACAATTGAA	-0.8	7.74	ygxA+5377
951787	+	201.13	TCCCTTGCTCTCCGCCACTGATACTTATACATAATTACAATTGAAAGTCTG	0	49.9	ygxA+5383
951945	+	2772.75	TCTGCCTTACAAGCAGAGGGTCGGCGGTTCGAGCCCGTCATCCTCCACCAT	-16.1	2.61	ygxA+5541
952030	+	9160.75	GTCGGGCTCATAACCCGAAGGTCGCAGGTTCAAATCCTGCCCCCGCAACCA	-18.1	14.62	ygxA+5626
952119	+	15184.3	CCTGCCTGTCACGCAGGAGGTCGCGGGTTCGAGTCCCGTCCGGACCGCCAT	-20.9	25.41	ygxA+5715
952210	+	1085.31	GACTGAAAATCCGTGTGTCGGCGGTTCGATTCCGTCCCGAGCCACCACCTA	-12.3	9.43	ygxA+5806
952294	+	708.13	TTGTAATCAGTAGGTTGGGGGTTCAAGTCCTCTTGCCGGCACTGTTTTTTC	-13	5.86	ygxA+5890
952391	+	12826.5	GTAAATCCGCTCCCTCAGGGTTCGGCAGTTCGAATCTGCCCCCCTCCACCA	-13	22.81	ygxA+5987
952471	+	17429.2	AGAGGTCTCCAAAACCTCCGGTGTGGGTTCGATTCCTACTGCCCCTGCCAA	-15.5	18.59	ygxA+6067
952572	+	1126.88	CAGATTGTGGCTCTGGCACTCGTGGGTTCGATTCCCATCAATCGCCCCATA	-12.6	1.24	ygxA+6168
952626	+	32	TCATTGGGCTATAGCCAAGCGGTAAGGCAACGGACTTTGACTCCGTCATGC	-11.9	0	ygxA+6222
952657	+	458.94	GGACTTTGACTCCGTCATGCGTTGGTTCGAATCCAGCTAGCCCAGTCTCAC	-9.7	0	ygxA+6253
952775	+	4942.56	ACCACCTTGCCAAGGTGGGGGTCGCGGGTTCGAATCCCGTCTTCCGCTCCA	-20.3	6.05	ygxA+6371
952851	+	5920.38	AGGCAGAGGTCTGCAAAACCTTTATCCCCGGTTCGAATCCGGGTGTCGCCT	-16	4.43	ygxA+6447
952948	+	5956.31	TCCTGCGGTAGGTGACTACCGTGCCGGTTCAAGTCCGGCCCTCGGCACCAA	-19.8	31.28	ygxA+6544
952984	+	2113.44	GGCCCTCGGCACCAATTTTACTTACATGGTAAGTTGAATTGGTGTTTGTGT	-18.4	65.75	ygxA+6580
953038	+	786.56	ATCATTATAACTAATCATATTAATGATCTACATAAGTAGATCATTTTTTTA	-11.5	85.71	ygxA+6634
953295	+	10094.8	CTCAAAATCGTGTTCCTTCTGGAGTGTCGGTTCGACCCCGACCACCGGTAT	-11.6	68.53	ygxA+6891
953297	-	143.81	TTCTTTAATAAAAAATAAAAACCCGTTTCTGTTAAGAAACGGGTTTTTCAG	-19.2	49.02	spo0M+76
953335	+	1317.25	ACCACCGGTATACTGAAAAACCCGTTTCTTAACAGAAACGGGTTTTTATTT	-19.1	93.88	ygxA+6931
953342	-	766.81	TAGACCAATACGCTGAGTAAGTATAAAAAGGAGCCGAGGCTCCTTTTCTTT	-15.2	71.96	spo0M+31
953373	+	12.38	CGGGTTTTTATTTTTTATTAAAGAAAAGGAGCCTCGGCTCCTTTTTATACT	-15.3	12.82	ygxA+6969
955753	+	177.25	TCTTAACCCTTTGGACCTGATCTGGTTCGTACCAGCGTGGGGAAGTAGAGG	-16.2	26.89	ygaJ+168
955802	+	11	GGAATTGTTTTTGTTATTGTCTTGCTGGGCAATAATATGTTTCTTTCTGAC	-12.6	33.57	ygaJ+217
955838	+	487.75	ATGTTTCTTTCTGACTGTAACCGGGTTCATTTATATGAATCCGGTTTTTTG	-16.8	88.57	ygaJ+253
959493	-	122.13	GATTCTTAATGGAGAAATGCAAAAACCCGTTGTAGTCAGCGGGTTTTTTTA	-18.8	100	katA+42
966178	-	46	AAGAAAAACGAAAAAAACTCCGGCGCGCTGTAATCGGCCGGAGTTTTTTCT	-21.1	50	ygaO+18
966744	-	35.75	AAGACAGACTGTGGCAGCGATTGAAAAAGGCGATTATGTTCCCTCACTGCT	-8	5.31	ygzD_CDS
967139	+	30775.1	CTCAGCCTTCCAAGCTGATGTCGTGAGTTCGATTCTCATCACCCGCTCCAT	-11.4	52.04	rpsN+961
967168	+	18.06	CGATTCTCATCACCCGCTCCATACATACGTTATTAACGCAGTGTTTCGTTT	-2.3	0.15	rpsN+990
967197	+	4427.81	TTATTAACGCAGTGTTTCGTTTCTCAGATAAACGAAGTATTGCGTTTTTTT	-17	70.87	rpsN+1019
967202	-	25.75	CATACAGTACATTGGCTTACGTAAAAGAACACGAATACCGTGTTCTTTTTC	-13.5	84.62	yhzB+27
967445	+	123.88	TTTTTGAAATCGCCAAAAATGCCGTTTTCATCAGAGAAAAGCAGTATGTTT	-8	16.24	rpsN+1267
967922	+	21.88	GTGATATCAACCTATTATAAACGCTGTGTCGTTTTATCACAAAGAAAGGAG	-6.2	41.38	rpsN+1744
969151	+	61.69	GTATAGAGCAGAAGGAAAAAACACTTGAGATCATCCAAGTGTTTTTTCTCT	-16.8	57.41	yhbA+56
970615	+	25.13	CGATTCTTGTTTATGAAGCGCTGCGCCAGCAAAATTACCGTGATTTAAAAT	-6	25.13	cspR_CDS
970656	+	148.06	GATTTAAAATAGTGAAAAACCCGCTCATCGATGATGGGCGGGTTTTTTTGC	-23.3	100	cspR+39
972822	-	398.38	AGCCTGGAAAAGAATAAAAAAGGGTGCTCCTGAAAGAGCACCCTTTTTGTA	-20.9	95.5	cspB+11440
972859	+	17.81	CATTGTTCTGTTATACAAAAAGGGTGCTCTTTCAGGAGCACCCTTTTTTAT	-21.6	50	yhbF+53
975085	+	11.25	GCCTGCTGAACCGATAAGCAACGTGACCCGTCCGAATAGGGCGGGTTATTT	-22.1	100	prkA+34
980358	+	128.31	AAGTAATGAAAAAGGCAAATCCGTTTACTCATGCGGGTTTGCCTTTTTTGC	-24.4	100	yhcD_CDS
984171	-	201.44	TTTTTATTTTGACAAAAAAGCTGTTTTGCATAAGCAAAACAGCTTTTTTTA	-20.6	100	cspB+91
984211	+	71.44	TGCAAACTAATAAAAAAAGCTGTTTTGCTTATGCAAAACAGCTTTTTTGTC	-21.7	8	yhcI+41
984214	-	51229.7	TAAGCATAAATTGATATGAAAAACTGCAGGTGCAAACCTGCAGTTTTTATT	-20.5	99.37	cspB+48
984252	-	1085.38	ACCGCGGACCACAAGCTGCTAACGTTACTAAAGAAGCGTAAGCATAAATTG	-9.6	6.81	cspB+10
984435	-	96.25	TCGCTTTAGGAGGAAATTTCATGTTAGAAGGTAAAGTAAAATGGTTCAACT	-2.4	0	cspB_CDS
984455	-	138	AGTGAATTTAAGCGTTATGATCGCTTTAGGAGGAAATTTCATGTTAGAAGG	-5.5	14.47	cspB_CDS
984476	-	65.63	AAGTTTGTTAAGAGCAAGAATAGTGAATTTAAGCGTTATGATCGCTTTAGG	-5.7	0	dgcK+1258
984498	-	91.31	TTTGTAAGAGTTTTCGTCTTGAAAGTTTGTTAAGAGCAAGAATAGTGAATT	-4.1	0	dgcK+1236
985184	-	29.31	AATAAATGCCCATGGGCGTTATGTATGTCGTCCCGAGCGGTGCCAAATTAA	-9.1	24.67	dgcK+550
985707	-	53.06	TGTTTTTCAGAAAAAAAAGAATGAATTCAATGTTCGAATTCATTCTTCCAA	-12.9	0	dgcK+27
985728	-	12.88	GAAACGGGACGGAACAGAGTGTGTTTTTCAGAAAAAAAAGAATGAATTCAA	-3.4	0	dgcK+6
985747	+	102.06	GTCTTTCAGATTGGAAGAATGAATTCGAACATTGAATTCATTCTTTTTTTT	-17.5	70	yhcJ+16
985911	-	22.06	CTTGATAAAGCAGCCCGGATCGCTGAACGGATCAGGAGCACTGTAAGTGAT	-11.8	0	dgcK_CDS
986523	-	16.63	TCAACGGCAACGGCCCTGGCCATGATCACTGCAGGCCGCTTGCTGATTACG	-19.1	2.12	dgcK_CDS
987204	+	22.81	AATATAGTCATTCAAACAGCCGACTGGTTTAATATTGCCGGGGGCGGATAT	-12	0	tcyP_CDS
987210	+	23.5	GTCATTCAAACAGCCGACTGGTTTAATATTGCCGGGGGCGGATATGTCAAA	-12	0	tcyP_CDS
987630	+	15.31	GTGGCATTCCTCGGCGTAAAACACAAACAGCCGGAACAGGCAGAAACATTT	-8.7	0	tcyP_CDS
988178	+	10.63	CTCCTTCGGGGTTGCCGGAGTCGGCGGCGGAGCGACATTCGCGGCGCTTCT	-19.5	0	tcyP_CDS
988419	+	305.56	GAAGCGTAACATATGAAAACGTGTAATCCAAGAGGATTACACGTTTTTTTA	-20	93.48	tcyP+42
989627	+	35.31	CCTAACGCTGAATAAATGAAAGAAGCCGCACAATTTGTGCGGCTTTTTCTT	-19.2	100	yhcN+36
997082	+	26.63	GATATAATCATGCGGCAAGGGCTTTTCTATTTTTAGAAAAGCTCTTTTTGT	-18.4	69.57	yhcU+44
997634	+	23.94	AAAACATTCATTAATAAGAAAGAGCTTGCAGTGTGCAGGCTCTTTCTTCAC	-21.6	53.85	yhcV+37
999981	+	16.44	ATATAAAAAATAATTCCCAAAAAACCCGCCTGAATTGGCGGGTTTTTTTAA	-19.2	100	yhcX+38
1002447	+	154.56	CTTTACGGCAAATGTTTATGCACCCGTAAAGCGGTTTGTTGTGGTTTTTTT	-12	3.26	glpP+125
1004936	+	118.19	AGGAGAGACCACAGCACCAAAGTGTAAGCATGCACTTTGGCTGTTGTGGTC	-29.9	27.27	glpK+102
1006676	+	49.69	TACCGCTTGAGCAATAAATCATAACGGGCTGTCTGCAGCCCGTTATTTCTT	-18.2	60	glpD+34
1008562	+	699.56	CAAAATAATTCAAGTATGAGCTGGGTCATTGTAAATGATCCGGCTTTTTCT	-17.5	99.11	pgcA+43
1010985	+	14.69	GCATGTTCGCAAAAGCAGGAAATCCCGGCGTCTAAACGCCGGGATTTGTTT	-23.4	25	yhdA+16
1011750	-	363.44	TATTTCTAAAAACAGAAACTGTGCGGCCTTAACGGCTGTACAGTTTTTTAT	-21.8	80.7	lytF+42
1013389	-	125.81	TCATGAAGCTTTTAAAAATGAAGGAATAGATTAAGATTCCTTCTTTTTTTA	-10.9	72	nsrR+22
1017052	-	13.88	TTTTAAAAACTGGAAAATAAAAAGGATGCAGAACGCTGCATCCTCTTTTTT	-14.5	100	phoA+31
1020007	-	15.31	CTGTGCTCCGTCTAATGAAAAAAACCCGTTCCAATGAACGGGTTTTCTCTA	-14.8	11.43	citR+66
1020042	+	80.19	AAAGATTCTAATTTTTAGAGAAAACCCGTTCATTGGAACGGGTTTTTTTCA	-19.7	97.3	lytE+40
1021495	+	15.69	AAAGATGGACGCGCGGTGAACAAGCAATTGCACCTTCTTCCCAGTACGGAC	-8.2	10.53	citA_CDS
1023136	+	53.81	TTTATTTCAACGTAATCAACGAAAAACCAGCTCAAGAGCTGGTTTTTTGTG	-18.9	100	yhdF+36
1025003	+	12.38	GGAAGTTCCCTTACGTAGCGGGGACCAATGGGGGAGGAGCCTTTTTTCTTA	-11.3	0	yhdH_CDS
1026216	-	28.75	TCATCTTATTAAATAAAAAACAGGCCCCGGAAACGGAGCCTGTTTTTTAAA	-21.5	38.46	yhdI+39
1026252	+	36.19	CGGAATTTTATCATTTTAAAAAACAGGCTCCGTTTCCGGGGCCTGTTTTTT	-22.5	100	yhdH+32
1026864	-	11.63	GGGACCATTATGACGATTACCCGCAGACAGGAGCTGCTGGCATGGGCGGCA	-13.3	9.09	yhdI_CDS
1028203	-	67.44	AATTTACAGTTTGGCTTTTAAAAAAGACGCCTTTTCAGGCGTCTTTTTTCG	-16.9	92.59	yhdK+30
1029734	-	13.06	GGTAGAGATAAAGGAAGTGCTGACTGGTTATATGTCCGAGCTCCCCGATAA	-6.5	0	sigM_CDS
1032028	-	171.88	CCAGCAGGAAGCATAATAAGAAAAGCACCTTGTATAGGGTGCTTTTCTTAT	-21.7	98.68	yhdP+35
1032063	+	196.44	CCTGAAACTGTGAAAATAAGAAAAGCACCCTATACAAGGTGCTTTTCTTAT	-18.9	74.81	plsC+69
1032526	-	10.44	CAGCGGTGAGGTATCTGTTGATTCCACCATTTCTCAATTCGTCAACCCTAT	-7.8	10.35	yhdP_CDS
1033098	-	13.44	CTGCTTCACCCGCTTTTCGTCCAAATGAACGTTCCAGGTTCCCTTTCACAT	-2.7	2.93	yhdP_CDS
1033231	-	33.25	GGAAGGAAATAAAGCAGCAATAGCCGTAAAAAAAGTGACCACGCATCTTGA	-2.9	4.61	yhdP_CDS
1033328	-	14.81	TTTTAGTTGCTGTTTTAATCGCCCTGACGGCATTTTTCGTGGCATCTGAGT	-10.3	0	yhdP_CDS
1033478	-	11.06	ACAAGCTGAAAAGCAAACTCCCGCCTGAAAAGCTCGCCGTGTTCCAATCAT	-5.1	0	cueR_CDS
1033630	-	25.06	GTCCGATATTAAAGATCGACTGGAGAACCAGTTTCCCTCTTCAGCTAAACT	-9.5	0.62	cueR_CDS
1035273	+	37.25	CTTAAGAAGGCAAAGAAAAGAAAACAGTTTTCAAGGCTGTTTTCTTTTTAT	-15.8	52	yhdR+46
1035539	+	37.56	ATGTTAAGGAAAAATGATTATATCAGGAGGTGACTCCTTATCCTTTGTTGA	-8.1	0	yhdR+312
1036863	-	13.63	TCAGCATCACAGGCTCGGGCAGCGGCAGCTTGTGGTGCGCCGTAATCCCGG	-23.5	10.71	crcBA+90
1036913	-	19.94	TCACAATATAAAAAAACCTTGAGCTTATTTCTCGCTCAAGGTTGCACTGTT	-15	7.21	crcBA+40
1036955	+	120.13	TGATGCTGAACAGTGCAACCTTGAGCGAGAAATAAGCTCAAGGTTTTTTTA	-17.9	98.33	yhdT+16
1038827	+	144	TGGCTGATAGATGAATTGAGAAATGACCCCGGCGTTTCGCCGGGGTTTTGT	-19.5	98.59	yhdX+67
1040062	+	109.88	GGAACGGGCTTAAAAGAGAGACTTCGTCTGACAGAGGCGGAGTCTTTTTCA	-19.9	85.11	yhdY+38
1040510	-	25.94	CAAATGTCCCCATTGTTTCCGGCCGCCGTGCACTCCGGCACCTCCCGCTCC	-7.2	22.14	yheN+351
1040826	-	307.06	TCCTGTTCATGAATAAAAAAGTGAGGCGCATAAAGCGGCTCACTTTTTCAT	-18.6	26.62	yheN+35
1040865	+	13	GAAGTTTGGGCATGAAAAAGTGAGCCGCTTTATGCGCCTCACTTTTTTATT	-19.7	0	yhdZ+28
1040985	-	10.5	CGTATTACAGCAGCTTGAGAATATGGAACACAGCTCTTCAAGCCGCCCAAA	-11.9	2.73	yheN_CDS
1041265	-	12.88	CAGAAAAGGAAGGCCACGCACTCGGTTTACATGGCGTTACCCACAATAACA	-7.2	0	yheN_CDS
1041381	-	26.5	CGGCCCTTCAGCCGTTACAACCCGCTTGCTCGACGTACTGAAAAGCGCTGA	-11.1	0	yheN_CDS
1041616	-	12	TTGCTTTTAAATTTGCAAGTTTAGCAGTTTTATGTGTGCTGCTTTTGCTTA	-10.7	2.05	yheN_CDS
1041627	-	10.56	TGCAGTTTCGCTTGCTTTTAAATTTGCAAGTTTAGCAGTTTTATGTGTGCT	-9.5	0	yheN_CDS
1041635	-	10.88	TCTCCTTCTGCAGTTTCGCTTGCTTTTAAATTTGCAAGTTTAGCAGTTTTA	-10	0	yheN_CDS
1042849	-	53.5	TTTGTTAAAAAATAAAAAGAGCCCCGCTGTAAAAAGCGGGCTCTTTTCTTC	-21.4	84.62	nhaC+36
1042888	+	93.81	CATAAATGAACGAAGAAAAGAGCCCGCTTTTTACAGCGGGGCTCTTTTTAT	-20.7	88.41	dat+46
1045185	+	181.69	TAACATATCGGTTAAAAAAGGCATGGAGCTGACGCTTCATGCCTTTTTTAT	-24.3	92.41	yheJ_CDS
1049094	-	17.56	TGACTACATAAACCAAAAACCCAAAACACGATTGTTTTGGGTTTTTGAGCG	-19.7	78.26	yheG+48
1049134	+	72.06	CATTGCATAACGCTCAAAAACCCAAAACAATCGTGTTTTGGGTTTTTGGTT	-21.3	66.67	yheH+41
1050416	-	82.94	ATGCTTTTTCATATTTATGACTAGCTTAGCCTAAACGGCTAAGCTTTTTTT	-14.8	100	yheE+27
1055101	-	35.25	GTTTGCTGAGTGAATAAAAAATCCCTTCTTATCCAAGAAGGGATTTTGCTT	-17.1	77.78	yhaZ+42
1055137	+	578.31	TGTTGAAGGCTAATAAGCAAAATCCCTTCTTGGATAAGAAGGGATTTTTTA	-18.5	87.66	yheA+38
1056512	+	142	ACAGAGAGTAAGTGTTCGGAGCGCATCATTGGTCAAACAAGGGGTTCCTGA	-7.5	3.09	yheA+1413
1056580	+	2189.69	ATCGAAATAACGATATTAGGGAGAATGGCTGCTTCGATCGTATCCTATCAA	-6.9	73.26	yheA+1481
1056619	+	713.44	GTATCCTATCAACAAGCCATACATAAAGTCTGCTGAGCCAGGCTTTTTTTG	-7.6	75.1	yheA+1520
1057610	+	10.63	CGTGTGTAAAAAAGCCGCTCGCGCCCTGACAGGTGCGGCGGCTTTTTTGCC	-31.5	62.5	yhaX+42
1059168	-	43.5	AAAAAAACAGGGATAAAAAAAGCAGCACTGTAATCAGTGCTGCTTTGTCGT	-20.4	91.67	yhaU+35
1059204	+	141.88	AGATTTTTGAAAAAACGACAAAGCAGCACTGATTACAGTGCTGCTTTTTTT	-19.2	96.83	hemZ+19
1060925	-	11.94	TTATTTGTAACTCACCCCATACTGCCAACACTACATTCGGAGGGATTTTCA	-3	6.45	khtS+63
1061124	-	24.94	AACACAATCGGCAAAAACGCCATCGCCGGGCAGCATGCACCCGGCTGAGCT	-17.4	11.72	khtS_CDS
1064776	+	151.25	TAGCGAAAAACTGATTGGAAAACAGCCTGGGGATTCTCAGGCTGTTTCTTT	-20.1	75.63	natB+37
1070032	+	242.44	AATAACTTAAAAAGGACTGATGCTGACATATTCAGCTCAGTCCTTTTTGAT	-25.6	67.83	yhaM+46
1070328	-	156.94	AGCAATTCTAAATAATAAAAAAAGCTGTGCGGCTCATTGAGCCGCACAGCT	-25.4	100	prsA+36
1070368	-	32.69	TAATACATCTTCAACAAGCAACAGCACTTCTTCATCTTCAAGCAATTCTAA	-1	38.28	prsA_CDS
1070385	-	17.06	GATCTGAAAGACACATTTAATACATCTTCAACAAGCAACAGCACTTCTTCA	-1.5	14.11	prsA_CDS
1070393	-	20.06	AAGATAAAGATCTGAAAGACACATTTAATACATCTTCAACAAGCAACAGCA	-2.1	36.01	prsA_CDS
1070537	-	10.44	TCATTAAAAAGACAGAAGAACGCGGCAAATATGATGATATGAAAAAAGAAC	-0.8	0	prsA_CDS
1070579	-	13.56	GTGAAGTCAGTGATCCTGTCAAAACGCAATACGGCTACCATATCATTAAAA	-2.7	0	prsA_CDS
1070737	-	11.06	AGTAGAGAAAAAGCTGAAAAAAGGCGAGAAGTTTGAAGACCTTGCGAAAGA	-5.2	0	prsA_CDS
1070745	-	10.38	GCTGAAGAAGTAGAGAAAAAGCTGAAAAAAGGCGAGAAGTTTGAAGACCTT	-3.1	0	prsA_CDS
1070758	-	11.31	TGATAAAAAGACAGCTGAAGAAGTAGAGAAAAAGCTGAAAAAAGGCGAGAA	-5.3	1.28	prsA_CDS
1070766	-	11.13	CTTGTTGCTGATAAAAAGACAGCTGAAGAAGTAGAGAAAAAGCTGAAAAAA	-5.3	0	prsA_CDS
1070938	-	17.06	TGGCGATCAATATACTGCCCTCGAAAAGCAATATGGCAAAGATTACCTGAA	-6.1	0.46	prsA_CDS
1070946	-	16.19	ACGCAGCTTGGCGATCAATATACTGCCCTCGAAAAGCAATATGGCAAAGAT	-7.4	12.05	prsA_CDS
1070956	-	15.06	AGAATACAAAACGCAGCTTGGCGATCAATATACTGCCCTCGAAAAGCAATA	-7.4	9.98	prsA_CDS
1071110	-	14.25	TCGCAAAAACAGACGCAGGCGATGTCACAAAAGGCGAGCTTTACACAAACA	-7.4	1.01	prsA_CDS
1071709	-	260.19	CAGTGTAAATACGAAAGAAAGCATAGCTGCTGATTAAGCAGCTATGCTTTT	-23.9	79.17	yhaJ+333
1071756	-	20.69	ATCTATATTAATTTTACTGATCTCTTCGTTTGTGGAGATCTCCTTTACAGT	-9.1	62.78	yhaJ+286
1072344	-	24.38	GTTTGCTCGTCGTTATTTTATTTGTACATAAAGTCATCCATGTCCTGCCAA	-1	12.41	yhaJ_CDS
1072941	-	68.38	AAAAGCGCAAGGAGCTTATCAAAGGTTACAAATCCTTGCGCTTTTTGTGTT	-19	6.17	hpr+165
1073285	+	69.44	CATAAAATCATCGCCGTAGATATGGCGTATCATACACATCATTTCTGCCAC	-8.3	33.01	yhaI+176
1073843	-	335	ATCCTATTCAAAAGAAAAAAATGCGGGCCAAAATTGGACCCGTATTTTTTT	-18.8	98	yhaH+52
1073883	-	27.88	GAGAAAATCAGACAGCTGGAGAAAACCTTACAAAACTAATATCCTATTCAA	-1.7	29.87	yhaH+12
1074603	-	587.56	CTAAATAATTGTCACACAAAACCTCTTCCGCTTCCGGGAGAGGTTTTTTTG	-18.5	45.7	trpP+43
1074761	-	14	TCTATCGTCAGCTTTATTGATCGTCGGTTTACCGGGCGGTTTCGCCGCATT	-12.7	3.92	trpP_CDS
1074816	-	13.5	CAGGTGCAGCCGCTGTGCTGACAGTGATCGGGACCATCTTATCAGGAATTG	-11.2	4.7	trpP_CDS
1074928	-	41.56	TCCGCGCTTACAACCGCGTTTCCAGCCGGACAGATCCCTAACATCATTGAT	-7.7	0	trpP_CDS
1076502	-	480.63	TCTCTTCCTCTATCGCAAAACGCCTGGCCTCATCATAAGATGAGGTTATTT	-15.3	81.09	hinT+13
1078726	+	10.63	ACGGATGGACGTCATCATTCGCTTTGCGGCGAATACACTCGTTCTTTATTT	-12.8	0	ecsB_CDS
1080112	-	20.38	TCATCAGCTATAAAAAAACAGCCGGAGTGTTTATTCTCCGGCTGTTTCCTT	-21.4	100	yhaA+38
1080151	+	33.75	TGAGGATATTAAAGGAAACAGCCGGAGAATAAACACTCCGGCTGTTTTTTT	-23.8	100	ecsC+19
1083203	-	308.06	CACCACATATTTCGCTGTCGAATAGCTGCCGGCATGTCCGGCAGCTTATTT	-19.5	46.51	yhgC+26
1088265	+	76.44	CATGTAGTCATCATCGGCGGCGGCATTACCGGTTTAGCCGCCGCCTTCTAT	-21.6	0	hemY_CDS
1089639	+	128.75	CTTACCTATTTATTCAGCTAAAACCTCCGCTTTATCGCGGAGGTTTTTTTG	-17.8	91.49	hemY+30
1090689	+	17.75	ATAACAACTTTGATTGGCATTTTTCCAATGATCTCGACCAATCGTTAAAGG	-6.4	22.96	yhgE_CDS
1092729	-	41.13	GGGGATGTAACAAAAAAAGAACTTGTTTCCAAGGAAACAAGTTCTTTTTCT	-19.6	77.27	fabHB+41
1092768	+	157.13	CGGCTTCATAAAGAAAAAGAACTTGTTTCCTTGGAAACAAGTTCTTTTTTT	-19.8	100	yhgE+40
1096520	-	383.56	TTTCTGGTTAATGAAAAGCCTGCGGGGTTCTTGCCCCGCAGGCTTTTTTAA	-30.5	99.32	gltT+40
1096560	+	55.06	TTGTTAAAGATTAAAAAAGCCTGCGGGGCAAGAACCCCGCAGGCTTTTCAT	-27.3	40.15	yhfF+37
1096560	-	38.38	ACTGTTATGTCCCAATCGAAAACAGAACAAAACGCAACCATTTCTGGTTAA	-6.3	90.48	gltT_CDS
1096789	-	18.5	CGTCTTAATGGTGACATCCAAAGGGATGGCTGCCGTACCTGGTACTTCTTT	-11.7	0	gltT_CDS
1096853	-	26	CACTCTTTTTAGCACAGGTATATGGCATTGATTTGACGATTTGGCACCAAA	-3.8	15.13	gltT_CDS
1096876	-	21.06	CGTTCTCTATCAATCTATTGCCGCACTCTTTTTAGCACAGGTATATGGCAT	-5.4	5.94	gltT_CDS
1096882	-	22.63	CGGTTCCGTTCTCTATCAATCTATTGCCGCACTCTTTTTAGCACAGGTATA	-2.5	21.94	gltT_CDS
1097161	-	17.56	ATTCGGACTCGGTTCTCTTATCTCTCTCGGAAAGCTCGTCGGATTGGTTTA	-7.1	0.03	gltT_CDS
1097268	-	26	TTAGCCTTTTTTGAAGGTGTATCCCATGCCATGTTCCACGTTGTAAACCTT	-6.1	0	gltT_CDS
1097386	-	13.94	TATTGTGCCGACAAACTTCTTCCAGTCATTGGTCGAAGGGGATCTTCTAGC	-9.7	20.25	gltT_CDS
1097434	-	16.63	AACTGAAAAAGAACAAAGTAATAAATCAGTGGCGGAAACGTTCCTCCATAT	-8	0	gltT_CDS
1097525	-	18.69	TTCTCGGACTAGCCCTTGCAAACATCTTCCATCCGGGTACAGGAGTTAATA	-5.7	0.41	gltT_CDS
1097626	-	21.81	CTTAATCATCGGTGTAGCCGGTGCAGGAAATGGAAAGCAAGTCGGTAAATT	-8.4	0	gltT_CDS
1100904	+	400.31	GAAACTATGACAGTACTGACACTCAGGGCTTTTTGCTCTTGAGTGTTTTTT	-16.5	96.79	yhfK+41
1102556	+	18	TATTTTGCCCCAATAAAATGAAAAAGCGAAGCGGTTAGCTTCGCTTTTTCA	-21.4	87.5	yhfL+35
1107514	+	15.19	TAAAAGATATTTTGCAAAATCGCATTCAAGGAAGAGTGATTGTGAAGCTTT	-6.8	48.35	yhfP_CDS
1107560	+	80.06	GCTTTAACAGGATCAGCTTGCAGAGAATGTTATTTTTCTGCAAGCTTTTTT	-19.3	27.37	yhfP+44
1107997	+	12.5	GGGTTGCCGATGACAACAAAGCGAAGCAGCTGATCAACAAGGATGTGCTGA	-9.5	0	yhfQ_CDS
1108160	+	13	GTACGATCAGCTGAAAAAAATAGCGCCGACGATTGCACTTAATAATTTAAA	-3.6	0	yhfQ_CDS
1108326	+	11.19	CAGAAAATCAGCGCGAACAGCCAGTCCGTGCTTTTGATCGGAAATACAAAT	-8.8	0	yhfQ_CDS
1108395	+	15.06	GATGAAAACTTCTTTACATCGAGACTTTTAACACAGGTCGGCTACCGATAT	-7.2	0	yhfQ_CDS
1108701	+	19.13	GCGAATGCCATTTTGGACGAGCTTCAAAAAGAGATGCCGGCTGCTAAGAAA	-5.7	10.07	yhfQ_CDS
1108703	-	112.69	TCCGGCTTTATCAAATAAGAAAAAGACAGGCGTTTGCCTGTCTTTTCTTTT	-18.7	90.91	phoE+33
1108738	+	669.75	CGGCTGCTAAGAAATAAAAGAAAAGACAGGCAAACGCCTGTCTTTTTCTTA	-19.2	96.64	yhfQ+34
1112581	-	207.19	ACAGAAGAATAACCATCAAAAACCGGTCTGCCATACGGCCGGTTTTTTTGC	-14.8	99.29	hemAT+39
1116554	-	42.75	AGCGCTCAAGCAGAGCGAATAAGCCAATCCTTCAAGGATTGGCTTTTTATT	-23.3	83.87	yhzC+29
1117731	+	27.69	GTATTAGAAAAATAGGAAGGAGCTGACCGAACAGGGCAGCTCCTTTCATAA	-22.8	30	comK+44
1118936	+	10.5	CTCGTTTTCGGTTTTTCATACGGAGCTGGCCATGTGGCGGAAGCCAAAACA	-13.7	0	yhjA_CDS
1119158	+	274.81	TGTGAACGGTAAATAAGAAAAAGCAATCTGGTGTCCAGATTGCTTTTTTTA	-20.1	92.16	yhjA+39
1122714	+	22	ATTTCTGATGCCGAATAAAAAGACGCTAATTGAAGAGGCGTCTTTTTGTAT	-15.2	88	sipV+33
1124996	+	67.13	TTCCTAGCATTTTTAAATAAAAAACACGCACTGCGGTGCGTGTTTTTCGCT	-17.6	83.33	yhjH+31
1130739	-	34.88	GACGACTTACGATTGAAAAAGAGGTTAAAATGAATAACCTCTTTTTCTTAT	-15.8	75	yhjN+179
1130784	+	11	TTTATATAAGAAAAAGAGGTTATTCATTTTAACCTCTTTTTCAATCGTAAG	-17.2	0	yhjM+80
1143554	+	65.81	AGCGAGATCCATAAGCTCCGGAATTTCAGGCGGAGCGGGTCTCGTTTTCTA	-23.9	13.3	addA+49
1148499	+	84.44	AAAAAATGACTAAAAAGCAGCCCTCTCTTTGCAGAGCGGCTGCTTTTATCC	-20.4	95	yisB+42
1153371	+	19.13	CTACTCGCTGTATTCGTCAGGAAGTGCAAAGGGCGCAAAAATCACTCATAT	-7.9	0	yisL_CDS
1153463	+	14.44	CTGAGCTGTTTGTCCGTTTCGCCAACTGGAACGGAGAATACGCCGGCAAAA	-16.4	0	yisL_CDS
1153633	+	12.88	CTCGGTCTGCATTTGCCAATTGGTTTTCAATTGTTTTAATAGAAAAACCTA	-6.8	15.83	yisL+12
1153666	+	624.38	TTTTAATAGAAAAACCTATGAACCCGGCTCTTTGATAGAGCTGGTTTTTTT	-15.7	94.85	yisL+45
1153963	+	23.19	AAAACGGCAAAGAGCAGACAGGCGCCATGAAGGAGCCGGAACAGGTGAAAT	-8.5	0.04	wprA_CDS
1154011	+	88.94	AATGGTACAAAGTGACCCCGGGAGCAACGGATATTCAGAAAAACTCACATA	-6	5.68	wprA_CDS
1154031	+	40.31	GGAGCAACGGATATTCAGAAAAACTCACATATGGCACTGACCGTAAAGAGT	-6.3	0	wprA_CDS
1154084	+	42.88	TTCAGTACTGAATGTATCTGTATATCCAAGTAAGGAAAAAGCGCTTAAAGA	-5.5	16.91	wprA_CDS
1154135	+	13.06	TGAGACGTTTGAGATGTACCGTTCTTTCACAGCGGAGGATGGAAAAAGCGA	-10.7	0	wprA_CDS
1154173	+	15.69	ATGGAAAAAGCGAAGTCATTTTTCCATACGCGTGGAGCGGCCCTTACTATG	-13	0	wprA_CDS
1154245	+	15.06	AAGAAGAACCAGAGGACGGCGGAACGGCAGAAGCAGCTGCAGAAGCCAAGT	-10	0	wprA_CDS
1154247	+	15.06	GAAGAACCAGAGGACGGCGGAACGGCAGAAGCAGCTGCAGAAGCCAAGTAT	-10	0	wprA_CDS
1154317	+	16.94	CCAAAAAACAGCCGTCAGATTTAGAAGAGGAAGAAGCTTGTCCGGTTGAAA	-7.3	0	wprA_CDS
1154345	+	45.19	GGAAGAAGCTTGTCCGGTTGAAATGAGTGTCGATCAGAAGAAATCAGGAAA	-5.9	0	wprA_CDS
1154409	+	21.94	AAGTTGAGATCGATTCGTGATGAGCAGCTGAGCCAAACAGCAGAAGGCAAA	-8.1	9.12	wprA_CDS
1154483	+	22.06	AGCAGCACCGTTTATCGTTGCAAAGCTCGCACTCAATAAAACAGCAAGAAA	-7.1	2.83	wprA_CDS
1154798	+	25.88	AACAAAGGTTATTTTCAAGGTGAAGGACAATAAAAGCCTCTCATCCGTACA	-5.7	0	wprA_CDS
1154845	+	24.88	TACATAATGAAATGAAGGGCTTTTCTGCAAGCGCGCAATCGAAAAAAGACA	-3.5	6.66	wprA_CDS
1154978	+	28.25	ATATACGGCAAGCGCCAAAAGGGTCAAAAGCGCTGCTGCGACACTATCCAA	-12.1	0	wprA_CDS
1155065	+	20.94	ATACAAAAGCTTGGCAAACGATATTCAGTACCCTTATCAATGGCCGCTTAA	-8.7	1.07	wprA_CDS
1155213	+	24.13	GCAGTAGTAGACACAGGCGTAGACAGCACGCTTGCCGATTTAAAAGGAAAA	-9.7	0	wprA_CDS
1155257	+	20.81	AGGAAAAGTAAGAACAGATCTCGGACACAATTTTGTCGGACGAAATAACAA	-6.3	0	wprA_CDS
1155300	+	27.75	AATAACAATGCAATGGATGATCAGGGGCATGGGACGCATGTCGCAGGCATT	-9.4	0	wprA_CDS
1155331	+	16.19	GGACGCATGTCGCAGGCATTATTGCAGCCCAAAGCGATAACGGCTATTCAA	-11.7	0	wprA_CDS
1155497	+	32.38	AAAGGTGATTAATTTAAGTTTAGGCGGAGGCTACAGCCGCGTGCTTGAATT	-13.8	0	wprA_CDS
1155593	+	23.44	CAGCGGGAATGATGGAGAAAATGCCTTATCTTATCCTGCATCTTCTAAATA	-11.3	0	wprA_CDS
1155624	+	13.13	TATCCTGCATCTTCTAAATATGTGATGTCAGTCGGCGCAACGAATCGCATG	-8.5	5.14	wprA_CDS
1155650	+	28.06	GTCAGTCGGCGCAACGAATCGCATGGATATGACCGCTGATTTCTCTAACTA	-10.9	4.69	wprA_CDS
1155799	+	44.81	CATATGCTGCCGCCGCTGCGGGACTGCTGTTTGCTCAAAATCCTAAGCTAA	-8.5	0	wprA_CDS
1155959	+	12.63	AATTCCGAAGACACCTGGTGTAGACTGGCATTCAGGCTACGGGCGGCTGAA	-11.9	0	wprA_CDS
1155997	+	14	ACGGGCGGCTGAATGTCATGAAGGCTGTCAGCGCAGCTGATTTACAGCTTA	-18.3	0	wprA_CDS
1156241	+	47.56	AACATCGTATAAAGTTGTTGTCGTCAAAGGAAAACCTTCCGGCACACCGAA	-8.4	0	wprA_CDS
1156301	+	10.81	GGTGAAAACGAAGGATACGGCAGTAAAAGGGAAGGCAAACAGCAAAGCGAT	-1.4	0	wprA_CDS
1156465	+	13.81	CGGCTGTGGATACAGATAAAAAAGAAAGCAAGGAAGCAAAAGTTGTTGTTG	-5.9	26.34	wprA_CDS
1156506	+	1537.69	GTTGTTGTTGAAAAGTAACCAAAAAGCGGTGCTCGATGCACCGCTTTTTTA	-20.7	99.76	wprA+33
1160782	+	30.31	CTGTCTGATATCTAAAAAACACCCGGCCTTGATTGAGCCGGGTGTTACGCC	-19.2	12.09	yisP+36
1164185	+	65.69	CATTCTACATCACCGCTCAACACATGAGCCCGCTAATGAGCGGGTTTTTTC	-14	97.92	degA+24
1165467	+	36	TTGAGGCTTTCCGCAAAAAAAGCAAGGGCATTTTAGCCCTTGCTTTCTCTT	-20.3	85.71	yisS+69
1167993	-	26.63	TTCAGCAATTCATAAAAGAAACGGCTGACAGGCAGGTTTTTGTGAAATGTC	-12.2	41.18	yisX+206
1174845	-	19.56	TCAATCGCTACAAGTGGGATGGCTCAGCCTATTAAGCTGGGCCATTTCTTT	-20.8	77.78	yitF+16
1180638	-	341.19	AGAAGAGACAAAATCACTGACAAAGTCTTCTTCTTAAGAGGACTTTTTTTA	-10.8	91.12	yitK+271
1180678	-	244.44	AAGGTGCTAAATCCAGCAAGCTCGAACAGCTTGGAAGATAAGAAGAGACAA	-8	45.05	yitK+231
1182443	+	27.69	TAGCATGAAAACGGCTCGCCTGCAGCAGACTGCGGAGCGAGCCGTTTTTTT	-31.7	92.86	yitL+48
1187657	-	33.88	GAAAATGAGCAAACAAAAACAGTCAGACTCTGTGTCCTGACTGTTTTTGTT	-22.3	100	yitS+43
1190001	-	157.38	GGACAAACTGCAATAAAAAAAGGCTATGGCGACTCGCCATAGCCTCTTATT	-19.3	91.78	yizC+35
1190037	+	121.44	GCAGTTTGAAGTCAAATAAGAGGCTATGGCGAGTCGCCATAGCCTTTTTTT	-24.4	95.24	ipi+32
1192605	+	135.25	TTCAATAAAACAAAAAAGGACAGCCTGACATGTGAGGCTGTCCTTTTTTAC	-23.8	72.04	yitW+43
1192914	+	29.94	AAGAAATTGCTTGCATTCGCGCTTTGTACTGGCGCGTATGCGGCCCTGTTT	-18.3	0	yitY_CDS
1193261	+	10.5	GAATGATATCCAGAAATACGTGAATCCATACGGACTCGCGGTAAAAGTCAT	-10	22.54	yitY_CDS
1194186	+	41.81	CACGGCGGCAGCTATTATCTGCCTTATATGACCTACCAGACAAAAGCGCAA	-6.8	0	yitY_CDS
1194501	+	12.69	TTTACCCGCTCCTCGGACGGCTGTCTGAAAGGTTTGACAGCCGTTATTTTC	-18.1	0	yitZ_CDS
1204125	+	16.38	TCAATCCGGCTCTTCTGTCACGCTGACAGATGATCCGATTGAAGCTGTAAA	-20.2	20.45	argF_CDS
1204689	-	1850.88	CAGCATTAAAAAGCCAAAAACCCAAAACATTTATTGTTTTGGGTTTTTTAG	-19.1	93.92	yjzD+42
1204709	-	14.81	CTATGAACAAAAATGCAAGCCAGCATTAAAAAGCCAAAAACCCAAAACATT	-4.1	10.33	yjzD+22
1207417	+	25.25	ACCAGCACGGTGCAAAATGTGGACAAGGCCTATGAAATCATTGCTGAACAA	-7.8	0	med_CDS
1207785	+	12.13	ATGGCGGAAGCTTATGAGCTTGGCAAGTCTGACGCTAAATCTGAAACAGAA	-10.2	26.84	comZ_CDS
1207788	-	11.38	ATTAAAAAGAAAATCATGTGAAAAGCCACTTTCAAAAAAGTGGCTTCTTCT	-14.1	100	yjzB+30
1207822	+	644.31	AATCTGAAACAGAATAAGAAGAAGCCACTTTTTTGAAAGTGGCTTTTCACA	-16.6	63.17	comZ+34
1208691	+	16.19	GAAGCTCTCAAGCATTACCGACTGGGAAGACCGCAATACAGCCGTTCTGTT	-7.3	0	fabHA_CDS
1208993	+	11.06	TCCGTATCATGGAAGCTGCTCGCGAGCGTTTAGAGCTTCCTGTCGAAAAGA	-11.9	0	fabHA_CDS
1209352	+	15.5	TGTTGACGCTGAAGAATATCCGGCAAAAGTTGCCGCTGAATTAAAAGATTT	-7.7	0	fabF_CDS
1209847	+	31.31	CAACAAAGCGCTGTCTACTAATCCAGATCCGAAAACAGCGAGCCGCCCGTT	-6.5	3.9	fabF_CDS
1210400	+	25.63	AATTATGTTCTCAGCAACTCATTAGGATTCGGCGGACACAACGCAACATTA	-4	15.76	fabF_CDS
1210466	+	695.75	CAATCATAATCAAGCCAAACCGGCTGCCCTTAAAGGGTAGCCGGTTTTTTT	-24.9	100	fabF+42
1218076	-	248.31	GAAAAAGACGCTAATCAAAAAACCGCTCTTTGCAAAGAGCGGTTTTTTTCA	-18	100	trpS+37
1219137	-	1089.69	TACCACGGTTCATTCGTCCCTTTTTTACAGGGGAAGAATGAGCCTTTTTTA	-21.9	53.8	yjbE+8998
1219979	+	10.13	ATCAAACGGTGAAGGGAAAAAGGACAGTAAAGGAAAGACGACACTTAACAT	-0.9	0	oppA_CDS
1220981	+	22.63	CAAAGACAATGATGTCAAAACAGCAAAAGAATACCTTGAAAAAGGCCTAAA	-6.4	0	oppA_CDS
1221550	+	143	AATAAAAGACCTCAAGGTATATGGGGAGAAAAGCCCCATATACCTTTCTTA	-21.9	31.96	oppA+64
1225491	+	109.56	TTTTTCATGATTCATCAATCCTTCAAGAGATTTCTCTTGAAGGATTTTTTT	-18.7	96.61	oppF+41
1227963	+	24	TCTATGCCGCTGCAAGATTTGTACCGCTTGATCAACGAGCATCCAGGTTTG	-9.7	0	spxA_CDS
1228067	+	10.56	AGACGAAATCAGACGTTTCCTGCCAAGAAAAGTTCGCTCTTTCCAATTAAG	-3.3	3.18	spxA_CDS
1228139	+	873.69	CTAATAGATCGTATCATCAAAAGAAGGCTGAGTCATCAGCCTTCTTTTATT	-19.6	88.89	spxA+47
1229712	+	13.88	TACGGCAAGCTGATTATTTCAGAGCATGCTCTAGAAACGATAAAAAAACAC	-6.9	29.07	mecA_CDS
1229758	+	468.13	AACACTTTGCATCATAGCAAACCGATTTCCTTCCGGAAATCGGTTTTTTTT	-18.8	95.48	mecA+34
1233134	+	200.75	AAGCAGTCTTAAAAAAGTAAGCCTGTGCGGAAATGACGCACAGGCTTTTTT	-20.8	80.65	pepF+39
1233545	+	10349.8	GTTGTCGTTAAGACATATGAAACCGCGCTTATCCCGGCGCGGTTTCTTTAG	-22.9	99.17	pepF+450
1233580	-	254.19	AATCATGTGAAAAATAGCCGCAGGCGTGCATATGCTTGAGGCTGTTTTTTT	-21.9	76.74	yjbH+34
1235133	-	388.38	ACTTCAGTTTATTACGCGTAACCAGAGGTGCTCTTTCCCTCTGGTTTTTTT	-13	92.17	yjbJ+30
1239389	+	117.88	GACATGAGCAAACTGATAAAAGGAGAGAATCATTGATTCTCTCCTTTTTTA	-19.2	100	yjbO+15
1242365	+	797.13	GACCCTCATAACTTGAACAGGTTCAGACCTGCGTAGGGAAGTGGAGCGGTA	-14.4	59.7	yjbQ+165
1242427	+	504.13	TTACTATGCCAATTCCAAACCACTTTTCCTTGCGGGAAAGTGGTTTTTTTA	-17.5	88.6	yjbQ+227
1247681	+	15.19	CAGCTTAAATACAAGCCGATGAGATCACCAGCTGATGGTGATCTCTTTTGC	-20.7	69.23	yjbV+29
1248447	+	20.44	GATTTCAACTCTATCTTAAAAGACATCGAAGAGCGTGCACCGCTTCGCCGC	-6.7	2.76	fabI_CDS
1248608	+	1299.88	CCGCTAAGCAGGATCTATATCAAGCAATCCCGAATAGGGATTGCTTTTTTA	-17.4	95.88	fabI+44
1253683	-	138.38	AGACAGCCCTTGCATCATTAACAGCCCGGCAGATTACTGCCGGGTTTTTAC	-19.3	81.97	yjcD+30
1256358	-	37.25	TTTTTACTGCATATAAAAAAACCGTTCTCTGGTATGAACGGTTTTTTATAC	-15.6	85.71	yjcF+78
1256403	-	263.81	CAAATGATGAAGGACTGAACGCATCCGGATCTTTTGAGATCCGGATTTTTA	-15.2	81.71	yjcF+33
1258466	+	79.38	AGATAAGAAGAAGCGTTAAACCCCTTCTTCTTATGAAGAAGGGGTTTTTAT	-21.2	57.14	yjzE+2103
1262862	+	2986.81	GCGCTACCTTGACAGGGTAGAGGTCGCTGGTTCGAGCCCAGTCGGAATCAT	-15.2	24.53	yjcJ+2084
1262863	-	17	CGGCTTTATTAACGCAAAGTAAAAAACCCTTGCTGCGCAAGGGTTTAAGCT	-16	0	yjcM+839
1262896	+	2153.75	AGCCCAGTCGGAATCATAGCTTAAACCCTTGCGCAGCAAGGGTTTTTTACT	-15.5	92.54	yjcJ+2118
1263607	-	1126.38	AGCTGTTGGGAAAGCAATCCCCTGATCTAGAGTGGTTCAGGGGATTTTTGT	-21.1	89.64	yjcM+95
1263651	+	20.94	TAAATTACAAAAATCCCCTGAACCACTCTAGATCAGGGGATTGCTTTCCCA	-15.2	22.22	yjcJ+2873
1263927	-	13.44	AGATCATACATTTTAAAAGCTGGCGGAATAAAAATGAAGACTGTTTCTGAT	-2.3	0	yjcM_CDS
1263943	-	23.5	TAATGCAGGAGCCTTTAGATCATACATTTTAAAAGCTGGCGGAATAAAAAT	-7.1	17.94	yjcM_CDS
1264101	-	20	TACGCTGCAATGAAATATGCAGAAAAATATGCCTTAAAACCAAATAAAAAC	-5.8	0	yjcM_CDS
1264186	-	11.38	AGATAAACCAGTAAGTATGAACTTCAATGCTGCTAACTCTAATCAACTAAC	-5.2	0	yjcM_CDS
1264339	-	20.5	TAAGCAACTAAATGTAACACAATTAAATAATTCTTCTTCAACTCTACAATA	0	0	yjcM_CDS
1264377	-	12.69	TCTAATCAACTAAATGTAATACCATTGAGTAATTCTTCTAAGCAACTAAAT	-2.6	19.77	yjcM_CDS
1264452	-	14.75	AAAACAACTTCTAATAAACAAAGTTCTCAATCAACAAATACTTCTAATCTA	0	2.69	yjcM_CDS
1264500	-	10	GAAAAAGTAACAACATCTCTGGGCGATAATATTAAACTTGAAATTCCCAAA	-2.9	18.63	yjcM_CDS
1264511	-	10.81	TTTTTGGTGTTGAAAAAGTAACAACATCTCTGGGCGATAATATTAAACTTG	-6.1	0.21	yjcM_CDS
1265217	+	15.19	AGCAATCAGACACGAAATTTATAAAAGAGGATATCCCTACCAAAGCTACTT	-1.8	0	yjcN_CDS
1265248	+	20.44	TATCCCTACCAAAGCTACTTTGCAGTTCTCCAGAAAAGAGAAGGAGACAAT	-7.7	0	yjcN_CDS
1265268	+	34.06	TGCAGTTCTCCAGAAAAGAGAAGGAGACAATGAATCTGGGAATCTTTATTA	-7.4	0	yjcN_CDS
1265445	+	13.31	GAATAAGTCCAAGACGGAAAGCCTGCGGACACTGATCGTTTTACAGAGAAA	-6	15.05	yjcN+68
1265473	+	786.06	ACACTGATCGTTTTACAGAGAAATTTGTGCTTCGATCGGTGTCCGTTTTTT	-18.6	95.6	yjcN+96
1266460	+	68.31	GTAAAACCTCCCAGTGGTAAGCGAGGATCAACTCAACTGGGAGGTCTTACA	-22.8	31.11	yjcO+112
1267441	+	48.56	AGATTAAAGATTGGATTAAATAATAAGAGCATCCTGCGGGGTGCTTTTTTT	-13.8	100	yjcQ+28
1269647	-	24.88	CATGAATAAAATAAGGTCCCCCTCTAAAAAGAGAAGGGACCTTATTTTCGC	-21.8	85.71	yjdB+86
1269690	+	84.69	ACTTGAAGCGAAAATAAGGTCCCTTCTCTTTTTAGAGGGGGACCTTATTTT	-24.6	93.62	yjdA+106
1272605	+	73.44	TTTTATCTCATTTGGATTATTAAAAGCAGGGATTATTCCTTGCTTTTTTTG	-15.5	85.71	manR+28
1272998	+	12	AAAAACTGCTGTCTGTGGGGGTACAGGACGGTATCCGCAAACCGGAAGAAT	-15.5	0.19	manP_CDS
1273125	+	24.56	GAAGAAACAAAATCCAATTTACCGTCATTTAATGAACGGCGTTTCATTTAT	-6.4	0	manP_CDS
1273449	+	11.56	CGGGGGGATTATTGCCGGGTTTTTGGCCGGATACGCGGCACTTTGGATCAA	-16.2	0	manP_CDS
1273584	+	10.75	GTTTGTGTTTTTGATCGGCGCGCCTGTAGCTCAAATTTTCGCCTCTTTAAC	-4.3	0	manP_CDS
1273769	+	14.81	GAAATTATGAAATTATGGGACCAATTGCTGTCGCCATTTGTATCCCCCCGA	-7.4	2.08	manP_CDS
1276290	-	76.38	GTAGAGTCCTTAATTACAAAAGCAGGCACTGCGCCTGCTTTTGTTTGGATT	-22.6	14.29	yjdG+47
1276327	+	633.19	CACAGAGGTAAATAATCCAAACAAAAGCAGGCGCAGTGCCTGCTTTTGTAA	-20.8	86.25	yjdF+36
1278181	-	58.69	TTTGAAAGGGATGCGGAAAAAGCTTAATCGATATGACTAAGCTTTTTCGTT	-13.8	55.22	yjzH+24
1278221	+	58.69	GATATAGGGGAACGAAAAAGCTTAGTCATATCGATTAAGCTTTTTCCGCAT	-17.1	23.33	yjdI+56
1279513	+	37.44	GCTGTTTTTCCAAACAAAAAAGAGTCACATTAATGTGTGGCTCTTTTTGCA	-19.3	76	yjdI+1348
1282533	-	21.06	AGGCTCTTATTAAATAGAAAAAAGGCTGTCCGTACGGACAGCCTTTTCTAA	-21.6	100	yjfA+38
1283121	-	135	TAACCTCATACCAGAGGCGGCCAAGAACTCCATCCTCCCGGCCGCCTTTAT	-18.4	41.28	yjfB+48
1284359	-	11.88	CTGCTGGTTTTGGGAATCAAAAAGCGCCGCTGTATGTGACGCTTTTTTCAT	-13.1	20.69	yjgA+12
1289990	+	31.63	ATGCTAATTTACAGTTGCACGTTTTTCATCTGTGGAAAACGTGCATTTTTT	-16.8	55.88	yjhA+51
1290644	-	18.5	AAAAACACATTACATTATAAAAAAGAAAGAGCCCACAGGCTCTTTCTTTTT	-18.4	90	yjiA+31
1293738	-	188	AAAAAATATTTAAACAGAAAACCGAAATCAAATTGATTTCGGTTTTTATGT	-16.7	97.94	yjzI+38
1294954	-	36.19	AATGAATGACAGACAAAAGCCGCTTTCCGAGGGAAAAGCGGCTTTTTGTAC	-20.5	83.33	yjkA+42
1294994	+	104.81	GGAATAACAAGTACAAAAAGCCGCTTTTCCCTCGGAAAGCGGCTTTTGTCT	-21.4	41.25	hemD+44
1296580	-	162.63	TGACTGCGTAGCATCTGCAGGAGAATGGGTGAAAGCCTGTTCTCCTTTATT	-19.3	66.07	yjlA+40
1298488	+	10.25	AAAATAATACTGAATATGGCAAGATGAAAAACTGGGTAGTAAACATTTATT	-1.2	0	yjlB+265
1298530	+	14.44	ACATTTATTTTTGTAAATGATTGTGCATGAATTCACAATCCTTATTCTTAT	-8.3	0	yjlB+307
1298575	+	33.69	TCTTATGCCTTAAAAGCGTGAGACAGGGAGAGGCACTACCCTTTCCAAAAA	-18	0	yjlB+352
1298663	+	12.75	TGCCAGAAACAATCGATCAAACAAATGCGTCTGTCAGCCAAAGCCAGCAAG	-3.2	13.27	rex_CDS
1299049	+	16	CTTGAAGTCATGAACGAACGCGAAAACCAAAAATAATCTCAGATTCAAATT	-2.7	0	rex+15
1299272	+	16.38	TTGCTGCAGGCAACGTGTCTGAAAAAGCGGTTGCAATGCCATTAGAAAAAC	-10.2	0	ndh_CDS
1299619	+	19.25	GGTGTTGAGCTTGTTGGTGAGCTTGCTGACATCATGCCGAACCTTGCGAAA	-12.7	5.07	ndh_CDS
1299646	+	17	GACATCATGCCGAACCTTGCGAAAAAATACGGCGTAGACCATAAAGAAATC	-6.7	0	ndh_CDS
1299734	+	10.75	CTGTTCTTCCGGATGATCTTATCGAGCGTGCGACTGCAAGCCTTGAAAAAC	-8.9	38.84	ndh_CDS
1299909	+	14.25	ATTAGTCGGTGAATCAGGCCTAGAAGTGAACCGCGGACGCGCGACTGTAAA	-9.8	0.81	ndh_CDS
1300270	+	13.5	CATATTAAAGGACTTTTCAGCCTGGCTTACTAATCCTTTTAATGAATCTGG	-7.2	39.68	ndh+18
1300318	+	2633.94	TGGCATTGCCAAAAGCATTCCTTTCCGAGTGCTTTCTGGCAATGTCTTTTT	-26.8	99.77	ndh+66
1309830	+	45.81	TCAGTCAGACGATTGACGACGTGATGTCCCGTTTTTCAGCGGGCATTCTTT	-15.5	52.27	exuR+27
1313796	-	278.25	CATGTAGCGTAAACAAGAAAAAAGATACCTGTTAAGAGGTATCTTTTTTTT	-17.4	97.84	yjoA+44
1315763	+	80.44	GGTTTTCACTAAAAGAAAGCACGGGTGTTTGAAAAACCCGTGCTTTTTTGT	-21.3	92.86	yjoB+39
1316080	+	10	TTATTCTTTAATGGAGTTCAGGCACCGTGTCATGCTGGATTACATTAAGCC	-12.1	0	rapA_CDS
1316101	+	38.06	GCACCGTGTCATGCTGGATTACATTAAGCCTTTTGGAGAGGACACGTCGCA	-11.8	11.52	rapA_CDS
1317134	-	71.56	GATAAAAGAATGGAAGCTGAAGAAATAAAAAGCCCTAAGGGTCTTTTTTTA	-6.5	69.77	yjpA+23
1317153	+	27.56	CATATTGCGGCACGCAATCAAACATGATGCATAAAAAAAGACCCTTAGGGC	-6.8	90	phrA+24
1318489	-	83.25	GTTTGTATGTAAGGCGAAAAGACGGAAGCTTCACAGCTTCCGTCTTTTCAT	-24.6	50	yjqA+39
1320568	+	49.75	AAATGTTAGGTTCTCTTCTGGGCTGAGGAATATATCCTCAGCCCGTATTTG	-21.1	44.44	yjqC+42
1321207	-	97.44	AAAGGGAAAGATTTCTACACTACCTTCCAGTCCTATACGGGCTTTTCTTTC	-7.1	48.75	xre+122
1321402	-	22.69	TCCGGACCTGCAGCTTGCATACCGCGATATGCAGGATTTTTCCCCAGAAAG	-15.3	1.05	xre_CDS
1334299	+	15.13	CAAAGCTGAATCAGCCCATACGCAGACCTTTCTCAGAAAGGTCTGTTTTTT	-18.8	10.85	xkdM+52
1348191	-	26.38	AAAAGTTGAAGAAGAAAAAATAAATCCCGGAGCGGCTCCGGGATTTTTATG	-16.7	50	spoIISB+251
1348225	+	21.69	TAAGCTGATCAAAGACCATAAAAATCCCGGAGCCGCTCCGGGATTTATTTT	-17.2	42.86	xlyA+43
1348398	-	227.25	AGCATGATCACACTAAAAGGACAAGGGAAAACAGCTCTTGTCCTTATTCCT	-15.4	53.68	spoIISB+44
1349433	-	799.19	AAATATGATATTTTAATGTCACACCGCTTCTGTCAAAGGAGCGGTTTTTTT	-18.5	91.97	pit+35
1349479	-	39	CGCTTCCGATTTCAGCGACACTTGGTGCCATCGCCTACTTTATTTTAAATA	-6	11.49	pit_CDS
1349620	-	27.94	TTTTCGGCGCCACGTTTATTCATTTGCCGGTCAGTACAACCCACGTCATTT	-5.4	8.25	pit_CDS
1349647	-	11.44	CCGCTGACTTAACCGGAGCAGCCATTATTTTCGGCGCCACGTTTATTCATT	-9.7	0	pit_CDS
1349728	-	11.69	TCGGAACATCAATCGGCGGCTGGAAAATCATCAAAACCGTTGGCGGAAAGA	-8.4	0	pit_CDS
1349837	-	33.75	CAAAAAGCAATGGGAATTATCACAATGGCTCTCATCACAGCGAATTTACAT	-5.1	2.73	pit_CDS
1349877	-	24.06	AGCTGCCCTGCAATCGTATACACACGGAACAAACGATGCGCAAAAAGCAAT	-9.4	11.09	pit_CDS
1350027	-	18.5	GGGCTTCATTAAAATCATTGAAGCACTGATTCTATCACCAATTATTGCCTT	-7.4	0	pit_CDS
1350176	-	36.81	GTTGTCATTTTGGCTGCGCTACTCGCTGCAATTGCCTGGAACCTTATCACA	-7.4	0.24	pit_CDS
1350234	-	26.25	TGTTGCCAAAACCATTACGAAAGACATCGTAGATCCTTATACGCTGGAAAA	-7.2	14.26	pit_CDS
1350270	-	21.5	TGTGATGAACTTTGTCGGAGCAATGACGTTTACAGGTGTTGCCAAAACCAT	-6.8	0.75	pit_CDS
1350285	-	19.63	CATTATATTGGCTGCTGTGATGAACTTTGTCGGAGCAATGACGTTTACAGG	-9.1	0	pit_CDS
1350319	-	17.94	CGGTATCAACAAAAGCGTTAAAACCGCGCCATGCCATTATATTGGCTGCTG	-13.2	0	pit_CDS
1350469	-	12.63	CCAATAATCTTGAAACCATCATTATGAAAAACGCGTAACGAGGGGTAAAAA	-5.6	51.2	pit_CDS
1350802	-	10.5	TGGATGATGTGCTTGACGGAATCGAACATTTCTCTGCCATGATGGAGATTT	-7.9	0	ykaA_CDS
1350956	-	16.44	GTCACTAACCAAACGACTCTTAAAGAATTTGCAGATACGTTAAAGGAATAT	-3.9	0	ykaA_CDS
1351339	-	110.31	CGAAAAGCAAGCTGATAAAACGGTTCCCTTGTTTAGGGAACCGTTTTTTGG	-20.4	82.95	ykbA+36
1354073	+	16.56	TCCAATAAATTGTGATTCTTTTGCCTTCCGGCGCCGCCGGAGGGCTTTTTT	-20	100	mhqA+43
1357419	-	101	CGTGCTCAGAGCATAAAAACCCCCTGTCCATTACGGACAGGGGGTTTGAGG	-29.1	83.72	htrA+517
1357894	-	66.81	ACTTCGTAAGACATAATGCCTCAGGCCGTAAAAGCGGTCTGAGGCTTTTTA	-23.7	96.67	htrA+42
1360296	+	53.06	ACAGAACAGGTTGGTAAACAAACATGAATCCTTGAAAGAGGATTCTTTTTT	-10.8	100	proG+24
1369836	-	391.81	ATCAAGTATAAACAAATGGAGTGGCTCTAGTAAAAAGGAGCCACTCTTTTT	-19.2	95.86	ykgB+40
1372592	+	67.44	AAGCCTTGGTGAACGTTAAACCCAAAACATAAGTTGTTTTGGGTTTTTTTG	-15.5	89.58	ykhA+39
1376436	+	28.69	CATACGCGTAAATAGAAGCGCGTATGCACACGGAGGGAAAAAAGCCCGGGA	-16.4	24.58	ykkB+141
1376476	+	173.19	AAAGCCCGGGAGAGTCAATCTCATGTGAGACGACTGTCCGGGGTTTTTTTG	-25.4	79.25	ykkB+181
1378179	+	468.19	CAATCGTCTTTAACTAGACTGCAAGAGGCCCGCGCAATGCGGGCTATTTTT	-17.8	72.16	purU+34
1378410	+	32.88	CATAACCTGGCGTTACAGGAGAGCGGAGCGTGCACAAGCGCGTTCAATCAA	-20.1	32.47	purU+265
1378441	+	130.13	GCACAAGCGCGTTCAATCAAGGTGGTACCACGGAAACCCATTTCGTCCTTA	-5.6	31.74	purU+296
1378468	+	736.31	CCACGGAAACCCATTTCGTCCTTATGAATCAGGATGAAATGGGTTTTTTTA	-25.1	52.06	purU+323
1380906	+	118.25	GGTAATGTTCAATGAAAAAGCTTATCTCATTACGAGATAAGCTTTTTTATA	-21.1	98.55	proA+54
1381406	-	16.31	AAACACTTCATCAAAAAAATTGAGGATGCCTTGTACAGGCATCCTCTTTTT	-18.1	100	ohrR+28
1381441	+	109.38	AGTTGCTGAATAAATAAAAAGAGGATGCCTGTACAAGGCATCCTCAATTTT	-19.7	87.76	ohrA+38
1383280	-	10.13	AGCTAGTATAATTTGAAAAAACCATCTGCATTTGGCAGATGGTTTTTTTCT	-20.2	100	metE+40
1385680	-	257.19	GTGTTTTACGTAGAAAAGCCTCTTTCTCTCATGGGAAAGAGGCTTTTTGTT	-23.9	60.98	ispA+344
1385730	-	13.56	AAGGCACGGTGCTAATTCCATCAGATTGTGTCTGAGAGATGAGAGAGGCAG	-9.9	80.43	ispA+294
1388068	+	157.63	AGCATTAAACTATCATCAATAAAAAAATCCGCTATCTGTGATAGCGGATTT	-15.7	91.67	rsbRB+29
1391673	-	525.94	TGCGCTTAATCGATCTATGACTGCATATTCCCTTAGGATATGCAGTTTTTT	-14.8	99.21	tnrA+5738
1391739	-	15.69	TTATGACCCGATCTGGATAATACCAGCGTGGGGAAGTGCAGGTTGACCGAA	-12.6	14.32	tnrA+5672
1391827	+	29.06	GATCGGGTCATAAGGGATCAAAGCGCGTTTCTTCCGCGCTTTATCTCAGCC	-16.8	72.73	rsbRB+3788
1395320	+	26.81	ACAGGAGATAGATGACTAATCAAAACCCCCGCTGCAGCGGGGGTTTTTCAT	-20.9	84.62	ykoJ+32
1395782	+	89.81	ATGCTTGTCCTATGCCATACAGTGCTAAAGCTCTACGATTGAAGGCGCCCG	-5.3	16.9	ykzD+274
1395814	+	17.81	CTACGATTGAAGGCGCCCGCACGCTTTTTTTGCCGTGCTTCTTTCACCTTC	-11.5	0	ykzD+306
1395832	+	72.94	GCACGCTTTTTTTGCCGTGCTTCTTTCACCTTCAATCCCGAAGGCTTTTTT	-14.2	0	ykzD+324
1395976	+	225.25	CAAGACAATTGATTACACGATGAGGAGACGAACTGCCGCACCTTCTGGCGA	-5.1	18.91	ykzD+468
1397370	-	47.56	AAACCGTTAAATAATAAAAGTCCGGCTCGCAGTTGAGACGGACTTTTTACG	-15.2	67.86	tnrA+41
1397409	+	133.31	CTCATTATAAACGTAAAAAGTCCGTCTCAACTGCGAGCCGGACTTTTATTA	-15.7	81.82	mgtE+41
1398997	+	115.19	TGCTGTTTCGTTAACTATTCTACACTCTCTATTTCAGGAGAGTGTTTTTTT	-12.7	88.24	ykoM+37
1407311	-	44.06	GAACAATTCATTATTGAACAGCCGTCGCAATAACAGCGCCGGCTTTTTTTC	-14.8	66.67	dgcW+18
1410724	+	11.5	CGTCATTTCATGGATTGTATCCATCGGCTTTGTTGGCATGCCTGAATTCAT	-9.4	19.59	ykoY_CDS
1410768	+	459.56	AATTCATGTCTAGCAAGACCTTTGCCTTATGTCGGCAAAGGTCTTTTTTGC	-19.2	45.82	ykoY_CDS
1411665	+	27.94	GTGAACGGGCGTAATCTGAAAGACTCTGCTTAAAAGCAGAGTCTTTTTGTG	-20.8	80	ykoY+37
1412777	-	13.75	AAGGGCGCAGTTTAAAAAAATCAAAAAAGCTGGCCCTTCTGCCCATGCGTG	-16.4	33.33	sspD+1023
1412834	+	13.88	GGGCAGAAGGGCCAGCTTTTTTGATTTTTTTAAACTGCGCCCTTTCAAAAT	-13.7	43.82	rsgI_CDS
1414090	-	414.94	AGCAGACATTCTATAGTCTGCGCCACCCCGGCTCAGAGGCCGGGGTTTTAT	-27.9	93.66	ykrK+35
1415110	+	13.94	GTTTTGTCTGTTTTAAGCTCTGTTACAGGAGTCGGGACGTACTTTACAGCT	-9.5	9.79	ykrL_CDS
1415139	+	28.56	AGTCGGGACGTACTTTACAGCTGATGGCGGTATCGATCCAATGGCGCTTCT	-9.8	2.91	ykrL_CDS
1415426	+	10.44	CGTCAAAACGCCGTTCACTTGTCGCAGTATCGTCAGGGCTGCTGGAGCAGA	-9.7	16.63	ykrL_CDS
1415503	+	13.06	CTTGCCCACGAGGTCGCGCATATCACAAATGGTGATATGGTAACAATGACG	-13.9	0	ykrL_CDS
1415937	+	472.19	TAAATAATACAAACACATTGTTCCTCTGAGAGAATTCTCAGAGGTTTTTTA	-16	96.44	ykrL+44
1417449	+	162.63	AGAGTGATTATCGGATAGGCAAAACACCGCATATTTTGCGGTGTTTTTTGA	-16	94.25	ktrD+33
1422175	+	27.69	AAAAAAACCGCTGACTCGGCTCCAAATGAGCAAAGTCCAGCGGTTTTTTAA	-27.1	77.27	ogt+252
1424476	-	81.88	AGGCGGACATAGATGTTAAGCCTCCTTCTCTCTGAGAAGGAGGCTTTTTTA	-23.6	90.48	mtnU+291
1425382	+	32.88	GCCGTTTTCTTCAGCCAGCTCTGAGCGGAGCGGCCGTCTTCGTCAGCGAGT	-17.3	18.18	ogt+3459
1426982	+	50.25	AAAGCACGGTGCTAATTCTTGCAGCTAGCGGCTGAGAGATAAGATTCGGAC	-11.5	35.76	ykrV+145
1427032	+	535.81	CGAGAAACGAAACCTCTTTAGACGCGATTGCAGTTTGAAGAGGTTTTTTGA	-20.5	80.69	ykrV+195
1430124	-	99	GGCGTTTGCAATAAATATAAAAAGCCCCGTTCGATGAACGGGGCTATCTCA	-19.4	12.63	ykvA+37
1430158	+	53.44	CGTGAATCAATAAGCGTGAGATAGCCCCGTTCATCGAACGGGGCTTTTTAT	-20.4	77.78	mtnD+38
1430996	+	222.63	CTATCAGATGCATATATAAAGAGAGAGCTTTTCGGAAGCGCTCTTTTTTTC	-12.2	52.31	spo0E+55
1431456	-	163.19	CTCCCCGTATCCGCATCATAGCCCCCCTGACCATGTCAGGAGGGTTTTTTA	-16.1	83.54	kinD+30
1431492	+	22.94	CCCGATCACGAAGATAAAAAACCCTCCTGACATGGTCAGGGGGGCTATGAT	-18	14.89	eag+34
1433634	-	80	GAAAAATAGCAAAAAAGGAAGCCTTGTGACATATCAGGCTTCCTTTTTTTA	-19	95.35	motB+42
1433654	+	16.69	GGATTAAACGCAAAACAGTTTCATAATAAGTAAAAAAAGGAAGCCTGATAT	-3.5	51.41	mhqR+18
1433676	+	345.56	ATAATAAGTAAAAAAAGGAAGCCTGATATGTCACAAGGCTTCCTTTTTTGC	-20	63.77	mhqR+40
1435592	-	44.94	GTGCGAGCAAAATAACAATCAGCGGTTTCCTTTTAGGAAGCCGCTTTTTTT	-17.2	100	clpE+36
1439345	+	1876.75	CCCTCTATAAAAAACTAAGGACGAGCTGTATCCTTGGATACGGCCTTTTTT	-11.1	57.19	ykvI+210
1439385	+	194.06	CGGCCTTTTTTATGTTTTTCTAGAGCACCTTCCGAAAAAAGGTGTTTTTTT	-9.8	12.52	ykvI+250
1442069	+	262.69	ATTGATAGTACAGAAGCAGATTAAGGCGTACAATTTGTACGTCTTTTCTTT	-12.9	99.35	ykvM+281
1442081	-	15	GATATTGATAATAATATTTAATGCCTATGATCTCTAGATAGGCATTTTTTC	-13	78.57	ykvN+266
1447031	-	188.25	TTTCATTAGAAAGCGGCGAGTGGAATTCCCCCCGGATTCGCTCGTCTTTTT	-14	69.44	ykvS+631
1447116	+	20.25	CCGCTTTCTAATGAAAAGACGGGATGCTGGATGGCAGCTCGTCTGTTTTAT	-16.1	44.44	ykzR+548
1447556	-	179.25	TTACATATGAAATTCGCTTTCTCAAAAGCTGCCGGCCGGCAGCTTTTTTAC	-15.1	95.95	ykvS+106
1448235	+	209.81	ACTTAGAACAGCCAAGAAGCTGAAGGTTTCTCATACGTGAGAAGCCTTTTT	-18.9	79.11	ykzS+28
1451163	+	55.19	TGAAGGAATGGACGGAAGAATAGCTGAGAGCATAGACTCTCAGCTTTTTTC	-17.6	100	stoA+28
1453280	-	49.88	AAAGCTTGATACATAAAAAGCCAGCAGCCTGATTAGGCTGCTGGTTTTATT	-24	78.57	ykwB+9533
1453317	+	27.25	TTAAGACTCCTAAAATAAAACCAGCAGCCTAATCAGGCTGCTGGCTTTTTA	-19.7	84.62	zosA+33
1453369	-	21.31	CTATCATAGGCTGTGCAGCGGGTTTCCTTTGCTGCACCCTCGCTCTCATCC	-17.1	8.19	ykwB+9444
1454828	+	157.25	TGTAATAGAAATAAAAAAGGACTTTGTTCTCGACATCGTCCTTTTTTATCT	-15.8	29.25	ykvY+46
1456972	+	41.56	GCTTCATCTGTACCGATTAACCAATAAAATTTCATAAATTCAGTTTATCCT	0	0	glcT+14
1457048	+	169.63	GCATGAGTGATTGAGGGAAAAAAACGGGAAGTTCATTCTCGTTCTTTTGCG	-11	0	glcT+90
1457076	+	258.63	AAGTTCATTCTCGTTCTTTTGCGCACCCAATTTTGCTCATGCCTTTTTGTT	-2.7	0	glcT+118
1457222	+	31.19	AGGAGGTCAATTCTTATGTTTAAAGCATTATTCGGCGTTCTTCAAAAAATT	-6.3	7.19	ptsG_CDS
1457271	+	107.13	TTGGGCGTGCGCTTATGCTTCCAGTTGCGATCCTTCCGGCTGCGGGTATTT	-15.7	3.55	ptsG_CDS
1457293	+	471.13	AGTTGCGATCCTTCCGGCTGCGGGTATTTTGCTTGCGATCGGGAATGCGAT	-18	9.2	ptsG_CDS
1457335	+	19.13	GAATGCGATGCAAAATAAGGACATGATTCAGGTCCTGCATTTCTTGAGCAA	-9.4	0	ptsG_CDS
1457411	+	20.88	GTGATGGAAAGTGCTGGGCAGATTGTTTTCGATAACCTTCCGCTTCTTTTC	-9.1	0	ptsG_CDS
1457440	+	185.94	CGATAACCTTCCGCTTCTTTTCGCAGTAGGTGTAGCCATCGGGCTTGCCAA	-11.1	0	ptsG_CDS
1457483	+	48.19	CTTGCCAATGGTGATGGAGTTGCAGGGATTGCAGCAATTATCGGTTATCTT	-12.6	0	ptsG_CDS
1457488	+	52.63	CAATGGTGATGGAGTTGCAGGGATTGCAGCAATTATCGGTTATCTTGTAAT	-13.3	0	ptsG_CDS
1457584	+	268.69	TTCGGATTCAGTTGAAAGAGCCAAGTTCTTTACGGAAAACCATCCTGCATA	-8.4	0.11	ptsG_CDS
1457647	+	47.81	TGGTATACCTACCTTGGCGACAGGGGTGTTCGGCGGTATTATCGTCGGTGT	-15.5	2.53	ptsG_CDS
1457661	+	52.19	TGGCGACAGGGGTGTTCGGCGGTATTATCGTCGGTGTGTTAGCTGCATTAT	-11.1	10.38	ptsG_CDS
1457702	+	28.31	GCTGCATTATTGTTTAACAGATTTTACACAATTGAACTGCCGCAATACCTT	-6.8	0	ptsG_CDS
1457734	+	96.06	TGAACTGCCGCAATACCTTGGTTTCTTTGCGGGTAAACGTTTCGTTCCAAT	-8.2	3.41	ptsG_CDS
1457761	+	55.69	TGCGGGTAAACGTTTCGTTCCAATTGTTACGTCAATTTCTGCACTGATTCT	-9.1	15.13	ptsG_CDS
1457764	+	55.69	GGGTAAACGTTTCGTTCCAATTGTTACGTCAATTTCTGCACTGATTCTGGG	-4.4	13.56	ptsG_CDS
1457852	+	44.25	GGATTGAATGCCTTTTCAACAGGATTAGTGGAAGCGAATCCAACCCTTGCT	-8.3	3.02	ptsG_CDS
1457872	+	10.56	AGGATTAGTGGAAGCGAATCCAACCCTTGCTGCATTTATCTTCGGGGTGAT	-11.5	0	ptsG_CDS
1457907	+	44.94	TTATCTTCGGGGTGATTGAACGTTCGCTTATCCCATTCGGATTGCACCATA	-11	21.32	ptsG_CDS
1457910	+	42.88	TCTTCGGGGTGATTGAACGTTCGCTTATCCCATTCGGATTGCACCATATTT	-11	0	ptsG_CDS
1457946	+	251.94	GATTGCACCATATTTTCTATTCACCGTTCTGGTATGAATTCTTCAGCTATA	-2.8	1.8	ptsG_CDS
1458050	+	37.75	ATTAAAGACGGCGTACAGTTAACGGCAGGTACGTTCATGACAGGTAAATAT	-7.2	0	ptsG_CDS
1458053	+	35	AAAGACGGCGTACAGTTAACGGCAGGTACGTTCATGACAGGTAAATATCCA	-7.8	0	ptsG_CDS
1458088	+	36.19	GACAGGTAAATATCCATTTATGATGTTCGGTCTGCCTGCTGCGGCGCTTGC	-9.4	0	ptsG_CDS
1458138	+	30.38	CCATTTATCATGAAGCAAAACCGCAAAACAAAAAACTCGTTGCAGGTATTA	-4.5	8.72	ptsG_CDS
1458186	+	41.94	TTATGGGTTCAGCGGCCTTGACATCTTTCTTAACGGGGATCACAGAGCCAT	-10.3	17.12	ptsG_CDS
1458258	+	49.75	TTGCTCCAGTCCTGTTTGCGATTCACTGTTTGTTTGCGGGACTTTCATTCA	-14.2	13.82	ptsG_CDS
1458282	+	49.88	ACTGTTTGTTTGCGGGACTTTCATTCATGGTCATGCAGCTGTTGAATGTTA	-9.5	0	ptsG_CDS
1458404	+	22.56	TGGTGGCTTGTCATCCCTGTCGGCTTAGGGTTAGCGGTCATTTACTACTTT	-13.8	0	ptsG_CDS
1458466	+	191.25	TGCCATCCGCAAATTTAATCTGAAAACACCTGGACGCGAGGATGCTGCGGA	-8.1	0.94	ptsG_CDS
1458514	+	18.13	GGAAGAAACAGCAGCACCTGGGAAAACAGGTGAAGCAGGAGATCTTCCTTA	-19.8	0	ptsG_CDS
1458606	+	12.56	ACCTTGATGCTTGTATCACTCGTCTGCGTGTGACTGTAAACGATCAGAAAA	-8	0	ptsG_CDS
1458647	+	26.56	GATCAGAAAAAGGTTGATAAAGACCGTCTGAAACAGCTTGGCGCTTCCGGA	-8.6	0	ptsG_CDS
1458714	+	49.06	ACAACATTCAGGCTATTTTCGGACCGCGTTCTGACGGGTTAAAAACACAAA	-6.1	1.4	ptsG_CDS
1458763	+	136.25	AATGCAAGACATTATTGCGGGACGCAAGCCTAGACCTGAGCCGAAAACATC	-4.9	0	ptsG_CDS
1458821	+	26.69	GAGGAAGTAGGCCAGCAGGTTGAGGAAGTGATTGCAGAACCGCTGCAAAAT	-10	0	ptsG_CDS
1458876	+	51.06	TCGGCGAGGAAGTTTTCGTTTCTCCGATTACCGGGGAAATTCACCCAATTA	-13.3	0	ptsG_CDS
1458883	+	60.44	GGAAGTTTTCGTTTCTCCGATTACCGGGGAAATTCACCCAATTACGGATGT	-13.4	0	ptsG_CDS
1458892	+	61.88	CGTTTCTCCGATTACCGGGGAAATTCACCCAATTACGGATGTTCCTGACCA	-13.4	0	ptsG_CDS
1458941	+	12.94	CAAGTCTTCTCAGGGAAAATGATGGGTGACGGTTTTGCGATTCTCCCTTCT	-7.8	0	ptsG_CDS
1458984	+	28.13	TCCCTTCTGAAGGAATTGTCGTATCACCGGTTCGCGGAAAAATTCTCAATG	-6.8	0.78	ptsG_CDS
1458993	+	19.75	AAGGAATTGTCGTATCACCGGTTCGCGGAAAAATTCTCAATGTGTTCCCGA	-6.2	17.29	ptsG_CDS
1458999	+	18.25	TTGTCGTATCACCGGTTCGCGGAAAAATTCTCAATGTGTTCCCGACAAAAC	-9	17.12	ptsG_CDS
1459048	+	82.5	ACATGCGATCGGCCTGCAATCCGACGGCGGAAGAGAAATTTTAATCCACTT	-8.6	0	ptsG_CDS
1459180	+	14.56	ACTTCTTGAAGTTGATCTGGATGCAGTCAAACCGAATGTACCATCTCTCAT	-8.4	29.71	ptsG_CDS
1459188	+	22.44	AAGTTGATCTGGATGCAGTCAAACCGAATGTACCATCTCTCATGACACCGA	-6.9	25.5	ptsG_CDS
1459267	+	10.56	AACAGTCAGCATTAAAGCAAGCGGTTCAGTCAACAGAGAACAAGAAGATAT	-4.1	0	ptsG_CDS
1459285	+	22.81	AAGCGGTTCAGTCAACAGAGAACAAGAAGATATTGTGAAGATTGAAAAATA	-5.3	28.5	ptsG_CDS
1459332	+	192.31	AATAAGGGTGTTAGTACGCCGTGCTTGTCAGATGACAAGTACGGTTGTATG	-22.6	0	ptsG+46
1459520	+	11.44	CGACGCTGACGTTAATTTAGAATATAACGGCAAAACAGTTAACCTTAAATC	-4.4	0	ptsH_CDS
1459693	+	52.69	GCGAGTAATGCAAGAATTAAAAGGGATTGGTGCTTCAGCCGGCATCGCGAT	-9.1	0	ptsI_CDS
1459724	+	291.63	GCTTCAGCCGGCATCGCGATTGCAAAAGCGTACCGGCTTGAAGAGCCAGAT	-19.2	18.72	ptsI_CDS
1459780	+	10.69	GGTTGAAAAGAAAAACATCTCTGATTCTGAAGCGGAAGTAAGCCGTTTTGA	-9.4	0.58	ptsI_CDS
1459805	+	45.13	TCTGAAGCGGAAGTAAGCCGTTTTGATGAAGCGATTGCACGTTCAAAAGAA	-10.5	13.18	ptsI_CDS
1459813	+	44.88	GGAAGTAAGCCGTTTTGATGAAGCGATTGCACGTTCAAAAGAAGAGCTCGA	-8.9	10.22	ptsI_CDS
1459989	+	126.81	CAGTGAACGCTGAATTCGCTTTAAAAGAAACGTCTTCTATGTTCGTTACTA	-7.8	0	ptsI_CDS
1460051	+	24.81	ATGGACAACGAATATATGAAAGAGCGTGCGGCAGATATCCGCGATGTAACA	-7.7	0	ptsI_CDS
1460316	+	13.13	AAGCTGCTACAGGCACGATCCAAAACGGCGTGACTGTTATCGTTGACGGTA	-12.1	5.93	ptsI_CDS
1460320	+	13.19	TGCTACAGGCACGATCCAAAACGGCGTGACTGTTATCGTTGACGGTATCAA	-12.1	0	ptsI_CDS
1460334	+	12.63	TCCAAAACGGCGTGACTGTTATCGTTGACGGTATCAATGGCGATGTCATTA	-12	3.8	ptsI_CDS
1460342	+	13.56	GGCGTGACTGTTATCGTTGACGGTATCAATGGCGATGTCATTATTGACCCA	-10.9	6.59	ptsI_CDS
1460366	+	63.69	ATCAATGGCGATGTCATTATTGACCCATCTGCGGAAACTGTAAAAGAGTAT	-9	1.51	ptsI_CDS
1460419	+	10.69	AGAAAAACATAATGCTTATTTGGCTCAAAAAGCTGAGTGGGCGAAGCTTGT	-13.8	0.69	ptsI_CDS
1460699	+	62.5	CTTGATATCGGCGGAGACAAAGAGCTTCCTTACCTGCAGCTTCCTAAAGAA	-4.6	0	ptsI_CDS
1460719	+	18.31	AGAGCTTCCTTACCTGCAGCTTCCTAAAGAAATGAACCCGTTCCTGGGATA	-6.8	40.1	ptsI_CDS
1460726	+	11.69	CCTTACCTGCAGCTTCCTAAAGAAATGAACCCGTTCCTGGGATATAGAGCG	-6.8	30.42	ptsI_CDS
1460761	+	16.44	CCTGGGATATAGAGCGATTCGTCTTTGCCTTGAAGAGCAAGAAATCTTCAG	-10.7	3.77	ptsI_CDS
1460806	+	56.63	CTTCAGAACACAGCTTCGCGCGCTGCTTCGTGCAAGTACATACGGAAACTT	-9.1	5.46	ptsI_CDS
1460877	+	12.13	TTGCGACAGTTAACGAATTCAAAGAAGCAAAAGCGATCCTTCTTGAAGAGA	-5	0	ptsI_CDS
1460931	+	40.81	AAAAGCTCGTAAAAGCGGGACAGGCTGTATCTGACGATATTGAAGTCGGAA	-11.4	0	ptsI_CDS
1461108	+	55.44	TATCTTACCTGTATCAGCCATACAACCCGGCAATCCTTCGCTTAATTACAC	-3.5	0	ptsI_CDS
1461363	+	49.88	TGAGCACGACAGAAGAAGTTGTCGCGTTCGTAAAAGAAACATTCAAGTAAT	-12.2	10.83	ptsI+1
1461405	+	13348.4	TCAAGTAATGTACAAAAACCAGACGGCCTCCGGCCTGTCTGGTTTTTTTCA	-21.2	97.1	ptsI+43
1462829	+	66.31	AAATTGAATATTTCACTTAAACGGGCTGTTGTGATCAACAGCTCGCTTTTT	-15.9	96.15	splB+31
1465637	+	221.69	ACATTGTAATCCAATTACATCCCCAAACATCATTTGTTTTGGGGATTTTTT	-16.1	96	mcpC+42
1466635	+	83.69	CTTTGGGTGAAATAAAAAAAGATTGCCTGTACGAAACAGGCAATCTTTTTT	-20.8	100	ykwC+36
1469903	+	154.25	TAAAAAATAAAAAACAGGGTGCACAACTAAAAGATTGTGTGCCCTTTCTTT	-15.4	82.86	pbpH+41
1471843	-	421.13	ACGTGAAGCAATGCAGACGATAAACAACGGCGTTTAAGCCGTTGTTTTTAT	-16.3	92.42	patA+14
1473166	-	563.31	AATAGAACATGATACAATAAAGACAATCAAATCGCTGGTTGTCTTCTTTTT	-10.9	59.07	ykzT+74
1474507	+	16.38	ATCAGCAAGCCTGAGATCAGTGATTTGATTAAAAAAGTGGATACGTATGTT	-5.4	29.67	cheV_CDS
1474517	-	117.81	ACTTTTAAAATAAAAACAGCCGTGCCTCTTTCTGGCAACGGCTGTTTTTAT	-25	87.1	ykyB+43
1474558	+	43.94	ATTGAATAAATAAAAACAGCCGTTGCCAGAAAGAGGCACGGCTGTTTTTAT	-24.4	78.57	cheV+42
1475101	-	93.75	AATGCAGGTTAAAAATGCGCTTTTTTTCTTAGAAAAAAGCGCATTTTTACA	-20.3	69.74	ykuC+49
1476172	-	19.88	AGGTGGCAGAAAATTGTGATTGGATCAGAGCAGGCCTGACTGTCGTGCTTT	-9.5	6.89	ykuC_CDS
1481498	+	34.88	ATAAACTGCAAAACAAGCGAACGTTAAAACTGGTCGTTCGCTTGTTTTATT	-19.1	86.36	ykzU+47
1483493	+	73.44	ATTTATATGAGCAGGACGGACTGATTTAACGGCTGAAAGGCCGTTTTTTTT	-12.9	67.39	ykuI+22
1483643	+	1004.44	ATCAGATCAAGATCCGAAAAAACTTGGCGCTACCCCCGCCAAGTTTTTTAT	-16.2	36.84	ykuI+172
1484337	+	53.13	AAAACCTAACACATATCCGTTTGATAATATCGACATGGTTTCCATCGAAAT	-5.3	0	ykuJ_CDS
1484521	+	12.38	TGATTCTTTTCTGTTTTATAATCTTTCAGAAGCACAGATGACCTTTCAAGA	-3.7	0	ykuK_CDS
1484676	+	17	TTACCGCATTGCATTTGCATCGTACAGGCAAGGGAGCTTGGGGCTGCTTGA	-10.8	0	ykuK_CDS
1484834	+	863.69	GATATTACCGATCTGCTCCTGCCCTTTACCGGTGAGGGGGCGGATCTTACC	-20.3	28.3	ykuK_CDS
1485313	+	40.31	CCACCTACAAAAAACTTGTAACGCTATACGACCGATTTCGATTTGAAAATT	-2.6	31.17	ykzF_CDS
1485358	+	358.44	AAAATTAATGGGACACCCTATAATTGATACTCCACAAAGAGTATCTTTTTT	-13.3	59.81	ykzF+43
1485928	+	10.75	ACGCTCATTGAATAAGTAGGCTGTACGGTCCTATTTTTATTATATAGGCAG	-10.3	3.46	ykuL+32
1486951	+	62.88	TGCTGGATCAGGAAAATCCATTTTAAAGACAGCGAGGTGCTGTCTTTTTTT	-15.3	85.71	ccpC+25
1488908	+	95.88	GCGCTGTCTGATCACTCACTGGGAACTGCTAAAACGGCTGTTCCTTTTTTT	-10.6	28.89	ykuP+40
1489732	+	1519.38	AAGGAAAAGTTTGATAAAAAAGGCGTGGATAATATATCCACGCCTTATTCG	-19.1	59.01	dapH+49
1491218	+	42.25	AGAGCAGAATTCAGTAATAAAAAAACCGAAGCAAAAAGCTTCGGTTCTTTT	-13.9	70.21	ykuS+34
1493374	+	22.75	ATCTGACTAAATAGTATTTCCTAAAAACCTGACCTCATCAGGTTTTTTATT	-10.1	66.67	ykuV+53
1494405	+	148.81	ACGAATAAATATAAAGAAAAACTGCTTGGCATCGCTCAAGCAGTTTTTTTA	-18.4	93.42	rok+43
1499695	+	94.5	CCGCCGGTCAGCGGGGGATGAAAACCGGACGGCATTTCAGCCGTCCGGTTT	-31.4	93.94	moaD+30
1507325	+	243.5	ATTGAAGCGCTGCGTTATGAGTAGCCTCATGCAACATGCATGAGGTTTTTT	-18	99.14	yknZ+27
1511203	+	161.81	CAGAAAAATAAGAAAAAAAGCGTCCTTGGTTCGAAAGGACGCTTTTTCTTA	-19.7	83.33	fruA+40
1511579	+	15.19	GAAGCGCGGAGATATCGTTATTATCAACGGTGAAACTTCTAAAATCCATTA	-7.6	0	sipT_CDS
1511885	-	35.69	TTTTTCAAAATAAAAACGCCTGCTGTCCTAGGCCAGCAAGGCGTTTTTATT	-22.5	58.82	ykoA+38
1511927	+	88.44	TCAAACAAAATAAAAACGCCTTGCTGGCCTAGGACAGCAGGCGTTTTTATT	-23.4	78.57	sipT+38
1513749	+	12.13	GGAGAAAAGGTCCGCTGTATGCTGTCGAAAGCGATGCTTTCTGGCGCCAAT	-12.2	0	ykpA_CDS
1514024	+	316.5	GACTGAACTATACGCCGAATAAAAAAGCAGAGATTTCTCTGCTTTTTTTGA	-14.6	55.76	ykpA+29
1514961	-	121.38	AATTGGGCTTTTTAAGTAAATAAAAGGAGGCTTTTCCGCCTCCTTTTTTTA	-16.7	96.72	ampS+36
1514994	+	79.19	TGTATGAAGCAGAAAAATAAAAAAAGGAGGCGGAAAAGCCTCCTTTTATTT	-16.7	79.49	ykpB+31
1516298	-	12.19	TCATCCATAATATTGAAAAAACCCAAGACGTGTCGTTTTGGGTTTTTCACT	-18.5	80	ykpC+41
1518146	+	65.75	GGTGCACAGCTGCTTCTCGAAGAAATTCAAGCCGCTTTAAAAGAATAAAAT	-6.7	31.38	abh+3
1518190	+	606.75	ATAAAATTATGCTAAAAAAGGCGGAGTGATATCATCTCCGCCTTTTTTGCG	-23.3	82.95	abh+47
1521228	+	297.5	AGTTCTTCATACAAAATAGCAGCCAAATAAGCCGTCCTCAAAGGGCGGTTT	-12.9	75.15	ktrC+32
1523082	-	157.06	ATTATGGAGGTTTAAAAAAAGAGGCACTCCCTAAGGGAGTGCCTCTTTTTA	-27.4	100	rnjA+36
1526157	-	489.06	AATTGAGCGCTAAAAGAGAAAACGGCTGGCACAATGCCAGCCGTTTCTTTA	-24.1	95.73	def+38
1526193	+	96.19	TGGGCCTTTTAAAATAAAGAAACGGCTGGCATTGTGCCAGCCGTTTTCTCT	-21.9	78.26	ykrA+34
1527922	+	19.19	TGCTGCAGGCTATCGTGTGAAAAAGAGCTGACTCGATCAGCTCTTTTTTTG	-17.8	77.78	ykyA+20
1528303	+	32.69	TACCCTAAGTTTGTATGTATAAAAGGAATGCACGTCTAATGACTGTTTAAA	-5.8	0	ykyA+401
1528372	+	23	TAGTATGGCTGCAAAAACGAAAAAAGCTATCGTTGACAGTAAGAAGCAATT	-6.2	4.11	pdhA_CDS
1528412	+	81.88	AAGAAGCAATTTGATGCCATTAAAAAGCAGTTCGAAACGTTCCAAATTTTA	-3.5	0	pdhA_CDS
1528462	+	56.81	AAATGAAAAGGGAGAAGTCGTGAATGAAGCGGCGATGCCTGATTTAACTGA	-10.8	17.49	pdhA_CDS
1528500	+	11.69	CTGATTTAACTGATGATCAATTAAAAGAGCTAATGCGCCGCATGGTATTTA	-6.7	0	pdhA_CDS
1528532	+	15.63	ATGCGCCGCATGGTATTTACGCGTGTGCTTGACCAACGCTCTATCTCATTA	-8.7	5.14	pdhA_CDS
1528759	+	21.31	TTTCAGAGGAAACCAAATGCCTGATGATGTGAATGCCCTTTCTCCACAAAT	-4.6	0	pdhA_CDS
1528885	+	23.94	AATCACTTACACTGGTGACGGCGGAGCTTCTCAAGGGGACTTCTACGAAGG	-12.4	0	pdhA_CDS
1528963	+	10.81	ACCTGCAATCTTCGTGGTGCAAAACAACCGTTACGCGATTTCAACTCCTGT	-6.5	0	pdhA_CDS
1528990	+	26.38	CCGTTACGCGATTTCAACTCCTGTTGAAAAACAATCTGCAGCTGAAACAAT	-8.1	0	pdhA_CDS
1529258	+	12.13	CAAAAAGATCCGCTTGTACGTTTCCGTGCGTTCCTTGAAAACAAAGGCTTA	-7.5	0	pdhA_CDS
1529359	+	15.06	TAAGCAAGCGATCAAAAAAGCTGATGCTGAACCGAAGCAAAAAGTAACTGA	-6.1	0	pdhA_CDS
1529418	+	75.81	AAATCATGTACGAAAAAATGCCTCACAACCTTGAGGAGCAATTTGAAATTT	-6.3	1.1	pdhA_CDS
1529511	+	26.31	TGATTCAAGCAATCACGGATGCGTTACGCACAGAACTGAAAAATGACGAAA	-2.9	0	pdhB_CDS
1529702	+	40.44	TTAGGCTTAAACGGCTTCCGTCCGGTAATGGAAATCCAATTCTTCGGATTT	-10.7	0	pdhB_CDS
1529781	+	19.13	GCCAAATGGCTCGTATGCGCTACCGTTCTGGCGGACGCTGGACTTCACCTG	-12.5	2.15	pdhB_CDS
1529862	+	13.31	TTCATACTCCTGAACTTCACGCTGACAGCTTGGAAGGTCTTGTTGCACAAC	-5.8	20.38	pdhB_CDS
1529922	+	20.56	TCAAAGTTGTTATTCCATCAACTCCTTACGATGCCAAAGGACTTTTAATTT	-6.3	0	pdhB_CDS
1530183	+	11.38	CTGCTGAAGTTGTCGACCTTCGTACAGTAAGCCCACTTGATATCGATACAA	-5.2	8.9	pdhB_CDS
1530273	+	14.13	TTCAAGAGGCACAAAAACAAGCCGGTATTGCTGCAAACGTAGTAGCAGAAA	-10.9	0	pdhB_CDS
1530426	+	26.31	ACCATAAAGACGTTCTTGAAACAGCAAGAAAAGTGCTTGAATTTTAATCAA	-6.8	9.53	pdhB+4
1530469	+	557.69	TTAATCAAACTGCATAATCGAGAGGGAAGATGAACGTTTTCCCTCTATTAT	-15.1	0	pdhB+47
1530508	+	20.25	TCCCTCTATTATATATCTGTTTTCAATGCTTACGATGTAAACTTTAAAATT	-2.6	0	pdhB+86
1530882	+	12.25	CACAAGTTCAGTCAACTGCAGAAGCTGGACAAGACGTTGCGAAAGAAGAGC	-7	6.64	pdhC_CDS
1530902	+	15.5	GAAGCTGGACAAGACGTTGCGAAAGAAGAGCAAGCTCAAGAGCCTGCAAAA	-9.7	0	pdhC_CDS
1530981	+	48.69	CTGAAGTTGACCCGAACAAACGCGTGATCGCTATGCCTTCCGTACGTAAAT	-4.9	4.74	pdhC_CDS
1531011	+	13.38	CTATGCCTTCCGTACGTAAATATGCACGTGAAAAAGGTGTAGACATCCGTA	-14.4	0	pdhC_CDS
1531182	+	22.81	AACCGGCTGCTGCACCAGCTCCAGAGGGCGAATTCCCAGAAACACGCGAAA	-9.1	7.12	pdhC_CDS
1531211	+	13.5	GAATTCCCAGAAACACGCGAAAAAATGAGCGGTATCCGTAAAGCAATTGCA	-6.5	0.37	pdhC_CDS
1531438	+	15.5	CCCTGTTTTAAACACGTCAATTGACGATAAAACAGATGAAGTCATCCAAAA	-10.3	4.09	pdhC_CDS
1531672	+	19.88	CATCGGTTCTGCCGGCGGACAATGGTTCACTCCGGTTATCAACCATCCAGA	-14.1	0	pdhC_CDS
1531851	+	34.13	AAAATGCATTAAATCACATCAAGCGTTTACTGAACGATCCACAATTAATTT	-3.1	0	pdhC_CDS
1531956	+	161.81	CTTGTAATTGGTGCGGGACCTGGCGGCTATGTAGCTGCCATCCGCGCTGCA	-25.2	0.85	pdhD_CDS
1532064	+	19.5	AACGTTGGATGTATCCCTTCAAAAGCGCTGATCAATGCAGGTCACCGTTAT	-10.6	3.8	pdhD_CDS
1532104	+	34.44	GTCACCGTTATGAGAATGCAAAACATTCTGATGACATGGGAATCACTGCTG	-13	0	pdhD_CDS
1532249	+	16.38	CAAAGTAGATGTTGTAAAAGGTGAAGCTTACTTTGTAGACAGCAATTCAGT	-9.2	14.09	pdhD_CDS
1532277	+	10.75	TACTTTGTAGACAGCAATTCAGTTCGTGTTATGGATGAGAACTCTGCTCAA	-6.8	0	pdhD_CDS
1532297	+	20.19	AGTTCGTGTTATGGATGAGAACTCTGCTCAAACATACACGTTTAAAAACGC	-12.5	0	pdhD_CDS
1532608	+	14.31	AAGGCAACGTTGAAATCCATACAAACGCGATGGCTAAAGGCGTTGAAGAAA	-10.3	17.55	pdhD_CDS
1532643	+	20.88	AAAGGCGTTGAAGAAAGACCAGACGGCGTAACAGTTACTTTCGAAGTAAAA	-6	0	pdhD_CDS
1532657	+	13.19	AAGACCAGACGGCGTAACAGTTACTTTCGAAGTAAAAGGCGAAGAAAAAAC	-5.7	0	pdhD_CDS
1532670	+	18.69	GTAACAGTTACTTTCGAAGTAAAAGGCGAAGAAAAAACTGTTGATGCTGAT	-9.6	0	pdhD_CDS
1532741	+	13.88	ACGCCGTCCAAACACTGATGAGCTTGGTCTTGAGCAAGTCGGTATCGAAAT	-10.9	11.74	pdhD_CDS
1532766	+	16.31	GGTCTTGAGCAAGTCGGTATCGAAATGACGGACCGCGGTATCGTGAAAACT	-9.7	0	pdhD_CDS
1532989	+	32.06	CTGAACTTGCATCAGTTGGTTACACTGAAGCACAGGCGAAAGAAGAAGGTC	-10.1	25.03	pdhD_CDS
1533119	+	19.31	GCTGATCACTCGTAAAGAGGACGGTCTTGTGATCGGTGCGCAAATCGCCGG	-15	1.42	pdhD_CDS
1533123	+	19.94	ATCACTCGTAAAGAGGACGGTCTTGTGATCGGTGCGCAAATCGCCGGAGCA	-11.8	1.42	pdhD_CDS
1533284	+	103.25	GGAAGCTGCTGAAGTGGCAATCGGAAGTCCGATTCACATCGTAAAATAATT	-11.4	5.35	pdhD+2
1533290	-	24.25	TGCTGTCAAAATAAAAAAACAGCCCTCGCTCAAAGCGGGGCTGTTTTTGAT	-22.1	62.5	slp+37
1533328	+	5069.56	AATAATTTTCATATCAAAAACAGCCCCGCTTTGAGCGAGGGCTGTTTTTTT	-21.6	99.95	pdhD+46
1534240	-	182.94	GCAATTCAATAAAAAATAAAAAGCATGCGGCTTTAAGCCGCATGCTTTTTT	-23.1	100	speA+39
1534276	+	57.44	TTGATGAAGAGTAAAAAAAAGCATGCGGCTTAAAGCCGCATGCTTTTTATT	-23.6	94.12	ykzW+37
1534282	-	10.38	GACTCGACTTTACATATGATCCGGGTCATCAAAGAACAAAAAGCAATTCAA	-6.9	68.74	speA_CDS
1536201	-	141.13	AAGTAACACAAGCATAAAAAAGAGCCGGGATATCCCCCGGCTCTTTTTCTT	-22.2	96.43	yktB+34
1536237	+	21.88	GAAGATTAAGATGTAAGAAAAAGAGCCGGGGGATATCCCGGCTCTTTTTTA	-26.8	87.5	yktA+35
1538725	-	29.19	AAATAATTTTCAAATCATCAGAAGCCTCTCAATGTTTGAGAGGCTTTTTAT	-17.8	100	yktD+45
1539999	-	25.44	CTGTTGGATTGTAATATTAGGAAAAGCCTGAGATCCCTCAGGCTTTTATTG	-17.5	36.11	nprE+37
1545757	-	739.06	GCCGGCGACATTGTAATCAAAAAACACCGCAAAGAAAGCGGTGTTTTTCAT	-14.9	85.26	ylaF+63
1546696	+	10	CTTGATCCGAAACAACAGGATGAAAACATGGAAGCTTTATATGAAACCATT	-5.6	4.9	bipA_CDS
1547525	+	11.25	GTTACTCTACAGAATTCCTATCATTAACACGCGGATTCGGTATTTTGAACC	-5.3	3.38	bipA_CDS
1548117	+	12.13	GACCGGCAGCCTGCGGCAGGCATGTGGCTGCTGTACGGCACGATTTTTGTG	-21.5	10.5	ylaH_CDS
1548322	+	38	TTTTAATCATTTACAAAATCCGGCTGTATCAGTCGAAAAAAGGACAGTCTG	-6.7	60.83	ylaH_CDS
1548328	-	410.06	TAACCATACAGAACACAAAAAAGACTCAGCTTTCAGCTGAGTCTTTTATGA	-19	99.48	ylaI+61
1548364	+	501.06	GACAGTCTGCAAAATCATAAAAGACTCAGCTGAAAGCTGAGTCTTTTTTGT	-19	95.97	ylaH+31
1550623	-	280.38	ACTGTCTAAATATGGGTGATCAATTTGTTCAGGGTCGCCCATTAAGACAAT	-19.1	73.66	ylaL+174
1550960	+	10	AATGGACAATACTGTTCAGAGCGGTTTCCAGAGAAACGGCGGCCTTTCCCG	-12.7	19.35	ylaK+167
1552510	+	12	TTAAAAGTGGACGCTGAGAAGATTTTGAAGCTGATCCGAGTACAAATGGAT	-5.8	0	ylaN_CDS
1552514	+	11.06	AAGTGGACGCTGAGAAGATTTTGAAGCTGATCCGAGTACAAATGGATAACT	-5.9	0	ylaN_CDS
1552694	+	28.81	CATTGGAGCGCGAATTGTCTGCTTTGCATGACGCGTTTACAGCTAAATAAA	-9.8	15.42	ylaN+1
1552734	+	1483.69	AGCTAAATAAATGATAAAACTCAAACTTATTAACAGTTTGGGTTTTTTTAT	-12.5	90.65	ylaN+41
1553361	+	10.88	ATATCGACCATCTGTTAACGGGAGTAGCCCCTCCGGTAGTCATGACGCTTA	-8.2	9.35	ftsW_CDS
1554899	+	12.38	AGCAGGGCAATGTCGTCCATCTTTTTGAGAGGGATTGCTCCGTTCAAAGAC	-16.1	2.14	pycA_CDS
1556835	+	10.13	TATGTTCGGTGACATCGTCAAGGTAACGCCTTCCTCAAAAGTAGTCGGAGA	-8.1	11.7	pycA_CDS
1557672	+	902.25	AAAAGCATAAAAAACAAAGAGTGTATATCAATGATATACACTCTTGTTTTT	-20.3	93.33	pycA+41
1557993	-	175.19	GCAATCATAAGGACTCAAGACCAAAGCCTTAGGCGGCTTTGGTCTTTTTTA	-19.7	98.11	ctaA+41
1559442	+	14.06	TATTAAAATAGGGATCGTCAATTCTAACCTCATCACGACTTTCACTGGAAT	-3.3	4.6	ctaB_CDS
1559642	+	18.06	CGAAAGTAAGACCGACGGTTACGGGTAAAATTCAGCCGAGTCAGGCGTTAT	-9	5.47	ctaB_CDS
1559821	+	19.38	TATACGATTAACACAGTAGTAGGAAGCGTTTCCGGTGCAGTGCCGCCGCTT	-8	0	ctaB_CDS
1559871	+	11.38	TATTGGATGGACGGCAGTGGAAGGGAATATCGGTGTCGTAGCATGGGTGTT	-9.7	6.07	ctaB_CDS
1559980	+	20.13	ACTGAGGATTACAGAGCTGCAAATATTCCGATGCTTCCTGTCGTATACGGA	-7.3	7.61	ctaB_CDS
1560323	+	604.88	AACTAGTAAATGCCGCCTTGACCTCTTGTTTAATCAGGCGGCTTTACTTTT	-18.1	75.22	ctaB+97
[truncated: 2,658 more rows]

## Sheet: NusA depletion
3' End	Strand	CV	3' end and upstream 50 nt	ΔG-51nt (kcal/mol)	%T	Relative Position
18	-	12.56	CACAGGGGTTGGTAATGTGAAAATGTTGTCGATAACCTCTGTGGATACTAA	-16.6	13.64	misc.
271	+	22.44	ATTGATTTCACACAGCTTGTGTAGAAGGTTGTCCACAAGTTGTGAAATTTG	-15.6	0	misc.
858	+	68.19	CCTCGCAGTAGCGGAAGCGCCCGCGAAAGCTTACAACCCTTTATTTATCTA	-8.7	0	dnaA_CDS
1190	+	12.94	TCATTTCAAGTGACCGGCCGCCAAAGGAAATTCCGACACTTGAAGACAGAT	-13.2	0	dnaA_CDS
1839	+	179.06	TTCGGAAGTCATACACAGTCTGTCCACATGTGGATAGGCTGTGTTTCCTGT	-24.5	3.56	dnaA+89
1888	+	33.88	GTCTTTTTCACAACTTATCCACAAATCCACAGGCCCTACTATTACTTCTAC	0	8.36	dnaA+138
3000	+	55.31	GCACTAAAGGTGCTTGAAGGAGCAGAAATACGCGTAAGCTTTACAGGCGCA	-12.7	6	dnaN_CDS
3112	+	738	TCAGAACCTATTAATCCGATACACTGCTGCCGACCCGTCGGCAGCTTTTCT	-14.8	12.96	dnaN+37
3142	+	35.88	CGACCCGTCGGCAGCTTTTCTATTCGGTATCTGCTCCGACAAGTTTTCCCT	-11.5	15.27	dnaN+67
3780	+	11.13	TATTGAACAGCAAAAGCTCAGCCAGTATGTCGGGGCCCTCAACACCATTAT	-6.1	0	recF_CDS
4343	+	34.81	GACAGCAGCGAACGACGGCGTTGTCCCTTAAGCTGGCGGAGATTGACCTGA	-12	19.56	recF_CDS
4588	+	10.75	TTAGTGAAGTGAAGAAATGAGGTGAGCAATTGTATATTCATTTAGGTGATG	-4.1	8.14	yaaB_CDS
4772	+	21.81	CGTAGTCACGGTTCAGAATATATATTACTCTCCCTTATCTTCCAGCACATT	-1.1	0	yaaB_CDS
4790	+	12.94	TATATATTACTCTCCCTTATCTTCCAGCACATTAAAAAAACGTGCGCAATT	-4.3	0	yaaB_CDS
5889	+	13.94	GCGATTATTTCAATCAAACACCCTGATCCGCAGTTTGAGGGCCAAACAAAA	-8	0	gyrB_CDS
5955	+	15.31	TCAGAAGCACGGACGATCACCGATACGTTATTTTCTACGGCGATGGAAACA	-5.5	0	gyrB_CDS
5957	+	15.31	AGAAGCACGGACGATCACCGATACGTTATTTTCTACGGCGATGGAAACATT	-6.2	0	gyrB_CDS
6426	+	10.25	GTTGACGGCGCGCACATCAGAACACTGCTGTTAACGTTCTTTTACAGATAT	-10.9	0	gyrB_CDS
6782	+	11.13	CCGAAACTTCATAGAAGCGAATGCGAGATACGTTAAAAATCTTGACATCTA	-7.8	26.64	gyrB_CDS
6804	+	18.94	GCGAGATACGTTAAAAATCTTGACATCTAATCATAAAAAGCCTTATTTCCA	-3.7	0	gyrB+21
6827	+	324.5	CATCTAATCATAAAAAGCCTTATTTCCAATAAGAAATAAGGCTTTTTTCTG	-17.6	0	gyrB+44
7717	+	48.19	TGGGACGCAGCGGTATCCGGAAAGCATACGAATCAGGCCGAGGCTCTATCA	-10.1	0	gyrA_CDS
8309	+	12.19	AGCGATCCTTGACATGAGGCTCCAGCGTTTAACGGGACTGGAACGTGAAAA	-9.4	2.61	gyrA_CDS
8813	+	10.06	GGAGGTAGAAAAGGGTGAGTGGATCAACGCGATTATTCCAGTCACGGAATT	-11.3	0	gyrA_CDS
9281	+	16.31	CAACGGCCAACTAGTAGCAGTGAAAGCTACTAAAGGTGAAGAGGATCTAAT	-10.7	0	gyrA_CDS
9452	+	13.5	AGCTTTAGTTGAGAAAAACGAAGAAGATGAGAATGAAGAAGAACAAGAAGA	-2.4	81.93	gyrA_CDS
9494	+	745.06	ACAAGAAGAAGTGTGAAAAAAAGCGCAGCTGAAATAGCTGCGCTTTTTTGT	-21.2	94.83	gyrA+35
9670	+	28.88	AATGTTACTATTAAGTAGTCGCTTTGAGAGAAGCACACAAAGTTCTTTGAA	-8.1	0	gyrA+211
9755	+	27.81	TTTTATAAATCGCACAGCGATGTGCGTAGTCAGTCAAACTAGGGCCTGCAC	-10.9	5.63	gyrA+296
9784	+	78.94	TCAGTCAAACTAGGGCCTGCACGACGCAGGTCACACAGGTGTCGCCGCAGG	-17.3	77.05	gyrA+325
11430	+	59.56	ATATAAGACCTTGGGTCTTATAAACAGAACGTTCCCTGTCTTGTTTAGTTT	-13.6	0	gyrA+1971
11540	+	450.69	GCACGCCTGATAAGCGTGAGGTCGGTGGTTCGAGTCCACTCAGGCCCACCA	-18.9	0	gyrA+2081
11628	+	1694.44	CCTGCTTTGCACGCAGGAGGTCAGCGGTTCGATCCCGCTAGGCTCCACCAA	-19.3	21.01	gyrA+2169
11710	+	34.31	ATCACATTCAATTAGTAACACAAGATATCACATAGTGATTCTTTTTAACGG	-5	74.19	gyrA+2251
11716	-	10	CGTCCTTCATCGGCTCCTAGTGCCAAGGCATCCACCGTGCGCCCTTTCTAA	-7.5	100	misc.
14634	+	30.94	AGTGTGGCGACACATGGAGCTGACAGATACTAATCGATCGAGGACTTAACC	-8.8	87.5	gyrA+5175
15998	+	10.94	ACGTTCGACGATGTGCTGCTTGTACCAGCAAAGTCTGAGGTACTTCCGCGT	-10.8	0	guaB_CDS
16128	+	15.06	CAGAATCAGCAATGGCAATTGCAATGGCAAGACAGGGCGGCTTGGGCATCA	-9.8	9.63	guaB_CDS
16234	+	23	TTCTGAGCGCGGCGTTATCACAAATCCCTTCTTTTTAACTCCTGATCACCA	-5	0	guaB_CDS
16255	+	14.31	AAATCCCTTCTTTTTAACTCCTGATCACCAAGTATTTGATGCGGAGCATTT	-7.8	0	guaB_CDS
16450	+	35.13	AGTTACTGCATCTGTAGGAACTACTCTGGATGAAGCTGAAAAGATTTTGCA	-7.5	0.87	guaB_CDS
16521	+	10	TTCCTCTCGTAGATGACCAGAATAAATTAAAAGGTCTTATCACAATTAAAG	-4.9	1.81	guaB_CDS
16739	+	18.56	GGCGTTTTAAACACAGTCACAAAAATCCGTGAAACGTATCCCGAATTAAAC	-5.4	0	guaB_CDS
16835	+	17.38	ATCGAAGCTGGAGCAGACGTTGTCAAAGTTGGAATAGGGCCTGGTTCAATT	-6.7	0	guaB_CDS
16886	+	11.81	TGTACTACACGTGTTGTAGCCGGCGTGGGTGTTCCGCAAATTACAGCAATT	-12.5	0	guaB_CDS
17043	+	25.38	CTGTTATGCTCGGAAGCTTGCTTGCAGGCACATCAGAAAGCCCTGGTGAAA	-12.9	0	guaB_CDS
17072	+	10.75	ACATCAGAAAGCCCTGGTGAAACTGAAATCTACCAAGGCAGAAGATTTAAG	-10.3	0	guaB_CDS
17120	+	17.75	AAGGTATACCGCGGCATGGGATCAGTTGCTGCAATGGAAAAAGGAAGTAAA	-8.8	0.43	guaB_CDS
17146	+	11.13	TGCTGCAATGGAAAAAGGAAGTAAAGACCGTTACTTCCAAGAAGAAAACAA	-9.7	0.97	guaB_CDS
17376	+	51.19	GCCATCCGCATGACGTACAGATTACAAAAGAATCACCTAACTATACAATTT	-1.1	6.66	guaB_CDS
17398	+	74.56	TACAAAAGAATCACCTAACTATACAATTTCATAATAAATTGTTACAAATTA	-2.7	4.61	guaB+17
17435	+	1381.69	ATTGTTACAAATTAAAAACATTTGACAGGGTCTCTGACTCTGTCTATTTTT	-12.8	90.93	guaB+54
17745	+	18.06	TTACAGTAAAAATGCAGATAAGAGACTGCCAATTGCGAGTATGACAAAAAT	-6.9	2.83	dacA_CDS
18223	+	29.63	ATACTGGAGACTTCCAGTATCGCCAAAACGAAATTCAGAGAAGGCACCGAT	-13.7	12.58	dacA_CDS
18437	+	11.5	TAAACGCAAAGGGCAACCTTCATACAGGCCGTTTCGATGAAACGAAAAAAA	-8.3	0	dacA_CDS
18908	+	127.25	GGTTTTAATCAATTGAAAGAGCTCTGATGGATGTTAGGGCTCTTTCGCGTA	-20	0	dacA+43
18940	+	10.38	GTTAGGGCTCTTTCGCGTAATATACTGAAAAAACCCAATTTTTAATAAAAA	-7.1	0	dacA+75
19354	+	11.31	AGCGCGTATCGGACATATTGTTGAAGCGCGTGTGCTTGAAGCTATGGGTGT	-12.9	0	yaaD_CDS
19658	+	10.13	ATGACAGAAGCGAAAAACCTAGGTGCTCCTTACGAGCTTCTTCTTCAAATT	-9	0	yaaD_CDS
19707	+	14.81	TTAAAAAAGACGGCAAGCTTCCTGTCGTTAACTTTGCCGCTGGCGGCGTAG	-14	3.87	yaaD_CDS
20191	+	32.13	GTATCAATTCATGGAGCCGCTTCGTGAATTCGCTGCTCAGGGCAAACCGAT	-14.1	6.37	yaaE_CDS
20362	+	11.31	CTTTGAAGCTGATTTAACAATTAAAGGCTTGGACGAGCCTTTTACTGGGGT	-10	11.02	yaaE_CDS
20581	+	13	GGAATATAAGCAAAAGGCACTTGTATAAAACAGTTGAAAGCTGTGGAAACT	-7.2	0	yaaE+23
20844	+	2276.75	GGTGGCAACGCGAGAGCTCTCGTCCCTTTATGGGGATGAGGGCTCTTTTTA	-31.4	83.92	yaaE+286
22197	+	114.94	TGAAACCGTAAATTATGGAAAGGCGTGCCTGACAAGGTGCGCCTTTTTGCT	-22.4	86.76	serS+40
22385	+	130666	CGACAGGGGTGTCAAAGCCCGCGGGGGTTCGAATCCCTCTTCCTCCGCCAT	-17.9	75.28	serS+228
22418	+	64	TCCCTCTTCCTCCGCCATATTGATTTTAATTCTAATGAAACACAAGCATAT	-0.1	25.23	serS+261
22423	+	62.31	CTTCCTCCGCCATATTGATTTTAATTCTAATGAAACACAAGCATATATTGG	-1.9	67.32	serS+266
22464	+	1702.19	CATATATTGGAGATTGTTTTGTCCGTTGCATTCGGTGCGGCGGATTTTTTA	-14.9	82.06	serS+307
22469	-	57.81	ATTCATGATAATCAAAAAAAGTGAATCTCAGTCGAGATTCACTTTTTCTTT	-17.8	54.17	dck+27
22508	+	173.56	TTTTTTATTTTAAAGAAAAAGTGAATCTCGACTGAGATTCACTTTTTTTGA	-19.7	27.31	serS+351
23891	+	11.19	CCCCCATGAAAAAAAGACGTTTCCAAATTATCGAAACGTCTTTTTGACAAC	-15.1	0	serS+1734
26527	+	322.13	GAATCCCTTCTCGAGGTTCGTTTACTTTAAGGCCTGCCTTAAGTAAGTGGT	-13	0	tadA+190
26687	+	28240.4	AACTGCTTAAGTAACGCTTAGGGTAGCGAATCGACAGAAGGTGCACGGTAA	-8.1	92.49	tadA+350
26735	+	624.69	TAAATCAATCATCAAATTTTCAGACTCACCTAATATTAGGTGAGTTTTTTG	-14.6	32.2	tadA+398
27033	-	20.94	GACATCGGATATTGACCCGTTTGTTATCCCTTTACAGGCCGCACATTCGTT	-5.9	20.69	abrB+17815
27176	+	17.13	CGTGACATTCGCGATAAAGTGAAGTTTGCCCCATCGGCCGTCACATATAAG	-13.3	0	dnaX_CDS
28506	+	12.88	CCGAAGCGAAAAAGCTTGTTGGAGCGGATTTAATTGAAATAAAAGACTAAC	-5.9	0	dnaX+1
28935	+	15.81	ATATCAAAGCTGATTGACAGCTTTATGAAATTGCCAGGGATCGGACCGAAA	-8.7	13.93	recR_CDS
28959	+	396.63	ATGAAATTGCCAGGGATCGGACCGAAAACAGCGGTTCGTCTGGCTTTTTTT	-20.1	18.72	recR_CDS
29080	+	12.38	CATATTGTTCAGTTTGCGGGCATATTACAGATCAGGACCCTTGCTATATAT	-3.5	0	recR_CDS
29103	+	16.06	ATTACAGATCAGGACCCTTGCTATATATGTGAAGATACGCGCAGGGATAAG	-8.1	0	recR_CDS
29784	+	114.5	AGCTTGTACTAGAACAAGCGAAGGAGATGAGAAGATTCATGGAGCCTATTT	-12	12.86	bofA_CDS
29911	+	23.38	TGGCATCACAGCTGTTAAATTTGTGGCAGGTGCTTTGCTGCTGGTTTGTGT	-12.4	14.66	bofA_CDS
30203	+	243.5	TGTTATGATAATAAAGTCGCTTAAACGAGCGGTAAACAAAGTTCTTTGAAA	-6.2	58.46	bofA+168
30279	+	25.25	TAATTCATTTTTATAAATCGCACAGCAATGTGCGTAGTCAGTCAAACTACT	-10.4	57.89	bofA+244
31898	+	80.44	ATATAAGACCTTGGGTCTTATAAACAGAACGTTCCCTGTCTTGTTTAGTTT	-13.6	0	bofA+1863
32008	+	365	GCACGCCTGATAAGCGTGAGGTCGGTGGTTCGAGTCCACTCAGGCCCACCA	-18.9	0	bofA+1973
32096	+	1627.31	CCTGCTTTGCACGCAGGAGGTCAGCGGTTCGATCCCGCTAGGCTCCACCAA	-19.3	23.76	bofA+2061
32139	+	26.38	TCCACCAACGTGTTCTTTGAAAACTAGATAACAGTAGACATCACATTCAAT	-2.3	47.83	bofA+2104
32162	+	17.44	CTAGATAACAGTAGACATCACATTCAATTAGTAACACAAGATATCACATAG	-0.5	20.51	bofA+2127
32178	+	32.25	ATCACATTCAATTAGTAACACAAGATATCACATAGTGATTCTTTTTAACGG	-5	79.17	bofA+2143
35236	+	501.25	GCTCTCACATCCTGTGAGAAACGCCCAGTACCTTCATCCTGAAGGCATTTG	-14.4	0	bofA+5201
35236	-	10.94	TCCGTGTTCGGTATGGGAACGGGTGTGACCTCTTCGCTATCGCCACCAAAC	-11.5	99.39	abrB+9611
35746	+	91.25	AGCATTCATACACCGCCATTATATTCATAGACCTGAAAAGGTCTTTTTTTG	-8	46.75	csfB+21
37817	+	11.75	TTCTCATTCATTTCATGTTCCGGGACATCACAATGGAGATGTCTTTTTTGA	-8.9	0	yaaO_CDS
38600	+	20.81	AGAAGAACAAAAGCTTTCTGACATTCTGCAGCGGATAGAAACACTTAAACA	-3.7	0	yaaO_CDS
38873	+	36.63	TAGAAGCATCGATGAAGAGATTGAGAAAACGCCTCCGGATCAGACGTTTGT	-5.5	0	yaaO_CDS
39321	+	30.19	GAGAGCCAGGCGGAATAGATATTGCAGAACAAATTAGAGAGGTTATTCTGA	-4.2	3	tmk_CDS
40767	+	31.44	TTTTATATAATAGTATTGAGAAGGACAGACTATCACACGCTTATTTGTTTG	-2.9	42.72	holB_CDS
40854	+	39.38	TGCTTCTTGCAAAAAGCTTCTTTTGTCTGGAGGGTGGCGCGGAGCCTTGTG	-12.6	0	holB_CDS
41601	+	14.13	CGAATCAGATACTTGCTGTTTTAGAAGCAAAGAAACGGCTTCATTCCAATG	-7.9	0	holB_CDS
41703	+	17.75	AAGCTTGTACAATGTAATTGGTGTCCGCTTTAAGAAAGCGGGTAAAATATA	-9.8	0	yaaT_CDS
42896	+	442.81	AAATAAAAAATAGGGAAAAGGCTTCCGCATAAGACGGGAGCCTTTTTCAAA	-21.7	9.47	yabA+38
43602	+	15.5	TATCAAAGGCGGGCGCCCGGATTTGAAAATTCTTCCTCCCTTATTCGTATA	-7.7	0	yabB_CDS
43833	+	40.38	GTCCGGTTGAATTAATTTTTGCCGAGAGCTTTTCAACAAAGCGGGAAGCTA	-14	0	yazA_CDS
44796	-	1379.56	CATTTCTTGTACAAAAAACGTTCTTGTTATGACACAAGAACGTTTTTTTAT	-16.7	96.02	abrB+52
44817	-	55.5	AGCTTCAAAACCTTAAATAATCATTTCTTGTACAAAAAACGTTCTTGTTAT	-0.4	19.76	abrB+31
44831	+	140.63	TTACCATATTAAGCAATAAAAAAACGTTCTTGTGTCATAACAAGAACGTTT	-15.1	17.59	yabC+32
45037	-	12.13	GTAGTTATTCCTATCGAACTGCGTCGTACTCTTGGAATCGCAGAAAAAGAT	-6.2	16.7	abrB_CDS
45115	-	10.69	AACAAATAAGTATCTCTTGGGAGGAGAATGTTTATGAAATCTACTGGTATT	-5.6	0	abrB_CDS
45609	+	47	ATATGATTTGCACTTATCGCCGCTCTCGTCCTTTGGGCGGGAGCTTTTTGA	-18.3	0	yabC+810
45667	+	12.06	ATTAGGAGGTTTCAAGATGCCGCAAGAAAACAATACATTTTACATTACAAC	-2.9	0	metS_CDS
47680	+	70.38	ATAAACAAAAGGTGTTTCACGTGTAACAATTCGTCGAACACCTTTTGTGTT	-20	0.71	metS+53
48707	+	344.69	GCCTTTTAGATACTCTATATAATCTCTCCGAGGAGAAGGAGGCGTTTTTCA	-10.4	27.96	yabE_CDS
48879	+	12.88	ACAATCAGTCTCAGTTTCTATCAATGGCAAAAAGAAACATATACGCACACA	-3.9	5.01	yabE_CDS
49049	+	17.69	CAAAACCTGTGAAGCTTACAATAAACGGGGAAGAAAAGACGTTATGGTCAA	-8.5	0	yabE_CDS
49236	+	115.69	GAATGATGCAGGGAAACAAAAGAAGATCTGGACGACTTCGACTACGGTCGC	-6.1	8.72	yabE_CDS
49358	+	174	TGACGAAAGGAAAGGCTGATATTACAATTACTCGTATCGAAAAGGTCACCG	-4.6	12.04	yabE_CDS
49924	+	10	TTTTTCCCAGAGAAATCATCGGCGTACCGATGGGGAAATAAAACAGTCAAA	-13.2	19.11	yabE_CDS
49949	+	38.56	ACCGATGGGGAAATAAAACAGTCAAAATTAAAATCTTAAATTAGTATATAC	-1.7	2.82	yabE+7
49987	+	453.63	AATTAGTATATACTTATGTATTCAGAGGGTTTTGCGCCCTCTGTTTTTTTC	-15.8	40.95	yabE+45
51533	+	332.63	GCGCTGTCTAACGGATTGTATAAAGCCCTTTTCTAAAAGGGCTTTTTGTTT	-14.1	53.36	ksgA+15
52594	+	36.25	TCCAATTAACAGTTGAAAACCTGCATAGGAGAGCTATGCGGGTTTTTTATT	-19.6	76.19	yabG+42
52895	+	79.5	GCCGAAAAACGATTGAGCGTTCGGGCATTTTAGCTGAGACGTACCCTTCTG	-9	2.08	veg_CDS
53056	+	820.44	AGCTCAGTGGCATTTTAACGGGCAGTGAACCTTTTGTTTACTGCTTTTTGT	-14.6	78.88	veg+33
54898	+	17.94	CGTTGCCACGAAAGGCATCCCTCTTGCGTACGCAGCTGCAAGCTATTTGAA	-10.4	11.95	purR_CDS
55244	+	14.69	CTTTCAACCATCAACATGAAAGAGAAGTCCATTGAAATTCAGAATGGCAAT	-7.1	0	purR_CDS
55714	+	707.19	GTGAAATAATAAGAAAAGTGATTCTGGGAGAGCCGGGATCACTTTTTTATT	-21.1	51.18	yabJ+42
56225	+	892.31	CAAGGACTGCTGAAAGGGCTGACATAAGCCTTTTGCCGGCGGTCCTTTTTT	-27.5	96.34	spoVG+66
57697	+	14.81	TGGAAAAGCACTTGCTATTGCCAGAGCGAGACAAGTAAATAAAGACGATTA	-6.9	14.39	glmU_CDS
58181	+	16.75	TGTGATTGCACTTGACCTGCATGCGCCGCAAATTCAAGGATTCTTTGATAT	-9.8	10.92	prs_CDS
59231	+	12.31	AAAAGCCATTCCGCAAACGATTGAGGCTGATATTTCAAGCCTCGATGTAAA	-15.6	0	ctc_CDS
59439	+	1053.94	GAACAATAATAGCTTAAGGCGTAACCCTCCCGCGGTTACGTCTTTTGTGCT	-16.9	36.36	ctc+42
60398	+	104.56	ATTTATTCAATAAAAAGCTTTGGTGTAGACACTAGACCAAAGCGTTTTTCT	-15.5	2.58	yabK+38
61081	+	12.13	TGGATTCAATCCGCAGCTTTAATTCAGATGATCAGCGGTCAATTGAGACCC	-9	0	mfd_CDS
64207	+	13.25	AAGAAATTCGAAGAACTCTGAGAATCAGGGAAGGCGATCCGCTTGAGATTT	-10.2	0	spoVT_CDS
64703	+	47.44	GAAAATAGGTATGTAAAGAACAGCTCTCCTTGGGACGCTGTTCTTTTTCAT	-16.6	9.14	spoVT+68
68214	+	23.38	CATACAATGCAGTAATAATGCTAAAAGTATCGAGGATATGGGGGCTGAATA	-5.2	0	yabO+77
68643	+	11.69	TACCGGCTCTTTGTCATTCGTGCCAAAACAGCCAGATGGCTATTATTTATT	-8.6	3.4	yabQ_CDS
70027	+	74.75	TCAAAACGTGGAGGGCGCGGAGCAAGAAGAGGATAACTTGCTGCTTTCTAT	-14.4	5.06	yabR+15
70070	+	2588.75	CTTTCTATAAAATAAATGAAGCATCCGTTCATCCCGACGGATGCTTTTTTA	-17.2	80.05	yabR+58
70257	+	4235.38	GTACGGTTCATACCCGTGAGGTCGGGGGTTCGATCCCCTCCGCCGCTACCA	-18.2	5.8	yabR+245
70339	+	499.63	GACACCGCCCTTTCACGGCGGTAACACGGGTTCGAATCCCGTACGGGTCAT	-17.2	27.64	yabR+327
70380	+	1543.19	TACGGGTCATCCTAACAAATCGGTTTCTCTTGCAGAAGCCGATTTTTTTCA	-17.1	78.67	yabR+368
74065	+	33.81	CTTGAAATCTTTCTCAAAGGCCCAGTCCGTTACGATGGGGCCTTCTTTTTT	-15.7	15.05	yabT_CDS
75369	+	13.06	GTTGAAACAATGCTTATGAAACTGGCTAAGGGTACGCTTGGAACGGGACTT	-6.9	0.76	tilS_CDS
75992	+	13.5	ATACCAAATTAGCGGAGCTGCTGATGAAACGGCAGTGCTCCCTAATGGATA	-19.1	0	tilS_CDS
76163	+	15	GATCAAACTAAAAGGGATGAACGGCTCAAAAAAGGTAAAGGATATATTTAT	-1.7	0	tilS_CDS
76923	+	30.88	TTTATGAAAGCTGATCGGCAGCCTGCTTCCGAGATGGTTATTGTTTGTATT	-7.3	1.21	hprT+37
77087	+	17.94	AATCGGGGTTGTGAGCTACTTCCAGACCTCAAATCCGAAAACAGAAAATAT	-8.4	0	ftsH_CDS
77201	+	17.25	TGTCAGAGGTGTTTATGAGGTAAAAGGGCAGCTGAAAAACTACGACAAAGA	-6.4	7.27	ftsH_CDS
77259	+	11.56	TTTTTGACTCATGTTCCTGAAGGAAAGGGAGCAGACCAGATATTTAACGCT	-10.4	5.29	ftsH_CDS
77341	+	19.75	CGCAAGAAACAAGCGGATGGGTGACGTTCCTGACGACCATCATCCCATTTG	-12	0	ftsH_CDS
77435	+	15.38	AGGCGGCGGCAGCCGTGTCATGAACTTTGGCAAGAGTAAAGCGAAGCTGTA	-11.9	0	ftsH_CDS
77501	+	46.69	ACGCGTCAAATTTAAAGACGTTGCAGGGGCTGACGAAGAAAAGCAAGAACT	-7.2	0	ftsH_CDS
77666	+	22.19	CAAGGCTTGTGCAGGAGAAGCCGGCGTACCTTTCTTCAGCATCAGCGGATC	-15.6	8.48	ftsH_CDS
77726	+	39.75	TGAAATGTTTGTAGGGGTCGGTGCTTCCCGTGTGCGTGACTTGTTTGAAAA	-9.6	6.83	ftsH_CDS
77767	+	17.56	TGTTTGAAAATGCGAAAAAGAATGCGCCTTGTTTGATCTTCATTGATGAAA	-5.3	0	ftsH_CDS
77978	+	66.75	CTTACTTCGTCCGGGACGTTTTGACCGTCAAATCACAGTGGACCGCCCAGA	-8.3	9.65	ftsH_CDS
78054	+	12.69	AAAGTCCATGCGAGAAACAAACCGCTGGATGAAACGGTTAACCTAAAATCA	-8.7	2.3	ftsH_CDS
78108	+	10.81	GCCATGAGAACACCAGGCTTCTCAGGCGCTGACTTAGAAAACCTCTTGAAT	-11.3	0	ftsH_CDS
78141	+	30.81	TTAGAAAACCTCTTGAATGAAGCTGCGCTTGTAGCGGCTCGTCAAAACAAG	-13	0	ftsH_CDS
78226	+	17.69	CGGACCGTGTAATTGCCGGACCCGCTAAGAAGAGCCGCGTTATCTCCAAGA	-8.8	6.03	ftsH_CDS
78285	+	11.69	AATATCGTGGCTTATCACGAAGGCGGACACACCGTTATCGGTCTCGTTTTA	-13	0	ftsH_CDS
78345	+	14.81	GATATGGTTCATAAAGTAACGATTGTTCCTCGGGGCCAGGCTGGCGGTTAT	-7.4	0	ftsH_CDS
78477	+	24.5	CGTGTTGCTGAAGAGATTATCTTCGGTGAAGTCAGCACAGGGGCGCACAAT	-13.6	0	ftsH_CDS
78642	+	13.06	CGTGATTTCAACAACGAACAGAACTACAGTGATCAAATCGCTTACGAAATT	-4.9	0	ftsH_CDS
78671	+	62.19	TGATCAAATCGCTTACGAAATTGATCAGGAAATTCAGCGCATCATCAAAGA	-7.9	0	ftsH_CDS
78895	+	26.25	AAGTAAACATTCTGACAAAAACAGAAGAAAAGAAAGACGATACGAAAGAGT	-2.9	13.83	ftsH_CDS
78916	+	15.06	CAGAAGAAAAGAAAGACGATACGAAAGAGTAATTCGCTTTCTTTCTAAAAA	-13.2	7.28	ftsH+19
78947	+	1293.88	ATTCGCTTTCTTTCTAAAAAAACTGCCGGCTGACGCTGGCAGTTTTTTTAT	-22.8	75.55	ftsH+50
80775	+	293.56	GGAAGGGCTTCGTGACCAAACTACCCGCTAAGCTCTTTAGCGGGTTTTTAA	-15.5	30.92	hslO+20
82702	+	17.44	TAACGGCGAACGTTATCTAAGCACGCCGCTGTACCAATTCGATTAAAAAAA	-8.2	50.18	cysK+5
82735	+	1072.88	CCAATTCGATTAAAAAAAGCCAAAACTCCCGGTTCGCCGGGAGTTTTTTTA	-17.3	94.26	cysK+38
84936	+	28.81	AACGGCCGGTATATGGAGGAGAAAGATGCAGTTCTTTCTCCTTTTGACCAT	-20.2	5.08	pabC_CDS
86123	+	16.94	GCAGATGAAGCAGTGAAAGCCGGTGCATCCATTATCAATGATATTTGGGGA	-9.9	3.41	sul_CDS
86698	+	74.63	AAAACAAACTTGGCCAGCGGTTTAAAGTCGATTTAACCGCTGAGCTGGATT	-17.5	0	folB_CDS
86870	+	14.31	TATTGCTGGCACTGTTCTCGGAAAATTTCAGCCTGTTCAGCAATGTACGGT	-11.1	0	folB_CDS
87570	+	84.06	CGGAAACCGATTGCCGTCTGCTGCCATCATTCAAGATGCAGCAGATGTTTT	-22	0	yazB_CDS
88688	+	34.63	CTCACCTCTATTTGCTGCTCACTGCTAGTTTTACGCTGGCAGTTTTTCTGC	-12	0	dusB+53
89784	+	10.69	TTTCTGGGAAGAGGTTACTGTTGAGCAGGCGCGTGAATATGCAAAAGAACA	-8.5	3.2	lysS_CDS
90019	+	13	GGCCGTGAACATGCCAACGCGTTTACAGAGCTGAATGATCCTATTGATCAA	-10.8	0	lysS_CDS
90211	+	1133	ATGCTGCTGACGAATGCCCCTTCTATTCGCGATGTGCTGTTATTCCCGCAA	-5.4	14.78	lysS_CDS
90239	+	26.56	GCGATGTGCTGTTATTCCCGCAAATGAGACAACGCTAATAAAAAAGAGCGG	-5.6	54.74	lysS+13
90241	+	26	GATGTGCTGTTATTCCCGCAAATGAGACAACGCTAATAAAAAAGAGCGGTA	-4.8	59.37	lysS+15
90248	+	23.44	TGTTATTCCCGCAAATGAGACAACGCTAATAAAAAAGAGCGGTATCCTCCA	-5.4	43.23	lysS+22
90275	+	361.31	AATAAAAAAGAGCGGTATCCTCCATAGGGAAAGGATGCCGCTCTTTTTAAA	-28.3	94.74	lysS+49
90460	+	161.06	GTTATAATAATAAAGTCGCTTGAACGAAGTGAACAAAATGATCTTTGAAAA	-6.9	51.08	lysS+234
92155	+	79.69	ATATAAGACCTTGGGTCTTATAAACAGAACGTTCCCTGTCTTGTTTAGTTT	-13.6	25	lysS+1929
92256	+	16.88	ACATCACATTCAAGTAATACAAGATATCACATAGTGATTCTTTTTAACGGT	-5	75	lysS+2030
95179	+	17.81	AGTGTGGCGACACATGGAGCTGACAGATACTAATCGATCGAGGACTTAACC	-8.8	100	lysS+4953
95448	+	627.75	GCATCTGCCTTACAAGCAGAGGGTCGGCGGTTCGAGCCCGTCATCCTCCAC	-16.1	0	lysS+5222
95531	+	2120.56	ACTGACTTGTAATCAGTAGGTTGGGGGTTCAAGTCCTCTTGCCGGCACCAC	-14.9	0	lysS+5305
95644	+	1604.94	CTGACTTTTAATCAGAGGGTCGAAGGTTCGAGTCCTTCATGGCTCACCATT	-13.6	3.75	lysS+5418
95732	+	1131.38	TTAGGATCTAGTGTCTTTATGACGTGGGGGTTCAAGTCCCTTCACCCGCAT	-11.5	0	lysS+5506
95847	+	2176.38	CCACCTTGCCAAGGTGGGGGTCGCGGGTTCGAATCCCGTCTTCCGCTCCAA	-20.1	3.09	lysS+5621
95947	+	857.69	AAATCCTGCGGTAGGTGACTACCGTGCCGGTTCAAGTCCGGCCCTCGGCAT	-19.8	10.8	lysS+5721
96033	+	289.75	TTTGACTACGGATCAAAAGGTTAGGGGTTCGACTCCTCTCGGGCGCGCCAT	-9.9	1.29	lysS+5807
96134	+	46.63	GCACATGGTTTGGGACCATGGGGTCGCAGGTTCGAATCCTGTCTTCCCGAC	-18.7	0	lysS+5908
96222	+	1832.06	CCTGCTTTGCACGCAGGAGGTCAGCGGTTCGATCCCGCTAGGCTCCACCAA	-19.3	14.66	lysS+5996
96316	+	390.06	TACTAATAAAGTTGCTTTAACAAAGCGGACAAACAAAATGATCTTTGAAAA	-4.7	36.6	lysS+6090
96340	+	38.75	GCGGACAAACAAAATGATCTTTGAAAACTAAACAAGACAAAACGTACCTGT	-0.3	52.16	lysS+6114
96392	+	24.88	AATTCAGTTTTTAAAAATCGCACAGCGATGTGCGTAGTCAGTCAAACTACT	-10.4	43.48	lysS+6166
98011	+	82.5	ATATAAGACCTTGGGTCTTATAAACAGAACGTTCCCTGTCTTGTTTAGTTT	-13.6	40	lysS+7785
98111	+	17	GACATCACATTCAAGTAATACAAGATATCACATAGTGATTCTTTTTAACGG	-5	20	lysS+7885
101035	+	25.31	AGTGTGGCGACACATGGAGCTGACAGATACTAATCGATCGAGGACTTAACC	-8.8	100	lysS+10809
101092	-	10	TCCGTGTTCGGTATGGGAACGGGTGTGACCTCTTCGCTATCGCCACCAAAC	-11.5	100	gerD+57423
106058	+	181.25	AGAAGACGGAAATGAGGCATACAGCATGTAAGTGTATGCCTCACTTTCATA	-20.3	10.44	clpC+54
106920	+	15.25	GGATCTACAAACGAAATGGGCATTTTCGAAATGCGGGAAGAGGGGCTCACT	-7.4	15.84	radA_CDS
110285	+	117.38	GATTGAACGTTCAAGCTTGTGGGCTGTCCAAACGCCACAAGCTTTTCGTCT	-16.5	2.69	ispD_CDS
111669	+	23.25	CGGAACGCCTACTTATAACTTCGCGGTAGCTATTGATGACTACTTAATGAA	-3.8	5.72	gltX_CDS
112594	+	11.81	CAGAAAGGATCTTCATTGGCTGAGAGAGATCCATGAGCCGGGTTTTAGAAG	-8.8	6.51	gltX+96
112759	+	857.44	CGCGCGGTTAAAGCGTCTCTGTCATGTTTACATGCAGAGACGCTTTTTTTA	-23.4	51.03	gltX+261
114967	+	42.88	GGTGATGCCATTTTTGAAGTGTATGTCAGGCATCACCTGCTTAAGCAGGGC	-17.7	0	mrnC_CDS
116082	+	10.44	TCCTGTTAGTAGACGGGTACAACATGATTGGAGCCTGGCCGCAGCTGAAGG	-10.7	0	yacP_CDS
116252	+	48.31	CTTGAGAAAAAACAGACCAACCATAGAGTTGAAGTAATTTTTACAAAAGAA	-2.8	0	yacP_CDS
117500	+	16.25	ATACTGCAGTACTTGCAATTCACATACAGCTCATCTTGAAACAAAATAGTT	-3.3	2.66	rpmG+2
117619	+	12.88	AAATGAAAAAGGTAAGCTGGCCTAAAGGAAAAGAGTTAACGCGTTATACCA	-5.2	0	secE_CDS
117779	+	365.38	TATAATAGATCATAATATTACTTGCCAAAACCCGTTCAGCGGGTTTTTTAT	-11	0	secE+68
118418	+	16.88	TGTTTGGCCGTGAAACGCCGGTTGAGCTGGAATTTACCCAAATCGATAAAT	-12.2	3.82	nusG_CDS
118576	+	110.81	GAATGAAACCTTGAGTGGGAGGGTTTACCCTATTACCACATCACGGACTTA	-13.3	3.8	nusG+153
118613	+	72.38	ACATCACGGACTTAAGGAGGTGTGTCTCGTGGCTAAAAAAGTAGTTAAAGT	-8.5	0	rplK_CDS
118670	+	44.06	ATTGCAAATTCCTGCTGGAAAAGCTAACCCAGCACCACCAGTTGGACCTGC	-13.9	0	rplK_CDS
118696	+	68.63	ACCCAGCACCACCAGTTGGACCTGCACTTGGTCAAGCCGGTGTTAACATCA	-14	21.49	rplK_CDS
118752	+	78.56	TTCTGTAAGGAGTTTAACGCTCGTACAGCTGACCAAGCTGGTTTAATCATT	-10.7	0.12	rplK_CDS
118794	+	14.94	TTAATCATTCCTGTTGAAATTTCGGTTTACGAAGACCGTTCATTTACATTT	-6.7	0	rplK_CDS
118825	+	30.13	AAGACCGTTCATTTACATTTATTACAAAAACTCCACCTGCTGCAGTATTGC	-0.4	0	rplK_CDS
119018	+	58.69	CATGGTTGAAGGTACTGCCCGCAGTATGGGTATTGTAATCGAGGATTAATT	-9.4	0	rplK+2
119066	+	397.94	ATTTGTTTCTTGTCGGGTTGCGAGTTTTAACAAGTTCGCAACCCTTATTCG	-16.7	2.95	rplK+50
119105	+	212.56	AACCCTTATTCGTGGGAGGTTATTCCGCTATAACCACATAAGGAGGAAATT	-11.2	6.86	rplK+89
119140	+	12.06	ACATAAGGAGGAAATTTTAAAATGGCTAAAAAAGGTAAAAAGTACGTTGAA	-1	0	rplA_CDS
119165	+	26.81	CTAAAAAAGGTAAAAAGTACGTTGAAGCTGCTAAGCTTGTAGACCGTTCTA	-7.7	0	rplA_CDS
119296	+	36.38	TTCCGTTTAGGGGTTGACCCTCGTAAAAACGACCAGCAAATCCGTGGAGCA	-10.8	3.24	rplA_CDS
119317	+	25.63	CGTAAAAACGACCAGCAAATCCGTGGAGCAGTTGTGCTTCCAAACGGAACT	-13.4	0	rplA_CDS
119403	+	23.56	CGAAAAAGCGAAAGAAGCTGAAGCTGCTGGTGCAGATTTCGTAGGCGATAC	-10.2	8.37	rplA_CDS
119423	+	34.44	AAGCTGCTGGTGCAGATTTCGTAGGCGATACTGACTACATCAACAAAATTC	-9.1	6.48	rplA_CDS
119468	+	32.19	AAATTCAACAAGGCTGGTTCGATTTCGATGTTATCGTAGCTACACCTGACA	-8.2	2.29	rplA_CDS
119576	+	19.19	ACCCTAAAACTGGTACAGTTACTTTCGAAGTTGAAAAAGCTATCGGCGAAA	-7	0	rplA_CDS
119621	+	54.38	GCGAAATCAAAGCTGGTAAAGTTGAATACCGCGTTGATAAAGCTGGAAACA	-11.8	0	rplA_CDS
119664	+	30.38	TGGAAACATTCATGTTCCTATCGGTAAAGTTTCTTTCGAGGATGAAAAACT	-4.9	0	rplA_CDS
119763	+	89.88	TGCTGCAGCTAAAGGCGTTTACGTGAAAAACGTTGCTGTAACTTCTACTAT	-11.4	11.83	rplA_CDS
119808	+	70.38	TACTATGGGACCTGGTGTCAAAGTAGACTCTTCAACTTTTAACGTAAAATA	-5.1	0.92	rplA_CDS
119946	+	61.63	GCTTAATTATCCTACCGAGGTGTATATTATCACAGCTATTACGTTACGTAT	-3.2	0	rplA+137
119987	+	5458.94	CGTTACGTATGCTTGTATATACAGCCTCCATGTCTCATGGAGGCTTTTTAT	-18.4	2.4	rplA+178
120087	+	180.94	CAAGAATCTACAGGAGGTGTAACCATGAGCAGCGCAATTGAAACAAAAAAA	-2.4	0	rplJ_CDS
120115	+	34.69	GCAGCGCAATTGAAACAAAAAAAGTTGTTGTTGAAGAAATTGCTTCTAAAC	-8.8	0	rplJ_CDS
120149	+	17.56	AGAAATTGCTTCTAAACTGAAAGAAAGTAAATCAACGATCATCGTTGACTA	-12.2	0	rplJ_CDS
120155	+	17.44	TGCTTCTAAACTGAAAGAAAGTAAATCAACGATCATCGTTGACTATCGCGG	-9.7	15.66	rplJ_CDS
120269	+	41.69	AGTTTACAAAAATACGATGACTCGCCGTGCGGTTGAACAAGCTGAGCTTAA	-5.9	4.16	rplJ_CDS
120316	+	95.19	TTAATGGTTTGAATGATTTCTTAACTGGACCGAACGCGATCGCATTCAGCA	-5.7	10.39	rplJ_CDS
120362	+	11.19	CAGCACTGAAGATGTTGTCGCTCCGGCTAAAGTTCTTAATGACTTCGCTAA	-5.9	0	rplJ_CDS
120473	+	56.31	AGAAGTGAAAGCTCTTGCTGAACTTCCATCACGCGAAGGCTTGCTTTCTAT	-13.1	0	rplJ_CDS
120524	+	146.19	GTTGCTTAGCGTACTTCAAGCTCCAGTTCGCAACCTTGCTCTTGCTGCAAA	-9.3	0	rplJ_CDS
120582	+	81.5	GCAGAACAAAAGGAAGAACAAGGCGCTTAATCTAATCAGTTTTTCATAAAT	-4.3	0	rplJ+21
120664	+	12.75	TAAATATCGAAGAAATCATTGCTTCCGTTAAAGAAGCAACTGTACTTGAAT	-7.7	11.76	rplL_CDS
120738	+	40.88	GAAGAAGAATTTGGCGTAACTGCTGCTGCTCCTGTAGCTGTAGCTGGCGGA	-14.8	0	rplL_CDS
120816	+	42.5	CAAAGCGAATTCGATCTTATCCTTGCTGGTGCAGGATCTCAAAAAATCAAA	-7.5	0.14	rplL_CDS
121030	+	17060.6	CTTCACTTACCTGTAGGGGAAGCTCGCTTTTATGAGGCGAGCTTTTTCTTT	-20.7	72.91	rplL+52
121331	+	10.88	ATTGGTTTATCGCTCGCCAGCGACTTTAAAGACCGGACCATCCACATGATT	-7.9	0	ybxB_CDS
121663	+	14.25	TGAAGTTTCCGTCGTTCAAAAAAAGAAAGGCTATTATATCATAAAAGCAAA	-3.3	22.26	ybxB_CDS
121689	+	16.38	AAGGCTATTATATCATAAAAGCAAAAAAAGTTTGACTCGGTATTTTAACTA	-4	1.95	ybxB+16
121969	+	20.13	TTGACAGGTCAACTAGTTCAGTATGGACGACACCGCCAGCGCAGAAGCTAT	-9.7	6.15	rpoB_CDS
122006	+	11.06	AGCGCAGAAGCTATGCTCGCATTAGCGAAGTGTTAGAATTACCAAATCTCA	-9.7	0	rpoB_CDS
122011	+	10.06	AGAAGCTATGCTCGCATTAGCGAAGTGTTAGAATTACCAAATCTCATTGAA	-7.7	0	rpoB_CDS
122216	+	27.06	AACGTGATGTGACTTACTCAGCTCCGCTAAGAGTGAAGGTTCGTTTAATTA	-8.2	0	rpoB_CDS
122459	+	24.5	CAAACCGTGGCGCATGGTTAGAATACGAAACTGATGCGAAAGATGTTGTTT	-8	0	rpoB_CDS
122509	+	300	TATGTCCGCATTGATCGCACACGTAAGTTGCCGGTTACGGTTCTTTTGCGT	-11.7	0	rpoB_CDS
122612	+	13.13	AATACCTGCGAAATACGCTTGATAAAGATAACACAGAAAACAGCGACAAAG	-2.4	2.15	rpoB_CDS
122622	+	11.81	AAATACGCTTGATAAAGATAACACAGAAAACAGCGACAAAGCGTTGCTGGA	-10.1	0	rpoB_CDS
122865	+	14.19	AGGAGAAATCCTTGCTGAAAAAGGCCAGATTCTTGATAGAAGAACGCTTGA	-9.1	0	rpoB_CDS
123171	+	270.44	CGATCATCTTGGAAACCGCCGTTTACGTTCTGTAGGCGAGCTTCTCCAGAA	-14	5.1	rpoB_CDS
123235	+	19.5	GGTTTAAGCCGTATGGAGCGTGTGGTTCGTGAGAGAATGTCAATTCAAGAT	-8	4.86	rpoB_CDS
123241	+	18.75	AGCCGTATGGAGCGTGTGGTTCGTGAGAGAATGTCAATTCAAGATACGAAT	-10.6	0	rpoB_CDS
123286	+	24.56	ACGAATACAATTACGCCTCAGCAGCTGATCAATATTCGTCCTGTTATTGCG	-6.9	35.58	rpoB_CDS
123356	+	15.38	GAAGCTCACAGCTTTCTCAATTCATGGATCAGACGAACCCGCTTGCTGAAT	-8.6	0	rpoB_CDS
123433	+	16.63	TTAGGACCGGGCGGATTGACACGTGAGCGTGCCGGAATGGAAGTGCGTGAC	-9.3	2.24	rpoB_CDS
123577	+	19.5	GTAAACCGTTTTGGCTTTATTGAAACGCCATATCGCCGCGTTGACCCTGAA	-5.9	0	rpoB_CDS
123629	+	33.44	CAGGGAAGGTAACGGGCAGAATCGATTACTTAACTGCTGATGAAGAGGATA	-8.4	0	rpoB_CDS
123946	+	20.31	ACTGGTATGGAATACGTATCAGGAAAAGACTCTGGTGCCGCTGTTATTTGT	-10.5	0.73	rpoB_CDS
124052	+	27.56	ATGAAGAAGTAGACGGTCAAAAAGTAAAAGGAAACCTGGATAAATACAGCC	-2.3	0.94	rpoB_CDS
124229	+	55.44	CACTTGGCCGTAACGTAATGGTCGGCTTCATGACGTGGGATGGCTACAACT	-14.3	0	rpoB_CDS
124380	+	19.75	TGGACCTGAAGAAATCACTCGCGATATTCCAAACGTCGGTGAAGATGCGCT	-6.7	0.25	rpoB_CDS
124435	+	35.69	AATCTTGATGACCGCGGAATCATCCGTATTGGGGCAGAAGTAAAAGACGGA	-7.8	36.03	rpoB_CDS
124580	+	30.63	AGGTTCGTGATACTTCTCTTCGTGTGCCTCATGGCGGCGGCGGAATTATCC	-13.2	6.55	rpoB_CDS
124598	+	16	TTCGTGTGCCTCATGGCGGCGGCGGAATTATCCATGACGTTAAAGTCTTCA	-14	0	rpoB_CDS
124641	+	22.94	AGTCTTCAACCGTGAAGACGGAGACGAACTTCCTCCAGGTGTTAACCAGTT	-15.2	9.71	rpoB_CDS
124807	+	34.69	CTTCCTGACGGCACACCAATTGATATCATGCTTAACCCGCTGGGCGTACCA	-5.7	0	rpoB_CDS
124960	+	11.31	GAGGATGTCTGGGAAACACTTGAAGAAGCCGGCATGTCTCGTGACGCCAAA	-10	0	rpoB_CDS
125055	+	31.13	TGTATCTGTCGGTATCATGTACATGATCAAACTGGCTCACATGGTTGACGA	-8.1	0	rpoB_CDS
125116	+	20.44	GCACGCTCTACAGGCCCTTACTCACTTGTTACGCAGCAGCCTCTTGGCGGT	-11.3	0	rpoB_CDS
125308	+	46.75	GTTAAAGGCGACAATGTTCCTGAACCAGGTGTTCCGGAATCATTCAAAGTA	-9.9	0	rpoB_CDS
125336	+	13.75	GTGTTCCGGAATCATTCAAAGTATTAATCAAAGAACTTCAAAGCTTAGGTA	-0.2	0	rpoB_CDS
125377	+	28.38	AGCTTAGGTATGGATGTCAAAATCCTTTCTGGTGATGAAGAAGAAATAGAA	-7.2	0.81	rpoB_CDS
125492	+	29.69	AAGAGCCGGAAGAAACAGCATCTGCAGACGTTGAACGCGATGTAGTAACAA	-6.3	2.02	rpoB_CDS
125580	+	15.06	TTAATCCGAAGATAAAAAGGGAGGTAGGCCCCTTGCTAGATGTGAACAATT	-6.3	9.63	rpoC_CDS
125620	+	28.81	TGTGAACAATTTTGAGTATATGAACATCGGTCTTGCTTCACCAGATAAAAT	-6.8	0	rpoC_CDS
125677	+	22.63	ATGGTCTTTTGGTGAAGTGAAAAAGCCTGAAACGATAAACTATCGTACGTT	-7.9	0	rpoC_CDS
125705	+	10.31	GAAACGATAAACTATCGTACGTTAAAACCTGAAAAGGACGGTCTATTCTGC	-8.3	0.16	rpoC_CDS
125844	+	56.63	GCGGAGTCGAAGTAACACGGGCTAAAGTCCGTCGTGAGAGAATGGGGCACA	-11	16.31	rpoC_CDS
125873	+	1377.75	CGTCGTGAGAGAATGGGGCACATTGAACTGGCTGCCCCAGTTTCCCACATT	-19.3	0	rpoC_CDS
125996	+	11.06	ATTTACTTTGCTTCTTACGTTGTAACTGATCCGGCGAATACACCGCTTGAA	-5.1	11.48	rpoC_CDS
126237	+	18.44	GTCTTGAAGTTTTAGAAGCCTTCCGTAACTCAGGAAACAAGCCTTCTTGGA	-8.6	0	rpoC_CDS
126313	+	28.44	TCCTCCGGAGCTTAGACCGATGGTTCAGCTAGATGGCGGACGTTTTGCGAC	-12.7	0	rpoC_CDS
126384	+	21.63	ATCGTCGTGTCATCAACCGTAACAATCGTTTGAAACGCCTTTTGGACCTTG	-5.9	1.89	rpoC_CDS
126413	+	21.81	TTGAAACGCCTTTTGGACCTTGGTGCGCCTAGCATCATCGTTCAAAACGAA	-16	0	rpoC_CDS
126559	+	13	TTCTCACATGCTGAAAGGGAAGCAAGGCCGTTTCCGTCAAAACCTTCTTGG	-8.1	0	rpoC_CDS
126659	+	22.94	TTGAAAATGTACCAATGCGGATTACCGAAGGAAATGGCACTTGAACTTTTC	-5.2	0	rpoC_CDS
126671	+	19.81	CAATGCGGATTACCGAAGGAAATGGCACTTGAACTTTTCAAACCTTTCGTT	-8.8	0	rpoC_CDS
126861	+	26.88	CACTTCACAGATTAGGTATCCAGGCGTTTGAACCAACGCTTGTTGAAGGAC	-12.2	10.97	rpoC_CDS
126897	+	38.38	CGCTTGTTGAAGGACGCGCAATCCGTCTTCACCCGCTCGTATGTACAGCTT	-8.1	0	rpoC_CDS
127139	+	11.81	GTCGGTGAAGGTATGGTCTTCAAGAATACAGACGAAGCGCTTCTTGCTTAT	-8.7	4.19	rpoC_CDS
127335	+	13	TCCCTTACATGAATGAACCAACGAAGAGCAACATTGAAGAGAAAACACCTG	-0.1	2.77	rpoC_CDS
127349	+	20.5	GAACCAACGAAGAGCAACATTGAAGAGAAAACACCTGACCGTTTCTTCTTA	-4.7	0	rpoC_CDS
127353	+	22.25	CAACGAAGAGCAACATTGAAGAGAAAACACCTGACCGTTTCTTCTTAGAAA	-4.7	4.1	rpoC_CDS
127407	+	40.69	GTGCTGATGTTAAAGCTGTTATCGCACAGCAGCCAATCAATGCGCCGTTTA	-12	2.32	rpoC_CDS
127457	+	23.13	AAAAAAGGCATTCTGGGTAAAATCATCGCGGAAATCTTTAAACGATTCCAT	-6.8	0	rpoC_CDS
127644	+	16.88	GCAAAGTTGACAACGTTATGAAGCAATTCCGCCGCGGTCTTATCACTGAAG	-5.1	0	rpoC_CDS
127716	+	18.63	TCTCTATCTGGAGTGCTGCAAAAGACGTTATCCAAGGCAAACTGATGAAAT	-4.6	0	rpoC_CDS
127738	+	28.31	AGACGTTATCCAAGGCAAACTGATGAAATCACTTGATGAACTCAACCCGAT	-5.3	12.69	rpoC_CDS
127777	+	10	ACTCAACCCGATCTACATGATGAGTGACTCTGGTGCCCGTGGTAACGCATC	-7.7	2.02	rpoC_CDS
127818	+	20	GTAACGCATCTAACTTTACGCAGCTTGCCGGAATGCGCGGCCTGATGGCCA	-13.8	0	rpoC_CDS
128097	+	19.69	TTAAAGAAGGAACTGAAACAATTGAGCGCTTAGAAGAACGCTTAATCGGAC	-8.1	11.55	rpoC_CDS
128257	+	12.25	AGAAGTGTGGATCCGTTCTGCCTTCACATGTAATACGCCTCATGGTGTATG	-17.7	0	rpoC_CDS
128407	+	26.63	ACAGTTAACAATGCGTACATTCCATACAGGCGGGGTTGCCGGAGACGATAT	-7	6.85	rpoC_CDS
128621	+	11	GCACCTTACAACTCCCGCCTGAAAGTAGCGGAAGGAGATAAAATTACTCGA	-7.8	29.86	rpoC_CDS
128651	+	11	GAAGGAGATAAAATTACTCGAGGCCAAGTACTGACAGAAGGTTCAATCGAT	-4.2	0	rpoC_CDS
128829	+	11.69	AGATGCTTCGCAAAGTACGCGTGATTGATGCCGGTGACACTGATGTGCTTC	-9.2	3.29	rpoC_CDS
128856	+	17.19	ATGCCGGTGACACTGATGTGCTTCCAGGTACATTGCTTGATATTCACCAAT	-12.6	4	rpoC_CDS
128930	+	15.44	TTGCTTGAAGGCAACCGACCAGCTACAGGCCGTCCTGTCTTACTCGGTATT	-13.9	4.33	rpoC_CDS
129118	+	39.75	GCTTGTTCCAGCAGGTACAGGAATGATGAAATACCGTAAAGTAAAACCAGT	-6.3	8.75	rpoC_CDS
129158	+	477.94	GTAAAACCAGTATCAAATGTTCAGCCGACTGACGATATGGTCCCGGTTGAA	-13.4	99.78	rpoC_CDS
129583	+	114.88	TCGGCAAAGCCTGCGGAATTGAGGTAGGAGCAGCCGCTGTTGCCATTATTT	-15.6	0	ybxF_CDS
129596	+	96.13	CGGAATTGAGGTAGGAGCAGCCGCTGTTGCCATTATTTTATAACGTACTTT	-11.7	5.43	ybxF+8
129621	+	69.19	GTTGCCATTATTTTATAACGTACTTTTGTTTTTGCGTAAGATTCCATCTTG	-3.7	0	ybxF+33
129640	+	218.75	GTACTTTTGTTTTTGCGTAAGATTCCATCTTGTGTAAAGACATTGTTTTTT	-13.5	0	ybxF+52
129735	+	17.69	GAAGGGAGGAAAAATTCATGCCTACAATTAATCAGCTAATTCGCAAAGGAC	-4.2	0	rpsL_CDS
129738	+	17.19	GGGAGGAAAAATTCATGCCTACAATTAATCAGCTAATTCGCAAAGGACGCG	-4.2	0	rpsL_CDS
129745	+	16.81	AAAATTCATGCCTACAATTAATCAGCTAATTCGCAAAGGACGCGTGAGTAA	-6.6	0	rpsL_CDS
129840	+	22.56	GCTTTAAAAAAGAGCACACTAACGTATCTTCTCCACAAAAACGCGGGGTAT	-6.5	0	rpsL_CDS
129858	+	46.25	CTAACGTATCTTCTCCACAAAAACGCGGGGTATGTACTCGTGTTGGTACAA	-12.1	0	rpsL_CDS
129888	+	79.19	TATGTACTCGTGTTGGTACAATGACACCGAAAAAACCGAACTCAGCACTTC	-6.2	12.03	rpsL_CDS
130035	+	22.81	TCCGCGGCGGACGTGTAAAAGACTTACCAGGGGTACGTTACCACATCGTTC	-10	0	rpsL_CDS
130075	+	25.25	CCACATCGTTCGTGGTGCGCTTGATACTGCTGGAGTTGAAAACCGTGCACA	-10.2	5.52	rpsL_CDS
130114	+	94.06	AAACCGTGCACAAGGCCGTTCTAAATACGGTACGAAAAAACCTAAAGCAAA	-6.4	6.83	rpsL_CDS
130190	+	29.81	GATGAAGGGAGGATATTCAGATGCCACGTAAAGGTCCTGTAGCAAAAAGAG	-3.8	0	rpsG_CDS
130217	+	40.19	GTAAAGGTCCTGTAGCAAAAAGAGATGTTTTACCTGATCCGATTTACAACT	-6.3	0	rpsG_CDS
130495	+	72.06	CGTACGACTCTTGGACTTCGCTGGTTAGTTAACTACGCTCGTCTTCGTGGA	-10	0	rpsG_CDS
130604	+	39.75	GTGCTGCTGTTAAGAAACGTGAAGACACTCATAAGATGGCTGAAGCAAACA	-7.8	1.71	rpsG_CDS
130646	+	42.94	AAGCAAACAAAGCATTTGCTCACTATCGCTGGTAGGATTTATAGATTAACA	-6.2	8.71	rpsG+16
130710	+	17.19	TAATAAGGAAGGAGAAATTACCCAATGGCAAGAGAGTTCTCCTTAGAAAAA	-8.2	2.13	fusA_CDS
130760	+	65.69	AACTCGTAATATCGGTATCATGGCTCACATCGATGCCGGTAAAACGACTAC	-19.6	3.74	fusA_CDS
130790	+	26.44	CGATGCCGGTAAAACGACTACTACAGAACGTATCTTGTTCTATACTGGTCG	-12.4	0	fusA_CDS
130792	+	26.44	ATGCCGGTAAAACGACTACTACAGAACGTATCTTGTTCTATACTGGTCGTA	-14.6	0	fusA_CDS
130815	+	46.38	GAACGTATCTTGTTCTATACTGGTCGTATCCACAAAATTGGTGAAACTCAT	-6.6	0	fusA_CDS
130870	+	18.44	GAGCTTCACAAATGGACTGGATGGAGCAGGAACAAGAACGTGGTATCACAA	-7.3	0.67	fusA_CDS
130950	+	72.5	AAAGGATACCGCGTAAACATCATCGATACTCCAGGACACGTAGACTTCACA	-3.5	0	fusA_CDS
131034	+	13.75	GGTGCTGTTGCTGTACTTGACGCGCAATCAGGCGTTGAGCCTCAAACAGAA	-15	0	fusA_CDS
131089	+	99.06	TTTGGCGTCAGGCAACAACTTATGGAGTACCGCGTATCGTTTTTGTTAACA	-6.3	3.7	fusA_CDS
131139	+	19.75	AAAATGGACAAAATCGGTGCAGACTTCCTTTACTCTGTAGGAACTTTAAGA	-4.9	12.54	fusA_CDS
131166	+	16.13	CTTTACTCTGTAGGAACTTTAAGAGACCGTCTTCAAGCAAACGCTCATGCA	-4.9	0	fusA_CDS
131225	+	18.56	GCCGATCGGTGCTGAAGATAACTTCGAAGGTATCATTGACCTTGTAGAAAA	-9.3	5.29	fusA_CDS
131326	+	69.06	AAATCCCTGAAGAGTACAAAGAGCAAGCTGAAGAGCTTCGCAACAGCCTTA	-7.8	9.13	fusA_CDS
131349	+	30.25	CAAGCTGAAGAGCTTCGCAACAGCCTTATTGAAGCTGTATGTGAGCTTGAT	-16.4	0	fusA_CDS
131388	+	41.38	TGTGAGCTTGATGAAGAGCTTATGGATAAGTACCTTGAGGGTGAAGAAATC	-13	0.42	fusA_CDS
131432	+	11.56	AGAAATCACAATTGACGAGTTAAAAGCAGGAATTCGTAAAGGTACATTAAA	-4.6	0	fusA_CDS
131572	+	39.81	CACCAACTGACGTTGCTGCAATCAAAGGTACACGTCCTGATACAAATGAAG	-7.2	6.62	fusA_CDS
131585	+	36.94	TGCTGCAATCAAAGGTACACGTCCTGATACAAATGAAGAGATTGAGCGTCA	-7.6	16.12	fusA_CDS
131604	+	25.25	CGTCCTGATACAAATGAAGAGATTGAGCGTCATTCTTCTGACGAAGAGCCA	-6.8	2.68	fusA_CDS
131624	+	47.38	GATTGAGCGTCATTCTTCTGACGAAGAGCCATTCTCTGCATTAGCATTTAA	-9.4	0	fusA_CDS
131657	+	19.75	CTCTGCATTAGCATTTAAAGTTATGACTGACCCTTACGTTGGTAAGTTGAC	-7.4	0	fusA_CDS
131659	+	19.69	CTGCATTAGCATTTAAAGTTATGACTGACCCTTACGTTGGTAAGTTGACGT	-7.9	0.68	fusA_CDS
131831	+	16.63	TACTGTATACGCAGGGGATATCGCAGCTGCTGTAGGTCTAAAAGATACAAC	-8.4	25.83	fusA_CDS
131840	+	22.38	CGCAGGGGATATCGCAGCTGCTGTAGGTCTAAAAGATACAACTACTGGAGA	-8.2	28.19	fusA_CDS
131847	+	22.63	GATATCGCAGCTGCTGTAGGTCTAAAAGATACAACTACTGGAGATACTCTA	-6.2	0	fusA_CDS
131921	+	54.94	CCTTGAGTCAATGGAATTCCCAGAACCAGTTATCGACGTTGCTATTGAGCC	-5.4	2.32	fusA_CDS
132028	+	92.5	AAGATCCTACATTCCGTACTCAAACAAACCCAGAAACTGGCCAAACGATCA	-5	6.28	fusA_CDS
132045	+	14.38	ACTCAAACAAACCCAGAAACTGGCCAAACGATCATCTCTGGTATGGGTGAA	-9.6	0	fusA_CDS
132096	+	128.13	CTTCACCTTGATATCATTGTTGACCGTATGAAACGCGAATTTAAAGTAGAA	-2.7	9.94	fusA_CDS
132133	+	18.06	AATTTAAAGTAGAAGCCAATGTTGGTGCTCCTCAAGTTGCGTACCGTGAAA	-5.4	0	fusA_CDS
132254	+	42.94	CGTTTGGATCGAATTCGAACCAAACGAAGAAGGCGCTGGCTTTGAATTTGA	-16.9	0	fusA_CDS
132311	+	16.94	GATTGTCGGTGGGGTCGTTCCTCGTGAATACATCCCAGCTGTTCAAGCAGG	-13.2	3.54	fusA_CDS
132369	+	29.88	GATGCACTCGAAAATGGTGTACTAGCAGGCTTCCCGCTTATCGACATTAAA	-6.9	0	fusA_CDS
132425	+	21.31	ACTTTTCGACGGTTCTTACCATGATGTTGACTCAAACGAAATGGCATTTAA	-5.8	0	fusA_CDS
132496	+	16.38	TGAAAAATGCAGTCAGCAAATGTAACCCAGTTCTTCTTGAACCAATCATGA	-4.9	0	fusA_CDS
132580	+	10.69	GAGATATCATGGGTGATATCACTTCACGTCGCGGACGCGTAGAAGGTATGG	-14.5	0	fusA_CDS
132686	+	23.69	CGGTTACGCTACTGCACTTCGTTCTAATACGCAAGGTCGCGGTACGTTCAC	-13.4	2.29	fusA_CDS
132746	+	147.69	GGATCACTACGAAGAAGTGCCGAAGAGCGTCGCAGAAGAAATTATCAAAAA	-3.5	0	fusA_CDS
132792	+	32.88	AAAAAAAATAAAGGCGAATAATTGATTTTGCCGCTTAACTCAAGTATAACT	-7.7	0.78	fusA+30
132841	+	628.94	CTACTATTGTAAGATGAGGAAGTGAAAGCTTTCTTTCACTTCCTATCACTC	-20.5	0	fusA+79
132923	+	31.38	GATTTTAGAATGGCTAAAGAAAAATTCGACCGTTCCAAATCACATGCCAAT	-7.9	0	tufA_CDS
132961	+	35.69	ATCACATGCCAATATTGGTACAATTGGACACGTTGACCATGGTAAAACAAC	-10.1	0	tufA_CDS
132992	+	14.06	GTTGACCATGGTAAAACAACTTTAACTGCTGCTATCACAACAGTACTTCAT	-5.4	0	tufA_CDS
133013	+	23.94	TTAACTGCTGCTATCACAACAGTACTTCATAAGAAATCTGGTAAAGGTACA	-5.1	0	tufA_CDS
133017	+	26.5	CTGCTGCTATCACAACAGTACTTCATAAGAAATCTGGTAAAGGTACAGCTA	-9.8	0	tufA_CDS
133070	+	13.19	GCGTACGATCAAATTGATGGTGCTCCAGAAGAACGCGAGCGCGGTATCACA	-11.6	0	tufA_CDS
133148	+	18.31	ACTGAAACTCGTCACTATGCACACGTTGACTGCCCAGGACACGCTGACTAT	-5.1	7.78	tufA_CDS
133231	+	12.69	GGACGGAGCTATCCTTGTAGTATCTGCTGCTGATGGCCCAATGCCACAAAC	-15.9	6.94	tufA_CDS
133257	+	84.25	CTGCTGATGGCCCAATGCCACAAACTCGTGAGCACATCCTTCTTTCTAAAA	-7.3	8.29	tufA_CDS
133288	+	110.63	GCACATCCTTCTTTCTAAAAACGTTGGTGTACCATACATCGTTGTATTCTT	-6.9	0	tufA_CDS
133333	+	43.75	ATTCTTAAACAAATGCGACATGGTAGACGACGAAGAGCTTCTTGAACTAGT	-4.1	0.46	tufA_CDS
133352	+	22.13	ATGGTAGACGACGAAGAGCTTCTTGAACTAGTTGAAATGGAAGTTCGCGAT	-8.8	0	tufA_CDS
133511	+	81.94	ATGGATGCGGTTGATGAGTACATCCCAACTCCAGAACGCGACACTGAAAAA	-7.5	0.59	tufA_CDS
133610	+	30.5	ACAGTTGCTACTGGCCGTGTAGAACGCGGACAAGTTAAAGTCGGTGACGAA	-13.4	5.08	tufA_CDS
133653	+	65.5	GTGACGAAGTTGAAATCATCGGTCTTCAAGAAGAGAACAAGAAAACAACTG	-5.3	0.73	tufA_CDS
133731	+	33.94	TTCTTGATTACGCTGAAGCTGGTGACAACATTGGTGCCCTTCTTCGCGGTG	-11.7	0	tufA_CDS
133899	+	62.5	CTCCATTCTTCTCTAACTACCGTCCTCAGTTCTACTTCCGTACAACTGACG	-7.3	0	tufA_CDS
133934	+	151.5	TTCCGTACAACTGACGTAACTGGTATCATCCATCTTCCAGAAGGCGTAGAA	-7.3	0	tufA_CDS
133955	+	32.38	GGTATCATCCATCTTCCAGAAGGCGTAGAAATGGTTATGCCTGGAGATAAC	-13.8	2.46	tufA_CDS
134078	+	77.56	GGACGTACTGTTGGTTCAGGCGTTGTTTCTACAATCACTGAGTAATAGTAT	-16.3	20.81	tufA+6
134084	+	76.81	ACTGTTGGTTCAGGCGTTGTTTCTACAATCACTGAGTAATAGTATGGTTTT	-14	13.9	tufA+12
134114	+	23981.6	ACTGAGTAATAGTATGGTTTTAAACGAGACCCCTGTGGGTCTCGTTTTTTG	-17.3	98.08	tufA+42
135325	+	45.88	CACACCCGGCCGCTTTGCCATGGCAAGGTGTTCAGGTTTTTCTCACGGAGA	-16	0	ybaC+198
135330	+	43.94	CCGGCCGCTTTGCCATGGCAAGGTGTTCAGGTTTTTCTCACGGAGAACTGT	-17.6	0	ybaC+203
135339	+	33.88	TTGCCATGGCAAGGTGTTCAGGTTTTTCTCACGGAGAACTGTCTAACGTGA	-11.1	0.11	ybaC+212
135351	+	27.31	GGTGTTCAGGTTTTTCTCACGGAGAACTGTCTAACGTGATGTAGGCGAAAA	-9.6	31.71	ybaC+224
135379	+	108.94	GTCTAACGTGATGTAGGCGAAAAGGAGGGAAAATAATGGCAAAACAAAAAA	-3.9	0	rpsJ_CDS
135391	+	108.25	GTAGGCGAAAAGGAGGGAAAATAATGGCAAAACAAAAAATTCGTATTCGTT	-3.4	6.75	rpsJ_CDS
135499	+	45.38	CAAAACGTTCTGGTGCCAGCGTATCTGGTCCGATTCCGTTGCCAACTGAAA	-9.9	0	rpsJ_CDS
135539	+	50.13	GCCAACTGAAAAATCAGTTTACACAATCCTTCGTGCGGTGCACAAATACAA	-8.5	0.25	rpsJ_CDS
135561	+	65.44	ACAATCCTTCGTGCGGTGCACAAATACAAAGATTCTCGTGAGCAATTTGAA	-5.6	3.33	rpsJ_CDS
135581	+	10	CAAATACAAAGATTCTCGTGAGCAATTTGAAATGCGTACACATAAACGTTT	-5.4	0	rpsJ_CDS
135606	+	60.69	TTTGAAATGCGTACACATAAACGTTTAATCGACATTGTGAACCCAACACCA	-5.5	6.21	rpsJ_CDS
135666	+	60.38	GATGCTCTTATGCGATTAGACTTACCATCTGGTGTCGATATCGAAATTAAA	-8	0	rpsJ_CDS
135741	+	28.19	TCTTAATAGGAGGTGTGACGAATGACCAAAGGAATCTTAGGAAGAAAAATT	-6.9	0.25	rplC_CDS
135823	+	25.25	ATCTTATTCCGGTAACTGTTATCGAGGCTGCTCCAAACGTTGTTCTTCAAA	-4.6	0	rplC_CDS
135953	+	43.25	TGAAAAAGGGCACGTTGCAAAAGCGGAAACTGCTCCTAAGCGCTTCGTTAA	-10.1	0	rplC_CDS
135980	+	26.5	AACTGCTCCTAAGCGCTTCGTTAAAGAATTACGCGGAGTGGAAATGGATGC	-13.4	0	rplC_CDS
136107	+	21.81	GGTAAAGGTTTCCAAGGTGCGATCAAGCGCCACGGACAATCTCGCGGACCT	-16.8	8.26	rplC_CDS
136217	+	14.06	CCGTGTATTCAAAGGTAAATTATTACCTGGACGTATGGGCGGAGAGCAAAT	-13.1	0	rplC_CDS
136254	+	69.94	GGCGGAGAGCAAATCACTGTTCAAAACCTTGAAATCGTAAAAGTTGATGCA	-5.6	5.01	rplC_CDS
136300	+	23.81	ATGCAGAACGCAATCTTCTTTTGATCAAAGGTAACGTACCTGGTGCGAAGA	-10.1	21.72	rplC_CDS
136304	+	24.5	AGAACGCAATCTTCTTTTGATCAAAGGTAACGTACCTGGTGCGAAGAAATC	-9.5	11.22	rplC_CDS
136317	+	22.75	CTTTTGATCAAAGGTAACGTACCTGGTGCGAAGAAATCTTTAATCACTGTT	-8.8	3.09	rplC_CDS
136444	+	58.94	AAAACGGTTCTACTGCTGGTGACATCGAATTAAACGCTTCTGTATTTGGTA	-6.2	0	rplD_CDS
136480	+	98.75	CTTCTGTATTTGGTATCGAACCAAATGAGAGTGTTGTATTCGACGCTATTC	-14.7	0	rplD_CDS
136572	+	25.44	AAAAATCGTTCTGAAGTACGCGGCGGAGGTCGTAAACCATGGCGTCAAAAA	-8.8	0.23	rplD_CDS
136704	+	26.63	AGCTATTCTTATAAATTACCTAAAAAAGTTCGCCGCTTGGCAATCAAATCA	-4.3	0	rplD_CDS
136782	+	31.19	AACATCATCGTTCTTGAAGATCTTACTCTTGATACGGCTAAAACAAAAGAA	-3.2	24.1	rplD_CDS
136858	+	25.38	CTGTTGAGAAAAAAGCTTTAATCGTAACTGCGGATGCAAACGAAGCAGTAG	-7.3	0	rplD_CDS
136993	+	31.06	TTCTGATTACAAAAGCAGCGGTTGAAAAAGTAGAGGAGGTGCTTGCATAAT	-6.7	0	rplW_CDS
137063	+	92.94	CTAAAGCGCCCCGTCATTACTGAACGTTCTGCCGATTTAATGACTGAAAAA	-5.7	5.56	rplW_CDS
137205	+	24.5	ACATCATGAACTACAAAGGCAAATCAAAACGTGTTGGACGCTACACTGGTA	-3.7	0	rplW_CDS
137267	+	53.94	CGCAGAAAAGCGATCGTAAAACTTACTGCAGACAGCAAAGAAATCGAAATT	-7.3	0	rplW_CDS
137323	+	10.38	AGCTTAATTATCTGTAAAAAGAAGGAGGGAAATTCAAAATGGCGATTAAAA	-2.4	0	rplB_CDS
137353	+	25.63	AATTCAAAATGGCGATTAAAAAGTATAAACCGACCTCTAATGGACGTCGTG	-5.4	2.85	rplB_CDS
137424	+	30.75	GCTGAAATCACGACTGACAAGCCGGAAAAATCCTTGCTTGCTCCCCTTCAC	-8.2	0	rplB_CDS
137511	+	21.19	GTACGTCACCAAGGTGGCGGACATAAACGCCAATACCGTGTTATCGACTTC	-12.7	0	rplB_CDS
137525	+	12.69	TGGCGGACATAAACGCCAATACCGTGTTATCGACTTCAAACGCGATAAAGA	-13.7	0	rplB_CDS
137562	+	20.88	AAACGCGATAAAGATGGTATACCTGGACGCGTTGCTACAGTTGAATACGAT	-6.7	6.61	rplB_CDS
137598	+	35.5	ACAGTTGAATACGATCCAAACCGTTCAGCTAACATCGCTCTAATCAACTAT	-6.8	22.16	rplB_CDS
137609	+	24.25	CGATCCAAACCGTTCAGCTAACATCGCTCTAATCAACTATGCAGACGGAGA	-5.5	39.26	rplB_CDS
137715	+	44.56	GGTCCTGAAGCTGACATTAAAGTAGGTAATGCACTTCCACTTATCAACATC	-6.1	0	rplB_CDS
137774	+	34.25	TACAGTTGTGCATAACATTGAATTAAAACCTGGTAAAGGCGGACAGCTTGT	-5.8	0	rplB_CDS
138139	+	25	GTAAGAAAAAGAACAAATCCGATAAATTTATCGTACGTCGTCGTAAAAATA	-5.7	0.83	rplB_CDS
138188	+	2341.44	TAAATAACGGGGTTGTCTACGGTTCTTTTCGGACCGTAGTGCAATCACGAA	-21.1	21.79	rplB+44
138230	+	36.69	AATCACGAAGGGAGGTTCCAAAATGGCTCGCAGCTTAAAAAAAGGACCATT	-7.5	0	rpsS_CDS
138266	+	12.63	AAAAAAAGGACCATTTGTCGATGGACACTTGATGACTAAAATCGAGAAATT	-9.2	1.31	rpsS_CDS
138334	+	20.31	AACAAGTCGTAAAAACTTGGTCTCGTCGTTCTACTATTTTCCCACAGTTTA	-3.1	0	rpsS_CDS
138389	+	36.31	TCACACAATCGCAGTCTATGACGGACGTAAACACGTGCCTGTATTCATCTC	-5	0	rpsS_CDS
138419	+	22.75	ACACGTGCCTGTATTCATCTCTGAAGATATGGTAGGGCACAAGTTGGGTGA	-12.4	0	rpsS_CDS
138454	+	11.88	GGCACAAGTTGGGTGAATTCGCTCCAACTCGTACGTACAAAGGTCATGCTA	-12	0	rpsS_CDS
138459	+	10.75	AAGTTGGGTGAATTCGCTCCAACTCGTACGTACAAAGGTCATGCTAGTGAT	-12.6	0	rpsS_CDS
138463	+	11	TGGGTGAATTCGCTCCAACTCGTACGTACAAAGGTCATGCTAGTGATGACA	-10	0	rpsS_CDS
138469	+	11.75	AATTCGCTCCAACTCGTACGTACAAAGGTCATGCTAGTGATGACAAAAAAA	-5	2.97	rpsS_CDS
138644	+	99.44	TATCAATCTTGAACCTTACACCAAGAGCTGCTTCTCCAATTATCGAGAAAG	-8.1	7.99	rplV_CDS
138682	+	121.13	ATTATCGAGAAAGTATTAAAATCCGCTATTGCAAATGCTGAGCATAACTAT	-4	0	rplV_CDS
138814	+	25.25	ATGGGACGTGCGAGCCAAATCAACAAACGTACGAGCCACATTACAATCGTT	-10.4	0	rplV_CDS
138835	+	10.06	AACAAACGTACGAGCCACATTACAATCGTTGTATCAGAAAAGAAGGAGGGA	-3.3	8.08	rplV_CDS
138898	+	23.81	CAAAAGGTAAATCCAGTCGGTCTTCGTATCGGAGTCATTCGTGATTGGGAA	-10.4	0	rpsC_CDS
138957	+	47.19	GTACGCTGGTAAAGATTACGCTGACTTCCTGCACGAAGATTTAAAAATTCG	-5.8	9.15	rpsC_CDS
138999	+	94.44	AAAAATTCGTGAATACATTAGCAAACGCCTTTCTGACGCTTCTGTTTCTAA	-4.3	0	rpsC_CDS
139148	+	28.94	TTCGCAAAGCCCTTAACAGCCTTACTGGCAAGCGTGTACACATTAACATTC	-5.9	0	rpsC_CDS
139153	+	28.88	AAAGCCCTTAACAGCCTTACTGGCAAGCGTGTACACATTAACATTCTTGAA	-8	0	rpsC_CDS
139177	+	21.81	AAGCGTGTACACATTAACATTCTTGAAATCAAAAGAGCAGATCTTGATGCA	-6.1	3.57	rpsC_CDS
139260	+	28.69	AGAAAACCGTGTTTCTTTCCGCCGTGCGCAGAAACAACAAATCCAACGTAC	-8.5	6.77	rpsC_CDS
139332	+	23.25	TGTGAAAACAATGGTTTCTGGTCGTCTTGGCGGTGCAGATATCGCTCGTTC	-10.5	5.77	rpsC_CDS
139369	+	23.38	GATATCGCTCGTTCTGAATACTACAGTGAAGGAACTGTTCCATTGCACACA	-7.2	0	rpsC_CDS
139409	+	39.5	CATTGCACACATTACGTGCGGACATTGACTATGCAACATCTGAAGCTGATA	-6.3	3.09	rpsC_CDS
139505	+	29.88	AGGTTCTTCCTACTAAGAAGAAAAATGAGGAAGGAGGAAAATAATATGTTA	-8.6	2.01	rplP_CDS
139522	+	27.13	AAGAAAAATGAGGAAGGAGGAAAATAATATGTTATTACCAAAACGCGTTAA	-1.5	6.15	rplP_CDS
139580	+	39	AGAGAGCATCGCGGAAAAATGCGTGGCCGTGCGAAAGGCGGTACTGAAGTA	-11.5	0	rplP_CDS
139701	+	37.44	GTATTGCGATGACTCGTTACATGAAACGTGGCGGTAAAGTTTGGATCAAAA	-9.8	0	rplP_CDS
139813	+	29.31	GGCTCCAGAAGGTTGGGTAGCTGTTGTAAAACCGGGCAAAGTTTTATTTGA	-8.3	0	rplP_CDS
139964	+	55.88	GGTGAATCAAATGAAAGCTAATGAAATTCGTGACCTTACCACTGCTGAAAT	-5.9	21.92	rpmC_CDS
140034	+	27.75	CTTAAAGAAGAACTTTTCAATCTTCGCTTTCAATTAGCGACAGGACAACTT	-6.7	0	rpmC_CDS
140067	+	31.75	TTAGCGACAGGACAACTTGAAAATACTGCTCGCATTCGTGAAGTGCGCAAA	-9.3	0	rpmC_CDS
140118	+	11.75	GCTATCGCGCGCATGAAAACTGTGATTCGTGAAAGAGAAATTGCTGCTAAT	-7.3	2.34	rpmC_CDS
140125	+	12.69	CGCGCATGAAAACTGTGATTCGTGAAAGAGAAATTGCTGCTAATAAATAAT	-4.3	2.74	rpmC+1
140218	+	20.31	AAAGTTTACCAAGGCCGTGTTGTTTCTGACAAAATGGATAAAACCATTACT	-6.1	0	rpsQ_CDS
140251	+	16.94	ATGGATAAAACCATTACTGTTGTTGTTGAGACATACAAAAAACATACACTT	-5.3	0	rpsQ_CDS
140282	+	70.06	CATACAAAAAACATACACTTTACGGTAAACGCGTAAAATACTCAAAAAAAT	-4.4	0.26	rpsQ_CDS
140302	+	14.06	TACGGTAAACGCGTAAAATACTCAAAAAAATTCAAAGCACATGATGAAAAT	-2.4	0	rpsQ_CDS
140410	+	43.44	ACTAAGCGTTTCCGTCTAGTTGAAGTTGTCGAAGAAGCTGTTATTATCTAA	-5.9	0	rpsQ_CDS
140514	+	15.25	AGACTCGTTTAAAAGTAGCTGACAACTCTGGCGCACGTGAAGTACTTACTA	-2.9	0	rplN_CDS
140610	+	29.5	ATGTAATTGTTTGCACGGTTAAACAAGCAACACCAGGAGGCGTTGTCAAAA	-11.5	0.9	rplN_CDS
140636	+	14.06	GCAACACCAGGAGGCGTTGTCAAAAAAGGTGAAGTCGTAAAAGCTGTTATC	-8.2	0	rplN_CDS
140695	+	46	TAAAAGCGGAGCGCGCAGAAGTGACGGTTCATACATCAGCTTCGATGAGAA	-10.5	0	rplN_CDS
140882	+	33.63	CCTTACTCAAGGAGGTGCGATCAGGATGCATGTAAAAAAAGGCGATAAAGT	-4.5	3.1	rplX_CDS
140920	+	86.19	AAGGCGATAAAGTTATGGTTATCTCTGGTAAAGATAAAGGCAAACAAGGAA	-4	0	rplX_CDS
141077	+	144	TAATCAAGAGGCGCCAATTCATGTATCAAACGTTATGCCGCTCGATCCTAA	-5.8	0	rplX_CDS
141109	+	18.13	TTATGCCGCTCGATCCTAAAACAGGTGAAGTGACTCGCGTAGGATACAAAG	-8.4	0	rplX_CDS
141221	+	45.31	TTAAAAGGAAGGGAGGTCTATCTCATGAACCGCCTTAAAGAAAAGTACAAT	-7.7	0.45	rplE_CDS
141257	+	73	AAAGAAAAGTACAATAAAGAAATTGCACCTGCTTTAATGACTAAGTTCAAC	-4.2	0	rplE_CDS
141629	+	44.44	ACACTTGGTATCAAAGAACAGTTAATCTTCCCTGAAATTGACTACGATAAA	-3.9	0	rplE_CDS
141805	+	74.38	TCGTGGCTAAAAAGTCTATGATTGCGAAACAACAACGTACACCAAAGTTTA	-7.4	0	rpsN_CDS
142006	+	24.75	GAAGGAGGTAATTATATAATGGTTATGACAGATCCAATTGCAGATATGCTA	-6.2	0	rpsH_CDS
142148	+	62.56	GTGAAGGTTTCATTCGTGACGTTGAGTTCGTAGAAGACAGCAAACAAGGTA	-5.2	0	rpsH_CDS
142321	+	140.25	GGTCTTGGAATCGCGATTATTTCTACATCACAAGGTGTTTTAACGGACAAA	-5.8	11.81	rpsH_CDS
142379	+	10.25	GTGCAAAACAAGCTGGTGGAGAAGTTCTAGCATACGTTTGGTAAGAAGTTT	-7.8	0	rpsH+7
142459	+	70.44	GTGTAGGTAAGAAGCTACTTGAGATTCCTTCTGATGTTACAGTAACGTTAA	-8.6	0	rplF_CDS
142502	+	11.88	AACGTTAAATGATAACAACACTGTAGCTGTGAAAGGACCAAAAGGAGAATT	-2.5	1.19	rplF_CDS
142526	+	47.5	AGCTGTGAAAGGACCAAAAGGAGAATTAACTCGTACGTTTCACCCTGATAT	-4.9	13.19	rplF_CDS
142548	+	35.38	GAATTAACTCGTACGTTTCACCCTGATATGGAGATTAAAGTAGAGGACAAT	-5.4	3.31	rplF_CDS
142835	+	12.13	TCAAACAAAAGTAGTTGTAAAAGGTACAGACAAAGAACGCGTAGGAGCTAT	-4	0	rplF_CDS
142876	+	26.31	TAGGAGCTATTGCTGCTAACATCCGCGCTGTACGTTCTCCAGAGCCTTACA	-10.5	0	rplF_CDS
142906	+	37.31	TACGTTCTCCAGAGCCTTACAAAGGTAAAGGAATCCGCTACGAAGGTGAAG	-8.8	0	rplF_CDS
142932	+	25.44	AAAGGAATCCGCTACGAAGGTGAAGTTGTTCGCCGTAAAGAAGGTAAATCT	-9.3	0	rplF_CDS
142996	+	24	GCTTAAAGTGAAGAAAGGAGTGACCTAGATGATTACGAAAACTAGCAAAAA	-3.9	10.56	rplR_CDS
143002	+	23.88	AGTGAAGAAAGGAGTGACCTAGATGATTACGAAAACTAGCAAAAATGCTGC	-5.4	4.88	rplR_CDS
143046	+	19.25	ATGCTGCTCGTCTTAAAAGACACGCTCGTGTTCGCGCTAAACTTTCCGGTA	-6.7	7.14	rplR_CDS
143103	+	14.31	AAAGACCGCGCCTGAACGTTTTCCGTTCTAACAAGCACATTTACGCTCAAA	-6.2	0	rplR_CDS
143118	+	24.75	ACGTTTTCCGTTCTAACAAGCACATTTACGCTCAAATCATCGATGATGTAA	-5.6	0	rplR_CDS
143333	+	26.06	GGACGTGTAAAAGCTTTGGCTGATGCCGCTCGTGAAGCTGGACTTAAATTT	-9.1	0	rplR_CDS
143518	+	72.44	AGTCGTTGTCGGTGACAAAAACGGACACGTAGGATTCGGTACTGGTAAAGC	-8.2	0	rpsE_CDS
143548	+	10.69	AGGATTCGGTACTGGTAAAGCACAAGAAGTACCAGAAGCGATTCGCAAAGC	-11.3	0	rpsE_CDS
143570	+	57.63	CAAGAAGTACCAGAAGCGATTCGCAAAGCTGTTGAAGATGCGAAAAAGAAT	-6.4	0	rpsE_CDS
143693	+	12.5	TTGTTAAAACCTGCTTCTGAAGGTACTGGAGTTATCGCTGGAGGCCCTGTA	-8.2	20.1	rpsE_CDS
143795	+	13.88	GGTTCTAACACACCGATCAACATGATTCGTGCAACACTTCAAGGTTTAAGT	-5.4	0	rpsE_CDS
143960	+	207.75	AATCGGTCGCCCGGAAGACCAACGCGTTACTGTAAGAACACTTGGTTTAAA	-10	0	rpmD_CDS
144021	+	57.31	CAAACTGTTGTTCATGAAGACAACGCTGCGATCCGTGGTATGATTAATAAA	-8.8	0	rpmD_CDS
144391	+	33.81	CAGAAGGAACGGAAGTCACTCCTGAACTTCTTCTAGAGACTGGTGTTATTA	-9.2	5.61	rplO_CDS
144435	+	210.13	GTTATTAGCAAACTTAATGCAGGAGTAAAGATTCTTGGCAACGGTAAATTA	-7	0.74	rplO_CDS
144551	+	134.88	TGGCGGTACAGCTGAGGTGATCTAACTTGTTTAAAACAATCTCCAACTTTA	-6.1	6.86	secY_CDS
144578	+	122.81	TGTTTAAAACAATCTCCAACTTTATGCGTGTGAGTGATATCAGGAATAAAA	-2.4	0	secY_CDS
144852	+	537.06	ACCGAAGTTTACCGAGTGGTCTAAGCAAGGTGAAGTTGGCCGCCGTAAATT	-13.5	0	secY_CDS
144879	+	29.56	AGGTGAAGTTGGCCGCCGTAAATTAGCTCAGTTCACAAGGTACTTTACGAT	-9.7	0	secY_CDS
144915	+	48.13	AAGGTACTTTACGATTGTGCTTGGTTTCATCCAAGCGTTAGGTATGTCATA	-12	0	secY_CDS
144936	+	72.69	TGGTTTCATCCAAGCGTTAGGTATGTCATATGGATTCAACAATCTGGCAAA	-7.5	0	secY_CDS
145017	+	21	GACATATCTTATCATTGCTTTAGTGCTCACTGGCGGAACTGCCTTTTTAAT	-5.5	1.61	secY_CDS
145222	+	42.06	AAAGTCGCACTTCTTGTGATTGCGATTTTAGCAGTTATTGTTGGAGTTATT	-12	1.51	secY_CDS
145295	+	27.94	AAATTGCGATTCAATATGCTAAAGGCACAGGTCGTTCACCTGCTGGCGGAG	-9.1	6.67	secY_CDS
145367	+	30.81	TGAAAGTGAATCCTGCAGGGGTTATTCCGGTAATCTTTGCGGTTGCGTTTT	-14.8	0	secY_CDS
145424	+	24.25	CGCCGCGGACGATCGCGTCATTCTTTGGAACAAACGATGTGACAAAGTGGA	-12.7	0	secY_CDS
145541	+	15.06	TTACGTACTTTTATGCTTTTGTACAGGTAAACCCTGAACAAATGGCTGATA	-11.2	0	secY_CDS
145581	+	286.38	AATGGCTGATAACCTTAAAAAACAGGGTGGCTATATCCCGGGGGTTCGTCC	-11.1	4.13	secY_CDS
145609	+	33.13	GGCTATATCCCGGGGGTTCGTCCAGGGAAAATGACTCAAGATAGAATTACG	-11.2	3.91	secY_CDS
145852	+	1183.69	CGTGGATTTATGAAAAACTAGAGGAAATGGATTTATCCATTCCCTCTTAAT	-13	0	secY+30
145884	+	40.31	TTATCCATTCCCTCTTAATAAAGAGAGGACGGGGGAAATCCGAATGAACTT	-14.7	0	adk_CDS
145944	+	28.13	GGGGCTTCCTGGTGCCGGTAAAGGCACACAGGGCGAACGAATTGTTGAGGA	-17.7	0	adk_CDS
146128	+	523.56	GTAAAAGAGAGACTTGGCAAAGATGATTGTGAAAGAGGTTTTCTTCTGGAC	-6.8	0	adk_CDS
146148	+	253.38	AGATGATTGTGAAAGAGGTTTTCTTCTGGACGGATTTCCGCGAACAGTCGC	-10.8	4.62	adk_CDS
146206	+	20.31	GAAGCTCTTGAAGAAATTCTTGAGGAATACGGCAAGCCGATTGATTATGTC	-8.7	0	adk_CDS
146292	+	11.63	ACGTCTGACTGGACGCAGAATTTGCAGTGTTTGCGGCACAACCTATCATTT	-8	0	adk_CDS
146328	+	45.75	CACAACCTATCATTTAGTCTTTAATCCGCCGAAAACGCCGGGTATTTGTGA	-9	0	adk_CDS
146363	+	32.13	CGCCGGGTATTTGTGATAAAGACGGAGGCGAACTCTATCAACGGGCAGATG	-9.3	8.87	adk_CDS
146429	+	29.25	TCTCTAAACGGCTTGAGGTAAACATGAAGCAAACTCAGCCTTTACTCGATT	-9.1	0	adk_CDS
146528	+	19.38	TTCAAGACGTTTATGCAGATGTGAAGGATCTTCTTGGAGGATTAAAAAAAT	-8	0	mapA_CDS
146599	+	42.69	GTGAACTTGGTATCATGCGGGAAGCAGGGCGAATCGTGGCTTTAACTCATG	-8.8	0	mapA_CDS
146644	+	57.63	CTCATGAAGAGTTAAAAAAGCACATTAAACCAGGAATCTCGACAAAAGAAT	-1.8	5.7	mapA_CDS
146670	+	53.5	AAACCAGGAATCTCGACAAAAGAATTGGATCAAATTGCCGAACGTTTTATT	-2.2	0	mapA_CDS
146804	+	24.31	TCACGGCATACCTGGCAGCAGGGTGCTGAAGGACGGTGACATCATCAGTAT	-16.4	0	mapA_CDS
146822	+	40.75	CAGGGTGCTGAAGGACGGTGACATCATCAGTATTGATATCGGTGCTAAATT	-9.5	0	mapA_CDS
146957	+	18.13	GGAGTCTTTATATAAAGGCTTGCAGGAAGCAAAACCAGGTGAACGTTTGTC	-7.5	0	mapA_CDS
146991	+	192	CCAGGTGAACGTTTGTCGAATATTTCCCACGCAATACAAACGTATGTCGAA	-6.2	0	mapA_CDS
147133	+	15.81	CCAACAAAGGACCACGGCTTAAACCTGGCATGGTTCTCGCTATTGAACCTA	-12	0	mapA_CDS
147166	+	14.38	TTCTCGCTATTGAACCTATGGTGAACGCTGGCAGCCGCTACGTGAAAACAT	-12.8	0	mapA_CDS
147218	+	188.94	GGCTGATAACTGGACGGTTGTAACGGTAGATGGGAAAAAGTGTGCTCATTT	-10.2	0	mapA_CDS
147351	+	24.56	GTTTTTCAAGCTTGATAGGGCAGAAAGCTTGGGTGAACATTGGCAAGACCG	-11.6	3.36	ybzG_CDS
147394	+	79.81	CAAGACCGAATTCATCTTGCTTCTTGTCGTTGGAATTTTAACCATCATCAA	-4	0	ybzG_CDS
147417	+	18.94	TTGTCGTTGGAATTTTAACCATCATCAATGTACTAACAGCAGACGGAGAAA	-5.6	12.87	ybzG_CDS
147440	+	36.88	ATCAATGTACTAACAGCAGACGGAGAAAAGCGTACATTTCATTCTCCTAAG	-7	0	ybzG_CDS
147505	+	27.31	TCATTTAACCCTTTATGATTGCGTATCTCCGGAAGTTCAGAACAGTATAAA	-1.9	1.24	ybzG_CDS
147653	+	103.19	ATTGAAGTGGAAGGTACTATAGTCGAAACACTGCCAAACGCGATGTTCAAA	-7.7	0	infA_CDS
147708	+	16.81	AACTTGAAAATGGCCACACTGTTTTGGCTCATGTATCTGGTAAAATCCGCA	-9.4	2.26	infA_CDS
147764	+	24.44	TTCATTCGCATTTTACCTGGAGACAAAGTTACGGTAGAATTATCTCCATAT	-6.3	0.01	infA_CDS
147875	+	137.19	GGTTGGAAACACATGAAAGTGAGACCATCAGTTAAACCAATCTGCGAAAAA	-6.8	0	rpmJ_CDS
147902	+	22.5	TCAGTTAAACCAATCTGCGAAAAATGTAAAGTTATTCGCAGAAAAGGAAAA	-12.4	0	rpmJ_CDS
147932	+	33.06	GTTATTCGCAGAAAAGGAAAAGTAATGGTGATCTGTGAAAATCCAAAGCAT	-7.2	0	rpmJ_CDS
147949	+	24.13	AAAAGTAATGGTGATCTGTGAAAATCCAAAGCATAAACAAAAACAAGGATA	-1.9	9.41	rpmJ_CDS
148026	+	14.81	GCTCGTATTGCTGGTGTAGATATCCCACGTGACAAACGTGTTGTTATTTCT	-7.2	0	rpsM_CDS
148126	+	16.5	AAGAAGCTGGAGTTTCAGAAGATACTCGTGTGCGCGATCTTACTGAAGAAG	-10.2	0	rpsM_CDS
148281	+	24.69	CGCGGAATCCGTCATCGCAGAGGATTACCTGTTCGCGGACAAAACTCTAAA	-10.5	2.78	rpsM_CDS
148335	+	50.81	AACGCGCGTACTCGTAAAGGTCCGCGTCGTACTGTAGCTAACAAGAAAAAA	-10.9	0	rpsM_CDS
148355	+	22.31	TCCGCGTCGTACTGTAGCTAACAAGAAAAAATAAGTAAGGGAGGTTCTTAA	-3.4	4.71	rpsM+17
148391	+	43.06	AAGGGAGGTTCTTAAACAATGGCTGCTGCTCGTAAATCTAACACGCGTAAA	-4.5	2.21	rpsK_CDS
148417	+	30.69	TGCTCGTAAATCTAACACGCGTAAACGTCGCGTGAAAAAGAATATTGAGTC	-14	0	rpsK_CDS
148446	+	16.38	GCGTGAAAAAGAATATTGAGTCTGGAATTGCTCATATTCGTTCAACTTTCA	-9.7	0	rpsK_CDS
148481	+	35.88	ATTCGTTCAACTTTCAATAACACGATCGTTACGATCACTGACACTCATGGT	-5	18.54	rpsK_CDS
148580	+	12.63	CGTAAATCTACTCCTTTTGCTGCGCAAATGGCTGCAGAAACAGCTGCTAAA	-11.1	0	rpsK_CDS
148760	+	35.5	GTTCCTCATAACGGATGCCGTCCACCAAAACGTCGCCGCGTGTAATTTGTT	-5.8	0	rpsK+6
148782	+	37.81	CACCAAAACGTCGCCGCGTGTAATTTGTTTGTATAGATTTTGTGTCCCTGT	-4.2	6.01	rpsK+28
148914	+	184.63	GAATTTCGGATGGAATCTCATATGATTCTATTCGAGGTTTCGACGTTTTGA	-19.7	12.14	rpsK+160
149082	+	27	AACTCTGGGTAACTCCTTACGTCGTATCCTCTTATCCTCACTCCCTGGTGC	-7.4	6.98	rpoA_CDS
149104	+	83.81	CGTATCCTCTTATCCTCACTCCCTGGTGCCGCTGTAACATCAATCCAGATA	-3.5	0	rpoA_CDS
149133	+	66.56	CGCTGTAACATCAATCCAGATAGATGGTGTACTGCACGAATTCTCGACAAT	-11.5	11.69	rpoA_CDS
149293	+	89.44	GGAACTGTAACGGCAGCTGATATTACACACGATAGTGATGTAGAGATCTTA	-10.5	0	rpoA_CDS
149334	+	28.69	AGAGATCTTAAATCCTGATCTTCATATCGCGACTCTTGGTGAGAATGCGAG	-13	0	rpoA_CDS
149500	+	127.56	TCTCGTGTATCTTATCAGGTAGAGAACACTCGTGTAGGCCAAGTTGCAAAC	-8	0	rpoA_CDS
149555	+	36.06	ATAAACTTACACTTGATGTTTGGACTGATGGAAGCACTGGACCGAAAGAAG	-5.4	5.37	rpoA_CDS
149587	+	52.06	AGCACTGGACCGAAAGAAGCAATTGCGCTTGGTTCAAAGATTTTAACTGAA	-9.3	48.4	rpoA_CDS
149629	+	35.38	TTAACTGAACACCTTAATATATTCGTTGGTTTAACTGACGAAGCTCAACAT	-7.6	0	rpoA_CDS
149679	+	26.25	TGCTGAAATCATGGTTGAAAAAGAAGAAGATCAAAAAGAGAAAGTTCTTGA	-3.6	0	rpoA_CDS
149779	+	45.44	AAGCGTGCGGGTATTAACACGGTTCAAGAGCTTGCGAACAAGACGGAAGAA	-6.4	27.67	rpoA_CDS
149908	+	48.13	CTTCGCAAAGACGATTGACTAGTTTCCCTTGTGAACTAGGATTTTCGTGTG	-9.5	0	rpoA+33
149992	+	24.75	GGGGACATCACATGTCATACAGAAAACTAGGACGTACGAGTGCACAGCGTA	-5.2	0	rplQ_CDS
150022	+	88.5	GACGTACGAGTGCACAGCGTAAAGCTATGCTTCGTGATCTTACAACTGATT	-14	0	rplQ_CDS
150145	+	19.63	TCACGCTTGGCAAACGCGGTGATCTTCACGCTCGCCGTCAAGCTGCTGCAT	-14.4	4.82	rplQ_CDS
150182	+	278.69	TCAAGCTGCTGCATACATCCGCAACGAGGTTGCAAACGAAGAAAATAATCA	-6.5	10.78	rplQ_CDS
150390	+	3296.88	AAGGGCGGGACAGTTTCTAACTGGATCTATGCCCTTTTTTTAGATACTGCA	-13.3	43.73	rplQ+75
150601	+	19.63	TGGCTTGCAATCGTAGGTCATAACGGTTCAGGGAAATCAACACTGGCCCGG	-16	25.05	cbiO_CDS
150761	+	76.69	AAAATCCGGATAACCAATTTGTCGGAACGACTGTTCGCGATGATGTGGCTT	-13.5	2.89	cbiO_CDS
150858	+	68.81	AGTAGACTGGGCAGTAAAACAGGTGAATATGCAAGATTTTCTCGATCAAGA	-2.7	1.82	cbiO_CDS
151052	+	22.31	ATTTAAAAGAGCAGGGCATGGCGACTGTCATATCCATTACACATGACCTGA	-8.8	1.93	cbiO_CDS
151499	+	14.75	ACAGATATCACTAGGCAGCACTGTCATTCAGGCAGGGAAAAAGAATAAAGA	-5.6	0	cbiO_CDS
152102	+	10.06	GAGATTTAATGAGCCTATGCTCACAATCGAAGATGCCGCTGCCGAAATCCG	-8.8	1.39	cbiO_CDS
152218	+	21.88	GACTTCACTTGTGCACCGGCTTGACCCCAGAACAAAACTGATCACGATCTT	-2.9	8.71	ybaF_CDS
152287	+	20.69	ATTCTTAGCCAATAATGTTCAGACATATGCGTTGCTTGGTTTATTTACAAT	-8.6	37.34	ybaF_CDS
153156	+	21.94	ACGCAGCCGGACAGGTGATTCATTTTGACACTCCGCTGTCTATCCCGGCTG	-15.8	0	truA_CDS
153309	+	50.69	AAAAAGAATATCGCTACTTTGTATACACGGAGAAACACCCGGACGTATTTA	-4.2	0	truA_CDS
153448	+	17.69	TACGAGCTTTTGCGCGGCTAAAACAGAAGTGCAGGACAAGGTAAGAACGAT	-10.8	1.13	truA_CDS
153553	+	10.94	CAGCGGTTTCTTATATAATATGGTCAGAATTATTGCGGGTACTTTGCTTGA	-5.7	0	truA_CDS
153877	+	23.19	TAGGAGGGAAATTCAATGCGTACAACACCTATGGCTAACGCAAGTACTATT	-5.3	0	rplM_CDS
153894	+	10.19	GCGTACAACACCTATGGCTAACGCAAGTACTATTGAACGCAAGTGGTTAGT	-7.8	0	rplM_CDS
153897	+	11.19	TACAACACCTATGGCTAACGCAAGTACTATTGAACGCAAGTGGTTAGTTGT	-7.9	0	rplM_CDS
153964	+	10.5	ACTTTAGGTCGTCTTTCTTCAGAAGTTGCAGCTATCCTTCGCGGAAAACAC	-5	0	rplM_CDS
153993	+	14.81	AGCTATCCTTCGCGGAAAACACAAACCAACTTACACACCACACGTTGATAC	-3	0	rplM_CDS
154107	+	41.06	CAAAATCTACTACCGTCACACTCAACATCCAGGCGGATTAAAATCAAGAAC	-5.4	0	rplM_CDS
154142	+	52.25	GATTAAAATCAAGAACTGCTCTTGAAATGCGTACAAACTACCCTGAGAAAA	-5	0	rplM_CDS
154163	+	11.69	TTGAAATGCGTACAAACTACCCTGAGAAAATGCTTGAGCTTGCTATCAAAG	-2.8	0	rplM_CDS
154176	+	13.19	AAACTACCCTGAGAAAATGCTTGAGCTTGCTATCAAAGGCATGCTTCCAAA	-9	0	rplM_CDS
154401	+	27.38	CGTGTGCGTTTAGTTCCAGGAGAAGGCCGTATCGTCGTTAATAATCGTGAA	-4.8	1.8	rpsI_CDS
154420	+	36.25	GAGAAGGCCGTATCGTCGTTAATAATCGTGAAATCAGCGAACATATCCCAT	-4.3	15.05	rpsI_CDS
154447	+	40.44	GTGAAATCAGCGAACATATCCCATCTGCAGCTTTAATCGAAGATATCAAAC	-3.7	10.38	rpsI_CDS
154558	+	10.69	GCGGCCTATCTGGTCAAGCTGGAGCAATCCGTCACGGTATCGCTCGTGCTT	-18.9	0	rpsI_CDS
154589	+	41.06	TCACGGTATCGCTCGTGCTTTGCTTGAAGCAGATCCAGAATACCGTACAAC	-14.4	6.14	rpsI_CDS
154641	+	10	CTTAAACGTGCAGGTCTTCTGACTCGTGACGCTCGTATGAAAGAACGTAAA	-9.3	16.89	rpsI_CDS
154741	+	378.31	AATTTTACGTTTTCAAAAAGCTCTCGACCTTGGGTTGGGAGCTTTTTTCTT	-20.1	43.97	rpsI+49
155958	+	106.38	AAGCGTGAAAGTATGAAAAGCAGCGACCTGTTAGAGGGGCTGCTTTTTTCA	-17.3	48.1	ybaJ+35
158520	+	545.06	GCAGGTATAAAAGGTGAACCGGGATTCCAGATCCCGGCTTTCCCTTTATTC	-18.4	18.52	salA+41
158830	+	19.13	GCAAAATCAGTGTCTTCAAAGATGTTTTTCCAAAATTCTTCACCTTTTTTA	-1	0.79	salA+351
160117	+	18	TTGGCCGGTAGGGGGTCTTAATAGCTGTATGTCTTTGACCCCTAACTTTTC	-14.5	0	kbaA+339
160818	+	88.81	TGTTATAGTAATAAAGCTGCTTCGTTAAGCGGCAGTAATGATCTTTGAAAA	-9.4	41.82	kbaA+1040
160893	+	19.44	TAATTCATTTTTATAAATCGCACAGCGATGTGCGTAGTCAGTCAAACTACT	-10.4	69.23	kbaA+1115
162511	+	65.5	ATATAAGACCTTGGGTCTTATAAACAGAACGTTCCCTGTCTTGTTTAGTTT	-13.6	50	kbaA+2733
165533	+	17.56	AGTGTGGCGACACATGGAGCTGACAGATACTAATCGATCGAGGACTTAACC	-8.8	93.33	kbaA+5755
165863	+	58.5	CCTACCTGCGGAGCATTGCTTCCATAGCTCAGCAGGTAGAGCACTTCCATG	-21.1	5.64	kbaA+6085
165903	+	1864.63	GCACTTCCATGGTAAGGAAGAGGTCAGCGGTTCGAGCCCGCTTGGAAGCTT	-14.1	27.41	kbaA+6125
165948	+	17.44	AAGCTTAAATGTATTATTACCAAGGTTTCTCATAAGGAGAAAGCTTTTTTT	-10.4	4.78	kbaA+6170
166033	+	2109.13	ACCACCTTGCCAAGGTGGGGGTCGCGGGTTCGAATCCCGTCTTCCGCTCCA	-20.3	11.6	kbaA+6255
166141	+	229.63	TTTGACTACGGATCAAAAGGTTAGGGGTTCGACTCCTCTCGGGCGCGCCAT	-9.9	1.41	kbaA+6363
166240	+	44.38	GAGCACATGGTTTGGGACCATGGGGTCGCAGGTTCGAATCCTGTCTTCCCG	-18.7	0	kbaA+6462
166329	+	1886.25	CCTGCTTTGCACGCAGGAGGTCAGCGGTTCGATCCCGCTAGGCTCCACCAA	-19.3	27.91	kbaA+6551
166423	+	153.56	ATACTAATAAAGTTGCTTTAACAAAGCGGACAAACAAAATGATCTTTGAAA	-4.7	38.85	kbaA+6645
166477	+	12.75	AAACAAGACAAAACGTACCTGTTAATTCAGTTTTTAAAAATCGCACAGCGA	-4	22.86	kbaA+6699
166498	+	23.75	TTAATTCAGTTTTTAAAAATCGCACAGCGATGTGCGTAGTCAGTCAAACTA	-10.4	34.78	kbaA+6720
168119	+	74.13	ATATAAGACCTTGGGTCTTATAAACAGAACGTTCCCTGTCTTGTTTAGTTT	-13.6	27.27	kbaA+8341
168219	+	17.88	GACATCACATTCAAGTAATACAAGATATCACATAGTGATTCTTTTTAACGG	-5	0	kbaA+8441
171139	+	23.81	AGTGTGGCGACACATGGAGCTGACAGATACTAATCGATCGAGGACTTAACC	-8.8	88.89	kbaA+11361
171453	+	11.88	AACAAAATGATCTTTGAAAACTAAACAAGACAAAACGTACCTGTTAATTCA	-0.9	6.06	kbaA+11675
173115	+	75.38	ATATAAGACCTTGGGTCTTATAAACAGAACGTTCCCTGTCTTGTTTAGTTT	-13.6	0	kbaA+13337
173215	+	11.44	GACATCACATTCAAGTAATACAAGATATCACATAGTGATTCTTTTTAACGG	-5	0	kbaA+13437
176139	+	21.31	AGTGTGGCGACACATGGAGCTGACAGATACTAATCGATCGAGGACTTAACC	-8.8	92.31	kbaA+16361
176196	-	14.06	TCCGTGTTCGGTATGGGAACGGGTGTGACCTCTTCGCTATCGCCACCAAAC	-11.5	100	ybbA+3399
178559	+	63.69	AGATGGCATAAAATAGAGAAGCCCAGATGAATGAGATCTGGGCTTTTTTAT	-22.2	51.35	ybaR+40
179306	+	11.19	AACAGTTCAGCGATTGCTCCTTATTTCAAATCCATTGATTTGAGATTTGCA	-10.3	0	ybaS_CDS
179619	+	44.06	TGTTGCAGAAGGCATAAAAAAACCGCTCATAGGGTTGAGCGGTTTTTTCCG	-19.9	4.84	ybaS+34
182175	+	14.44	GAAACAGCAAGGGCTGCCCCTATGAGCAGAGCGCCGGCAGCCCTTGGAATC	-22.1	29.31	ybaS+2590
194280	+	13456.8	ACCGCCCTTTCACGGCGGTAACACGGGTTCGAATCCCGTACGGGTCACCAT	-18.9	14.64	ybaS+14695
194361	+	2900.75	TGCCTTACAAGCAGAGGGTCGGCGGTTCGAGCCCGTCATCCTCCACCATCT	-16.1	29.86	ybaS+14776
194395	+	32.25	GTCATCCTCCACCATCTTGCCGGTGTAGCTCAATTGGTAGAGCAACTGACT	-10.9	0	ybaS+14810
194445	+	1596.75	TTGTAATCAGTAGGTTGGGGGTTCAAGTCCTCTTGCCGGCACTGTTTTTTC	-13	10.59	ybaS+14860
194543	+	5329.88	TAAATCCGCTCCCTCAGGGTTCGGCAGTTCGAATCTGCCCCCCTCCACCAT	-13	10.15	ybaS+14958
194619	+	1655.88	GCAACGGACTTTGACTCCGTCATGCGTTGGTTCGAATCCAGCTAGCCCAGT	-12.7	40.77	ybaS+15034
194654	+	3674.75	ATCCAGCTAGCCCAGTCACAGACACCTTTGATCAAAAGGTGTCTTTTTTCT	-14.1	91.7	ybaS+15069
195741	+	20.38	TTATCGCAGCTGCTGCGGTATTCATCATTTTGATGGGCGGGGGTTTTTTTA	-14.4	0	rsiW_CDS
196081	+	409.44	CAATCCGAACGGAGAAGAGTAAAGCGCGTTAGCCGCTTTGCTCTTTTTTTG	-22.1	67.05	rsiW+29
196735	+	14.13	TGCTGATCAATATTTTTATTCCAAACACCCCGCTTCATGACGGTGCGGTAA	-6.3	7.26	ybbP_CDS
196772	+	13.69	TGACGGTGCGGTAATTATGAAAAATAATGAAATTGCCGCGGCCGCCTGTTA	-16.4	3.14	ybbP_CDS
197166	+	12.88	AGCACCGACTCCAAAAAAACCGGGTGAATCTTTCTTTCCGACATCAACAAC	-5.2	0.54	ybbR_CDS
197535	+	21.69	CAAGATGAAAAAAGGCTATTCTCCGGAGCAGCCGATTGTCAGTCCGAAAAA	-11	0	ybbR_CDS
197770	+	12.13	AGCCCGAGTAAAAAAGTGCCCTTTAAAATTGAACGGACAGGAAGCCTTCCT	-5.4	0	ybbR_CDS
197853	+	38.88	CCCCAGTGAGGTAACGGTTTACGGCTCACAGGATGTGTTGGATTCTCTTGA	-8.9	0	ybbR_CDS
198723	+	10.13	CCTTGTCGCCGGACTTTTATCCATTGGCGCAGAAGTCATGCGCCTGGGTGT	-18.5	0	glmM_CDS
199982	+	258.94	TGACCGTTTATGCCACATGTTGTAAAATCAAGCTTGTCTTGTTCTTATTTT	-2.3	25	glmM+139
200197	+	16.69	AAGGGGGTGACTCCTTGAACAAAGAGAAATCACATGATCTTCCAAAAAACA	-7.8	1.38	glmM+354
200209	+	16.31	CCTTGAACAAAGAGAAATCACATGATCTTCCAAAAAACATGTAGGAGGGGA	-5.3	0.38	glmM+366
200231	+	73.44	TGATCTTCCAAAAAACATGTAGGAGGGGACGATTGAAAGTCCCCTTGAAAT	-15	0	glmM+388
200261	+	158.56	GATTGAAAGTCCCCTTGAAATTTGACTTTCTTCGTCTCCTTTTACAATCTT	-7	0	glmM+418
200325	+	11.38	ATATGTGTGGAATCGTAGGTTATATCGGTCAGCTTGATGCGAAGGAAATTT	-3.5	0	glmS_CDS
200561	+	10.06	CCAAGCTATCTGAACGCTCACCCGCATCAAAGCGCACTGGGCCGCTTTACA	-9.4	0	glmS_CDS
200591	+	29	AGCGCACTGGGCCGCTTTACACTTGTTCACAACGGCGTGATCGAGAACTAT	-12	1.2	glmS_CDS
200765	+	36.5	AAAACACTTACACTGTTAAAAGGCTCTTATGCAATTGCTTTATTCGATAAC	-2.9	0	glmS_CDS
200969	+	14.56	ACTGATGACCAAGTTGTCATCAAAAACCTTGATGGTGACGTGATTACACGT	-16.8	14.96	glmS_CDS
201160	+	16.81	TGTGCCTGGCGATATCGCTGCCGCTGTAGCGGAAGCGGACCGCATCTATAT	-16.9	0	glmS_CDS
201216	+	37.31	GCTGCGGAACAAGCTACCATGCAGGACTTGTCGGTAAACAATATATTGAAA	-8.5	28.04	glmS_CDS
201429	+	16.63	TGACAATCACAAACGTACCTGGATCAACGCTTTCTCGTGAAGCTGACTATA	-5.1	0	glmS_CDS
201600	+	29.75	GATTTGACCTCGTCAAAGAACTCGGTATCGCTGCAAACGCAATGGAAGCTC	-7.4	1.42	glmS_CDS
202083	-	40.75	TTGGACATAAAAACACCCCTTTAGATAATCTTATCCAAAGGGGTTAAACAT	-14.6	46.88	alkA+464
202126	+	1263.5	GTAATAAATGTTTAACCCCTTTGGATAAGATTATCTAAAGGGGTGTTTTTA	-19.4	94.34	glmS+47
205301	+	422.06	TTCAATGATCTAACATAATCATTGAAATTTTGAAGTTGTCGGCTTTTTTGT	-9.9	99.19	adaB+411
211158	+	21.06	TCCTGTCGAAAGATCTAACATCCGCTGTTGTTATGAGCGGATGTTTTTTTA	-15.5	11.76	ybcI+212
211761	+	85	TTTCTTAAAACAGAGATATAAAAATAAACATCAAAAGATGTTTATTTTTAC	-14.1	100	ybzH+30
212990	+	25.81	TTGGTGCGTTAGGGGTTATGATTGCAATTATTGCATCATTGCTGATTTTCA	-9.8	33.33	ybcL_CDS
214158	+	57	ACATTTGAGAATAGGGAGTTGAGCGTATTTGCTTATACTCCTTATTTTCTC	-23.2	58	skfA+50
223221	+	93.44	AGTTAATCCAAAAAAAGTTCTTGTTCCGCTTTTGGGACAAGGGTTTTTTTA	-15.8	60.22	ybzI_CDS
224043	-	13.56	CGTGACAAAGCAGTTTTAACTTATACCGAGCCGGTTATCCGGCTCTTTTTT	-14.3	71.43	ybdN+32
226280	+	103.19	AACGGGTGTGAATTATTAGGTAAGCTGTTCATGTAGGACAGCTTATTTTTT	-15.2	76.92	ybdO+32
227993	+	38.63	GCAGCTGAATAACGATAAAAAAGAGACATTCACGGATGTCTCTTTTTTTAT	-14.8	100	ybxG+39
228516	-	21.88	GGCCTGATTACATCCTAAATAAAAGAGCCCTGCACGGCAGGGCTCTAAATC	-19.3	70	ybxI+33
230779	-	15.19	AAAAGAAGTAATCAAAAAGCTCTCTTCGATAAAGGAAGAGAGCTTTTTAAT	-20.2	100	ybyB+40
231634	+	22	ACACGGTTCGTTTATCGGTTTTATTGCGGGCTGGGCCAACTGGATTGCGAT	-10.4	0	ybeC_CDS
231941	+	24.5	GTCGGATTCCACGGAGAAAACTTTACTGGCGGTCAAAGCATTGCGCCGAAT	-8.1	0	ybeC_CDS
231993	+	10.06	GCTGGGCAAGTGTGCTGACGGCGGTTGCCACTTCCGGTATCGTTTTTGCGT	-15.3	0.48	ybeC_CDS
232017	+	14.19	TTGCCACTTCCGGTATCGTTTTTGCGTTTAATGGTTTCCAAAGCCCGATTA	-7.8	2.96	ybeC_CDS
232318	+	27.56	GGGGATTACGTATACGGCGACAACGTCCCGAATGATTTACGGAATGGAAAA	-7.3	0	ybeC_CDS
232384	+	34.25	GAGTATATTCGGGAAGCTTCATCCGATTTACGGCGTTCCGCGACAAGCAAT	-10.4	0	ybeC_CDS
232456	+	19.38	GTTCATCTTTTTGTTCCTGTTCAGAGGATGGGGCGTATTAGCGGAAATTAT	-10.6	0.03	ybeC_CDS
232758	+	11.19	GCCGGAACTTTAAAGCCGGCGTCTGGATGGTGTTTTATCTGCTGGCCATGA	-13.1	3.6	ybeC_CDS
232807	+	11.75	GATGGTTATTTCTTATTTGGGCAGTGATAAATTCGGCGGCCTGAATGTCAT	-11.1	0	ybeC_CDS
232971	+	34.25	CTCAGCTGCTTAATGGACAGTCAGAAGCTGCTGCCGGAAAAGAATAAAATA	-9.8	23.5	ybeC+4
232974	-	68.81	AGGGTTATTAAAAGCAAAAAACCTTGCGACAACTATCGCAAGGTTTTCTTC	-16.4	64.52	glpQ+40
232992	+	28.75	CAGAAGCTGCTGCCGGAAAAGAATAAAATATAGAAGAAAACCTTGCGATAG	-1.9	31.06	ybeC+25
233012	+	1905.38	GAATAAAATATAGAAGAAAACCTTGCGATAGTTGTCGCAAGGTTTTTTGCT	-20.1	95.45	ybeC+45
235389	-	81.25	AGCCAGGAATCCAACCCCTTTTGACAAGGGGTGTTTTCTGGCTCTTTTTGT	-22.8	7.39	ybfE+2775
238137	-	25.38	TACAAAAAAAGCATCTCTGAATAATCTCGAAATCAGAGATGCTTTCCCTTT	-17.8	54.55	ybfE+27
239588	-	12.88	ATACAAAACTGCATGAACATAAGTTAAAATATGCTCATGCAGTTTTTTTAG	-18.4	18.18	ybfG+56
241900	-	12	GCTGTTGGAGAACGGATGTAAAATGGATGCTTAACGGCATCCATTTTTTTA	-18.6	37.5	ybfH+17
245087	+	288.25	TTTAAAATAGAGTTTGAACAGGTCTTGTCATGGGACAAGGCCTGTTTTTTT	-21.4	91.67	purT+41
246526	+	149.13	TAGTCTTCAAAGAATAGCAGTTTCCTTGATTTTAAGGGAACTGCCTTTTTT	-18.4	48.53	ybfJ+34
246901	+	11.06	TCAGCTCTGCGATGTGGTATCCGAATATCGCAGCGTGGAGCAGTCAATTTC	-21	1.6	ybfK_CDS
247135	+	12.88	CTGAAAGAGTAGAGCGGGCGGTTGTTATCAGTCCCGCTGAAGCGTTTATTT	-12.3	0	ybfK_CDS
248458	+	12.94	GAATTATGAGCTTTCGATATTGATTAGTTTTGTCGGGGCTTTGTTAGGTAT	-9.5	0	ybfM_CDS
248702	+	13	AAAATGGATCTGAAAACGTATGTTGCGTTTGCTGCAATCGGCGCCTTTTTA	-9.2	0	ybfM_CDS
249578	+	153	TTACGAAGAATAAAAAGAGGAGCTTGCATAAACGCAGCGCCTCTTTTTTTG	-17.3	16.18	psd+38
249902	+	60.94	GGTGATGAGAGAATCCAGCTAAAGCTTCTTTCAACAGAGAAGCTTTTTTTT	-13.4	69.05	ybfN+29
253517	+	30	CGCTGCTGCTGAATAAAAAAAGAACACCTCGTATTGAGGTGTTCTTTTTTT	-21.9	86.96	ybfQ+35
254875	-	265.06	GCACATTCAAATGAAGTAAAAAAGTCCCCCCTGCTGCGGGGGACTTTTTCG	-20.3	90.48	nagP+32
255727	-	29.38	CGGACTGTCTACAAACGGCTGGGTTGTCATTCCTGTCGGGATCGTGTTTGC	-12.2	0.71	nagP_CDS
258842	+	92.5	TTGTTTAGCGCTCTAAATCAAACAGCCAGAATAAAACTGGCTGTTTTCTTT	-17.5	68.42	ybgB+35
260090	-	36.69	ATGACTCATTCAAAATAAAAAGAACCTGCCTCCGGGCAGGTTCTTTTTCGA	-22.7	85.71	ybgF+33
260192	-	15.75	GATCCGAATCAAAGAATCGCACTCTATTGCGGCGTTCCATTTATGGCCATT	-5.2	33.24	ybgF_CDS
260924	-	19	GCCGCTCCGATGCTGTCCAACTTCACGGCGGAAGGCGGGCTTTTTCCCAAT	-15.1	0	ybgF_CDS
261043	-	23.63	TCAAGTTTTTCGCTGAATCAGAATTTTGGTTTTCCAGCATCAAAGTATTAG	-7	34.14	ybgF_CDS
261180	-	14.63	GCTGACATGGACCGTGGCATTGGGATCAGAATTCACAGCAGCCGGCCTGTT	-12.7	0	ybgF_CDS
261468	-	17.88	CAAGAATGAGACAACCTTTCAGAGAAGTATGAAAAGCCGGCACCTCTTTAT	-4.2	0	ybgF_CDS
261515	-	89	AATAAATCGCTGATAGAAAGTTGGAAAAAGATGAACTCTGCCCACAACAAG	-4.8	0	ybgF_CDS
261577	-	89.63	TTAAAGCCGGTTCGCCGGAGTCTCGTGTCACTTTCTGACATGAGATTTTTT	-21.9	0	mmuM+79
267697	+	29.38	AACAAAGAAGGATATAAACCAAACAGCCGGCTGACCAGGCTGTTTTTTTGC	-13	34.48	glnL+34
273982	+	53.69	AAAATAATGGTGAGCAACCGCAGTTGAAACGTAAGAGCTGCGGTTTTTTTA	-14.6	16.92	ycbG+44
275780	+	14.88	AGCCCTTATATGGTTATCAAAAAAGAGGGTGGCGTGCCTGCCCTTTTTTGT	-14.6	0	garD+219
277081	+	222.94	AAAGGTGGTACCGCGAGACCCTCGTCCTTTGCATAGGACGGGGGTTTTTTG	-25.3	95.1	ycbJ+323
281770	+	46.38	GGCGCCCAATATGTATAAAAGGCCGATGCTGTCAGCACCGGCCTTTCCATT	-17	35.29	ycbO+56
283782	+	28.25	TAACTGATAAAGAGCACTGAGTCATTCTGCGAAATGGCTCGGTGTTTTTGT	-21.7	53.13	ycbR+48
285990	-	23.31	AGCCCTCCCTTTCATAAAAAAAGAGGCAGACCCGGTGTCTGCCTCATCAGC	-16.8	59.09	pcp+783
286025	+	10.94	AAACGCGGGCTGAATGCTGATGAGGCAGACACCGGGTCTGCCTCTTTTTTT	-19.1	10	tatAD+38
288614	-	20.94	GTAGATCATTAATATGAAAAGCCCCTGACTAGTGTTCAGGGGCTTTTTCAT	-22.4	80	lmrB+39
290136	-	45.81	CAGTACGCCGCTCCTTCATATCTCCAGCTGCATTCCTGACCTGCTGAAGAG	-6.4	9.91	lmrA_CDS
292888	+	23.13	AATTAATGAAAAACAAAACCTTGAAGAATGCTATTCTTCAAGGTTATTCTG	-15.9	21.92	estA+45
294576	-	49.81	TTTCAGAAATAAAAAAACCTTGAAAAGCCTGGCTTTTCAAGGTTTTTTCCA	-20.5	64.29	natK+39
294618	+	169.75	CCTCATAATGGAAAAAACCTTGAAAAGCCAGGCTTTTCAAGGTTTTTTTAT	-22.2	92.31	yccF+43
299395	-	24.19	AAGAATAAAACACCAAAAGGAAATAGCCATGACGGCTATTTCCTTTTTTAT	-19.4	100	ycdA+43
302382	+	12	CAATAATAGAAAAGGACCTTTCTTCACTTTAAATGAAGAAAGGTCTTTTTA	-21.8	100	ycdB+134
304596	-	18.06	TGTCTTTCACCGGCATCAGCTTATCAAGCATGATTCGATGCCGGAATTCCA	-15.4	40	yceB+6284
304675	+	14.38	AAGCTGATGCCGGTGAAAGACAGCGATACCAAGCCTCCGTTCTCTGATATG	-7.9	0	rapJ_CDS
305587	+	108.31	CAGCGTTTTCAATAGGAAATGGCAGAGAACTACAGGTTCTCTGCTTTTTTT	-20.4	75.56	rapJ+36
307855	-	17.75	AGCTCCCTTTCATGAGGTCAGCGTACTGCTTTCTCAGGCTGATCAGCTTTT	-10.7	38.46	yceB+3025
309278	+	12	GTATATCGACATTATGAAACAAAACCTCGATGCCCTGAAAGATTCACTATT	-2.8	19.3	adcA_CDS
309327	+	408.94	TTGGTTAAATCATAAGATAGTGTGCGCCGGAGGGGTGCACACTATTTCTTT	-22.5	26.84	adcA+36
310002	+	32.38	GCAATTTTTAGATAAAGTGATTCGATTAGAGAGAGGAGAAAAAGGCGGATG	-1.7	17.86	adcB_CDS
310843	-	13.19	AATTGTTTCTATAAAAAAAGCAGTTTTCCCTAGGGAAAACTGCTTTTCATG	-19.9	20	yceB+37
310883	+	122.19	AAGCCGATAACATGAAAAGCAGTTTTCCCTAGGGAAAACTGCTTTTTTTAT	-20.6	87.5	adcB+41
313642	+	35	ACCTTGAACATCCGAGCGGCGGTGTCATCCATACGGGTGACAACCGCACGG	-25	0	yceE_CDS
314026	+	12.63	CGAGTGACAAATAGAGAAGTCACCGTTTCAAATTATAGGAGGAAAAAACTT	-7.4	12.55	yceF_CDS
314230	+	11.75	GGTCATGGTTAAACACCTGCCGGAAAAACAGCGGAAAAAAGCGTTAACGTA	-7.4	0	yceF_CDS
314241	+	11.88	AACACCTGCCGGAAAAACAGCGGAAAAAAGCGTTAACGTATGGTTTGTTTG	-6.7	11.69	yceF_CDS
314552	+	10.69	GTATCTGAAAAAGTATGGGTGCTTCTGATTGGCGGTATGCTTGGTATTTTA	-8.5	3.27	yceF_CDS
314840	+	341.25	GAAGAATAAAACAAAACAAGGAGGGAGGTTCAATGTCCTTCCTTTTTTGTT	-18.1	0	yceF+42
316172	+	11	CCGCGGCTTAAAGCCTTGCATCAGGAACAAGTCAAGGATGTTCAAATCTAT	-8.4	0	yceG_CDS
317641	+	935.38	ATTGCAGCAATAATAAAAACCCCGCTTGTGGAACATAAGCGGGGTATTTCA	-20.5	38.09	yceH+38
317866	+	11.06	CGTTTATTATCGCCGCGCTCCATGTAGAGTGGAATCTGTCGCCCGAAGAAA	-8.3	0	yceI_CDS
318960	+	46	CAAACTGAGCTAGAATAGGAAAAGCACCTCTTAAAAGAGGTGCTTTCAGCG	-17.6	0.55	yceI+33
319181	+	262.94	GAAAAGATTTTGTCAACAATCTGAGGCACCTCTTGAATGAGGTGCTTTTTT	-18.3	25.2	yceI+254
320405	-	275.56	AAACATACCTGCCTGGCTTTTTGGAAACCCTCTAACAAAGGGTTTTCTCTA	-11.7	96.46	yceK+16
321203	+	82.88	TGGGGTTAATCAGGCAGATTTTGAAGTATATGATGGTGAGATATTTGTCAT	-6.1	2.2	opuAA_CDS
321302	+	42.63	CCGGCTTATTGAACCGACTGCCGGAAATATTTACATTGATGGTGACATGAT	-9.5	0	opuAA_CDS
321807	+	11.5	GTTCAAATCGGCACGCCTGAAGAAATCCTGATGAATCCATCTAACGAATAT	-4.5	0	opuAA_CDS
321986	+	17.38	AATTTCTTCAATTTATGCAGTGGATAAACAAAAGAAATTATTAGGTGTTAT	-5.7	0	opuAA_CDS
322428	+	26.13	CGCTTTTGTAAATGGAATTGTCACCGGTCTTGGATTTATTCCATCTATTTT	-8.2	0	opuAB_CDS
323164	+	26.06	GCCTGATGCTTAAAAAAATCATAGGCATCGGCGTTTCCGCCATGCTGGCGC	-19.9	0	opuAC_CDS
323291	+	14.88	GATTGACCCCGGTTCAGGGATTATGTCCCTGACTGACAAAGCGATGAAGGA	-15	0	opuAC_CDS
323508	+	13.69	TATGGCAGCGCAGAGGAAATCCATACGATCACACGCAAAGGCTTCAGCAAA	-4.4	0	opuAC_CDS
323547	+	16.31	GGCTTCAGCAAAGAGCAGCCGAATGCCGCAAAGCTTCTGAGCCAGTTTAAA	-13.2	1.97	opuAC_CDS
324000	-	81.38	TAACGCTTCTTAACGCAAAAAAAGCAGCCTGACACAGGCTGCTTTTTTGAT	-22.2	86.84	amhX+38
324036	+	423.5	GATTTGAAGAAGTAATCAAAAAAGCAGCCTGTGTCAGGCTGCTTTTTTTGC	-20.4	93.91	opuAC+36
326808	+	123.63	TGGGGGCCGTTTTAACGATTGCTGCCCGCCGGCTTGTACGGCGGGCTTTTG	-21.4	42.31	ycgA+36
327517	-	138.44	TCCCTCTTACTTCATTCTTCCGCTTCCTCCTTTCAAACCGATGTGAAGACT	-5.3	32.47	mdr+4924
327541	-	47	GAAGACTTACTTCGGAGTCAAAAATCCCTCTTACTTCATTCTTCCGCTTCC	-5.3	16.81	mdr+4900
327688	-	54.44	CATTCGATTTGTTCGCCGTTTCAGCACTCGCAGCCGCCGGTCCTGCCAGAA	-6.2	6.05	mdr+4753
327829	-	33.88	CCTTTACTTGGTTAATCGGAGATGTCTGAATGGCTGTATATCCTGCATCAT	-8.5	8.83	mdr+4612
327856	-	20.56	ACATGCTTTTATCTCCTTGATTCCCTTCCTTTACTTGGTTAATCGGAGATG	-9.4	2.07	mdr+4585
327867	-	20.44	GTACCAGTTCGACATGCTTTTATCTCCTTGATTCCCTTCCTTTACTTGGTT	-3.5	0	mdr+4574
327896	-	348.94	ATTTGATACGATGTCGGCTGATACAGCCAGTACCAGTTCGACATGCTTTTA	-13.8	5.93	mdr+4545
329654	+	128.88	GGCTAGACGGGACTTACCGAAAGAAACCATCAATGATGGTTTCTTTTTTGT	-18.5	64.49	amyE+57
332397	-	219.19	AAATTAACATAAAAAAAGCAGTACATGCTGGGCATGTACTGCTTTTTTCTA	-23.4	95.89	mdr+44
333763	-	10.13	ATATGGTGGCGGTTATGGCTGGCATGCCGATTTACGGCAAGCTTTCCGATA	-14	0.3	mdr_CDS
336132	+	35.56	ATGAAATAAATCAAGGACTGGCAGGGCGATCTTTATGACCCTGCTTTTTTT	-12.3	10.34	ycgG+42
339109	-	16.38	ATAAAGCTTCTGTACACGACAAAAGCCCGCTCCGAGAGCGGGCTTTCTTCA	-20.8	53.85	tmrB+47
339143	+	281.25	ACTGGTGGAAATAAGTTGAAGAAAGCCCGCTCTCGGAGCGGGCTTTTGTCG	-23.6	87.21	nadE+37
340581	-	13.25	ACAAGGGATAAAACGATAAAAAAAGCCGTGCGCTGCGCACGGCTTTTTACA	-20	50	ycgJ+32
340615	+	52.5	GATCTTTATCAGCCGATGTAAAAAGCCGTGCGCAGCGCACGGCTTTTTTTA	-21.7	84.09	aroK+30
343537	+	28.69	AAGGCTGATAAATGTGAAAAGCCGCCGCATATCATCAGGCGGTTTTTTTCT	-15.2	6.03	cah+43
344386	+	26.81	AGTGTGGAAGGATGGAGGAAGCTGATGTTTTTTGTCGCTTCCTTTTCTCCT	-18	9.78	ycgL+26
347072	+	105	TCTAAGCGGGACTAAATGGGCATCCTCCCTGCGGGGGTGTCCATTTCATCC	-23.1	0	ycgN+46
347365	+	17.69	CTGAGCGGCGCTTGGATCGTCATCGGACTTTGCCTTGGAGCGTGGGCGAAC	-14.7	8.38	ycgO_CDS
347814	+	10.81	AGATCCTGATATGTTTAATATTTTCAAAGGAACGAGCGTCCTTGGCATTAT	-6.6	0	ycgO_CDS
348382	+	74.94	GTACTGCTCAGTCTGTTTTGGAAACGAATGACCAAATGGGGGGCACTCGCC	-9.9	0.51	ycgO_CDS
348619	+	58.25	TAAAGATCGAAAGGAGGAGGAAGGGGCTGTCCCTTTTTCCTCTTTTCTCCT	-28.3	23.13	ycgO+48
349958	-	35.81	CAGAGGATTTTAAGTGAAGACGAAACCAGTACAAGTACTGGTTTCTTTTTT	-14.5	90.91	ycgQ+38
349995	+	83	ATGAAAAAGAAATAAAAAAGAAACCAGTACTTGTACTGGTTTCGTCTTCAC	-13.6	54.84	ycgP+36
351743	-	14.13	TTTTTTCTGGTATCATAAGAAAGGCAGCTTAACATGAGCGGAGGTTTTATT	-6.3	0	ycgS+99
353865	-	153.13	ACTCCTTCACACCTGATGGCAAGCAGCCCTTTTCCTCAAGGGCTGTTTTAT	-19.8	79.55	nasF+35
355309	+	10.63	TTCCTTGAGCGCCTGTTTTCCTTTGATGGTGAGCAGGCCTGGGTCGCCGGG	-21.3	5.04	ycgT+1441
355649	+	10.56	ATGGCGCGGATGCTTCCGTCTGAAAGCTTGAAAACCGCGAGCTCCTTATCT	-12.4	29.17	ycgT+1781
367254	-	22.19	ACAAACGTTTCATTAAAAAAAGCCGTTCCCCATGGGACGGCTTTTTTTCTA	-20.1	100	yckA+51
369709	+	56.25	AATGCTGACGAAGAGATTAGAAAGAGCGAATAATGGTTCGCTCTTTTTATT	-17.4	53.33	yckC+18
371691	-	368.88	TGTTTCTGTGTAATGAAAAACCCCTGAGAGAATAACTCTCAGGGACTCTTT	-17.8	65.19	nin+38
371728	+	30	GGAGAAAGTTTATAAAGAGTCCCTGAGAGTTATTCTCTCAGGGGTTTTTCA	-19.5	54.55	bglC+36
373119	+	14.38	TCTCTGGTGCGCTGGATCATGGTGACTCCTTCTGCAGCTTCTGTTTTCACA	-6.6	3.28	bglC+1427
374565	-	73.31	AAACCTTGAATAGCATCACACAACCGGCCTGAAGATCAGGCCGGTTTTATT	-19.6	92.31	hxlB+38
403153	+	107.25	TCATTCAACCGTGATCAAAAGCGGACAGCTTCGGCTGTTCCGCTTTTTTTG	-19.8	85	srfAD+37
403721	+	13.44	CGCCCATTTGGGCTGCGGCTCCGTATCATGCCGGCTGGCAGAGCACCTATA	-16.6	9.45	ycxA_CDS
403763	+	13.25	GCACCTATACCATTTTGGGAATCGTCATGGCGGCTGTTCTGCTGCCGCTCC	-15.2	0	ycxA_CDS
404438	-	43.69	AAAACTCAAATTTAAAAAGGATCAGCATTGACAGTGCTGATCCTTTTATAT	-20.3	60	ycxB+20
404474	+	93.63	AAACCCACCATTCAATATAAAAGGATCAGCACTGTCAATGCTGATCCTTTT	-17.5	68.09	ycxA+31
407285	-	51.06	ACCCCTTGTTTTTCCAGTCTATGAATCACTCTTGAGGCGGGCAGATCCTGA	-7.1	10.95	yczE+955
408211	-	249.25	AGCATCTCCGCCTGTACACTAAAACAAAGCCGCCTTGGCTTTGTTTTTTTA	-13.9	46.7	yczE+29
408973	-	120.13	AGGGTTTGCCAACACGCTGAAACAGGGCGCCTCCGGCGGCCCTGTTTTTTT	-21.8	33.33	tcyC+235
409128	-	238.63	TCAGATTATTGACAAAATCCTAAAACGATATTCGTTTTAGGATTTTGTGAT	-21.7	26.52	tcyC+80
409168	-	13.88	ACCCGCTGTAATAAGAAAAACAGAGCGTCAGCGCCCTGTTTCAGATTATTG	-11	15.22	tcyC+40
410426	-	37.5	GATGGGTGTTCAGCGTATACGTATCCGCAATACGCGGCACTCCTCTTCTCG	-15.2	0	tcyB_CDS
410551	-	19.13	ATTCTGGCCGATACTTTCAGGGGGAATCTACTATACGATTCCCCTTACGAT	-15.8	0	tcyB_CDS
410907	-	16.38	ATGCCGGCGCTAAAGTAGAAGGCGTTGAAGGCATGGCGCAGGCCCTTCAAA	-16.3	0	tcyA_CDS
411299	-	13.69	GGCTTCAATTAAGAAAAAAGGTGTGCTCACAGTCGGAACGGAAGGAACATA	-5.7	0	tcyA_CDS
415319	+	16.06	GATTTAAAACGGTAATATCGATAGCCTGACGCCATGCGTCAGGCTTTTTTT	-18.5	100	yclD+36
416234	+	30	CTTGATCAATAAAAAACAGCCCGCAGATCAACATCCGCGGGCTGTTTCTGA	-21.7	14.55	yclE+39
416884	+	12.56	AAGGAACGTAAGCGGCAAGACGGGATTTTTCTGTTTTGTCCGCTTTTTTGC	-20.8	11.11	yclE+689
428710	+	87.56	CAGCAATAGCATACAGGGCGGCGCATCAACTGATGCATCCGCCTTTTTTGC	-20.6	13.1	yclK+42
430087	-	19.25	GTGTTTTTTTGAAAAGAAAAACCCCTTCTCGCTAATGAGAAGGGGCTTGTT	-19.5	50	yczN+269
430124	+	341.81	GGAATGACGTAAGAACAAGCCCCTTCTCATTAGCGAGAAGGGGTTTTTCTT	-23	86.3	phrC+39
430129	-	77.06	CGTAATCTCCATGAAGGCGGCACCGCAAGACTATGTCTTGCGGTGTTTTTT	-22.1	72	yczN+227
430583	-	99.06	TGATCTCTTAATCGTACATAAATAGCGGGCGGCAGCGCCCGCTATTTTTTT	-21.1	19.32	yclM+40
431496	-	56.81	CTCTTTGTGACAAATGAACCCGGCAACGCGCAAGTTCTTCCTGAATCCTAT	-4.6	2.57	yclM_CDS
434080	+	15.19	CGATTATGTTTTTAGGCCTTCTGGTCGTCAACCTGGCGAGAGAATTCCTGA	-13.5	0	yclO_CDS
434383	+	35.5	GGGCAAAATCACCTCGTTTATCGGTCCTAACGGCGCCGGCAAAAGTACGCT	-8.3	3.69	yclP_CDS
435218	+	23.63	AAAAACGGCACAAAAGTACCGAAGAACCCTAAAAAAGTTGTCGTATTTGAC	-5.1	0	yclQ_CDS
435310	+	51	TATAGTAGCGGGCCTGCCGAAACAAGTCCTTCCTAAATATCTGTCCAAATT	-5.4	6.19	yclQ_CDS
435781	+	10.63	TACGCACGGACAAAGTGTTTCTTACGAGTACATTTCAAAAACAAACCCTGA	-3.7	10.74	yclQ_CDS
435991	-	83.75	CGCTGATTAACAAAAAAAGAGCCCCGCTATTTAGCGGAGGCTCTTTTTGGT	-22.9	89.29	ycnB+45
436031	+	408.5	GAAAAGTAAAACCAAAAAGAGCCTCCGCTAAATAGCGGGGCTCTTTTTTTG	-22.4	98.47	yclQ+42
438476	-	84.88	TTGAAAAATAAGCTCTTATTCGGCCTGTCGGATTTTCCGGCAGGCCTTTCA	-22.6	44.78	ycnD+40
440051	+	360.13	ATGTAGACCAGGACCGCTGGTGAATCAATCCCCTGTAACGGGGATTTTTTT	-18.5	95.16	yczG+28
444388	+	35.38	AAAGAATGCACGCTCCTGAGAGCTGCCGGATTTTCCGGCAGCTCTTTTTGT	-24.5	100	gabD+50
446131	-	116.63	GTGCCTAATAAAGAAAGCGATCCAGATGTCATGTCTGGGTCGCTTTTTATG	-23.3	85.42	ycnI+43
446410	-	10.31	TTGTTGCCAAAAACCCTGACAAAGCGGAGGAAGCTGCTTGGGACGCATACC	-9.1	3.79	ycnI_CDS
452773	+	32	AGAAACTTAATCAATAACCGACCACCCGTGACACAATGTCACGGGCTTTTT	-15.2	57.14	mtlD+34
453893	-	11.88	GTAAGGAAATGGACAGGCCGGGGCAGCCATCTGCCACCGGCCTGATTCATC	-29.8	50	yczH+759
453936	+	66.69	AAGCTCTGATGAATCAGGCCGGTGGCAGATGGCTGCCCCGGCCTGTCCATT	-27.9	30.77	ycsA+42
454612	-	16.31	CATTTTTTTAAACGTGCACGGCGCTTTATTATCGGTGCCGTCATGTTCCAT	-18.7	0	yczH+40
454667	-	11.75	ACGCTTTCTATCATAAAAAACGGGGCGGAAAGCCGGCTCCGCACCGTTTCA	-15.9	0	yczH_CDS
454705	+	10.44	AAAAAATGATGATGAAACGGTGCGGAGCCGGCTTTCCGCCCCGTTTTTTAT	-17.4	0.5	sipU+113
454874	-	15.31	TCCCGGATACGCGACTCTCTTCATCACATGCCAGCCTGCCCGGTCCTATTG	-7	0	yczH_CDS
455775	+	317.5	ATATTGAAAAATGAAAAAAACCCTTCACAACATTTTGTGAGGGGTTCTATT	-16.9	69.72	ycsD+37
456852	+	126.63	CCATTGGGTACTATAAAAAAAGAGAGTCCTAAGATGGACTCTCTTTTTTAG	-20.7	98	ycsE+35
457884	+	10.63	AGGAAAAAAAGCGGGCAGCTGGTCATTGCTGATGGGCGCCGCCTTTTTAAT	-18.7	0	ycsG_CDS
460027	+	29.19	TATAGAAGAACAGCCATTTCCGGGATTCATTGAATGTATCCCGGCTTTTAC	-13.2	1.48	kipI_CDS
463069	-	99.25	ATATTTCGATCACACATAAAAAACGCGCCTGTCATGAGGCGCGTTTTCTAT	-18.3	30.11	yczJ+427
463104	+	54.5	AGAATTATCAGTTTCATAGAAAACGCGCCTCATGACAGGCGCGTTTTTTAT	-22	90	lipC+32
463446	+	10.31	AAAAAGAAAATGACGGCTCAGGCGCTTTTAATATTTATACCGCCGTTTTTG	-6.7	1.1	yczI_CDS
463603	+	184.38	GGCTTTCCACTCTTGATACTCTGAAGAACCGCGAAAGCCTTCCGTATGGTC	-10.5	12.23	yczI+113
464286	+	15.63	TAAAGTCAGCATGAACACAAATGCCGGCAAAGTCAGCTTCAAGAATACTGC	-7.8	0	pbpC_CDS
466978	+	195.31	GTTACGATATTCCATAAAAAGCATCAGTTTACCAGCTGATGCTTTTTCAAT	-16.5	55.37	ycsN+34
469255	+	71.5	CATACTGTAAACCTGCATGGCACACGTCAAAAATTTGGCGTGTGTTTTTCT	-18.4	49.33	mtlR+41
470978	+	47.44	ACATTCATAAAAGAAGAAGCCCGTCCACTTTATGTGGCGGGCTTCTTTGCA	-25.9	100	ydaB+41
474253	+	31.31	CACCGGTCTCACTCGAACTATAAAAAATTTGTGTTTTCAGGGGCGATATGT	-6.9	7.14	ydaG+28
474383	+	49.38	ACCGCTTCCCAAGCAGCATAACCAGCTGCCCTTATTCTTTTCCTTCATAAC	-7.5	0	ydaG+158
474460	+	37.69	AAAAGACTTTTTTGTTTTACAATTCACACCGGCGCGGCTTCGGAGCCGCAG	-13.1	0	ydaG+235
474651	+	490.06	ATAGAAAAGAATAAGACAAACCGCCCGGCGTACGCCGGACGGTTTTTTTAT	-19.6	91.95	ydaG+426
475541	-	86.94	ATAAATAAGGAAGCGCAAAAAGGCTGGATCTTTATGATCCAGCCTTTCTTA	-20.6	72.92	ydzA+43
478777	+	88.5	GGTTTGGATAAATAATAAAAAAACCTGTGCCTATCGCACAGGTTTTTTATT	-17.8	68.09	topB+36
485987	+	62.81	GAAAGACAGATACAGAATAAAACAGAGGCGATTTTAGCCTCTGTTTTTTTA	-16.6	100	ydaN+31
486235	+	260.81	TCATATGCCCGAATCCGTCAGCTAACCTCGTAAGCGTTCGTGAGAGGAGAT	-8	47.37	ydaN+279
486294	+	411.81	CCTGTGTTCGATGTTATGGCACAGGGGCATCCGTTTGCCTCTGTGTTTTTT	-19.8	6.82	ydaN+338
487446	+	15.31	TCCCGCAGCTTGCCTTCAACCTGGCGAGAGACCAGTATATGCCGCGAATGT	-10.5	0.96	ydaO_CDS
487685	+	10.81	AAAGGCTGGATCGGAAAAATGCTGATCAACTCCTGCGGCGCTCTGATATCA	-9.6	0	ydaO_CDS
488293	+	252.06	TTTTAAAAAGTAAAGCTCTAGGACCAAGGGAATCACCTTGGTCCTTTTTAG	-18.8	44.55	ydaO+38
490589	+	15.06	GAAACGGTTATTTTAAAAAAACAGGGGCCCTAAGAGCCCTTGTTTTTTTTT	-17.4	85.71	ydaP+35
490681	-	138.75	CAAGGACAAATGCATCTTCCTTTGAAACAAGATGCATTTGTCCTTTTGTCT	-23.7	52.05	ydzK+96
490723	-	11.5	ATTATGAGAAGAGTTCTGTAAGATTTGATAAGAATAAGCATGCAAGGACAA	-5	49.44	ydzK+54
491116	-	320.88	TTGTAGATACGTTTCGATAAAAAAACCGGCTTCTAAAGCCGGTTTTTATTT	-17.2	28.07	mntH+31
494417	+	38.13	AGATGGAATAGCAGAAAGCAGACGGACACCGCGATCCGCCTGCTTTTTTTA	-15.7	91.67	ydbA+40
495701	-	44.94	GGACGCGAGTAAAGAGACAAGCCCAAAACATGATGTTTTGGGCTTTGATTA	-16.3	66.67	ydbD+39
495739	+	43.81	GTTCTGAAGGCATAATCAAAGCCCAAAACATCATGTTTTGGGCTTGTCTCT	-18.1	4.88	ydbC+36
501465	+	492.69	TGAAAACAGCAGTCTGAAAAAAGAACGGCCCATCCATGGGCCGTTTTTTTA	-20.7	78.57	dctP+34
501833	+	10.38	ATTACGTTTCTTTACATGTTGCTGGCTGTGCTGCTTACAGTCGGGGGCTTT	-15	1.23	ydbI_CDS
501881	+	13.19	TTTGTGTTTTATCCGGTCGTCGCGGCGCAGATCCAGCAGCTGGTAAAGCAG	-12.3	0	ydbI_CDS
502218	+	10.81	GAACGTTCGGCAAGGTGCTCGAGGCTCAATTTATCATTGCGCTCGTCAACT	-8.8	0	ydbI_CDS
502685	+	18	AAAATCGAATAATGAGTGTGCCTCGATCTGCCGGCCTGCCTGTTCAGGGCA	-10.2	0	ydbI+54
502884	+	552.88	AACAAATGCTATAATACAAACAGTGCCTAATGTTGGGCACTGTTTATTTTT	-17.5	64.58	ydbI+253
505058	+	413.25	ATGCAAATCCTGTGTAATCGCGCTGTTCCCTTGGGGAACGGCGTGTTTTTC	-21.8	50.24	ydbL+34
505915	+	25.88	GCTGCTTCACATTCCTGCGATTTATCTTGGTGTGGCTCAAGCTGCTCGTGA	-9.1	12.64	ydbM_CDS
506327	+	118.19	GCTGAAGCGTTTGAGTCATAAAAAAAAGAGCCTTACCGGCTCTTTTTATGT	-14.2	18.94	ydbM+30
506486	+	14.38	CTGTTGGTAAGTTTTCACTTTACGCTTCGGCATGCTCCGGCGCCCTCCTGA	-7.8	35.85	ydbM+189
507675	-	244.06	TCAGGCTCTACATGAACATGAACATGAGTGACATCGTGTTCATGTTTTATT	-18.3	52.78	ydbP+78
509353	+	305.38	TACATTCTAATGAAGAAGGACACTGCCGGTAAAAGGGCAGTGTTTTTTCCC	-20.1	3.91	ddl+41
510863	+	53.38	CACTAATGTATGCCGGCCGAAAATTATGTATATCTGGCCGGCTGCGGCTAT	-17.6	1.15	murF+106
510982	+	13.5	TTCTCCGCTGGATTCTTGGGAGCGGATGGAGCAGCAGCCGGCATATTCGAG	-12	0	murF+225
511005	+	54.19	GGATGGAGCAGCAGCCGGCATATTCGAGATGCCGATCTGCTTCTCATCTTA	-21.4	0	murF+248
511294	+	11.13	CAGGCACAAACGATACCGCTCGGACTTTCAAATAAAGACGTCATTGGACAA	-3.4	0	cshA_CDS
511338	+	15.38	TGGACAAGCGCAAACAGGTACAGGTAAAACAGCTGCGTTTGGTATACCCCT	-8.8	1.09	cshA_CDS
511590	+	23.13	ACCTGGACGTCTTCTTGACCACATCAACCGCCGCACCATTCGTTTAAACAA	-2.1	0	cshA_CDS
511821	+	11.69	AGTAAAAGCGAAAGAAATGACGGTTTCTAACATTCAGCAGTTCTATTTGGA	-5.6	0	cshA_CDS
512327	+	15.75	AAGCGTTAGAAGGTCAGCAACAGGTTACTGTTGAACGTCTTCGCACAACAA	-13.4	0	cshA_CDS
512643	+	30.63	AAACGATCGCCGTTCTTCAGGTGACAGACGCCAGAAAAAATCTTACTAATT	-8.5	26.23	cshA+2
512664	+	47.06	TGACAGACGCCAGAAAAAATCTTACTAATTTGATCGATTCAGAGCCCAAAA	-2.2	57.97	cshA+23
512686	+	1239.19	TACTAATTTGATCGATTCAGAGCCCAAAACATGATGTTTTGGGCTTTTTTA	-17.8	91.36	cshA+45
515036	+	215	TAGGATTTTGTCAACAATCTGAAGCGGCGGTTAATACCGCCGCTCTTTTTT	-19.3	69.4	ydbT+272
517292	+	32	ACAATCATCGAAATAACCGCCAAAGGCCAAACATGATTTGGCCTTTTTTTC	-12.3	48.15	ydcC+35
518825	+	14.19	CAGTGAGAGCGTATGTCAGCGAACGAACAACTCGTCACAACCGTGATTTGA	-7.8	3.86	endB_CDS
518993	+	13.25	TTGATTGTGAAACGCGGCGATGTTTATTTTGCTGATTTATCTCCTGTTGTT	-6.9	0	ndoA_CDS
519169	+	23.69	CGTCGAAATCGATGCAAAACGCTACGGTTTTGAAAGAGATTCCGTTATTTT	-10.9	0.46	ndoA_CDS
519330	+	1201.88	TCATTGATTTTTAGACATATTTGCAGGTTGCTCAAATAGAGCAACTTTTTT	-12.1	81.02	ndoA+37
520931	+	23.56	CGGGTTTTCAACGTCTGGAGGACTTGGTGCGGGACTTCCCGGGGTCAAAAG	-14.5	0	rsbT_CDS
523126	+	78.38	AGCGATACGATCCTGTTGTCGGCAAATCGTTTGAAGCTTTTGCAATCCCGA	-7.9	10.98	sigB_CDS
524291	+	120.81	CTGTCCTAAAAAACCAGAAAAAGAAGCTGGACATCCGGCTTCTTTTTTTTG	-19.2	92.31	rsbX+42
525678	+	47.56	GGAACTATTGAAACATGAGTAAAGATACGGGCAGCGCCAGCTGTCTTTTTT	-12	73.91	ydcH+29
526427	+	11.06	ACGAGTATGAAGAGCCAATTGCAAAAGTTGTTCCGCATAGGGTGCTGGCAA	-8.9	2.78	ydcI_CDS
527931	+	91	ATCGCTGTCTATGGTAAAATAAAAGCACTGCTTACGAGCAGTGTTTTTTCC	-14.4	12.88	ydcI+29
528773	+	483.63	AGAGCTATCGGCTGTTAACCGATCGGTCGCAGGTTCGAATCCTGCCTGTGG	-15.8	0	ydcK+192
528873	+	32979.8	GGTGTAGGTCGCGTAAGCGGCGCGAGGGTTCAAATCCCTCCTTCTCCGCCA	-19.9	16.9	ydcK+292
528975	+	1804.88	GACACCGCCCTTTCACGGCGGTAACACGGGTTCGAATCCCGTACGGGTCAT	-17.2	0	ydcK+394
529060	+	4371.38	AACGGACTTTGACTCCGTCATGCGTTGGTTCGAATCCAGCTAGCCCAGCCA	-10.8	10.63	ydcK+479
529167	+	1884.5	ACTTTTAATCAGAGGGTCGAAGGTTCGAGTCCTTCATGGCTCACCATTTGT	-11.8	0	ydcK+586
529257	+	1655.63	TTAGGATCTAGTGTCTTACGACGTGGGGGTTCGAGTCCCTTCACCCGCACT	-13.4	0	ydcK+676
529421	-	62	GAAAATAAACACAAAAAAATACCAAGGGTGTCAAAACCCTTGGTATCATTG	-18.1	0	ydcL+84
529422	+	4004.38	GGCCTAGTGGGTGAATAACCCGTGGAGGTTCAAGTCCTCTCGGCCGCATCA	-19.1	23.68	ydcK+841
529459	+	3509.88	TCTCGGCCGCATCAATGATACCAAGGGTTTTGACACCCTTGGTATTTTTTT	-17.8	92.05	ydcK+878
530891	-	21.81	AACCTCCAACATCAACAATTTGTAATTGCCCATGAATTAGGGCATTACTTT	-11.4	13.51	immA_CDS
533450	+	12.81	GAGAAACAACGTAAAGTTAGCAGGCGCAATCATCTTTGTGCCTGTTTTTTT	-18	80	ydcQ_CDS
545899	-	10.63	CTTTTACTTCTTCATAGTCTGGTGTTTTCTTTGATAACCCCAGACGATCAT	-11.8	0	yddK+267
545960	-	65.38	TGTCAATAAAACTAAAAGAGGAGTAAACACACGGTTTACTCCTCTAACTCT	-18.1	62.07	yddK+206
545999	+	74.25	GGAGAAGAGACAGAGTTAGAGGAGTAAACCGTGTGTTTACTCCTCTTTTAG	-17	69.57	yddJ+24
548620	+	90.13	GAAAAGAGGAAAAAAGCTTAATCTTTTTTCGAAGGTTAAGCTTTTTCTTTT	-20.1	61.46	phrI+63
549901	-	31.06	AAACCCTTGGTATTATTGAGATGCGGCCGAGAGGACTTGAACCTCCACGGG	-10.5	46.43	yddN+339
549931	+	1344.38	AGGGCCTAGTGGGTGAATAACCCGTGGAGGTTCAAGTCCTCTCGGCCGCAT	-19.1	74.76	yddM+280
549974	+	26.31	GGCCGCATCTCAATAATACCAAGGGTTTAACCACCTTTGGTATTATTTTTT	-18.1	82.14	yddM+323
550131	-	15.13	GAAAAGGGTGATACATATTAATCATGTATAATATGTATCACCCTTTAGTTT	-24.9	0	yddN+109
551978	-	14.31	AAAAGGCCCCAGCTTGGTAAATTCCATATCCAACCTAGGGCTTTTTTAGAG	-15.9	25	lrpB+74
552034	+	23.44	AAAAGCCCTAGGTTGGATATGGAATTTACCAAGCTGGGGCCTTTTTATACA	-19.7	51.52	lrpA+105
553262	+	32.94	ACAACTTAAAAAAGGATGTTCAGAAAAATACTTCTGGACATCCTTTATTCA	-20.9	100	yddQ+104
557494	+	69.31	AGCTAATTTTAAAATCACTTTGTCTTTATAAAGGACAAAGTGATTTTTTGT	-18.8	85.19	yddT+45
558113	+	70.94	CATAAAGTTGGGAAAGAAGGATGTTACTTATGTAGTATCCTTCTTTATTAT	-17	0	ydzN+55
559301	+	32.13	GGAGGCAACAAAAATGGAACAAGGTACAGTTAAATGGTTTAATGCAGAAAA	-3	6.59	cspC_CDS
559328	+	23.69	AGTTAAATGGTTTAATGCAGAAAAAGGTTTTGGCTTTATCGAACGCGAAAA	-3.4	17.06	cspC_CDS
559475	+	18.63	TGCTCGTGGAGCTCAAGCTGCTAACGTTCAAAAAGCTTAATCTTCAATCGT	-7.7	4.31	cspC+11
559477	+	18.69	CTCGTGGAGCTCAAGCTGCTAACGTTCAAAAAGCTTAATCTTCAATCGTTT	-7.7	3.81	cspC+13
559514	+	3542.44	ATCTTCAATCGTTTATACAAACAGGCTCTTTATATAGGGCCTGTTTTTTTA	-16.2	97.27	cspC+50
559533	-	43.94	TTCTATTACCTTGTAGCATCTCCCTACTCGAACGTTGAGTAGGGTTTTTTA	-15	15	ydeB+618
561139	-	17	GAAGTCATAACAAAAAAAAGCAAACTATTTTATATAGTTTGCTTTTCAATT	-14.2	70	ydzE+41
561178	+	13.69	AGAACAAGGTTAATTGAAAAGCAAACTATATAAAATAGTTTGCTTTTTTTT	-14.9	100	cspC+1714
566142	+	37.69	TCTTACCTAATATTGTTTGCCATACAATTATGACATTGTATGGCTTTTTTG	-13.4	45.16	ydeF+41
568995	-	10.13	AATGTTGTCCTAAGAAAAAACAAGCATCTTACTATGCTTGTTTTTCTTCTA	-14.8	0	ydeJ+295
570291	-	30.13	TGCATGAAGGTATAAAAATACCAAGGGTTGCTGGCCCTTGGTATTTTGTAT	-21.5	63.64	ydeK+80
570331	+	12	GCTCGATCGCATACAAAATACCAAGGGCCAGCAACCCTTGGTATTTTTATA	-18.6	15.79	ydeI+1393
573402	-	104.25	ACATCTTTCACCCATCTGCTTCAATCGAGCCCGCGAAAAGCGGGCTTTCTG	-15.9	95.24	ydeN+50
573431	+	13	TGTATTGATCAAACGATAACTCAGAAAGCCCGCTTTTCGCGGGCTCGATTG	-15.3	0	ydeM+32
573962	+	17.44	TTTAAAATGTCTGCTTGGACCCCATCTGCGAGCAGACGTTTTTTCAGCCAA	-18.1	30	ydeM+563
574350	+	16.56	TAGCCCTTTTCAGCTCGCCGTATCTCATCGTTTTTTCACACCCTAACTCAT	-1.3	0	ydeM+951
575665	-	36.75	CTAATAACCAGAAAAAATACCAAGGGTTTTGACGCCCTTGGTATTTCTGTG	-21.1	16.67	ydeP+47
575706	+	227.63	GGTCTGAATCACAGAAATACCAAGGGCGTCAAAACCCTTGGTATTTTTTCT	-19.4	83.05	ydeO+144
579261	+	28.88	GGAAAAAATACTTGCAATGTAAACAGGCCTCTAAAGAGACCTGTTTTTTAA	-10.9	34.88	ydzO+29
581592	+	18.5	ATGTGTTGTTCAACAGGTGTCTGCGAGCTGAGTGCAGACACCTGTTTTTGT	-22.9	21.62	ydfA+396
582533	+	22.75	TAATGAAAGAACCTTAAAAGGAGATACCAACCGATGTTGGTATCTTTTTTG	-17.6	100	ydfB+54
586588	-	193.5	CTTCAAAATAAGAAGAAGGAGTAAGATTAGAACAAATCTTACTCCTCCTAG	-19.2	92.54	ydfG+40
586630	+	45.56	CACGATATCTAGGAGGAGTAAGATTTGTTCTAATCTTACTCCTTCTTCTTA	-21.2	36.84	ydfF+82
589655	+	36.5	GCATATTTGAAAATTGCCCAAACGTACATGCCCGAATGTACGTTTTTTTCA	-12.9	23.53	ydfI+54
591893	-	39.25	CTAAATACTACCATAAGCAAAAGAGCAGATCATAAAAGATCTGCTTTTTCT	-15.6	75.68	nap+410
592203	-	78.5	TAGCCGGGCACTTCAAAAAATAGAGTCCCTCTTATGGACTCTATTTTTCTT	-16.8	25.61	nap+100
592247	+	26.56	TTGTCCAAGAAAAATAGAGTCCATAAGAGGGACTCTATTTTTTGAAGTGCC	-17.4	23.21	ydfJ+356
593023	-	16.63	ACACATGTGATTGCAAGCGGCCCAGAGGATGCCCCGCCGCTTGTATTACTC	-19.6	4.27	nap_CDS
595079	-	11.13	AATCCTTATTTCGAAGAATGAAAAGCTCCTTTTTAGAAGGAGTTTTTTCTT	-13.3	26.67	ydfM+30
598593	+	10.13	ATACGAAAGTATGTAAGAACAGTTGCTGCTTGTCAGTAACTGTTCTTTTAT	-19.8	37.5	ydfP+50
604084	+	12.75	AATAGAGCTCCATTTCTGTGTTATTCGTCCGGCATCAGCTGGGCTTTTTTT	-14.4	0	ydgD+144
604309	-	32.75	TGCGGATGTAATGGATCAGCATACAGCCAGAGCCAGCCCATTCTTTCTCCT	-9.2	29.37	vmlR+427
604465	-	39.5	TAGACGGCTGTCTCGTTGTGTGCAAATACATGTAGAGCCAGCCTTTCCGCA	-16.6	14.09	vmlR+271
604682	-	628.5	AGAAAGTTCAAGCGGCATTGAAAAGGACAACAGCTGTTGTCCTTTTTCTTT	-15.7	34.71	vmlR+54
604717	+	63.94	GAGGCTTGAACATATAAAGAAAAAGGACAACAGCTGTTGTCCTTTTCAATG	-15	17.09	ydgE+141
604906	+	10.5	TTCTTGTCTTTCTGTCTCAAGCTTTAACCGAAGCTCCTCCCGCTCATTTCT	-4.7	3.13	ydgE+330
606406	-	306.81	TCATGCACAGGCACGGCTAATCCTTCCAACACATTTGGGAGGATTTTTTTA	-15	0	ydgF+293
606428	-	282.81	TTATAAAAAATAGCTTATTTGATCATGCACAGGCACGGCTAATCCTTCCAA	-4	10.07	ydgF+271
606655	-	151.63	TCAATAAGACTCAAAACTCCTGCCTCAAAAATGAGAGCAGGAGTTTTTTTG	-21.2	78.85	ydgF+44
608214	-	16.88	AAAAACTGAAAAAGCATAAAAAAGCGGCTCCCTAAATGGAGCCGCTTTTTC	-21.6	100	dinB+32
612085	+	38.63	GAAAAGAGTAATCGAGAGAAGAGTGATGAATGGTCATCACTCTTTTTTCAT	-22.4	32.35	ydgH+40
613878	+	16.88	GCCAGCTGATTGTCGGGCCGGTCAGCGATGCGCAGGGAAGACGAAAACCGC	-14.4	19.84	ydgK_CDS
614738	+	16.25	CTTGGAATGCTTCCGCTGCTCCTCGGTTCAATCGTGTCACCGCTTGTAGGC	-10.7	0.68	ydgK_CDS
614846	-	17.94	TTGTTATTCTAAATAAAACAAAAAACCTGACGTCATGTCAGGTTTTTTTAT	-14.7	63.64	ydhB+39
614880	+	179.56	GAGTAGGGCAGAATTCATAAAAAAACCTGACATGACGTCAGGTTTTTTGTT	-16.3	74.24	ydgK+31
616593	+	114.31	TGATTTGTATGATCCGGTACCAAGGGAGAGCAGAACCCTTGGTATTTTTTT	-17.6	57.53	ydhC+48
619321	+	30.94	AAAAACAAATAAGAAAAAGAACTCCCGTACCTTGTACGGGAGTTCTTGATT	-22.9	31.11	ydhE+39
622216	-	46.31	GAAAAGGCGTAACATATTTTATACAGCTCATATGTTATGCCTTTTTCTTCA	-18.6	16.39	ydhH+77
622270	+	53.69	GAAAAAGGCATAACATATGAGCTGTATAAAATATGTTACGCCTTTTCATTT	-16.3	59.46	ydhG+52
624375	+	38.75	TGTATATAAAAATCTTAAAGCAGTAATTGCCGCCTGACAGCGGCTTTTTTT	-9.3	45	ydhJ+25
625109	-	19.81	GACCTGTTCAAACAGCAAAAAAATCCTCCTTGTAAAAGGAGGATTTTTTAT	-20.2	100	pbuE+16
625145	+	22.38	CTTTCAGCTAAATAATAAAAAATCCTCCTTTTACAAGGAGGATTTTTTTGC	-16.6	100	ydhK+36
626325	-	217.63	TCCTGATTACAAAATTTGTTTATGACATTTTTTGTAATCAGGATTTTTTTT	-21.8	62.16	ydiF+18203
635187	+	247.19	TTTGACTACGGATCAAAAGGTTAGGGGTTCGACTCCTCTCGGGCGCGCCAT	-9.9	2.43	gmuG+1325
635273	+	20100.2	CCTCAGCCTTCCAAGCTGATGTCGTGAGTTCGATTCTCATCACCCGCTCCA	-11.4	44.38	gmuG+1411
635293	+	594.38	GTCGTGAGTTCGATTCTCATCACCCGCTCCATTATTGAATGATCTTTGAAA	-5.2	11.69	gmuG+1431
635378	+	55.31	TTTTGAAAATCGCACAGCGATGTGCGTAGTCAGTCAAACTAGGGCCTGCAC	-11.6	22.87	gmuG+1516
635407	+	92.63	TCAGTCAAACTAGGGCCTGCACGATGCAGGTCACACAGGTGTCACCGCGGG	-14.1	73.5	gmuG+1545
635434	+	99.69	AGGTCACACAGGTGTCACCGCGGGATGCGGTGGACTTAACCTGTGATCCAT	-23.4	44	gmuG+1572
637053	+	60	ATATAAGACCTTGGGTCTTATAAACAGAACGTTCCCTGTCTTGTTTAGTTT	-13.6	66.67	gmuG+3191
637156	+	14.25	ATCACATTCAATTAGTAATACAAGATATCACATAGTGATTCTTTTTAACGG	-5	50	gmuG+3294
640081	+	19.06	GTGTGGCGACACATGGAGCTGACAGATACTAATCGATCGAGGACTTAACCA	-8.8	83.33	gmuG+6219
640137	-	14	TCCGTGTTCGGTATGGGAACGGGTGTGACCTCTTCGCTATCGCCACCAAAC	-11.5	100	ydiF+4391
640344	+	3712.06	GTCGGGCTCATAACCCGAAGGTCGCAGGTTCAAATCCTGCCCCCGCAACCA	-18.1	0	gmuG+6482
640482	+	5926.88	CCTGCCTGTCACGCAGGAGGTCGCGGGTTCGAGTCCCGTCCGGACCGCCAT	-20.9	33.73	gmuG+6620
640519	+	260.81	GTCCGGACCGCCATTAATGTAAACGAAACGATCATGTTTTCGTTTTTTTTG	-7.1	0	gmuG+6657
640568	+	184.94	TGTGTTTTCTTTTACTGTATCTTCTGCTTGGTGTCATAGCCAAGCTTTCTT	-11	4.14	gmuG+6706
640677	+	20	TAGGCATAAGCAGGGTTGAAAGGAGGTTTTGGTTCATGGATGAATTTGATT	-3.8	0	thiL_CDS
641124	+	10.31	AAATTGAAAAGGGACAGGCCTGTTTGCGCAGCTTGGCAAAACCGAATGATA	-9.2	0	thiL_CDS
641539	+	102.81	GTGGGAAGTGTTGAAGCAGGAGTGCGCAGCGCTTCATCTTCCCATTACAAA	-17.7	0	thiL_CDS
641847	+	11.25	TGCAGAAGGGCTGGGAATTACACGTATTGTAAACAGTCCGACTTTTACAAT	-10.4	0	ydiB_CDS
642141	+	10.88	TTGTGAGGAGTTAAGTAGACATGACAATATTAGCAATTGATACATCAAATT	-2.7	0	ydiC_CDS
642192	+	21.75	ATACATTGGGCATTGCGCTGCTTCGAGAAGACACTGTTATAGCAGAATACA	-6	0	ydiC_CDS
642620	+	32.81	AAGGACCGCCCTGTTTTGTTTTTAGGCCATGATACTTCTCTTCACAAGCAG	-5.4	0.84	ydiC_CDS
642920	+	15.19	ATCGAAGCATCCTCCTTTACGTCTCCTTGGACGAAGGATTCGTTTTATCAT	-11.1	0	rimI_CDS
643199	+	22.31	CATCCTGCTCAAGGCTTATATAAGAAATTCGGGATGCAGCCCGGCGGAATA	-10.8	0	rimI_CDS
643426	+	12	AAAGCCATAAGCGCTTCGGAGGCGTTGTTCCGGAAATTGCTTCAAGACATC	-11.3	10.49	gcp_CDS
643445	+	13.19	AGGCGTTGTTCCGGAAATTGCTTCAAGACATCATGTTGAACAAATCACTTT	-3.7	0	gcp_CDS
643482	+	16.5	GAACAAATCACTTTGGTTATAGAAGAGGCGTTTCGCAAAGCTGGCATGACG	-6	5.87	gcp_CDS
644049	+	11.31	AGTGTGATCGATGTCTTGGTAACCAAAACGGCGCGCGCGGCAAAGGAATAT	-10.2	0	gcp_CDS
644278	+	21.44	TTCGCGGTGCATATGATATGAATGGCCAGCCCGGCCTTGAATTGACTTCTT	-7.7	10.87	gcp_CDS
644317	+	1005.31	AATTGACTTCTTATCAAAGTCTCACGAGATAATAGCGTGAGACTTTTTATC	-14.7	59.52	gcp+19
644492	-	47.88	ACAGAAGAAGATTAAAAAAGTCAAGCACCTCTTTTTAGAGGTGCTTTTTAT	-17.4	76.92	ydiF+36
644527	+	183.94	GGGGATGTTCTGTGGATAAAAAGCACCTCTAAAAAGAGGTGCTTGACTTTT	-17.1	23.18	gcp+229
648703	-	142.25	AACCAAAAATAAAGAAAATCCATTTCTCGCATGAGAAATGGATTTTTTATT	-19.7	77.27	ydiK+39
648743	+	604.75	TCTGGGCAATAATAAAAAATCCATTTCTCATGCGAGAAATGGATTTTCTTT	-17.5	93.55	tatCY+39
649995	+	13.13	GAATCTGAAGAAAAAACTGCCAGCGGAATTGTGTTGCCGGATTCTGCAAAA	-9.7	0	groES_CDS
650073	+	16.69	GCAGCTGGTTCAGGTCGCGTGTTAGAAAGCGGAGAGCGCGTTGCTTTAGAA	-15.6	0	groES_CDS
651692	+	15.56	AAATCGGCGTAGGCTTCAACGCTGCAACTGGCGAATGGGTAAACATGATCG	-8.5	0	groEL_CDS
651936	-	43.25	GAAAAGGTCTCCCAACAGTTTAGTAAACTGATGAAAGACCTTCTCTTTTTT	-16.5	48.89	gutR+12839
651990	+	1236.38	AAGAGAAGGTCTTTCATCAGTTTACTAAACTGTTGGGAGACCTTTTCTCCA	-26.5	47.45	groEL+122
652089	-	15.5	TAAAAAGAATGTCACCCCCCACTCTTTTAGGCATACCCATACCTCCTTACT	-4.4	1.54	gutR+12686
652221	+	54.56	AGTCTCAATAACCTTTCTTAATTGCGGATGACCATCCTCCCGCTCAAAAAT	-5.7	25.35	groEL+353
657725	-	87.56	AAAAAATTAAAGATAAAAAACGGAGCTGGTTTTATCCAGCTCCGATACTTT	-18.4	76.62	gutR+7050
657761	+	278.88	AGAGAGCATACTAAAAAGTATCGGAGCTGGATAAAACCAGCTCCGTTTTTT	-20.3	37.09	ydiP+64
657949	-	32.38	GAGAGACTGTGGAAGGCCCTGAGGAACTCATGGGCCTTCCACAGTCAAATG	-36.3	0	gutR+6826
658001	+	20.69	TTTGACTGTGGAAGGCCCATGAGTTCCTCAGGGCCTTCCACAGTCTCTCGA	-35.8	5.56	ydiP+304
658762	+	49.25	TCTTTTCCCACCGCTACATGCTTGTAGTTCATTGCCGCCAAGGCCATTGCA	-11.9	12.09	ydiP+1065
658876	+	14.56	TTGAGTTTTCTGAAATAGTTCAAGGTATGCCTTGTCCACCTCTGCGCTATA	-8.2	0	ydiP+1179
659104	+	10.69	TGGATGCCAGTGTCCTGGCGGCTTCCATTATAAAAGCCGCCAACCCAGCAG	-18.6	13.16	ydiP+1407
663329	+	224.63	AAATTTTCAAGGCTTCTCATGAGTTCACCGAACTTGTGAGAAGCTTCTTTT	-22.9	52.97	ydjA+302
663606	+	36.56	TAGCTAAAAGACGATGTTTTCCTTGCAATAAGGAACTCGTCTTTTATGTTA	-18.2	7.35	ydjB_CDS
664691	-	14.63	TTTATTATAAATAGGAAAGGCCAACTGAAGTCGCAGTTGGCCTTTCGTTTC	-23.3	17.86	gutR+84
664732	+	31.44	CTTTAATAAGAAACGAAAGGCCAACTGCGACTTCAGTTGGCCTTTCCTATT	-21.9	66.67	ydjC+63
670796	+	12.19	CGGAGCCAACATTGTCGCTGTGACACTTGGGAAAAGCGGAACGCTTCTTTC	-11.3	0	ydjE_CDS
671102	+	129.69	CATTGAAGATGTTTCTTGAAAGTCTTTGGACTTTTGGGGGCATCTTTTTTT	-19.6	95.16	ydjE+53
671967	+	30.06	CTCGATAAGTAATACATAGGAGGCCGCAGCTTTCGGCTGCGGCGTCATTTT	-21.8	0	pspA+39
674835	+	173.69	AGAATCATACAGTGAAAAGTCCGGAGTGATCAGCACTCGGGACTTTTTTAT	-19.8	47.69	ydjI+50
677866	-	590.88	AACTAATTTGAAACCAAAAAGAATCCGCACTCGGGTGCGGATTCTTTTTTA	-21.4	99.17	bdhA+45
677909	-	15.94	TCTTATTAAAGAGAAAAGCCAAGTCAAAATCCTTGTTAGACCTAACTAATT	-3.9	37.16	bdhA+2
679811	+	182	ATGTACATATATAATCTGGAAAGCAAGAAGTCACATTCTTGCTTTTTCTAT	-13.3	27.28	ydjM+50
680110	+	14.81	CTTGGATCAAAAACAGCAGGTGCTCTATTATACGGGCAATAATGAACAGAA	-7.2	8.66	ydjN_CDS
680347	+	37.38	TCTTTATCCTGCCGCTAATGATCAGGATGACACCGTCAGCAGCTTCTTTTA	-7.4	2.28	ydjN_CDS
680603	+	15.25	TTATTCACATCATATACGCAAAAAGGAACGGAGCAAACCGCTTCTATTCAA	-6.5	0	ydjN_CDS
680867	+	16.31	AAAAAAGTATGGGAAAATCCGAACGGCATCATCAACAGCTTTTTTGTGATT	-6.4	2.63	ydjN_CDS
680877	-	43.38	GCCCTGCACCTCATCCATTAAAAAAGCCACTCAGCTCATGCCGAGTGGTTT	-15.3	54.17	ydzJ+30
680909	+	730.31	TTTGTGATTAACTAATAAAAACCACTCGGCATGAGCTGAGTGGCTTTTTTA	-16.9	66.77	ydjN+36
681107	-	357	CCAAATACGAAGAAAGAAGCCCAAAACTGTAAACGTTTAGGGCTTTTTTGT	-15.6	73.71	ydjO+148
681148	+	37.63	TTAAAACAGACAAAAAAGCCCTAAACGTTTACAGTTTTGGGCTTCTTTCTT	-12.3	34.55	ydjN+275
681181	+	12.19	GTTTTGGGCTTCTTTCTTCGTATTTGGCCTCTTGCAATGAGAGGCTTTTAT	-11.9	0	ydjN+308
681317	-	11.56	AAAACTTCGCCAGCAGTGATACGCCATTGTGCCCTTTGTGCGGAAGTAAAA	-11.5	0	ydjO_CDS
685112	-	128.56	TGCCTTAATGCTGATCAAATCCTAAACGGCCTGCCGTTTAGGATTTTGTTA	-19.7	85.25	gabP+43
688063	+	37.5	TTTAGGATTTTGTCAACAATCTGGAGCTTCCTGCCACAGGAAGCTTTTTTG	-17.4	50	yeaB+229
692701	+	723.81	ACGGCCTTGCCAAAGAGGGCGGAGCGAGCTTCATATCTGTCCTCGTTTTTT	-16.9	0	yebA+124
692881	+	25.06	TTTACAGCGAGCTGCATCCACATACATTGACGGCTGAAGAAATTAAAAAAA	-6	0	guaA_CDS
693964	+	14.44	CAGGACCGGGACTCGGAATCCGCGTTCTTGGCGAAGTAACAGAAGAAAAAC	-10.5	2.14	guaA_CDS
694293	+	10.13	ATTACAAGTAAGCCGCCTGCGACGATTGAGTGGGAATAAGAATCAATTAAT	-4.8	57.82	guaA+12
694314	+	11.25	ACGATTGAGTGGGAATAAGAATCAATTAATGGAAACCATCTTTTTGGCAAT	-5.3	11.53	guaA+33
694338	+	1430.81	ATTAATGGAAACCATCTTTTTGGCAATTTTGCCGGGAAGATGGTTTTATTT	-25.2	93.76	guaA+57
694516	+	214.56	GCTCGCAAGTCTCTACCAAGCTACCGTAAATGGCTTGACTACGTAAACATT	-7.2	1.09	guaA+235
694569	+	15.69	TTTCGTTTGATATAAATAAAACACGGTTATTTATTCAAACTGAAATCCGTC	-10.3	40.4	guaA+288
694589	+	102.94	ACACGGTTATTTATTCAAACTGAAATCCGTCTGTAGTCAAGCGTCCCAAAA	-3.9	3.38	guaA+308
694608	+	1195.44	CTGAAATCCGTCTGTAGTCAAGCGTCCCAAAATGTATTGGGACGTTTTTTA	-15.6	45.99	guaA+327
696024	+	193.31	TCTTAAAATAAGGAATGAAAAACCAGCTGCACTGGCAGCTGGTTTTTTTGT	-21.9	85.11	pbuG+40
697369	+	17.75	ATCTGACAATAGATATAAAGAGGTGAGTCTGCTGAAAAGCGGGCTTTTTTG	-13.5	27.27	yebD+45
698462	+	111.38	CCATAAGTTTCTACCCGGCAACCGTAAATTGCCGGACTATGCAGGAAAGTG	-11.2	0	yebG+173
698572	+	183.69	GCCCGGTTTGTATTGCTTCCTCATAAGTGCAATGCAGAGCGGGTATTTTTT	-23.5	52.71	yebG+283
706919	+	27.13	TAAAACTTGAAAAATGACATAAAGGCAGCGCAGTTCGGCTGCCTTTCTCTT	-15.1	0.47	purF+48
711418	-	49.56	TCCCGCTTTTTGATAACAAAAAACCCGCAGCTATTCTGCGGGTTTTCCTCA	-16.5	60.53	yezC+38
711454	+	87.5	TGCCCAAAAATAAGTGAGGAAAACCCGCAGAATAGCTGCGGGTTTTTTGTT	-19.1	47.95	purD+38
714027	+	66.13	AATACGGAACAACGACATTCGTGAATGATAACTTATTTTTGCTTTTGCAAA	-6.5	0	yerA_CDS
715511	+	33.13	TGTGTTTCGTGTTTTTTCTGCTGGTATCCTGCCAGCAGAAGGATGCTGTCC	-20.7	0	yerB_CDS
715929	+	11.63	ATTTTGGAGAGCTGATTTCAGCAAACCGCCCCACAATTCCTATACGTCTTA	-6.5	0	yerB_CDS
716782	+	670.25	CTTCTTCCAAATAAAAAACCGCCCTGCCGTCTGGCAAGGGCGGTTTCTTTA	-23.3	74.34	yerC+37
724865	+	195.81	TTTATGACTGATAGAAAACCCTTGTGCCATATTGGCACAAGGGTTTTTATG	-25.6	63.77	yerH+40
725052	+	19	AAAGATATCAAAAAAATATTTCATGAAGAGCAGGTTTTGGCAGAAGCTGCA	-7.6	8.67	yerI_CDS
725999	-	56.69	TGTGATACATTATAAAAGCCAATGGGACTGGAATCCCATTGGCTTTTTCTA	-21.4	45.45	sapB+36
726039	+	115.31	CTGGTGTAGATAGAAAAAGCCAATGGGATTCCAGTCCCATTGGCTTTTATA	-23.5	53.19	yerI+42
726801	-	78.06	CGCAAAAAGTAAGCAATAAGCCATCAAGCGCAGCTTGGTGGCTTTTGTGCT	-22	56.45	opuE+39
727720	-	22.13	GACTGACTTCGTGCAGGGTGCGATCATGTTTGCAGCACTAGTGCTTGTGCC	-12	30	opuE_CDS
729000	+	13.75	GGTTGAGGATGTCATGAAAAATGCGCCTGACCATAAAGACGGCTATATTCG	-9.8	0	gatC_CDS
729041	+	14.31	GCTATATTCGTGTGCCATCAATTCTGGACTAAAGGAGGGACACAAGAATGT	-11	0	gatA_CDS
729069	+	25.88	CTAAAGGAGGGACACAAGAATGTCATTATTTGATCATAAAATCACAGAATT	-3.7	1.22	gatA_CDS
729926	+	17.81	TCTTGGCAGCGCTGAAAGTCCTTGAAGGTCTCGGCGCTACATGGGAAGAAG	-16.1	0	gatA_CDS
730356	+	15.63	AAACGATATCTTAACGATTCCGGTCAACCTTGCCGGCGTACCGGGAATCAG	-12.8	0	gatA_CDS
731634	+	10.31	AGCTTGCCGATGTTGCCCTGACACCTGAAGGCCTTGCCGGCATGATCAAAT	-10.6	0	gatB_CDS
731919	+	72.5	AAGCGTCCAAAGGACAAGCCAACCCGCCGATGGTCAACAAAATTCTGCTTG	-6.2	13.16	gatB_CDS
731973	+	485.69	AAATTAAAAAACGCTAATAAAAAAGCAGCCCTTAGAGGCTGCTTTTTTTAT	-16.5	99.4	gatB+34
733051	+	16.63	GGCTGATGACGATTATTGTAACGGCAGCCGGCTTGTATGCGGGTATGAATA	-13.5	3.11	swrC_CDS
736150	+	267.75	CGGAAGAAGAGTAAAAAACAAAAAGCCTCAGCTCTGCTGAGGCTTTCAGCT	-17.5	12.68	swrC+37
736324	+	81.69	TTAAGGATGACAAAAGCTCAAAACAAGAATCAGTTTTGAGCTTTTGTGCGT	-21.3	8.54	swrC+211
737384	+	42	AGTTGGATGACTAAAACTTGGCTTGGTAAGCCAAGCTCAGAATGTTGACAA	-12	22.73	yerQ+37
737421	+	85.63	CAGAATGTTGACAAAATCCTAAAACAGTTTTCGTTTTAGGATTTTGTCATC	-22.4	2.56	yerQ+74
737536	+	24.94	GAATTCGTGAGCACCGAAGCACAGGCCTGACAACGAATGCGAAGGTTTGCC	-9.6	0	yerQ+189
737558	+	25.06	AGGCCTGACAACGAATGCGAAGGTTTGCCTACACGCTGAAACTTGGCTTGA	-10.4	0	yerQ+211
737577	+	48.19	AAGGTTTGCCTACACGCTGAAACTTGGCTTGAATAGGCCAAGTTTTTCTTT	-16.5	0	yerQ+230
738378	+	13.63	CGTCAAATCCATCGTGCAAAACATCAACCCAAACAAAACAAACGTCATTTT	0	0	yefA_CDS
739062	+	47.69	TTGGTTCTCTAAAACGATAATTGATTTCAATGGTTCCATTTGCATGTACTT	-2.3	3.93	yefA+80
739318	+	27.81	AACACCATTAGCAAGAGAGATAACTAAATTGGATTTATCTCTCTTTTTATC	-11.9	22.45	yefA+336
739628	+	43.63	CAAACCGCAGTATTTGTAAAGAGATGTACTTCAGCTTGAGGTCTCCTTCTT	-7.2	5.65	yefA+646
747036	-	30	GTCTATAATTAAAAAATGGCTCAGCCCTACTCTGCTGAGCTATTTTTTATA	-21.1	36.36	yezG+43
747078	+	25.38	GATTGGTTTATAAAAAATAGCTCAGCAGAGTAGGGCTGAGCCATTTTTTAA	-17.4	0	yeeC+1079
752264	+	29	CCTTACAAACTTAGTGATCAGAAGAAAGCCCTTAGCTAGGGCTTTTTCTTG	-16.4	0	phrH+12
753164	+	235.06	GTTGATTTAGGTGAGTAAGGAGTGAGCAGGCTGTTATGGCCTGCTTTTTTT	-15	60	yeeI+33
753753	+	36	AGAAGATGATGATAAAAAGAGGACACTCTTGCAGATCAAGAGTGTTTTTTT	-15.9	87.5	yeeK+51
754431	+	42.06	AGTTTATCAGTGCTTGATTAACATGTGGTAAAGGATTCTTTGCCCATGTAT	-14.5	17.65	yezE+30
757681	+	56.44	AGAAAGAGATTACGGCAGAATAAGCGTCCTTTGCAGGGGGCTTTTTTGTCT	-16.6	30.48	yesK_CDS
785083	-	169.38	CAAGGGACATACAATCAATAAAAAGCTTGCGCCTTGCTGCAAGCTTTTTTC	-14.2	67.39	yetG+30
785504	-	166.88	TTAAAAGAATAAACTGTTGCGCACGGCGGTTCGATTCCGCCCTGCGCTTTC	-19.3	43.24	yetH+39
787613	+	245.19	AGTTTCCAGGCATATGATTGTCCGTCACCGGGTGATCATATGCCTTTTTGA	-22.4	94.05	yetF+2537
788098	+	51.19	CTTTGTCTTCACATTGCTGATCGCGACTGTCGGCCTTTTTATCGGCCAATT	-12.5	0	yetJ_CDS
788138	+	15.75	ATCGGCCAATTTGTTCCTGTCGCTTTGATGCTGCCGCTTTCTATTCTTGAA	-3.8	0	yetJ_CDS
788306	+	25.06	GCTTCCATCGCCGGCGCCTATGTCGTGCTCGAAGCCTTTGGCTCTACATTT	-11.8	0	yetJ_CDS
788344	+	13.38	TGGCTCTACATTTGTCATTTTTGCCGTCTTGGGCACAATCGGCGCAAAAAT	-13	0.2	yetJ_CDS
788422	+	12.5	GTTTCTGCTGGTTGCGGTGCTCGCACTCGCAGTGGTAGGGATTTTCAACAT	-16.3	0	yetJ_CDS
788497	+	19.31	GATGATGGCGTATTCCGTGATCGGAACCATCGTCTTTTCCCTTTACATTTT	-16.2	0	yetJ_CDS
788674	+	624.56	CAGTGATGATTAATGAAAAAGCGTCTGTCATTGGATAGGCGCTTTTTGCCA	-18.9	10.24	yetK_CDS
789291	+	14	TATTTCGGCACTGGCGATTTCGACCTTCGTATCGCTCTTCGGCTTCCTGTT	-10.3	0	yetK_CDS
789580	-	40.5	GGCTATAGCGTCTTTTCTTCTGCAGCCGGATACGCATCCGGCTGTTTTTTC	-18.5	16.25	yetL+72
789614	+	58.06	TTGTTACGGTCATAAAGAAAAAACAGCCGGATGCGTATCCGGCTGCAGAAG	-15.9	10.4	yetK_CDS
789653	+	315.81	CGGCTGCAGAAGAAAAGACGCTATAGCCTGTCCGGATCGGACGGGTTTTTT	-15.1	55.21	yetK+25
791429	-	24.56	AAAACAGAGCAAGACTAAAAAGTCCAGAAATCACTTTCTGGACTTTTCCTA	-16	17.65	yetN+33
796225	+	106.13	ATATTCCGGCTTGCCGCGGTGTATTTATTGTTGTGTGATGCCTTGATTTTG	-9.6	0	yetO+358
796687	+	10.63	AAACATGGGAGACGGGATTTTCAGTATCATGGCCGGTCATGATATTTTCTA	-9.8	0	ltaSA_CDS
796873	+	13.25	GGAAAAAGACCGTCCGCAACTGCTGACAAGAACGTTTGACCGCAATTATAT	-5.1	0	ltaSA_CDS
797430	+	12.31	TTTACAAACATATCGGATATGACAAGTTCTTCGACGCAAGCACGTATGATA	-3.4	0.18	ltaSA_CDS
798232	+	17.13	AGCCGTTGATCCGTCAGACTATCATTACGGCAAGGAGAAAGAAATCAAATA	-8.3	29.87	ltaSA_CDS
798251	+	26.31	TATCATTACGGCAAGGAGAAAGAAATCAAATAAGATGAAAAAGAGCCTTGA	-6.7	77.38	ltaSA+18
798286	+	49.5	TGAAAAAGAGCCTTGAGCGGGCGCATTGCCTTCGCTCAAGGCTCTTTTTTT	-33.3	90.48	ltaSA+53
803284	-	553.94	AGAGAATGGCATAGCTGAAAAAACCCCTGCCAGGCGGCAGGGGGTTTTTTA	-22.9	85.34	yfnC+33
803319	+	23.06	TTTATCCAGCTGGATTAAAAAACCCCCTGCCGCCTGGCAGGGGTTTTTTCA	-25.8	47.83	yfnD+33
806003	-	17.5	TACGGTTCTGTACATCGCGGTATCGCTTGTGCTGACAGGCATGATGCCTTA	-16.8	6.82	yfnA_CDS
808148	+	16.06	CGGGCTGATGAAGACTGTAGAGCAAGCAATTGAAGAAGGCGCTGTACCAGT	-9	0	yfmT_CDS
808328	+	12	CGAAGCGGTGGATATCGCAAACGAAACCCCGTTTGGCTTGAGCGGTGCCGT	-14.3	4.68	yfmT_CDS
809455	+	1333.88	GCGCTTGAGGAAGAGTAAGAGACCGGGGACAAACATCCCCGGTCTTTTTCT	-25	71.47	yfmS+33
811480	+	175.13	AAGAACTGGAAAGCTAAAAAGCGTGGCCGCAGCAGGCCGCGCTTTTTTTCA	-22.7	47.06	yfmR+34
812061	+	188.38	CTTAAACAGGAAAGTGAAAGACGGGTGCTGTATGCTGCTCGTCTTTTTTAT	-15.9	93.46	yfmQ+46
813856	+	38.56	GGCGGGGCATTAATAACGAAAGACACTGCGCATATGCAGTGTCTTTTTATT	-17.9	66.67	yfmO+38
814343	-	47.31	AGTGCTTTAATTTATAAAAAAACCCGCCTGCTAAAGGGCGGGTTTTTTACT	-20.5	96.3	yfmM+41
814907	-	15.5	GAAGGATCTCGTGATCGGTTACGATTCCCCGCTGTCCCGTCCGCTCAACCT	-9.7	0	yfmM_CDS
817270	+	130.38	GGCGGAAAACTGAAGACGAAATAAAAAGAAGGGCGAAGAGCCCTTTTTTTG	-15.1	62.37	yfmL+27
817770	-	271.63	ATCCGAGCTGAATGAAGATGAAAACGGGAGGGCTTTTTGCCCTCCTTTTGT	-16.4	90.78	yfmJ+40
817802	+	26.44	AACTGATCTCATCGAAACACAAAAGGAGGGCAAAAAGCCCTCCCGTTTTCA	-15	0	yfmK+45
820837	+	219.31	ATGAAAAATGGTAAACACTTAGGGAATAGCATTTAATGCTATTCCTTATTT	-16.1	84.76	yfmK+3080
822381	-	29.56	ATTTAAAATAAAATCTTGTAGAAAAAACATTGTTTTTTCTACAAGCTGAAC	-14.9	26.92	yfmF+522
822852	-	392.13	AAAGGAGAGGAATTCCCTAGGGCTGTCGAGAAACGTGACAGCCTTCATTTT	-17.6	37.66	yfmF+51
823750	-	21.69	TGAAATACCTGCCGGAATACTGACAGCCGTGATCGGCGCGCCTTATTTCTT	-10.2	0	yfmE_CDS
824325	-	36.06	GAGTCGCCGGTATACGTGCTTCCGTTCTCCGCATTTGCCGGAGCCGCCATT	-13.1	7.05	yfmE_CDS
824717	-	10.19	ATCGGAACGCCGTTTTTCTTATATTTGGCAAGGAAAGGGCGAAACCTGAAA	-12.5	0	yfmD_CDS
824888	-	18.56	TTTGTCGGGCTGCTCGTCCCGCATATTGTCCGCAAGCTGATCGGAGAACAT	-10.7	1.95	yfmD_CDS
825748	-	363.94	TATAATAAATAGGACAAATGAGAAGCGAGGGGAATCCTTGCTTCTTCGTTT	-20.2	2.06	yfmC+39
826276	-	14.81	CTGAAAAAAATCGCCCCGACGATTGAATTAAAAAGCCGTGAAGCGACATAT	-5.5	10.08	yfmC_CDS
826467	-	31.31	ACAATCTCGGCATTACGCCGGTGGGCATCGCAGATGACAACAAAAAAGATA	-9.7	0	yfmC_CDS
829298	+	14.44	TAAATTAAGAAAGTGAAAAACACAAAGGGTGCTAACCTTTGTGTTTTTTAA	-18.5	17.86	pel+43
830853	+	23.63	ACTAGGAATATGGTAGAAAGAAAAAGGCAGACGCGGTCTGCCTTTTTTTAT	-19.5	100	yflS+35
831095	+	18.5	CCGTTCAGCATACACAGGGAGAACGGAGACAGGCAGAGCAGCTGGCGGTTC	-11.3	7.26	citS_CDS
834214	+	37.75	CAAAGCATCATGACAGGAAATTAAAATCCCGACATCCCGGGATTTTTTTCA	-13.4	77.42	yflP+27
836559	+	22.31	TGGCAAATCGGTTATCGTCTATTTGACACCCGCACCACGCGGGTGTTTTTT	-16.6	70	yflN+25
837440	-	10.44	CTTGATCCTTCCATAAATCCGTATTGTAATCAGCGGCGATGCCGATCACGG	-8.1	28.57	yflL+295
837589	-	33.06	CCACGTCCAGTCCCCCGTCAGCTTTCTGCCCGCTTCTTCCTCCTGTTCTTC	-1.8	12.96	yflL+146
838741	-	117.81	CAATCTTAAATATGGCAAAGCCGCGCACGTTGATATGCGCGGCTTTTTTCT	-19	91.18	yflJ+42
838780	+	35.75	GCCGGTTGAATAGAAAAAAGCCGCGCATATCAACGTGCGCGGCTTTGCCAT	-22.2	7.14	yflK+38
839304	-	174.81	GGTTGATAAACAATAAAACATGAGCCGGGCGATATGCGCCCGGCTTTCTTG	-21.2	14.7	yflH+35
839338	+	88.81	CGGGCTGTGACAATATCAAGAAAGCCGGGCGCATATCGCCCGGCTCATGTT	-18.6	50.49	yflK+596
839652	-	20.06	CCTCCAATTGCAGGTAAAGCATCATTATTCTGTACGAGGAGGTCTTGCAAT	-12.7	0	yflH_CDS
842010	-	860.81	ACGAAGATAAATAAGAAAAAGCGGAGAGGTTGCCCTCTCCGCTTTTTTATT	-24.3	98.61	yflE+37
842048	+	288.5	GGGCTGCTGTCAAATAAAAAAGCGGAGAGGGCAACCTCTCCGCTTTTTCTT	-26.4	82.61	nagP+34
842050	-	48.94	ACAAAACATGACGAAGATTCTTCCGAAACGTCAAAGGATAACGAAGATAAA	-4	65.93	yflE_CDS
842443	-	18.38	CGGGTGCCGCTCTTTATCCACGCTGCCGGCGTGAAGGGCGAGAAAGTTCAT	-16.1	0	yflE_CDS
842648	-	10.44	CGTCGATAACTATTTCCAGTCAGCCCATTACCTTGATCAGTCCATTGAACA	-1.2	0	yflE_CDS
842888	-	72.88	CGAAATGTACAAGGCGGAAGGCATTGATAAATTCTTTGATTCTGCTTACTA	-11.4	0	yflE_CDS
843100	-	33.38	TTCTACTTTGATAACTTTTTCCACCAAACGGGACAAGGTAAAACATCTGAT	-6.1	2.59	yflE_CDS
843152	-	11.88	CGGCAAAGAAGTGACACCATTCTTAAATAAACTGGCACATGATAACGAAAC	-2.5	0	yflE_CDS
843175	-	10.06	TTTATCATCGACTATAAAATTGACGGCAAAGAAGTGACACCATTCTTAAAT	-2.6	0	yflE_CDS
843221	-	10.81	GGAAGGAAAAAACGTCATTTACGTTTCACTTGAATCTTTGCAGTCATTTAT	-3.7	0	yflE_CDS
843432	-	14.69	AATCAGACCGTCCTGAATTGCTGACAAGATCATTCGACCGGAACTATCTTG	-9.9	0	yflE_CDS
843530	-	41.75	CAAAGTAAACAAGCCTGCCGAAACGTCAAGCAAAAAATCGTTCCGAATTAT	-3.3	0	yflE_CDS
843764	-	22.88	CTTGTTCAAGAAAAAATTACAGCAGACAGCCATTATAGTGATTCATTTTTT	-2.4	0	yflE_CDS
843871	-	11.19	GTCGGTTATGTCCTGAATTTCAACTTAGGAATAGACAACACGATACAAAAA	-9.4	13.55	yflE_CDS
850513	+	12.56	TTTGCTTTAATAGATGAAAGCAAGGTTGACCAAGAGATGCTTGATCAAATT	-12.8	5.91	treP_CDS
850516	+	12.5	GCTTTAATAGATGAAAGCAAGGTTGACCAAGAGATGCTTGATCAAATTGAT	-9.2	10.14	treP_CDS
850579	+	98.63	TCATTCTCGACAAACGGACAGTTTCAGGTCGTAATCGGCCAGGGAACTGTC	-20.4	0	treP_CDS
850669	+	22.63	GGCGAGTCAACAAAGGATGAAGTGAAGAAGGCCTCAGAAAAAAATATGAAT	-3.8	1.45	treP_CDS
850842	+	23.94	CACAAAATCGATTGTGCAGGTTTATCCGCAGTGGGCGGATCTTGCTAATAT	-15	0	treP_CDS
850977	+	10.44	GCTTCTCGGCATTGTGCTCGGGGTTATGCTCGTGCATCCTGATTTGCTGAA	-15.5	3.82	treP_CDS
851337	+	12.81	GGGCGGTCTGTTATATGGCGGTTTCTACTCAGCGCTCGTGATTACCGGTAT	-11.1	8.73	treP_CDS
851548	+	71.31	ACATCAGGGATTTCTGCTTATCTTGGCATTACAGAGCCTGCCATCTTTGGG	-11.2	0.34	treP_CDS
851611	+	33.63	TACAGATTCCCGTTTATCATTGCAATGGTCAGCTCTGGCCTGGCCGGAATG	-11	0	treP_CDS
851821	+	581.94	CATAAATAACAAGTGGGGAGCGGGACGTGTTGAACGTTCCCTTTTCCCGTT	-18.9	0	treP+42
852038	+	10.25	CAGGTGGATGTGCTTTGGCTGACGCCGATTTATGATTCTCCCCAGCATGAT	-11.1	10.54	treA_CDS
852234	+	18.69	AATGGTTTCGCGAGGCGATCTCTTCAATAGACAGCCCGTACCGTGATTTTT	-13.5	0	treA_CDS
852423	+	11.63	ATTGGGAAAATGAAGAGGTCAGAAAGCATGTCTATGACATGATGCATTTTT	-7.1	0	treA_CDS
853214	+	15.75	CCGGTTGCAGGAAATTACCGGGAAATCAATGCTGAAGCGGCGCTGAGGGAT	-12.6	20.1	treA_CDS
853634	+	10.88	ATAAAGACATCGCACAGCAAATTGAAGGCGGCCGATGGAAAGCGGAGGAGA	-6.6	0.7	treR_CDS
854017	+	41	ATTTTGGACAAGGATTACTTTTTCAGAAAGCATGTCCCTCACCTGACGAAA	-7.5	8.21	treR_CDS
854270	+	18.94	GACACCGTCTCGACAAATTCCGATTTGTTGATTTTGCGCGGCGGGGGAAAT	-13.1	38.59	treR_CDS
854306	+	2198.69	CGCGGCGGGGGAAATGAGAGAGGCGCCTGCCTGCGGCAGCGCGCTTTTTTG	-21.4	62.75	treR+34
855080	-	44.31	GAGCGAATCAGGCATAAAAAAGAGCTGCTCGCTATGCGAGCAGCTTTCTTC	-21.6	56.52	yfkN+34
855115	+	467.19	GAAGTGGGTTTAAAAGAAGAAAGCTGCTCGCATAGCGAGCAGCTCTTTTTT	-21.5	97.37	yfkO+38
860137	-	20.5	TCCTGGCAAACAACCACTTCCTTGTCCACAACGTCGGCACCGGCGTTTTCC	-11.5	12	yfkL+166
860262	-	307.25	TCAAGCCTAAGCAACAAAAAAACGGACGCCCAAGAGCGTCCGTTTTTTCTT	-19.1	55.65	yfkL+41
860971	-	15.13	TGTTTTACGGATTTGCTTTTTATCTGCCGGCAGCGGTCTATCTCCTGAATA	-7.2	0	yfkL_CDS
861459	-	11.06	TTGAAGGAGTACAAGCATGCAAACGACATCTATCAAAACAGCATCCGGAAT	-2.4	3.08	yfkL_CDS
861552	-	294.13	CCTCGCTTCGTAAATAATGGAGACTGGCCGGAAACTCGGCGAGTCTTTTTT	-17.5	8.97	yfkK+34
863822	-	24.13	CATCTTCTTAATCAAAAAGCCTCCCGACATCATGTCAGGAGGCTTTTATGC	-20.1	65	yfkF+40
863862	+	53.13	GCTACCATTAGCATAAAAGCCTCCTGACATGATGTCGGGAGGCTTTTTGAT	-26.7	78.95	yfkH+199
867125	-	170.25	AGAACCCAATAAACAAAAAAACTGATTCCGAGTTGGAATCAGTTTTTTATT	-17.3	84.95	yfkC+39
867163	+	11.5	ACTGCCAAGATAAATAAAAAACTGATTCCAACTCGGAATCAGTTTTTTTGT	-16.8	16.67	yfkD+38
869485	+	176.69	CGTTTTAAAAAAGATTGGGAATAAAACCGCGTGCCCGCCGCGGTTTTTTTA	-11.4	43.88	yfjT+27
870352	-	68.69	AAATGTATAAAATAAAGAAAAGCCTCTCCGTTTAAGGAGAGGTCTTTCTCT	-19.6	39.76	yfjR+36
870390	+	17.5	CGTCTTTGTAAAAGAGAAAGACCTCTCCTTAAACGGAGAGGCTTTTCTTTA	-19.7	0	pdaA+40
871321	-	26.56	AGGATGGTTCAATATTTTTAAATGAGGACAGCGAGCAGCTGTTCTTTTTTG	-15.3	43.33	yfjQ+26
874624	+	27.88	CATTGTAGACCCGCCAAGAACGGGCTGTGACAGCACGTTCTTGGACACGAT	-19.3	3.55	yfjO_CDS
874891	+	134.88	AGACCTGGATTTCGGTAAAATAAACAATTCCGATTTCCGGGTCTTTTTCGT	-21	93.33	yfjO+89
877503	+	55.63	CAATTCTTGACTAAAATAAACCTGGATTTTCGGTAAATCCGGGTCTTTTTT	-13	13	dusC+100
878837	+	30.06	ATAAATACGTCGATCATTGTCAAAGGCCGGGTGATATCCGGTCTTTTTTTT	-15.9	25	yfjL+67
883682	+	19.38	TACATGCATAATAAAGGAAAAAGCAGGCGCATGGATATAAGGCGCCTGCTT	-17.7	100	acoL+40
885808	-	14.94	GCGCCGCGCGGATAACAAAATGGCCTGCTTATGAAGCGGGCCATTTTTGTT	-24	62.5	yfjF+36
891434	+	26.56	CATTTTCGAATCTGTAATTGTATATAATAGAAAGAAAATGGGGGGATCTGA	-9.8	27.5	malA+63
898908	+	46.88	TGTGATTTAACTGCAATCCCCTTGCCGAAATAACGGCAGGGGGATTTTTTA	-24	94.44	catE+41
903734	+	19.44	ATAAATGAGGGAATGCGCCGCATATGACATAAAGTTCATATGCGGTTTTTA	-16.5	50	yfiI+47
905730	+	81.13	CGTTTTGCATATACGCTTCTCTGAAAAGGCCTTTTACAGGCCTTTTTTTCA	-13.3	72.22	yfiK+58
909121	-	126.75	ATGTACCCACATGCAAAAAAACATCTGCCTAAACGGCAGATGTTTTTTAGG	-20.6	35.67	padR+77
910698	+	68.06	TTAATATCTTCAAAAAACAACCTGCTGTCTCCGTTACAGTGGGTTTTTTCG	-11.2	11.59	estB+47
911928	-	111.5	GCGGATGAGAAGTAAAGAAACGCGGCAGGAGCCCTCCTGCCGCTTGTTTTT	-20.2	70.41	yfiR+36
911964	+	39.38	GATCACGCAGGGTGAAAAACAAGCGGCAGGAGGGCTCCTGCCGCGTTTCTT	-23.9	44.44	yfiQ+36
914723	+	23.5	CGCCTTTTCTGAATATCCGCTGTCCGATAAGCGGCTGTTGATCTCATCACC	-10	25	yfiT+263
916078	-	27	AATAAATCAGTAAGTCTGTCATCCGCAAACTGCGGGAGCAGGCTTTTTTTA	-16.8	100	yfiV+46
919329	-	300.44	TAAAAACGAAATAAAAAAAGACTCCGTCTTATTAGACGGAGTCTTTTTTGC	-24	100	yfiY+37
919368	+	15.19	GATTGGCAAAAGCAAAAAAGACTCCGTCTAATAAGACGGAGTCTTTTTTTA	-24.5	87.5	mprF+20
919373	-	19.88	TAAAGCCGCAAACTACCTGCTTGATGATATTGAAACCTACTTCTTAAAAAC	-1.4	48.47	yfiY_CDS
922544	+	73.06	AAATTCTTAATCGTTACACCCATTTTCTTAAAAAAGAAAATGGGTTTTTTT	-15.1	75.76	yfhA+41
924167	+	10.44	GGCGCCGGAAGTGAAAAAACGCACACCGATCCGCGACCGATTCACTGAAAT	-11.9	11.19	yfhC_CDS
924210	+	1179.81	ACTGAAATGTAAAAAACCCCTTGTCTCAAACGGAGACAAGGGGTTTTTCAT	-26.4	81.33	yfhC+39
926778	+	151.44	GCAAGAAAAAGAATAAAGCGTAACAGGAGGCTGATGATCAGCCTCTTTTTG	-14.7	41.29	yfhH+35
928687	+	98	AAGCAGAGGCCTTTTGCATTAAAAACCTGCCGTTAACGACCGGCAGGTTTT	-20.7	83.64	yfhJ+29
930631	+	15.44	AATAAGCTAAAATTTCTCTCCATCCGTCTGTCATAATGGCAGACTTTTTCT	-10.4	65	yfhM+46
931842	+	20.44	GACAAAAATGCACTGAAAATACCAAGCGCCATTGGCAGTGCTTTTTTTGCG	-14.2	4.56	csbB+35
934441	-	154.19	AACTTCAGAAAAAATTAAAGCTCGGCTCTATATAGAGCCGGGCTTTTTACG	-21.3	92.13	yfhP+16
934480	+	109.06	TTTATATAAGACGTAAAAAGCCCGGCTCTATATAGAGCCGAGCTTTAATTT	-17.9	46.15	yfhO+16
936845	+	55.38	CCGTGGCTGTAGTCCGCTTCATTGCGCTTCATTCCGCCGCGCGCTTCAATT	-12.3	0	yfhQ+80
938146	+	10.38	CACAGCAGGTAAGACAGCAAAACCAATCTGCTGAACAAAACAAACAACAAA	-9.4	38.04	sspE_CDS
938206	+	70	CACTGAAACAGAAAAAAGCACTTCATCTTCGGGTGGAAGTGCTTTTTTCTG	-24.7	82.93	sspE+52
938627	+	10.56	CCTTTGTGTAGTGCAGGAATGTGCCATTCCCCGGCCGGAATGGCTCTTTTA	-15.3	9.68	ygaB+40
938805	+	45.88	ACCATTCAAATTCACAGCTATAAGCACAACGGGCTGATTCATAGAATTTGG	-8.1	0	ygaC_CDS
939306	+	17.88	AAATAATGGTTACGTAAAAACCTGTTGCGGGGTACAACAGGTTTTTCACAT	-15	6.28	ygaC+45
941084	+	12.31	ACTCATGGACTATGAGAGCCAATACAAGCACTTATTTACCATTCAAAATTT	-8	16.86	ygaD_CDS
941136	+	400.63	AACTAAAACATCAATCTTATATCCTTTTAACGAAGGATATAAGATTTTTTT	-16.8	93.71	ygaD+45
941142	-	103.88	CTGCGAAATAGAAACAGAAGAGTAACCCGGTTAAACAGCCGGGTTTTTTTA	-15.5	100	ygaE+26
942407	-	281.88	AAAAACTAGAATCAAATACCTTGAACAGGAGCTTTGAGCTCCTGTTTTTTT	-16	94.5	gsaB+42
944922	-	45.63	AAATGTCGAAATAAAATAAGCTGACCGTTTCGTGCGGTCAGCTTATTTTTA	-23.7	42.86	ygzB+37
944962	+	959.88	AGAAAATCATTAAAAATAAGCTGACCGCACGAAACGGTCAGCTTATTTTAT	-21.6	95.18	perR+38
946471	+	33.06	AACGTCGCTGATGCGCTTCTGAGAAAACAAGCTCACAGCGGCGGGAAAATA	-18.5	16.98	ygxA+67
946555	+	42.94	ATGTTATATTAATAAAGTCGCTTCAACAAGAAGTGAAAATGATCTTTGAAA	-7.8	5.48	ygxA+151
946670	+	31.44	TCAGTCAAACTAGGGCCTGCACGACGCAGGTCACACAGGTGTCGCCGCAGG	-17.3	66.67	ygxA+266
946697	+	28.25	AGGTCACACAGGTGTCGCCGCAGGATGCGGTGAACTTAACCTGTGATCCAT	-23.4	31.58	ygxA+293
948316	+	64.31	ATATAAGACCTTGGGTCTTATAAACAGAACGTTCCCTGTCTTGTTTAGTTT	-13.6	60	ygxA+1912
948419	+	14.25	ATCACATTCAATTAGTAATACAAGATATCACATAGTGATTCTTTTTAACGG	-5	50	ygxA+2015
951654	+	1193.69	GCTATCGGCTGTTAACCGATCGGTCGTAGGTTCGAATCCTACCTGCGGAGC	-15.4	0	ygxA+5250
951754	+	13158.4	TGTAGGCGGTCAACTCCGTCTCAAGGGTTCGAATCCCTTGCTCTCCGCCAC	-17.2	32.9	ygxA+5350
951859	+	656	AGACACCGCCCTTTCACGGCGGTAACACGGGTTCGAATCCCGTACGGGTCA	-17.2	3.02	ygxA+5455
951945	+	892.69	TCTGCCTTACAAGCAGAGGGTCGGCGGTTCGAGCCCGTCATCCTCCACCAT	-16.1	0	ygxA+5541
952031	+	3846.56	TCGGGCTCATAACCCGAAGGTCGCAGGTTCAAATCCTGCCCCCGCAACCAA	-18.1	1.62	ygxA+5627
952119	+	5890.44	CCTGCCTGTCACGCAGGAGGTCGCGGGTTCGAGTCCCGTCCGGACCGCCAT	-20.9	2.57	ygxA+5715
952210	+	450.5	GACTGAAAATCCGTGTGTCGGCGGTTCGATTCCGTCCCGAGCCACCACCTA	-12.3	12.83	ygxA+5806
952240	+	29.94	TCCGTCCCGAGCCACCACCTATGCCGGTGTAGCTCAATTGGTAGAGCAACT	-12.6	0.92	ygxA+5836
952243	+	29.69	GTCCCGAGCCACCACCTATGCCGGTGTAGCTCAATTGGTAGAGCAACTGAC	-12.2	0	ygxA+5839
952294	+	763.63	TTGTAATCAGTAGGTTGGGGGTTCAAGTCCTCTTGCCGGCACTGTTTTTTC	-13	1.34	ygxA+5890
952390	+	5737.13	TGTAAATCCGCTCCCTCAGGGTTCGGCAGTTCGAATCTGCCCCCCTCCACC	-13	2.4	ygxA+5986
952471	+	13951.2	AGAGGTCTCCAAAACCTCCGGTGTGGGTTCGATTCCTACTGCCCCTGCCAA	-15.5	11.47	ygxA+6067
952574	+	465.69	GATTGTGGCTCTGGCACTCGTGGGTTCGATTCCCATCAATCGCCCCATATT	-13.2	0	ygxA+6170
952624	+	36.75	TATCATTGGGCTATAGCCAAGCGGTAAGGCAACGGACTTTGACTCCGTCAT	-11.9	0	ygxA+6220
952655	+	712.25	ACGGACTTTGACTCCGTCATGCGTTGGTTCGAATCCAGCTAGCCCAGTCTC	-10.2	0	ygxA+6251
952775	+	2325.75	ACCACCTTGCCAAGGTGGGGGTCGCGGGTTCGAATCCCGTCTTCCGCTCCA	-20.3	3.54	ygxA+6371
952852	+	3406.13	GGCAGAGGTCTGCAAAACCTTTATCCCCGGTTCGAATCCGGGTGTCGCCTT	-15.6	4.51	ygxA+6448
952948	+	2037.44	TCCTGCGGTAGGTGACTACCGTGCCGGTTCAAGTCCGGCCCTCGGCACCAA	-19.8	34.86	ygxA+6544
952985	+	768.63	GCCCTCGGCACCAATTTTACTTACATGGTAAGTTGAATTGGTGTTTGTGTT	-18.4	50.27	ygxA+6581
953038	+	548.13	ATCATTATAACTAATCATATTAATGATCTACATAAGTAGATCATTTTTTTA	-11.5	81.78	ygxA+6634
953295	+	18034.4	CTCAAAATCGTGTTCCTTCTGGAGTGTCGGTTCGACCCCGACCACCGGTAT	-11.6	83.57	ygxA+6891
953298	-	138.06	TTTCTTTAATAAAAAATAAAAACCCGTTTCTGTTAAGAAACGGGTTTTTCA	-19.2	0	spo0M+75
953335	+	946.38	ACCACCGGTATACTGAAAAACCCGTTTCTTAACAGAAACGGGTTTTTATTT	-19.1	95.56	ygxA+6931
953342	-	212.75	TAGACCAATACGCTGAGTAAGTATAAAAAGGAGCCGAGGCTCCTTTTCTTT	-15.2	44.09	spo0M+31
955754	+	775.69	CTTAACCCTTTGGACCTGATCTGGTTCGTACCAGCGTGGGGAAGTAGAGGA	-17.4	21.11	ygaJ+169
955789	+	49.06	GTGGGGAAGTAGAGGAATTGTTTTTGTTATTGTCTTGCTGGGCAATAATAT	-10.4	1.06	ygaJ+204
955838	+	2229.81	ATGTTTCTTTCTGACTGTAACCGGGTTCATTTATATGAATCCGGTTTTTTG	-16.8	76.61	ygaJ+253
959493	-	170.69	GATTCTTAATGGAGAAATGCAAAAACCCGTTGTAGTCAGCGGGTTTTTTTA	-18.8	94.74	katA+42
961353	+	21.13	GACCGCCGAAGGCTCTCATCTCTACAAGAACAGAGATGGGGGCCTTTTTGT	-25.3	100	senS+1845
966744	-	25.75	AAGACAGACTGTGGCAGCGATTGAAAAAGGCGATTATGTTCCCTCACTGCT	-8	3.42	ygzD_CDS
967139	+	21484.6	CTCAGCCTTCCAAGCTGATGTCGTGAGTTCGATTCTCATCACCCGCTCCAT	-11.4	47.57	rpsN+961
967198	+	2094.94	TATTAACGCAGTGTTTCGTTTCTCAGATAAACGAAGTATTGCGTTTTTTTA	-17	29.73	rpsN+1020
967201	-	12.63	ATACAGTACATTGGCTTACGTAAAAGAACACGAATACCGTGTTCTTTTTCA	-13.5	0	yhzB+28
967269	+	15.13	TCGTGTTCTTTTACGTAAGCCAATGTACTGTATGGGTGCCGCCGTGAATTT	-7.7	2.54	rpsN+1091
967445	+	289.69	TTTTTGAAATCGCCAAAAATGCCGTTTTCATCAGAGAAAAGCAGTATGTTT	-8	0.1	rpsN+1267
967564	+	11.06	AGAATATTTTAATGCGAAAAAATCGATTGTGTCATGGGCCGAGTCTTTACT	-4.4	0	rpsN+1386
967739	+	18.81	ATACCGCCGTCCGCATAGTCGAAAAACAAGGATTCTTGAAACAGGCGGAGT	-12.2	8.85	rpsN+1561
967929	+	61.63	CAACCTATTATAAACGCTGTGTCGTTTTATCACAAAGAAAGGAGGCTGTGC	-9.7	5.42	rpsN+1751
968226	+	12.31	TGAAGGATGCGCCGAGAAGCACGAGAACTGAGCGCAGGGGCATTTTTTGCA	-14.2	0	yhbA_CDS
968822	+	24.63	AATCGGGAATTTAAGGAGAAATTCGGGCATGTCTCAGGTTCTTGGCGCGGA	-8.5	0	yhbA_CDS
969152	+	65.69	TATAGAGCAGAAGGAAAAAACACTTGAGATCATCCAAGTGTTTTTTCTCTA	-16.8	0	yhbA+57
970317	+	12.44	GATAAAATGCTGAAGCGTGCCGGACTCGATTATTGGGAGTTTGTTAACGTT	-11.2	0	cspR_CDS
970615	+	22.25	CGATTCTTGTTTATGAAGCGCTGCGCCAGCAAAATTACCGTGATTTAAAAT	-6	25	cspR_CDS
970656	+	244.25	GATTTAAAATAGTGAAAAACCCGCTCATCGATGATGGGCGGGTTTTTTTGC	-23.3	98.72	cspR+39
972822	-	548.19	AGCCTGGAAAAGAATAAAAAAGGGTGCTCCTGAAAGAGCACCCTTTTTGTA	-20.9	92.39	cspB+11440
972859	+	15.69	CATTGTTCTGTTATACAAAAAGGGTGCTCTTTCAGGAGCACCCTTTTTTAT	-21.6	33.33	yhbF+53
980359	+	94.31	AGTAATGAAAAAGGCAAATCCGTTTACTCATGCGGGTTTGCCTTTTTTGCT	-24.4	100	yhcD_CDS
984170	-	228.44	TTTTATTTTGACAAAAAAGCTGTTTTGCATAAGCAAAACAGCTTTTTTTAT	-20.6	95.56	cspB+92
984211	+	56.19	TGCAAACTAATAAAAAAAGCTGTTTTGCTTATGCAAAACAGCTTTTTTGTC	-21.7	0	yhcI+41
984214	-	32160.8	TAAGCATAAATTGATATGAAAAACTGCAGGTGCAAACCTGCAGTTTTTATT	-20.5	98.4	cspB+48
984251	-	504.5	CCGCGGACCACAAGCTGCTAACGTTACTAAAGAAGCGTAAGCATAAATTGA	-9.6	5.31	cspB+11
984433	-	76.25	GCTTTAGGAGGAAATTTCATGTTAGAAGGTAAAGTAAAATGGTTCAACTCT	-3.7	0	cspB_CDS
985701	-	14.06	TCAGAAAAAAAAGAATGAATTCAATGTTCGAATTCATTCTTCCAATCTGAA	-17.6	0	dgcK+33
985748	+	77.38	TCTTTCAGATTGGAAGAATGAATTCGAACATTGAATTCATTCTTTTTTTTC	-15.8	24	yhcJ+17
985911	-	15.44	CTTGATAAAGCAGCCCGGATCGCTGAACGGATCAGGAGCACTGTAAGTGAT	-11.8	0	dgcK_CDS
988419	+	147	GAAGCGTAACATATGAAAACGTGTAATCCAAGAGGATTACACGTTTTTTTA	-20	81.54	tcyP+42
989628	+	69.5	CTAACGCTGAATAAATGAAAGAAGCCGCACAATTTGTGCGGCTTTTTCTTT	-19.2	90	yhcN+37
995589	-	18.63	CACATATTTTTCATGAAGAAAAGCCGCAGGCACTGCCTCGGCTTTTTAAGT	-17.7	29.03	yhcT+35
999981	+	13.56	ATATAAAAAATAATTCCCAAAAAACCCGCCTGAATTGGCGGGTTTTTTTAA	-19.2	80	yhcX+38
1000235	+	28.75	TTTGCTTTGGAAGCTGCATCCTCTTTCTTCTTGAGAAAGGGGATGTTTTAT	-22.2	36	yhcX+292
1002447	+	263	CTTTACGGCAAATGTTTATGCACCCGTAAAGCGGTTTGTTGTGGTTTTTTT	-12	13.22	glpP+125
1004945	+	91.81	CACAGCACCAAAGTGTAAGCATGCACTTTGGCTGTTGTGGTCTCTTTTTCT	-23.1	1.32	glpK+111
1006676	+	111.69	TACCGCTTGAGCAATAAATCATAACGGGCTGTCTGCAGCCCGTTATTTCTT	-18.2	33.33	glpD+34
1008562	+	518.44	CAAAATAATTCAAGTATGAGCTGGGTCATTGTAAATGATCCGGCTTTTTCT	-17.5	89.02	pgcA+43
1010948	-	22.81	GCCCTTCTCACATAAACAAATCCCGGCGTTTAGACGCCGGGATTTCCTGCT	-20.3	42.31	yhdB+36
1010986	+	33.25	CATGTTCGCAAAAGCAGGAAATCCCGGCGTCTAAACGCCGGGATTTGTTTA	-23.4	26.79	yhdA+17
1011750	-	1880.13	TATTTCTAAAAACAGAAACTGTGCGGCCTTAACGGCTGTACAGTTTTTTAT	-21.8	53.58	lytF+42
1011942	-	21.63	TGGAACACAATGAAATCAGTTAGCCAGCCTGCTGTCGGAGATTTCGTTTTC	-9.8	0	lytF_CDS
1012645	-	10.25	AAACAAAGTCAATATGTCCATCGCTGAATTGAAGGTCTTGAACAACTTAAA	-4.2	0	lytF_CDS
1012694	-	10.06	CTACGGGAACATATAAGGTGCAGCTTGGAGATTCACTTTGGAAAATTGCAA	-5.3	0	lytF_CDS
1012873	-	20.88	GGTGCAGGAACTGAAAAAATTAAACGGACTAAGCAGCGATTTAATTCGTGC	-5.3	0	lytF_CDS
1013389	-	185.25	TCATGAAGCTTTTAAAAATGAAGGAATAGATTAAGATTCCTTCTTTTTTTA	-10.9	74.36	nsrR+22
1013446	-	13.38	ACCTCGCAGTTTTAGACAAATACACACTGCGCGACCTCGTCAAAAACAAAG	-8.3	16.71	nsrR_CDS
1017052	-	44.69	TTTTAAAAACTGGAAAATAAAAAGGATGCAGAACGCTGCATCCTCTTTTTT	-14.5	83.78	phoA+31
1019583	-	10.56	TTTGCTGCTTGAAGACGATGAAGATGAAGCAGGTTTTGAGCTGCTTGTGCT	-9.1	9	citR+490
1020042	+	199.63	AAAGATTCTAATTTTTAGAGAAAACCCGTTCATTGGAACGGGTTTTTTTCA	-19.7	92.86	lytE+40
1021495	+	20.69	AAAGATGGACGCGCGGTGAACAAGCAATTGCACCTTCTTCCCAGTACGGAC	-8.2	9.32	citA_CDS
1023136	+	55.63	TTTATTTCAACGTAATCAACGAAAAACCAGCTCAAGAGCTGGTTTTTTGTG	-18.9	94.12	yhdF+36
1023584	+	23.75	CGATTTCATTTGTTGTGGCGGCGTTGGCTTGTTTATTCGCCGCCCTGTCTT	-14.9	2.2	ctrA_CDS
1024790	+	62	ATCAATAACCTTTTGATAAAGAGAGCGGCCATACAGGCCGCCTCTTTTCTG	-22.5	17.86	ctrA+43
1026253	+	20.69	GGAATTTTATCATTTTAAAAAACAGGCTCCGTTTCCGGGGCCTGTTTTTTA	-23.3	100	yhdH+33
1028203	-	79.25	AATTTACAGTTTGGCTTTTAAAAAAGACGCCTTTTCAGGCGTCTTTTTTCG	-16.9	96.77	yhdK+30
1028235	+	12.13	TTCCGAAAACCGGTATAACGAAAAAAGACGCCTGAAAAGGCGTCTTTTTTA	-21.1	100	yhdJ+33
1028235	-	14	TTTGTGTGTATACCATTGTATCTGTAGATACGAATTTACAGTTTGGCTTTT	-7.9	37.11	yhdK_CDS
1032028	-	477.5	CCAGCAGGAAGCATAATAAGAAAAGCACCTTGTATAGGGTGCTTTTCTTAT	-21.7	72.82	yhdP+35
1032058	-	32.75	TCAAGAAGAAGAACTTCTGGAGACAGCTAACCAGCAGGAAGCATAATAAGA	-7.8	23.04	yhdP+5
1032065	+	69.63	TGAAACTGTGAAAATAAGAAAAGCACCCTATACAAGGTGCTTTTCTTATTA	-20.5	33.67	plsC+71
1032478	-	23.56	TATCATTCATGTCATTGAATCTGCGCCGATCCAAGACCTGCTTGTCAAAAT	-7.1	0	yhdP_CDS
1032520	-	17.06	TGAGGTATCTGTTGATTCCACCATTTCTCAATTCGTCAACCCTATCATTCA	-4.6	0	yhdP_CDS
1032786	-	14.88	TTGTCTGAAAGCTATAAAAGCGGTGAAATCAACCAATCAGAGTTTAAATAT	-5.8	0	yhdP_CDS
1033080	-	18	GTCCAAATGAACGTTCCAGGTTCCCTTTCACATGTCATATCGTTTATTTTT	-4.9	0	yhdP_CDS
1033098	-	21	CTGCTTCACCCGCTTTTCGTCCAAATGAACGTTCCAGGTTCCCTTTCACAT	-2.7	3.25	yhdP_CDS
1033234	-	13.63	CGCGGAAGGAAATAAAGCAGCAATAGCCGTAAAAAAAGTGACCACGCATCT	-4.4	9.1	yhdP_CDS
1033246	-	11.94	CGATCAGCTGATCGCGGAAGGAAATAAAGCAGCAATAGCCGTAAAAAAAGT	-7.3	8.72	yhdP_CDS
1033328	-	27.19	TTTTAGTTGCTGTTTTAATCGCCCTGACGGCATTTTTCGTGGCATCTGAGT	-10.3	0	yhdP_CDS
1033630	-	24.75	GTCCGATATTAAAGATCGACTGGAGAACCAGTTTCCCTCTTCAGCTAAACT	-9.5	0	cueR_CDS
1033669	-	10.94	TATATTTATTGTAGATTGCAAGAAGCAGCGATTGGCCCTGTCCGATATTAA	-5.9	0	cueR_CDS
1035274	+	41.38	TTAAGAAGGCAAAGAAAAGAAAACAGTTTTCAAGGCTGTTTTCTTTTTATA	-15.8	5.38	yhdR+47
1035539	+	107.5	ATGTTAAGGAAAAATGATTATATCAGGAGGTGACTCCTTATCCTTTGTTGA	-8.1	0	yhdR+312
1035728	+	11.06	GAAACAAACGGGCGATACTCGCAAGGCGTGTCATTACAGATTTGGATGAAT	-7	0	yhdT_CDS
1035993	+	28.31	AAAGGCAGAACAGCTGACTTTACTGATAGCGGGCCCTTTGCGTTTATTCTA	-9.9	16.91	yhdT_CDS
1036126	+	15.94	GAACATGATGGTTCCCATTCTGAGGAAGAACTCAGGATGCTGTTATCTGAG	-16.2	19.1	yhdT_CDS
1036143	+	12.5	TTCTGAGGAAGAACTCAGGATGCTGTTATCTGAGAGTTTAAAAAACGGAGA	-11.6	0	yhdT_CDS
1036148	+	13.69	AGGAAGAACTCAGGATGCTGTTATCTGAGAGTTTAAAAAACGGAGAGATTA	-8.7	0	yhdT_CDS
1036162	+	11.88	ATGCTGTTATCTGAGAGTTTAAAAAACGGAGAGATTAATCCGTCTGAATAT	-7.5	0	yhdT_CDS
1036167	+	12.75	GTTATCTGAGAGTTTAAAAAACGGAGAGATTAATCCGTCTGAATATAAATA	-6.2	0	yhdT_CDS
1036644	+	10.44	ATTTGATGAAGATGAACAGCCGCTGATCCAAAAGCTTGGCGACGGCCATTA	-10.2	3.35	yhdT_CDS
1036741	+	14.63	GGCGCATCGATTCAAGAAGACGTCGATACGATCGGCGGGCTGATATTAAAA	-10.3	1.31	yhdT_CDS
1036864	-	18.75	TTCAGCATCACAGGCTCGGGCAGCGGCAGCTTGTGGTGCGCCGTAATCCCG	-20.3	9.6	crcBA+89
1036955	+	625.06	TGATGCTGAACAGTGCAACCTTGAGCGAGAAATAAGCTCAAGGTTTTTTTA	-17.9	89.49	yhdT+16
1037479	-	14.94	GGCCTCTGCTGTCGGCTTTTTTAGGCACCGGCTTTTGCGGAGGCTTCACAA	-21	0	yhdV_CDS
1037502	-	10.63	ATTTTTTATGATCGGGGCAAAACGGCCTCTGCTGTCGGCTTTTTTAGGCAC	-11.6	0	yhdV_CDS
1037641	-	22.75	ATAGCGCGGTTTTTATCGGAGGCGCGCTTGGCGCCTGCCTCCGATACGGAT	-23.9	0	yhdV_CDS
1038793	+	24.56	ACGAAAAAAGGTAAGTGACTGTCCCTATTGAATCTGGCTGATAGATGAATT	-4.1	30.95	yhdX+33
1038827	+	452.81	TGGCTGATAGATGAATTGAGAAATGACCCCGGCGTTTCGCCGGGGTTTTGT	-19.5	77.48	yhdX+67
1040062	+	74.75	GGAACGGGCTTAAAAGAGAGACTTCGTCTGACAGAGGCGGAGTCTTTTTCA	-19.9	47.92	yhdY+38
1040069	-	12.25	TGTAGAATACTTTTGAATGTTTCCAACTCAACACCGCCTTTTTCTCTTATT	-0.2	0	yheN+792
1040412	-	28.88	TGTCTGGATAGAACCATGCAGTTCGTACACATGCCTGCTCCCCGCTTTTTT	-6.8	0	yheN+449
1040509	-	96.5	AAATGTCCCCATTGTTTCCGGCCGCCGTGCACTCCGGCACCTCCCGCTCCA	-7.2	17.37	yheN+352
1040825	-	268.63	CCTGTTCATGAATAAAAAAGTGAGGCGCATAAAGCGGCTCACTTTTTCATG	-20.7	0	yheN+36
1040865	+	18.19	GAAGTTTGGGCATGAAAAAGTGAGCCGCTTTATGCGCCTCACTTTTTTATT	-19.7	12.99	yhdZ+28
1041012	-	15.25	ATACCGGAATTCACAGTATGTGACCGCCGTATTACAGCAGCTTGAGAATAT	-8.4	0	yheN_CDS
1041269	-	13.38	AGAGCAGAAAAGGAAGGCCACGCACTCGGTTTACATGGCGTTACCCACAAT	-7.2	4.86	yheN_CDS
1041372	-	19.19	AGCCGTTACAACCCGCTTGCTCGACGTACTGAAAAGCGCTGATGTAAAAGC	-10.4	0.15	yheN_CDS
1041380	-	22.13	GGCCCTTCAGCCGTTACAACCCGCTTGCTCGACGTACTGAAAAGCGCTGAT	-9.8	0	yheN_CDS
1041671	-	27.19	GGAGAGATTGTTATGCGACAAACGAGAGGAGAGGCTTCTCCTTCTGCAGTT	-12	0	yheN_CDS
1042849	-	14.88	TTTGTTAAAAAATAAAAAGAGCCCCGCTGTAAAAAGCGGGCTCTTTTCTTC	-21.4	60.61	nhaC+36
1042889	+	394.38	ATAAATGAACGAAGAAAAGAGCCCGCTTTTTACAGCGGGGCTCTTTTTATT	-20.7	41.33	dat+47
1044382	+	30.13	TTCACAATTATGAATATAAAAGAAGTGAGCACAGGGCGTGCTCACTTTACA	-17.3	29.46	dat+1540
1045185	+	342.25	TAACATATCGGTTAAAAAAGGCATGGAGCTGACGCTTCATGCCTTTTTTAT	-24.3	49.32	yheJ_CDS
1046023	+	12	ACGATGTTCGCCGGTTTAATGAAATGACCGCTGATGTTTATCAGAAAAATA	-9.5	0	yheI_CDS
1046089	+	12.19	TTGATTCACTGTTTGAGCCGACGGTAAAACTGCTTGTCGGCGCAAGCTATC	-19.6	0	yheI_CDS
1047340	+	11.25	CAGAGAGGACCGATTGCAGGAGCCTGTTTCAAAAGCAAAAGAAGCGCATAT	-6	2.24	yheH_CDS
1047783	+	13.88	GGGATTTATATGTCACAGTGCTTTCAACATTTGTGACAAGCGGAATCTATA	-14.2	0	yheH_CDS
1049135	+	553.25	ATTGCATAACGCTCAAAAACCCAAAACAATCGTGTTTTGGGTTTTTGGTTT	-21.3	24.89	yheH+42
1050016	+	37.44	GAAAAAAGGGTGACAAAATAAAGAGAGCGCGGAAACCGCGCCCTCTATAGC	-16.3	4.6	yheH+923
1050416	-	88.06	ATGCTTTTTCATATTTATGACTAGCTTAGCCTAAACGGCTAAGCTTTTTTT	-14.8	100	yheE+27
1050449	+	86.94	GGTAAATCTTGAGAAATAAAAAAAGCTTAGCCGTTTAGGCTAAGCTAGTCA	-15.7	23.66	yheH+1356
1055100	-	15.19	TTTGCTGAGTGAATAAAAAATCCCTTCTTATCCAAGAAGGGATTTTGCTTA	-17	36.36	yhaZ+43
1055137	+	405.25	TGTTGAAGGCTAATAAGCAAAATCCCTTCTTGGATAAGAAGGGATTTTTTA	-18.5	69.6	yheA+38
1056512	+	81.63	ACAGAGAGTAAGTGTTCGGAGCGCATCATTGGTCAAACAAGGGGTTCCTGA	-7.5	4.42	yheA+1413
1056580	+	1827.81	ATCGAAATAACGATATTAGGGAGAATGGCTGCTTCGATCGTATCCTATCAA	-6.9	67.22	yheA+1481
1056620	+	254.06	TATCCTATCAACAAGCCATACATAAAGTCTGCTGAGCCAGGCTTTTTTTGC	-7.6	15.32	yheA+1521
1057610	+	90.38	CGTGTGTAAAAAAGCCGCTCGCGCCCTGACAGGTGCGGCGGCTTTTTTGCC	-31.5	51.43	yhaX+42
1059205	+	112.75	GATTTTTGAAAAAACGACAAAGCAGCACTGATTACAGTGCTGCTTTTTTTA	-19.2	91.67	hemZ+20
1060925	-	13.75	TTATTTGTAACTCACCCCATACTGCCAACACTACATTCGGAGGGATTTTCA	-3	14	khtS+63
1064488	+	10.5	CGATGACGCTTTTGGTTGTCGCCGGTTTTATGATCGCGATGTTCGGTTTGA	-11	0	natB_CDS
1064777	+	69.88	AGCGAAAAACTGATTGGAAAACAGCCTGGGGATTCTCAGGCTGTTTCTTTA	-20.1	34.48	natB+38
1065447	+	10.94	ACATGACGACCTCGTGAAAAGCGGGATGGATTATTGGGCGCTTGGCCATAT	-10.3	0	yhaO_CDS
1070032	+	327.38	AATAACTTAAAAAGGACTGATGCTGACATATTCAGCTCAGTCCTTTTTGAT	-25.6	55.79	yhaM+46
1070325	-	28	AATTCTAAATAATAAAAAAAGCTGTGCGGCTCATTGAGCCGCACAGCTTTT	-28.1	100	prsA+39
1070356	+	12.63	AACCATTCCATCGCATAAAAAAAGCTGTGCGGCTCAATGAGCCGCACAGCT	-25.4	87.5	yhaL+33
1070369	-	20	TTAATACATCTTCAACAAGCAACAGCACTTCTTCATCTTCAAGCAATTCTA	-1	69.82	prsA_CDS
1070393	-	13.19	AAGATAAAGATCTGAAAGACACATTTAATACATCTTCAACAAGCAACAGCA	-2.1	39.63	prsA_CDS
1070423	-	11.56	AAGTCATGAAGAAGGCTGACATCGAAGTAAAAGATAAAGATCTGAAAGACA	-4.4	28.64	prsA_CDS
1070581	-	13.44	AGGTGAAGTCAGTGATCCTGTCAAAACGCAATACGGCTACCATATCATTAA	-5.4	0	prsA_CDS
1070599	-	10.19	TGCATTCAAATTAAAAACAGGTGAAGTCAGTGATCCTGTCAAAACGCAATA	-4.7	0	prsA_CDS
1070931	-	21.81	CAATATACTGCCCTCGAAAAGCAATATGGCAAAGATTACCTGAAAGAACAA	-3.2	0	prsA_CDS
1070949	-	16.06	AAAACGCAGCTTGGCGATCAATATACTGCCCTCGAAAAGCAATATGGCAAA	-7.4	11.82	prsA_CDS
1071110	-	17.75	TCGCAAAAACAGACGCAGGCGATGTCACAAAAGGCGAGCTTTACACAAACA	-7.4	1.42	prsA_CDS
1071705	-	106.13	GTAAATACGAAAGAAAGCATAGCTGCTGATTAAGCAGCTATGCTTTTTTAT	-26.1	33.33	yhaJ+337
1072344	-	16.31	GTTTGCTCGTCGTTATTTTATTTGTACATAAAGTCATCCATGTCCTGCCAA	-1	15.48	yhaJ_CDS
1072839	-	38.75	TCCTTGCTCAGCCCTTTATCAATGAGAAGCGCATAGAAGGGGTACCTGTCC	-9.7	47.06	hpr+267
1072941	-	277.19	AAAAGCGCAAGGAGCTTATCAAAGGTTACAAATCCTTGCGCTTTTTGTGTT	-19	10.16	hpr+165
1073004	+	17.06	CAAGGATTTGTAACCTTTGATAAGCTCCTTGCGCTTTTTGCCGGACAGCTG	-10.4	0	yhaI_CDS
1073168	+	16.19	AGGTTCGAGCTCTTCAGCCGGTTCATCCGCCGCACTGTCCTTTGCTTTTTT	-9.2	0	yhaI+59
1073200	-	13.69	CGGCGATGATTTTATGGAAATTTTCGAAACGTCACTCACCAATATTGACAA	-7.2	0	hpr_CDS
1073285	+	25.81	CATAAAATCATCGCCGTAGATATGGCGTATCATACACATCATTTCTGCCAC	-8.3	28.18	yhaI+176
1073360	-	14.63	ATGTCCAATTGACTGAGGAAGGTACCGAGGTATTCTGGAGCTTGCTTGAGG	-9.7	0	hpr_CDS
1073579	-	11.38	CGATCGAGAAGGATTGGCAGCAATGGCTCAAACCGTATGACCTGAATATTA	-9.1	4.25	hpr_CDS
1073842	-	653.75	TCCTATTCAAAAGAAAAAAATGCGGGCCAAAATTGGACCCGTATTTTTTTT	-20	96.86	yhaH+53
1073874	-	50.06	AGACAGCTGGAGAAAACCTTACAAAACTAATATCCTATTCAAAAGAAAAAA	-0.8	16.19	yhaH+21
1073886	-	52.06	GAAGAGAAAATCAGACAGCTGGAGAAAACCTTACAAAACTAATATCCTATT	-1.7	25.22	yhaH+9
1074136	-	11.25	TCTTCTTACTGCACCTTCCTCAGGAAAGCAGCTGCGTGAAAAAATGAAAAC	-7.1	0	yhaH_CDS
1074358	-	28	AGGATAATACAATCAAAAAGACAGACAACCTTCTCCCTCCTTTTCACTTAA	-2	0	trpP+288
1074603	-	824.75	CTAAATAATTGTCACACAAAACCTCTTCCGCTTCCGGGAGAGGTTTTTTTG	-18.5	9.51	trpP+43
1074761	-	35.06	TCTATCGTCAGCTTTATTGATCGTCGGTTTACCGGGCGGTTTCGCCGCATT	-12.7	4.35	trpP_CDS
1074821	-	12.38	GAAAACAGGTGCAGCCGCTGTGCTGACAGTGATCGGGACCATCTTATCAGG	-10.6	2.24	trpP_CDS
1074928	-	41.25	TCCGCGCTTACAACCGCGTTTCCAGCCGGACAGATCCCTAACATCATTGAT	-7.7	0	trpP_CDS
1075099	-	13.63	TTAGTCATTATGGCTCTGTTTGCCGCAATCGGCGCAGCGCTTCATTCCATT	-12.9	0	trpP_CDS
1075364	-	19.56	ATGATCGGCCTTGGCGGACACCGTTCGGTGGGAGGCTGCCGCGCTTCTATT	-15.3	0	serC_CDS
1075452	-	10.13	AGACAGCCGCTCACGCATGAATGTCACATTCACGCTTCGGGATGACGAATT	-10.4	0	serC_CDS
1075643	-	11.63	ACGCATGTCAAAGCGGATTCACTCTACAACACTCCGCCGACATTTGCGATT	-14.5	0	serC_CDS
1075945	-	11.13	ACAATTACAGTTATATTCCAGAGGTTGACCTTACGGATGTAAAAGACGGCG	-9.1	17.54	serC_CDS
1076501	-	288.06	CTCTTCCTCTATCGCAAAACGCCTGGCCTCATCATAAGATGAGGTTATTTT	-15.3	63.31	hinT+14
1080111	-	316.13	CATCAGCTATAAAAAAACAGCCGGAGTGTTTATTCTCCGGCTGTTTCCTTT	-21.4	73.94	yhaA+39
1080152	+	24	GAGGATATTAAAGGAAACAGCCGGAGAATAAACACTCCGGCTGTTTTTTTA	-24.5	38.1	ecsC+20
1080317	-	15.63	TTCAGCAGGTCATTGACGGTGAACCACAAATGGGCGGCGAGGATTTTGCTT	-10.6	0	yhaA_CDS
1081085	-	29.94	TAGAAGGAAGCGAACCCGGCCCTACAGTCGCTTTGAGGGCCGACTTTGACG	-17.7	6.94	yhaA_CDS
1083202	-	321.75	ACCACATATTTCGCTGTCGAATAGCTGCCGGCATGTCCGGCAGCTTATTTT	-19.5	43.33	yhgC+27
1088265	+	24.5	CATGTAGTCATCATCGGCGGCGGCATTACCGGTTTAGCCGCCGCCTTCTAT	-21.6	0	hemY_CDS
1089639	+	123.75	CTTACCTATTTATTCAGCTAAAACCTCCGCTTTATCGCGGAGGTTTTTTTG	-17.8	92.86	hemY+30
1090346	+	10.81	AATTGTATGTTGTCAAAGGATTGTCAGCGAACTAGATAATCCTTTCTCTTT	-12.4	0	yhgD+16
1092728	-	27.13	GGGATGTAACAAAAAAAGAACTTGTTTCCAAGGAAACAAGTTCTTTTTCTT	-19.6	69.57	fabHB+42
1092769	+	104.06	GGCTTCATAAAGAAAAAGAACTTGTTTCCTTGGAAACAAGTTCTTTTTTTG	-20.6	88.1	yhgE+41
1096520	-	351.44	TTTCTGGTTAATGAAAAGCCTGCGGGGTTCTTGCCCCGCAGGCTTTTTTAA	-30.5	96.06	gltT+40
1096561	+	62.81	TGTTAAAGATTAAAAAAGCCTGCGGGGCAAGAACCCCGCAGGCTTTTCATT	-27.3	52.78	yhfF+38
1096883	-	10.06	ACGGTTCCGTTCTCTATCAATCTATTGCCGCACTCTTTTTAGCACAGGTAT	-2.9	17.69	gltT_CDS
1097162	-	14.06	AATTCGGACTCGGTTCTCTTATCTCTCTCGGAAAGCTCGTCGGATTGGTTT	-7.1	0.04	gltT_CDS
1097308	-	10.5	ATTGGGTATTTCCGCGATCGGTGAAAGAGGCAAGCCTGTATTAGCCTTTTT	-11.3	0	gltT_CDS
1097526	-	13.44	ATTCTCGGACTAGCCCTTGCAAACATCTTCCATCCGGGTACAGGAGTTAAT	-5.7	0.21	gltT_CDS
1097582	-	14.13	GTAAATTAGGCTTCAGAACGATTCTGTACTTCGAGATCATCACGACTTTTG	-4.4	0.63	gltT_CDS
1097729	-	11.38	TCATTTGGTATGGCAACCCAGCATTGCCTACTTACCTGCAGCCAATCGGGG	-11.1	39.95	gltT_CDS
1098080	-	18.94	ACGATTTGTAATGAGCGAAAATCCCGCGCCTTACGCGTGGGATTTTCTTAT	-21.7	88.89	yhfH+40
1100905	+	187.63	AAACTATGACAGTACTGACACTCAGGGCTTTTTGCTCTTGAGTGTTTTTTT	-16.5	98.8	yhfK+42
1104385	-	15.63	AGCTGCACAATAATAGTAAAAAGAAGCAGGTTCCTCCATACCTGCTTCTTT	-18.6	50	aprE+38
1107561	+	75.44	CTTTAACAGGATCAGCTTGCAGAGAATGTTATTTTTCTGCAAGCTTTTTTG	-21.2	27.45	yhfP+45
1108326	+	13.44	CAGAAAATCAGCGCGAACAGCCAGTCCGTGCTTTTGATCGGAAATACAAAT	-8.8	0.26	yhfQ_CDS
1108395	+	14.38	GATGAAAACTTCTTTACATCGAGACTTTTAACACAGGTCGGCTACCGATAT	-7.2	0	yhfQ_CDS
1108703	-	87.5	TCCGGCTTTATCAAATAAGAAAAAGACAGGCGTTTGCCTGTCTTTTCTTTT	-18.7	61.54	phoE+33
1108713	+	11	TTGGACGAGCTTCAAAAAGAGATGCCGGCTGCTAAGAAATAAAAGAAAAGA	-4.3	46	yhfQ+9
1108738	+	599.31	CGGCTGCTAAGAAATAAAAGAAAAGACAGGCAAACGCCTGTCTTTTTCTTA	-19.2	85.59	yhfQ+34
1112581	-	827.88	ACAGAAGAATAACCATCAAAAACCGGTCTGCCATACGGCCGGTTTTTTTGC	-14.8	99.21	hemAT+39
1112602	-	13	GTTGATTCGCTTGTCATCCTGACAGAAGAATAACCATCAAAAACCGGTCTG	-9.4	38.26	hemAT+18
1112790	-	10.31	TCAAAGACGTGAATGAGCTAGTCAGCGAAAGTAAAGAAAAAATGACGCAAA	-3.7	13.24	hemAT_CDS
1115836	-	17.19	TTTTGCGAATAACACCGAGACAGCGCGTCCAATCCCGCTGTCTCCTCCAGT	-14.4	0	yhzC+747
1116554	-	1013.13	AGCGCTCAAGCAGAGCGAATAAGCCAATCCTTCAAGGATTGGCTTTTTATT	-23.3	69.63	yhzC+29
1117731	+	79.19	GTATTAGAAAAATAGGAAGGAGCTGACCGAACAGGGCAGCTCCTTTCATAA	-22.8	17.76	comK+44
1119121	-	78.81	GGCGGCCTAAGCATAAAAAAAGCAATCTGGACACCAGATTGCTTTTTCTTA	-19.8	68	yhjB+41
1119159	+	169.06	GTGAACGGTAAATAAGAAAAAGCAATCTGGTGTCCAGATTGCTTTTTTTAT	-20.1	77.95	yhjA+40
1122714	+	11.56	ATTTCTGATGCCGAATAAAAAGACGCTAATTGAAGAGGCGTCTTTTTGTAT	-15.2	45	sipV+33
1124961	-	35.81	AAAAGATAGAAACAAAGCGAAAAACACGCACCGCAGTGCGTGTTTTTTATT	-17.2	77.78	glcP+162
1124996	+	65.56	TTCCTAGCATTTTTAAATAAAAAACACGCACTGCGGTGCGTGTTTTTCGCT	-17.6	89.47	yhjH+31
1130738	-	76.69	ACGACTTACGATTGAAAAAGAGGTTAAAATGAATAACCTCTTTTTCTTATA	-15.8	48.98	yhjN+180
1130781	+	11.75	ATCTTTATATAAGAAAAAGAGGTTATTCATTTTAACCTCTTTTTCAATCGT	-17.2	26.67	yhjM+77
1143554	+	56.13	AGCGAGATCCATAAGCTCCGGAATTTCAGGCGGAGCGGGTCTCGTTTTCTA	-23.9	8.15	addA+49
1148499	+	129	AAAAAATGACTAAAAAGCAGCCCTCTCTTTGCAGAGCGGCTGCTTTTATCC	-20.4	67.03	yisB+42
1153666	+	405.25	TTTTAATAGAAAAACCTATGAACCCGGCTCTTTGATAGAGCTGGTTTTTTT	-15.7	83.77	yisL+45
1154011	+	56.44	AATGGTACAAAGTGACCCCGGGAGCAACGGATATTCAGAAAAACTCACATA	-6	7.76	wprA_CDS
1154063	+	11.63	GGCACTGACCGTAAAGAGTGATTCAGTACTGAATGTATCTGTATATCCAAG	-5.9	0	wprA_CDS
1154075	+	10.94	AAAGAGTGATTCAGTACTGAATGTATCTGTATATCCAAGTAAGGAAAAAGC	-7.2	5.49	wprA_CDS
1154085	+	18.38	TCAGTACTGAATGTATCTGTATATCCAAGTAAGGAAAAAGCGCTTAAAGAT	-5.5	16.49	wprA_CDS
1154345	+	18.69	GGAAGAAGCTTGTCCGGTTGAAATGAGTGTCGATCAGAAGAAATCAGGAAA	-5.9	0	wprA_CDS
1154408	+	11.88	TAAGTTGAGATCGATTCGTGATGAGCAGCTGAGCCAAACAGCAGAAGGCAA	-8.1	6.79	wprA_CDS
1154483	+	31.25	AGCAGCACCGTTTATCGTTGCAAAGCTCGCACTCAATAAAACAGCAAGAAA	-7.1	4.3	wprA_CDS
1154697	+	17.56	AAGAAACAAGCGGACCGACTAAATATGAAGCAGCTGCAAGGCAAAACAGCA	-4.5	18.26	wprA_CDS
1154723	+	10.19	GAAGCAGCTGCAAGGCAAAACAGCAGGAGCCATTTTAACAGAAAACAATAT	-7.2	10.17	wprA_CDS
1154795	+	18.94	GACAACAAAGGTTATTTTCAAGGTGAAGGACAATAAAAGCCTCTCATCCGT	-5.7	0	wprA_CDS
1154979	+	21.75	TATACGGCAAGCGCCAAAAGGGTCAAAAGCGCTGCTGCGACACTATCCAAG	-12.1	0	wprA_CDS
1155064	+	18.06	AATACAAAAGCTTGGCAAACGATATTCAGTACCCTTATCAATGGCCGCTTA	-8.7	3.96	wprA_CDS
1155212	+	23.44	TGCAGTAGTAGACACAGGCGTAGACAGCACGCTTGCCGATTTAAAAGGAAA	-9.7	0	wprA_CDS
1155257	+	19.44	AGGAAAAGTAAGAACAGATCTCGGACACAATTTTGTCGGACGAAATAACAA	-6.3	0	wprA_CDS
1155301	+	13.63	ATAACAATGCAATGGATGATCAGGGGCATGGGACGCATGTCGCAGGCATTA	-10.1	0	wprA_CDS
1155331	+	11.44	GGACGCATGTCGCAGGCATTATTGCAGCCCAAAGCGATAACGGCTATTCAA	-11.7	0	wprA_CDS
1155593	+	30.25	CAGCGGGAATGATGGAGAAAATGCCTTATCTTATCCTGCATCTTCTAAATA	-11.3	0	wprA_CDS
1155622	+	10.44	CTTATCCTGCATCTTCTAAATATGTGATGTCAGTCGGCGCAACGAATCGCA	-8.4	1.82	wprA_CDS
1155650	+	17.94	GTCAGTCGGCGCAACGAATCGCATGGATATGACCGCTGATTTCTCTAACTA	-10.9	3.02	wprA_CDS
1155746	+	17.75	CTTAGTGCCGAACGGAAATGTCACGTACATGAGCGGAACGTCTATGGCGAC	-10.7	0	wprA_CDS
1155801	+	57.69	TATGCTGCCGCCGCTGCGGGACTGCTGTTTGCTCAAAATCCTAAGCTAAAA	-8.5	0	wprA_CDS
1156060	+	10.81	TGGAAAGCACTCAAACAGCTGTCAGAGGAAGCGCGAAGGAAGGCACCCTTA	-9.2	3.89	wprA_CDS
1156109	+	17.06	TATCGAGGTGATGAACGGCAAAAAGAAACTCGGCAGCGCCAAAGCCGGAAA	-6.8	7.85	wprA_CDS
1156242	+	21.25	ACATCGTATAAAGTTGTTGTCGTCAAAGGAAAACCTTCCGGCACACCGAAA	-8.4	0	wprA_CDS
1156308	+	11.88	ACGAAGGATACGGCAGTAAAAGGGAAGGCAAACAGCAAAGCGATGATCAGA	-1.4	9.3	wprA_CDS
1156468	+	12.63	CTGTGGATACAGATAAAAAAGAAAGCAAGGAAGCAAAAGTTGTTGTTGAAA	-5.7	50.51	wprA_CDS
1156507	+	1845.81	TTGTTGTTGAAAAGTAACCAAAAAGCGGTGCTCGATGCACCGCTTTTTTAT	-20.7	98.89	wprA+34
1160783	+	17.63	TGTCTGATATCTAAAAAACACCCGGCCTTGATTGAGCCGGGTGTTACGCCA	-19.2	0	yisP+37
1164185	+	58.69	CATTCTACATCACCGCTCAACACATGAGCCCGCTAATGAGCGGGTTTTTTC	-14	56.1	degA+24
1165430	-	16	ATTTATATGAGAAAAGAGAAAGCAAGGGCTAAAATGCCCTTGCTTTTTTTG	-23.5	87.5	yisT+19
1165467	+	41.13	TTGAGGCTTTCCGCAAAAAAAGCAAGGGCATTTTAGCCCTTGCTTTCTCTT	-20.3	73.08	yisS+69
1167993	-	44.31	TTCAGCAATTCATAAAAGAAACGGCTGACAGGCAGGTTTTTGTGAAATGTC	-12.2	32.38	yisX+206
1174845	-	76.88	TCAATCGCTACAAGTGGGATGGCTCAGCCTATTAAGCTGGGCCATTTCTTT	-20.8	56.67	yitF+16
1177321	-	15.81	CGGTTAACCCTCTTTTTTCCCGAACAGGTATCTTCTGTTCGGTTTTTTGCT	-13.2	0	yitH+44
1178715	-	329.44	TTGCATTAATTTCCAAAAGACTGCCTGATCGAATCGGGCAGTCTTTTTCAA	-21.5	38.71	yitJ+42
1180638	-	1359.44	AGAAGAGACAAAATCACTGACAAAGTCTTCTTCTTAAGAGGACTTTTTTTA	-10.8	54.19	yitK+271
1180678	-	1344.56	AAGGTGCTAAATCCAGCAAGCTCGAACAGCTTGGAAGATAAGAAGAGACAA	-8	40.22	yitK+231
1182397	-	19.44	ACATAAAAAAACGGCTCGCTCCGCAGTCTGCTGCAGGCGAGCCGTTTTCAT	-26.7	71.43	yitM+51
1182444	+	54.75	AGCATGAAAACGGCTCGCCTGCAGCAGACTGCGGAGCGAGCCGTTTTTTTA	-31.7	81.82	yitL+49
1187656	-	51.75	AAAATGAGCAAACAAAAACAGTCAGACTCTGTGTCCTGACTGTTTTTGTTT	-23.2	100	yitS+44
1190001	-	127.69	GGACAAACTGCAATAAAAAAAGGCTATGGCGACTCGCCATAGCCTCTTATT	-19.3	72.39	yizC+35
1190037	+	98.44	GCAGTTTGAAGTCAAATAAGAGGCTATGGCGAGTCGCCATAGCCTTTTTTT	-24.4	93.94	ipi+32
1192606	+	207.75	TCAATAAAACAAAAAAGGACAGCCTGACATGTGAGGCTGTCCTTTTTTACA	-23.8	71.3	yitW+44
1192914	+	52.56	AAGAAATTGCTTGCATTCGCGCTTTGTACTGGCGCGTATGCGGCCCTGTTT	-18.3	5.85	yitY_CDS
1194185	+	49.13	GCACGGCGGCAGCTATTATCTGCCTTATATGACCTACCAGACAAAAGCGCA	-6.8	1.44	yitY_CDS
1194501	+	16.31	TTTACCCGCTCCTCGGACGGCTGTCTGAAAGGTTTGACAGCCGTTATTTTC	-18.1	0.49	yitZ_CDS
1204124	+	12.75	TTCAATCCGGCTCTTCTGTCACGCTGACAGATGATCCGATTGAAGCTGTAA	-21.1	5.71	argF_CDS
1204399	-	31.19	TTGCCATCAAAAAAACTGCTGAGTTTGGCTCAGCAGTTTTTTGATGATTCC	-26.1	50	yjzD+332
1204688	-	1501.5	AGCATTAAAAAGCCAAAAACCCAAAACATTTATTGTTTTGGGTTTTTTAGT	-19.1	84.04	yjzD+43
1204709	-	17.13	CTATGAACAAAAATGCAAGCCAGCATTAAAAAGCCAAAAACCCAAAACATT	-4.1	15.9	yjzD+22
1207822	+	423.44	AATCTGAAACAGAATAAGAAGAAGCCACTTTTTTGAAAGTGGCTTTTCACA	-16.6	42.65	comZ+34
1208866	+	29.44	ATCATGAATGGACGAGAAGTTTTCAAATTTGCAGTCCGCCAAATGGGAGAA	-8.9	23.49	fabHA_CDS
1208995	+	11.63	CGTATCATGGAAGCTGCTCGCGAGCGTTTAGAGCTTCCTGTCGAAAAGATG	-13.2	0	fabHA_CDS
1209849	+	15.63	ACAAAGCGCTGTCTACTAATCCAGATCCGAAAACAGCGAGCCGCCCGTTTG	-6.5	0.59	fabF_CDS
1210467	+	374.06	AATCATAATCAAGCCAAACCGGCTGCCCTTAAAGGGTAGCCGGTTTTTTTT	-24.9	100	fabF+43
1211622	+	11.13	CAAAGGCGAAACCGTCGCGCTTGTAGGTGAATCGGGCTCCGGAAAAAGCAT	-9.4	0.26	appD_CDS
1213487	+	10.88	CCTTTATAGCTAATGTTGCCCGCACAGCTTTGAGAGGGGGTATGCACACTA	-9	0	appF+38
1213797	+	13.38	ATTGAAAATATGCTGTACAGCTTTTTAACGAAAACGGATGAAAAACTAAAT	-3.3	0	appF+348
1214128	+	17.69	TCTGCCGAAACATATTCTCGGTAATGTTCCGATTGCTGATTTAGAAGAAAA	-7.8	0	appF+679
1215212	+	318.88	AAATAAATTTCCCTTAAAGGGGAGGGAGAGCGTTTTCTCCCTCTTCTGTTT	-20	8.76	appF+1763
1216283	+	10.56	CTCGCCGGAGATCAGGCTGAAAGAAAATATTTCGAAAAAGCCAGAAACAAT	-10.7	4.44	appC_CDS
1217217	+	90.19	AGCAGGTCTCCTTTAGTCAGAAAATATACAAAGAGATCTGCTTTTTATGAT	-14.5	33.96	appC+96
1218076	-	338.38	GAAAAAGACGCTAATCAAAAAACCGCTCTTTGCAAAGAGCGGTTTTTTTCA	-18	97.04	trpS+37
1218113	+	28.63	ATCAAAGGTCAACTGAAAAAAACCGCTCTTTGCAAAGAGCGGTTTTTTGAT	-18.5	42.11	yjbA+35
1219137	-	1663.94	TACCACGGTTCATTCGTCCCTTTTTTACAGGGGAAGAATGAGCCTTTTTTA	-21.9	58.84	yjbE+8998
1219295	-	27.19	ACCTGTTTGAAGAGAGTCTGCGGTGCTGGGAGCAGATAACGGGCAATGTGG	-12.5	0	yjbE+8840
1219980	+	22.06	TCAAACGGTGAAGGGAAAAAGGACAGTAAAGGAAAGACGACACTTAACATT	-0.9	0	oppA_CDS
1220726	+	11.5	ACAGCTTCCGACAGAATCCCTGCCGACCCTGAAAAAAGACGGTTCTTTACA	-6.8	0	oppA_CDS
1220982	+	29.88	AAAGACAATGATGTCAAAACAGCAAAAGAATACCTTGAAAAAGGCCTAAAA	-6.4	0	oppA_CDS
1221550	+	448.94	AATAAAAGACCTCAAGGTATATGGGGAGAAAAGCCCCATATACCTTTCTTA	-21.9	31.52	oppA+64
1225491	+	319.94	TTTTTCATGATTCATCAATCCTTCAAGAGATTTCTCTTGAAGGATTTTTTT	-18.7	98.18	oppF+41
1228140	+	491.81	TAATAGATCGTATCATCAAAAGAAGGCTGAGTCATCAGCCTTCTTTTATTT	-19.6	45.6	spxA+48
1229453	+	19.31	GAAAGAAGAGCAAGCCGTCAATCAGGAAGAGAAGGAGCAAAAGCTTCAATT	-7.3	0	mecA_CDS
1229558	+	13.19	TAACGGAAGCAAAACGACTTTATATTCGTTTGAGAACCGATATTATTTATA	-8.1	0	mecA_CDS
1229758	+	604.56	AACACTTTGCATCATAGCAAACCGATTTCCTTCCGGAAATCGGTTTTTTTT	-18.8	93.82	mecA+34
1233134	+	169.38	AAGCAGTCTTAAAAAAGTAAGCCTGTGCGGAAATGACGCACAGGCTTTTTT	-20.8	67.11	pepF+39
1233545	+	12124.2	GTTGTCGTTAAGACATATGAAACCGCGCTTATCCCGGCGCGGTTTCTTTAG	-22.9	98.35	pepF+450
1233580	-	490.13	AATCATGTGAAAAATAGCCGCAGGCGTGCATATGCTTGAGGCTGTTTTTTT	-21.9	69.79	yjbH+34
1234208	-	11.38	GGCATGTCATGTGACGGCAATGTCTGGTTCGAACAGGATCAGCCGCTTTCA	-13	0	yjbH_CDS
1234353	-	13.69	AGAGCCCGTCATCAAAAAGCTGAAAATCAGATACGGACGTTTTTTCACCTT	-5.2	13.8	yjbH_CDS
1234437	-	23.5	CTTCGCCCATTGCCACGGTCATCCAAAAAAACCGCTTGAAATTTATATGTT	-2.6	0	yjbH_CDS
1234440	-	23.75	ATACTTCGCCCATTGCCACGGTCATCCAAAAAAACCGCTTGAAATTTATAT	-2.6	0	yjbH_CDS
1235132	-	1324.25	CTTCAGTTTATTACGCGTAACCAGAGGTGCTCTTTCCCTCTGGTTTTTTTG	-13	45.6	yjbJ+31
1235153	-	62	AAAACTATGTAAAAAAAATAACTTCAGTTTATTACGCGTAACCAGAGGTGC	-3.2	40.64	yjbJ+10
1235209	-	30.38	CGCCGGACCGGGGAATGTTGACCGATACGGAGGCATTCCTCCTTTCCAAGA	-20.2	22.03	yjbJ_CDS
1235526	-	10.81	TCAAACAAACATGAAGCAAATCAGATCCGTTCGGGAGACTTCTCTATTGAC	-4.3	0	yjbJ_CDS
1235937	-	10.5	GCAATTCAGCATTCCTCAGCGCGAAACCAAAAATAAAATTCTGCGTTTTTA	-5.6	0	yjbK_CDS
1235978	-	11.38	GATTGGCATGAGGGCAGACAAGCCTTCGAAAAGCTGCTTCAGCAATTCAGC	-13.8	0	yjbK_CDS
1239390	+	95.5	ACATGAGCAAACTGATAAAAGGAGAGAATCATTGATTCTCTCCTTTTTTAT	-19.2	100	yjbO+16
1242366	+	457.5	ACCCTCATAACTTGAACAGGTTCAGACCTGCGTAGGGAAGTGGAGCGGTAT	-14	57.29	yjbQ+166
1242427	+	253.81	TTACTATGCCAATTCCAAACCACTTTTCCTTGCGGGAAAGTGGTTTTTTTA	-17.5	63.44	yjbQ+227
1247681	+	39.13	CAGCTTAAATACAAGCCGATGAGATCACCAGCTGATGGTGATCTCTTTTGC	-20.7	45.45	yjbV+29
1248330	+	14.19	AAAGCTTCTCTTGATGCAAGTGTGAAATATTTAGCTGCTGACTTAGGAAAA	-4.7	0	fabI_CDS
1248609	+	650.25	CGCTAAGCAGGATCTATATCAAGCAATCCCGAATAGGGATTGCTTTTTTAT	-16.2	92.47	fabI+45
1253683	-	144.81	AGACAGCCCTTGCATCATTAACAGCCCGGCAGATTACTGCCGGGTTTTTAC	-19.3	73.44	yjcD+30
1256358	-	101.44	TTTTTACTGCATATAAAAAAACCGTTCTCTGGTATGAACGGTTTTTTATAC	-15.6	43.96	yjcF+78
1256403	-	730.63	CAAATGATGAAGGACTGAACGCATCCGGATCTTTTGAGATCCGGATTTTTA	-15.2	72.57	yjcF+33
1258429	+	21.75	AAGGTGCTAAATCCAGCAAGCGTTTTTTATGCTTGGAAGATAAGAAGAAGC	-9.5	44.87	yjzE+2066
1258466	+	1008.75	AGATAAGAAGAAGCGTTAAACCCCTTCTTCTTATGAAGAAGGGGTTTTTAT	-21.2	35.56	yjzE+2103
1260776	-	39.19	TGATGACGAACAATAATAAAAGAAGCCGGACTATCCCCGGCTTCTTTTTTA	-18.1	53.85	yjcK+35
1260812	+	220	CAGTTTCGGTTCGTTAAAAAAGAAGCCGGGGATAGTCCGGCTTCTTTTATT	-22.2	33.33	yjcJ+34
1262392	-	14.63	GAGTCGCCCGTGTATGACACTGTGTGGTCTTATGTGGTACCGCTGGCGATA	-18	0	yjcL_CDS
1262862	+	2422.94	GCGCTACCTTGACAGGGTAGAGGTCGCTGGTTCGAGCCCAGTCGGAATCAT	-15.2	12.08	yjcJ+2084
1262896	+	3109.56	AGCCCAGTCGGAATCATAGCTTAAACCCTTGCGCAGCAAGGGTTTTTTACT	-15.5	82.14	yjcJ+2118
1262955	+	19.5	ATAAAGCCGGTTCGTCAAATTCGTGAGTTGTTGGCGAACTGTTGGCGAAAT	-15.3	0	yjcJ+2177
1263607	-	680.38	AGCTGTTGGGAAAGCAATCCCCTGATCTAGAGTGGTTCAGGGGATTTTTGT	-21.1	77.7	yjcM+95
1263652	+	79.5	AAATTACAAAAATCCCCTGAACCACTCTAGATCAGGGGATTGCTTTCCCAA	-15.2	12.03	yjcJ+2874
1263750	+	11.06	TATTAATTGCGAATACTAGAAACATACCGTTTTCCGCCTTCCTTAGAAGTA	-6.1	0	yjcJ+2972
1265247	+	16.56	ATATCCCTACCAAAGCTACTTTGCAGTTCTCCAGAAAAGAGAAGGAGACAA	-7.7	0	yjcN_CDS
1265268	+	18.19	TGCAGTTCTCCAGAAAAGAGAAGGAGACAATGAATCTGGGAATCTTTATTA	-7.4	0	yjcN_CDS
1265447	+	11.19	ATAAGTCCAAGACGGAAAGCCTGCGGACACTGATCGTTTTACAGAGAAATT	-6	3.38	yjcN+70
1265474	+	744.5	CACTGATCGTTTTACAGAGAAATTTGTGCTTCGATCGGTGTCCGTTTTTTT	-17.4	44.89	yjcN+97
1266460	+	80.75	GTAAAACCTCCCAGTGGTAAGCGAGGATCAACTCAACTGGGAGGTCTTACA	-22.8	5.61	yjcO+112
1267441	+	242.19	AGATTAAAGATTGGATTAAATAATAAGAGCATCCTGCGGGGTGCTTTTTTT	-13.8	100	yjcQ+28
1269648	-	15.5	GCATGAATAAAATAAGGTCCCCCTCTAAAAAGAGAAGGGACCTTATTTTCG	-21.8	75	yjdB+85
1269692	+	47.56	TTGAAGCGAAAATAAGGTCCCTTCTCTTTTTAGAGGGGGACCTTATTTTAT	-25.3	89.47	yjdA+108
1276290	-	91.94	GTAGAGTCCTTAATTACAAAAGCAGGCACTGCGCCTGCTTTTGTTTGGATT	-22.6	44.19	yjdG+47
1276329	+	183.81	CAGAGGTAAATAATCCAAACAAAAGCAGGCGCAGTGCCTGCTTTTGTAATT	-20.8	58.4	yjdF+38
1278179	-	16.25	TGAAAGGGATGCGGAAAAAGCTTAATCGATATGACTAAGCTTTTTCGTTCC	-16.1	30.56	yjzH+26
1278226	+	65	AGGGGAACGAAAAAGCTTAGTCATATCGATTAAGCTTTTTCCGCATCCCTT	-24.2	0	yjdI+61
1279513	+	15.56	GCTGTTTTTCCAAACAAAAAAGAGTCACATTAATGTGTGGCTCTTTTTGCA	-19.3	31.03	yjdI+1348
1282533	-	158.56	AGGCTCTTATTAAATAGAAAAAAGGCTGTCCGTACGGACAGCCTTTTCTAA	-21.6	92	yjfA+38
1282569	+	24.13	AGAAGCGAAATAAATTAGAAAAGGCTGTCCGTACGGACAGCCTTTTTTCTA	-21.4	75	yjeA+38
1283120	-	1838.25	AACCTCATACCAGAGGCGGCCAAGAACTCCATCCTCCCGGCCGCCTTTATT	-18.4	46.9	yjfB+49
1284359	-	13.25	CTGCTGGTTTTGGGAATCAAAAAGCGCCGCTGTATGTGACGCTTTTTTCAT	-13.1	16.13	yjgA+12
1290271	-	10	AAAATCCGCCCGGCAGCGACCACAGCTCATCATGCTTCTCCCGGACAAGCA	-7	66.67	yjiA+404
1290641	-	20.94	AACACATTACATTATAAAAAAGAAAGAGCCCACAGGCTCTTTCTTTTTTAG	-21.1	22.22	yjiA+34
1293738	-	167.38	AAAAAATATTTAAACAGAAAACCGAAATCAAATTGATTTCGGTTTTTATGT	-16.7	72.63	yjzI+38
1293776	+	25.31	CCCGCAGTAAAAACATAAAAACCGAAATCAATTTGATTTCGGTTTTCTGTT	-15.9	27.27	yjiC+41
1294954	-	111.81	AATGAATGACAGACAAAAGCCGCTTTCCGAGGGAAAAGCGGCTTTTTGTAC	-20.5	64.2	yjkA+42
1294995	+	214.88	GAATAACAAGTACAAAAAGCCGCTTTTCCCTCGGAAAGCGGCTTTTGTCTG	-22.2	44.62	hemD+45
1296310	-	10.88	TTTAGGCCCTTCCGGCTCAGGCAAAAGCACCCTCCTTTCTATGTGTAATTT	-5.8	1.49	yjkB_CDS
1296579	-	262.06	GACTGCGTAGCATCTGCAGGAGAATGGGTGAAAGCCTGTTCTCCTTTATTT	-19.3	35.17	yjlA+41
1299030	+	20.44	CCGTTTTGCTAACAGCTACCTTGAAGTCATGAACGAACGCGAAAACCAAAA	-3.4	0	rex_CDS
1299225	+	12.38	GGTAAACAAATACCCAACTCACCAAATCATTACGGAATTACACCGCCTTGC	-4.4	0	ndh_CDS
1299234	+	14.19	ATACCCAACTCACCAAATCATTACGGAATTACACCGCCTTGCTGCAGGCAA	-5.2	0	ndh_CDS
1299273	+	23.88	TGCTGCAGGCAACGTGTCTGAAAAAGCGGTTGCAATGCCATTAGAAAAACT	-10.2	0	ndh_CDS
1299650	+	14.5	TCATGCCGAACCTTGCGAAAAAATACGGCGTAGACCATAAAGAAATCAAAT	-6.6	0	ndh_CDS
1299909	+	15.88	ATTAGTCGGTGAATCAGGCCTAGAAGTGAACCGCGGACGCGCGACTGTAAA	-9.8	0.92	ndh_CDS
1300318	+	2484.81	TGGCATTGCCAAAAGCATTCCTTTCCGAGTGCTTTCTGGCAATGTCTTTTT	-26.8	99.73	ndh+66
1309830	+	64.06	TCAGTCAGACGATTGACGACGTGATGTCCCGTTTTTCAGCGGGCATTCTTT	-15.5	47.25	exuR+27
1312140	-	10.38	CCCTGTGCAATGAGATAATCTGAAAAACGTCCAAGCAGCGGGTTTGCGGTT	-8.4	36.36	yjnA+711
1312814	-	18.88	TAAAATTGATTTAATGAAGAAGGCTATCCGCTTGAAGGATAGCCTTTTCTT	-18.3	61.54	yjnA+37
1313796	-	44.88	CATGTAGCGTAAACAAGAAAAAAGATACCTGTTAAGAGGTATCTTTTTTTT	-17.4	93.75	yjoA+44
1316101	+	20.19	GCACCGTGTCATGCTGGATTACATTAAGCCTTTTGGAGAGGACACGTCGCA	-11.8	7.84	rapA_CDS
1317134	-	72	GATAAAAGAATGGAAGCTGAAGAAATAAAAAGCCCTAAGGGTCTTTTTTTA	-6.5	75	yjpA+23
1317153	+	52.75	CATATTGCGGCACGCAATCAAACATGATGCATAAAAAAAGACCCTTAGGGC	-6.8	85.71	phrA+24
1318489	-	116.63	GTTTGTATGTAAGGCGAAAAGACGGAAGCTTCACAGCTTCCGTCTTTTCAT	-24.6	64.58	yjqA+39
1320385	-	13.69	ATATACCTGAATTCACCCCGGCCGTCAAAGGCTTCCCCATGTGCCCATCTT	-5.8	4.31	xkdA+185
1320568	+	39.5	AAATGTTAGGTTCTCTTCTGGGCTGAGGAATATATCCTCAGCCCGTATTTG	-21.1	24.49	yjqC+42
1320828	-	25.19	CTTCAGGAATTCCAGGCAAATCAATTTATGTACCACTTCTGTGTGCCAACC	-6.6	7.69	xkdA_CDS
1321206	-	56.69	AAGGGAAAGATTTCTACACTACCTTCCAGTCCTATACGGGCTTTTCTTTCT	-8.8	2.82	xre+123
1321400	-	54.06	CGGACCTGCAGCTTGCATACCGCGATATGCAGGATTTTTCCCCAGAAAGCA	-15.3	7.19	xre_CDS
1334299	+	11.75	CAAAGCTGAATCAGCCCATACGCAGACCTTTCTCAGAAAGGTCTGTTTTTT	-18.8	13.56	xkdM+52
1334780	-	11.81	GCATTGCATAGTACAAATACACAGCTTCCTTATCGCCATCCTTTACTAGTT	-0.6	25	spoIISB+13662
1339139	+	12.44	CTTACATTTATTGACGAGCAGGGAGCGAAAGAAATTTCGTTCTCTTCTTTT	-15.7	3.85	xkdP_CDS
1347740	-	17.19	TGTCGCCCTGTTTCACGACGTAAGTTTGGCTGCCGCCTCCCCCAATTCCTG	-7	9.81	spoIISB+702
1348191	-	37.38	AAAAGTTGAAGAAGAAAAAATAAATCCCGGAGCGGCTCCGGGATTTTTATG	-16.7	0	spoIISB+251
1348225	+	21.94	TAAGCTGATCAAAGACCATAAAAATCCCGGAGCCGCTCCGGGATTTATTTT	-17.2	50	xlyA+43
1348397	-	148.06	GCATGATCACACTAAAAGGACAAGGGAAAACAGCTCTTGTCCTTATTCCTT	-15.4	7.95	spoIISB+45
1349433	-	595.88	AAATATGATATTTTAATGTCACACCGCTTCTGTCAAAGGAGCGGTTTTTTT	-18.5	69.38	pit+35
1349479	-	37.06	CGCTTCCGATTTCAGCGACACTTGGTGCCATCGCCTACTTTATTTTAAATA	-6	8.64	pit_CDS
1349621	-	10.56	ATTTTCGGCGCCACGTTTATTCATTTGCCGGTCAGTACAACCCACGTCATT	-5.4	8.33	pit_CDS
1349840	-	32.31	GCGCAAAAAGCAATGGGAATTATCACAATGGCTCTCATCACAGCGAATTTA	-6.9	18.15	pit_CDS
1349872	-	12.81	CCCTGCAATCGTATACACACGGAACAAACGATGCGCAAAAAGCAATGGGAA	-8.3	10.51	pit_CDS
1350036	-	11.38	AAACTATAAGGGCTTCATTAAAATCATTGAAGCACTGATTCTATCACCAAT	-7.8	16.69	pit_CDS
1350234	-	16.19	TGTTGCCAAAACCATTACGAAAGACATCGTAGATCCTTATACGCTGGAAAA	-7.2	11.33	pit_CDS
1351339	-	38.06	CGAAAAGCAAGCTGATAAAACGGTTCCCTTGTTTAGGGAACCGTTTTTTGG	-20.4	68.75	ykbA+36
1354073	+	18.38	TCCAATAAATTGTGATTCTTTTGCCTTCCGGCGCCGCCGGAGGGCTTTTTT	-20	100	mhqA+43
1357418	-	41.75	GTGCTCAGAGCATAAAAACCCCCTGTCCATTACGGACAGGGGGTTTGAGGT	-29	18.6	htrA+518
1357894	-	81.44	ACTTCGTAAGACATAATGCCTCAGGCCGTAAAAGCGGTCTGAGGCTTTTTA	-23.7	56.52	htrA+42
1360296	+	60.81	ACAGAACAGGTTGGTAAACAAACATGAATCCTTGAAAGAGGATTCTTTTTT	-10.8	89.19	proG+24
1369836	-	514.06	ATCAAGTATAAACAAATGGAGTGGCTCTAGTAAAAAGGAGCCACTCTTTTT	-19.2	96.45	ykgB+40
1372592	+	77.06	AAGCCTTGGTGAACGTTAAACCCAAAACATAAGTTGTTTTGGGTTTTTTTG	-15.5	75	ykhA+39
1376436	+	61.81	CATACGCGTAAATAGAAGCGCGTATGCACACGGAGGGAAAAAAGCCCGGGA	-16.4	21.83	ykkB+141
1376475	+	202.44	AAAAGCCCGGGAGAGTCAATCTCATGTGAGACGACTGTCCGGGGTTTTTTT	-26.3	56.1	ykkB+180
1378179	+	788.88	CAATCGTCTTTAACTAGACTGCAAGAGGCCCGCGCAATGCGGGCTATTTTT	-17.8	29.16	purU+34
1378411	+	59.38	ATAACCTGGCGTTACAGGAGAGCGGAGCGTGCACAAGCGCGTTCAATCAAG	-20.1	28.79	purU+266
1378441	+	454.25	GCACAAGCGCGTTCAATCAAGGTGGTACCACGGAAACCCATTTCGTCCTTA	-5.6	51.59	purU+296
1378468	+	2906.81	CCACGGAAACCCATTTCGTCCTTATGAATCAGGATGAAATGGGTTTTTTTA	-25.1	96.56	purU+323
1381404	-	31.13	ACACTTCATCAAAAAAATTGAGGATGCCTTGTACAGGCATCCTCTTTTTAT	-18.8	88.89	ohrR+30
1381441	+	242.25	AGTTGCTGAATAAATAAAAAGAGGATGCCTGTACAAGGCATCCTCAATTTT	-19.7	85.44	ohrA+38
1383279	-	170	GCTAGTATAATTTGAAAAAACCATCTGCATTTGGCAGATGGTTTTTTTCTA	-20.2	79.37	metE+41
1385680	-	5503.56	GTGTTTTACGTAGAAAAGCCTCTTTCTCTCATGGGAAAGAGGCTTTTTGTT	-23.9	62.43	ispA+344
1385730	-	602.38	AAGGCACGGTGCTAATTCCATCAGATTGTGTCTGAGAGATGAGAGAGGCAG	-9.9	80.94	ispA+294
1388073	+	70.38	TAAACTATCATCAATAAAAAAATCCGCTATCTGTGATAGCGGATTTTTTAT	-19.1	65	rsbRB+34
1391673	-	1150	TGCGCTTAATCGATCTATGACTGCATATTCCCTTAGGATATGCAGTTTTTT	-14.8	96.16	tnrA+5738
1391707	-	18.81	GAAGTGCAGGTTGACCGAATGGTGTATTTTTTTGTGCGCTTAATCGATCTA	-11.8	12.46	tnrA+5704
1391741	-	68.69	CCTTATGACCCGATCTGGATAATACCAGCGTGGGGAAGTGCAGGTTGACCG	-15.4	20.06	tnrA+5670
1395320	+	38.38	ACAGGAGATAGATGACTAATCAAAACCCCCGCTGCAGCGGGGGTTTTTCAT	-20.9	37.84	ykoJ+32
1395790	+	49.38	CCTATGCCATACAGTGCTAAAGCTCTACGATTGAAGGCGCCCGCACGCTTT	-8.1	4.26	ykzD+282
1395978	+	125.38	AGACAATTGATTACACGATGAGGAGACGAACTGCCGCACCTTCTGGCGAGG	-5.1	0.41	ykzD+470
1396001	+	38.56	AGACGAACTGCCGCACCTTCTGGCGAGGCCGGCACGTCTCCGTAGAGGAGG	-17.4	10.13	ykzD+493
1397409	+	289.75	CTCATTATAAACGTAAAAAGTCCGTCTCAACTGCGAGCCGGACTTTTATTA	-15.7	68.42	mgtE+41
1398997	+	79.31	TGCTGTTTCGTTAACTATTCTACACTCTCTATTTCAGGAGAGTGTTTTTTT	-12.7	100	ykoM+37
1404494	-	23.63	TTGCATCAGTTGAAGAAAAAGAGCTGACTAATGAAGTCAGCTCTTTCCGTG	-17.7	40	ligD+24
1407311	-	142.69	GAACAATTCATTATTGAACAGCCGTCGCAATAACAGCGCCGGCTTTTTTTC	-14.8	27.69	dgcW+18
1410724	+	37.56	CGTCATTTCATGGATTGTATCCATCGGCTTTGTTGGCATGCCTGAATTCAT	-9.4	13.07	ykoY_CDS
1410746	+	32.88	ATCGGCTTTGTTGGCATGCCTGAATTCATGTCTAGCAAGACCTTTGCCTTA	-13.2	4.15	ykoY_CDS
1410768	+	1234.63	AATTCATGTCTAGCAAGACCTTTGCCTTATGTCGGCAAAGGTCTTTTTTGC	-19.2	31.74	ykoY_CDS
1411665	+	185.13	GTGAACGGGCGTAATCTGAAAGACTCTGCTTAAAAGCAGAGTCTTTTTGTG	-20.8	79.35	ykoY+37
1412832	+	15.94	ATGGGCAGAAGGGCCAGCTTTTTTGATTTTTTTAAACTGCGCCCTTTCAAA	-13.7	28.29	rsgI_CDS
1414089	-	325.38	GCAGACATTCTATAGTCTGCGCCACCCCGGCTCAGAGGCCGGGGTTTTATT	-27.9	89.83	ykrK+36
1415937	+	202.5	TAAATAATACAAACACATTGTTCCTCTGAGAGAATTCTCAGAGGTTTTTTA	-16	73.27	ykrL+44
1416965	+	21.88	GCTGGCAACAATCGATATCAGCCAATTATCAGATTCCACACTCTTTTTTAT	-4.1	1.37	ktrD_CDS
1417449	+	222.31	AGAGTGATTATCGGATAGGCAAAACACCGCATATTTTGCGGTGTTTTTTGA	-16	69.63	ktrD+33
1417893	-	31.88	AAATAGAAAAAGCACCTCTTAAGCGGGACGCCGCCTAAGAGGTCTTTTTTA	-24.9	92.31	ykrP+45
1417939	+	13	ACAATAAAAAAGACCTCTTAGGCGGCGTCCCGCTTAAGAGGTGCTTTTTCT	-25.7	11.76	ykzE+44
1422123	-	69.38	AAAAAACCGCTGGACTTTGCTCATTTGGAGCCGAGTCAGCGGTTTTTTTGT	-26.6	59.52	mtnA+49
1422176	+	45.63	AAAAAACCGCTGACTCGGCTCCAAATGAGCAAAGTCCAGCGGTTTTTTAAT	-26.8	79.31	ogt+253
1424475	-	1478.56	GGCGGACATAGATGTTAAGCCTCCTTCTCTCTGAGAAGGAGGCTTTTTTAC	-23.6	89.53	mtnU+292
1424521	-	899.63	AGGCACGGTGCTAATTCCATTCAGATCTGATCTGAGAGATAAGAGAGGCGG	-9	85.25	mtnU+246
1425043	+	28.06	GCAATAAGCAGGCTTTTCCAATGATCAAGGCGGGGAAGAGGCCATTCCGCA	-11.6	30.51	ogt+3120
1426983	+	503.63	AAGCACGGTGCTAATTCTTGCAGCTAGCGGCTGAGAGATAAGATTCGGACG	-11.5	17.54	ykrV+146
1427007	+	33.75	TAGCGGCTGAGAGATAAGATTCGGACGAGAAACGAAACCTCTTTAGACGCG	-11.2	0	ykrV+170
1427032	+	4031.75	CGAGAAACGAAACCTCTTTAGACGCGATTGCAGTTTGAAGAGGTTTTTTGA	-20.5	33.51	ykrV+195
1427287	+	12.75	AACTGCTGCATCAGAAAAACAAGCGGTCATCACAATTGCCTATCCTGAAAT	-6	0	mtnW_CDS
1427467	+	18	TGGCGTATACGGCATCCGGAAGCTGCTGGGAGAGTTTGAGAGACCGCTGTT	-9.3	0.04	mtnW_CDS
1427857	+	10.5	TGAAATCCCAGTTCCGATTATGGCGCATCCAGCAGTGAGCGGAGCGTTTAC	-13.9	0	mtnW_CDS
1427928	+	11	TTTCTCACGCTCTTTTACTCGGAAAATTAAACCGATATTGCGGTGCTGACT	-7.4	6.05	mtnW_CDS
1428287	+	14.69	AAGCTTGCGCTAGATAAATGGGGAAAGGCTGAAGCCGTATGACGACTCGAA	-7	7.24	mtnX_CDS
1428466	+	15.38	ATCAAGGAAGGTGTCGGGCGGATGTTCGGCCTTCTGCCCAGCAGTTTAAAA	-16.7	12.31	mtnX_CDS
1428539	+	156.44	TGGAAGATGCAAAAATCAGGGAAGGCTTTCGGGAATTTGTAGCATTTATCA	-7.7	0.77	mtnX_CDS
1428560	+	11.13	AAGGCTTTCGGGAATTTGTAGCATTTATCAATGAGCACGAGATTCCGTTTT	-9.3	0	mtnX_CDS
1428658	+	14.94	GGCATTGTGGAGAAAGACCGCATTTATTGCAACCATGCTTCATTTGACAAT	-7.7	0	mtnX_CDS
1428848	+	15.44	TGGAGGCAGCAAAGCTGTCTGACCTATGCTTTGCAAGGGATTATTTATTAA	-13.7	0	mtnX_CDS
1429167	+	41.31	CTGCTGGTCGATCAAAACGGAGAGCCTGCTGAAAGCGGGCATTCTCTGAAA	-18	0	mtnB_CDS
1429191	+	29.63	CCTGCTGAAAGCGGGCATTCTCTGAAACCGTCAGCAGAAACGCTTTTGCAT	-15.7	1.42	mtnB_CDS
1429231	+	15.13	CGCTTTTGCATACACATTTGTACAATAAAACCAATGCCGGATGCTGCCTGC	-6	0	mtnB_CDS
1429245	+	12	CATTTGTACAATAAAACCAATGCCGGATGCTGCCTGCATGTCCATACGGTA	-7	0	mtnB_CDS
1429248	+	11.75	TTGTACAATAAAACCAATGCCGGATGCTGCCTGCATGTCCATACGGTAAAC	-7.3	0	mtnB_CDS
1429491	+	12.5	ATCCGAAATCATGGTATTACGGCTTGGGGGAAAACAGCATTTGAGGCAAAA	-6.2	0.61	mtnB_CDS
1429515	+	13.38	TGGGGGAAAACAGCATTTGAGGCAAAAAGAGTGCTTGAAGCGTATGAATTT	-7.2	0	mtnB_CDS
1429771	+	10.56	ATATGACCTGACAGAAGAAGAAAAACAGCAAATTCTTGATACCTTCGAAAC	-2.7	0	mtnD_CDS
1429781	-	20.13	GACAATGAAATAACATCCTGTGCTTTATAGCCGCGGCGGGTTGAGATATCT	-9.4	22.37	ykvA+380
1430123	-	77	GCGTTTGCAATAAATATAAAAAGCCCCGTTCGATGAACGGGGCTATCTCAC	-19.4	2.5	ykvA+38
1430158	+	3356.38	CGTGAATCAATAAGCGTGAGATAGCCCCGTTCATCGAACGGGGCTTTTTAT	-20.4	92.78	mtnD+38
1430957	+	10.81	GAGATGTTATGCCAGCATATGATGCAAATAAATAGCGGCCTATCAGATGCA	-6.8	21.42	spo0E+16
1430997	+	218.31	TATCAGATGCATATATAAAGAGAGAGCTTTTCGGAAGCGCTCTTTTTTTCT	-12.2	22.17	spo0E+56
1431457	-	527.06	CCTCCCCGTATCCGCATCATAGCCCCCCTGACCATGTCAGGAGGGTTTTTT	-16.1	79.91	kinD+29
1431491	+	68.69	GCCCGATCACGAAGATAAAAAACCCTCCTGACATGGTCAGGGGGGCTATGA	-18	11.46	eag+33
1431910	-	16.5	TCTCGGCAAGCCGACAGCTGAAAAATGGGAGCTGAACTCACTTCAGGACAT	-10	0	kinD_CDS
1433633	-	662.44	AAAAATAGCAAAAAAGGAAGCCTTGTGACATATCAGGCTTCCTTTTTTTAC	-19	76.3	motB+43
1433677	+	155.69	TAATAAGTAAAAAAAGGAAGCCTGATATGTCACAAGGCTTCCTTTTTTGCT	-21.7	18.06	mhqR+41
1433683	-	31.19	CCGGCGGGTTGAAGTTCTCATTTTGCCGAGAGGCGCAGCGGAAACAAATGA	-11.1	32.43	motB_CDS
1433846	-	14.63	CTGAATTCCAATCAAACTGGCATTTAAGCGTCATGAGAGCGGTAAACTTTA	-6.1	0	motB_CDS
1433902	-	35.06	CCCGCCAAGAAATATCATTATCAGCGGACATACTGATAATATGCCAATTAA	-6.9	6.67	motB_CDS
1434052	-	12.31	AAAGCTGGAACATCAGCTGGAGACGAAGATGACTAGTGAAGGCCTTCTGAT	-7.9	0	motB_CDS
1434137	-	23.06	AAAACAAGAAAGAAAAAGAAAAAGCAGCTGATCAAGAAGAACTTGAAAATG	-3.2	0	motB_CDS
1434173	-	18.88	TCGATGAAGTGAAAAAGGAAAAAGAAGAGAAAGAGAAAAACAAGAAAGAAA	0	1.12	motB_CDS
1434364	-	24.63	ATCATGGCTCGTTCCTTACGCCGACATCCTTACTCTTCTCCTGGCATTGTT	-4.9	1.01	motB_CDS
1434419	-	26.5	GGCGCAAAATGGCGAGAAAAAAGAAGAAGAAGCATGAGGACGAGCACGTTG	-4.8	2.25	motB_CDS
1434665	-	12.13	TGAGCTTGGACACGCCATCAGTGCTGCCTTTGTTGCCACACTTCTCGGTAT	-6.3	5.36	motA_CDS
1434805	-	14.38	GAGGAAGTCGAAGCAATGGAGGACAGGCACCAAGCAGGAGCCGCTATTTTT	-8.9	0	motA_CDS
1434866	-	16.06	AAACGGGCTCAGCATGGCTGTTGACGGGCAAAGCGCGGAATTTATAAGAGA	-10.8	1.32	motA_CDS
1434932	-	21.69	TGCACGCCGCGAAGGTCTGCTTGCTTTAGAAGCAAGCATTGAGGATGTAGA	-15.5	0	motA_CDS
1435076	-	20.75	CGCCGGGACAATCTCAGCAGTCGTTATTGCGTTCCCAACAAAAGAAATTAA	-7.4	0	motA_CDS
1435138	-	15.31	ATGGTTCTGAAAGGCGTCAGTTTCAGCGCCCTTGCAAACCCCGCTGCCATT	-12.2	0	motA_CDS
1435591	-	92.56	TGCGAGCAAAATAACAATCAGCGGTTTCCTTTTAGGAAGCCGCTTTTTTTT	-17.2	91.89	clpE+37
1439345	+	875.06	CCCTCTATAAAAAACTAAGGACGAGCTGTATCCTTGGATACGGCCTTTTTT	-11.1	42.48	ykvI+210
1439385	+	36.31	CGGCCTTTTTTATGTTTTTCTAGAGCACCTTCCGAAAAAAGGTGTTTTTTT	-9.8	1.14	ykvI+250
1442069	+	264.25	ATTGATAGTACAGAAGCAGATTAAGGCGTACAATTTGTACGTCTTTTCTTT	-12.9	98.4	ykvM+281
1442080	-	10.94	ATATTGATAATAATATTTAATGCCTATGATCTCTAGATAGGCATTTTTTCT	-10.5	13.04	ykvN+267
1447031	-	191.31	TTTCATTAGAAAGCGGCGAGTGGAATTCCCCCCGGATTCGCTCGTCTTTTT	-14	48.39	ykvS+631
1447117	+	12.81	CGCTTTCTAATGAAAAGACGGGATGCTGGATGGCAGCTCGTCTGTTTTATT	-16.7	0	ykzR+549
1447555	-	55.25	TACATATGAAATTCGCTTTCTCAAAAGCTGCCGGCCGGCAGCTTTTTTACA	-15.1	83.33	ykvS+107
1448236	+	78.13	CTTAGAACAGCCAAGAAGCTGAAGGTTTCTCATACGTGAGAAGCCTTTTTA	-18.9	20.17	ykzS+29
1448537	+	11.06	ACTTTAAGGAGGAAACTGTATGACAACGAAATTCACTGCTCTGGCTGTTTT	-3.3	4.13	ykvT_CDS
1448671	+	13.13	CGAAATGGCTTACACATATAGATCGAAATACGAATGAATCTTTCCCTTCAC	-2.6	18.82	ykvT_CDS
1449172	+	15.44	TTGCCGTCTAAGCATAGAAGAGACAATTTGTCTCAGCTGTGCTTTTTTTCA	-17.9	63.64	ykvT+40
1451163	+	33.25	TGAAGGAATGGACGGAAGAATAGCTGAGAGCATAGACTCTCAGCTTTTTTC	-17.6	90.91	stoA+28
1453280	-	30.06	AAAGCTTGATACATAAAAAGCCAGCAGCCTGATTAGGCTGCTGGTTTTATT	-24	55.56	ykwB+9533
1453317	+	91	TTAAGACTCCTAAAATAAAACCAGCAGCCTAATCAGGCTGCTGGCTTTTTA	-19.7	19.81	zosA+33
1453368	-	67.94	TATCATAGGCTGTGCAGCGGGTTTCCTTTGCTGCACCCTCGCTCTCATCCT	-17.1	22.56	ykwB+9445
1454829	+	110.06	GTAATAGAAATAAAAAAGGACTTTGTTCTCGACATCGTCCTTTTTTATCTG	-16	2.2	ykvY+47
1457045	+	30.69	CAGGCATGAGTGATTGAGGGAAAAAAACGGGAAGTTCATTCTCGTTCTTTT	-8.6	0.21	glcT+87
1457076	+	231.5	AAGTTCATTCTCGTTCTTTTGCGCACCCAATTTTGCTCATGCCTTTTTGTT	-2.7	0	glcT+118
1457275	+	26.44	GCGTGCGCTTATGCTTCCAGTTGCGATCCTTCCGGCTGCGGGTATTTTGCT	-14.4	0	ptsG_CDS
1457293	+	120.38	AGTTGCGATCCTTCCGGCTGCGGGTATTTTGCTTGCGATCGGGAATGCGAT	-18	8.55	ptsG_CDS
1457335	+	16.88	GAATGCGATGCAAAATAAGGACATGATTCAGGTCCTGCATTTCTTGAGCAA	-9.4	0	ptsG_CDS
1457440	+	45.88	CGATAACCTTCCGCTTCTTTTCGCAGTAGGTGTAGCCATCGGGCTTGCCAA	-11.1	0	ptsG_CDS
1457488	+	28.94	CAATGGTGATGGAGTTGCAGGGATTGCAGCAATTATCGGTTATCTTGTAAT	-13.3	0	ptsG_CDS
1457585	+	53.06	TCGGATTCAGTTGAAAGAGCCAAGTTCTTTACGGAAAACCATCCTGCATAT	-8.4	0	ptsG_CDS
1457644	+	10.69	GCTTGGTATACCTACCTTGGCGACAGGGGTGTTCGGCGGTATTATCGTCGG	-15.5	1.68	ptsG_CDS
1457661	+	21.13	TGGCGACAGGGGTGTTCGGCGGTATTATCGTCGGTGTGTTAGCTGCATTAT	-11.1	11.03	ptsG_CDS
1457701	+	12.69	AGCTGCATTATTGTTTAACAGATTTTACACAATTGAACTGCCGCAATACCT	-6.8	0	ptsG_CDS
1457734	+	25.31	TGAACTGCCGCAATACCTTGGTTTCTTTGCGGGTAAACGTTTCGTTCCAAT	-8.2	3.31	ptsG_CDS
1457910	+	12.69	TCTTCGGGGTGATTGAACGTTCGCTTATCCCATTCGGATTGCACCATATTT	-11	0	ptsG_CDS
1457946	+	46.13	GATTGCACCATATTTTCTATTCACCGTTCTGGTATGAATTCTTCAGCTATA	-2.8	0	ptsG_CDS
1458050	+	19.06	ATTAAAGACGGCGTACAGTTAACGGCAGGTACGTTCATGACAGGTAAATAT	-7.2	0	ptsG_CDS
1458054	+	19.94	AAGACGGCGTACAGTTAACGGCAGGTACGTTCATGACAGGTAAATATCCAT	-7.8	0	ptsG_CDS
1458088	+	12.44	GACAGGTAAATATCCATTTATGATGTTCGGTCTGCCTGCTGCGGCGCTTGC	-9.4	0	ptsG_CDS
1458189	+	10.88	TGGGTTCAGCGGCCTTGACATCTTTCTTAACGGGGATCACAGAGCCATTGG	-11.1	5.82	ptsG_CDS
1458250	+	34.38	CTTATTCGTTGCTCCAGTCCTGTTTGCGATTCACTGTTTGTTTGCGGGACT	-13.9	0.52	ptsG_CDS
1458404	+	11.06	TGGTGGCTTGTCATCCCTGTCGGCTTAGGGTTAGCGGTCATTTACTACTTT	-13.8	0	ptsG_CDS
1458466	+	37.88	TGCCATCCGCAAATTTAATCTGAAAACACCTGGACGCGAGGATGCTGCGGA	-8.1	1.63	ptsG_CDS
1458514	+	28.5	GGAAGAAACAGCAGCACCTGGGAAAACAGGTGAAGCAGGAGATCTTCCTTA	-19.8	0	ptsG_CDS
1458764	+	37.88	ATGCAAGACATTATTGCGGGACGCAAGCCTAGACCTGAGCCGAAAACATCT	-4.2	0	ptsG_CDS
1458799	+	12.88	TGAGCCGAAAACATCTGCTCAAGAGGAAGTAGGCCAGCAGGTTGAGGAAGT	-9.2	0	ptsG_CDS
1458820	+	16	AGAGGAAGTAGGCCAGCAGGTTGAGGAAGTGATTGCAGAACCGCTGCAAAA	-10	0	ptsG_CDS
1458983	+	11.5	CTCCCTTCTGAAGGAATTGTCGTATCACCGGTTCGCGGAAAAATTCTCAAT	-6.8	0.56	ptsG_CDS
1459046	+	31.56	AAACATGCGATCGGCCTGCAATCCGACGGCGGAAGAGAAATTTTAATCCAC	-8.6	0	ptsG_CDS
1459286	+	24.06	AGCGGTTCAGTCAACAGAGAACAAGAAGATATTGTGAAGATTGAAAAATAA	-5.3	25.21	ptsG_CDS
1459332	+	126.13	AATAAGGGTGTTAGTACGCCGTGCTTGTCAGATGACAAGTACGGTTGTATG	-22.6	0	ptsG+46
1459693	+	17.63	GCGAGTAATGCAAGAATTAAAAGGGATTGGTGCTTCAGCCGGCATCGCGAT	-9.1	0	ptsI_CDS
1459724	+	314.88	GCTTCAGCCGGCATCGCGATTGCAAAAGCGTACCGGCTTGAAGAGCCAGAT	-19.2	18.92	ptsI_CDS
1459966	+	10.25	GAAAGAAAAAATCAGCACTGATTCAGTGAACGCTGAATTCGCTTTAAAAGA	-9.7	0	ptsI_CDS
1459989	+	35.31	CAGTGAACGCTGAATTCGCTTTAAAAGAAACGTCTTCTATGTTCGTTACTA	-7.8	0	ptsI_CDS
1460120	+	10.19	CTGCTTGGCGTCGAAATTCCAAACCCAAGCATGATCTCAGAAGAGGTTATT	-16.2	0	ptsI_CDS
1460366	+	24.06	ATCAATGGCGATGTCATTATTGACCCATCTGCGGAAACTGTAAAAGAGTAT	-9	0	ptsI_CDS
1460700	+	20.06	TTGATATCGGCGGAGACAAAGAGCTTCCTTACCTGCAGCTTCCTAAAGAAA	-4.3	0	ptsI_CDS
1460718	+	18.56	AAGAGCTTCCTTACCTGCAGCTTCCTAAAGAAATGAACCCGTTCCTGGGAT	-6.8	28.38	ptsI_CDS
1460738	+	10.81	CTTCCTAAAGAAATGAACCCGTTCCTGGGATATAGAGCGATTCGTCTTTGC	-9.2	2.3	ptsI_CDS
1460792	+	16.63	GAAGAGCAAGAAATCTTCAGAACACAGCTTCGCGCGCTGCTTCGTGCAAGT	-13.6	3.17	ptsI_CDS
1460805	+	12.63	TCTTCAGAACACAGCTTCGCGCGCTGCTTCGTGCAAGTACATACGGAAACT	-9.1	9.45	ptsI_CDS
1460811	+	11.75	GAACACAGCTTCGCGCGCTGCTTCGTGCAAGTACATACGGAAACTTGAAAA	-9.1	0	ptsI_CDS
1461363	+	22.13	TGAGCACGACAGAAGAAGTTGTCGCGTTCGTAAAAGAAACATTCAAGTAAT	-12.2	9.14	ptsI+1
1461405	+	6114.88	TCAAGTAATGTACAAAAACCAGACGGCCTCCGGCCTGTCTGGTTTTTTTCA	-21.2	84.36	ptsI+43
1462793	-	12.06	AAATGTTTTTTATAAAAAAGCGAGCTGTTGATCACAACAGCCCGTTTAAGT	-14.9	0	ykwB+20
1462830	+	134.81	AATTGAATATTTCACTTAAACGGGCTGTTGTGATCAACAGCTCGCTTTTTT	-15.9	73.33	splB+32
1463791	+	20.56	GGATGGGAAAAATACAACTCAAAACGTGACGCAGTCACTTGAACAAAATAT	-5.7	0	mcpC_CDS
1463802	+	23.75	ATACAACTCAAAACGTGACGCAGTCACTTGAACAAAATATTGAATTGCAAT	-5.7	0	mcpC_CDS
1463840	+	23.63	ATTGAATTGCAATTAAAGAGTTATGCCATTTCGTTATCAAGATTGGCTAAT	-6.7	22.23	mcpC_CDS
1463873	+	11.13	TTATCAAGATTGGCTAATGGGGAATTAACGCATACATTTGTAACGAAACCA	-2.2	0	mcpC_CDS
1463974	+	15.06	CAACGATGATTATGTTGCGATGGCTTACATAGGCACCGCAAAAAAAGAAAT	-9.6	0	mcpC_CDS
1464029	+	13.88	ACATATCCAAAAGCGGATTTCGCTGAGGATTACGATCCAACATCAAGACCA	-8.3	13.07	mcpC_CDS
1464582	+	24.5	GTCCGATACAGCAGCTGATCGTAAAAACGAAAGCTGTTTCCGCAGGCGATT	-14.4	1.78	mcpC_CDS
1464610	+	10.94	GAAAGCTGTTTCCGCAGGCGATTTAACAGTGCGCGCGGAATCAAAATCTAA	-12.8	0	mcpC_CDS
1464749	+	15.88	AAAGTATCTGACACCTCTGAACAACTAACGGCTGTGGCTGCCGAAACTAAT	-6.4	0	mcpC_CDS
1464823	+	18.38	AGCGATTGAAGAAGTAGCCGCAGGGGCATCGGAACAGGCTTCTGAAGTTGA	-12.4	0	mcpC_CDS
1464981	+	26.06	AAGGACTTGACGCGCTCGGCCAGCTGCTGATGAAATCAAACGAAGCCAATA	-6.7	0	mcpC_CDS
1465237	+	14.38	AGCCCTTTCTACAAAGCATATCAGCGAGACTGTGAAGCTTATCCAGCTTGA	-6.7	0	mcpC_CDS
1465283	+	30.63	CTTGAGACAAAAGAGGCCTCTCACGCGATGGTTGAGGCAAGCAGAATGAAT	-9.9	3.36	mcpC_CDS
1465615	+	21.38	TATGAACACAATTGCAAAATTCACATTGTAATCCAATTACATCCCCAAACA	-3.5	35.47	mcpC+20
1465637	+	1795.25	ACATTGTAATCCAATTACATCCCCAAACATCATTTGTTTTGGGGATTTTTT	-16.1	91.86	mcpC+42
1465842	+	14.31	TATTCTCAATGACGGCCATCCTGTATTGGTGTACACCCGGACAAAAGAAAA	-5.8	0	ykwC_CDS
1466635	+	154.56	CTTTGGGTGAAATAAAAAAAGATTGCCTGTACGAAACAGGCAATCTTTTTT	-20.8	98.18	ykwC+36
1469903	+	170.19	TAAAAAATAAAAAACAGGGTGCACAACTAAAAGATTGTGTGCCCTTTCTTT	-15.4	67.33	pbpH+41
1471843	-	942.44	ACGTGAAGCAATGCAGACGATAAACAACGGCGTTTAAGCCGTTGTTTTTAT	-16.3	93.51	patA+14
1473165	-	143.5	ATAGAACATGATACAATAAAGACAATCAAATCGCTGGTTGTCTTCTTTTTT	-10.9	20	ykzT+75
1474507	+	127.5	ATCAGCAAGCCTGAGATCAGTGATTTGATTAAAAAAGTGGATACGTATGTT	-5.4	34.96	cheV_CDS
1474517	-	187.25	ACTTTTAAAATAAAAACAGCCGTGCCTCTTTCTGGCAACGGCTGTTTTTAT	-25	88	ykyB+43
1474558	+	255.81	ATTGAATAAATAAAAACAGCCGTTGCCAGAAAGAGGCACGGCTGTTTTTAT	-24.4	76.92	cheV+42
1475100	-	46.94	ATGCAGGTTAAAAATGCGCTTTTTTTCTTAGAAAAAAGCGCATTTTTACAT	-20.3	51.79	ykuC+50
1476172	-	12.69	AGGTGGCAGAAAATTGTGATTGGATCAGAGCAGGCCTGACTGTCGTGCTTT	-9.5	3.18	ykuC_CDS
1482401	+	10.31	TTGGACGAATTTTGGCAGATTCAGAAATCCAAAGTCTCGGGCCCTTCTTTT	-7.8	0	ykuI_CDS
1483294	+	11	TGGATTTATCAGCCGGAATATGCGGAAAAGAACTGGAGCTGGCGCCCTTAT	-8.1	11.16	ykuI_CDS
1483493	+	86.56	ATTTATATGAGCAGGACGGACTGATTTAACGGCTGAAAGGCCGTTTTTTTT	-12.9	87.5	ykuI+22
1483643	+	758.06	ATCAGATCAAGATCCGAAAAAACTTGGCGCTACCCCCGCCAAGTTTTTTAT	-16.2	51.67	ykuI+172
1484279	+	11.56	GTGTTAAATATTTCGAAAAAAATCAAACGTTTGAACTGACGGTTTTCCAAA	-3	11.2	ykuJ_CDS
1484336	+	62.56	AAAAACCTAACACATATCCGTTTGATAATATCGACATGGTTTCCATCGAAA	-5.3	1.58	ykuJ_CDS
1484676	+	29.25	TTACCGCATTGCATTTGCATCGTACAGGCAAGGGAGCTTGGGGCTGCTTGA	-10.8	0	ykuK_CDS
1484835	+	542.5	ATATTACCGATCTGCTCCTGCCCTTTACCGGTGAGGGGGCGGATCTTACCT	-20.3	20.31	ykuK_CDS
1485314	+	21.13	CACCTACAAAAAACTTGTAACGCTATACGACCGATTTCGATTTGAAAATTA	-2.6	32.88	ykzF_CDS
1485359	+	178.13	AAATTAATGGGACACCCTATAATTGATACTCCACAAAGAGTATCTTTTTTA	-13.3	27.98	ykzF+44
1485928	+	28.5	ACGCTCATTGAATAAGTAGGCTGTACGGTCCTATTTTTATTATATAGGCAG	-10.3	11.33	ykuL+32
1486344	+	11.69	GAGCTTGAAGGTGAAATTCACGGCACATTGAAGCTTGCCGTCGCCTCCATA	-12.9	0	ccpC_CDS
1486952	+	89.69	GCTGGATCAGGAAAATCCATTTTAAAGACAGCGAGGTGCTGTCTTTTTTTT	-15.3	81.82	ccpC+26
1488909	+	38.06	CGCTGTCTGATCACTCACTGGGAACTGCTAAAACGGCTGTTCCTTTTTTTC	-10.6	33.71	ykuP+41
1489732	+	800	AAGGAAAAGTTTGATAAAAAAGGCGTGGATAATATATCCACGCCTTATTCG	-19.1	11.43	dapH+49
1490458	+	29.19	CGCTAGACAGTGCTGTTATTACAGTTGGTACCATTACCGGAGGCTCGGCAC	-10.1	6.96	dapL_CDS
1490906	+	14.94	TTTTTCTGTTTATGCCAATTAAGTACAAATGAAAGAATAAAATTCCATAAA	-3.8	12.5	dapL+29
1491184	-	22.69	AAGAAACAGAATAAATAAAAGAACCGAAGCTTTTTGCTTCGGTTTTTTTAT	-20.8	66.67	ykuT+37
1491219	+	259.31	GAGCAGAATTCAGTAATAAAAAAACCGAAGCAAAAAGCTTCGGTTCTTTTA	-15.3	36.17	ykuS+35
1491303	+	13.63	ACGCGTTCTTTATTTCTTTTCTCAACACTCGTTCGACTCGCCACTGTTCCA	-1	0	ykuS+119
1492854	+	56.88	TTCTTTCCAAGAACGAAAAGCGGTCTAGCATATTCGTTAGGCCTCTCTTTT	-14.5	0	ykuU+51
1493374	+	51.75	ATCTGACTAAATAGTATTTCCTAAAAACCTGACCTCATCAGGTTTTTTATT	-10.1	23.73	ykuV+53
1494406	+	118.31	CGAATAAATATAAAGAAAAACTGCTTGGCATCGCTCAAGCAGTTTTTTTAT	-18.4	82.42	rok+44
1499696	+	128.31	CGCCGGTCAGCGGGGGATGAAAACCGGACGGCATTTCAGCCGTCCGGTTTT	-27.2	95.83	moaD+31
1504389	+	46.75	ATCAATATATACCGGTCTGCCGCTCCGACAAGCGGCAGCGCCGGCAAGGAG	-23.9	12.47	yknX_CDS
1507326	+	127.38	TTGAAGCGCTGCGTTATGAGTAGCCTCATGCAACATGCATGAGGTTTTTTT	-18	85.71	yknZ+28
1511203	+	168.06	CAGAAAAATAAGAAAAAAAGCGTCCTTGGTTCGAAAGGACGCTTTTTCTTA	-19.7	45.26	fruA+40
1511884	-	36.44	TTTTCAAAATAAAAACGCCTGCTGTCCTAGGCCAGCAAGGCGTTTTTATTT	-23.4	84.62	ykoA+39
1511927	+	137	TCAAACAAAATAAAAACGCCTTGCTGGCCTAGGACAGCAGGCGTTTTTATT	-23.4	77.78	sipT+38
1512074	-	13.06	AGGCTTTACCGCCAAAGATATCGGCTTATATATAGGCATAGCCCTTATTTA	-11	0	ykoA_CDS
1513623	+	10.56	AACCTTGTAGACTGGCTTCGCCAATATTCTCCGCACGACCAAAGTGAGAGC	-8	0	ykpA_CDS
1514024	+	247.31	GACTGAACTATACGCCGAATAAAAAAGCAGAGATTTCTCTGCTTTTTTTGA	-14.6	0	ykpA+29
1514716	+	11.88	CCTCGCCACAGAAGCCGGACGTCACACGGCCCAAACTCTTATTGGGGAAAT	-10.7	13.67	ykpB_CDS
1514961	-	129.19	AATTGGGCTTTTTAAGTAAATAAAAGGAGGCTTTTCCGCCTCCTTTTTTTA	-16.7	89.8	ampS+36
1514995	+	473.88	GTATGAAGCAGAAAAATAAAAAAAGGAGGCGGAAAAGCCTCCTTTTATTTA	-16.7	69.89	ykpB+32
1515547	+	29.06	TGGCCATAAACTCATGGCCACTTTCATTCACGCTTCCCGCACCTGCCCAAA	-11	50.59	ykpB+584
1518191	+	154.94	TAAAATTATGCTAAAAAAGGCGGAGTGATATCATCTCCGCCTTTTTTGCGT	-24.1	38.33	abh+48
1521232	+	466.94	CTTCATACAAAATAGCAGCCAAATAAGCCGTCCTCAAAGGGCGGTTTTTCA	-13.2	33.76	ktrC+36
1522149	+	30.69	CGCTCAATGTGCTGCCGGCGGTGAATGAAAAGAACGCACGCCGGTTCTTTT	-17.8	0	adeC_CDS
1522755	+	10.81	GATTCAAGAGCGGAGCGATTGCCACAACCATTTCACACGACTCCCATAATA	-4.9	4.54	adeC_CDS
1522836	+	15.56	TCGCGGCGGCAGTTAATAAGCTGCAGGAAATTGGCGGAGGATTAACAATTA	-11.1	0	adeC_CDS
1523082	-	275.88	ATTATGGAGGTTTAAAAAAAGAGGCACTCCCTAAGGGAGTGCCTCTTTTTA	-27.4	100	rnjA+36
1523118	+	29.25	ACATATCACTGCAATAAAAAGAGGCACTCCCTTAGGGAGTGCCTCTTTTTT	-26.9	60	adeC+34
1523136	-	36	CTTGCACCTTTCTTGTACGAAAAAACAAAGCGCCGTCCAATGATCCTGCCG	-4.5	27.53	rnjA_CDS
1523540	-	18	ATGTCAAACTTGCAACAGATTGTGGCATCCCAGAGGAAAACTGCTTTATCA	-5.9	0	rnjA_CDS
1523643	-	10.56	ACATCCGGTCACGGCGGACAGGAAGAACAGAAGCTGATGCTTCGTTTAATC	-16.3	14.78	rnjA_CDS
1524021	-	11.06	CAGCAGGTAATTGAAGCTGCTGTACAAAATGGAAGAAAAGTTGCCGTATTT	-9.9	5.23	rnjA_CDS
1524042	-	18.94	GCGTCGAATATTCACCGCTTGCAGCAGGTAATTGAAGCTGCTGTACAAAAT	-15	0	rnjA_CDS
1524097	-	12.88	AAGCATTCATGACATTTTCCGCAAGGTGGACGGCCGAATTATCTTCGCCAC	-11.9	2.08	rnjA_CDS
1524194	-	12.69	TGGCCGAAATCGGTAAAGAAGGCGTTTTGTGCCTTCTTTCAGACAGCACAA	-17.3	7.42	rnjA_CDS
1524882	-	12.13	TTATATTGAAGGCGTATCTGAGCGTGACGTCAGAACAAAGCTGAAAGAAAA	-7.1	3.1	ykzG_CDS
1526156	-	467.44	ATTGAGCGCTAAAAGAGAAAACGGCTGGCACAATGCCAGCCGTTTCTTTAT	-24.1	90.98	def+39
1526193	+	126.81	TGGGCCTTTTAAAATAAAGAAACGGCTGGCATTGTGCCAGCCGTTTTCTCT	-21.9	70.59	ykrA+34
1526553	-	11.38	AGCCGAAAAATACAAGCTGCGCCCTGGCGTAGGACTCGCAGCTCCTCAAAT	-13.9	0	def_CDS
1526848	+	10.94	ACAAAGGTGCAACGAAACGAATGACCAGCCGTATATGGCTGGTCAATTTCA	-18.2	60	ykrA+689
1527923	+	32.5	GCTGCAGGCTATCGTGTGAAAAAGAGCTGACTCGATCAGCTCTTTTTTTGA	-17.8	8.33	ykyA+21
1528354	+	10.56	AGAAAGGAAGAGGTGACTTAGTATGGCTGCAAAAACGAAAAAAGCTATCGT	-5.1	0.89	pdhA_CDS
1528358	+	10.81	AGGAAGAGGTGACTTAGTATGGCTGCAAAAACGAAAAAAGCTATCGTTGAC	-5.1	1.69	pdhA_CDS
1528364	+	13.38	AGGTGACTTAGTATGGCTGCAAAAACGAAAAAAGCTATCGTTGACAGTAAG	-6.2	0	pdhA_CDS
1528371	+	14.25	TTAGTATGGCTGCAAAAACGAAAAAAGCTATCGTTGACAGTAAGAAGCAAT	-6.2	2.59	pdhA_CDS
1528409	+	53.5	AGTAAGAAGCAATTTGATGCCATTAAAAAGCAGTTCGAAACGTTCCAAATT	-3.5	1.27	pdhA_CDS
1528460	+	28.5	TTAAATGAAAAGGGAGAAGTCGTGAATGAAGCGGCGATGCCTGATTTAACT	-10.8	13.78	pdhA_CDS
1528699	+	30.75	GCCTCAGTTAATTTGGCACGGCCTTCCATTATATCAAGCGTTTCTTTTCTC	-3.9	6.3	pdhA_CDS
1528886	+	17.19	ATCACTTACACTGGTGACGGCGGAGCTTCTCAAGGGGACTTCTACGAAGGA	-12.4	0	pdhA_CDS
1528987	+	23.81	CAACCGTTACGCGATTTCAACTCCTGTTGAAAAACAATCTGCAGCTGAAAC	-8.1	0	pdhA_CDS
1529030	+	12.56	GCTGAAACAATTGCACAAAAAGCTGTAGCTGCCGGTATTGTCGGCGTACAA	-10.2	0	pdhA_CDS
1529180	+	19.19	TTCCGTTATGGCCCGCACACAATGGCTGGTGACGATCCTACTAAATATCGT	-9.2	4.36	pdhA_CDS
1529338	+	11.75	TGAGGATGCGAAAGAAGAAATTAAGCAAGCGATCAAAAAAGCTGATGCTGA	-6.2	7.19	pdhA_CDS
1529360	+	19.69	AAGCAAGCGATCAAAAAAGCTGATGCTGAACCGAAGCAAAAAGTAACTGAT	-6.1	0	pdhA_CDS
1529504	+	52.88	ATGACAATGATTCAAGCAATCACGGATGCGTTACGCACAGAACTGAAAAAT	-3.1	0	pdhB_CDS
1529603	+	18.81	GTATTCCGTGCGACAGAAGGATTGCAAAAAGAATTCGGTGAAGACCGTGTG	-10.5	0	pdhB_CDS
1529873	+	13.13	GAACTTCACGCTGACAGCTTGGAAGGTCTTGTTGCACAACAGCCTGGTATC	-8.5	19.58	pdhB_CDS
1529915	+	16.88	CCTGGTATCAAAGTTGTTATTCCATCAACTCCTTACGATGCCAAAGGACTT	-11.1	4.11	pdhB_CDS
1530082	+	19.63	TGACGTGAAACGTGAAGGTACTGATCTTTCAATCATCACTTACGGCGCAAT	-9.5	13.9	pdhB_CDS
1530426	+	23	ACCATAAAGACGTTCTTGAAACAGCAAGAAAAGTGCTTGAATTTTAATCAA	-6.8	12.4	pdhB+4
1530470	+	315.38	TAATCAAACTGCATAATCGAGAGGGAAGATGAACGTTTTCCCTCTATTATA	-15.4	0	pdhB+48
1530500	+	11.25	GAACGTTTTCCCTCTATTATATATCTGTTTTCAATGCTTACGATGTAAACT	-2.6	0	pdhB+78
1530823	+	12.94	TGGTTACGAAGATCTTCAATTTAAAGGCAGCGACGAGTCTGACGATGCGAA	-4.6	0	pdhC_CDS
1530902	+	19.5	GAAGCTGGACAAGACGTTGCGAAAGAAGAGCAAGCTCAAGAGCCTGCAAAA	-9.7	0	pdhC_CDS
1530979	+	98.56	AGCTGAAGTTGACCCGAACAAACGCGTGATCGCTATGCCTTCCGTACGTAA	-5.8	1.84	pdhC_CDS
1531114	+	17.31	CTTTGTAAACGGAGGAGCGCAAGAAGCTGCACCGCAAGAAACAGCTGCACC	-7.4	0	pdhC_CDS
1531183	+	29.75	ACCGGCTGCTGCACCAGCTCCAGAGGGCGAATTCCCAGAAACACGCGAAAA	-9.1	8.67	pdhC_CDS
1531438	+	16	CCCTGTTTTAAACACGTCAATTGACGATAAAACAGATGAAGTCATCCAAAA	-10.3	4.36	pdhC_CDS
1531643	+	10.19	ATGAAAGGCGCATCTTGCACAATTACAAACATCGGTTCTGCCGGCGGACAA	-5.2	0	pdhC_CDS
1531672	+	37.31	CATCGGTTCTGCCGGCGGACAATGGTTCACTCCGGTTATCAACCATCCAGA	-14.1	0	pdhC_CDS
1531779	+	12.56	AAATCGTAGCAGCTCCAGTCTTAGCTCTTTCTCTCAGCTTCGACCACCGTA	-5.9	0	pdhC_CDS
1531804	+	14.81	TCTTTCTCTCAGCTTCGACCACCGTATGATCGACGGAGCAACTGCGCAAAA	-6.6	2.25	pdhC_CDS
1531956	+	300.06	CTTGTAATTGGTGCGGGACCTGGCGGCTATGTAGCTGCCATCCGCGCTGCA	-25.2	1.65	pdhD_CDS
1532063	+	11.63	GAACGTTGGATGTATCCCTTCAAAAGCGCTGATCAATGCAGGTCACCGTTA	-10.6	9.44	pdhD_CDS
1532245	+	14.81	GCAACAAAGTAGATGTTGTAAAAGGTGAAGCTTACTTTGTAGACAGCAATT	-9.2	30.53	pdhD_CDS
1532270	+	19.13	TGAAGCTTACTTTGTAGACAGCAATTCAGTTCGTGTTATGGATGAGAACTC	-7	0	pdhD_CDS
1532279	+	18.56	CTTTGTAGACAGCAATTCAGTTCGTGTTATGGATGAGAACTCTGCTCAAAC	-8	0	pdhD_CDS
1532293	+	28.38	ATTCAGTTCGTGTTATGGATGAGAACTCTGCTCAAACATACACGTTTAAAA	-12.5	0	pdhD_CDS
1532497	+	33.56	CTGCGTATGCTAACTTCGGTACTGAACTTGTTATTCTTGAAGGCGGAGATG	-5.2	0.95	pdhD_CDS
1532584	+	10.69	TCGTTACACGCAGACTGAAGAAAAAAGGCAACGTTGAAATCCATACAAACG	-0.8	3.79	pdhD_CDS
1532641	+	28.44	CTAAAGGCGTTGAAGAAAGACCAGACGGCGTAACAGTTACTTTCGAAGTAA	-6	0	pdhD_CDS
1532670	+	15.19	GTAACAGTTACTTTCGAAGTAAAAGGCGAAGAAAAAACTGTTGATGCTGAT	-9.6	0	pdhD_CDS
1532709	+	18.25	GTTGATGCTGATTACGTATTGATTACAGTAGGACGCCGTCCAAACACTGAT	-8.8	0.35	pdhD_CDS
1532842	+	12.94	CTAACATTTATGCAATCGGTGATATCATCGAAGGACCGCCGCTTGCTCATA	-10.8	0	pdhD_CDS
1532913	+	16.81	ATCGCTGCAGAAGCTATCGCTGGAGAGCCTGCAGAAATCGATTACCTTGGT	-13.7	0	pdhD_CDS
1532919	+	18.69	GCAGAAGCTATCGCTGGAGAGCCTGCAGAAATCGATTACCTTGGTATTCCT	-11.4	11.32	pdhD_CDS
1533063	+	14.19	CCATTTGCAGCAAACGGCCGCGCGCTTTCTCTTAACGAAACAGACGGCTTC	-8.4	0	pdhD_CDS
1533283	+	77.5	TGGAAGCTGCTGAAGTGGCAATCGGAAGTCCGATTCACATCGTAAAATAAT	-11.4	5.56	pdhD+1
1533289	-	38.19	GCTGTCAAAATAAAAAAACAGCCCTCGCTCAAAGCGGGGCTGTTTTTGATA	-22.1	26.83	slp+38
1533328	+	5887.81	AATAATTTTCATATCAAAAACAGCCCCGCTTTGAGCGAGGGCTGTTTTTTT	-21.6	99.85	pdhD+46
1534237	-	51.06	ATTCAATAAAAAATAAAAAGCATGCGGCTTTAAGCCGCATGCTTTTTTTTA	-23.1	93.33	speA+42
1534276	+	40.94	TTGATGAAGAGTAAAAAAAAGCATGCGGCTTAAAGCCGCATGCTTTTTATT	-23.6	88.89	ykzW+37
1536201	-	110.69	AAGTAACACAAGCATAAAAAAGAGCCGGGATATCCCCCGGCTCTTTTTCTT	-22.2	84.38	yktB+34
1536238	+	33.75	AAGATTAAGATGTAAGAAAAAGAGCCGGGGGATATCCCGGCTCTTTTTTAT	-26.8	90.48	yktA+36
1536650	-	10.81	AAAGCACGCAAGAAGATCCGTCAATCCCCCGGCTGACAGCTGGGTGGCGTT	-15.1	0	yktB_CDS
1538724	-	21.13	AATAATTTTCAAATCATCAGAAGCCTCTCAATGTTTGAGAGGCTTTTTATT	-17.8	9.09	yktD+46
1538760	+	10.38	CTGCATGCGGGTTCAATAAAAAGCCTCTCAAACATTGAGAGGCTTCTGATG	-16.3	11.11	ykzC+68
1539737	+	15.75	AATGATCCTCCACAAAAAATAAGATTCCCCTGGCCAGGAGAATCTTATTAT	-13.4	17.14	ykzC+1045
1539999	-	10.44	CTGTTGGATTGTAATATTAGGAAAAGCCTGAGATCCCTCAGGCTTTTATTG	-17.5	22.58	nprE+37
1544893	-	16.38	AGGCTTAATGTAAAAAAGCGCTTGCCGGAATCGGACAAGCGCTTTTTTTAT	-22.4	50	ylaE+43
1545757	-	948.25	GCCGGCGACATTGTAATCAAAAAACACCGCAAAGAAAGCGGTGTTTTTCAT	-14.9	73.24	ylaF+63
1546703	+	23.31	CGAAACAACAGGATGAAAACATGGAAGCTTTATATGAAACCATTATTAAGC	-3	0	bipA_CDS
1547100	+	11.38	AATGACATTTGTCGTGAATAACAGTCCGTTTGCAGGCCGTGAAGGCAAATA	-8.9	0	bipA_CDS
1547326	+	10.38	AAACCTGAAGTTATTATCAAAGAAATCGACGGCGTACGCTGTGAGCCTGTT	-7.2	0	bipA_CDS
1548100	+	19.5	CCGCTCTATATCAAGTAGACCGGCAGCCTGCGGCAGGCATGTGGCTGCTGT	-21	0.29	ylaH_CDS
1548109	+	15.69	ATCAAGTAGACCGGCAGCCTGCGGCAGGCATGTGGCTGCTGTACGGCACGA	-18.3	3.89	ylaH_CDS
1548135	+	12.19	GGCATGTGGCTGCTGTACGGCACGATTTTTGTGTTGGCCGTTATTGTATTT	-13.1	0.12	ylaH_CDS
1548172	+	24.5	CCGTTATTGTATTTAAGCTTGGATTTGCTAAACGGCTTCCTGTATTAAAAT	-5.8	0	ylaH_CDS
1548322	+	42.06	TTTTAATCATTTACAAAATCCGGCTGTATCAGTCGAAAAAAGGACAGTCTG	-6.7	57.48	ylaH_CDS
1548328	-	165.38	TAACCATACAGAACACAAAAAAGACTCAGCTTTCAGCTGAGTCTTTTATGA	-19	70.09	ylaI+61
1548364	+	424	GACAGTCTGCAAAATCATAAAAGACTCAGCTGAAAGCTGAGTCTTTTTTGT	-19	92.73	ylaH+31
1550622	-	242.06	CTGTCTAAATATGGGTGATCAATTTGTTCAGGGTCGCCCATTAAGACAATT	-19.1	70.97	ylaL+175
1550775	+	14.5	TCAGGCAGCGTGAAGCTGTTAAAAGGTGAGAGATCAGGTCTCGCCCAGCTT	-17.9	11.63	ylaK_CDS
1552693	+	25.25	ACATTGGAGCGCGAATTGTCTGCTTTGCATGACGCGTTTACAGCTAAATAA	-9.8	16.98	ylaN_CDS
1552734	+	1346.94	AGCTAAATAAATGATAAAACTCAAACTTATTAACAGTTTGGGTTTTTTTAT	-12.5	68.25	ylaN+41
1553354	+	34.31	CAAAGTTATATCGACCATCTGTTAACGGGAGTAGCCCCTCCGGTAGTCATG	-7.8	8.17	ftsW_CDS
1553560	+	11.69	CAGCCCTATTATCTATTTGAATCAGGACAAAATTTTAACTGAAGGCCGTTT	-4.3	2.71	ftsW_CDS
1553727	+	12	AAAGTATCCAAAAATACGGATATCTGCCTGAATCACACACTGACTTTATTA	-5.7	12.43	ftsW_CDS
1553772	+	16.06	TTATTATGGCTGTCATTGCTGAAGAGCTCGGCATTTTTGGGGTATTGTTTG	-8.8	0	ftsW_CDS
1554070	+	38	TGTGAAATATTCAGAGAATAAGAAAAAGAAAGAGCCCTTGGCGCCGAAGGG	-5.9	0	ftsW_CDS
1554156	+	18.25	TGTAAAAAACAAGTGTGTACAGGGGAAGGATATTCCGCTATGATAGATTAT	-8.7	0	ftsW+46
[truncated: 3,391 more rows]

## Sheet: nusG deletion
3' End	Strand	CV	3' end and upstream 50 nt	ΔG-51nt (kcal/mol)	%T	Relative Position
19	-	39.56	CCACAGGGGTTGGTAATGTGAAAATGTTGTCGATAACCTCTGTGGATACTA	-19.7	28.79	misc.
270	+	65.13	GATTGATTTCACACAGCTTGTGTAGAAGGTTGTCCACAAGTTGTGAAATTT	-15.6	0	misc.
549	+	11.38	AACCAAAGCCCACTCACTGCAAGGCGATACATTAACAATCACGGCTCCCAA	-2.7	4.54	dnaA_CDS
1247	+	10.38	CACGTTTTGAATGGGGACTTATTACAGATATCACACCGCCTGATCTAGAAA	-3.4	12.63	dnaA_CDS
1839	+	256.94	TTCGGAAGTCATACACAGTCTGTCCACATGTGGATAGGCTGTGTTTCCTGT	-24.5	6.18	dnaA+89
1887	+	22.13	TGTCTTTTTCACAACTTATCCACAAATCCACAGGCCCTACTATTACTTCTA	0	4.73	dnaA+137
3112	+	1133.94	TCAGAACCTATTAATCCGATACACTGCTGCCGACCCGTCGGCAGCTTTTCT	-14.8	50.3	dnaN+37
3777	+	19.88	TCATATTGAACAGCAAAAGCTCAGCCAGTATGTCGGGGCCCTCAACACCAT	-8.3	0	recF_CDS
4006	+	20	GACCGGACGATGCTCGATGTTCTGACCGATCAGCTTGTAGAAGTTGCAGCA	-9.5	0	recF_CDS
4342	+	140.19	GGACAGCAGCGAACGACGGCGTTGTCCCTTAAGCTGGCGGAGATTGACCTG	-14.3	25.16	recF_CDS
4581	+	12.25	TGGTGCGTTAGTGAAGTGAAGAAATGAGGTGAGCAATTGTATATTCATTTA	-4.6	3.87	yaaB_CDS
4769	+	55.88	TATCGTAGTCACGGTTCAGAATATATATTACTCTCCCTTATCTTCCAGCAC	-2.2	5.41	yaaB_CDS
6045	+	14.13	GATAAAGGTTTAATGGCGGCAAGAGCAAGAATGGCTGCGAAAAAAGCGCGT	-7.9	2.49	gyrB_CDS
6425	+	16.06	TGTTGACGGCGCGCACATCAGAACACTGCTGTTAACGTTCTTTTACAGATA	-11.5	0	gyrB_CDS
6773	+	15.06	AGAACCGCGCCGAAACTTCATAGAAGCGAATGCGAGATACGTTAAAAATCT	-5	42.45	gyrB_CDS
6827	+	370.63	CATCTAATCATAAAAAGCCTTATTTCCAATAAGAAATAAGGCTTTTTTCTG	-17.6	27.2	gyrB+44
7717	+	153.94	TGGGACGCAGCGGTATCCGGAAAGCATACGAATCAGGCCGAGGCTCTATCA	-10.1	0	gyrA_CDS
8053	+	17.56	TTGTTGATGGCCAGCCGAAAGTTTTAACTCTTAAGCAATGCCTGGAGCATT	-7.8	0	gyrA_CDS
9278	+	12.88	GAACAACGGCCAACTAGTAGCAGTGAAAGCTACTAAAGGTGAAGAGGATCT	-10.7	5.34	gyrA_CDS
9494	+	578.25	ACAAGAAGAAGTGTGAAAAAAAGCGCAGCTGAAATAGCTGCGCTTTTTTGT	-21.2	87.76	gyrA+35
9671	+	83.44	ATGTTACTATTAAGTAGTCGCTTTGAGAGAAGCACACAAAGTTCTTTGAAA	-8.2	4.04	gyrA+212
9748	+	15.94	AATTCATTTTTATAAATCGCACAGCGATGTGCGTAGTCAGTCAAACTAGGG	-9.3	21.31	gyrA+289
9783	+	111.13	GTCAGTCAAACTAGGGCCTGCACGACGCAGGTCACACAGGTGTCGCCGCAG	-16.5	47.92	gyrA+324
9806	+	225.13	GACGCAGGTCACACAGGTGTCGCCGCAGGATGCGGTGAACTTAACCTGTGA	-25.4	47.75	gyrA+347
11430	+	216.06	ATATAAGACCTTGGGTCTTATAAACAGAACGTTCCCTGTCTTGTTTAGTTT	-13.6	0	gyrA+1971
11538	+	1560	GCGCACGCCTGATAAGCGTGAGGTCGGTGGTTCGAGTCCACTCAGGCCCAC	-18.4	14.71	gyrA+2079
11628	+	13482.3	CCTGCTTTGCACGCAGGAGGTCAGCGGTTCGATCCCGCTAGGCTCCACCAA	-19.3	29.08	gyrA+2169
11667	+	173.5	AGGCTCCACCAACGTGTTCTTTGAAAACTAGATAACAGTAGACATCACATT	-3.4	50.53	gyrA+2208
11690	+	34.81	AAAACTAGATAACAGTAGACATCACATTCAATTAGTAACACAAGATATCAC	-0.1	26.72	gyrA+2231
11710	+	71.44	ATCACATTCAATTAGTAACACAAGATATCACATAGTGATTCTTTTTAACGG	-5	91.46	gyrA+2251
14634	+	14.69	AGTGTGGCGACACATGGAGCTGACAGATACTAATCGATCGAGGACTTAACC	-8.8	100	gyrA+5175
14691	-	12.94	TCCGTGTTCGGTATGGGAACGGGTGTGACCTCTTCGCTATCGCCACCAAAC	-11.5	100	misc.
14807	+	30.5	CGCCGATGGTAGTCGGGGGTTTCCCCCTGTGAGAGTAGGACGCCGCCAAGC	-15.1	100	gyrA+5348
15441	+	33.25	CCGAATAAATGTTTCATAAAATGTACGCATAGGCCATTCCGTTGTATTTTC	-3.2	10.32	gyrA+5982
16127	+	38.44	ACAGAATCAGCAATGGCAATTGCAATGGCAAGACAGGGCGGCTTGGGCATC	-9.8	7.97	guaB_CDS
16224	+	21.69	AAGTAAAGCGTTCTGAGCGCGGCGTTATCACAAATCCCTTCTTTTTAACTC	-4.9	4.39	guaB_CDS
16255	+	10.13	AAATCCCTTCTTTTTAACTCCTGATCACCAAGTATTTGATGCGGAGCATTT	-7.8	0	guaB_CDS
17029	+	27.06	AGCCGGCGGACATGCTGTTATGCTCGGAAGCTTGCTTGCAGGCACATCAGA	-13.6	0	guaB_CDS
17367	+	11.63	TTCGCGAAAGCCATCCGCATGACGTACAGATTACAAAAGAATCACCTAACT	-3.2	53.67	guaB_CDS
17376	+	16.38	GCCATCCGCATGACGTACAGATTACAAAAGAATCACCTAACTATACAATTT	-1.1	6.97	guaB_CDS
17396	+	26.94	ATTACAAAAGAATCACCTAACTATACAATTTCATAATAAATTGTTACAAAT	-2.7	2.56	guaB+15
17435	+	636.19	ATTGTTACAAATTAAAAACATTTGACAGGGTCTCTGACTCTGTCTATTTTT	-12.8	95.84	guaB+54
17707	+	15.38	GCTGCTATTATGATCGAAGCTTCTTCAGGTAAAATTCTTTACAGTAAAAAT	-3.6	0	dacA_CDS
17930	+	15.94	GGAAATACACAGTAAAAGAATTATATCAAGCTACAGCAATTTATTCTGCAA	-2.2	0	dacA_CDS
17982	+	20.19	TGCTGCTGCTATTGCGATTGCAGAAATCGTTGCCGGTTCTGAAACTAAGTT	-9.8	0	dacA_CDS
18131	+	16.44	AGCCTGAGGGGACAAGCGTAAATGAAGAAAGTGAAGTTTCTGCAAAGGATA	-7.5	1.91	dacA_CDS
18223	+	46.75	ATACTGGAGACTTCCAGTATCGCCAAAACGAAATTCAGAGAAGGCACCGAT	-13.7	11.28	dacA_CDS
18437	+	18.31	TAAACGCAAAGGGCAACCTTCATACAGGCCGTTTCGATGAAACGAAAAAAA	-8.3	0	dacA_CDS
18907	+	713.44	TGGTTTTAATCAATTGAAAGAGCTCTGATGGATGTTAGGGCTCTTTCGCGT	-20	47.44	dacA+42
20190	+	23.81	CGTATCAATTCATGGAGCCGCTTCGTGAATTCGCTGCTCAGGGCAAACCGA	-14.1	7.16	yaaE_CDS
20844	+	1622.56	GGTGGCAACGCGAGAGCTCTCGTCCCTTTATGGGGATGAGGGCTCTTTTTA	-31.4	40.89	yaaE+286
22197	+	761.25	TGAAACCGTAAATTATGGAAAGGCGTGCCTGACAAGGTGCGCCTTTTTGCT	-22.4	96.42	serS+40
22384	+	716567	CCGACAGGGGTGTCAAAGCCCGCGGGGGTTCGAATCCCTCTTCCTCCGCCA	-17.9	83.35	serS+227
22428	+	154.06	TCCGCCATATTGATTTTAATTCTAATGAAACACAAGCATATATTGGAGATT	-3.5	67.54	serS+271
22464	+	7247.31	CATATATTGGAGATTGTTTTGTCCGTTGCATTCGGTGCGGCGGATTTTTTA	-14.9	86.78	serS+307
22470	-	104.56	TATTCATGATAATCAAAAAAAGTGAATCTCAGTCGAGATTCACTTTTTCTT	-17.8	91.84	dck+26
22508	+	365.69	TTTTTTATTTTAAAGAAAAAGTGAATCTCGACTGAGATTCACTTTTTTTGA	-19.7	11.55	serS+351
22720	+	42.75	GCTTGTCTGAAGCTCCATCTCACGGCCGCGTTGTTCAATCCGGTTTAAAAT	-8	0.72	serS+563
22844	+	10.69	AAAAGGCTTGTGTAAGTCTTATAATCAACCTTTGACATTGTCCCTTTATCA	-5.2	9.12	serS+687
23889	+	46.56	TGCCCCCATGAAAAAAAGACGTTTCCAAATTATCGAAACGTCTTTTTGACA	-14.6	1.53	serS+1732
26528	+	109.63	AATCCCTTCTCGAGGTTCGTTTACTTTAAGGCCTGCCTTAAGTAAGTGGTG	-13	0	tadA+191
26687	+	34826.4	AACTGCTTAAGTAACGCTTAGGGTAGCGAATCGACAGAAGGTGCACGGTAA	-8.1	87.4	tadA+350
26734	+	2175.81	GTAAATCAATCATCAAATTTTCAGACTCACCTAATATTAGGTGAGTTTTTT	-14.6	58.67	tadA+397
27078	+	11.5	CATGCAACGAATGTGCGGCCTGTAAAGGGATAACAAACGGGTCAATATCCG	-10.6	9.8	dnaX_CDS
27176	+	51.56	CGTGACATTCGCGATAAAGTGAAGTTTGCCCCATCGGCCGTCACATATAAG	-13.3	4.68	dnaX_CDS
27264	+	27.25	GCGCTTTTAATGCATTACTAAAAACATTAGAAGAGCCGCCTGAGCATTGTA	-10.7	0	dnaX_CDS
28959	+	566.81	ATGAAATTGCCAGGGATCGGACCGAAAACAGCGGTTCGTCTGGCTTTTTTT	-20.1	30.29	recR_CDS
29783	+	82.94	AAGCTTGTACTAGAACAAGCGAAGGAGATGAGAAGATTCATGGAGCCTATT	-12	8.8	bofA_CDS
30203	+	526.31	TGTTATGATAATAAAGTCGCTTAAACGAGCGGTAAACAAAGTTCTTTGAAA	-6.2	56.3	bofA+168
30231	+	18.13	GCGGTAAACAAAGTTCTTTGAAAACTAAACAAGACAAAACGTACCTGTTAA	-3.4	28.05	bofA+196
30290	+	25	TATAAATCGCACAGCAATGTGCGTAGTCAGTCAAACTACTTTATCGGAGAG	-10.4	0	bofA+255
31898	+	205.94	ATATAAGACCTTGGGTCTTATAAACAGAACGTTCCCTGTCTTGTTTAGTTT	-13.6	0	bofA+1863
32006	+	1517.38	GCGCACGCCTGATAAGCGTGAGGTCGGTGGTTCGAGTCCACTCAGGCCCAC	-18.4	16.02	bofA+1971
32096	+	13556.1	CCTGCTTTGCACGCAGGAGGTCAGCGGTTCGATCCCGCTAGGCTCCACCAA	-19.3	33.43	bofA+2061
32135	+	177.81	AGGCTCCACCAACGTGTTCTTTGAAAACTAGATAACAGTAGACATCACATT	-3.4	46.32	bofA+2100
32178	+	49.13	ATCACATTCAATTAGTAACACAAGATATCACATAGTGATTCTTTTTAACGG	-5	77.03	bofA+2143
35236	+	1135.75	GCTCTCACATCCTGTGAGAAACGCCCAGTACCTTCATCCTGAAGGCATTTG	-14.4	60	bofA+5201
35236	-	24.19	TCCGTGTTCGGTATGGGAACGGGTGTGACCTCTTCGCTATCGCCACCAAAC	-11.5	97.94	abrB+9611
35352	+	27.13	CGCCGATGGTAGTCGGGGGTTTCCCCCTGTGAGAGTAGGACGCCGCCAAGC	-15.1	100	bofA+5317
35746	+	290.75	AGCATTCATACACCGCCATTATATTCATAGACCTGAAAAGGTCTTTTTTTG	-8	23.81	csfB+21
37817	+	13.56	TTCTCATTCATTTCATGTTCCGGGACATCACAATGGAGATGTCTTTTTTGA	-8.9	0	yaaO_CDS
37939	+	19.06	ATCATCCTTCTGGGGTGATTAAGGAAGCTCAGGAGCTTGCCAGTCAATTAT	-14.3	0	yaaO_CDS
38707	+	23.56	TCACGGATCCGCTAAAGCTCACAATTCGTTCAAAACGCGGGCATTCTGGCT	-7.9	0	yaaO_CDS
39320	+	44.75	CGAGAGCCAGGCGGAATAGATATTGCAGAACAAATTAGAGAGGTTATTCTG	-3.1	1.89	tmk_CDS
39497	+	28.06	TTCATAGACAGTTCTCTTGCGTATCAAGGATATGCAAGAGGGCTTGGAATT	-22.1	0	tmk_CDS
40232	+	10.69	TGAATTTCATCAATTTTAAGGATCTGAAACTGTGAAAATTAATAAAGATAT	-4.8	27.89	yaaR_CDS
40853	+	62.25	CTGCTTCTTGCAAAAAGCTTCTTTTGTCTGGAGGGTGGCGCGGAGCCTTGT	-12.6	0	holB_CDS
40917	+	11.31	ACTGTAAACGGATAGAGTCAGGGAACCATCCTGATCTCCATCTTGTTCAGC	-18.1	0	holB_CDS
42855	+	23	AGTGTTCGAAAAGAGGATTGTCTTTTCTGTCTGTCATTCTTAAATAAAAAA	-6.7	33.49	yabA_CDS
42895	+	850.56	TAAATAAAAAATAGGGAAAAGGCTTCCGCATAAGACGGGAGCCTTTTTCAA	-21.7	34.63	yabA+37
44797	-	905.69	TCATTTCTTGTACAAAAAACGTTCTTGTTATGACACAAGAACGTTTTTTTA	-16.7	95.91	abrB+51
44829	+	116.13	GCTTACCATATTAAGCAATAAAAAAACGTTCTTGTGTCATAACAAGAACGT	-17.5	27.78	yabC+30
44841	-	15.19	AAATCATCAGCGAAATCCAAAACCAGCTTCAAAACCTTAAATAATCATTTC	-1	56.14	abrB+7
44992	-	12.13	AAAGATGCTCTTGAAATCTATGTTGATGATGAAAAAATCATCCTTAAAAAA	-7.2	0	abrB_CDS
45609	+	16.13	ATATGATTTGCACTTATCGCCGCTCTCGTCCTTTGGGCGGGAGCTTTTTGA	-18.3	0	yabC+810
47628	+	12.38	AGGTCGTATCTATCGATCAGTCGTTACCAAAAGGCACAAGAATTAAATAAT	-6.8	1.2	metS+1
47680	+	664.25	ATAAACAAAAGGTGTTTCACGTGTAACAATTCGTCGAACACCTTTTGTGTT	-20	44.73	metS+53
48706	+	106.69	AGCCTTTTAGATACTCTATATAATCTCTCCGAGGAGAAGGAGGCGTTTTTC	-10.4	19.35	yabE_CDS
48962	+	11.56	TTGATATAAAGACAAGAGACGAAGACAAGATCACACCTGCTAAACAGACAA	-1.1	5.56	yabE_CDS
49236	+	58.94	GAATGATGCAGGGAAACAAAAGAAGATCTGGACGACTTCGACTACGGTCGC	-6.1	2.79	yabE_CDS
49357	+	78	CTGACGAAAGGAAAGGCTGATATTACAATTACTCGTATCGAAAAGGTCACC	-4	9.62	yabE_CDS
49591	+	10.94	AGCAAAGATAAAGTGATTGCTGTCGGCACAAAGCAAAGCAGTCCAAAATTT	-9.9	0	yabE_CDS
49679	-	32.38	GACGCCTGTCGCTGTATGTCCTGAACAACCGCTGCAGCTTGCCGTATAAGC	-9.4	14.76	gerD+108836
49987	+	243.31	AATTAGTATATACTTATGTATTCAGAGGGTTTTGCGCCCTCTGTTTTTTTC	-15.8	53	yabE+45
51532	+	214.88	AGCGCTGTCTAACGGATTGTATAAAGCCCTTTTCTAAAAGGGCTTTTTGTT	-14.1	27.95	ksgA+14
52593	+	65.75	GTCCAATTAACAGTTGAAAACCTGCATAGGAGAGCTATGCGGGTTTTTTAT	-19.6	48.39	yabG+41
52894	+	248.13	CGCCGAAAAACGATTGAGCGTTCGGGCATTTTAGCTGAGACGTACCCTTCT	-9	4.24	veg_CDS
53033	+	92.94	TGACATTTAATGATGACGCCGCAAGCTCAGTGGCATTTTAACGGGCAGTGA	-8.7	40.8	veg+10
53056	+	1532.06	AGCTCAGTGGCATTTTAACGGGCAGTGAACCTTTTGTTTACTGCTTTTTGT	-14.6	58.36	veg+33
53221	+	11.75	GAGTTGTTTCGTTTGGGCAGACGTCGTGGAGTTATGTCAGATGAGTTTAAA	-9.9	0	sspF_CDS
53407	+	315.31	AATAACCGATAAGGATGTGACCCGGGGGACGTGCTGTTCCCTGGTTTTTTT	-17.5	53.6	sspF+39
55713	+	887.06	GGTGAAATAATAAGAAAAGTGATTCTGGGAGAGCCGGGATCACTTTTTTAT	-21.1	67.24	yabJ+41
56030	+	11.38	GGAAACAATGGTCTTTTCGTTGCGATGCCGAGTAAACGCACCCCTGATGGA	-6.4	0	spoVG_CDS
56226	+	471.06	AAGGACTGCTGAAAGGGCTGACATAAGCCTTTTGCCGGCGGTCCTTTTTTA	-27	94.16	spoVG+67
57009	+	79.19	TAGAGATTCTTAAAAATGAAGGCGAAACTGTTGCCGCTTACCAGACTGGTA	-8.8	0.73	glmU_CDS
57686	+	14.75	GAAGATGTACCTGGAAAAGCACTTGCTATTGCCAGAGCGAGACAAGTAAAT	-8.5	23.93	glmU_CDS
58364	+	13.38	AGCGCCAATTGCGATTATCGATAAACGCCGTCCGCGTCCAAACGTGGCGGA	-15.2	0	prs_CDS
59226	+	11.63	AAGCCAAAAGCCATTCCGCAAACGATTGAGGCTGATATTTCAAGCCTCGAT	-14.5	0	ctc_CDS
59438	+	1468	CGAACAATAATAGCTTAAGGCGTAACCCTCCCGCGGTTACGTCTTTTGTGC	-16.8	59.54	ctc+41
60397	+	98.56	CATTTATTCAATAAAAAGCTTTGGTGTAGACACTAGACCAAAGCGTTTTTC	-15.5	3.21	yabK+37
61632	+	29.56	CAAATGCAGAGTTTCCATGGCCAAATGAACGTGCTTGCGGGCGAAATGGAG	-8.1	7.59	mfd_CDS
62494	+	29.63	GAAAGCAGGTAGCTCTGCTCGTTCCGACAACCATTTTGGCACAGCAGCACT	-12.9	0	mfd_CDS
64206	+	18.88	AAAGAAATTCGAAGAACTCTGAGAATCAGGGAAGGCGATCCGCTTGAGATT	-10.2	0	spoVT_CDS
64703	+	39.31	GAAAATAGGTATGTAAAGAACAGCTCTCCTTGGGACGCTGTTCTTTTTCAT	-16.6	1.44	spoVT+68
66107	+	24.75	AAGGCGCATCGCTTGCGACAGCGGCTTCCTTTGCGGCTGTCGCCGGCCTTA	-24.4	0	yabM_CDS
68214	+	13.94	CATACAATGCAGTAATAATGCTAAAAGTATCGAGGATATGGGGGCTGAATA	-5.2	0	yabO+77
69486	+	30.81	AAATATCCAAATTGAAGGATGAGGATTACGTCACAGAGCTTGCCAGAAGGG	-5.2	4.93	divIC_CDS
70027	+	96.31	TCAAAACGTGGAGGGCGCGGAGCAAGAAGAGGATAACTTGCTGCTTTCTAT	-14.4	5.34	yabR+15
70070	+	3545.81	CTTTCTATAAAATAAATGAAGCATCCGTTCATCCCGACGGATGCTTTTTTA	-17.2	96.64	yabR+58
70257	+	41092	GTACGGTTCATACCCGTGAGGTCGGGGGTTCGATCCCCTCCGCCGCTACCA	-18.2	13.9	yabR+245
70339	+	293.94	GACACCGCCCTTTCACGGCGGTAACACGGGTTCGAATCCCGTACGGGTCAT	-17.2	22.9	yabR+327
70379	+	5037.19	GTACGGGTCATCCTAACAAATCGGTTTCTCTTGCAGAAGCCGATTTTTTTC	-17.1	87.13	yabR+367
74064	+	44	TCTTGAAATCTTTCTCAAAGGCCCAGTCCGTTACGATGGGGCCTTCTTTTT	-15.7	9.52	yabT_CDS
75993	+	25.44	TACCAAATTAGCGGAGCTGCTGATGAAACGGCAGTGCTCCCTAATGGATAT	-19.1	0	tilS_CDS
76295	+	12.69	CTTGAAAAAATCAATTTTTGAAGATCTTGTGATTCCAAACAGCGACCGCAT	-5.8	5.18	tilS_CDS
76916	+	12.88	CCGGCAGTTTATGAAAGCTGATCGGCAGCCTGCTTCCGAGATGGTTATTGT	-13.3	0	hprT+30
76919	+	12.88	GCAGTTTATGAAAGCTGATCGGCAGCCTGCTTCCGAGATGGTTATTGTTTG	-10.6	0.55	hprT+33
76923	+	13.13	TTTATGAAAGCTGATCGGCAGCCTGCTTCCGAGATGGTTATTGTTTGTATT	-7.3	2.11	hprT+37
77016	+	25.5	TGTGGGAGGAGGTAAGGAATGAATCGGGTCTTCCGTAATACCATTTTTTAT	-9.9	0	ftsH_CDS
77169	+	81.5	GACGGGAAAGTTGATAGCGTATCGGTTCAGCCTGTCAGAGGTGTTTATGAG	-11	3.79	ftsH_CDS
77173	+	82.81	GGAAAGTTGATAGCGTATCGGTTCAGCCTGTCAGAGGTGTTTATGAGGTAA	-7.1	3.79	ftsH_CDS
77202	+	38	GTCAGAGGTGTTTATGAGGTAAAAGGGCAGCTGAAAAACTACGACAAAGAT	-6.4	2.76	ftsH_CDS
77259	+	11.81	TTTTTGACTCATGTTCCTGAAGGAAAGGGAGCAGACCAGATATTTAACGCT	-10.4	5.47	ftsH_CDS
77295	+	14.63	CAGATATTTAACGCTTTGAAAAAGACAGACGTAAAGGTTGAGCCCGCGCAA	-4.2	0.11	ftsH_CDS
77342	+	24.94	GCAAGAAACAAGCGGATGGGTGACGTTCCTGACGACCATCATCCCATTTGT	-14.1	0	ftsH_CDS
77501	+	28.19	ACGCGTCAAATTTAAAGACGTTGCAGGGGCTGACGAAGAAAAGCAAGAACT	-7.2	0	ftsH_CDS
77567	+	10.94	GTTTCTGAAAGATCCCCGCAAGTTTGCCGAGCTCGGCGCCAGAATACCGAA	-7.5	15.28	ftsH_CDS
77664	+	28.19	GCCAAGGCTTGTGCAGGAGAAGCCGGCGTACCTTTCTTCAGCATCAGCGGA	-15.6	9.93	ftsH_CDS
77666	+	28.38	CAAGGCTTGTGCAGGAGAAGCCGGCGTACCTTTCTTCAGCATCAGCGGATC	-15.6	8.58	ftsH_CDS
77716	+	30.81	CTGATTTCGTTGAAATGTTTGTAGGGGTCGGTGCTTCCCGTGTGCGTGACT	-9.7	0	ftsH_CDS
77767	+	24.63	TGTTTGAAAATGCGAAAAAGAATGCGCCTTGTTTGATCTTCATTGATGAAA	-5.3	0	ftsH_CDS
77811	+	11	GATGAAATTGACGCAGTCGGACGCCAGCGTGGCGCTGGTCTCGGCGGTGGA	-19.6	0	ftsH_CDS
77978	+	105.63	CTTACTTCGTCCGGGACGTTTTGACCGTCAAATCACAGTGGACCGCCCAGA	-8.3	9.4	ftsH_CDS
78141	+	21.31	TTAGAAAACCTCTTGAATGAAGCTGCGCTTGTAGCGGCTCGTCAAAACAAG	-13	0	ftsH_CDS
78215	+	15.56	TGACGAAGCGACGGACCGTGTAATTGCCGGACCCGCTAAGAAGAGCCGCGT	-10.5	0	ftsH_CDS
78224	+	17.44	GACGGACCGTGTAATTGCCGGACCCGCTAAGAAGAGCCGCGTTATCTCCAA	-8.8	0	ftsH_CDS
78284	+	17.44	CAATATCGTGGCTTATCACGAAGGCGGACACACCGTTATCGGTCTCGTTTT	-13	0	ftsH_CDS
78296	+	11.81	TTATCACGAAGGCGGACACACCGTTATCGGTCTCGTTTTAGATGAGGCAGA	-17	0	ftsH_CDS
78308	+	12.5	CGGACACACCGTTATCGGTCTCGTTTTAGATGAGGCAGATATGGTTCATAA	-16	1.25	ftsH_CDS
78344	+	11.31	AGATATGGTTCATAAAGTAACGATTGTTCCTCGGGGCCAGGCTGGCGGTTA	-7.4	0	ftsH_CDS
78431	+	10.13	AACAAAGCCGGAGCTGCTTGATAAAATTGTCGGCCTCTTGGGCGGACGTGT	-15.2	0	ftsH_CDS
78480	+	13.19	GTTGCTGAAGAGATTATCTTCGGTGAAGTCAGCACAGGGGCGCACAATGAC	-14.8	0	ftsH_CDS
78499	+	25.69	TCGGTGAAGTCAGCACAGGGGCGCACAATGACTTCCAGCGTGCGACGAATA	-11.5	3.17	ftsH_CDS
78669	+	48.19	AGTGATCAAATCGCTTACGAAATTGATCAGGAAATTCAGCGCATCATCAAA	-7.9	0	ftsH_CDS
78946	+	1734.88	AATTCGCTTTCTTTCTAAAAAAACTGCCGGCTGACGCTGGCAGTTTTTTTA	-22.1	76.02	ftsH+49
80774	+	500.94	TGGAAGGGCTTCGTGACCAAACTACCCGCTAAGCTCTTTAGCGGGTTTTTA	-15.5	20.89	hslO+19
82735	+	478.44	CCAATTCGATTAAAAAAAGCCAAAACTCCCGGTTCGCCGGGAGTTTTTTTA	-17.3	93.2	cysK+38
84936	+	28.81	AACGGCCGGTATATGGAGGAGAAAGATGCAGTTCTTTCTCCTTTTGACCAT	-20.2	9.79	pabC_CDS
85560	+	37.63	GAAAATGCAAAGGATATCGGCCTGGAGCTCAAAACGGGCCGATATGAGCTA	-18.8	3	pabC_CDS
85683	+	13.56	GAAGAAGTAAACTATGGAAGCCAAAGCGGAGAAGCAACCTCCGCTCTTCAA	-14.2	0	pabC_CDS
86122	+	19.38	CGCAGATGAAGCAGTGAAAGCCGGTGCATCCATTATCAATGATATTTGGGG	-9.9	5.31	sul_CDS
86698	+	98.13	AAAACAAACTTGGCCAGCGGTTTAAAGTCGATTTAACCGCTGAGCTGGATT	-17.5	4.5	folB_CDS
87570	+	325.63	CGGAAACCGATTGCCGTCTGCTGCCATCATTCAAGATGCAGCAGATGTTTT	-22	9.94	yazB_CDS
88439	+	12.94	GCAAGTACGCGAAAAAATGGCCGTATGCAAACTGCATCTTGACCGCCTGAT	-9	0	dusB_CDS
88687	+	56.94	ACTCACCTCTATTTGCTGCTCACTGCTAGTTTTACGCTGGCAGTTTTTCTG	-12	0	dusB+52
89375	+	18.06	TAGAAGTAGAAACACCTACAATGCACAGCATTCCTGGGGGAGCTTCTGCAC	-12.2	0	lysS_CDS
90211	+	902.19	ATGCTGCTGACGAATGCCCCTTCTATTCGCGATGTGCTGTTATTCCCGCAA	-5.4	14.66	lysS_CDS
90274	+	255.31	TAATAAAAAAGAGCGGTATCCTCCATAGGGAAAGGATGCCGCTCTTTTTAA	-28.3	97.67	lysS+48
90459	+	313.75	AGTTATAATAATAAAGTCGCTTGAACGAAGTGAACAAAATGATCTTTGAAA	-6.9	49.77	lysS+233
90537	+	24.13	ATTCAGTTTTTAAAAATCGCACAGCGATGTGCGTAGTCAGTCAAACTACTT	-10.4	37.04	lysS+311
92155	+	213.88	ATATAAGACCTTGGGTCTTATAAACAGAACGTTCCCTGTCTTGTTTAGTTT	-13.6	50	lysS+1929
95236	-	12	TCCGTGTTCGGTATGGGAACGGGTGTGACCTCTTCGCTATCGCCACCAAAC	-11.5	100	gerD+63279
95351	+	30.88	GCGCCGATGGTAGTCGGGGGTTTCCCCCTGTGAGAGTAGGACGCCGCCAAG	-16.2	0	lysS+5125
95448	+	2765.06	GCATCTGCCTTACAAGCAGAGGGTCGGCGGTTCGAGCCCGTCATCCTCCAC	-16.1	4.58	lysS+5222
95530	+	11712.6	AACTGACTTGTAATCAGTAGGTTGGGGGTTCAAGTCCTCTTGCCGGCACCA	-14.9	12.89	lysS+5304
95641	+	927.69	CATCTGACTTTTAATCAGAGGGTCGAAGGTTCGAGTCCTTCATGGCTCACC	-13.8	0	lysS+5415
95732	+	10665.3	TTAGGATCTAGTGTCTTTATGACGTGGGGGTTCAAGTCCCTTCACCCGCAT	-11.5	24.77	lysS+5506
95847	+	11516.8	CCACCTTGCCAAGGTGGGGGTCGCGGGTTCGAATCCCGTCTTCCGCTCCAA	-20.1	10.48	lysS+5621
95921	+	95.88	TGGAATTGGCAGACACACAGGACTTAAAATCCTGCGGTAGGTGACTACCGT	-15.6	0.08	lysS+5695
95950	+	1932.31	TCCTGCGGTAGGTGACTACCGTGCCGGTTCAAGTCCGGCCCTCGGCATTAT	-19.8	22.39	lysS+5724
96033	+	1421	TTTGACTACGGATCAAAAGGTTAGGGGTTCGACTCCTCTCGGGCGCGCCAT	-9.9	10.1	lysS+5807
96130	+	351.38	TAGAGCACATGGTTTGGGACCATGGGGTCGCAGGTTCGAATCCTGTCTTCC	-16.8	0.95	lysS+5904
96222	+	15543	CCTGCTTTGCACGCAGGAGGTCAGCGGTTCGATCCCGCTAGGCTCCACCAA	-19.3	50.17	lysS+5996
96316	+	335.31	TACTAATAAAGTTGCTTTAACAAAGCGGACAAACAAAATGATCTTTGAAAA	-4.7	37.84	lysS+6090
96341	+	46.06	CGGACAAACAAAATGATCTTTGAAAACTAAACAAGACAAAACGTACCTGTT	-0.7	56.85	lysS+6115
96393	+	24.69	ATTCAGTTTTTAAAAATCGCACAGCGATGTGCGTAGTCAGTCAAACTACTT	-10.4	34.55	lysS+6167
98011	+	224	ATATAAGACCTTGGGTCTTATAAACAGAACGTTCCCTGTCTTGTTTAGTTT	-13.6	38.46	lysS+7785
98111	+	23.88	GACATCACATTCAAGTAATACAAGATATCACATAGTGATTCTTTTTAACGG	-5	72.73	lysS+7885
101036	+	15.06	GTGTGGCGACACATGGAGCTGACAGATACTAATCGATCGAGGACTTAACCA	-8.8	100	lysS+10810
101092	-	12.19	TCCGTGTTCGGTATGGGAACGGGTGTGACCTCTTCGCTATCGCCACCAAAC	-11.5	100	gerD+57423
101208	+	24	CGCCGATGGTAGTCGGGGGTTTCCCCCTGTGAGAGTAGGACGCCGCCAAGC	-15.1	100	lysS+10982
103963	+	10.56	TGAAGGAGAAGGTGTTGCTGCGAGAGTTCTGAATAATCTCGGTGTCAGCTT	-9.2	0	clpC_CDS
106057	+	509.81	TAGAAGACGGAAATGAGGCATACAGCATGTAAGTGTATGCCTCACTTTCAT	-20.3	50	clpC+53
106920	+	21.38	GGATCTACAAACGAAATGGGCATTTTCGAAATGCGGGAAGAGGGGCTCACT	-7.4	19.7	radA_CDS
110285	+	115.44	GATTGAACGTTCAAGCTTGTGGGCTGTCCAAACGCCACAAGCTTTTCGTCT	-16.5	15.46	ispD_CDS
111669	+	11.69	CGGAACGCCTACTTATAACTTCGCGGTAGCTATTGATGACTACTTAATGAA	-3.8	7.03	gltX_CDS
112380	+	10.75	TATCAAAGCATCGATCAAAGCAGTGCAGAAAGAAACTGGCCATAAAGGGAA	-4.3	0	gltX_CDS
112758	+	558.75	CCGCGCGGTTAAAGCGTCTCTGTCATGTTTACATGCAGAGACGCTTTTTTT	-23.4	55.75	gltX+260
114967	+	27.81	GGTGATGCCATTTTTGAAGTGTATGTCAGGCATCACCTGCTTAAGCAGGGC	-17.7	0	mrnC_CDS
116252	+	14.25	CTTGAGAAAAAACAGACCAACCATAGAGTTGAAGTAATTTTTACAAAAGAA	-2.8	0	yacP_CDS
117092	+	12.44	TCATTAATCAGGAAGAATTTGATGATATTGAAATGAAAATGGGAGAACTAT	-4.3	0	sigH_CDS
117779	+	121.25	TATAATAGATCATAATATTACTTGCCAAAACCCGTTCAGCGGGTTTTTTAT	-11	0	secE+68
117873	+	49.63	TTGAAGCGTTATGGTAATTCACTAAAACCAAATGCGGGGAGGGAAGGACTG	-7.4	100	secE+162
118574	+	991	AAGAATGAAACCTTGAGTGGGAGGGTTTACCCTATTACCACATCACGGACT	-13.3	0.29	nusG+151
118610	+	221.44	ACCACATCACGGACTTAAGGAGGTGTGTCTCGTGGCTAAAAAAGTAGTTAA	-10.7	0	rplK_CDS
118696	+	119.63	ACCCAGCACCACCAGTTGGACCTGCACTTGGTCAAGCCGGTGTTAACATCA	-14	22.18	rplK_CDS
118752	+	187.38	TTCTGTAAGGAGTTTAACGCTCGTACAGCTGACCAAGCTGGTTTAATCATT	-10.7	2.26	rplK_CDS
118788	+	68.25	GCTGGTTTAATCATTCCTGTTGAAATTTCGGTTTACGAAGACCGTTCATTT	-7.9	0	rplK_CDS
118821	+	51.5	TACGAAGACCGTTCATTTACATTTATTACAAAAACTCCACCTGCTGCAGTA	-0.6	0	rplK_CDS
119014	+	147.63	TGCGCATGGTTGAAGGTACTGCCCGCAGTATGGGTATTGTAATCGAGGATT	-8.7	36.18	rplK_CDS
119065	+	2887.13	AATTTGTTTCTTGTCGGGTTGCGAGTTTTAACAAGTTCGCAACCCTTATTC	-16.7	5.25	rplK+49
119104	+	540.75	CAACCCTTATTCGTGGGAGGTTATTCCGCTATAACCACATAAGGAGGAAAT	-11.2	14.53	rplK+88
119143	+	17.13	TAAGGAGGAAATTTTAAAATGGCTAAAAAAGGTAAAAAGTACGTTGAAGCT	-4.1	0	rplA_CDS
119152	+	10.19	AATTTTAAAATGGCTAAAAAAGGTAAAAAGTACGTTGAAGCTGCTAAGCTT	-7.1	0	rplA_CDS
119165	+	12.44	CTAAAAAAGGTAAAAAGTACGTTGAAGCTGCTAAGCTTGTAGACCGTTCTA	-7.7	0	rplA_CDS
119296	+	19	TTCCGTTTAGGGGTTGACCCTCGTAAAAACGACCAGCAAATCCGTGGAGCA	-10.8	1.95	rplA_CDS
119322	+	34.38	AAACGACCAGCAAATCCGTGGAGCAGTTGTGCTTCCAAACGGAACTGGTAA	-18.3	0	rplA_CDS
119400	+	25.38	AGGCGAAAAAGCGAAAGAAGCTGAAGCTGCTGGTGCAGATTTCGTAGGCGA	-12.2	7.14	rplA_CDS
119422	+	22.88	GAAGCTGCTGGTGCAGATTTCGTAGGCGATACTGACTACATCAACAAAATT	-10.7	2.7	rplA_CDS
119426	+	22.88	CTGCTGGTGCAGATTTCGTAGGCGATACTGACTACATCAACAAAATTCAAC	-8.5	31.71	rplA_CDS
119431	+	22.13	GGTGCAGATTTCGTAGGCGATACTGACTACATCAACAAAATTCAACAAGGC	-4.6	52.13	rplA_CDS
119445	+	17.25	AGGCGATACTGACTACATCAACAAAATTCAACAAGGCTGGTTCGATTTCGA	-1.9	0	rplA_CDS
119566	+	13.75	TTAATGCCGAACCCTAAAACTGGTACAGTTACTTTCGAAGTTGAAAAAGCT	-6.4	0	rplA_CDS
119621	+	91.75	GCGAAATCAAAGCTGGTAAAGTTGAATACCGCGTTGATAAAGCTGGAAACA	-11.8	0	rplA_CDS
119661	+	15.31	AGCTGGAAACATTCATGTTCCTATCGGTAAAGTTTCTTTCGAGGATGAAAA	-4.9	0	rplA_CDS
119664	+	15.63	TGGAAACATTCATGTTCCTATCGGTAAAGTTTCTTTCGAGGATGAAAAACT	-4.9	0	rplA_CDS
119762	+	69.63	CTGCTGCAGCTAAAGGCGTTTACGTGAAAAACGTTGCTGTAACTTCTACTA	-11.4	11.8	rplA_CDS
119781	+	13.69	TTACGTGAAAAACGTTGCTGTAACTTCTACTATGGGACCTGGTGTCAAAGT	-5.8	0	rplA_CDS
119795	+	16	TTGCTGTAACTTCTACTATGGGACCTGGTGTCAAAGTAGACTCTTCAACTT	-9.5	0	rplA_CDS
119811	+	46	TATGGGACCTGGTGTCAAAGTAGACTCTTCAACTTTTAACGTAAAATAATA	-3.8	21.93	rplA+2
119951	+	23.44	ATTATCCTACCGAGGTGTATATTATCACAGCTATTACGTTACGTATGCTTG	-4.2	0	rplA+142
119986	+	10328.2	ACGTTACGTATGCTTGTATATACAGCCTCCATGTCTCATGGAGGCTTTTTA	-18.4	4.24	rplA+177
120036	+	477.06	ATATGGAATCCGTCGTCTCAGTCGTGATCACCTAACGGTATAAGTGTTACA	-5.2	1.3	rplA+227
120086	+	189.63	ACAAGAATCTACAGGAGGTGTAACCATGAGCAGCGCAATTGAAACAAAAAA	-2.4	0	rplJ_CDS
120109	+	43.44	CCATGAGCAGCGCAATTGAAACAAAAAAAGTTGTTGTTGAAGAAATTGCTT	-6.9	0	rplJ_CDS
120112	+	43.81	TGAGCAGCGCAATTGAAACAAAAAAAGTTGTTGTTGAAGAAATTGCTTCTA	-8.8	0	rplJ_CDS
120156	+	16.94	GCTTCTAAACTGAAAGAAAGTAAATCAACGATCATCGTTGACTATCGCGGA	-8.6	13	rplJ_CDS
120228	+	37.88	GAACTTCGTAAACAGCTTCGCGAAGCTAACGTTGAGTTCAAAGTTTACAAA	-9.8	0	rplJ_CDS
120269	+	31.19	AGTTTACAAAAATACGATGACTCGCCGTGCGGTTGAACAAGCTGAGCTTAA	-5.9	7.06	rplJ_CDS
120316	+	43.31	TTAATGGTTTGAATGATTTCTTAACTGGACCGAACGCGATCGCATTCAGCA	-5.7	12.22	rplJ_CDS
120384	+	37.13	CCGGCTAAAGTTCTTAATGACTTCGCTAAAAATCACGAAGCTCTTGAAATC	-5.3	0	rplJ_CDS
120405	+	46.19	TTCGCTAAAAATCACGAAGCTCTTGAAATCAAAGCTGGCGTTATCGAAGGT	-7	18.91	rplJ_CDS
120473	+	22.38	AGAAGTGAAAGCTCTTGCTGAACTTCCATCACGCGAAGGCTTGCTTTCTAT	-13.1	0	rplJ_CDS
120524	+	43.88	GTTGCTTAGCGTACTTCAAGCTCCAGTTCGCAACCTTGCTCTTGCTGCAAA	-9.3	0	rplJ_CDS
120585	+	90.94	GAACAAAAGGAAGAACAAGGCGCTTAATCTAATCAGTTTTTCATAAATTAA	-4.3	0	rplJ+24
120588	+	91.19	CAAAAGGAAGAACAAGGCGCTTAATCTAATCAGTTTTTCATAAATTAAAAC	-4.3	1.63	rplJ+27
120663	+	20.75	TTAAATATCGAAGAAATCATTGCTTCCGTTAAAGAAGCAACTGTACTTGAA	-7.7	10.45	rplL_CDS
120816	+	29.06	CAAAGCGAATTCGATCTTATCCTTGCTGGTGCAGGATCTCAAAAAATCAAA	-7.5	0.4	rplL_CDS
121030	+	22411.5	CTTCACTTACCTGTAGGGGAAGCTCGCTTTTATGAGGCGAGCTTTTTCTTT	-20.7	71.55	rplL+52
121660	+	12.5	CGATGAAGTTTCCGTCGTTCAAAAAAAGAAAGGCTATTATATCATAAAAGC	-5	19.56	ybxB_CDS
121689	+	11.56	AAGGCTATTATATCATAAAAGCAAAAAAAGTTTGACTCGGTATTTTAACTA	-4	1.39	ybxB+16
121964	+	21.31	ATCAGTTGACAGGTCAACTAGTTCAGTATGGACGACACCGCCAGCGCAGAA	-9.8	16.1	rpoB_CDS
122212	+	16.75	AAAGAACGTGATGTGACTTACTCAGCTCCGCTAAGAGTGAAGGTTCGTTTA	-9.2	0	rpoB_CDS
122219	+	18	GTGATGTGACTTACTCAGCTCCGCTAAGAGTGAAGGTTCGTTTAATTAACA	-8.5	0	rpoB_CDS
122248	+	15.81	GTGAAGGTTCGTTTAATTAACAAAGAAACTGGAGAGGTAAAAGACCAAGAT	-3.6	0	rpoB_CDS
122270	+	13.44	AAGAAACTGGAGAGGTAAAAGACCAAGATGTCTTCATGGGTGATTTCCCTA	-11.1	0	rpoB_CDS
122508	+	27.06	TTATGTCCGCATTGATCGCACACGTAAGTTGCCGGTTACGGTTCTTTTGCG	-11	0	rpoB_CDS
122860	+	20.69	GAAACAGGAGAAATCCTTGCTGAAAAAGGCCAGATTCTTGATAGAAGAACG	-9.1	0	rpoB_CDS
122893	+	10.69	ATTCTTGATAGAAGAACGCTTGATAAAGTACTGCCATACTTAGAAAACGGA	-5.5	6.85	rpoB_CDS
122939	+	15.88	ACGGAATCGGTTTTAGAAAGCTGTATCCGAATGGCGGCGTTGTTGAAGATG	-10.7	0.92	rpoB_CDS
122951	+	10.75	TTAGAAAGCTGTATCCGAATGGCGGCGTTGTTGAAGATGAAGTGACTCTTC	-7	0	rpoB_CDS
122962	+	18.13	TATCCGAATGGCGGCGTTGTTGAAGATGAAGTGACTCTTCAATCAATTAAA	-11.1	0	rpoB_CDS
123171	+	820.5	CGATCATCTTGGAAACCGCCGTTTACGTTCTGTAGGCGAGCTTCTCCAGAA	-14	8.86	rpoB_CDS
123195	+	16.19	ACGTTCTGTAGGCGAGCTTCTCCAGAACCAATTCCGTATCGGTTTAAGCCG	-10.9	0	rpoB_CDS
123203	+	18	TAGGCGAGCTTCTCCAGAACCAATTCCGTATCGGTTTAAGCCGTATGGAGC	-13.2	0	rpoB_CDS
123274	+	13.44	TCAATTCAAGATACGAATACAATTACGCCTCAGCAGCTGATCAATATTCGT	-6.1	5.39	rpoB_CDS
123283	+	13.75	GATACGAATACAATTACGCCTCAGCAGCTGATCAATATTCGTCCTGTTATT	-6.4	34.36	rpoB_CDS
123430	+	15.44	GCATTAGGACCGGGCGGATTGACACGTGAGCGTGCCGGAATGGAAGTGCGT	-11.8	3.02	rpoB_CDS
123626	+	14.75	AAACAGGGAAGGTAACGGGCAGAATCGATTACTTAACTGCTGATGAAGAGG	-8.4	0	rpoB_CDS
123655	+	16.5	TACTTAACTGCTGATGAAGAGGATAACTATGTTGTCGCTCAAGCGAATGCT	-11.1	1.11	rpoB_CDS
123888	+	18.63	AGCGAACATGCAGCGTCAGGCTGTGCCTTTGATGCAGCCGGAAGCGCCATT	-15.9	0	rpoB_CDS
123944	+	24.81	GAACTGGTATGGAATACGTATCAGGAAAAGACTCTGGTGCCGCTGTTATTT	-10.5	0	rpoB_CDS
124229	+	37.94	CACTTGGCCGTAACGTAATGGTCGGCTTCATGACGTGGGATGGCTACAACT	-14.3	0.56	rpoB_CDS
124573	+	19.88	GCCCGCGAGGTTCGTGATACTTCTCTTCGTGTGCCTCATGGCGGCGGCGGA	-17	5.05	rpoB_CDS
124641	+	15.19	AGTCTTCAACCGTGAAGACGGAGACGAACTTCCTCCAGGTGTTAACCAGTT	-15.2	10.18	rpoB_CDS
124777	+	36.06	AAGATTCTTCCTGAAGAGGATATGCCTTACCTTCCTGACGGCACACCAATT	-8.6	0	rpoB_CDS
124838	+	15.5	TTAACCCGCTGGGCGTACCATCACGTATGAACATCGGGCAGGTATTGGAAC	-14.9	0	rpoB_CDS
124867	+	41.88	AACATCGGGCAGGTATTGGAACTTCACATGGGTATGGCCGCTCGTTACCTT	-9.3	10.8	rpoB_CDS
125052	+	60.31	CCGTGTATCTGTCGGTATCATGTACATGATCAAACTGGCTCACATGGTTGA	-14.6	0	rpoB_CDS
125201	+	44.38	TGGAGGTTTGGGCACTTGAAGCTTACGGTGCGGCTTACACTCTTCAAGAAA	-9.6	8.94	rpoB_CDS
125306	+	18.5	TCGTTAAAGGCGACAATGTTCCTGAACCAGGTGTTCCGGAATCATTCAAAG	-12.9	0	rpoB_CDS
125377	+	26.19	AGCTTAGGTATGGATGTCAAAATCCTTTCTGGTGATGAAGAAGAAATAGAA	-7.2	1.76	rpoB_CDS
125491	+	20.94	GAAGAGCCGGAAGAAACAGCATCTGCAGACGTTGAACGCGATGTAGTAACA	-6.3	2.51	rpoB_CDS
125583	+	12.88	ATCCGAAGATAAAAAGGGAGGTAGGCCCCTTGCTAGATGTGAACAATTTTG	-6.3	0	rpoC_CDS
125657	+	10.38	TCACCAGATAAAATCCGTTCATGGTCTTTTGGTGAAGTGAAAAAGCCTGAA	-10.4	0	rpoC_CDS
125678	+	10.44	TGGTCTTTTGGTGAAGTGAAAAAGCCTGAAACGATAAACTATCGTACGTTA	-7.9	0	rpoC_CDS
125844	+	41.81	GCGGAGTCGAAGTAACACGGGCTAAAGTCCGTCGTGAGAGAATGGGGCACA	-11	19.97	rpoC_CDS
125872	+	2208.38	CCGTCGTGAGAGAATGGGGCACATTGAACTGGCTGCCCCAGTTTCCCACAT	-19.3	0	rpoC_CDS
126002	+	14.38	TTTGCTTCTTACGTTGTAACTGATCCGGCGAATACACCGCTTGAAAAGAAA	-7.1	17.48	rpoC_CDS
126259	+	13.38	CCGTAACTCAGGAAACAAGCCTTCTTGGATGATCCTTGATGTGCTTCCTGT	-11.1	0	rpoC_CDS
126414	+	24.44	TGAAACGCCTTTTGGACCTTGGTGCGCCTAGCATCATCGTTCAAAACGAAA	-16	0	rpoC_CDS
126657	+	23.88	ATTTGAAAATGTACCAATGCGGATTACCGAAGGAAATGGCACTTGAACTTT	-4.1	0	rpoC_CDS
126806	+	21.75	GATGTACTAGAATCAGTTATTAAGGAGCATCCGGTACTGCTGAACCGTGCC	-9.6	0	rpoC_CDS
126809	+	21.31	GTACTAGAATCAGTTATTAAGGAGCATCCGGTACTGCTGAACCGTGCCCCT	-10	0	rpoC_CDS
127045	+	10.38	CATCTTGAACCCTAAAGATGGTAAACCGGTTGTAACACCGTCTCAGGATAT	-9.9	1.12	rpoC_CDS
127094	+	15.69	ATGGTACTAGGTAACTATTACCTGACACTTGAGCGTGCCGGTGCTGTCGGT	-11.7	0	rpoC_CDS
127236	+	10.31	ACTCACTTAAGAATGTGACATTTACCGAAGAACAGCGCTCAAAATTGTTAA	-3.6	0	rpoC_CDS
127342	+	31.5	CATGAATGAACCAACGAAGAGCAACATTGAAGAGAAAACACCTGACCGTTT	0	1.21	rpoC_CDS
127347	+	30.88	ATGAACCAACGAAGAGCAACATTGAAGAGAAAACACCTGACCGTTTCTTCT	-4.4	0	rpoC_CDS
127407	+	50.38	GTGCTGATGTTAAAGCTGTTATCGCACAGCAGCCAATCAATGCGCCGTTTA	-12	3.22	rpoC_CDS
127663	+	17.88	GAAGCAATTCCGCCGCGGTCTTATCACTGAAGAAGAACGCTATGAGAGAGT	-7.5	0	rpoC_CDS
127806	+	13.94	CTGGTGCCCGTGGTAACGCATCTAACTTTACGCAGCTTGCCGGAATGCGCG	-12	1.46	rpoC_CDS
127830	+	15.75	ACTTTACGCAGCTTGCCGGAATGCGCGGCCTGATGGCCAACCCGGCTGGAC	-16.3	0	rpoC_CDS
128213	+	18.81	ATCGATGAAGATAAAGCACTGGAGATTGTCGAAGCCGGCATTGAAGAAGTG	-8.4	0	rpoC_CDS
128412	+	13.94	TAACAATGCGTACATTCCATACAGGCGGGGTTGCCGGAGACGATATCACAC	-7	9.1	rpoC_CDS
128591	+	10.19	CAAGGCGCAGTGGAAACACGTTCTTATACGGCACCTTACAACTCCCGCCTG	-9.8	0	rpoC_CDS
128887	+	13.31	ATTGCTTGATATTCACCAATTTACTGAAGCGAACAAAAAGGTATTGCTTGA	-5.1	0	rpoC_CDS
128904	+	17	AATTTACTGAAGCGAACAAAAAGGTATTGCTTGAAGGCAACCGACCAGCTA	-6.6	19.83	rpoC_CDS
129118	+	21.06	GCTTGTTCCAGCAGGTACAGGAATGATGAAATACCGTAAAGTAAAACCAGT	-6.3	11.98	rpoC_CDS
129158	+	327.19	GTAAAACCAGTATCAAATGTTCAGCCGACTGACGATATGGTCCCGGTTGAA	-13.4	98.75	rpoC_CDS
129212	+	47.81	CTGATTTAACTCTGCTGAAAGACTGCAAAAACAGTCTTTCAGCAGATATAT	-25.3	51.56	rpoC+51
129371	+	10.56	TACTTTGGAGGATATGTTTATGTCTTATGATAAAGTATCACAGGCCAAATC	-8.4	0	ybxF_CDS
129578	+	675.88	AAAGCTCGGCAAAGCCTGCGGAATTGAGGTAGGAGCAGCCGCTGTTGCCAT	-16.1	0.72	ybxF_CDS
129639	+	972.63	CGTACTTTTGTTTTTGCGTAAGATTCCATCTTGTGTAAAGACATTGTTTTT	-13.5	0	ybxF+51
129680	+	56.38	CATTGTTTTTTGCCTTTTGATGAACCACCTGGGTATGTGGGTTATAAAACG	-7.5	0	ybxF+92
129712	+	40.5	GTATGTGGGTTATAAAACGTAATGAAGGGAGGAAAAATTCATGCCTACAAT	-8.6	0	rpsL_CDS
129735	+	12.31	GAAGGGAGGAAAAATTCATGCCTACAATTAATCAGCTAATTCGCAAAGGAC	-4.2	0	rpsL_CDS
129738	+	11.56	GGGAGGAAAAATTCATGCCTACAATTAATCAGCTAATTCGCAAAGGACGCG	-4.2	0	rpsL_CDS
129836	+	39.25	AACAGCTTTAAAAAAGAGCACACTAACGTATCTTCTCCACAAAAACGCGGG	-3.9	7.6	rpsL_CDS
129848	+	38.63	AAAGAGCACACTAACGTATCTTCTCCACAAAAACGCGGGGTATGTACTCGT	-6.1	0	rpsL_CDS
129850	+	38.69	AGAGCACACTAACGTATCTTCTCCACAAAAACGCGGGGTATGTACTCGTGT	-8.6	0	rpsL_CDS
129888	+	71.19	TATGTACTCGTGTTGGTACAATGACACCGAAAAAACCGAACTCAGCACTTC	-6.2	10.63	rpsL_CDS
130112	+	58.31	GAAAACCGTGCACAAGGCCGTTCTAAATACGGTACGAAAAAACCTAAAGCA	-6.3	7.43	rpsL_CDS
130114	+	58.69	AAACCGTGCACAAGGCCGTTCTAAATACGGTACGAAAAAACCTAAAGCAAA	-6.4	7.56	rpsL_CDS
130128	+	38.75	GCCGTTCTAAATACGGTACGAAAAAACCTAAAGCAAAATAATATACGAAAA	-5.5	10.24	rpsL+10
130191	+	14.5	ATGAAGGGAGGATATTCAGATGCCACGTAAAGGTCCTGTAGCAAAAAGAGA	-3.8	0	rpsG_CDS
130217	+	29.56	GTAAAGGTCCTGTAGCAAAAAGAGATGTTTTACCTGATCCGATTTACAACT	-6.3	0	rpsG_CDS
130338	+	12.63	ATACAAGTCATTCGATATCATTAAAGAACGTACTGGCAATGATGCAATGGA	-5.7	7.98	rpsG_CDS
130344	+	15.19	GTCATTCGATATCATTAAAGAACGTACTGGCAATGATGCAATGGAGGTTTT	-5.7	9.08	rpsG_CDS
130384	+	11.38	ATGGAGGTTTTCGAACAAGCATTGAAAAACATCATGCCTGTACTTGAAGTA	-8.6	0	rpsG_CDS
130428	+	11.19	TGAAGTAAAAGCACGCCGTGTAGGTGGTGCGAACTACCAAGTTCCTGTAGA	-13	0	rpsG_CDS
130494	+	46.19	TCGTACGACTCTTGGACTTCGCTGGTTAGTTAACTACGCTCGTCTTCGTGG	-10	0	rpsG_CDS
130598	+	15.75	ACACTGGTGCTGCTGTTAAGAAACGTGAAGACACTCATAAGATGGCTGAAG	-4.8	12.33	rpsG_CDS
130650	+	55.19	AAACAAAGCATTTGCTCACTATCGCTGGTAGGATTTATAGATTAACAAAAC	-4.1	9.23	rpsG+20
130758	+	121	AAAACTCGTAATATCGGTATCATGGCTCACATCGATGCCGGTAAAACGACT	-19.6	0	fusA_CDS
130870	+	19.31	GAGCTTCACAAATGGACTGGATGGAGCAGGAACAAGAACGTGGTATCACAA	-7.3	0.72	fusA_CDS
130915	+	39	TCACAATCACTTCCGCTGCGACTACTGCACAGTGGAAAGGATACCGCGTAA	-12.3	0	fusA_CDS
130948	+	13.5	GGAAAGGATACCGCGTAAACATCATCGATACTCCAGGACACGTAGACTTCA	-4.2	0	fusA_CDS
131061	+	21.13	TCAGGCGTTGAGCCTCAAACAGAAACTGTTTGGCGTCAGGCAACAACTTAT	-14	7.48	fusA_CDS
131092	+	59.88	GGCGTCAGGCAACAACTTATGGAGTACCGCGTATCGTTTTTGTTAACAAAA	-6.3	9.94	fusA_CDS
131128	+	10.94	TTTTTGTTAACAAAATGGACAAAATCGGTGCAGACTTCCTTTACTCTGTAG	-6.9	0	fusA_CDS
131135	+	11.06	TAACAAAATGGACAAAATCGGTGCAGACTTCCTTTACTCTGTAGGAACTTT	-4.9	2.43	fusA_CDS
131324	+	17.75	AGAAATCCCTGAAGAGTACAAAGAGCAAGCTGAAGAGCTTCGCAACAGCCT	-7.8	8.81	fusA_CDS
131358	+	10.5	GAGCTTCGCAACAGCCTTATTGAAGCTGTATGTGAGCTTGATGAAGAGCTT	-16.4	0	fusA_CDS
131388	+	57.38	TGTGAGCTTGATGAAGAGCTTATGGATAAGTACCTTGAGGGTGAAGAAATC	-13	0.67	fusA_CDS
131563	+	52.38	ACCTTCCTGCACCAACTGACGTTGCTGCAATCAAAGGTACACGTCCTGATA	-11.5	18.05	fusA_CDS
131600	+	14.06	TACACGTCCTGATACAAATGAAGAGATTGAGCGTCATTCTTCTGACGAAGA	-6.5	2.98	fusA_CDS
131624	+	47.56	GATTGAGCGTCATTCTTCTGACGAAGAGCCATTCTCTGCATTAGCATTTAA	-9.4	0	fusA_CDS
131752	+	21.63	TGAAAAACTCTACTAAAGGCAAACGTGAGCGTGTTGGACGTATTCTTCAAA	-3.6	0	fusA_CDS
131825	+	23.13	AATCTCTACTGTATACGCAGGGGATATCGCAGCTGCTGTAGGTCTAAAAGA	-8.5	14.12	fusA_CDS
132027	+	145.06	GAAGATCCTACATTCCGTACTCAAACAAACCCAGAAACTGGCCAAACGATC	-3.5	7.19	fusA_CDS
132085	+	46.31	GTATGGGTGAACTTCACCTTGATATCATTGTTGACCGTATGAAACGCGAAT	-8.7	13.5	fusA_CDS
132101	+	62.25	CCTTGATATCATTGTTGACCGTATGAAACGCGAATTTAAAGTAGAAGCCAA	-2.7	9.93	fusA_CDS
132197	+	22.94	TGCAAAAGTTGAAGGTAAATTCGTACGTCAGTCTGGTGGACGCGGTCAGTT	-5.8	15.28	fusA_CDS
132202	+	22.63	AAGTTGAAGGTAAATTCGTACGTCAGTCTGGTGGACGCGGTCAGTTCGGAC	-9.2	9.66	fusA_CDS
132256	+	46.25	TTTGGATCGAATTCGAACCAAACGAAGAAGGCGCTGGCTTTGAATTTGAAA	-12.8	7.39	fusA_CDS
132373	+	59	CACTCGAAAATGGTGTACTAGCAGGCTTCCCGCTTATCGACATTAAAGCTA	-6.9	0.06	fusA_CDS
132746	+	11.81	GGATCACTACGAAGAAGTGCCGAAGAGCGTCGCAGAAGAAATTATCAAAAA	-3.5	0	fusA_CDS
132795	+	39.81	AAAAATAAAGGCGAATAATTGATTTTGCCGCTTAACTCAAGTATAACTACT	-7.8	0	fusA+33
132840	+	1362.38	ACTACTATTGTAAGATGAGGAAGTGAAAGCTTTCTTTCACTTCCTATCACT	-20.5	0	fusA+78
132961	+	29.13	ATCACATGCCAATATTGGTACAATTGGACACGTTGACCATGGTAAAACAAC	-10.1	0	tufA_CDS
133101	+	19.69	AACGCGAGCGCGGTATCACAATCTCTACTGCACACGTTGAGTACGAAACTG	-7.7	0	tufA_CDS
133257	+	35.19	CTGCTGATGGCCCAATGCCACAAACTCGTGAGCACATCCTTCTTTCTAAAA	-7.3	8.34	tufA_CDS
133288	+	32.31	GCACATCCTTCTTTCTAAAAACGTTGGTGTACCATACATCGTTGTATTCTT	-6.9	0	tufA_CDS
133334	+	32.56	TTCTTAAACAAATGCGACATGGTAGACGACGAAGAGCTTCTTGAACTAGTT	-4	1.51	tufA_CDS
133352	+	15.31	ATGGTAGACGACGAAGAGCTTCTTGAACTAGTTGAAATGGAAGTTCGCGAT	-8.8	0	tufA_CDS
133459	+	37.94	TCTTAAAGCTCTTGAAGGAGACGCTGAGTGGGAAGCTAAAATCTTCGAACT	-10.9	0	tufA_CDS
133606	+	32.75	TGGTACAGTTGCTACTGGCCGTGTAGAACGCGGACAAGTTAAAGTCGGTGA	-13.9	17.3	tufA_CDS
133608	+	33.25	GTACAGTTGCTACTGGCCGTGTAGAACGCGGACAAGTTAAAGTCGGTGACG	-12.4	17.12	tufA_CDS
133639	+	30.06	ACAAGTTAAAGTCGGTGACGAAGTTGAAATCATCGGTCTTCAAGAAGAGAA	-7.4	15.4	tufA_CDS
133641	+	29.88	AAGTTAAAGTCGGTGACGAAGTTGAAATCATCGGTCTTCAAGAAGAGAACA	-7.4	13.05	tufA_CDS
133646	+	31.06	AAAGTCGGTGACGAAGTTGAAATCATCGGTCTTCAAGAAGAGAACAAGAAA	-7.4	0	tufA_CDS
133802	+	22.81	CGTGGTCAAGTACTTGCTAAACCAGGTACAATCACTCCACACAGCAAATTC	-11.4	0	tufA_CDS
133895	+	99	CATACTCCATTCTTCTCTAACTACCGTCCTCAGTTCTACTTCCGTACAACT	-2.4	0	tufA_CDS
133917	+	52.31	ACCGTCCTCAGTTCTACTTCCGTACAACTGACGTAACTGGTATCATCCATC	-9.2	2.86	tufA_CDS
133925	+	53.63	CAGTTCTACTTCCGTACAACTGACGTAACTGGTATCATCCATCTTCCAGAA	-9.2	4.12	tufA_CDS
133956	+	26.5	GTATCATCCATCTTCCAGAAGGCGTAGAAATGGTTATGCCTGGAGATAACA	-13	1.42	tufA_CDS
134078	+	79.06	GGACGTACTGTTGGTTCAGGCGTTGTTTCTACAATCACTGAGTAATAGTAT	-16.3	25.79	tufA+6
134080	+	78.5	ACGTACTGTTGGTTCAGGCGTTGTTTCTACAATCACTGAGTAATAGTATGG	-19.5	24.65	tufA+8
134084	+	80.63	ACTGTTGGTTCAGGCGTTGTTTCTACAATCACTGAGTAATAGTATGGTTTT	-14	17	tufA+12
134114	+	23230.6	ACTGAGTAATAGTATGGTTTTAAACGAGACCCCTGTGGGTCTCGTTTTTTG	-17.3	88.03	tufA+42
134141	+	39.19	GACCCCTGTGGGTCTCGTTTTTTGTTTGCTTATCTTTTTCTTGTATAATAG	-7.6	3.36	tufA+69
135140	+	107.38	CGAACACATTAAGTCGGCATGCACGACACCATTTATGATAGATCCTTGATA	-5.2	6.24	ybaC+13
135321	+	1274.81	CTGACACACCCGGCCGCTTTGCCATGGCAAGGTGTTCAGGTTTTTCTCACG	-17.3	0	ybaC+194
135357	+	358.13	CAGGTTTTTCTCACGGAGAACTGTCTAACGTGATGTAGGCGAAAAGGAGGG	-9.6	34.49	ybaC+230
135378	+	224.06	TGTCTAACGTGATGTAGGCGAAAAGGAGGGAAAATAATGGCAAAACAAAAA	-3.9	0	rpsJ_CDS
135496	+	16.13	CGGCAAAACGTTCTGGTGCCAGCGTATCTGGTCCGATTCCGTTGCCAACTG	-15.7	0	rpsJ_CDS
135552	+	78.81	TCAGTTTACACAATCCTTCGTGCGGTGCACAAATACAAAGATTCTCGTGAG	-4	0	rpsJ_CDS
135556	+	79.69	TTTACACAATCCTTCGTGCGGTGCACAAATACAAAGATTCTCGTGAGCAAT	-4	0	rpsJ_CDS
135614	+	24.63	GCGTACACATAAACGTTTAATCGACATTGTGAACCCAACACCACAAACTGT	-4.7	0.02	rpsJ_CDS
135617	+	24.44	TACACATAAACGTTTAATCGACATTGTGAACCCAACACCACAAACTGTTGA	-7.7	0.01	rpsJ_CDS
135654	+	34.06	CCACAAACTGTTGATGCTCTTATGCGATTAGACTTACCATCTGGTGTCGAT	-6.7	0	rpsJ_CDS
135671	+	26.88	TCTTATGCGATTAGACTTACCATCTGGTGTCGATATCGAAATTAAACTTTA	-8	0	rpsJ_CDS
135744	+	26.25	TAATAGGAGGTGTGACGAATGACCAAAGGAATCTTAGGAAGAAAAATTGGT	-3.5	12.07	rplC_CDS
136102	+	24.56	CTAAAGGTAAAGGTTTCCAAGGTGCGATCAAGCGCCACGGACAATCTCGCG	-15.1	8.17	rplC_CDS
136302	+	27.25	GCAGAACGCAATCTTCTTTTGATCAAAGGTAACGTACCTGGTGCGAAGAAA	-10.4	12.38	rplC_CDS
136348	+	16.56	AGAAATCTTTAATCACTGTTAAAAGTGCTGTTAAATCTAAATAATTCTCTT	-4.9	0.33	rplC+7
136359	+	18.13	ATCACTGTTAAAAGTGCTGTTAAATCTAAATAATTCTCTTAGGAAAGGAGG	-6.7	31.26	rplC+18
136369	+	21.56	AAAGTGCTGTTAAATCTAAATAATTCTCTTAGGAAAGGAGGAAATTGATTA	-5.2	19.98	rplD_CDS
136478	+	31.31	CGCTTCTGTATTTGGTATCGAACCAAATGAGAGTGTTGTATTCGACGCTAT	-14.7	0	rplD_CDS
136531	+	15.81	TTATGCAAAGAGCTTCCTTACGTCAAGGAACTCACAAAGTAAAAAATCGTT	-8.8	0	rplD_CDS
136669	+	57.25	GCGGAGGTGGTGTCGTATTCGGCCCAACACCACGCAGCTATTCTTATAAAT	-14.5	14.2	rplD_CDS
136992	+	67.13	CTTCTGATTACAAAAGCAGCGGTTGAAAAAGTAGAGGAGGTGCTTGCATAA	-6.7	0	rplW_CDS
137044	+	23.5	GAAAGATCCTCGTGATGTTCTAAAGCGCCCCGTCATTACTGAACGTTCTGC	-4.9	14.66	rplW_CDS
137053	+	19.88	TCGTGATGTTCTAAAGCGCCCCGTCATTACTGAACGTTCTGCCGATTTAAT	-5.6	18.21	rplW_CDS
137066	+	24.63	AAGCGCCCCGTCATTACTGAACGTTCTGCCGATTTAATGACTGAAAAAAAA	-5.7	0	rplW_CDS
137202	+	19.38	TCAACATCATGAACTACAAAGGCAAATCAAAACGTGTTGGACGCTACACTG	-3.8	0	rplW_CDS
137266	+	54	TCGCAGAAAAGCGATCGTAAAACTTACTGCAGACAGCAAAGAAATCGAAAT	-8.3	0	rplW_CDS
137287	+	52.06	ACTTACTGCAGACAGCAAAGAAATCGAAATTTTTGAAGCTTAATTATCTGT	-5	0	rplW+8
137430	+	12.25	ATCACGACTGACAAGCCGGAAAAATCCTTGCTTGCTCCCCTTCACAAAAAA	-8.2	0	rplB_CDS
137455	+	16.5	CCTTGCTTGCTCCCCTTCACAAAAAAGGCGGACGTAACAACCAAGGTAAAT	-12.9	0	rplB_CDS
137491	+	60.63	ACAACCAAGGTAAATTGACTGTACGTCACCAAGGTGGCGGACATAAACGCC	-13.3	10.89	rplB_CDS
137517	+	75.5	CACCAAGGTGGCGGACATAAACGCCAATACCGTGTTATCGACTTCAAACGC	-11.3	0	rplB_CDS
137566	+	11.88	GCGATAAAGATGGTATACCTGGACGCGTTGCTACAGTTGAATACGATCCAA	-7.4	7.32	rplB_CDS
137597	+	46.31	TACAGTTGAATACGATCCAAACCGTTCAGCTAACATCGCTCTAATCAACTA	-6.8	17.47	rplB_CDS
137639	+	15.81	AATCAACTATGCAGACGGAGAAAAACGTTACATTCTTGCTCCTAAAGGAAT	-8.2	6.46	rplB_CDS
137776	+	16	CAGTTGTGCATAACATTGAATTAAAACCTGGTAAAGGCGGACAGCTTGTAC	-7.2	0	rplB_CDS
137816	+	16.56	ACAGCTTGTACGTTCAGCTGGTACATCTGCTCAGGTTCTTGGTAAAGAAGG	-9.4	9.71	rplB_CDS
138188	+	5865.31	TAAATAACGGGGTTGTCTACGGTTCTTTTCGGACCGTAGTGCAATCACGAA	-21.1	27.96	rplB+44
138245	+	90.44	TTCCAAAATGGCTCGCAGCTTAAAAAAAGGACCATTTGTCGATGGACACTT	-8.6	1.74	rpsS_CDS
138267	+	32	AAAAAAGGACCATTTGTCGATGGACACTTGATGACTAAAATCGAGAAATTA	-9.2	0	rpsS_CDS
138307	+	20.63	TCGAGAAATTAAATGAAACAGACAAGAAACAAGTCGTAAAAACTTGGTCTC	-4.3	0	rpsS_CDS
138506	+	16.88	TGATGACAAAAAAACAAGACGCTAAGAGAGGAGGCTTTTAAATGCAAGCTA	-4.2	0	rplV_CDS
138636	+	175.5	TGAGGCAGTATCAATCTTGAACCTTACACCAAGAGCTGCTTCTCCAATTAT	-13.9	11.48	rplV_CDS
138663	+	30.56	ACCAAGAGCTGCTTCTCCAATTATCGAGAAAGTATTAAAATCCGCTATTGC	-7.8	1.55	rplV_CDS
138667	+	29.81	AGAGCTGCTTCTCCAATTATCGAGAAAGTATTAAAATCCGCTATTGCAAAT	-7.7	5.56	rplV_CDS
138670	+	29.25	GCTGCTTCTCCAATTATCGAGAAAGTATTAAAATCCGCTATTGCAAATGCT	-7.7	7.18	rplV_CDS
138677	+	32.63	CTCCAATTATCGAGAAAGTATTAAAATCCGCTATTGCAAATGCTGAGCATA	-5.2	0	rplV_CDS
138681	+	35	AATTATCGAGAAAGTATTAAAATCCGCTATTGCAAATGCTGAGCATAACTA	-4	0	rplV_CDS
138835	+	19.63	AACAAACGTACGAGCCACATTACAATCGTTGTATCAGAAAAGAAGGAGGGA	-3.3	7.49	rplV_CDS
138951	+	32.44	TAAGTGGTACGCTGGTAAAGATTACGCTGACTTCCTGCACGAAGATTTAAA	-5.7	0.85	rpsC_CDS
139107	+	11.19	TGGTATGGTTATCGGTAAAGGCGGTTCTGAAGTCGAAGCACTTCGCAAAGC	-5.9	0	rpsC_CDS
139150	+	35.75	CGCAAAGCCCTTAACAGCCTTACTGGCAAGCGTGTACACATTAACATTCTT	-7.9	0	rpsC_CDS
139333	+	25.31	GTGAAAACAATGGTTTCTGGTCGTCTTGGCGGTGCAGATATCGCTCGTTCT	-9.4	3.62	rpsC_CDS
139438	+	16.06	TATGCAACATCTGAAGCTGATACTACTTACGGTAAGCTTGGTGTAAAAGTC	-9.6	0	rpsC_CDS
139479	+	10.13	TGTAAAAGTCTGGATCTATCGTGGAGAGGTTCTTCCTACTAAGAAGAAAAA	-5.7	3.86	rpsC_CDS
139505	+	32	AGGTTCTTCCTACTAAGAAGAAAAATGAGGAAGGAGGAAAATAATATGTTA	-8.6	2.16	rplP_CDS
139669	+	72.38	TTGGATTACTAACCGTCAAATCGAAGCTGCACGTATTGCGATGACTCGTTA	-4.7	0	rplP_CDS
139701	+	10.31	GTATTGCGATGACTCGTTACATGAAACGTGGCGGTAAAGTTTGGATCAAAA	-9.8	0	rplP_CDS
139772	+	10.44	ACTGCTAAACCACTTGAGGTACGTATGGGATCCGGTAAAGGGGCTCCAGAA	-9.4	1.18	rplP_CDS
139903	+	19.81	TCGCCTTGCATCTCACAAATTGCCAATTAAAACGAAGTTCGTAAAACGTGA	-4.2	10.8	rplP_CDS
139934	+	16.94	ACGAAGTTCGTAAAACGTGAAGAAATTGGTGGTGAATCAAATGAAAGCTAA	-3.3	4.89	rpmC_CDS
139965	+	52.44	GTGAATCAAATGAAAGCTAATGAAATTCGTGACCTTACCACTGCTGAAATT	-1.7	21.45	rpmC_CDS
140066	+	10.75	ATTAGCGACAGGACAACTTGAAAATACTGCTCGCATTCGTGAAGTGCGCAA	-9.3	0	rpmC_CDS
140125	+	24.06	CGCGCATGAAAACTGTGATTCGTGAAAGAGAAATTGCTGCTAATAAATAAT	-4.3	2.34	rpmC+1
140206	+	23.06	CGTAACCAACGCAAAGTTTACCAAGGCCGTGTTGTTTCTGACAAAATGGAT	-6.5	0	rpsQ_CDS
140234	+	15.94	GTGTTGTTTCTGACAAAATGGATAAAACCATTACTGTTGTTGTTGAGACAT	-10.9	0.73	rpsQ_CDS
140242	+	19.13	TCTGACAAAATGGATAAAACCATTACTGTTGTTGTTGAGACATACAAAAAA	-7.9	0.15	rpsQ_CDS
140282	+	56	CATACAAAAAACATACACTTTACGGTAAACGCGTAAAATACTCAAAAAAAT	-4.4	0.33	rpsQ_CDS
140438	+	17.38	TCGAAGAAGCTGTTATTATCTAATAAAGTTCGGAATTCTTTTTCCGAAGGG	-8.9	26.89	rpsQ+28
140483	+	22.19	GAAGGGAGGTAACAAATAATGATTCAACAAGAGACTCGTTTAAAAGTAGCT	-4.1	0.76	rplN_CDS
140513	+	17.69	GAGACTCGTTTAAAAGTAGCTGACAACTCTGGCGCACGTGAAGTACTTACT	-2.9	0	rplN_CDS
140572	+	49.44	TCTTGGTGGTTCTGGACGTAAAACAGCTAACATTGGTGATGTAATTGTTTG	-4.4	0	rplN_CDS
140611	+	21	TGTAATTGTTTGCACGGTTAAACAAGCAACACCAGGAGGCGTTGTCAAAAA	-11.5	1.88	rplN_CDS
140785	+	10.69	AACTCGTATCTTCGGACCAGTTGCTCGTGAATTGCGTGAAAACAACTTTAT	-4.5	0	rplN_CDS
140879	+	35.63	ATGCCTTACTCAAGGAGGTGCGATCAGGATGCATGTAAAAAAAGGCGATAA	-8.2	20.68	rplX_CDS
141124	+	22.75	CTAAAACAGGTGAAGTGACTCGCGTAGGATACAAAGTGGAAGATGGCAAAA	-3.1	6.04	rplX_CDS
141153	+	14.31	TACAAAGTGGAAGATGGCAAAAAAGTTCGTGTAGCAAAAAAATCTGGGCAA	-2.7	20.91	rplX_CDS
141173	+	16.25	AAAAGTTCGTGTAGCAAAAAAATCTGGGCAAGTTCTAGATAAATAGTATTA	-7.4	4.14	rplX+5
141217	+	24.25	AGTATTAAAAGGAAGGGAGGTCTATCTCATGAACCGCCTTAAAGAAAAGTA	-7.7	5.33	rplE_CDS
141259	+	38.88	AGAAAAGTACAATAAAGAAATTGCACCTGCTTTAATGACTAAGTTCAACTA	-4.2	0	rplE_CDS
141551	+	18.06	CTTATTTCTGTATCTTTACCGCGTGTACGTGACTTCCGCGGGGTTTCTAAA	-8.4	0	rplE_CDS
141735	+	31.44	AAGAAGCTCGTGAGCTATTAACTCAAGTAGGTATGCCGTTCCAGAAATAAT	-5	0	rplE+1
141768	+	11.25	TGCCGTTCCAGAAATAATCAATGAAAGGGAGGCGAAATCGTGGCTAAAAAG	-7.2	0	rpsN_CDS
141770	+	11.06	CCGTTCCAGAAATAATCAATGAAAGGGAGGCGAAATCGTGGCTAAAAAGTC	-5.3	0	rpsN_CDS
141782	+	12.94	TAATCAATGAAAGGGAGGCGAAATCGTGGCTAAAAAGTCTATGATTGCGAA	-9.4	0	rpsN_CDS
141950	+	19.94	ATATAAAGGACAAATTCCTGGCGTGAAAAAAGCCAGCTGGTAATCCCCAAG	-10.5	0	rpsN+8
142007	+	12.88	AAGGAGGTAATTATATAATGGTTATGACAGATCCAATTGCAGATATGCTAA	-6.2	0	rpsH_CDS
142029	+	15.63	TATGACAGATCCAATTGCAGATATGCTAACTCGTATTCGCAATGCAAACAT	-8.4	3.73	rpsH_CDS
142080	+	34.88	GGTACGTCATGAGAAGCTTGAAATTCCTGCTTCTAAATTGAAAAGAGAAAT	-8.5	9.87	rpsH_CDS
142101	+	36.94	AATTCCTGCTTCTAAATTGAAAAGAGAAATTGCTGAAATTTTAAAGCGTGA	-6.3	3.99	rpsH_CDS
142149	+	22.06	TGAAGGTTTCATTCGTGACGTTGAGTTCGTAGAAGACAGCAAACAAGGTAT	-4.9	0	rpsH_CDS
142367	+	14	ACAAAGAAGCCCGTGCAAAACAAGCTGGTGGAGAAGTTCTAGCATACGTTT	-6.3	0	rpsH_CDS
142380	+	22.44	TGCAAAACAAGCTGGTGGAGAAGTTCTAGCATACGTTTGGTAAGAAGTTTA	-7.8	0	rpsH+8
142461	+	17.25	GTAGGTAAGAAGCTACTTGAGATTCCTTCTGATGTTACAGTAACGTTAAAT	-8.6	0	rplF_CDS
142531	+	34.88	TGAAAGGACCAAAAGGAGAATTAACTCGTACGTTTCACCCTGATATGGAGA	-5.1	13.75	rplF_CDS
142547	+	31.19	AGAATTAACTCGTACGTTTCACCCTGATATGGAGATTAAAGTAGAGGACAA	-5.4	9.8	rplF_CDS
142906	+	19.31	TACGTTCTCCAGAGCCTTACAAAGGTAAAGGAATCCGCTACGAAGGTGAAG	-8.8	0	rplF_CDS
142929	+	20	GGTAAAGGAATCCGCTACGAAGGTGAAGTTGTTCGCCGTAAAGAAGGTAAA	-9.9	4.77	rplF_CDS
142969	+	31.69	AAGAAGGTAAATCTGCTAAGTAAGATCGCTTAAAGTGAAGAAAGGAGTGAC	-5.1	28.08	rplF+28
143016	+	23.69	TGACCTAGATGATTACGAAAACTAGCAAAAATGCTGCTCGTCTTAAAAGAC	-6	4.24	rplR_CDS
143372	+	10.88	GGACTTAAATTTTAATAAAAGAAGGAGGGACACATGATTATGCGTCGTATT	-4.8	8.46	rpsE_CDS
143572	+	47.44	AGAAGTACCAGAAGCGATTCGCAAAGCTGTTGAAGATGCGAAAAAGAATTT	-6.4	0	rpsE_CDS
143581	+	43.13	AGAAGCGATTCGCAAAGCTGTTGAAGATGCGAAAAAGAATTTGATTGAAGT	-6.4	8.8	rpsE_CDS
143961	+	47.13	ATCGGTCGCCCGGAAGACCAACGCGTTACTGTAAGAACACTTGGTTTAAAG	-10	0	rpmD_CDS
144000	+	28.13	CTTGGTTTAAAGAAAACAAACCAAACTGTTGTTCATGAAGACAACGCTGCG	-9.9	0.81	rpmD_CDS
144020	+	44	CCAAACTGTTGTTCATGAAGACAACGCTGCGATCCGTGGTATGATTAATAA	-8.8	0	rpmD_CDS
144056	+	35	TGGTATGATTAATAAAGTATCTCATTTAGTTTCTGTTAAAGAACAATAAAA	-3.1	0	rpmD+2
144388	+	23.19	TTGCAGAAGGAACGGAAGTCACTCCTGAACTTCTTCTAGAGACTGGTGTTA	-9.2	11.85	rplO_CDS
144436	+	79.25	TTATTAGCAAACTTAATGCAGGAGTAAAGATTCTTGGCAACGGTAAATTAG	-7	1.52	rplO_CDS
144491	+	12	AAAATTAACTGTAAAAGCCAATAAATTCTCTGCTTCTGCGAAAGAAGCTGT	-7.9	0	rplO_CDS
144500	+	10.31	TGTAAAAGCCAATAAATTCTCTGCTTCTGCGAAAGAAGCTGTTGAAGCTGC	-10.3	6.07	rplO_CDS
144525	+	29.5	TCTGCGAAAGAAGCTGTTGAAGCTGCTGGCGGTACAGCTGAGGTGATCTAA	-11.1	0	rplO_CDS
144556	+	132.44	GTACAGCTGAGGTGATCTAACTTGTTTAAAACAATCTCCAACTTTATGCGT	-6.3	1.56	secY_CDS
144695	+	20.44	ACGCTGAAGCGTTACAGGCACAGTCTCAAATGGGTGTTTTTGATCTCCTTA	-8.6	2.91	secY_CDS
144852	+	1038.38	ACCGAAGTTTACCGAGTGGTCTAAGCAAGGTGAAGTTGGCCGCCGTAAATT	-13.5	0	secY_CDS
144916	+	10.94	AGGTACTTTACGATTGTGCTTGGTTTCATCCAAGCGTTAGGTATGTCATAT	-12	0	secY_CDS
144936	+	40.38	TGGTTTCATCCAAGCGTTAGGTATGTCATATGGATTCAACAATCTGGCAAA	-7.5	0	secY_CDS
144960	+	16.25	GTCATATGGATTCAACAATCTGGCAAACGGTATGCTGATCGAAAAATCCGG	-8.5	0	secY_CDS
145012	+	21.13	GTATCGACATATCTTATCATTGCTTTAGTGCTCACTGGCGGAACTGCCTTT	-5.5	0	secY_CDS
145028	+	23.63	TCATTGCTTTAGTGCTCACTGGCGGAACTGCCTTTTTAATGTGGCTTGGGG	-8	18.61	secY_CDS
145223	+	11.13	AAGTCGCACTTCTTGTGATTGCGATTTTAGCAGTTATTGTTGGAGTTATTT	-12	0	secY_CDS
145295	+	130.38	AAATTGCGATTCAATATGCTAAAGGCACAGGTCGTTCACCTGCTGGCGGAG	-9.1	6.5	secY_CDS
145367	+	17	TGAAAGTGAATCCTGCAGGGGTTATTCCGGTAATCTTTGCGGTTGCGTTTT	-14.8	0	secY_CDS
145424	+	23.88	CGCCGCGGACGATCGCGTCATTCTTTGGAACAAACGATGTGACAAAGTGGA	-12.7	2.77	secY_CDS
145581	+	261.75	AATGGCTGATAACCTTAAAAAACAGGGTGGCTATATCCCGGGGGTTCGTCC	-11.1	3.17	secY_CDS
145616	+	32.56	TCCCGGGGGTTCGTCCAGGGAAAATGACTCAAGATAGAATTACGAGCATTT	-16	3.36	secY_CDS
145811	+	33.81	CAATGAAACAACTAGAAAGCCAGTTGGTGAAACGAAACTACCGTGGATTTA	-4.9	3.36	secY_CDS
145852	+	2316.63	CGTGGATTTATGAAAAACTAGAGGAAATGGATTTATCCATTCCCTCTTAAT	-13	0.02	secY+30
145881	+	34.63	GATTTATCCATTCCCTCTTAATAAAGAGAGGACGGGGGAAATCCGAATGAA	-15.2	0	adk_CDS
145947	+	14.5	GCTTCCTGGTGCCGGTAAAGGCACACAGGGCGAACGAATTGTTGAGGATTA	-17.3	0	adk_CDS
146128	+	466.31	GTAAAAGAGAGACTTGGCAAAGATGATTGTGAAAGAGGTTTTCTTCTGGAC	-6.8	0	adk_CDS
146137	+	433.44	AGACTTGGCAAAGATGATTGTGAAAGAGGTTTTCTTCTGGACGGATTTCCG	-9	2.98	adk_CDS
146202	+	18.69	AGCCGAAGCTCTTGAAGAAATTCTTGAGGAATACGGCAAGCCGATTGATTA	-12.7	0	adk_CDS
146326	+	36.25	GGCACAACCTATCATTTAGTCTTTAATCCGCCGAAAACGCCGGGTATTTGT	-6.5	0	adk_CDS
146355	+	14	GCCGAAAACGCCGGGTATTTGTGATAAAGACGGAGGCGAACTCTATCAACG	-8.2	21.97	adk_CDS
146362	+	16	ACGCCGGGTATTTGTGATAAAGACGGAGGCGAACTCTATCAACGGGCAGAT	-8.5	11.89	adk_CDS
146429	+	10.06	TCTCTAAACGGCTTGAGGTAAACATGAAGCAAACTCAGCCTTTACTCGATT	-9.1	0	adk_CDS
146668	+	21.81	TTAAACCAGGAATCTCGACAAAAGAATTGGATCAAATTGCCGAACGTTTTA	-2.2	0	mapA_CDS
146744	+	12.06	TTTTAAGGGGTATAATGGGTTTCGCGGGAGCATTTGCGTATCAGTTAATGA	-8	0	mapA_CDS
146794	+	23.06	AAGAACTCGTTCACGGCATACCTGGCAGCAGGGTGCTGAAGGACGGTGACA	-19.4	0	mapA_CDS
146992	+	125.13	CAGGTGAACGTTTGTCGAATATTTCCCACGCAATACAAACGTATGTCGAAA	-6.2	0.32	mapA_CDS
147219	+	217.69	GCTGATAACTGGACGGTTGTAACGGTAGATGGGAAAAAGTGTGCTCATTTT	-10.1	0	mapA_CDS
147342	+	41	AAGACAGATGTTTTTCAAGCTTGATAGGGCAGAAAGCTTGGGTGAACATTG	-14.2	0.64	ybzG_CDS
147394	+	312.81	CAAGACCGAATTCATCTTGCTTCTTGTCGTTGGAATTTTAACCATCATCAA	-4	0	ybzG_CDS
147507	+	10.94	ATTTAACCCTTTATGATTGCGTATCTCCGGAAGTTCAGAACAGTATAAACG	-1.5	2.4	ybzG_CDS
147554	+	13.75	AACGAAACAGGGCGTGTGACAAACTTCTTTTGAAATTTGTCAGAAAGCAAG	-12.2	0	ybzG+18
147604	+	21.19	GTTACTGATTTGAAGAAGGGAGAACACTTGAATGGCGAAAGACGATGTAAT	-0.9	2.61	infA_CDS
147763	+	10.13	CTTCATTCGCATTTTACCTGGAGACAAAGTTACGGTAGAATTATCTCCATA	-6.3	0.05	infA_CDS
147875	+	76.13	GGTTGGAAACACATGAAAGTGAGACCATCAGTTAAACCAATCTGCGAAAAA	-6.8	0	rpmJ_CDS
147903	+	13.63	CAGTTAAACCAATCTGCGAAAAATGTAAAGTTATTCGCAGAAAAGGAAAAG	-12.4	0	rpmJ_CDS
147906	+	13.38	TTAAACCAATCTGCGAAAAATGTAAAGTTATTCGCAGAAAAGGAAAAGTAA	-12.4	0	rpmJ_CDS
147910	+	12.81	ACCAATCTGCGAAAAATGTAAAGTTATTCGCAGAAAAGGAAAAGTAATGGT	-12.4	0	rpmJ_CDS
147939	+	37.63	GCAGAAAAGGAAAAGTAATGGTGATCTGTGAAAATCCAAAGCATAAACAAA	-3	9.48	rpmJ_CDS
148070	+	12.94	TATTTCTTTAACATACATCTTCGGAATTGGCCGCACAACGGCTCAGCAAGT	-7.5	0	rpsM_CDS
148283	+	18.56	CGGAATCCGTCATCGCAGAGGATTACCTGTTCGCGGACAAAACTCTAAAAA	-8.8	5.18	rpsM_CDS
148336	+	38.38	ACGCGCGTACTCGTAAAGGTCCGCGTCGTACTGTAGCTAACAAGAAAAAAT	-10.9	0	rpsM_CDS
148419	+	20.19	CTCGTAAATCTAACACGCGTAAACGTCGCGTGAAAAAGAATATTGAGTCTG	-12.1	0	rpsK_CDS
148446	+	13.38	GCGTGAAAAAGAATATTGAGTCTGGAATTGCTCATATTCGTTCAACTTTCA	-9.7	0	rpsK_CDS
148523	+	14.25	ACTCATGGTAATGCTATTTCTTGGTCTAGTGCCGGAGCTTTAGGATTCAGA	-9.4	1.57	rpsK_CDS
148599	+	20.38	CTGCGCAAATGGCTGCAGAAACAGCTGCTAAAGGTTCAATCGAACATGGTC	-10.4	0	rpsK_CDS
148753	+	18.69	AACTCCTGTTCCTCATAACGGATGCCGTCCACCAAAACGTCGCCGCGTGTA	-5.8	6.45	rpsK_CDS
148918	+	606.63	TTCGGATGGAATCTCATATGATTCTATTCGAGGTTTCGACGTTTTGAAGGA	-19.1	18.92	rpsK+164
149084	+	39.19	CTCTGGGTAACTCCTTACGTCGTATCCTCTTATCCTCACTCCCTGGTGCCG	-7.4	0.7	rpoA_CDS
149100	+	31.56	ACGTCGTATCCTCTTATCCTCACTCCCTGGTGCCGCTGTAACATCAATCCA	-2.7	0	rpoA_CDS
149102	+	31.69	GTCGTATCCTCTTATCCTCACTCCCTGGTGCCGCTGTAACATCAATCCAGA	-3.5	0	rpoA_CDS
149132	+	39.81	CCGCTGTAACATCAATCCAGATAGATGGTGTACTGCACGAATTCTCGACAA	-11.5	12.32	rpoA_CDS
149499	+	73.88	TTCTCGTGTATCTTATCAGGTAGAGAACACTCGTGTAGGCCAAGTTGCAAA	-8	0.4	rpoA_CDS
149559	+	37.38	ACTTACACTTGATGTTTGGACTGATGGAAGCACTGGACCGAAAGAAGCAAT	-6	6.29	rpoA_CDS
149584	+	50.94	GGAAGCACTGGACCGAAAGAAGCAATTGCGCTTGGTTCAAAGATTTTAACT	-9.3	41.88	rpoA_CDS
149633	+	25.81	CTGAACACCTTAATATATTCGTTGGTTTAACTGACGAAGCTCAACATGCTG	-9.1	1.6	rpoA_CDS
149777	+	25.13	TAAAGCGTGCGGGTATTAACACGGTTCAAGAGCTTGCGAACAAGACGGAAG	-6.4	26.79	rpoA_CDS
149907	+	16.69	ACTTCGCAAAGACGATTGACTAGTTTCCCTTGTGAACTAGGATTTTCGTGT	-9.5	0	rpoA+32
150022	+	49	GACGTACGAGTGCACAGCGTAAAGCTATGCTTCGTGATCTTACAACTGATT	-14	0	rplQ_CDS
150182	+	124.38	TCAAGCTGCTGCATACATCCGCAACGAGGTTGCAAACGAAGAAAATAATCA	-6.5	10.31	rplQ_CDS
150390	+	3410.19	AAGGGCGGGACAGTTTCTAACTGGATCTATGCCCTTTTTTTAGATACTGCA	-13.3	53.72	rplQ+75
150601	+	24.56	TGGCTTGCAATCGTAGGTCATAACGGTTCAGGGAAATCAACACTGGCCCGG	-16	22.08	cbiO_CDS
150761	+	47.19	AAAATCCGGATAACCAATTTGTCGGAACGACTGTTCGCGATGATGTGGCTT	-13.5	3.53	cbiO_CDS
151269	+	11.88	TTTGGAAGAAAACCATTTGACTCAGGAAGGGCTGGTGAAAGAGCTGTGGAC	-7.3	0	cbiO_CDS
152219	+	28.13	ACTTCACTTGTGCACCGGCTTGACCCCAGAACAAAACTGATCACGATCTTT	-2.9	3.4	ybaF_CDS
152799	+	13.94	CGCTCTTCGTCAGCGCATTTAAACGCGCCGAAGAGCTTGCGGTGGCAATGG	-23.1	0	ybaF_CDS
153156	+	70.38	ACGCAGCCGGACAGGTGATTCATTTTGACACTCCGCTGTCTATCCCGGCTG	-15.8	1.3	truA_CDS
153309	+	239.63	AAAAAGAATATCGCTACTTTGTATACACGGAGAAACACCCGGACGTATTTA	-4.2	0	truA_CDS
153340	+	12.56	GAAACACCCGGACGTATTTAAACGGCATTACGCTTACCATTTTTCATATCG	-2.7	1.43	truA_CDS
153372	+	24.13	CTTACCATTTTTCATATCGCCTTAATGTGCAGGACATGAGAGAAGCGGCAA	-9.9	0	truA_CDS
153429	+	11	TTATAGGGACACATGATTTTACGAGCTTTTGCGCGGCTAAAACAGAAGTGC	-6	4.8	truA_CDS
153457	+	24.19	TTGCGCGGCTAAAACAGAAGTGCAGGACAAGGTAAGAACGATATACGAACT	-7.5	3.74	truA_CDS
153511	+	14.63	TTGGACTGAGACGGCTGACGGCCTGCAAATGCGGATCACAGGCAGCGGTTT	-13	6.08	truA_CDS
153553	+	12.81	CAGCGGTTTCTTATATAATATGGTCAGAATTATTGCGGGTACTTTGCTTGA	-5.7	0	truA_CDS
153653	+	16.88	GCGAAGGATCGCGAAGCGGCAGGGCGCACAGCGCCGGGGCACGGGCTATAT	-17	8.3	truA_CDS
153877	+	27.25	TAGGAGGGAAATTCAATGCGTACAACACCTATGGCTAACGCAAGTACTATT	-5.3	0	rplM_CDS
153917	+	19.19	CAAGTACTATTGAACGCAAGTGGTTAGTTGTTGATGCTGCTGGCAAGACTT	-7.7	0	rplM_CDS
153963	+	25.75	GACTTTAGGTCGTCTTTCTTCAGAAGTTGCAGCTATCCTTCGCGGAAAACA	-6.9	0	rplM_CDS
153996	+	34.06	TATCCTTCGCGGAAAACACAAACCAACTTACACACCACACGTTGATACTGG	-3	1.01	rplM_CDS
154106	+	21.94	ACAAAATCTACTACCGTCACACTCAACATCCAGGCGGATTAAAATCAAGAA	-5.4	0	rplM_CDS
154115	+	24.13	ACTACCGTCACACTCAACATCCAGGCGGATTAAAATCAAGAACTGCTCTTG	-7.8	0	rplM_CDS
154142	+	48.63	GATTAAAATCAAGAACTGCTCTTGAAATGCGTACAAACTACCCTGAGAAAA	-5	0	rplM_CDS
154284	+	24.06	TCCACACGAAGCACAAAAACCTGAAGTTTACGAACTTCGCGGTTAATTAAA	-9.7	12.86	rplM+5
154421	+	49.31	AGAAGGCCGTATCGTCGTTAATAATCGTGAAATCAGCGAACATATCCCATC	-4.3	16.51	rpsI_CDS
154440	+	45.88	AATAATCGTGAAATCAGCGAACATATCCCATCTGCAGCTTTAATCGAAGAT	-2.8	2.38	rpsI_CDS
154585	+	23.31	TCCGTCACGGTATCGCTCGTGCTTTGCTTGAAGCAGATCCAGAATACCGTA	-14.4	6.73	rpsI_CDS
154740	+	890.38	TAATTTTACGTTTTCAAAAAGCTCTCGACCTTGGGTTGGGAGCTTTTTTCT	-20.1	55.35	rpsI+48
155952	+	163.56	AACAAGAAGCGTGAAAGTATGAAAAGCAGCGACCTGTTAGAGGGGCTGCTT	-13.9	68.55	ybaJ+29
157515	+	22.25	CGAACCTTTTCTTCAAAGACCTCTGGGAGAATTGGATGCCGTTAAGGAAAT	-9.8	0	salA_CDS
157714	+	18.88	CCTGAAGAAACGGTTGCTAAATTCCGGGCGCCGTCAGCTGAGAAAAAAACA	-9.6	0	salA_CDS
158027	+	10.44	AAAATGCCCCGGTCGTATGGAGAGGGCCGATGCTCGGCAAAATGCTGAATA	-15	0	salA_CDS
158518	+	1031.56	GTGCAGGTATAAAAGGTGAACCGGGATTCCAGATCCCGGCTTTCCCTTTAT	-18.4	21.28	salA+39
158543	+	19.38	ATTCCAGATCCCGGCTTTCCCTTTATTCACTTTCTTTTGCTGTGTCTTTTG	-4.6	0.23	salA+64
158829	+	25.38	AGCAAAATCAGTGTCTTCAAAGATGTTTTTCCAAAATTCTTCACCTTTTTT	-1	0	salA+350
160116	+	18.25	ATTGGCCGGTAGGGGGTCTTAATAGCTGTATGTCTTTGACCCCTAACTTTT	-14.5	1.56	kbaA+338
160818	+	122.88	TGTTATAGTAATAAAGCTGCTTCGTTAAGCGGCAGTAATGATCTTTGAAAA	-9.4	46.01	kbaA+1040
160892	+	23.56	TTAATTCATTTTTATAAATCGCACAGCGATGTGCGTAGTCAGTCAAACTAC	-9.8	25	kbaA+1114
162511	+	196.31	ATATAAGACCTTGGGTCTTATAAACAGAACGTTCCCTGTCTTGTTTAGTTT	-13.6	71.43	kbaA+2733
162611	+	13.56	GACATCACATTCAAGTAATACAAGATATCACATAGTGATTCTTTTTAACGG	-5	55.56	kbaA+2833
165866	+	39	ACCTGCGGAGCATTGCTTCCATAGCTCAGCAGGTAGAGCACTTCCATGGTA	-16.4	0	kbaA+6088
165903	+	2960.5	GCACTTCCATGGTAAGGAAGAGGTCAGCGGTTCGAGCCCGCTTGGAAGCTT	-14.1	11.11	kbaA+6125
166033	+	12148	ACCACCTTGCCAAGGTGGGGGTCGCGGGTTCGAATCCCGTCTTCCGCTCCA	-20.3	32.49	kbaA+6255
166141	+	1395	TTTGACTACGGATCAAAAGGTTAGGGGTTCGACTCCTCTCGGGCGCGCCAT	-9.9	13.69	kbaA+6363
166237	+	273.63	GTAGAGCACATGGTTTGGGACCATGGGGTCGCAGGTTCGAATCCTGTCTTC	-15.1	0	kbaA+6459
166329	+	15314.8	CCTGCTTTGCACGCAGGAGGTCAGCGGTTCGATCCCGCTAGGCTCCACCAA	-19.3	71.22	kbaA+6551
166423	+	153.63	ATACTAATAAAGTTGCTTTAACAAAGCGGACAAACAAAATGATCTTTGAAA	-4.7	33.1	kbaA+6645
166449	+	24.94	CGGACAAACAAAATGATCTTTGAAAACTAAACAAGACAAAACGTACCTGTT	-0.7	58.33	kbaA+6671
166500	+	36	AATTCAGTTTTTAAAAATCGCACAGCGATGTGCGTAGTCAGTCAAACTACT	-10.4	28.57	kbaA+6722
168119	+	230.56	ATATAAGACCTTGGGTCTTATAAACAGAACGTTCCCTGTCTTGTTTAGTTT	-13.6	64.29	kbaA+8341
168219	+	19.44	GACATCACATTCAAGTAATACAAGATATCACATAGTGATTCTTTTTAACGG	-5	66.67	kbaA+8441
171139	+	12.06	AGTGTGGCGACACATGGAGCTGACAGATACTAATCGATCGAGGACTTAACC	-8.8	66.67	kbaA+11361
171196	-	11.63	TCCGTGTTCGGTATGGGAACGGGTGTGACCTCTTCGCTATCGCCACCAAAC	-11.5	100	ybbA+8399
171312	+	35.44	CGCCGATGGTAGTCGGGGGTTTCCCCCTGTGAGAGTAGGACGCCGCCAAGC	-15.1	100	kbaA+11534
171421	+	50.13	ATACTAATAAAGTTGCTTTAACAAAGCGGACAAACAAAATGATCTTTGAAA	-4.7	31.19	kbaA+11643
171450	+	23.75	ACAAACAAAATGATCTTTGAAAACTAAACAAGACAAAACGTACCTGTTAAT	-0.9	7.23	kbaA+11672
171478	+	22.94	CAAGACAAAACGTACCTGTTAATTCAGTTTTTAAAAATCGCACAGCGATGT	-5.9	9.59	kbaA+11700
171500	+	30.31	TTCAGTTTTTAAAAATCGCACAGCGATGTGCGTAGTCAGTCAAACTACTTT	-10.4	32.5	kbaA+11722
173115	+	215.81	ATATAAGACCTTGGGTCTTATAAACAGAACGTTCCCTGTCTTGTTTAGTTT	-13.6	56.25	kbaA+13337
173216	+	11.44	ACATCACATTCAAGTAATACAAGATATCACATAGTGATTCTTTTTAACGGT	-5	85.71	kbaA+13438
176139	+	13.69	AGTGTGGCGACACATGGAGCTGACAGATACTAATCGATCGAGGACTTAACC	-8.8	100	kbaA+16361
176312	+	24.88	CGCCGATGGTAGTCGGGGGTTTCCCCCTGTGAGAGTAGGACGCCGCCAAGC	-15.1	100	kbaA+16534
178559	+	43.56	AGATGGCATAAAATAGAGAAGCCCAGATGAATGAGATCTGGGCTTTTTTAT	-22.2	18.37	ybaR+40
179274	+	26.38	CAAAGCTTTGCTTGATGGCAGTGATTGCGATTAACAGTTCAGCGATTGCTC	-12.2	9.41	ybaS_CDS
179306	+	13.44	AACAGTTCAGCGATTGCTCCTTATTTCAAATCCATTGATTTGAGATTTGCA	-10.3	0	ybaS_CDS
179618	+	84.5	ATGTTGCAGAAGGCATAAAAAAACCGCTCATAGGGTTGAGCGGTTTTTTCC	-21.8	44.83	ybaS+33
[truncated: 3,858 more rows]

## Sheet: NusA depletion nusG deletion
3' End	Strand	CV	3' end and upstream 50 nt	ΔG-51nt (kcal/mol)	%T	Relative Position
[truncated: 4,721 more rows]

[truncated: 1 more sheets: Legend]
