# Supplementary material for: NusG is an intrinsic transcription termination factor that stimulates motility and coordinates gene expression with NusA
Source: eLife journal article supplement (doi:10.7554/elife.61880), 2021-04-09
Supplement: supp [file elife-61880-supp-v1.zip › elife_poa_e61880_Supplementary_file_3.xlsx]

## Sheet: p-values Figure 1A
	WT	NusAdep	ΔnusG	NusAdep ΔnusG
WT		< 2.2e-16	< 2.2e-16	< 2.2e-16
NusAdep	< 2.2e-16		2.568e-05	< 2.2e-16
ΔnusG	< 2.2e-16	2.568e-05		< 2.2e-16
NusAdep ΔnusG	< 2.2e-16	< 2.2e-16	< 2.2e-16

## Sheet: p-values Figure 1C
	SI	req A	req G	req A and G	req A or G
SI		3.718e-06	3.566e-08	< 2.2e-16	0.0001308
req A	3.718e-06		0.02946	2.689e-09	0.08055
req G	3.566e-08	0.02946		0.007904	0.0001322
req A and G	< 2.2e-16	2.689e-09	0.007904		< 2.2e-16
req A or G	0.0001308	0.08055	0.0001322	< 2.2e-16

## Sheet: p-values Figure 1-fig supp 4
	SI	req A	req G	req A and G	req A or G
SI		0.004984	0.07718	0.0001703	0.4163
req A	0.004984		0.6505	0.1609	0.01374
req G	0.07718	0.6505		0.1371	0.1569
req A and G	0.0001703	0.1609	0.1371		0.0001852
req A or G	0.4163	0.01374	0.1569	0.0001852

## Sheet: Legend
Supplementary file 3. Pairwise p-values.
