# Supplementary material for: NusG is an intrinsic transcription termination factor that stimulates motility and coordinates gene expression with NusA
Source: eLife journal article supplement (doi:10.7554/elife.61880), 2021-04-09
Supplement: supp [file elife-61880-supp-v1.zip › elife_poa_e61880_Supplementary_file_4.xlsx]

## Sheet: Sheet 1
Term-seq POT	Strand	Dist	Relative Position	revised upstream sequence	revised predicted terminator hairpin sequence	revised downstream sequence	Classification	Log2FC
3113	+	3	dnaN+41nt	CCGAUACAC	ACUGCUGCCGACCCGUCGGCAGCUUU	UCUAUUUUC	NA	NA
6827	+	2	gyrB+46nt	AUCAUAAAA	AAGCCUUAUUUCCAAUAAGAAAUAAGGCUU	UUUUCUGAA	NA	NA
9494	+	3	gyrA+38nt	GUGAAAAAA	AAAGCGCAGCUGAAAUAGCUGCGCUUU	UUUGUGGUC	NA	NA
26735	+	0	scr+100nt	AUUUUCAGA	CUCACCUAAUAUUAGGUGAG	UUUUUUGUU	NA	NA
28959	+	4	yaaK+111nt	UUAUGAAAU	AAUUGCCAGGGAUCGGACCGAAAACAGCGGUUCGUCUGGCUUUU	UUUGUGUUC	NA	NA
42896	+	2	yabA+40nt	AUAGGGAAA	AAGGCUUCCGCAUAAGACGGGAGCCUU	UUUCAAAGG	NA	NA
47679	+	0	metS+52	UAAACAAAA	GGUGUUUCACGUGUAACAAUUCGUCGAACACC	UUUUGUGUU	NA	NA
53057	+	1	veg+35nt	AUUUUAACG	GGCAGUGAACCUUUUGUUUACUGCU	UUUUGUUUU	NusG-dependent	7.57
59438	+	0	ctc+41nt	AUAGCUUAA	GGCGUAACCCUCCCGCGGUUACGUC	UUUUGUGCU	NA	NA
64703	+	2	spoVT+70nt	GGUAUGUAA	AAGAACAGCUCUCCUUGGGACGCUGUUCUU	UUUCAUGGC	NusG-dependent	9.45
74065	+	4	yabS+226nt	CUUUCUCAA	CAAAGGCCCAGUCCGUUACGAUGGGGCCUUCU	UUUUUUGAU	NA	NA
82735	+	0	cysK+38nt	AAGCCAAAA	CUCCCGGUUCGCCGGGAG	UUUUUUUAU	SI of NusG	1.26
84935	+	1	pabA+62nt	GGUAUAUGG	AGGAGAAAGAUGCAGUUCUUUCUCCU	UUUGACCAU	NA	NA
90275	+	2	lysS+51nt	UAAUAAAAA	AAGAGCGGUAUCCUCCAUAGGGAAAGGAUGCCGCUCUU	UUUAAAUUC	SI of NusG	7.91
106057	+	2	clpC+55nt	AAGACGGAA	AAUGAGGCAUACAGCAUGUAAGUGUAUGCCUCACU	UUCAUAUAU	NA	NA
117779	+	3	secE+71nt	CUUGCCAAA	AAACCCGUUCAGCGGGUUU	UUUAUUUGU	NA	NA
121030	+	4	rplL+56nt	UGUAGGGGA	GGAAGCUCGCUUUUAUGAGGCGAGCUUUU	UCUUUGCCA	NA	NA
134077	+	0	tufA+5nt	GAAGGCGGA	CGUACUGUUGGUUCAGGCGUUGUUUCUACAAUCACUGAGUAAUAGUAUG	GUUUUAAAC	NA	NA
150381	+	4	rplQ+70nt	AAAGAAGGG	GGGCGGGACAGUUUCUAACUGGAUCUAUGCCCUUUU	UUUAGGAUA	NusG-dependent	6.21
158520	+	4	salA+45nt	AGGUAUAAA	AAAAGGUGAACCGGGAUUCCAGAUCCCGGCUUUCCCUUUA	UUCACACUU	NA	NA
178559	+	3	ybaR+43nt	AAAUAGAGA	GAAGCCCAGAUGAAUGAGAUCUGGGCUUU	UUUAUAAUA	NusG-dependent	8.23
196080	+	1	rsiW+29nt	GAACGGAGA	AGAGUAAAGCGCGUUAGCCGCUUUGCUCU	UUUUUUGCG	NusG-dependent	7.06
205300	+	4	adaB+414nt	UUGAAGUGA	UGAAGCCGACAAUUUUCAGGAUUCAAUGAUCUAACAUAAUCAUUGAAAUUUUGAAGUUGUCGGCUUUU	UUGUUUUGG	SI of NusG	6.72
211762	+	3	ybzH+34nt	GAUAUAAAA	AAAUAAACAUCAAAAGAUGUUUAUUU	UUACACCCA	NA	NA
223221	+	3	ybdK+312nt	CCAAAAAAA	AAGUUCUUGUUCCGCUUUUGGGACAAGGGUUU	UUUUAUUGU	NA	NA
258842	+	4	ybgB+39nt	CUAAAUCAA	CAAACAGCCAGAAUAAAACUGGCUGUUUU	CUUUAAAUU	SI of NusG	7.64
273983	+	4	ycbG+49nt	UGGUGAGCA	GCAACCGCAGUUGAAACGUAAGAGCUGCGGUUUU	UUUAAACCA	NA	NA
277081	+	4	ycbJ+327nt	UACCGCGAG	GAGACCCUCGUCCUUUGCAUAGGACGGGGGUUUU	UUGUGUGUU	NA	NA
292887	+	4	estA+48nt	AAAAACAAA	AAAACCUUGAAGAAUGCUAUUCUUCAAGGUUAU	UCUGCGCUU	NA	NA
305587	+	4	rapJ+40nt	AUAGGAAAU	AAUGGCAGAGAACUACAGGUUCUCUGCUUUU	UUUGUGUGC	NusG-dependent	11.89
309327	+	4	adcA+40nt	AAUCAUAAG	AAGAUAGUGUGCGCCGGAGGGGUGCACACUAUUUC	UUUGUGUGA	NA	NA
314839	+	3	yceF+44nt	AACAAAACA	CAAGGAGGGAGGUUCAAUGUCCUUCCUUU	UUUGUUUAC	NusG-dependent	8.23
318960	+	4	yceI+37nt	AAUAGGAAA	AAAAGCACCUCUUAAAAGAGGUGCUUUC	AGCGUUGUC	NA	NA
320405	-	4	yceJ+20nt	UUUUUGGAA	GAAACCCUCUAACAAAGGGUUUU	CUCUACAUA	NA	NA
324036	+	2	opuAC+38nt	AAUCAAAAA	AAGCAGCCUGUGUCAGGCUGCUU	UUUUUGCGU	SI of NusG	5.53
327895	-	4	mdr+4550nt	UUUGAUACG	ACGAUGUCGGCUGAUACAGCCAGUACCAGUUCGACAUGCU	UUUAUCUCU	NA	NA
339143	+	1	nadE+38nt	GUUGAAGAA	AGCCCGCUCUCGGAGCGGGCU	UUUGUCGUU	SI of NusG	6.64
349995	+	2	ycgP+38nt	AAAUAAAAA	AAGAAACCAGUACUUGUACUGGUUUCGU	CUUCACUUU	NA	NA
355648	+	1	ycgT+1781nt	CCGUCUGAA	AGCUUGAAAACCGCGAGCU	CCUUAUCUU	NA	NA
371691	-	4	nin+42nt	AAUGAAAAA	AAACCCCUGAGAGAAUAACUCUCAGGGACUC	UUUAUAUAU	SI of NusG	5.94
403152	+	4	srfAD+40nt	GUGAUCAAA	AAAAGCGGACAGCUUCGGCUGUUCCGCUUUU	UUUGUGUGU	SI of NusG	12.98
404478	+	2	ycxA+37nt	CAAUAUAAA	AAGGAUCAGCACUGUCAAUGCUGAUCCUU	UUUAAAUUU	NA	NA
409171	-	4	yczE+41nt	AUAAGAAAA	AAAACAGAGCGUCAGCGCCCUGUUUC	AGAUUGUUA	NA	NA
428710	+	3	yclK+45nt	UAGCAUACA	CAGGGCGGCGCAUCAACUGAUGCAUCCGCCUUU	UUUGCAACA	NA	NA
444387	+	3	gabD+52nt	GCUCCUGAG	AGAGCUGCCGGAUUUUCCGGCAGCUCU	UUUUGUUGU	NA	NA
455775	+	3	ycsD+40nt	AUGAAAAAA	AAACCCUUCACAACAUUUUGUGAGGGGUUC	UAUUUUUUG	NA	NA
466978	+	1	ycsN+35nt	UCCAUAAAA	AGCAUCAGUUUACCAGCUGAUGCU	UUUUCAAUA	NA	NA
475578	+	1	ydaH+39nt	UAAUAAGAA	AGGCUGGAUCAUAAAGAUCCAGCCU	UUUUGCGCC	NA	NA
486294	+	1	ydaN+339nt	GAUGUUAUG	GCACAGGGGCAUCCGUUUGCCUCUGUGU	UUUUUGUUG	NA	NA
490681	-	2	ydzK+98nt	AAGCAUGCA	AAGGACAAAUGCAUCUUCCUUUGAAACAAGAUGCAUUUGUCCUU	UUGUCUGGU	NA	NA
502883	+	4	ydbI+256nt	AUAAUACAA	CAAACAGUGCCUAAUGUUGGGCACUGUUUA	UUUUUUUGU	NA	NA
505059	+	4	ydbL+39nt	CCUGUGUAA	UAAUCGCGCUGUUCCCUUGGGGAACGGCGUGUUUU	UCUAUAUAC	NA	NA
506326	+	3	ydbM+32nt	AUAAAAAAA	AAAGAGCCUUACCGGCUCUUU	UUAUGUUAU	NA	NA
509353	+	1	ddl+42nt	UGAAGAAGG	ACACUGCCGGUAAAAGGGCAGUGU	UUUUUCCCG	NA	NA
512686	+	4	cshA+49nt	UCGAUUCAG	CAGAGCCCAAAACAUGAUGUUUUGGGCUUUU	UUAUGUGUU	SI of NusG	6.4
527933	+	1	ydcI+32nt	AAAAUAAAA	GCACUGCUUACGAGCAGUGU	UUUUUCCUU	NusG-dependent	10.1
530891	-	1	immR+240nt	AUUUGUAAU	UGCCCAUGAAUUAGGGCA	UUACUUUCU	NA	NA
552032	+	2	lrpA+105nt	CUCUAAAAA	AAGCCCUAGGUUGGAUAUGGAAUUUACCAAGCUGGGGCCU	UUUUAUACA	NusG-dependent	9.64
553217	-	3	ydeB-716nt	AAUGAAUAA	AAAGGAUGUCCAGAAGUAUUUUUCUGAACAUCCUUU	UUUAAGUGA	NA	NA
559533	-	4	ydeB+622nt	UGUAGCAUC	AUCUCCCUACUCGAACGUUGAGUAGGGUUUU	UUAUUGUUA	NA	NA
579262	+	2	ydzO+32nt	GCAAUGUAA	AACAGGCCUCUAAAGAGACCUGUU	UUUUAAUAU	NA	NA
626325	-	1	ydhU+8327nt	AACCGUAAA	AUCCUGAUUACAAAAUUUGUUUAUGACAUUUUUUGUAAUCAGGAU	UUUUUUUAU	NA	NA
640519	+	3	trnE.Asp+41nt	UAAUGUAAA	AACGAAACGAUCAUGUUUUCGUUUUUUU	UGUGUUUGU	NA	NA
640568	+	4	trnE-Asp+91nt	UGUAUCUUC	UUCUGCUUGGUGUCAUAGCCAAGCUUUC	UUUAUUAUA	NA	NA
644316	+	3	gcp+21nt	UCUUAUCAA	AAAGUCUCACGAGAUAAUAGCGUGAGACUUU	UUAUCUCUG	NA	NA
651990	+	3	groEL+125nt	AAAAAGAGA	GAAGGUCUUUCAUCAGUUUACUAAACUGUUGGGAGACCUUU	UCUCCAUAU	SI of NusG	5.97
657726	-	0	ydzW+67nt	GAUAAAAAA	CGGAGCUGGUUUUAUCCAGCUCCG	AUACUUUUU	NA	NA
657762	+	0	ydiP+65nt	AAAAAGUAU	CGGAGCUGGAUAAAACCAGCUCCG	UUUUUUAUC	NA	NA
679811	+	3	ydjM+53nt	AAUCUGGAA	AAAGCAAGAAGUCACAUUCUUGCUUU	UUCUAUUGG	NusG-dependent	2.32
680911	+	3	ydjN+41nt	CUAAUAAAA	AAACCACUCGGCAUGAGCUGAGUGGCUU	UUUUAAGGA	NA	NA
681107	-	0	ydjO+148nt	AAGAAAGAA	GCCCAAAACUGUAAACGUUUAGGGC	UUUUUUGUC	NA	NA
697033	+	3	yebC+38nt	AAUGAAAAA	AAACCGGCUAAUCCUAGCCGGUUU	UUUUAUGUC	SI of NusG	8.23
716782	+	4	yerC+41nt	AAAUAAAAA	AAAACCGCCCUGCCGUCUGGCAAGGGCGGUUUC	UUUAUUGAA	NA	NA
726801	-	4	opuE+43nt	UAAGCAAUA	AUAAGCCAUCAAGCGCAGCUUGGUGGCUUUU	GUGCUUUCU	NusG-dependent	0.5
739318	+	2	yefA+338nt	CCAUUAGCA	AAGAGAGAUAACUAAAUUGGAUUUAUCUCUCUU	UUUAUCGGU	NA	NA
753164	+	4	yeeI+37nt	UAAGGAGUG	GUGAGCAGGCUGUUAUGGCCUGCUUUU	UUUGUGUCC	NA	NA
757681	+	1	yesJ+29nt	GGCAGAAUA	AGCGUCCUUUGCAGGGGGCU	UUUUUGUCU	NA	NA
785084	-	0	yetG+29nt	CAAUAAAAA	GCUUGCGCCUUGCUGCAAGC	UUUUUUCUA	SI of NusG	6.64
785502	-	0	yetH+41nt	UAAACUGUU	GCGCACGGCGGUUCGAUUCCGCCCUGCGC	UUUCUUUGA	NA	NA
787613	+	3	yetI+56nt	GAAGUUUCC	CCAGGCAUAUGAUUGUCCGUCACCGGGUGAUCAUAUGCCUUU	UUGAUUUUU	NA	NA
788674	+	1	yetJ+39nt	UAAUGAAAA	AGCGUCUGUCAUUGGAUAGGCGCU	UUUUGCCAU	NusG-dependent	12.5
789654	+	4	yetK+30nt	GACGCUAUA	AUAGCCUGUCCGGAUCGGACGGGUUUU	UUAGUGUCU	NA	NA
798285	+	4	ltaSA+56nt	AAAGAGCCU	CCUUGAGCGGGCGCAUUGCCUUCGCUCAAGGCUCUUUU	UUUGGUGGU	SI of NusG	6.64
803283	-	3	yfnC+37nt	GCUGAAAAA	AAACCCCUGCCAGGCGGCAGGGGGUUU	UUUAAUCUA	SI of NusG	6.64
812599	+	4	yfmO-29nt	GUUUGUUAA	UAAACGCUAUUUUUGUAGCGUUUC	UUUUAAAUG	NA	NA
817770	-	0	yfmJ+40nt	AUGAAAACG	GGAGGGCUUUUUGCCCUCC	UUUUGUGUU	NA	NA
820837	+	0	yfmK+3080nt	AACACUUAG	GGAAUAGCAUUUAAUGCUAUUCC	UUAUUUCAA	NA	NA
822853	-	4	yfmF+54nt	AAUUCCCUA	CUAGGGCUGUCGAGAAACGUGACAGCCUUCA	UUUUCCCUU	NA	NA
839305	-	1	yflH+35nt	UAAAACAUG	AGCCGGGCGAUAUGCGCCCGGCU	UUCUUGAUU	NA	NA
844692	+	2	yflB+49nt	CUUGUCUGC	CAGGAUGGCGAUUGAUAAAAGCCAUCCUU	UUUAUGUGU	NusG-dependent	6.64
861551	-	3	yfkK+38nt	AAAUAAUGG	GGAGACUGGCCGGAAACUCGGCGAGUCUUU	UUUAUCCUA	NA	NA
874890	+	3	yfjO+91nt	UUCCUAAUA	UAAGACCUGGAUUUCGGUAAAAUAAACAAUUCCGAUUUCCGGGUCUUU	UUCGUGUGC	NusG-dependent	8.64
875796	+	3	yfzA+105nt	UAUGAGUGA	GAAGACUGCGACACUUAGUCAGCAGUCUAU	UUUAUGUGG	NusG-dependent	14.22
877503	+	4	dusC+104nt	CUAAAAUAA	UAAACCUGGAUUUUCGGUAAAUCCGGGUCUU	UUUUGGUAC	NA	NA
885809	-	3	yfjF+38nt	GAUAACAAA	AAAUGGCCUGCUUAUGAAGCGGGCCAUUU	UUGUUUUUU	NA	NA
909121	-	3	padR+80nt	UGCAAAAAA	AAACAUCUGCCUAAACGGCAGAUGUUU	UUUAGGUCG	NA	NA
922543	+	0	yfhA+40nt	AUCGUUACA	CCCAUUUUCUUAAAAAAGAAAAUGGG	UUUUUUUGA	SI of NusG	-1
924210	+	3	yfhC+42nt	AUGUAAAAA	AAACCCCUUGUCUCAAACGGAGACAAGGGGUUU	UUCAUUUAA	NA	NA
930630	+	0	yfhM+45nt	UCUCCAUCC	GUCUGUCAUAAUGGCAGAC	UUUUUCUGU	NA	NA
931842	+	1	csbB+36nt	UGACAAAAA	UGCACUGAAAAUACCAAGCGCCAUUGGCAGUGCU	UUUUUUGCU	NA	NA
939306	+	1	ygaC+46nt	UACGUAAAA	ACCUGUUGCGGGGUACAACAGGU	UUUUCACAG	NA	NA
942407	-	4	gsaB+46nt	AUACCUUGA	UGAACAGGAGCUUUGAGCUCCUGUUUU	UUUAUGUAU	NusG-dependent	6.64
952984	+	0	trnD.Leu1+37nt	GGCCCUCGG	CACCAAUUUUACUUACAUGGUAAGUUGAAUUGGUG	UUUGUGUUU	NA	NA
953040	+	4	trnD-Leu1+97nt	AUCAUAUUA	UUAAUGAUCUACAUAAGUAGAUCAUUUU	UUUAAGCUU	NusG-dependent	-6.4
955838	+	3	ygaJ+256nt	CUGACUGUA	UAACCGGGUUCAUUUAUAUGAAUCCGGUUU	UUUGUGUGC	SI of NusG	11.07
967198	+	2	trnSL-Gly1+62nt	ACGUUAUUA	AACGCAGUGUUUCGUUUCUCAGAUAAACGAAGUAUUGCGUU	UUUUUAUUG	NusG-dependent	6.06
970655	+	4	cspR+42nt	UAGUGAAAA	AAAACCCGCUCAUCGAUGAUGGGCGGGUUUU	UUUGCCGGA	SI of NusG	11.81
980358	+	3	yhcC+48nt	UAAUGAAAA	AAAGGCAAAUCCGUUUACUCAUGCGGGUUUGCCUUU	UUUGCUUGU	NA	NA
1013389	-	2	nsrR+24nt	UUUUAAAAA	AUGAAGGAAUAGAUUAAGAUUCCUUCUU	UUUUUAUUA	NusG-dependent	6.64
1035274	+	4	yhdR+51nt	GCAAAGAAA	AAAAGAAAACAGUUUUCAAGGCUGUUUUCUUUU	UAUAUUCCG	NA	NA
1040826	-	0	yheN+35nt	AAUAAAAAA	GUGAGGCGCAUAAAGCGGCUCAC	UUUUUCAUG	NA	NA
1049094	-	0	nhaX+48nt	AACCAAAAA	CCCAAAACACGAUUGUUUUGGG	UUUUUGAGC	NA	NA
1056619	+	3	yheA+1523nt	CAUACAUAA	AAAGUCUGCUGAGCCAGGCUUU	UUUUGCCUU	NusG-dependent	5.77
1064777	+	4	natB+42nt	GAUUGGAAA	AAAACAGCCUGGGGAUUCUCAGGCUGUUUC	UUUAUUUGA	NusG-dependent	8.97
1070032	+	2	yhaM+48nt	AACUUAAAA	AAGGACUGAUGCUGACAUAUUCAGCUCAGUCCUU	UUUGAUGGC	NusG-dependent	8.64
1072942	-	0	hpr+164nt	CGGCAAAAA	GCGCAAGGAGCUUAUCAAAGGUUACAAAUCCUUGCGC	UUUUUGUGU	NA	NA
1073843	-	2	yhaH+54nt	AAGAAAAAA	AAUGCGGGCCAAAAUUGGACCCGUAUU	UUUUUUGUU	SI of NusG	6.64
1074603	-	4	trpP+47nt	UCACACAAA	AAAACCUCUUCCGCUUCCGGGAGAGGUUUU	UUUGACAAG	NusG-dependent	7.6
1089640	+	3	hemY+34nt	UCAGCUAAA	AAACCUCCGCUUUAUCGCGGAGGUUU	UUUUGAUGU	NusG-dependent	12.48
1107561	+	4	yhfP+49nt	AACAGGAUC	AUCAGCUUGCAGAGAAUGUUAUUUUUCUGCAAGCUUUU	UUGUGUGGA	NA	NA
1112581	-	2	hemAT+41nt	CCAUCAAAA	AACCGGUCUGCCAUACGGCCGGUU	UUUUUGCGC	SI of NusG	8.23
1117732	+	4	comK+49nt	AAAAUAGGA	GGAAGGAGCUGACCGAACAGGGCAGCUCCUUUC	AUAAAGCUA	NA	NA
1122714	+	4	sipV+37nt	CGAAUAAAA	AAAAGACGCUAAUUGAAGAGGCGUCUUUU	UGUAUGCCG	NusG-dependent	-1.32
1156507	+	4	wprA+38nt	UAACCAAAA	AAAAGCGGUGCUCGAUGCACCGCUUUU	UUAUUUUGC	SI of NusG	6.64
1164185	+	4	degA+28nt	AACACAUGA	UGAGCCCGCUAAUGAGCGGGUUUU	UUCAUAUUA	NA	NA
1187657	-	0	yitS+43	AAACAAAAA	CAGUCAGACUCUGUGUCCUGACUG	UUUUUGUUU	NA	NA
1192605	+	2	yitW+45nt	AAACAAAAA	AAGGACAGCCUGACAUGUGAGGCUGUCCUU	UUUUACAAG	NA	NA
1204689	-	3	yjzD+45nt	AAGCCAAAA	AAACCCAAAACAUUUAUUGUUUUGGGUUU	UUUAGUGUG	NusG-dependent	10.04
1207822	+	3	comZ+37nt	AUAAGAAGA	GAAGCCACUUUUUUGAAAGUGGCUUU	UCACAUUGA	NA	NA
1218076	-	3	trpS+40nt	AAUCAAAAA	AAACCGCUCUUUGCAAAGAGCGGUUU	UUUUCAUGA	NA	NA
1219137	-	4	yjbE+9002nt	GUGGUACCA	CCACGGUUCAUUCGUCCCUUUUUUACAGGGGAAGAAUGAGCCUUUU	UUAUUAUUA	NA	NA
1221550	+	4	oppA+68nt	AAGACCUCA	UCAAGGUAUAUGGGGAGAAAAGCCCCAUAUACCUUUC	UUACUCUGA	NA	NA
1229759	+	4	mecA+39nt	UCAUAGCAA	CAAACCGAUUUCCUUCCGGAAAUCGGUUUU	UUUUAUGCA	NA	NA
1233544	+	1	pepF+450nt	ACAUAUGAA	ACCGCGCUUAUCCCGGCGCGGU	UUCUUUAGG	SI of NusG	6.27
1233580	-	0	yjbH+34nt	UGUGAAAAA	UAGCCGCAGGCGUGCAUAUGCUUGAGGCUG	UUUUUUUAU	NA	NA
1235132	-	4	yjbJ+35nt	UUACGCGUA	GUAACCAGAGGUGCUCUUUCCCUCUGGUUUU	UUUGCAGCG	NusG-dependent	12.6
1242427	+	0	tenA-22nt	AAUUCCAAA	CCACUUUUCCUUGCGGGAAAGUGG	UUUUUUUAU	SI of NusG	0.26
1247680	+	0	yjbV+28nt	CCGAUGAGA	UCACCAGCUGAUGGUGA	UCUCUUUUG	NusG-dependent	1.58
1256358	-	1	yjcF+79nt	UAUAAAAAA	ACCGUUCUCUGGUAUGAACGGU	UUUUUAUAC	NusG-dependent	8.64
1256402	-	3	yjcF+37nt	ACUGAACGC	GCAUCCGGAUCUUUUGAGAUCCGGAUUU	UUACUGGUC	NA	NA
1262895	+	2	trnSL-Val2+36nt	AUAGCUUAA	AACCCUUGCGCAGCAAGGGUU	UUUUACUUU	NusG-dependent	7.6
1263607	-	4	yjcM+99nt	GGGAAAGCA	GCAAUCCCCUGAUCUAGAGUGGUUCAGGGGAUUUU	UGUAAUAAU	SI of NusG	-0.78
1276291	-	1	yjdG+47nt	UCCUUAAUU	ACAAAAGCAGGCACUGCGCCUGCUUUUGU	UUGGAUUAU	NA	NA
1278180	-	4	yjzH+29nt	UGCGGAAAA	AAAAGCUUAAUCGAUAUGACUAAGCUUUU	UCGUUCCCC	NusG-dependent	-2.67
1284359	-	2	yjfB+14nt	GAAUCAAAA	AAGCGCCGCUGUAUGUGACGCUU	UUUUCAUGU	NA	NA
1289990	+	4	yjhB-28nt	AAUUUACAG	CAGUUGCACGUUUUUCAUCUGUGGAAAACGUGCAUUUU	UUAUAAUAG	NA	NA
1296580	-	4	yjlA+44nt	AGCAUCUGC	UGCAGGAGAAUGGGUGAAAGCCUGUUCUCCUUUA	UUUGUUGUU	NA	NA
1300318	+	0	ndh+66nt	AAUGAAUCU	GGCAUUGCCAAAAGCAUUCCUUUCCGAGUGCUUUCUGGCAAUGUC	UUUUUUUAU	SI of NusG	1.61
1309831	+	1	exuR+29nt	GACGACGUG	AUGUCCCGUUUUUCAGCGGGCAU	UCUUUAUAU	NA	NA
1320567	+	4	yjqC+45nt	GGUUCUCUU	CUUCUGGGCUGAGGAAUAUAUCCUCAGCCCGUAUU	UGAUCGAUC	NA	NA
1321206	-	1	xre+124nt	CUACCUUCC	AGUCCUAUACGGGCU	UUUCUUUCU	NA	NA
1334299	+	4	xkdM+56nt	AGCCCAUAC	UACGCAGACCUUUCUCAGAAAGGUCUGUUUU	UUAAAAAAG	NA	NA
1378468	+	3	purU+326nt	ACCACGGAA	AAACCCAUUUCGUCCUUAUGAAUCAGGAUGAAAUGGGUUU	UUUUAUUUG	NA	NA
1380906	+	2	proA+56nt	CAAUGAAAA	AAGCUUAUCUCAUUACGAGAUAAGCUU	UUUUAUACG	SI of NusG	8.64
1385680	-	2	ispA+1140111nt	ACGUAGAAA	AAGCCUCUUUCUCUCAUGGGAAAGAGGCUU	UUUGUUGGU	NA	NA
1388068	+	0	rsbRB+29nt	AUAAAAAAA	UCCGCUAUCUGUGAUAGCGGA	UUUUUUAUG	NA	NA
1410768	+	2	ykoX+193nt	UGUCUAGCA	AAGACCUUUGCCUUAUGUCGGCAAAGGUCUU	UUUUGCAAU	NA	NA
1422176	+	3	ogt+256nt	AACAAAAAA	AAACCGCUGACUCGGCUCCAAAUGAGCAAAGUCCAGCGGUUU	UUUAAUGCA	NA	NA
1424475	-	3	mtnU+295nt	UAGAUGUUA	UAAGCCUCCUUCUCUCUGAGAAGGAGGCUUU	UUUACGGGC	SI of NusG	9.61
1427032	+	3	ykrV+198nt	AGAAACGAA	AAACCUCUUUAGACGCGAUUGCAGUUUGAAGAGGUUU	UUUGAUUAU	NA	NA
1431457	-	4	kinD+33nt	CGCAUCAUA	AUAGCCCCCCUGACCAUGUCAGGAGGGUUUU	UUAUCCUAU	NA	NA
1439345	+	4	ykvI+214nt	CUAAGGACG	ACGAGCUGUAUCCUUGGAUACGGCCUUU	UUUAUAUGU	NA	NA
1439385	+	4	ykvI+254nt	UUUUCUAGA	AGAGCACCUUCCGAAAAAAGGUGUUUU	UUUGCGCGU	NA	NA
1453317	+	0	zosA+33nt	AAAAUAAAA	CCAGCAGCCUAAUCAGGCUGCUGG	CUUUUUAUG	NA	NA
1485359	+	4	ykzF+48nt	CCCUAUAAU	AAUUGAUACUCCACAAAGAGUAUCUUUU	UUAUUUUGA	NusG-dependent	8.81
1489732	+	3	dapH+52nt	UGAUAAAAA	AAAGGCGUGGAUAAUAUAUCCACGCCUUA	UUCGUAUAU	NA	NA
1491219	+	2	ykuS+37nt	AAUAAAAAA	AACCGAAGCAAAAAGCUUCGGUU	CUUUUAUUU	NA	NA
1494406	+	3	rok+47nt	UAAAGAAAA	AAACUGCUUGGCAUCGCUCAAGCAGUUU	UUUUAUUGA	SI of NusG	6.64
1499695	+	0	moaD+30nt	GGAUGAAAA	CCGGACGGCAUUUCAGCCGUCCGG	UUUUUCUGU	SI of NusG	5.64
1507326	+	3	yknZ+31nt	UUAUGAGUA	UAGCCUCAUGCAACAUGCAUGAGGUUU	UUUUAUAUG	NA	NA
1518189	+	2	abh+48nt	UGCUAAAAA	AAGGCGGAGUGAUAUCAUCUCCGCCUU	UUUUGCGGU	NA	NA
1521228	+	0	ktrC+32nt	CCAAAUAAG	CCGUCCUCAAAGGGCGG	UUUUUCAUA	SI of NusG	1.13
1552734	+	3	ylaN+44nt	AAUGAUAAA	AAACUCAAACUUAUUAACAGUUUGGGUUU	UUUUAUAAC	NA	NA
1565311	-	3	ylbA+39nt	GUAACGAAA	AAAGGUACAGCAUAUUUCGCUGUACCUUU	UAUGAUUAG	NA	NA
1570587	+	0	coaD+24nt	UUCAGACAA	GGAUGAGGGUUUUGACUCAUCC	UUUUUUUGU	NA	NA
1576722	-	0	ylbP+45nt	UCAAAACAA	CCGGCCUAUUCUUACUAUAGGGCCGG	UUCAUUUCA	NA	NA
1582025	+	1	ftsL+76nt	AUGAAUAGA	GGAGCAGCGAUUCUAAGUAUUUGUUUCGCUCUCU	UUUUCUUUU	NA	NA
1591505	+	3	spoVE+91nt	GAUGCGAUA	UAACCCUGUCCAACAAAACAGGGUUA	UCGUUAGUU	NA	NA
1593654	+	4	murB+84nt	AAACGACAA	CAAACGGCAUCAUAGUAUGCCGUUUG	UUUUGAAUA	NA	NA
1599020	+	0	ftsZ+40nt	UAAUGUAAA	GGACAAAAUCGUUUUCGAUUUUGUCC	UUUUUUGUU	SI of NusG	5.81
1607488	+	4	BSU_misc_RNA_24+24nt	CGGUGAAAA	AAAGCGGAGUACAUCGGACUCCGUUUG	UUUUUUUUA	NA	NA
1611638	+	2	ylmG+47nt	GUUUGAUAG	GGGGCUUGGCAGCAGCCAAGCCUC	UUUACAUUA	NA	NA
1618967	+	0	pyrR+118nt	CUUUGUAUG	CCUCUUUGCGUAAAAAAGCAAAGAGG	UUUUUUUAU	NA	NA
1620442	+	1	pyrP+113nt	UUUAACCAU	ACCCCGAGUCUAUCUUAGACCGGGGU	UUUUUUUCU	NA	NA
1642812	+	4	rpoZ+46nt	GCACAAGUA	GUAGCAACCUAUAUCAUGUAGGUUGUUAU	UUUUUUCCG	NA	NA
1654707	+	0	rpe+50nt	UUUAGAAAA	GAGCUGGGCAUACAAUAGCCUAAGCUC	UUUUUCCUG	NA	NA
1655596	+	4	spoVM+74nt	CACAUAAAA	AAAACGCCUGCCACAUAUCGGGGCAGGCGUUCA	UUUUGUGUU	NA	NA
1660027	+	0	in recG CDS	AGUCGAAGG	GAAGGUUCAUUCAGAGCCUUC	UCUUACCUA	NA	NA
1665612	+	4	acpP+46nt	GAUGCUAAA	AAAAGUCCCGCCGAAACGCGGGGCUUUA	GCCCUUUAU	SI of NusG	-0.53
1666489	+	4	rnc+34nt	AACAAUAAA	AAAAUCCCCCUUAUGACUCAGGGGGAUUUC	AGUAUUAUG	NA	NA
1677410	+	3	rbgA+33nt	ACGAUGUAA	AAAGGCGCGCAGAAAUGCGGGUCUUU	AUUUUUUCU	NusG-dependent	7.64
1680145	+	3	ylqG+168nt	AAAAAAGCA	CAGGGGUCCCGAUUCAAGAAGAUCGGACCCUUG	UCGAAUUAA	NA	NA
1685767	+	3	topA+34nt	CAGAAGUAG	AGCGGUGAGCAGGGUCUUGCUCACCUUC	UUUGUGGUG	NA	NA
1719733	+	4	tsf+81nt	UCAGGCAGU	AGUAUAGGGGACACAUUUUGUGUUCCCUAUUUU	UAAAAACUA	NA	NA
1721147	+	4	frr+68nt	AGUGAAAAG	AAGACCCUCUCAUGUUUACAGGGGGUUUU	UUUGUUUAA	NA	NA
1727104	+	2	proS+82nt	AAUAAUAGA	AAGGUACCUCAUUGCCUGAGGUACCUU	CACUUAUGA	NA	NA
1736845	+	4	rbfA+45nt	UAAAAAAAG	AAGAGAGGAUAGGCGUAUAUCGUCUGUCCUCUUUC	UUCGUGUUU	SI of NusG	8.41
1741543	+	1	pnpA+44nt	AAACAUAAA	AGGAGCCUGGGAGACCCGGCUUCU	UUAUUUUGU	NusG-dependent	7.38
1747097	+	0	asd+66	CGAAUAGAA	GAGAGUAAGGCGCUAUCAGCCUGCUCUC	UUCUGUUAC	NA	NA
1749304	+	1	dapA+65nt	GAAACAAAC	GCGGUCAUUCUCACAUUCAGCUGAGUUUGACCGU	UUCUUUUAU	NA	NA
1754660	+	2	spoIIIE+21nt	AUAUGAUGA	AGCUCUCUUCUUAAUGAAGGGAGUU	CCGCUUUUA	NA	NA
1867658	+	2	hfq+66nt	CAUGAGGAA	AAGGCUGUCGGGGGUUCCCGGCGGCCAU	UUUUAACCA	NA	NA
1867724	+	4	hfq+134nt	UGUGUAAGC	AGCUGACCAUGCCAAGGCACGGUCUUUU	UUUAUUGAG	NusG-dependent	6.64
1872096	+	0	nrdF+18nt	GAUGAAAAA	GAGCAGAUAUAAUAUCUGCUC	UUUUCGGCU	NA	NA
1895189	-	2	yncB+191nt	UAAAAAACA	ACCCCUUCACGUCAAUGUGAGGGGUU	AUUUGUGGU	NA	NA
1917571	+	1	yndN+475nt	UCCUCCUAU	UCGGGCUCGCACCCAAAAGUCAGGGCGAGCCUGC	UUUUUUUGU	NA	NA
1919732	+	0	ynzC+40nt	CUAAUAUAA	GAGGAAUACGGCAAUAUCGUAUUCCUC	UUUUGCAUA	NA	NA
1940372	+	3	alsT+53nt	AUAAAACAA	AAAGCUGCAUUCAAUAGUUGAAUGCAGCUUU	UUCAUUUAU	NA	NA
2027850	+	4	yoaF+52nt	AAACAAAUC	AUCUGAGGAGAGCGAGAUUCAUUGUCACGCUCUCCUCUGUU	UAGCUGCUG	SI of NusG	1.35
2032888	-	3	exlX+42nt	AAAUACGAA	AAACAGCGGAUCUUUUCCCGCUGUUU	UUUCAAUAA	NA	NA
2049534	+	3	penP+84nt	UUAACUUCU	CUACCGUUCAUUUUUUGAUGAACGGUUC	UUUCAUUAA	NA	NA
2057583	-	4	yobF+1136nt	UAAUAAGAA	GAACGCCCCCAUAUGGGGGCUUGG	AUCUGCGUC	NA	NA
2069956	-	3	yobJ+291nt	UGGUUCUAG	AGGUAGGCCUAUCCCUUCAGGUUCUGAGGCUCAAGGGAGGUCUAUUU	UUUCUAUCU	NA	NA
2083043	-	4	yobV+28nt	AUAUAUGAA	GAAACCUGACACACUGCUGUCAGGUUUC	UUUGUAUCU	NA	NA
2086033	+	3	yocA+56nt	ACUGACAAA	AAAGCCCAAAAAUGAAUUUGGGCUUU	UGCCAUGUU	NA	NA
2086043	-	3	yozB+30nt	AUUAUUAAA	AAAGCCAUACUCAGUAUGGCUUU	UUUUACGCA	NA	NA
2088609	+	1	in yocD CDS	AAAAUUCUG	UGCGGUUAUUCCGAUAUAACCGCU	CUUUGCAAC	NA	NA
2089267	+	3	yocD+36nt	ACAUUAAUC	UCAGCUUGUAAAUUUUUUUACAAGCUUU	UUUAGCCGC	NusG-dependent	12.15
2096309	-	4	yocJ+45nt	AUAAAGCCA	CCAAGACUCCUAUCGUUACAAAUAGGAGUCUUUU	UGUAUUAUG	NA	NA
2099356	-	3	yocM+93nt	AUAAAAACA	CAAGAACAGGGCAUGUGCGCCCUGUUCUUA	UUACACCCA	NA	NA
2099402	-	0	yozO+44nt	GAUGAGCCA	GCCGUUCAAAAAAUGGUUAGGC	UUUUUUUAU	NA	NA
2104900	-	4	yocR+38nt	AACACACGA	CGAAGCCCCCGAGGAAAGGGGGCUUUU	UUUAAUAAU	NA	NA
2111813	-	1	yojO+25nt	CUUCAUAAA	AGCAUAGGAUAGCCCUUAAUCCUAUGCU	UUUUGGCGG	NusG-dependent	4.86
2134525	-	3	yodJ+44nt	AAAAUGAAA	AAAGCCCGCUUACACUAGAUAAGCGGGCUUC	AUUGUGUGU	SI of NusG	7.64
2135427	-	4	deoD+47nt	UAUAUCAAG	AAGAGGCGUGCUGGGUGCCGGCAGCCUCUU	CUUUACGUA	NusG-dependent	13.01
2158729	+	4	yosU+49nt	UACAUAUAU	UAUAGGAGGUGGGAAAUUACCCACCUUCUUUA	UUGGAGAUA	NA	NA
2186958	-	2	yorD+29nt	ACUAACAAG	GAGUCCCUUAUUGGGGCUU	UUAAAUUUA	NA	NA
2187779	-	1	yorB+41nt	UAAGGCAAU	GCUGGGCUAGUCUCUAAGAUUAGCCUAGU	UAUCAUACA	NA	NA
2195566	+	3	yoqO+22nt	GAAACCUAA	AACGGUAAAGAGUGUUAAUUCCUCUUUGCCUUU	UUUAUGUGC	NA	NA
2204149	-	1	yopR+44nt	AAAUAUGAA	AUCCAUUUGACUAUUUUGGUUAAAUGGAU	UUUUCUUUU	SI of NusG	6.64
2210279	-	4	yopJ+56nt	UAGAAGAAC	AACACAAUGAGGUUUAGUCCUCAUUGUGUC	UAGUUAAUU	NA	NA
2212728	-	1	yopD+356nt	UAAACAAAA	AGAGCAUUACACUAAAUGCUCU	UUUUCAUGG	NA	NA
2219231	-	4	yonU+54nt	UAUAAAUAA	UAAGGGAGCGGUAAGGCAAUUAUCGUUCCUUAU	UUUUCGCUU	SI of NusG	8.76
2220307	-	4	yonS+32nt	UUAAAAACA	ACAAGCCCUAUUUUGGGGCUUUU	CUUUAGAUU	NA	NA
2228715	-	4	yonR+45nt	CCUAAUUAA	UAAAGAAGGCCUAAUAGGAGCCUUCUUUA	AUUUAAUAA	NA	NA
2269480	-	4	sunA+45nt	AACAUUUGU	UGUAGAGGGAAUAUUUUAAAUAUUCCCUCAUAU	UUAAAAAAU	NA	NA
2288660	+	0	ypoP+41nt	UGAAAAAAA	GCACAUACCGAUAUAUAGGUAUGUGC	UUUUCGCAG	SI of NusG	12.48
2302692	-	4	ypgR+39nt	AGAUAAAAA	AAAAGGUGCAGAUCAUGCACCUUUU	UUAUGGUGU	SI of NusG	8.97
2308131	-	4	degR+30nt	AAAUCAAAU	AAUAGGAGAGGCGAAUGCCUCUCCUCUA	UUUGUCUGU	NA	NA
2308164	+	2	cspD+61nt	GACAAAUAG	GAGGAGAGGCAUUCGCCUCUCCUA	UUUGAUUUU	SI of NusG	12.68
2318103	-	4	pbuX+28nt	AGCAGUCUA	CUAACUCCGCCGCGGCGGAGUUUU	UUUUGACGU	NusG-dependent	6.64
2330042	-	0	ypsC+33nt	GCAUAAAAA	GAAGACGCUCUGCAUGCGUCUUC	UUUCAUCUU	NA	NA
2331269	-	4	rnpB+65nt	AUGAAAACA	ACAAGCUCUCCCGUAUAAGGAGAGCUUUU	AUCUUAGUU	NusG-dependent	-1.7
2344227	+	3	ponA+42nt	AAACAAAAA	AAAGCCGUCACCUUUGGGGUGAUGGCUUU	UUUGGUUAC	SI of NusG	11
2347620	-	1	aspB+41nt	AGAUCAAAA	AGCGGCUGACAGAAAAGCCGCU	UUUUAUCUU	NA	NA
2365697	-	0	ypiB+39	AUAUGACCA	GCCUUGCAGUGAAUUGCAAGGC	UUGUUGCCG	NA	NA
2367931	-	3	aroE+26nt	UUCGAAAAA	AAAUCCUGAAGUUUUACUUCAGGAUUU	UUUAUGCGU	NusG-dependent	2.87
2370387	-	0	hisC+28nt	AUUUUAUAA	GAGGUGAUCAAAUAUCACCUC	UUUAGUCUA	NA	NA
2377481	-	4	aroH+155nt	GUUUAUUCU	UCUACCCAAAAGAAGUCUUUCUUUUGGGUUUA	UUUGUUUGU	NA	NA
2381222	-	1	ndk+133nt	AGGGUUGAA	UGGCAGUGUGCAUCAGACCUCUGCCU	UUCCCAACG	NA	NA
2394473	-	3	rpsA+194nt	UCCACAAAA	AAAUCGGCGAACUUUCAAGCAGUUCGCCGAUUU	UUAUCAACU	NA	NA
2400178	-	0	prsW+30nt	AGUAUAGAA	GCCGCACAGCAACCGUGCGGC	UUUUUUGUG	NusG-dependent	6.32
2402009	-	1	gudB+59nt	AAAUAAAAA	AUCUCCUAUGAUAAAAUAGGAGAU	UUUUUUAUU	NA	NA
2410651	-	0	ypzE+44nt	UUCGAAACC	CCGCUUUUAUAUAUGAAGCGG	UUUUUUUAU	NA	NA
2413557	-	2	rsiX+30nt	AAACUAAAA	AAGAGCCCUUUAAGGCUCUU	UUUUAGUUU	NusG-dependent	6.64
2424620	-	4	ypuI+38nt	AUAACGUUU	UUUACUCUCCCUUUUUCAGGGAGAGUUUU	UUUAUGUAU	NA	NA
2431375	-	3	BSU_misc_RNA_36-32nt	AAUACCUAA	AAAGCCCCGAAUUUUUUAUAAAUUCGGGGCUUU	UUUGACGCA	NA	NA
2431427	-	0	ribD+46nt	AUGAUGAGC	CGCUAUGCAAAAUGUUUAAAAAUGCAUAGUG	UUAUUUCCU	NA	NA
2449794	-	2	fur+49nt	CGAGCGCGA	AACCUUUUCUCAUGGGGAAAGGGUU	UUUUGCUGU	NusG-dependent	13.98
2457515	+	4	ansR+179nt	AUGAAGAAC	AACAGCCAUUUCUGUUCCGAAGGCUUUU	UUUAGGUUU	NA	NA
2461577	-	2	yqkC+46nt	ACAUAAAAA	AAGCGAAAGAGCCGAAGAGGCCUUUCGCUU	UUUUAUUCU	NA	NA
2473125	+	4	yqjU+4967nt	GUACCGCGA	CGAACCUUUUCGUCCUUUACGUGAUGAAAAGGUUUU	UUGUUUUGU	NusG-dependent	13.45
2485636	-	3	yqjE+47nt	AAAAAGAAA	AAACCCGAGUGCGAUUUCCCGCAUCGGGUUU	UUUUAGUCG	NA	NA
2507292	+	4	yqzF+40nt	CUGAAAAAA	AAAAGCCGGAGAAUGCUCCGGCUUUU	UUUGUUUGC	NA	NA
2517598	+	2	yqiG+42nt	AAUGUGCAA	AAGACUGCCGAAACGAUUCGGCAGUCUU	UUUUCCCCU	NA	NA
2522847	-	4	yqxC+28nt	CAGAUGUAC	UACCGGAAUAAUAGGGCGCUAUUAUUCCUUUU	UUCUGCGUC	NA	NA
2528308	-	4	folD+100nt	ACGAUACCC	CCCGCUUCUUCAGGCUCCUAAAGCCAGGGCGGGUUUU	CUUUAGAUU	NA	NA
2529879	-	4	yqhY+51nt	UAACACGAA	GAAACCAAGGGGAGGGCGGCCCUUUGGUUUU	UUUACCACA	NusG-dependent	9.28
2538069	-	0	efp+46nt	AAAAAAGAA	GUCUGUUCCCAAAUGGGAGCAGGC	UUUUUUUGU	SI of NusG	7.45
2542509	+	4	yqhP+71nt	CGUCUUUUA	UUACCUAGCUCAAUCAGGGCUAGUUUU	UUUUGGUUG	NusG-dependent	9.1
2543407	-	3	mntR+36nt	UCAGUAAAA	AAAGGCGGUCUCGAAGGAGGCCGUCUUU	UUUGAUAUA	NA	NA
2545374	-	0	gcvPB+36nt	AAAUAAAAA	CAGCUGUCUACCAGACAGCUG	UUUGCUUUA	NA	NA
2549376	-	1	BSU_misc_RNA_38+130nt	UCAGGUGCC	AGGACAGAGAACCUUCAUUUUACAUGAGGUGUUUCUCUGUCCU	UUUUUGUAU	NA	NA
2564885	+	4	yqgY+6nt	UUUUUAUUA	UUAUGGUGCCCGGCGGCGGAGGCCAUUA	AAUGCGCAG	SI of NusG	-1.47
2565883	-	0	yqgV+37nt	AAAAAUAAA	CCUGUAUCCGAUCGGAUACAGG	UUUUAAUGU	NA	NA
2587898	-	2	yqgA+100nt	AAUUCUGAA	AAGCUAGGUGCCCUAUUGGUACCUGGCUU	UUUAAAUUA	NA	NA
2590280	+	2	ispG+26nt	AACACAAAA	AAGCUUGACGGGAACCCGUCAAGCUU	UUUUGUGGU	NA	NA
2591382	-	0	zur+46nt	UAUGAAAAA	GGGGCCCGGUUUGGGCUCC	UUUUUCAGU	NA	NA
2593250	-	2	yqfS+33nt	CAAUAAAAA	AAUGGGGGAUAACACCCCCAUU	UUUUAGCUC	SI of NusG	6.91
2605682	-	0	glyS+48nt	GAGAGAAAA	GGCGGUUGCUGUGUGAUCGGUAAUCGUC	UUUUCCCCA	NA	NA
2614456	-	3	phoH+43nt	UAAUGCUGA	GAAUGACCCGAUCGCGCGUUAUCGGGUCAUUU	UUAUGAAGU	NA	NA
2619865	-	4	yqeY+49nt	CAAAGAAAA	AAAGGACAUCUUUCUAAGAGAGAUGUCUUUU	UUUAUCAUA	SI of NusG	7.5
2630876	-	3	lepA+37nt	AAUAGAAGC	GCCGCCGCAGUCUUGUACUGCGGCUUC	UUUCUGUGU	NA	NA
2637544	+	4	yqzM+45nt	CGACUGCCC	CCCGGGCUGCUGAUUUCUCGGCAGUCUUUU	UUAGUAGUU	NA	NA
2647710	-	3	yqeF+213nt	CCCUUUAAA	AAACACCUCUUUUUAGGGGUGUUU	UUUGCUGUC	NA	NA
2652386	+	3	yqeB+35nt	UGUAACAAC	ACAGAGGCUCAAGAAAGAGCCUCUUC	UUUACUCUA	NA	NA
2653343	-	4	nucB+32nt	AACGUAUUA	UUAAAGAGGGGUGUAUGCACCCCCCUUUUG	UAAUUUUAA	NA	NA
2678426	-	3	yqbO+719nt	AAAUAUAAA	AAAGCCAGAGUGUGGCAGCACUCUAGCUUU	UAAAAAAAA	NA	NA
2678878	-	0	yqbM+264nt	UAUUUAGGA	UAGACUUUACCCUUUUACUUUGCCGAGCUCAAGGGGUGGGUCUA	UUUCUUCUU	NA	NA
2691467	-	4	yqaO+1182nt	GGAAAGCCU	CCUGCGGACACUGAACUUACAGUAUUACGCUGUAUGUUUGGUGUCCGUUUU	UAUUUUUUA	NA	NA
2692616	+	4	yqaP+49nt	CAUCCAAGC	AGCCGAAGGAGGAGAUAUCCUCCUUCUUGU	UUACCCCUU	SI of NusG	5.59
2699396	+	1	yqaE+154nt	CCUUUACAA	ACCCUUACGUGACAAGGGU	UUUUGUUGU	NusG-dependent	6.64
2713919	-	2	yrkD+32nt	CCGAUAAAA	AAUUCAUCAACCUAAGGUUGACGAAUU	UUUAUAUUU	SI of NusG	-0.15
2714764	-	1	yrkC+170nt	GAUAAAUAA	AGCCGAUUUAAAAUUAAAUCGGCU	UAUUGCUUU	NA	NA
2718881	-	4	bltR+82nt	GAUGCUUAA	UAAAGCCUGAGAUGAAAUUUUCAUCCAGGCUUUU	UUAAACAAA	NA	NA
2732919	-	4	yrdC+65nt	AAAACGGCA	GCAGGCGCCUUUCCAAUAGGAAGGGCGCUUUA	AUUCGGCUU	NA	NA
2747792	+	4	yraM+85nt	CGUUAAUAG	UAGAUGGAUUGAAUGCGCCUUCUUGCACAGAUCCAUUGU	AAUCUCUUG	NA	NA
2758041	+	2	yraA+42nt	AUAACAAGA	AAGGCACAGACUGUUCGGGUCUGUGCCUU	UUUUAAAAU	NA	NA
2769712	+	3	yrhO+61nt	ACCCCAAAA	AAACAAGGCUUGUACAAAACAAGCCUUGUUU	UUUUAUUGC	NA	NA
2773885	+	0	yrhK+239nt	GCAAAGCAA	UCCCGCCAAUCAGAUUGGCGGGA	UUUUAUAUU	SI of NusG	-0.34
2779106	-	4	yrhG+360nt	UUUUUAUUU	UUUGCCCGCGGCAGAAGGGUUGUGCCGCGGGUUAU	UUCGCUCGC	NA	NA
2779143	-	0	yrhG+319nt	CGCAACUCC	CCGCAGGCAGUAGAGGCAUUGGUGUCUUCUUUUGUCUGCGG	UUUUUAUUU	NusG-dependent	-1.46
2780316	-	3	yrhF+212nt	AUACAAGUU	UUAGGCAGCAUUCAAACGCCUGGUUUGACACAGGUUAUUUGAGUGCUGCCUUU	UUUAUUUUA	NA	NA
2781172	+	0	yrhK+7526	AACUAUUCC	GCCAUGUGUGUUUACACCUUCUUAGAAUUAAGGGCAGGUGUAUCUAUACAUGGC	UUUUUUUGA	NA	NA
2795858	-	4	yrrL+33nt	AGAAAUAAA	AAAAGGAGAGCAAAAAGCUCUCCUUUU	GUUCGUCGC	NA	NA
2800854	-	2	yrrI+289nt	CCGCGAGAC	CAGCUCUCGUCCCUGUGUAAACGUUGGUUUGCAUAGGGGGAGGGCUU	UUUUGCUUC	NA	NA
2809374	-	3	mnmA+42nt	AGAUGAAAA	AAACCUCAACACUGAGUUGGGGUUU	UUUAAUAGU	NA	NA
2814489	-	0	yrvM+1nt	UGAGAGCGG	GUUCAAAACAAAGGAAAGCUGCAACGGCACUAUUGGGAC	UUUAUUUUU	SI of NusG	-0.06
2822851	-	1	apt+51nt	UAACGAAAA	AGCACUCCAUGUCAGGGUGCU	UUUUUCCUA	NusG-dependent	6.64
2826861	-	4	secDF+43nt	UAAAAAAUA	AUAUCAGGCUGUCCUCUGCAGGGCAGCCUGUUUU	UUGAAAAGU	NA	NA
2851255	-	3	pheA+31nt	UAUAAAAAA	AAAGCCCACUAGAGGGCUUU	UUUUAGCUG	NA	NA
2852614	-	3	obgE+50nt	UGGCUGAAA	AAAGAGAGCCUGGUGCCAGGCUCUCUAU	UUUAAAGAA	NA	NA
2854838	-	4	rpmA+46nt	AUUCAAAAA	AAAACUCCGGUCGAUGAUGACUGGAGUUUU	UUUUGACGU	SI of NusG	7.59
2857718	-	4	minD+62nt	AAGAGAAGA	AGAAUCUGACAAAGCAUAUGCUGUGUCAGGUUUU	UUUUGUUUG	NusG-dependent	6.51
2865265	-	4	folC+51nt	CAUCCGGCU	GCUCCGGCAGAAUCAAAAAAAGAUUCUGCCGUUUU	UUUCAUACU	NA	NA
2866622	-	4	valS+46nt	GAAAAGCCG	CCGGGGCGGUUUCUAGAGAAACCGCCUUGU	CUUAUAAAU	NA	NA
2872836	-	3	hemL+47nt	AGAGUGAAA	AAACCGGUAUCAAGGACUCCUUGUGCCGGUUU	UUUCGUCGU	SI of NusG	6.64
2877626	-	0	hemA+140nt	UCUUCAACA	CAACCGGAAGGCUGGAAAAAUGGCCUUCUGGUUG	CUUUCUAUU	NA	NA
2879860	-	4	engB+26nt	AAAUGAUAA	UAAACCGGUAGAGGAUCCUCUACCGGUUUU	AUUUAUAUU	NA	NA
2884735	-	4	clpX+50nt	UAAGCACAA	CAAACCUCCUGAGUGGUAACACUCAGGAGGUUUU	UUUGCACGU	NA	NA
2886254	-	4	tig+65nt	AAUAAAACA	ACAGGGCGCGAAUCAUUCGUGCCUUGU	UUUGUAACA	NA	NA
2897043	-	3	BSU_misc_RNA_45+54nt	GCCUUUUCG	CGCCCCUUUUAGCUAUCGCAGUUACUGCGCGGCUGAUUGUGGGCGGAAGGGCUU	UUUUUAGUU	NA	NA
2899769	-	3	trnSL-Arg2+50nt	AAAAGAAAA	AAACCUCAAAUCCAUUUAGGAUUUGAGGUUU	UUUGUUGUU	NA	NA
2903183	-	4	racE+38nt	GAUAGUUUU	UUUCCCCGCAACGGUAUGUUGCGGGUUUU	UUUCUUGUC	NA	NA
2904686	-	4	gerE+45nt	UUAAUCCUU	CUUGCCGGUAUUCCUUCUUUUGGAAGGAGCCGGUUAU	UGCUGGUCG	NA	NA
2905531	-	3	sdhB+43nt	GAAGAAAAA	AAACCUCUUCCGCAUGGGAGAGGUUU	UUUUAAACA	SI of NusG	7.64
2909476	-	0	lysC+44nt	AAUCAAAAA	GGCGGGACUAUGCAGUCACCGCC	UUUUUGAUU	NusG-dependent	6.64
2910809	-	4	uvrC+311nt	UAAUUGAUA	AUAAGCAAUGAGAGUAUUCCUCUCAUUGCUUUU	UUUAUUUAU	NA	NA
2925067	-	4	yshB+37nt	CAUAAAAAA	AAAACUUCUCUUGUCCGGAGAAGUUUU	UUUCAUGAA	NA	NA
2970884	-	3	coaE+41nt	AUACAAAAA	AAACACCGUUCAUAUUGAACGGUGUUU	UUUGGCCCG	NusG-dependent	6.64
2975942	-	4	phoR+130nt	CAAUUUUGA	UGACGGCGGGAACCUAUUUGUGUUCCCGUCCUUU	UUUGUGUGU	NA	NA
2984747	-	3	pyk+44nt	AGGUGAAAA	AAUGGAAGGGGAAUCCCUUCCUUU	UCUCUUAUU	NA	NA
2987696	-	2	accA+37nt	ACUAAAUAA	AACGUGAAGCCUUUGGCUCACGUU	UAUUUUUGU	NusG-dependent	6.91
2989844	-	3	accD+59nt	CCAAAAAUG	UGGCAGCGCGUUGGCGGAGACCGGCGCGCUGUUC	UCAAGUGAA	NA	NA
2995921	+	0	ytzJ+31nt	GAACACUAA	GAGAGAGGGUCUCCCCUCUACUC	GUGUUCUUU	NA	NA
3011529	-	0	ytzD+26nt	GCAGAAUAA	GCUGUCUGUACAGGCAGC	UUUUUUUGU	NusG-dependent	5.56
3015072	-	3	ackA+42nt	UCGCAUGAA	AAAGCACAUUCUCUUGAAUGUGCUUU	UUUGUUGUU	NusG-dependent	15.01
3017654	-	3	tpx+45nt	AGGGAAAAA	AAAGCUCCAGGCUGCCGCCGGAGCUUU	UUUCAUGGU	NA	NA
3036375	+	4	rpsD+47nt	GUUUUAAAA	AAAACCCCUGCCGCUAUGCGGUCGGGGUUUU	UUUAUUCGG	NusG-dependent	6.75
3037899	-	1	ytzK+162nt	GAUAAUCAA	UCGUCCCUUCGUGUAAACGAAGGGGCGU	UUUUUAUUA	NA	NA
3044115	-	4	ccpA+54nt	AAAACAAAG	AAGAGCAAGCUUCACCUUUAUGGUGAAUUCUUGCUUUU	UUCAUGGUA	NA	NA
3045406	-	4	aroA+43nt	CAAUCCAAA	AAAAGGCCGCGCCUGCGGCCUUUU	UUUAUCGUA	SI of NusG	9.25
3048145	-	3	murC+35nt	AUAAUAAAA	AAAGCAGUGAUCUCACUGCUUU	UUAUUUCUA	NA	NA
3052671	-	3	ytpR+75nt	CAUGUGAAA	AAAGCCGCUAAGCCCUUGUUUAGCGGCUUU	GUUUCUGUC	NA	NA
3055245	+	3	ytoQ+56nt	UAAGAAAAA	AAAGCUUGUCGAUCCGGGCUUACUGCUCGUUCAACAAGCUUU	UAUGAACCU	NA	NA
3060290	-	2	ytmP+386nt	CAUGGGAAA	AGGAGUGUUCCAGCAGACGGGACCCUCUU	UUUUUAUGU	NusG-dependent	8.64
3072700	+	1	ytzE+79nt	CGAUAGAUA	ACAGGGCGAAGAAACUACUGAGCCUUGU	UUUUGUGUU	NusG-dependent	4.42
3105133	-	3	ytvB+340nt	AAAACGAAA	AAGUCUCUCGUCCCUUUUUGGGAUGAGGGAGUU	UUUUUUAUU	NA	NA
3121522	-	3	ytpB+19nt	AAAGAAAAA	AAAGCUCAAAUCAUUUGCUGAUCUGAGCUUU	UUUUUCAGC	NA	NA
3129146	-	4	ytmB+2010nt	AAGACCAAA	AAACCCUUUCCUCGAUGGAAAAGGUUUU	UUUAUUUUA	NA	NA
3137034	+	4	ytzI+94nt	UGAUUGCUG	CUGGCAGCAUCGGCGUCUCCGACUUGGACUUUUAAGGUCGGCAUGCUAUGCUGUUUU	UUUGCGCUG	NusG-dependent	14.48
3137451	-	4	luxS+48nt	AAAUAGAAA	AAAGGACCUUUUUGCGCUUAAGCAAAAAGGUCUUUU	UUGUGAGUG	NA	NA
3142059	-	3	mntD+21nt	CAUGCAAAA	AAAGAAAGAGCUGGCUGAUGCAGCUCUUUCUUU	UAAUUAUUA	NA	NA
3146127	-	0	menC+111nt	UCGUUUGGA	CCGGCUGCUGACCCAGCCGG	UUUUUUUAU	SI of NusG	6.64
3179267	+	4	ytaB+15567nt	AGAUCGUAA	UAAAGCAGUGCGUGGAACUUUUCUCAUCCUUCCGCGUGCUGCUUUU	UUGUUUUGU	SI of NusG	15.62
3183216	+	0	yuaE+21nt	AGAUAGAAA	GGGCCUGAUUUAAUCAGACCC	UUUCUGCUU	NA	NA
3188374	+	2	yuaB+328nt	GUCUAUUAU	UCGGCCAUUCUUUGCAAUGGUCUU	UUUUGUUUG	NA	NA
3191798	-	4	lytG+49nt	AUGGUAAAA	AAAACCUUUUCAUUGAGCGAAAAGGUUUU	UAUUUACGU	NA	NA
3194419	-	3	trnSL-Ala1+39nt	UACCUUUAA	AAACCCUUAUUCGAUAAGGGUUU	UUUUGUUUU	NA	NA
3217452	-	0	yugP+44nt	AAGGAGGUG	GCCCCUUACCAUUUAUGGUAAGGGC	UUUUUUUGC	NA	NA
3219764	-	4	yugN+77nt	GUAUGUAAG	AAGAGGAGGGGAAAGCAUCGGCCCCUCCUUUU	UUUGUAUGU	NusG-dependent	8.23
3220691	-	3	pgi+43nt	AUGUGAGAA	AAAGCUGACUGGCAUUUGCCGGUCGGCUUU	UUAUAAAAU	NA	NA
3225136	-	1	yugI+43nt	CAUGAAAAA	AGCACCGGACAGGAAUGUUCGGUGCU	UUUGAUUUU	NusG-dependent	6.64
3225683	-	0	alaT+89	CAAUAAAAG	GGGGGAAUACUAGAAAGCCUUUGGUAUUUUCAGUUUACCCCC	UUUUUGCUG	NA	NA
3228403	-	4	yugE+32nt	CUUAAAAAA	AAAACCGGUUCAGCACCGGUUUU	UUUGUAUUG	NA	NA
3229990	+	3	patB+52nt	UAGCUGUAA	AAACGCCUUUACGUCUUCAUUUGUAAAGGCGUUC	UUAAUAAAA	NA	NA
3231811	+	0	kapB+26nt	CGGCCAUAA	CCCAGUCUGACAAAAGAUUGGG	UUUUUUACG	NA	NA
3253485	-	4	comP+48nt	UAACGGAAA	AAACGACUUGGCACAGGCCAAGUCUUUU	UUAUAAUAU	NusG-dependent	8.06
3257589	-	1	pdeH+449nt	AAAGCGAAA	AGGCCACAACUUUAGCGUUGCGGUCU	UUUUCGGUU	NusG-dependent	13.05
3259363	-	0	yueK+40nt	AAAGAAAAA	CUGGCCUUUCAUUCGCGAAGGGCCAG	UUUUCUUUA	NA	NA
3278246	+	1	yukF+24nt	AACUUCGGC	ACAUGGAUUUGUGAAAUUUCACAAAUCCAUGU	UUUUUUAUU	NA	NA
3294900	+	3	bioYB+31nt	UACGUAAAA	AAACCGUUCUAUUGGACGGUUU	UUUUAUCAU	NusG-dependent	6.17
3299313	-	4	yuiC+35nt	UUUAAAUGC	UGCCGCUUUCUUCUAAAGAAAGCUUUU	UUUAUGUAU	NA	NA
3305525	-	1	yutM+75nt	CUAUUACUG	ACGCUUUUCUUAGCGAUAAAUCAUCGUUAAGGGAGGCGU	UUUUAUUAU	NA	NA
3310762	+	0	yutI+41nt	AAUAAAGCA	GCCAGGCUGAUAUUUGAUCAGCCUGGC	UUUUUUAUU	SI of NusG	5.38
3312800	-	4	thrB+48nt	AUCAUGCCA	CCAAGCGUUCCUCAGCGUCAGCGGAGGGCGCUUUU	UUUUGCGUU	NusG-dependent	9.4
3317995	-	3	yutF+37nt	UUUGAAAAA	AAAGGGCGCCCUAAAAGGGUGCCCUUA	UUCUGUAUG	NA	NA
3320289	-	0	lipA+35nt	AUGCCAAAA	CGCCAGAUCAUCUGGCG	UUUUUGUCA	NA	NA
3360928	-	0	yuzK+46nt	UUUAAAAAA	GGGUGGGAAUCCACUC	UUUUUCUUU	NA	NA
3361730	-	3	metN+40nt	AAGACUGAA	AAACCCCGGAUGAGAAUUCCGGGGUUU	UUUUCGCGC	SI of NusG	6.81
3364345	-	0	yusD+273nt	UUUAUAUAA	GCCUUUCUGCUCAAGUGUGCAGAAAGGC	UUUUCUUUU	NA	NA
3365801	-	4	yusG+34nt	UGUUAAUGU	UGUUGGCGGUGAAUUUCACUGCCUUCU	UUUACACAU	NA	NA
3380665	-	1	yusY+40nt	UAAAGAAAA	AGCCGUGGCGUUAAAUGCCCCGGCU	UUUUCAAUU	NusG-dependent	6.64
3388983	-	3	fumC+44nt	AUAGGAAGA	GAACGGCUGCUUUUUAAGCAGCCGUUC	UUCUAAUAU	NA	NA
3426716	-	4	yvgN+37nt	AAUCAAAAA	AAAACUCCCCGUUAUGGGGAGUUUU	UUUAGGUGA	NusG-dependent	6.64
3436801	+	1	yvgO+8515nt	AGCACAUUC	ACCCAAUACCAAUCAAGGUUUGGGU	UAUUUAUAU	NusG-dependent	0.87
3436847	+	1	yvgO+8561nt	CAGAAAAAA	ACCGAUUUCACUUCGAAAUCGGU	UUUUUUGCA	NusG-dependent	6.86
3448231	-	4	yvaD+68nt	UGUAAUGAA	GAAGCAGAGACGGUAUAAGUCUCUGUUUU	UUUAUCUAU	NA	NA
3451817	-	4	rnr+50nt	AGCUCAACC	ACCAGCAAAUAGGGCCGCAGCGCUCUAUUUGCUUUC	UUUCGGGCU	NA	NA
3455048	-	3	secG+48nt	GUUUGUAUA	UAAGGUCUGAUGUGAAGUCAGGCCUUU	UUCACGUGC	SI of NusG	1.09
3464058	-	2	sdpI-808nt	ACUUAAAAA	AAGUUCCCAGAAUUGAAUUUGGGAACUU	UUUACGGGC	NA	NA
3466437	+	2	spbC+52nt	UUAUAAUUG	GAGUGUCUUGCGGAUUGCUCCGCAAGACACUU	UUUCAACCG	NA	NA
3476516	-	4	eno+43nt	AAUAAAAAG	AAGACCGCCGGGAUUUUCUCUCGGCGGCUUU	UUUAUCGUA	SI of NusG	9.47
3481599	-	2	gapA+101nt	AAGCGGACA	AAGGGAAGGGGACGGACUCCCUUUCCCUU	UUUCCAUGU	NA	NA
3483525	-	0	in cggR CDS	UUGACAGAA	GAGGGCUAUGAACUGCUUUC	UGUUUUGGA	NA	NA
3492758	-	0	yvbY+39nt	ACUCAGGAA	GCCCGGCAGGCAUAUGCCGGGC	UUUUUGCUU	NA	NA
3495837	-	3	yvfV+42nt	CCAUAUACU	CUGCACUCCUGGGAGAUCGGGAGUGUUU	UUGAUAAUA	NA	NA
3512469	-	4	yvfI+33nt	AUAAAUAAA	AAAAUCCUCCCUAGACGGGAGGAUUUU	UUUAAGGAA	NA	NA
3512503	+	3	yvfH+35nt	CUUAAAAAA	AAAUCCUCCCGUCUAGGGAGGAUUU	UAUUUAAUA	NusG-dependent	6.64
3535924	+	4	pnbA+3824nt	AAGCAGGCA	GCAAGACCUAAAAUGUGUAAAGGGCAAAGUGUAUACUUUGGCGUCACCCCUUACAUAUUUUAGGUCUUUU	UUUAUUUGU	NA	NA
3541439	+	1	yvdT+34nt	GCUUAAAAA	AUGACUGGGUAACACCGCUCAU	UUUUUAAUG	NA	NA
3545830	-	3	trnQ-Arg+62nt	CAACAGGAA	AAAGACAAGGGUUUGGCGAUUUGCCGCUCUUGUCUUU	UUUUGUGUG	NA	NA
3559982	+	3	yvdC+33nt	GCAUAAAAA	AAAGCGGCCGCGAUGGCCGCUUU	UUUUAACCU	NA	NA
3574319	-	0	cwlO+44nt	AUAUGACAA	GGGCCUUCUAUAAACAGAAGGCUC	UUUCUUUAU	NusG-dependent	0.88
3579636	-	1	yvzA+44nt	AACACAAAA	AUCUCCUAUUCAAACAAUGAGUGGGAGAU	UUUUAUUUU	NA	NA
3591269	-	0	yvoF+19nt	AUUGAAAAA	GUCCGCUGAAUAACAUCAGCGGAC	UUUUUUUGU	SI of NusG	6.64
3606730	-	3	yvlD+35nt	AAUAAAAAA	AAAGCUGCCCGCAAAGGCAGCUUU	UUUACAGUA	NA	NA
3615054	-	4	csbA+66nt	AGACUGAAU	AAUACCUGCUUUUACGUUUUAAAAGCAGGUUUU	UUAUACAUA	NA	NA
3620300	-	3	minJ+49nt	UCAUAAAAG	AGGCAGCCCGGCACCGCAGGAUGAUGCGAUGCCGGGCUGUUU	UGUGUUUGU	SI of NusG	9.19
3628256	-	4	secA+58nt	AGUUUACUG	CUGACCGCGGCGCCUGCAGGCGCCUGCGGAUCU	UUUAAUAAU	NA	NA
3630962	-	0	yvyD+41nt	GAAGAGAAG	CCUUCCGUGAUGUCCGCGGAAGG	UUUUUGUUU	SI of NusG	6.42
3636037	-	0	csrA+9nt	UCCGCAUUA	UCCUCACAAAAAAAGUGAGGA	UUUUUUUAU	NusG-dependent	0.42
3637312	-	4	flgL+30nt	UUUAAAGUA	GUAAGCGGCUCUUAGGAGUUCGCUUUU	UUUAUAUAU	NA	NA
3643629	-	3	yviA+38nt	UAAGGCCAA	AAAUCUCCGUUUUUAGAGCGGAGAUUU	UUUUAUUAU	NA	NA
3644566	-	4	degU+45nt	UAUAAUAGG	AGGAGACUUGCCUUUUACUAGGCAGGUCUUUU	UUUAGGGAU	NA	NA
3648619	+	3	yvhJ+41nt	UAUUAAAAA	AAAUGCCCGGUCCUUUUAGAGGAUCGGGCAUUU	UUGCGCGCA	SI of NusG	6.32
3676108	-	4	tagF+55nt	AAAAUGUAU	UAUAGCUGUCGAUUUUUCGGCAGCUUUU	UAGAUUAGA	NusG-dependent	7.91
3680508	-	2	tagD+75nt	UCUAAUUAA	AAGUACUUCUUAUUGAAAUAAGAAGUACUU	UUUGAUGGU	NA	NA
3683356	+	0	tagB+38nt	AAAUGAUGA	CACUUGUUCAAAACAGAACAAGUG	UUCUUUUUU	NA	NA
3684769	-	2	lytD+59nt	AAGUUGCAA	AAUAGGCUGUAGCUAUUAAAUAGCUACAGCCUAUU	UGAUUAUUU	SI of NusG	11.55
3695242	+	2	ywtF+37nt	GUAUAAUGA	AACGGGAUGGCGAUUACGCCAUCCCGUU	UUACAUAUA	NA	NA
3724386	-	4	ywqL+38nt	UCACGUGUA	GUAACACUUGGGGCUCUAAGUCAUCAAGUGUUUU	UUUUGAUGU	NA	NA
3738224	-	3	ywpJ+122nt	ACGGAAAAA	AAAGCUGGCUCUUUUAGAGCCAGCUUU	UUUAGUCUG	NA	NA
3740112	-	2	ssbB+96nt	UCAAAAUUG	GACCAGUCGACCAGACUGGUU	CUUUCUUUC	NusG-dependent	4.64
3740183	-	1	glcR+24nt	CCCUAAACC	CCGGGAAAAAGCUGCUGAUUGACACCCCUGCUCCUCCCGU	UAUCUAUCU	NA	NA
3741710	+	4	ywpF+122nt	CAUGAAAAA	AAAAGCUGCCGUUUUGAACGGCAGCUUUU	CUCUUCGUG	NA	NA
3747214	-	4	mbl+44nt	AUUUCACAA	CAAACCUCAUUCUGAAAAAGAAUGAGGUUUU	UUUAUAGUA	NA	NA
3761753	+	4	ywnG+57nt	GACAGGACA	ACAGGGCAUGAGUUCCAUAUAAACGGAACCAUGCCUAUU	UUAUUAUUU	NA	NA
3766159	-	0	ywnA+19	UGUUAUGAA	UCAUCUCUUUUAAUCAAAAGGGAUGA	CUUCUCACC	NA	NA
3770967	-	4	rapB+37nt	UGAGACAAA	AAAACCAUCUGCUGGCAGAUGGUUUU	UUUUUUAUU	NA	NA
3776691	-	4	ywmC+35nt	AGUAGAAAA	AAAAGACGCUCAUUGGGCGUCUUUU	UCUGUCCUU	NA	NA
3789146	-	2	glyA+46nt	GAUCCUAAA	AACCCGCUUGGGCUUAUGCCCGGCGGGUU	UUUUGACGC	NA	NA
3792893	-	3	ywlC+79nt	AUGUUCUAA	AACCCUUUUUGGACACGCAUAGGCUAAAAAAGCGGGGCGUGUCCAAGGGGGUUA	UUUAUGUGU	NA	NA
3795836	-	3	ywkF+37nt	UAAUAAAAA	AAAGGAAGCCUCUUAGGCUUCCUUU	UUUUGCACG	NusG-dependent	6.64
3803035	-	2	rpmE+48nt	GAUUUCUCA	AACAGGCAAGCAGCAGUCUUGCCUGUU	UUUUAUAAU	NusG-dependent	-0.32
3805054	-	0	glpX+36nt	ACAGAAAAA	GCGGGUGUGAGCCCGC	UUUAACUUU	NA	NA
3807705	-	0	ywjH+49nt	AUAAUGAAA	GGGGCGGCAAACAGCUUUAUGCCUGUUUGCCGCGGCC	UUUGUAUUU	NA	NA
3808461	-	1	fbaA+52nt	CUUUUUAUA	GCCGCCUGACAGCUUGACAGGCGGU	UUUCCGUCG	NA	NA
3847274	+	2	phrF+27nt	AAUGAUUUA	AACCGCCGUCCAUCGGCGGUU	UUUUCGUUC	SI of NusG	5.06
3848748	-	4	speE+42nt	UGAAGGUAU	UAUGGCGCAGGAGCGAAUCUUGCGCUUUU	UUACAGACA	NA	NA
3856711	-	1	mmr+307nt	GGAUGAUCA	ACACAUUCGUCCCUUUUAGAGGGAUGGGUGUGU	UUUUUUAUA	NA	NA
3858955	-	4	ywgA+48nt	ACCAUACCA	CCAAGCAAAAGAAAUGAUCCGUUUCUUUUGCUUUU	UUUAUGUUA	SI of NusG	8.87
3860953	-	4	ywfO+49nt	UUUUUUCUU	CUUAGCCUCGGCCCUCAGGUCAGGCUUUU	UUGCUUUCG	NA	NA
3882143	-	4	yweA+52nt	UUUGUAGUC	GUCAGAGACUGAGAUGUUUUCAGUCUCUUUU	UUUGUGUGU	NA	NA
3906102	-	4	sacT+44nt	ACCGCUUUG	UUGACUUGCAGGGAGUGAUCUCUGGAAGUUUU	UUUAUUUAU	NA	NA
3912297	-	4	rodA+39nt	UUGAUAUGC	UGCAGACAGCCUUUACAGAGGCUGUCUUUU	UUUGUGUGU	NA	NA
3926464	-	0	efeN+218nt	CUGAAAGAA	GCCUAAAUCGGC	UUCUUUAUU	NA	NA
3926654	-	1	efeN+29nt	AAUCAUAAA	AGAAGCCUUUACAGGCUUCU	UUCAGCGUG	NA	NA
3930657	-	3	thiE+53nt	CCUUCAAAG	AGGGCUGUUCUGUAAAAGGACAGCUUU	UUUGCUGUC	NA	NA
3937556	+	3	ywbC+44nt	UAAAAAUAA	AAAGAACGUACAUUUUGUGAUGUACGUUCUUU	UUUAUCCUA	NA	NA
3947135	+	3	ywaE+229nt	CGCGUGCAU	AUUGAGCCACGUCCCUUAUUGGGAUGGGCUCUUU	UUUGUGUGU	NA	NA
3950690	-	0	menA+36nt	AAUAAAAAA	GACCGCUCGUUUCAUGCGGUC	UUUUUUUGU	NusG-dependent	6.06
3957267	+	4	dltE+21nt	AAAUGAACA	ACACGCAGGAGAAUUAAUUUCUCCUGCUUUU	UUCAUAUAU	SI of NusG	10.4
3958519	+	3	ywaA+40nt	UAAGAAAAA	AAAGCCGGCCCAUUACAGGCCGGCUUU	UUUUACGCU	SI of NusG	10.1
3989911	+	0	yxkC+38nt	AGCUAACAA	GGGUGCCUGUUUAGGCACCC	UUGUUCUUU	NA	NA
3996345	+	2	pepT+40nt	AACGCCAAA	AAGCCAGUCCAAAAAAGGACUGGCUU	UUUUGUGGU	SI of NusG	6.64
3997141	+	0	yxjJ+49nt	AAACGAAAA	GGCUGCUGAAUCACGCAGCC	UUUUAAAAU	NusG-dependent	0.4
3999320	+	4	yxjH+227nt	UGUCACGCA	GCAAGCUCUUCCUUAUCCAAAGGAAGAGCUUUU	UUAUAUAUU	NA	NA
4022822	-	4	yxxG+236nt	UGAAGAUAA	UAAAGCUUGUAUCGAUAAGCGAUACAAGCUUUU	UUAGAAAGA	NA	NA
4035706	-	3	yxxE+287nt	GCAGGCAAA	AAACCUAAAUGGUGCAGGUGCAGGAGGAGACUCUCGCAAUCUGUGUCAUUUAGGUUU	UUUUAUCUU	SI of NusG	6.64
4035944	-	4	yxxE+50nt	CGAUUCAUA	AUAACCUUGAUUGGAAAAAAUGCCUUUCAAGGUUUU	UAAUUCAUU	NusG-dependent	6.64
4054197	-	2	yxeR+159nt	AAACAGGAA	AACCAAGCCUUGGAUCAAACGAUUCGGGAGGCUUGGUU	AUUUUGCCG	NA	NA
4068185	+	3	yxeB+40nt	AAUAAAAAA	AAACGGCACAGUCAUGACGCUGUGCCGUUU	UUUAUGGAU	NA	NA
4071236	-	3	yxdK-70nt	CCGCUUUGU	GUUUCCCCUUGAUAACAUGGAUUUAUGUCAAGGGGAUUU	UUAUGUGUA	NA	NA
4087811	+	2	yxcD+49nt	CUUAAUCAA	AACCUUACUCCGCGCGGGUAAGGUU	UUUUUAAGG	NusG-dependent	7.23
4102380	-	4	yxaL+53nt	AAUAGCAGA	AGAAGACCUUCUUUUAAUAAGAAGGUCUUCU	UACUGGUGU	NA	NA
4107334	-	0	yxaF+18	AGAAAAAAA	GGGUAGCAUUUUGUUAUCC	UUUCUCCUA	SI of NusG	3.32
4127457	-	3	yydF+44nt	GGGGUACAA	AAAGGAGAGUCUAACUCUCCUUU	ACCAUUGUU	NA	NA
4130386	+	2	fbp+344nt	CUCAAAAAA	AAGUCCAUUCUAUAUAACUCUCGCUAGGGUGGACCU	UUUUCAAAU	NA	NA
4141508	+	4	phrG+38nt	AAAUGAAAA	AAAACCCCCGCGGGAUGCGGGGGUUCA	AUUUAUAAC	NA	NA
4141676	-	0	argI+35nt	AUAAGAAAA	CCCCCGCACCCGCGGGGG	UUUCAGCGU	NA	NA
4147530	-	2	htrC+39nt	UUAAUAAAA	AGCAGUCUGGCAUCGUUGCCAGGCUGUU	UUGAUAUAU	NusG-dependent	1.91
4155129	-	0	trnY.Lys-5nt	AGGGUCGAA	GGUUCGAGUCCUUCAUGGCUCACC	AUUUCGUGA	NA	NA
4157441	-	4	dnaC+34nt	GGCGCAUAA	UAAGCCCCAAGAGCUGCUCUUGGGGUUUU	UUUCAUUAC	SI of NusG	6.64
4176887	+	0	yybJ+362nt	UGGAAUAAA	GAGUGCUUGCUGAAAAGCACUC	UUUUUCUGC	NA	NA
4179160	+	2	yybG+32nt	AAAUAAAAA	AAGGACCCGCUAACGGUCCUU	UUUUACUGA	NA	NA
4187629	-	4	tetB+56nt	AUGAGUGAA	GAAAGGAUCAAUCUUGUGAAAGUAAUUCAAGGUUGAUCCUUUU	UUGUAAAUG	NA	NA
4193246	-	3	yyaK+21nt	CAAAAAGUA	UAAGCAGCAAGGGUCUUAAUCCCUGCUGCUUA	UUAAUGUGU	NusG-dependent	3.27
4195743	-	4	yyaK+39nt	UGUAAUGAG	GAGAUCAGUGCGGCAGAUCCGCACUGACUUU	UUUAAAAAU	NA	NA
4197741	-	4	exoAA-20nt	UGAUGAGAU	GAUAGCAGUAAGGAUUUUACACUUACUGCUUUU	UUUAUAUAU	NA	NA
4203099	-	2	yyzM+27nt	UACUAGUCA	AAGCAUGAGGAGCCUACUUCAUAAAUAGGCCGACACUCAUGCUU	UUUCAUAUA	NA	NA
4204565	-	4	parB-125nt	UCUCUUUUU	UUUAGACUGCCGUAUUAGCAGUCUUUU	UUAUGUGUA	NusG-dependent	1.58
4205517	-	2	parB+41nt	AAUGAAAAA	AACCAUCUUUCAAACGAAGAUGGUU	UUUAUUUUU	NusG-dependent	1.74
4207866	-	1	noc+32nt	CAAAAUAGA	AGCUCUCCUGAAAAGCAGGAGAGCU	UUUUAUAUA	SI of NusG	6.64
4215226	-	4	rpmH+33nt	UAUCAGCUU	CUUAGGCCACUGAAUAAUGUCAGUGGUCUUUU	UUCACCACU	NA	NA

## Sheet: legend
Supplementary file 4. All intrinsic terminators identified by RNET-seq in the wild type strain.
Column A (Term-seq POT), genomic coordinate of the intrinsic terminator identified by Term-seq.
Column B (Strand), strand information of the identified intrinsic terminator.
Column C (Dist), the distance in nt of the RNET-seq 3' end from the Term-seq 3' end.
Column D (Relative Position), distance of the intrinsic terminator identified by RNET-seq from nearest upstream coding sequence and identity of coding sequence.
Column E (revised upstream sequence), nucleotide composition of the 9 nt upstream of the predicted terminator hairpin revised using the RNET-seq 3' end.
Column F (revised predicted hairpin sequence), nucleotide composition of the predicted terminator hairpin revised using the RNET-seq 3' end.
Column G (revised downstream sequence), nucleotide composition of the 9 nt downstream of the predicted terminator hairpin revised using the RNET-seq 3' end.
Column H (Classification), whether the terminators was classified as SI of NusG or NusG-dependent.
Column I (Log2FC), the log2 transformed ratio of the pause strength in the WT strain compared to the ΔnusG strain.
