# Supplementary material for: NusG is an intrinsic transcription termination factor that stimulates motility and coordinates gene expression with NusA
Source: eLife journal article supplement (doi:10.7554/elife.61880), 2021-04-09
Supplement: supp [file elife-61880-supp-v1.zip › elife_poa_e61880_Supplementary_file_5.xlsx]

## Sheet: NusA depletion
Transcript	baseMean	log2FoldChange	lfcSE	stat	pvalue	padj
ILL.aadK-BSU26790.74~928	419.864	-0.320335	0.21955	-1.45905	0.144551	0.226979
ILL.aapA-BSU27090.37~1425	1394.43	-0.736711	0.19373	-3.80277	0.000143086	0.000457344
ILL.abfA-BSU28720.1~1503	72.4832	-0.132763	0.371407	-0.35746	0.720747	0.802971
ILL.abh-BSU14480.27~305	1959.73	-2.20592	0.190957	-11.5519	7.22342e-31	1.94001e-29
ILL.abnA-BSU28810.1~972	11.887	-1.2783	0.84735	-1.50859	0.131404	0.210166
ILL.abnB-BSU39330.134~1543	45.3978	-1.58468	0.526697	-3.0087	0.00262366	0.00660869
ILL.abrB-BSU00370.67~357	4711.14	-0.0619436	0.228271	-0.271361	0.786114	0.853153
ILL.accA-BSU29200.1~978	9837.02	-0.269041	0.180756	-1.48842	0.136641	0.21703
ILL.accB-BSU24350.58~537	4055.03	-0.992527	0.189589	-5.23514	1.6486e-07	8.14649e-07
ILL.accC-BSU24340.12~1364	14744.5	-0.857226	0.187115	-4.58128	4.62136e-06	1.89247e-05
ILL.accD-BSU29210.335~1207	9883.26	-0.328531	0.18019	-1.82325	0.0682658	0.120764
ILL.acdA-BSU37170.1~1140	228.945	-0.0726404	0.255114	-0.284737	0.775846	0.845782
ILL.ackA-BSU29470.82~1269	32640.5	-1.19181	0.193903	-6.14644	7.92393e-10	5.22701e-09
ILL.acoA-BSU08060.1~1002	22.6384	2.8144	0.727281	3.86975	0.000108945	0.00035508
ILL.acoB-BSU08070.1~1029	30.7278	2.21665	0.608204	3.64458	0.000267827	0.00082605
ILL.acoC-BSU08080.1~1197	87.5166	0.883642	0.378482	2.3347	0.0195591	0.0406106
ILL.acoL-BSU08090.21~1397	122.133	0.647539	0.321035	2.01703	0.0436919	0.0825159
ILL.acoR-BSU08100.1~1818	638.645	-0.197169	0.242629	-0.812633	0.416428	0.538065
ILL.acpK-BSU17130.1~249	2.57064	1.04758	1.72188	0.608396	0.542925	0.654103
ILL.acpP-BSU15920.3~236	13808.4	-1.80864	0.262073	-6.90128	5.15342e-12	4.20405e-11
ILL.acpS-BSU04620.42~407	244.696	-0.478067	0.250493	-1.9085	0.0563263	0.102854
ILL.acsA-BSU29680.16~1734	3449.07	1.52498	0.195213	7.81191	5.63269e-15	5.5734e-14
ILL.acuA-BSU29690.23~655	1058.21	0.533782	0.242723	2.19914	0.0278678	0.0556012
ILL.acuB-BSU29700.27~671	1184.35	0.486677	0.225475	2.15845	0.0308929	0.0607286
ILL.acuC-BSU29710.1~1164	1679.01	0.40366	0.20102	2.00806	0.0446367	0.0840383
ILL.adaA-BSU01810.111~746	40.5562	-0.350208	0.477858	-0.73287	0.463638	0.583036
ILL.adaB-BSU01820.1~540	1047.43	-2.26603	0.418917	-5.40926	6.32855e-08	3.30491e-07
ILL.adcA-BSU02850.34~993	1248.19	-0.708318	0.258618	-2.73886	0.00616529	0.0142615
ILL.adcB-BSU02870.1~843	1023.83	1.11364	0.201757	5.51973	3.39524e-08	1.84772e-07
ILL.adcC-BSU02860.56~751	1098.32	0.800631	0.207848	3.852	0.000117157	0.000379452
ILL.addA-BSU10630.1~3699	3183.99	0.00471438	0.180126	0.0261727	0.97912	0.987958
ILL.addB-BSU10620.11~3511	1760.48	-0.177156	0.188841	-0.938125	0.34818	0.467556
ILL.adeC-BSU14520.13~1746	12314.3	0.663928	0.200932	3.30424	0.000952336	0.00264353
ILL.adhA-BSU27010.59~1108	281.715	0.67578	0.273234	2.47327	0.0133884	0.0289465
ILL.adhB-BSU26970.1~1137	9.23212	-0.0107597	0.981587	-0.0109615	0.991254	0.994621
ILL.adk-BSU01370.55~708	65432.1	-0.344506	0.268357	-1.28376	0.199226	0.297364
ILL.ahpC-BSU40090.345~908	18856.9	-0.735348	0.18047	-4.07463	4.60866e-05	0.000160856
ILL.ahpF-BSU40100.14~1543	44368.2	-0.563654	0.223895	-2.51749	0.0118193	0.0259336
ILL.ahrC-BSU24250.98~547	2333.67	1.75711	0.230572	7.62065	2.52396e-14	2.40532e-13
ILL.alaS-BSU27410.80~2716	12290.4	0.248652	0.219722	1.13167	0.257775	0.367387
ILL.alaT-BSU31400.1~1161	7036.18	0.521767	0.182612	2.85725	0.00427334	0.0102402
ILL.albA-BSU37370.1~1347	732.484	-0.24288	0.220529	-1.10135	0.270743	0.382806
ILL.albB-BSU37380.1~162	31.112	-0.145179	0.529227	-0.274323	0.783836	0.851351
ILL.albC-BSU37390.1~720	286.542	-0.160299	0.240816	-0.665651	0.505634	0.621013
ILL.albD-BSU37400.1~1311	352.491	-0.0546949	0.240946	-0.227001	0.820423	0.878858
ILL.albE-BSU37410.1~1161	151.807	-0.253145	0.287966	-0.879078	0.379359	0.501169
ILL.albF-BSU37420.5~1285	88.4505	-0.607033	0.363194	-1.67137	0.0946483	0.159456
ILL.albG-BSU37430.1~702	41.9192	0.374751	0.481283	0.778649	0.436187	0.556811
ILL.ald-BSU31930.15~1151	54218	2.25153	0.19901	11.3136	1.12333e-29	2.86796e-28
ILL.aldX-BSU39860.1~1338	247.737	-0.296786	0.255443	-1.16185	0.245298	0.352359
ILL.aldY-BSU38830.1~1458	36.9519	-1.13859	0.576768	-1.97408	0.0483724	0.0900327
ILL.alkA-BSU01800.26~937	431.063	0.0335399	0.239402	0.140099	0.888582	0.927477
ILL.alrA-BSU04640.20~1189	2401.05	-0.681577	0.190748	-3.57317	0.000352682	0.00105933
ILL.alrB-BSU17640.457~1641	22.308	-0.0130539	0.653189	-0.0199848	0.984055	0.990688
ILL.alsD-BSU36000.62~829	762.833	-0.0111602	0.200724	-0.0555998	0.955661	0.975713
ILL.alsR-BSU36020.21~929	341.043	0.152387	0.250853	0.607473	0.543537	0.654288
ILL.alsS-BSU36010.2~1714	561.693	-0.130819	0.207503	-0.630446	0.528403	0.640738
ILL.alsT-BSU18120.45~1442	6167.27	-1.87917	0.200287	-9.38238	6.45017e-21	9.56198e-20
ILL.amhX-BSU03010.50~1201	584.278	3.78615	0.283774	13.3421	1.3171e-40	6.26152e-39
ILL.ampS-BSU14450.14~1246	1989.93	-0.624088	0.253913	-2.45788	0.0139758	0.0300436
ILL.amtB-BSU36510.23~1237	88.949	-0.0812609	0.365358	-0.222415	0.823991	0.88125
ILL.amyC-BSU30290.1~831	35.4016	0.563467	0.525262	1.07274	0.28339	0.397325
ILL.amyD-BSU30280.1~912	31.3115	0.320679	0.56872	0.563861	0.572849	0.682699
ILL.amyE-BSU03040.1~1980	1610.15	1.00149	0.196148	5.10576	3.29463e-07	1.57533e-06
ILL.amyX-BSU29930.6~2162	2830.68	0.871934	0.185728	4.69469	2.67017e-06	1.12922e-05
ILL.ansA-BSU23580.146~1135	7878.47	-4.36933	0.191861	-22.7734	8.40972e-115	1.15942e-111
ILL.ansR-BSU23590.29~379	539.933	-3.11245	0.23648	-13.1616	1.45983e-39	6.42326e-38
ILL.ansZ-BSU02690.15~1142	82.1194	-0.269494	0.382388	-0.704766	0.480956	0.59949
ILL.antE-BSU25220.1~297	14.0829	0.428551	0.771878	0.555206	0.578754	0.686989
ILL.appB-BSU11390.87~1037	1613.13	5.01308	0.352432	14.2242	6.48009e-46	4.32285e-44
ILL.appC-BSU11400.1~912	1461.43	5.06797	0.361255	14.0288	1.03904e-44	6.05275e-43
ILL.appD-BSU11360.1~987	760.944	5.42143	0.374433	14.479	1.64407e-47	1.1724e-45
ILL.appF-BSU11370.1~990	5751.49	5.27629	0.331554	15.9138	5.08189e-57	7.00623e-55
ILL.aprE-BSU10300.27~1172	214.828	1.95409	0.409034	4.77734	1.77633e-06	7.73357e-06
ILL.aprX-BSU17260.30~1358	32.8678	0.646483	0.523035	1.23602	0.21645	0.318817
ILL.apt-BSU27610.6~518	3295.99	-1.55525	0.194088	-8.01312	1.11832e-15	1.15346e-14
ILL.araA-BSU28800.1~1491	128.071	-0.980049	0.328138	-2.9867	0.0028201	0.0070605
ILL.araB-BSU28790.1~1683	94.6711	-1.20285	0.363577	-3.30838	0.000938367	0.00261177
ILL.araD-BSU28780.1~690	33.2815	-0.716172	0.618747	-1.15746	0.247086	0.354228
ILL.araE-BSU33960.1~1395	77.6974	-1.67759	0.375998	-4.46169	8.13167e-06	3.20616e-05
ILL.araL-BSU28770.1~819	39.9352	-0.60447	0.498186	-1.21334	0.224999	0.328949
ILL.araM-BSU28760.1~1185	45.8564	-0.570276	0.475558	-1.19917	0.230461	0.335158
ILL.araN-BSU28750.1~1302	57.1945	-0.190519	0.437183	-0.435786	0.662992	0.75852
ILL.araP-BSU28740.1~942	25.5344	0.464965	0.575222	0.808323	0.418905	0.540758
ILL.araQ-BSU28730.1~846	13.3849	-0.258172	0.781665	-0.330285	0.741184	0.82073
ILL.araR-BSU33970.1~1155	1086.67	-0.5739	0.192558	-2.9804	0.00287875	0.00718992
ILL.arfM-BSU37290.1~477	3.21103	-2.66576	1.84544	-1.44451	0.148594	0.232798
ILL.argB-BSU11210.15~791	22.9691	2.5147	0.730576	3.44207	0.000577271	0.00167433
ILL.argC-BSU11190.19~1056	66.6502	1.10957	0.405452	2.73662	0.00620744	0.014343
ILL.argD-BSU11220.1~1158	26.3302	1.67966	0.609916	2.75391	0.00588872	0.01366
ILL.argF-BSU11250.1~960	65.0348	-0.497191	0.397257	-1.25156	0.210731	0.311725
ILL.argG-BSU29450.14~1225	514.277	1.07977	0.215275	5.01577	5.28207e-07	2.45744e-06
ILL.argH-BSU29440.1~1386	666.229	1.13863	0.24152	4.71443	2.42386e-06	1.02822e-05
ILL.argI-BSU40320.54~944	1733.37	-0.105621	0.222687	-0.474302	0.635285	0.735593
ILL.argJ-BSU11200.20~1240	77.8219	1.64615	0.388252	4.23991	2.23613e-05	8.27248e-05
ILL.argS-BSU37330.1~1671	9610.94	-0.70823	0.190152	-3.72454	0.000195671	0.000611249
ILL.aroA-BSU29750.140~1216	23485.3	1.03394	0.222514	4.64661	3.37432e-06	1.40687e-05
ILL.aroB-BSU22700.1~1089	8915.39	2.31212	0.211262	10.9443	7.07247e-28	1.6251e-26
ILL.aroD-BSU23080.86~853	1562.86	0.54671	0.204575	2.67243	0.00753049	0.0171888
ILL.aroE-BSU22600.1~1287	5268.9	-0.335266	0.233588	-1.43529	0.151204	0.236091
ILL.aroE-BSU25660.18~860	4772.23	0.106536	0.216824	0.491346	0.623182	0.725271
ILL.aroF-BSU22710.3~1175	8663.39	2.16528	0.197329	10.9729	5.15704e-28	1.19829e-26
ILL.aroH-BSU22690.1~384	3861.92	2.15682	0.20166	10.6953	1.07031e-26	2.32989e-25
ILL.aroK-BSU03150.117~677	724.042	-0.541414	0.264357	-2.04804	0.0405556	0.0772275
ILL.arsB-BSU25790.23~1063	258.384	-0.376392	0.271658	-1.38554	0.165889	0.254872
ILL.arsC-BSU25780.12~431	172.358	-0.363088	0.296771	-1.22346	0.221156	0.324247
ILL.arsR-BSU25810.11~328	87.2417	-1.14365	0.350322	-3.26457	0.00109631	0.0029989
ILL.artP-BSU23980.38~805	452.053	-2.97734	0.233988	-12.7243	4.33176e-37	1.7063e-35
ILL.artQ-BSU23970.70~729	185.057	-1.2557	0.272644	-4.60562	4.11235e-06	1.69917e-05
ILL.artR-BSU23960.1~723	363.383	-1.20861	0.252805	-4.78078	1.74618e-06	7.61034e-06
ILL.asd-BSU16750.57~1097	16190.9	0.755322	0.178392	4.23405	2.29521e-05	8.48346e-05
ILL.aseR-BSU05330.44~379	69.0575	-0.836037	0.378489	-2.20888	0.0271827	0.0543917
ILL.aslA-BSU39900.1~270	6.79324	1.52513	1.21961	1.25051	0.211115	0.311958
ILL.asnB-BSU30540.150~2048	20162.7	-1.14025	0.185401	-6.15017	7.74011e-10	5.1303e-09
ILL.asnC-BSU22360.1~1293	26980.1	-0.00451032	0.18219	-0.0247561	0.98025	0.988374
ILL.asnH-BSU39920.1~2244	171.838	-0.651654	0.302001	-2.15779	0.0309445	0.0608013
ILL.asnO-BSU10790.1~1845	45.0197	-0.967169	0.556507	-1.73793	0.0822235	0.14164
ILL.aspA-BSU23570.45~1472	12338.6	-4.25413	0.178516	-23.8305	1.61311e-125	3.3359e-122
ILL.aspB-BSU22370.23~1204	19325.6	-0.108452	0.200923	-0.539771	0.589355	0.695852
ILL.aspS-BSU27550.1~1779	4517.63	-1.58236	0.217055	-7.29015	3.09608e-13	2.72455e-12
ILL.atpA-BSU36830.17~1525	54723.1	-0.163463	0.189463	-0.862771	0.388263	0.51012
ILL.atpB-BSU36870.1~735	24853.6	-0.890259	0.197397	-4.50998	6.48326e-06	2.5933e-05
ILL.atpC-BSU36800.24~422	14233.5	-0.16303	0.225879	-0.721759	0.470443	0.588908
ILL.atpD-BSU36810.26~1447	54080.8	-0.184097	0.202998	-0.906891	0.364464	0.485327
ILL.atpE-BSU36860.46~258	9069.03	-0.866768	0.214338	-4.04393	5.25628e-05	0.000182536
ILL.atpF-BSU36850.4~516	17500.6	-0.392519	0.172922	-2.26992	0.0232122	0.0471772
ILL.atpG-BSU36820.1~864	27622.1	-0.221386	0.176919	-1.25134	0.21081	0.311731
ILL.atpH-BSU36840.1~546	17187.6	-0.317695	0.179169	-1.77316	0.076202	0.132332
ILL.atpI-BSU36880.271~654	6629.71	-0.709141	0.219241	-3.23453	0.00121843	0.00330455
ILL.azlB-BSU26720.1~474	228.745	0.782392	0.287023	2.72588	0.00641299	0.0148014
ILL.azlC-BSU26710.1~765	367.372	1.02818	0.229512	4.47985	7.46957e-06	2.96774e-05
ILL.azlD-BSU26700.1~333	153.699	0.994554	0.292523	3.39992	0.000674068	0.00192405
ILL.bacA-BSU37740.5~619	131.417	2.85941	0.475343	6.01546	1.79372e-09	1.12407e-08
ILL.bacB-BSU37730.1~708	241.626	2.65651	0.402533	6.59947	4.12627e-11	3.09171e-10
ILL.bacC-BSU37720.1~768	310.721	2.42565	0.363992	6.66403	2.6642e-11	2.04058e-10
ILL.bacD-BSU37710.1~1419	738.774	2.14463	0.280107	7.65647	1.91108e-14	1.82545e-13
ILL.bacE-BSU37700.1~1185	492.741	1.60709	0.337607	4.76024	1.93358e-06	8.3392e-06
ILL.bcd-BSU24080.12~1106	1805.84	-0.645312	0.19351	-3.33477	0.000853687	0.0024003
ILL.bceA-BSU30380.102~863	125.045	0.648739	0.311897	2.07998	0.0375274	0.0720248
ILL.bceB-BSU30370.1~1941	321.237	0.910853	0.271022	3.36081	0.000777147	0.00219705
ILL.bceR-BSU30400.61~756	493.886	1.05424	0.21872	4.82003	1.4354e-06	6.30905e-06
ILL.bceS-BSU30390.1~1005	869.53	0.935527	0.211614	4.42091	9.82852e-06	3.82776e-05
ILL.bcrC-BSU36530.9~590	1221.89	-0.671852	0.20136	-3.33656	0.00084821	0.00238815
ILL.bcsA-BSU22050.74~1171	15.1356	0.427685	0.741495	0.576788	0.564083	0.674528
ILL.bdbA-BSU21460.1~414	153.588	-0.722254	0.392003	-1.84247	0.0654063	0.116453
ILL.bdbB-BSU21440.1~447	219.727	-0.516051	0.358459	-1.43964	0.14997	0.234598
ILL.bdbC-BSU33470.5~421	2704.68	-0.679223	0.214077	-3.1728	0.00150975	0.00403121
ILL.bdbD-BSU33480.1~669	4407.46	-0.795198	0.199335	-3.98925	6.62827e-05	0.000226193
ILL.bdhA-BSU06240.263~1303	20559.4	-0.200101	0.180382	-1.10932	0.267292	0.378992
ILL.besA-BSU32010.59~928	1139.47	-1.7697	0.350859	-5.0439	4.56148e-07	2.15861e-06
ILL.bglA-BSU40110.14~1453	870.964	-1.02476	0.264357	-3.87641	0.000106008	0.000346709
ILL.bglC-BSU03410.1~1434	301	1.47028	0.241138	6.09725	1.07907e-09	7.01736e-09
ILL.bglH-BSU39260.23~1432	3471.23	-1.65505	0.295709	-5.5969	2.18222e-08	1.21804e-07
ILL.bglP-BSU39270.2~1831	3909.52	-1.28538	0.281552	-4.56535	4.98664e-06	2.028e-05
ILL.bglS-BSU39070.93~821	270.718	-0.277017	0.290124	-0.95482	0.339669	0.457911
ILL.bhlA-BSU21420.1~213	0.602571	-2.90277	4.5527	-0.637593	0.523738	NA
ILL.bhlB-BSU21430.1~267	1.84322	-1.67911	2.20547	-0.761339	0.446454	0.566596
ILL.bioA-BSU30230.1~1347	40.4326	0.471778	0.468358	1.0073	0.31379	0.428187
ILL.bioB-BSU30200.1~1008	24.666	-0.0297139	0.583922	-0.0508867	0.959416	0.978339
ILL.bioD-BSU30210.1~696	16.3777	-0.199581	0.698752	-0.285625	0.775165	0.845263
ILL.bioF-BSU30220.1~1170	29.4843	0.444845	0.539922	0.823905	0.409994	0.531245
ILL.bioI-BSU30190.69~1256	36.6829	0.310314	0.544743	0.569652	0.568914	0.679673
ILL.bioW-BSU30240.21~797	24.166	0.224903	0.623258	0.360851	0.718211	0.801111
ILL.bioY-BSU10370.12~572	15.5994	0.838768	0.74645	1.12368	0.26115	0.371558
ILL.bioYB-BSU32030.6~608	224.797	0.00727805	0.277412	0.0262355	0.979069	0.987958
ILL.bipA-BSU14770.10~1848	27832.1	-0.698823	0.218581	-3.19709	0.00138822	0.00373079
ILL.birA-BSU22440.1~978	1800.95	-0.367495	0.212234	-1.73155	0.0833531	0.143287
ILL.bkdAA-BSU24050.22~1014	1837.59	-0.966934	0.193732	-4.9911	6.00358e-07	2.76512e-06
ILL.bkdAB-BSU24040.14~997	2101.94	-0.899667	0.1838	-4.89483	9.83929e-07	4.41867e-06
ILL.bkdB-BSU24030.1~1275	3162.16	-0.924424	0.198225	-4.6635	3.10878e-06	1.30405e-05
ILL.bkdR-BSU24100.50~2128	1749.54	-0.8295	0.18465	-4.49228	7.04659e-06	2.81319e-05
ILL.blt-BSU26590.10~1212	52.2789	0.113156	0.459785	0.246106	0.8056	0.866795
ILL.bltD-BSU26600.1~459	27.8724	-0.458168	0.551285	-0.83109	0.405923	0.528121
ILL.bltR-BSU26580.4~825	92.1763	-0.693325	0.342034	-2.02707	0.0426556	0.0808541
ILL.blyA-BSU21410.1~1104	0.701999	0.64019	3.21867	0.198899	0.842342	NA
ILL.bmr-BSU24010.1~1170	966.231	1.3527	0.208759	6.47971	9.19006e-11	6.68016e-10
ILL.bmrA-BSU34820.53~1822	2322.89	-0.586028	0.190357	-3.07858	0.00207991	0.0054131
ILL.bmrR-BSU24020.4~840	295.733	1.29228	0.259416	4.98148	6.30991e-07	2.90298e-06
ILL.bmrU-BSU24000.12~905	7.16622	2.90783	1.27954	2.27255	0.0230532	0.0469003
ILL.bofA-BSU00230.66~329	143.052	0.903812	0.306825	2.94569	0.00322233	0.00794253
ILL.bofC-BSU27750.48~560	131.384	0.147054	0.306078	0.480447	0.63091	0.731756
ILL.bpr-BSU15300.63~4364	323.071	0.946184	0.242506	3.90169	9.55236e-05	0.000315816
ILL.braB-BSU29600.88~1425	2007.31	-0.987616	0.200354	-4.92934	8.25062e-07	3.74173e-06
ILL.brnQ-BSU26690.165~1487	816.693	0.905117	0.200216	4.52069	6.16376e-06	2.47028e-05
ILL.bsaA-BSU21900.124~606	138.206	0.0491504	0.36558	0.134445	0.893051	0.930392
ILL.bscR-BSU27170.172~756	178.99	-0.558263	0.298097	-1.87276	0.0611022	0.110069
ILL.bsdD-BSU03651.1~228	17.0382	-0.457227	0.686237	-0.666281	0.505232	0.620808
ILL.bsn-BSU32540.14~880	232.482	0.241501	0.267397	0.903156	0.366443	0.487177
ILL.BSU-misc-RNA-1-extra.1~213	2869.55	0.104788	0.346852	0.302113	0.762566	0.836598
ILL.BSU-misc-RNA-10-extra.1~103	7.25745	-3.34748	1.32546	-2.52552	0.0115526	0.0253888
ILL.BSU-misc-RNA-11-extra.1~108	17.2027	2.03169	0.969136	2.0964	0.036047	0.0693444
ILL.BSU-misc-RNA-12-extra.1~118	106.638	1.539	0.504596	3.04997	0.00228866	0.00589407
ILL.BSU-misc-RNA-13-extra.1~215	2068.73	0.0652262	0.291108	0.224062	0.822709	0.880571
ILL.BSU-misc-RNA-14-extra.1~109	21.5629	-0.42773	0.773244	-0.553163	0.580151	0.687466
ILL.BSU-misc-RNA-15-extra.1~121	15.761	2.62284	1.05587	2.48405	0.0129898	0.0281434
ILL.BSU-misc-RNA-16-extra.1~112	78.1276	-0.269772	0.726229	-0.37147	0.710288	0.795226
ILL.BSU-misc-RNA-17-extra.1~211	3741.84	1.32725	0.39146	3.39052	0.000697589	0.00198844
ILL.BSU-misc-RNA-18-extra.1~156	2328.46	4.10558	0.415315	9.88546	4.81359e-23	8.15943e-22
ILL.BSU-misc-RNA-19-extra.1~113	53.9787	-0.329931	0.802816	-0.410967	0.681097	0.77242
ILL.BSU-misc-RNA-20-extra.1~157	1416.32	3.33605	0.370539	9.00324	2.1916e-19	2.96224e-18
ILL.BSU-misc-RNA-21-extra.1~101	4.36444	5.38698	1.96239	2.74511	0.00604897	0.0140003
ILL.BSU-misc-RNA-22-extra.1~45	0.220375	1.07454	4.9953	0.215109	0.829682	NA
ILL.BSU-misc-RNA-23-extra.1~121	2.08363	1.42014	1.9535	0.726975	0.467241	0.585964
ILL.BSU-misc-RNA-24-extra.1~102	2.17916	-1.9807	2.10317	-0.94177	0.346311	0.465499
ILL.BSU-misc-RNA-25-extra.1~227	4360.18	0.387696	0.219188	1.76878	0.0769305	0.133411
ILL.BSU-misc-RNA-26-extra.1~117	102.329	-1.99326	0.439277	-4.53759	5.69018e-06	2.29606e-05
ILL.BSU-misc-RNA-27-extra.1~118	55.591	-2.64908	0.506816	-5.22691	1.72367e-07	8.48704e-07
ILL.BSU-misc-RNA-28-extra.1~115	90.4471	-3.12431	0.55819	-5.59721	2.17824e-08	1.21746e-07
ILL.BSU-misc-RNA-29-extra.1~106	7.30193	0.216361	1.03426	0.209195	0.834296	0.88705
ILL.BSU-misc-RNA-3-extra.1~141	3441.99	-1.37669	0.192062	-7.16796	7.61237e-13	6.49171e-12
ILL.BSU-misc-RNA-30-extra.1~42	0.521661	-0.424574	4.14389	-0.102458	0.918393	NA
ILL.BSU-misc-RNA-31-extra.1~92	0	NA	NA	NA	NA	NA
ILL.BSU-misc-RNA-32-extra.1~187	25068.8	-0.0775476	1.13702	-0.0682026	0.945624	0.969054
ILL.BSU-misc-RNA-34-extra.1~101	0.869203	-3.43538	3.31779	-1.03544	0.300462	NA
ILL.BSU-misc-RNA-36-extra.1~145	654.882	-0.801365	0.44407	-1.80459	0.0711387	0.124679
ILL.BSU-misc-RNA-37-extra.1~98	8.11728	-0.899185	1.04374	-0.8615	0.388963	0.510714
ILL.BSU-misc-RNA-38-extra.1~102	8.42077	-0.0429306	0.959975	-0.0447205	0.96433	0.981415
ILL.BSU-misc-RNA-39-extra.1~175	3098.28	0.346247	0.294106	1.17729	0.23908	0.345143
ILL.BSU-misc-RNA-4-extra.1~57	0.487007	-0.345718	4.23455	-0.0816421	0.934931	NA
ILL.BSU-misc-RNA-40-extra.1~208	1188.96	-0.576056	0.399302	-1.44266	0.149117	0.23344
ILL.BSU-misc-RNA-41-extra.1~193	14218.6	1.02427	1.14215	0.896792	0.36983	0.491206
ILL.BSU-misc-RNA-42-extra.1~233	4481.36	0.185022	0.22414	0.825476	0.409101	0.53107
ILL.BSU-misc-RNA-43-extra.1~76	16.0518	-1.84703	0.754382	-2.4484	0.0143494	0.0307668
ILL.BSU-misc-RNA-44-extra.1~223	3166.6	-0.118907	0.400467	-0.296921	0.766527	0.839256
ILL.BSU-misc-RNA-45-extra.1~247	1844.09	4.72677	0.373356	12.6602	9.82169e-37	3.72684e-35
ILL.BSU-misc-RNA-46-extra.1~180	1749.76	0.111285	0.358025	0.31083	0.75593	0.832187
ILL.BSU-misc-RNA-47-extra.1~131	329.823	-1.06028	0.336024	-3.15536	0.00160298	0.00426087
ILL.BSU-misc-RNA-48-extra.1~248	1350.55	-0.857581	0.272014	-3.15271	0.00161763	0.00429704
ILL.BSU-misc-RNA-49-extra.1~215	3406.81	-0.409253	0.405127	-1.01018	0.312407	0.427005
ILL.BSU-misc-RNA-5-extra.1~171	720.334	-0.433401	0.267927	-1.61761	0.105747	0.175234
ILL.BSU-misc-RNA-50-extra.1~139	1461.5	-1.93008	0.2592	-7.44629	9.60004e-14	8.74576e-13
ILL.BSU-misc-RNA-51-extra.1~102	2.95738	0.561629	1.8971	0.296047	0.767195	0.839256
ILL.BSU-misc-RNA-52-extra.1~149	264.621	-2.09036	0.344065	-6.07547	1.23624e-09	7.95192e-09
ILL.BSU-misc-RNA-53-extra.1~107	11.3238	-1.44824	0.914879	-1.58298	0.113425	0.185646
ILL.BSU-misc-RNA-54-extra.1~180	551.093	-0.239051	0.342327	-0.69831	0.484983	0.603094
ILL.BSU-misc-RNA-56-extra.1~236	814.741	1.34035	0.254028	5.27639	1.31756e-07	6.62141e-07
ILL.BSU-misc-RNA-57-extra.1~222	48.7884	-3.29298	2.39072	-1.3774	0.168389	0.257946
ILL.BSU-misc-RNA-58-extra.1~222	283.044	-2.1302	0.262909	-8.10243	5.38721e-16	5.6696e-15
ILL.BSU-misc-RNA-59-extra.1~207	75.4327	0.0786079	0.371169	0.211785	0.832275	0.886896
ILL.BSU-misc-RNA-6-extra.1~248	631.704	-0.383519	0.221374	-1.73245	0.083194	0.143073
ILL.BSU-misc-RNA-60-extra.1~103	223.547	0.502452	1.26043	0.398636	0.690162	0.779707
ILL.BSU-misc-RNA-61-extra.1~107	6.48037	3.38245	1.48667	2.27519	0.0228946	0.0466693
ILL.BSU-misc-RNA-62-extra.1~107	3.4513	2.2824	1.84197	1.23911	0.215306	0.317471
ILL.BSU-misc-RNA-63-extra.1~103	4.95566	-4.45013	1.87335	-2.37549	0.0175254	0.0368319
ILL.BSU-misc-RNA-7-extra.1~144	1378.16	-1.90904	0.390012	-4.89482	9.83944e-07	4.41867e-06
ILL.BSU-misc-RNA-8-extra.1~101	52.4062	-2.92576	0.56732	-5.15715	2.50731e-07	1.22003e-06
ILL.BSU-misc-RNA-9-extra.1~103	8.29676	-1.11726	0.978435	-1.14188	0.253504	0.362255
ILL.buk-BSU24070.4~1095	1416.28	-0.925529	0.203203	-4.55469	5.24623e-06	2.12106e-05
ILL.cah-BSU03180.1~957	709.095	0.0676097	0.248714	0.271838	0.785747	0.853016
ILL.carA-BSU11230.1~1062	8.72443	0.277636	0.938231	0.295914	0.767296	0.839256
ILL.carB-BSU11240.1~3093	62.1649	0.170148	0.39873	0.426726	0.669579	0.763342
ILL.carB-BSU15520.1~3216	7303.21	-1.3614	0.21971	-6.19636	5.77835e-10	3.87975e-09
ILL.catD-BSU08230.21~425	157.908	-0.569442	0.281873	-2.0202	0.0433622	0.0820055
ILL.catE-BSU08240.1~858	435.084	-0.421393	0.244898	-1.72069	0.0853075	0.1461
ILL.cbiO-BSU01450.128~973	4558.95	1.41631	0.268744	5.27012	1.36334e-07	6.83488e-07
ILL.cbiO-BSU01460.15~845	4117.74	1.46873	0.288047	5.09893	3.4158e-07	1.63138e-06
ILL.cca-BSU22450.5~1198	1916.46	-0.444418	0.242932	-1.82939	0.0673411	0.119333
ILL.cccA-BSU25190.32~394	287.944	0.61446	0.23892	2.57182	0.0101165	0.0225199
ILL.cccB-BSU35270.8~346	1752.4	-0.443582	0.184613	-2.40277	0.0162715	0.0345272
ILL.ccdA-BSU17930.86~793	609.073	1.71894	0.261769	6.56663	5.14655e-11	3.83534e-10
ILL.ccpA-BSU29740.151~1155	7272.68	-0.568127	0.201408	-2.82078	0.00479065	0.0113744
ILL.ccpB-BSU40870.44~979	133.192	0.760547	0.311979	2.43781	0.0147765	0.0316169
ILL.ccpC-BSU14140.25~906	2153.57	-0.223751	0.221031	-1.01231	0.311392	0.42618
ILL.ccpN-BSU25250.133~771	2285.05	-0.0133176	0.184145	-0.0723213	0.942346	0.967198
ILL.cdd-BSU25300.1~411	2599.48	1.09708	0.201154	5.45391	4.92736e-08	2.60874e-07
ILL.cdoA-BSU31140.338~823	16.7323	-1.13516	0.751414	-1.5107	0.130866	0.209628
ILL.cdsA-BSU16540.1~810	4393.78	1.06176	0.178926	5.93412	2.95434e-09	1.8049e-08
ILL.cgeA-BSU19780.15~416	2.57602	1.051	1.70903	0.614967	0.538577	0.650334
ILL.cgeB-BSU19790.7~960	33.266	1.14663	0.569528	2.0133	0.044083	0.0831785
ILL.cgeC-BSU19770.1~306	1.38163	1.90141	2.61616	0.726794	0.467352	NA
ILL.cgeD-BSU19760.1~1281	646.715	3.65668	0.316313	11.5603	6.54634e-31	1.78129e-29
ILL.cgeE-BSU19750.4~783	741.251	3.23231	0.286922	11.2655	1.94283e-29	4.89972e-28
ILL.cggR-BSU33950.100~1122	8193.95	-1.30651	0.265324	-4.92422	8.4697e-07	3.83688e-06
ILL.cheA-BSU16430.1~2019	13928.9	2.1912	0.179598	12.2006	3.0848e-34	1.0126e-32
ILL.cheB-BSU16420.2~1075	6488.59	2.05488	0.191816	10.7128	8.86863e-27	1.96153e-25
ILL.cheC-BSU16450.10~639	4407.69	2.29019	0.183564	12.4762	1.00682e-35	3.62104e-34
ILL.cheD-BSU16460.1~501	3688.5	2.2829	0.184862	12.3492	4.91877e-35	1.73881e-33
ILL.cheR-BSU22720.25~795	1663.64	2.31602	0.191099	12.1195	8.32638e-34	2.66184e-32
ILL.cheV-BSU14010.162~1073	6017.45	2.16129	0.247011	8.74977	2.13793e-18	2.67953e-17
ILL.cheW-BSU16440.22~492	4178.96	2.31023	0.190707	12.114	8.89953e-34	2.80981e-32
ILL.cheY-BSU16330.26~388	3337.12	1.5539	0.195732	7.9389	2.03985e-15	2.07804e-14
ILL.cimH-BSU38770.19~1371	397.396	3.2632	0.311233	10.4847	1.01527e-25	2.03843e-24
ILL.cinA-BSU16930.1~1251	9062.84	1.30438	0.177867	7.33346	2.24287e-13	1.99067e-12
ILL.citA-BSU09440.12~1112	471.292	-0.242481	0.224351	-1.08081	0.279781	0.393597
ILL.citB-BSU18000.43~2772	49975.8	2.14275	0.244451	8.7656	1.85792e-18	2.34279e-17
ILL.citH-BSU39060.1~1281	35.0626	-0.527974	0.498994	-1.05808	0.29002	0.404151
ILL.citM-BSU07610.40~1341	210.27	-0.183495	0.286902	-0.639575	0.522449	0.636771
ILL.citR-BSU09430.36~911	295.347	-0.188528	0.293271	-0.642846	0.520324	0.635013
ILL.citS-BSU07580.4~1632	814.049	1.88568	0.208682	9.03612	1.62339e-19	2.23811e-18
ILL.citT-BSU07590.1~681	309.546	1.59881	0.242576	6.59099	4.36903e-11	3.26769e-10
ILL.citZ-BSU29140.186~1304	15724	0.63599	0.18322	3.47118	0.000518168	0.00151032
ILL.clpC-BSU00860.1~2433	7416.33	-0.211297	0.198359	-1.06523	0.286772	0.400842
ILL.clpE-BSU13700.33~2132	1357.2	1.30029	0.216366	6.00968	1.85895e-09	1.16318e-08
ILL.clpP-BSU34540.42~635	8581.78	-0.740793	0.181275	-4.08657	4.378e-05	0.000153193
ILL.clpQ-BSU16150.1~546	3775.12	0.232648	0.188787	1.23233	0.217825	0.320323
ILL.clpX-BSU28220.1~1263	24528.8	-0.058667	0.208612	-0.281225	0.778538	0.847823
ILL.clsA-BSU36590.243~1691	1936.18	-0.239381	0.202104	-1.18444	0.236237	0.342114
ILL.clsB-BSU37190.1~1197	11.467	-0.0458331	0.866032	-0.0529231	0.957793	0.977166
ILL.cmk-BSU22890.1~675	4333.43	-0.557607	0.186176	-2.99506	0.00274394	0.00689066
ILL.coaA-BSU23760.1~960	968.637	0.240614	0.200572	1.19964	0.230279	0.335009
ILL.coaBC-BSU15700.78~1298	3486.47	2.22166	0.1809	12.2811	1.14407e-34	3.91062e-33
ILL.coaD-BSU15020.5~490	1719.89	-0.0304613	0.186609	-0.163236	0.870333	0.913861
ILL.coaE-BSU29060.16~609	1065.56	-0.0261573	0.193898	-0.134902	0.892689	0.93025
ILL.coaX-BSU00700.195~971	2578.2	-0.489318	0.213726	-2.28946	0.0220525	0.0451307
ILL.codY-BSU16170.1~780	7282.75	0.261406	0.185098	1.41226	0.157873	0.245475
ILL.coiA-BSU11530.57~1178	28.0118	-0.100269	0.554165	-0.180938	0.856416	0.903339
ILL.comA-BSU31680.3~647	1848.26	-0.373111	0.222141	-1.67961	0.0930326	0.157311
ILL.comC-BSU28070.21~767	20.1845	-0.343541	0.661449	-0.519376	0.603498	0.709211
ILL.comEA-BSU25590.1~618	10.2217	1.36293	1.04998	1.29805	0.194271	0.290703
ILL.comEB-BSU25580.10~579	473.857	-0.148487	0.224155	-0.662429	0.507696	0.622375
ILL.comEC-BSU25570.4~2334	245.218	0.788896	0.258734	3.04907	0.00229554	0.00590813
ILL.comER-BSU25600.84~905	11.9832	-0.0634909	0.834471	-0.0760853	0.939351	0.965496
ILL.comFA-BSU35470.7~1398	192.326	1.04333	0.291793	3.57557	0.000349469	0.00105044
ILL.comFB-BSU35460.60~356	136.746	0.422598	0.334086	1.26494	0.205893	0.306102
ILL.comFC-BSU35450.1~690	445.728	0.420422	0.223189	1.88371	0.0596045	0.107888
ILL.comGA-BSU24730.2~1072	14.6454	0.297158	0.750046	0.396187	0.691967	0.78052
ILL.comGB-BSU24720.1~972	7.87068	-0.180843	0.998775	-0.181065	0.856316	0.903339
ILL.comGC-BSU24710.1~297	3.58854	-0.788845	1.51991	-0.519008	0.603755	0.709211
ILL.comGD-BSU24700.1~432	4.17802	1.42422	1.39204	1.02312	0.306252	0.420677
ILL.comGE-BSU24690.1~348	3.6772	-0.162337	1.42315	-0.114069	0.909183	0.940644
ILL.comGF-BSU24680.26~409	6.4142	0.0627093	1.09453	0.0572936	0.954311	0.975298
ILL.comGG-BSU24670.1~375	17.2346	-0.873058	0.727449	-1.20016	0.230076	0.334898
ILL.comK-BSU10420.20~598	363.902	0.67495	0.22606	2.98571	0.00282922	0.00707905
ILL.comN-BSU27660.1~297	1163.37	-0.461763	0.193159	-2.39058	0.0168217	0.0354873
ILL.comP-BSU31690.1~2310	5648.92	-0.363713	0.184259	-1.97392	0.0483904	0.0900327
ILL.comQ-BSU31710.106~1005	925.353	-0.464945	0.246961	-1.88266	0.0597459	0.108097
ILL.comS-BSU03500.1~141	0	NA	NA	NA	NA	NA
ILL.comX-BSU31700.1~168	195.388	-0.686293	0.321317	-2.13588	0.0326894	0.0637151
ILL.comZ-BSU11310.15~206	601.041	-0.89216	0.218604	-4.08118	4.48082e-05	0.000156658
ILL.copA-BSU33500.84~2492	1539.93	-0.142004	0.212491	-0.668283	0.503953	0.619973
ILL.copB-BSU33490.70~2169	1542.52	0.174114	0.215565	0.807708	0.419259	0.540878
ILL.copZ-BSU33510.13~222	162.579	-0.59821	0.278701	-2.14642	0.0318393	0.062293
ILL.cotA-BSU06300.152~1693	45.7554	1.71505	0.493582	3.4747	0.000511431	0.00149279
ILL.cotB-BSU36050.1~1143	39.6662	-2.1188	0.550999	-3.84538	0.000120365	0.000388321
ILL.cotC-BSU17700.175~375	152.851	1.96753	0.371219	5.30018	1.15687e-07	5.84226e-07
ILL.cotD-BSU22200.11~238	1820.16	-0.702507	0.198036	-3.54738	0.000389088	0.00115941
ILL.cotE-BSU17030.26~571	40.983	0.109849	0.490598	0.223909	0.822828	0.880571
ILL.cotF-BSU40530.26~508	8.38543	-0.814021	0.962972	-0.845322	0.397931	0.520836
ILL.cotG-BSU36070.141~728	0	NA	NA	NA	NA	NA
ILL.cotH-BSU36060.1~1089	13.3033	-0.634255	0.79153	-0.801302	0.422957	0.544973
ILL.cotI-BSU30920.1~1074	5.50274	-1.69762	1.29778	-1.30809	0.190841	0.286193
ILL.cotJA-BSU06890.1~249	1.2753	-0.931975	2.55353	-0.364975	0.71513	NA
ILL.cotJB-BSU06900.1~264	1.48491	-0.365471	2.14564	-0.170332	0.864749	NA
ILL.cotJC-BSU06910.1~570	6.38339	-1.41139	1.17553	-1.20064	0.229892	0.334898
ILL.cotM-BSU17970.42~434	7.95614	-0.193247	0.99991	-0.193265	0.846752	0.897301
ILL.cotO-BSU11730.18~701	86.4229	0.0203297	0.539589	0.0376764	0.969946	0.983838
ILL.cotP-BSU05550.1~432	1.35083	-2.38601	2.58951	-0.921413	0.356835	NA
ILL.cotR-BSU34530.305~1267	39.2161	-1.37915	0.483527	-2.85227	0.00434082	0.0103838
ILL.cotS-BSU30900.1~1056	26.1818	-0.0115553	0.584263	-0.0197776	0.984221	0.990688
ILL.cotSA-BSU30910.1~1134	19.7653	-0.219687	0.656627	-0.334568	0.737951	0.818494
ILL.cotT-BSU12090.28~351	1.50728	-1.29242	2.79678	-0.46211	0.644003	0.742776
ILL.cotU-BSU17670.192~452	14.4737	-1.44342	0.973747	-1.48234	0.13825	0.218989
ILL.cotV-BSU11780.1~387	2.84265	0.646758	1.62654	0.397629	0.690904	0.779907
ILL.cotW-BSU11770.1~318	3.92063	0.338337	1.40038	0.241604	0.809087	0.868965
ILL.cotX-BSU11760.99~617	7.44221	-0.194473	1.04268	-0.186512	0.852043	0.900989
ILL.cotY-BSU11750.1~489	1.70445	0.890729	2.72006	0.327466	0.743315	0.822459
ILL.cotZ-BSU11740.1~447	2.80716	1.22934	1.73292	0.709402	0.478075	0.596836
ILL.coxA-BSU27830.148~744	41.66	1.55888	0.514352	3.03077	0.00243934	0.00622016
ILL.crcBA-BSU09600.1~357	358.429	0.206003	0.22541	0.913905	0.360767	0.481772
ILL.crh-BSU34740.24~281	2702.19	1.66829	0.326448	5.11042	3.21445e-07	1.54055e-06
ILL.csaA-BSU19040.1~333	180.748	1.19947	0.328131	3.65546	0.000256719	0.000794159
ILL.csbA-BSU35180.68~298	309.177	-0.687058	0.259633	-2.64626	0.00813864	0.0185055
ILL.csbB-BSU08600.1~990	1442.62	-0.669172	0.19676	-3.40095	0.000671525	0.00191811
ILL.csbC-BSU39810.18~1403	50.7393	0.921483	0.50455	1.82635	0.0677982	0.12004
ILL.csbD-BSU36670.14~202	4.18341	1.4263	1.38723	1.02817	0.303872	0.418452
ILL.csbX-BSU27760.6~1313	568.263	-0.157057	0.231222	-0.67925	0.496979	0.613959
ILL.csfB-BSU00240.130~324	249.389	-0.31702	0.414486	-0.76485	0.444361	0.564458
ILL.csgA-BSU02070.112~360	7.15629	2.47081	1.31034	1.88562	0.0593457	0.107561
ILL.cshA-BSU04580.1~1536	23422.6	-0.243273	0.207306	-1.1735	0.240596	0.34689
ILL.cshB-BSU25140.29~1345	4767.87	-0.392687	0.229969	-1.70756	0.0877174	0.149485
ILL.csn-BSU26890.12~845	254.411	-0.151126	0.248787	-0.60745	0.543552	0.654288
ILL.csoR-BSU33520.10~315	246.986	-0.347281	0.258615	-1.34285	0.17932	0.271191
ILL.cspB-BSU09100.69~272	56049.1	-1.2837	0.221243	-5.80221	6.54469e-09	3.86697e-08
ILL.cspC-BSU05120.89~289	10617.1	-1.05731	0.256911	-4.11549	3.86357e-05	0.000136696
ILL.cspD-BSU21930.26~226	28452	0.677802	0.197547	3.43109	0.000601166	0.00173754
ILL.cspR-BSU08930.1~483	2543.56	-0.367112	0.181025	-2.02797	0.0425635	0.0807535
ILL.csrA-BSU35370.1~225	1153.37	3.24984	0.212617	15.2849	9.63489e-53	9.48808e-51
ILL.cssR-BSU33010.11~688	324.236	0.17835	0.279614	0.637843	0.523576	0.637665
ILL.cssS-BSU33020.1~1356	845.347	0.0220829	0.225797	0.0977996	0.922091	0.951777
ILL.cstA-BSU28710.9~1805	1598.97	-0.745926	0.247657	-3.01193	0.00259594	0.00655883
ILL.ctaA-BSU14870.355~1275	1437.5	-0.935274	0.305514	-3.06132	0.00220367	0.00570005
ILL.ctaB-BSU14880.1~918	6382.13	0.138403	0.26322	0.525806	0.599023	0.704653
ILL.ctaC-BSU14890.224~1294	1159.46	2.46032	0.212704	11.5668	6.06802e-31	1.66208e-29
ILL.ctaD-BSU14900.33~1901	2180.7	2.49451	0.20895	11.9383	7.47e-33	2.27176e-31
ILL.ctaE-BSU14910.1~624	758.907	2.422	0.215613	11.2331	2.80432e-29	6.98714e-28
ILL.ctaF-BSU14920.1~333	313.782	2.22562	0.307696	7.23319	4.71766e-13	4.09921e-12
ILL.ctaG-BSU14930.1~894	810.04	2.97722	0.255513	11.652	2.24253e-31	6.3528e-30
ILL.ctaO-BSU12080.118~1107	69.322	-0.0761966	0.427974	-0.17804	0.858691	0.904322
ILL.ctc-BSU00520.18~632	7700.75	-1.23027	0.174636	-7.04477	1.85774e-12	1.55539e-11
ILL.ctpA-BSU19590.12~1412	5107.53	-0.0036551	0.219646	-0.0166408	0.986723	0.992
ILL.ctpB-BSU35240.140~1582	103.074	0.821472	0.37299	2.2024	0.0276373	0.0551946
ILL.ctrA-BSU09460.120~1517	758.243	6.03128	0.378223	15.9463	3.02127e-57	4.30895e-55
ILL.ctsR-BSU00830.134~598	673.03	-0.449902	0.231789	-1.941	0.0522581	0.0961475
ILL.cueR-BSU09560.8~439	2586.57	1.18342	0.190679	6.20637	5.42224e-10	3.6525e-09
ILL.cwlA-BSU25900.1~819	15.0323	-0.292989	0.732749	-0.39985	0.689267	0.779229
ILL.cwlC-BSU17410.1~768	111.098	-0.146568	0.327291	-0.447823	0.654281	0.751071
ILL.cwlD-BSU01530.60~773	74.2172	1.15324	0.410279	2.81088	0.00494067	0.0116713
ILL.cwlH-BSU25710.45~797	5.4942	0.536974	1.18518	0.453075	0.650495	0.747554
ILL.cwlJ-BSU02600.314~742	60.5451	0.234251	0.42033	0.557303	0.57732	0.685951
ILL.cwlK-BSU02810.60~563	93.2742	-0.592166	0.337417	-1.755	0.0792601	0.136991
ILL.cwlO-BSU34800.178~1599	36941	-0.129678	0.188939	-0.686347	0.492494	0.610232
ILL.cwlS-BSU19410.274~1518	1543.72	1.71363	0.20089	8.53018	1.46125e-17	1.72186e-16
ILL.cycB-BSU34160.25~1290	377.237	-0.209563	0.310576	-0.674754	0.499832	0.61637
ILL.cydA-BSU38760.182~1588	21.7187	-0.402953	0.618226	-0.651789	0.514537	0.629437
ILL.cydB-BSU38750.1~1017	30.9385	-0.00641302	0.525378	-0.0122065	0.990261	0.994348
ILL.cydC-BSU38740.1~1704	72.7148	0.366927	0.370935	0.989197	0.322567	0.438861
ILL.cydD-BSU38730.1~1728	101.418	-0.179263	0.389951	-0.459706	0.645727	0.74435
ILL.cyeA-BSU18770.1~879	85.2575	0.537767	0.346568	1.55169	0.120736	0.195522
ILL.cyeB-BSU34000.18~935	189.745	-0.0909797	0.285557	-0.318604	0.750027	0.828034
ILL.cymR-BSU27520.71~487	1147.13	-0.639165	0.245797	-2.60038	0.00931199	0.0209204
ILL.cypA-BSU26740.1~1233	336.696	2.69526	0.318382	8.46548	2.55103e-17	2.95548e-16
ILL.cypB-BSU27160.16~3180	997.307	-0.449401	0.231383	-1.94224	0.0521077	0.0959562
ILL.cypC-BSU02100.90~1343	36.6437	0.0668637	0.491932	0.13592	0.891884	0.929645
ILL.cypX-BSU35060.1~1218	338.26	-0.170081	0.257409	-0.660742	0.508778	0.623497
ILL.cysC-BSU15600.1~594	2145.48	3.34177	0.288596	11.5794	5.24097e-31	1.44511e-29
ILL.cysE-BSU00930.125~778	1043.66	0.208712	0.23922	0.87247	0.382952	0.504584
ILL.cysH-BSU15570.162~863	3974.96	2.97902	0.20095	14.8247	1.01419e-49	8.38942e-48
ILL.cysJ-BSU33440.32~1849	2442.05	2.07291	0.187921	11.0307	2.717e-28	6.38494e-27
ILL.cysK-BSU00730.1~927	8807.09	0.266068	0.241619	1.10119	0.270815	0.382806
ILL.cysL-BSU37650.6~905	619.285	-0.111085	0.242612	-0.45787	0.647046	0.744832
ILL.cysP-BSU15580.5~1069	3272.03	3.19881	0.217386	14.7149	5.17238e-49	4.11403e-47
ILL.cysS-BSU00940.1~1401	2633.57	0.364282	0.191709	1.90018	0.0574095	0.104648
ILL.czcD-BSU26650.15~950	107.39	0.934519	0.327905	2.84997	0.00437232	0.0104531
ILL.czrA-BSU19120.12~335	326.353	0.524048	0.236604	2.21487	0.0267688	0.0536673
ILL.dacA-BSU00100.61~1392	11026.5	-1.00119	0.186899	-5.35689	8.4668e-08	4.36098e-07
ILL.dacB-BSU23190.123~1271	116.489	-0.069089	0.390223	-0.17705	0.859469	0.90447
ILL.dacC-BSU18350.33~1508	227.279	1.04968	0.329176	3.18881	0.0014286	0.00382688
ILL.dacF-BSU23480.1~1170	9.35548	1.90308	0.99517	1.91232	0.0558354	0.102093
ILL.dapA-BSU16770.1~873	13075.9	0.82378	0.174515	4.72041	2.35374e-06	1.00362e-05
ILL.dapB-BSU22490.12~815	1219.7	-0.556696	0.215017	-2.58909	0.00962313	0.021491
ILL.dapF-BSU32170.20~874	3980.19	0.839806	0.212372	3.95442	7.67209e-05	0.000258416
ILL.dapG-BSU16760.92~1306	12454.4	0.969668	0.173707	5.58219	2.37505e-08	1.32032e-07
ILL.dapH-BSU14180.21~731	8422.5	-0.315014	0.203933	-1.5447	0.12242	0.197939
ILL.dapL-BSU14190.70~1194	5186.73	2.04007	0.192559	10.5945	3.15923e-26	6.66662e-25
ILL.dat-BSU09670.1~849	2231.75	1.86755	0.194004	9.62637	6.18769e-22	9.65746e-21
ILL.dck-BSU00140.1~654	1198.39	-1.37542	0.195162	-7.04757	1.82071e-12	1.53058e-11
ILL.dctB-BSU04440.1~1053	417.316	-0.360999	0.224591	-1.60736	0.107976	0.178065
ILL.dctP-BSU04470.1~1266	7546.03	-0.488022	0.308087	-1.58404	0.113185	0.185472
ILL.dctR-BSU04460.1~681	279.78	-0.399539	0.242765	-1.64579	0.0998076	0.167195
ILL.dctS-BSU04450.70~1677	573.184	-0.159275	0.207399	-0.767963	0.442509	0.563491
ILL.ddl-BSU04560.175~1239	6209.74	-1.16542	0.200102	-5.82413	5.74101e-09	3.41652e-08
ILL.deaD-BSU39110.1~1440	3963.66	-0.550611	0.209909	-2.62309	0.00871352	0.0196827
ILL.def-BSU14560.7~561	1725.67	-0.358482	0.212028	-1.69073	0.0908891	0.154064
ILL.def-BSU15720.27~509	1331.59	1.59974	0.193484	8.26807	1.3615e-16	1.50566e-15
ILL.degA-BSU10840.18~1031	669.629	-0.00645536	0.207496	-0.0311108	0.975181	0.986165
ILL.degQ-BSU31720.193~333	125.829	1.77542	0.32831	5.40776	6.38176e-08	3.32849e-07
ILL.degR-BSU21940.37~219	735.939	1.29417	0.295474	4.37999	1.18686e-05	4.57487e-05
ILL.degS-BSU35500.1~1158	2280.41	-0.631565	0.181718	-3.47553	0.000509847	0.00148921
ILL.degU-BSU35490.2~691	2431.23	-0.594224	0.185921	-3.19611	0.00139295	0.00374106
ILL.deoC-BSU39420.1~672	2608.47	-0.772027	0.208528	-3.70228	0.000213672	0.000665975
ILL.deoD-BSU19630.1~702	2945.33	-1.09887	0.21907	-5.01606	5.2742e-07	2.45654e-06
ILL.deoR-BSU39430.35~976	1267.27	-0.057381	0.188381	-0.304601	0.76067	0.835404
ILL.des-BSU19180.162~1220	824.955	0.0344734	0.389391	0.0885318	0.929454	0.957227
ILL.desK-BSU19190.5~1117	271.006	0.799732	0.310356	2.57682	0.0099713	0.0222205
ILL.desR-BSU19200.1~600	270.123	0.851588	0.251726	3.383	0.000716985	0.00204092
ILL.dfrA-BSU21810.1~507	1962.89	1.23837	0.185478	6.67663	2.44506e-11	1.87621e-10
ILL.dgcK-BSU09120.1~1080	1717.57	-1.72663	0.202211	-8.53875	1.35685e-17	1.6034e-16
ILL.dgcP-BSU29650.71~1810	1982.14	-0.698085	0.191076	-3.65343	0.000258756	0.000799263
ILL.dgcW-BSU13420.334~2583	2947.83	1.95791	0.206358	9.48793	2.35666e-21	3.59673e-20
ILL.dgk-BSU00150.1~624	1082.18	-1.45311	0.193302	-7.51732	5.59108e-14	5.19656e-13
ILL.dgkA-BSU25310.1~372	1227.6	1.30311	0.2099	6.20826	5.35728e-10	3.61463e-09
ILL.dgrA-BSU22910.1~654	779.266	0.291871	0.231017	1.26342	0.20644	0.306693
ILL.dhaS-BSU19310.106~1593	3831.58	0.431498	0.179899	2.39856	0.0164596	0.0348166
ILL.dhbA-BSU32000.122~907	757.906	-1.9096	0.416613	-4.58362	4.56996e-06	1.877e-05
ILL.dhbB-BSU31970.1~939	713.089	-1.59158	0.40641	-3.91618	8.99638e-05	0.000299108
ILL.dhbC-BSU31990.26~1222	1057.46	-1.673	0.43079	-3.88356	0.000102937	0.000339017
ILL.dhbE-BSU31980.1~1620	1132.56	-1.75953	0.441436	-3.98592	6.72199e-05	0.000228824
ILL.dhbF-BSU31960.1~7137	4178.14	-0.900785	0.418007	-2.15495	0.0311658	0.061207
ILL.dinB-BSU05630.14~532	328.144	-1.91206	0.282261	-6.77407	1.25207e-11	9.80792e-11
ILL.dinF-BSU21710.72~1409	3135.87	3.26454	0.211524	15.4334	9.75245e-54	1.06148e-51
ILL.dinG-BSU22400.1~2796	11191.7	0.683023	0.174882	3.90562	9.39829e-05	0.000311
ILL.divIB-BSU15240.88~879	2218.4	1.27826	0.212976	6.00191	1.95012e-09	1.21654e-08
ILL.divIC-BSU00620.18~395	2680.81	0.210329	0.209533	1.0038	0.315475	0.430182
ILL.divIVA-BSU15420.1~495	6085.8	0.575001	0.193638	2.96946	0.00298324	0.00741952
ILL.dltA-BSU38500.1~1512	19567.8	-0.659224	0.212089	-3.10823	0.00188209	0.00495501
ILL.dltB-BSU38510.1~1188	14761.7	-0.438248	0.271716	-1.61289	0.106768	0.176567
ILL.dltC-BSU38520.17~253	2128.9	-0.738934	0.263764	-2.8015	0.00508661	0.0119603
ILL.dltD-BSU38530.1~1179	16817.2	-0.477158	0.222221	-2.14722	0.031776	0.0621985
ILL.dltE-BSU38540.1~759	11683.2	-0.635588	0.224891	-2.82621	0.00471025	0.0112157
ILL.dnaA-BSU00010.281~1621	12444.7	-0.531941	0.190564	-2.7914	0.00524811	0.0122842
ILL.dnaB-BSU28990.115~1533	4429.73	2.09984	0.192256	10.9221	9.03517e-28	2.05327e-26
ILL.dnaC-BSU40440.25~1389	3120.35	-1.43671	0.183773	-7.81785	5.37321e-15	5.34221e-14
ILL.dnaD-BSU22350.77~775	7249.21	2.26057	0.178126	12.6908	6.64821e-37	2.59406e-35
ILL.dnaE-BSU29230.1~3348	4955.26	-0.390939	0.177329	-2.2046	0.0274821	0.0549112
ILL.dnaG-BSU25210.1~1812	13079.3	-0.416662	0.179571	-2.32032	0.0203235	0.041987
ILL.dnaI-BSU28980.1~936	3447.99	2.09109	0.193344	10.8154	2.91078e-27	6.57868e-26
ILL.dnaJ-BSU25460.200~1327	5237.56	-0.755514	0.235476	-3.20845	0.00133451	0.00360284
ILL.dnaK-BSU25470.24~1859	19507.6	-0.864801	0.175336	-4.93225	8.12858e-07	3.69043e-06
ILL.dnaN-BSU00020.179~1315	9826.36	0.120058	0.1891	0.634893	0.525498	0.638878
ILL.dnaX-BSU00190.36~1727	6524.55	0.121238	0.208758	0.580758	0.561403	0.672448
ILL.dppA-BSU12920.12~836	388.758	3.17568	0.349906	9.0758	1.12848e-19	1.56625e-18
ILL.dppB-BSU12930.1~927	109.964	2.97631	0.382647	7.77822	7.35509e-15	7.20869e-14
ILL.dppC-BSU12940.1~963	53.36	2.64126	0.486323	5.43109	5.60115e-08	2.94363e-07
ILL.dppD-BSU12950.1~1008	60.0336	2.64452	0.502455	5.26319	1.41576e-07	7.07198e-07
ILL.dppE-BSU12960.3~1652	172.97	2.30061	0.341175	6.74318	1.54954e-11	1.20695e-10
ILL.dprA-BSU16110.61~954	1772.49	1.63952	0.194733	8.41932	3.78662e-17	4.33835e-16
ILL.dps-BSU30650.1~438	2874.25	0.76237	0.260397	2.92773	0.0034145	0.0083912
ILL.drm-BSU23500.1~1185	10591.4	-0.79591	0.19139	-4.15858	3.20238e-05	0.000115074
ILL.dsdA-BSU23770.76~1422	925.418	0.222362	0.217857	1.02068	0.307408	0.421565
ILL.dtpT-BSU03670.1~1479	1625.37	-2.84701	0.265406	-10.727	7.6035e-27	1.69076e-25
ILL.dusB-BSU00810.24~1025	7324.14	0.246918	0.177687	1.38962	0.164644	0.253613
ILL.dusC-BSU08030.41~1018	1641.43	-0.624279	0.207931	-3.00233	0.00267918	0.00673622
ILL.dxr-BSU16550.1~1152	7673.38	0.674511	0.179114	3.76582	0.000166001	0.000524509
ILL.dxs-BSU24270.1~1902	7931.54	0.373226	0.195236	1.91167	0.0559185	0.1022
ILL.eag-BSU13650.81~512	282.14	1.73533	0.265599	6.53363	6.41927e-11	4.73264e-10
ILL.ebrA-BSU17300.7~324	102.277	-0.378137	0.356484	-1.06074	0.288808	0.403162
ILL.ebrB-BSU17290.5~358	124.232	-0.312087	0.344225	-0.906637	0.364599	0.485349
ILL.ecsA-BSU10040.378~1121	855.697	-0.666242	0.218025	-3.0558	0.00224459	0.00579154
ILL.ecsB-BSU10050.1~1227	1433.51	-0.522096	0.228703	-2.28286	0.0224388	0.0457852
ILL.ecsC-BSU10060.18~728	1151.16	-0.65523	0.209623	-3.12576	0.00177347	0.00468394
ILL.efeM-BSU38270.1~1158	4447.65	-0.682757	0.27224	-2.50792	0.0121444	0.0265481
ILL.efeN-BSU38260.19~1269	5915.34	-0.660651	0.258627	-2.55445	0.0106354	0.0235988
ILL.efeU-BSU38280.25~1470	2519.74	-0.546028	0.334356	-1.63308	0.102453	0.170934
ILL.efp-BSU24450.25~582	8755.01	-0.907798	0.174667	-5.19732	2.02184e-07	9.91973e-07
ILL.eglS-BSU18130.34~1533	333.966	1.21752	0.252404	4.82371	1.40915e-06	6.20026e-06
ILL.endB-BSU04650.18~299	6623.25	-0.767964	0.177159	-4.33488	1.45837e-05	5.57983e-05
ILL.engA-BSU22840.27~1337	8356.01	-0.171827	0.20438	-0.840726	0.400501	0.522877
ILL.engB-BSU28190.1~588	2694.98	0.0140471	0.205327	0.0684134	0.945457	0.969054
ILL.eno-BSU33900.30~1322	32362.6	-0.969345	0.213434	-4.54167	5.58109e-06	2.25424e-05
ILL.epr-BSU38400.9~1946	18334.8	3.08222	0.202496	15.2212	2.55916e-52	2.46156e-50
ILL.epsA-BSU34370.38~742	68.1239	-2.38991	0.475054	-5.03082	4.88391e-07	2.28764e-06
ILL.epsB-BSU34360.6~689	73.1978	-2.92619	0.447589	-6.53767	6.24845e-11	4.62319e-10
ILL.epsC-BSU34350.1~1797	337.251	0.0846489	0.248289	0.340929	0.733157	0.815145
ILL.epsD-BSU34340.1~1146	178.216	-0.422348	0.28321	-1.49129	0.135886	0.215997
ILL.epsE-BSU34330.1~837	100.987	-0.602412	0.338081	-1.78185	0.0747729	0.130325
ILL.epsF-BSU34320.1~1155	81.7825	-1.0714	0.362831	-2.95289	0.00314814	0.00778285
ILL.epsG-BSU34310.1~1104	47.7223	-1.30864	0.463654	-2.82244	0.00476592	0.0113287
ILL.epsH-BSU34300.25~1059	51.4785	-1.72027	0.565165	-3.04384	0.0023358	0.0059931
ILL.epsI-BSU34290.5~1081	64.7438	-1.2542	0.409041	-3.06619	0.00216804	0.0056149
ILL.epsJ-BSU34280.1~1035	80.1828	-1.25209	0.391382	-3.19916	0.00137829	0.00370651
ILL.epsK-BSU34265.1~1518	98.9697	-1.16911	0.331036	-3.53168	0.000412936	0.00122871
ILL.epsL-BSU34250.1~609	49.9591	-0.899256	0.490589	-1.83301	0.0668004	0.118527
ILL.epsM-BSU34240.1~651	47.0868	-1.4539	0.517691	-2.80843	0.00497836	0.0117459
ILL.epsN-BSU34230.5~1171	98.2935	-1.63816	0.438624	-3.73477	0.000187883	0.000589594
ILL.epsO-BSU34220.1~969	80.9889	-1.50458	0.387835	-3.87942	0.000104706	0.000343703
ILL.era-BSU25290.1~906	8808.88	1.10492	0.197234	5.60208	2.11793e-08	1.18745e-07
ILL.estA-BSU02700.18~656	483.889	-1.42595	0.219838	-6.48637	8.79262e-11	6.40251e-10
ILL.estB-BSU08350.6~638	710.913	-0.86616	0.219564	-3.94491	7.98297e-05	0.000268218
ILL.etfA-BSU28520.12~989	1176.96	-0.351778	0.204809	-1.71759	0.0858713	0.146762
ILL.etfB-BSU28530.15~788	938.307	-0.193015	0.202963	-0.950987	0.341611	0.460079
ILL.eutD-BSU37660.43~1014	17246.8	-1.93251	0.246072	-7.85344	4.04784e-15	4.04393e-14
ILL.exlX-BSU18630.1~699	342.099	-0.458748	0.254214	-1.80457	0.0711416	0.124679
ILL.exoA-BSU22010.13~903	1481.04	0.397426	0.215258	1.84628	0.0648514	0.115614
ILL.exoAA-BSU40880.9~767	858.924	0.959779	0.256198	3.74624	0.000179504	0.000565014
ILL.exuM-BSU12310.68~1447	11.4385	-0.49087	0.914422	-0.536809	0.591399	0.697271
ILL.exuR-BSU12370.25~1026	891.027	0.582514	0.195541	2.97899	0.00289204	0.00721441
ILL.exuT-BSU12360.1~1269	29.3542	0.403569	0.555691	0.726247	0.467688	0.586169
ILL.ezrA-BSU29610.1~1689	11284.3	0.00755992	0.186706	0.0404911	0.967702	0.982878
ILL.fabD-BSU15900.1~954	6177.64	-0.473554	0.243611	-1.94389	0.0519087	0.0956323
ILL.fabF-BSU11340.23~1264	8146.61	-1.27787	0.356031	-3.58922	0.000331668	0.00099984
ILL.fabG-BSU15910.1~741	6537.76	-0.388901	0.214949	-1.80927	0.0704085	0.123656
ILL.fabG-BSU16870.55~783	735.99	1.03658	0.211174	4.90865	9.17062e-07	4.13177e-06
ILL.fabG-BSU18500.21~737	3075.8	-2.23285	0.203695	-10.9617	5.83599e-28	1.34847e-26
ILL.fabG-BSU29420.41~808	1083.72	-1.26512	0.230655	-5.48491	4.13676e-08	2.22203e-07
ILL.fabHA-BSU11330.1~939	4914.59	-0.972128	0.369562	-2.63049	0.00852631	0.0193126
ILL.fabHB-BSU10170.2~979	739.017	-0.434972	0.948712	-0.458486	0.646603	0.744832
ILL.fabI-BSU11720.136~912	9556.6	-1.20047	0.330955	-3.62728	0.000286421	0.000877555
ILL.fabL-BSU08650.1~753	2679.6	-1.13333	0.190292	-5.95572	2.58937e-09	1.59132e-08
ILL.fabZ-BSU36370.51~476	2074.97	-0.836453	0.189779	-4.40751	1.04565e-05	4.05703e-05
ILL.fadE-BSU32820.15~1799	438.689	0.519514	0.264649	1.96303	0.0496426	0.0919901
ILL.fadF-BSU37180.37~2154	214.808	0.0751021	0.290306	0.258699	0.795867	0.859811
ILL.fadG-BSU14071.1~1731	733.271	-0.487634	0.245621	-1.98531	0.0471097	0.0880062
ILL.fadM-BSU32850.1~909	4.02391	-0.375533	1.39798	-0.268626	0.788217	0.854091
ILL.fadN-BSU32840.1~2448	484.951	0.604265	0.282058	2.14234	0.0321661	0.0628432
ILL.fadR-BSU28550.6~590	449.116	-0.302134	0.237398	-1.27269	0.203129	0.302645
ILL.fbaA-BSU37120.73~930	58942	-0.815797	0.174965	-4.66264	3.12185e-06	1.30688e-05
ILL.fbp-BSU40190.1~2016	2108.25	-0.675731	0.204489	-3.30448	0.000951529	0.00264353
ILL.fdhD-BSU36710.19~807	947.989	-0.00607383	0.201597	-0.0301285	0.975965	0.986218
ILL.fer-BSU23040.72~320	4620.43	-0.148126	0.231649	-0.639444	0.522534	0.636771
ILL.feuA-BSU01630.1~954	968.916	-2.1486	0.343773	-6.25005	4.10317e-10	2.80508e-09
ILL.feuB-BSU01620.1~1005	454.225	-1.66647	0.346606	-4.80795	1.52482e-06	6.68079e-06
ILL.feuC-BSU01610.1~1011	462.577	-1.58741	0.307545	-5.16156	2.44894e-07	1.19303e-06
ILL.ffh-BSU15980.14~1354	21723.9	-0.47329	0.240431	-1.9685	0.0490101	0.090981
ILL.fhuB-BSU33310.1~1155	1101.4	-1.73406	0.290229	-5.9748	2.30378e-09	1.42855e-08
ILL.fhuC-BSU33290.16~825	1928.12	-1.39238	0.26832	-5.18923	2.11161e-07	1.03234e-06
ILL.fhuD-BSU33320.37~984	4536.24	-1.52114	0.343868	-4.42361	9.70662e-06	3.78384e-05
ILL.fhuG-BSU33300.1~1011	1316.73	-1.14105	0.301273	-3.78743	0.000152214	0.000484275
ILL.flgB-BSU16180.49~438	2066.69	1.19964	0.21044	5.70063	1.19363e-08	6.86626e-08
ILL.flgC-BSU16190.1~453	2485.58	1.36542	0.183357	7.44677	9.56536e-14	8.73341e-13
ILL.flgD-BSU16280.1~423	2756.78	1.73057	0.212782	8.13307	4.1856e-16	4.45029e-15
ILL.flgG-BSU16290.22~816	6970.25	1.80474	0.197511	9.13743	6.39549e-20	8.96669e-19
ILL.flgK-BSU35410.13~1536	19944.8	2.38827	0.202798	11.7766	5.15477e-32	1.50142e-30
ILL.flgL-BSU35400.11~907	12979.7	2.35807	0.234964	10.0359	1.0601e-23	1.86363e-22
ILL.flgM-BSU35430.81~347	3387.61	2.18131	0.217946	10.0085	1.39894e-23	2.42093e-22
ILL.flhA-BSU16390.1~2034	16553.8	1.56481	0.175481	8.9173	4.77774e-19	6.2534e-18
ILL.flhB-BSU16380.1~1083	5959.23	1.84395	0.176709	10.4349	1.71704e-25	3.36573e-24
ILL.flhF-BSU16400.1~1101	5141.15	2.08519	0.180399	11.5588	6.66629e-31	1.80208e-29
ILL.flhO-BSU36400.66~878	6699.71	1.35377	0.21561	6.2788	3.41204e-10	2.35596e-09
ILL.flhP-BSU36390.34~843	6925.21	1.55235	0.239296	6.48714	8.7483e-11	6.38147e-10
ILL.fliD-BSU35340.18~1514	18750.7	1.73058	0.182528	9.48116	2.51467e-21	3.82378e-20
ILL.fliE-BSU16200.1~321	1940.74	1.2634	0.205531	6.147	7.896e-10	5.21691e-09
ILL.fliF-BSU16210.8~1618	10479.8	1.39922	0.184179	7.59709	3.02867e-14	2.86649e-13
ILL.fliG-BSU16220.13~1029	7477.9	1.59377	0.1956	8.14809	3.69709e-16	3.96042e-15
ILL.fliH-BSU16230.1~627	3501.04	1.60121	0.179406	8.92504	4.45542e-19	5.85003e-18
ILL.fliI-BSU16240.1~1317	9279.21	1.55245	0.180861	8.58366	9.18996e-18	1.09538e-16
ILL.fliJ-BSU16250.3~446	1822.74	1.17949	0.345868	3.41024	0.000649055	0.00186164
ILL.fliK-BSU16270.1~1464	10451.2	1.67023	0.184995	9.02847	1.74086e-19	2.39209e-18
ILL.fliL-BSU16300.1~423	1620.99	1.60724	0.214223	7.50264	6.25442e-14	5.78709e-13
ILL.fliM-BSU16310.34~1032	7304.82	1.62597	0.181671	8.95012	3.55081e-19	4.69206e-18
ILL.fliP-BSU16350.1~666	3686.48	1.83564	0.211802	8.66678	4.44519e-18	5.45558e-17
ILL.fliQ-BSU16360.1~270	1051.37	1.81713	0.201606	9.01326	2.00013e-19	2.73021e-18
ILL.fliR-BSU16370.1~780	3489.98	1.84774	0.195664	9.44345	3.60695e-21	5.4646e-20
ILL.fliS-BSU35330.1~402	3961.33	1.82006	0.222371	8.18481	2.72742e-16	2.93766e-15
ILL.fliT-BSU35320.1~342	4501.06	1.84803	0.225614	8.19111	2.58832e-16	2.80244e-15
ILL.fliY-BSU16320.1~1137	9457.4	1.67059	0.174591	9.56858	1.08387e-21	1.6665e-20
ILL.fliZ-BSU16340.13~672	4015.52	1.75905	0.191795	9.17154	4.66321e-20	6.60515e-19
ILL.fmnP-BSU23050.106~678	1278.05	0.819322	0.211365	3.87634	0.000106041	0.000346709
ILL.fmt-BSU15730.5~958	4194.43	1.80565	0.18008	10.027	1.16028e-23	2.02486e-22
ILL.fni-BSU22870.1~1050	8663.12	1.67192	0.214346	7.80011	6.18518e-15	6.0933e-14
ILL.fnr-BSU37310.5~721	201.325	-0.496647	0.287544	-1.7272	0.0841312	0.144504
ILL.folB-BSU00780.1~363	941.954	0.782875	0.22035	3.55288	0.000381045	0.00113791
ILL.folC-BSU28080.60~1352	1655.15	-1.37099	0.205892	-6.65879	2.76095e-11	2.103e-10
ILL.folD-BSU24310.12~863	8259.61	-0.100375	0.193934	-0.517574	0.604756	0.709657
ILL.folE-BSU22780.188~760	9536.64	1.36648	0.184837	7.39287	1.43689e-13	1.29195e-12
ILL.folK-BSU00790.1~504	1912.83	0.388706	0.2002	1.94158	0.0521874	0.0960601
ILL.frlB-BSU32610.3~989	9974.6	6.4768	0.362564	17.8639	2.25453e-71	6.66054e-69
ILL.frlD-BSU32570.1~855	620.948	3.89712	0.400745	9.72468	2.36642e-22	3.80838e-21
ILL.frlM-BSU32580.1~903	571.872	7.33825	1.15164	6.372	1.86582e-10	1.33052e-09
ILL.frlN-BSU32590.58~936	956.201	6.26281	0.397908	15.7393	8.12836e-56	1.01875e-53
ILL.frlO-BSU32600.72~1340	2764.91	6.51316	0.337639	19.2903	6.4796e-83	2.67996e-80
ILL.frlR-BSU32560.1~789	843.943	1.5965	0.227212	7.02649	2.11799e-12	1.76613e-11
ILL.frr-BSU16520.1~558	10933.4	-0.543474	0.172813	-3.14487	0.00166161	0.00441105
ILL.fruA-BSU14400.1~1908	2477.88	0.0413525	0.204511	0.202202	0.839759	0.891947
ILL.fruK-BSU14390.1~912	1026.48	-0.0765747	0.214178	-0.357528	0.720697	0.802971
ILL.fruR-BSU14380.8~763	730.837	-0.0167204	0.238806	-0.0700167	0.94418	0.968228
ILL.ftsA-BSU15280.2~1324	12472.3	0.354683	0.173531	2.04391	0.040962	0.0779126
ILL.ftsE-BSU35260.114~800	4420.65	-0.10478	0.237894	-0.440446	0.659614	0.756143
ILL.ftsH-BSU00690.1~1914	44802.9	-0.983343	0.180829	-5.43797	5.38915e-08	2.83943e-07
ILL.ftsL-BSU15150.1~354	1815.3	0.152869	0.188741	0.80994	0.417974	0.539726
ILL.ftsR-BSU18420.35~892	421.105	0.342188	0.224573	1.52373	0.127577	0.204916
ILL.ftsW-BSU14850.206~1417	6043.91	1.94677	0.200595	9.70498	2.87128e-22	4.53267e-21
ILL.ftsX-BSU35250.1~891	6353.17	0.0532578	0.239022	0.222816	0.823679	0.881204
ILL.ftsY-BSU15950.1~990	7498.03	1.04464	0.186356	5.60564	2.07492e-08	1.16699e-07
ILL.ftsZ-BSU15290.1~1149	18018.6	0.628576	0.191683	3.27926	0.00104081	0.00286413
ILL.fumC-BSU33040.1~1389	11118.3	-0.713607	0.240902	-2.96223	0.00305417	0.00758682
ILL.fur-BSU23520.10~459	2431.56	-0.830257	0.21205	-3.91539	9.02586e-05	0.000299847
ILL.fusA-BSU01120.54~2132	336932	-0.860133	0.237517	-3.62135	0.000293071	0.000895891
ILL.fxsA-BSU29170.87~470	3416.43	0.0503774	0.178107	0.282849	0.777292	0.846913
ILL.gabD-BSU03910.1~1389	1085.38	-1.31952	0.237809	-5.54867	2.87858e-08	1.58956e-07
ILL.gabP-BSU06310.9~1418	854.279	2.24946	0.308873	7.28281	3.26934e-13	2.87091e-12
ILL.gabR-BSU03890.1~1440	150.405	0.618043	0.293734	2.10409	0.0353707	0.0682019
ILL.gabT-BSU03900.107~1417	99.9708	1.40883	0.363215	3.87876	0.00010499	0.000344359
ILL.galE-BSU38860.1~1020	6796.7	-0.530602	0.18688	-2.83927	0.00452166	0.0107915
ILL.galK-BSU38200.81~1253	901.586	-0.208989	0.204735	-1.02078	0.307359	0.421565
ILL.galT-BSU38190.1~1542	1723.84	-0.292044	0.183374	-1.59261	0.111248	0.182951
ILL.ganA-BSU34130.19~2082	470.803	-0.24414	0.278088	-0.877922	0.379986	0.501315
ILL.ganB-BSU34120.1~1290	124.957	-0.142291	0.311385	-0.456962	0.647698	0.745376
ILL.ganP-BSU34150.1~1257	256.054	-0.374158	0.365032	-1.025	0.305362	0.419754
ILL.ganQ-BSU34140.1~852	138.219	-0.224689	0.354626	-0.633595	0.526345	0.639531
ILL.ganR-BSU34170.44~1036	311.899	0.137448	0.240067	0.572538	0.566958	0.677727
ILL.gapA-BSU33940.13~1020	50193.4	-0.858919	0.193574	-4.43715	9.11571e-06	3.57032e-05
ILL.gapB-BSU29020.36~1058	360.992	-1.29862	0.262498	-4.94714	7.53105e-07	3.44076e-06
ILL.garD-BSU02510.91~1623	465.417	0.879059	0.221556	3.96767	7.25798e-05	0.000245655
ILL.gatA-BSU06680.1~1458	15362.9	-1.12192	0.202808	-5.53193	3.16722e-08	1.73047e-07
ILL.gatB-BSU06690.1~1431	16496.5	-0.984974	0.205167	-4.80084	1.57999e-06	6.90785e-06
ILL.gatC-BSU06670.103~393	3367.11	-1.44283	0.195526	-7.37925	1.59181e-13	1.42197e-12
ILL.gbsA-BSU31060.16~1488	175.607	1.24777	0.294243	4.24062	2.22899e-05	8.25346e-05
ILL.gbsB-BSU31050.1~1209	213.41	0.678532	0.273103	2.48452	0.0129725	0.0281328
ILL.gcp-BSU05940.1~1041	5675.62	2.72886	0.204373	13.3524	1.14724e-40	5.58234e-39
ILL.gcvPA-BSU24560.30~1376	1098.34	0.479578	0.200619	2.3905	0.0168256	0.0354873
ILL.gcvPB-BSU24550.1~1467	1436.19	0.586205	0.192889	3.03908	0.00237302	0.00607351
ILL.gcvT-BSU24570.74~1162	925.846	0.392931	0.212928	1.84537	0.0649831	0.115799
ILL.gdh-BSU03930.1~786	11.2712	0.45538	0.848212	0.53687	0.591357	0.697271
ILL.gerAA-BSU33050.1~1449	13.8225	0.393751	0.761193	0.517282	0.604959	0.709657
ILL.gerAB-BSU33060.1~1098	10.9514	0.559444	0.920533	0.607739	0.54336	0.654288
ILL.gerAC-BSU33070.1~1122	21.3426	0.465214	0.637015	0.730303	0.465205	0.584473
ILL.gerBA-BSU35800.1~1452	17.9735	0.05543	0.674566	0.0821714	0.93451	0.961476
ILL.gerBB-BSU35810.6~1112	37.6263	0.279795	0.5093	0.549372	0.58275	0.689827
ILL.gerBC-BSU35820.1~1125	96.3813	-0.390919	0.355443	-1.09981	0.271415	0.383392
ILL.gerD-BSU01550.1~558	9.81011	-0.850872	0.927593	-0.917291	0.35899	0.480047
ILL.gerE-BSU28410.7~231	483.637	1.41123	0.275969	5.11374	3.15845e-07	1.519e-06
ILL.gerKA-BSU03700.1~1635	59.5355	-0.29648	0.417587	-0.709985	0.477714	0.596745
ILL.gerKB-BSU03720.25~1146	101.561	0.149218	0.373305	0.399722	0.689361	0.779229
ILL.gerKC-BSU03710.1~1224	65.9587	0.196355	0.385922	0.508793	0.610897	0.714961
ILL.gerM-BSU28380.1~1101	92.1155	0.280863	0.338153	0.830579	0.406211	0.52833
ILL.gerPA-BSU10720.1~222	3.35977	0.0670156	1.67806	0.0399363	0.968144	0.982878
ILL.gerPB-BSU10710.1~243	1.73841	-4.43555	2.58916	-1.71313	0.0866895	0.147977
ILL.gerPC-BSU10700.23~640	10.1015	-1.07024	0.918169	-1.16562	0.243767	0.35036
ILL.gerPD-BSU10690.1~177	0.78291	-1.38646	3.12817	-0.443217	0.657609	NA
ILL.gerPE-BSU10680.1~402	5.87017	0.334327	1.16185	0.287753	0.773536	0.843931
ILL.gerPF-BSU10670.23~250	6.92204	-1.56761	1.10215	-1.42231	0.154936	0.241453
ILL.gerT-BSU19490.1~474	3.02684	-0.83676	1.57645	-0.530786	0.595567	0.701385
ILL.ggaA-BSU35690.1106~2446	4680.05	1.29204	0.325121	3.97404	7.06651e-05	0.00023937
ILL.ggaB-BSU35680.1~2703	12937.2	2.31864	0.308163	7.52408	5.30936e-14	4.957e-13
ILL.ggt-BSU18410.21~1784	35.8406	1.56511	0.518452	3.0188	0.00253775	0.00642751
ILL.gid-BSU16130.76~1383	5136.85	1.1436	0.198507	5.76101	8.36127e-09	4.87074e-08
ILL.gidA-BSU41010.1~1887	8093.7	-0.370414	0.19944	-1.85727	0.0632732	0.113146
ILL.gidB-BSU41000.14~733	4037.52	-0.436491	0.230156	-1.8965	0.0578934	0.105344
ILL.glcD-BSU28680.1~1413	7346.98	2.19791	0.23692	9.27702	1.74282e-20	2.5471e-19
ILL.glcF-BSU28690.1~1335	5656.91	2.22659	0.257572	8.64457	5.40103e-18	6.55093e-17
ILL.glcK-BSU24850.11~976	1528.77	0.967807	0.195376	4.95357	7.28633e-07	3.34086e-06
ILL.glcP-BSU10520.29~1234	139.001	0.46302	0.333401	1.38878	0.164901	0.253754
ILL.glcR-BSU36300.21~797	553.479	0.919519	0.211729	4.3429	1.40614e-05	5.39e-05
ILL.glcT-BSU13880.8~874	2003.38	-0.268509	0.220572	-1.21733	0.223479	0.327188
ILL.glcU-BSU03920.1~864	2.71934	-0.0972421	1.70843	-0.056919	0.95461	0.975362
ILL.glgA-BSU30950.1~1455	412.985	2.88419	0.275927	10.4527	1.42378e-25	2.81758e-24
ILL.glgB-BSU30980.17~1900	350.712	3.45134	0.291746	11.83	2.7327e-32	8.19018e-31
ILL.glgC-BSU30970.1~1143	270.374	3.01753	0.288519	10.4587	1.33706e-25	2.6587e-24
ILL.glgD-BSU30960.24~1055	259.711	3.18104	0.298832	10.6449	1.84162e-26	3.94661e-25
ILL.glgP-BSU30940.1~2397	531.13	2.49343	0.231202	10.7847	4.06765e-27	9.09395e-26
ILL.glmM-BSU01770.1~1347	6157.88	-0.261495	0.176512	-1.48146	0.138485	0.219033
ILL.glmS-BSU01780.90~1892	29105.9	-0.613115	0.174153	-3.52056	0.000430637	0.00127496
ILL.glmU-BSU00500.43~1413	15362.5	-1.37259	0.172378	-7.96263	1.68419e-15	1.72421e-14
ILL.glnA-BSU17460.1~1335	35474.6	-0.182982	0.182323	-1.00362	0.315564	0.430182
ILL.glnH-BSU27440.1~822	3.18481	-0.144232	1.54162	-0.0935585	0.92546	0.953826
ILL.glnJ-BSU02440.116~1348	303.699	-0.263184	0.242979	-1.08316	0.278739	0.392532
ILL.glnK-BSU36520.1~351	149.666	-0.481016	0.36488	-1.31828	0.187408	0.281453
ILL.glnL-BSU02450.11~955	350.165	-0.720682	0.238676	-3.0195	0.00253195	0.0064207
ILL.glnM-BSU27450.1~651	0.78291	-1.38646	3.12817	-0.443217	0.657609	NA
ILL.glnP-BSU27460.1~657	2.57449	-0.967052	1.66752	-0.579934	0.561959	0.672725
ILL.glnQ-BSU27430.1~729	0.440751	2.07798	4.89109	0.424851	0.670945	NA
ILL.glnR-BSU17450.1~408	3192.3	-0.233383	0.198891	-1.17342	0.240626	0.34689
ILL.glnT-BSU02420.1~1437	23.0718	-1.14719	0.613728	-1.86922	0.061592	0.110758
ILL.glpD-BSU09300.38~1705	1195.29	0.663851	0.218418	3.03935	0.00237086	0.00607176
ILL.glpF-BSU09280.126~950	1679.34	-1.0453	0.249781	-4.18489	2.85304e-05	0.000103239
ILL.glpG-BSU24870.1~1524	1186.84	1.02384	0.191186	5.35521	8.54579e-08	4.39619e-07
ILL.glpK-BSU09290.1~1491	4969.58	-1.13156	0.210841	-5.36687	8.01142e-08	4.13673e-07
ILL.glpP-BSU09270.1~579	1494.97	0.254632	0.190667	1.33548	0.181719	0.274002
ILL.glpQ-BSU02130.99~980	2610.33	-2.81138	0.286359	-9.81767	9.45053e-23	1.56978e-21
ILL.glpT-BSU02140.1~1335	2527.58	-2.7088	0.278815	-9.7154	2.59234e-22	4.13974e-21
ILL.glpX-BSU37090.31~996	10654.1	0.832045	0.174976	4.7552	1.98255e-06	8.51487e-06
ILL.gltA-BSU18450.47~4609	28643.6	5.02656	0.233695	21.509	1.28193e-102	8.8368e-100
ILL.gltC-BSU18460.31~933	1115.34	0.677524	0.19723	3.43519	0.000592138	0.00171362
ILL.gltD-BSU18440.17~1498	14507.1	5.17516	0.279586	18.5101	1.71134e-76	5.89841e-74
ILL.gltP-BSU02340.1~1245	40.3924	0.516933	0.512292	1.00906	0.312946	0.427262
ILL.gltR-BSU26670.6~896	235.821	-0.478797	0.304307	-1.5734	0.115626	0.188502
ILL.gltT-BSU10220.66~1355	17290.3	-0.763842	0.21885	-3.49025	0.000482573	0.00141655
ILL.gltX-BSU00920.1~1452	14706.7	0.193437	0.175395	1.10287	0.270085	0.382427
ILL.glxK-BSU40040.25~1173	254.782	-0.554579	0.24542	-2.25972	0.0238388	0.0483319
ILL.glyA-BSU36900.1~1248	26856.2	0.311469	0.198704	1.56751	0.116996	0.190286
ILL.glyQ-BSU25270.83~970	3859.63	-0.192951	0.180106	-1.07132	0.284027	0.397733
ILL.glyS-BSU25260.1~2040	9420.01	-0.0482627	0.184216	-0.26199	0.793329	0.858281
ILL.gmk-BSU15680.1~615	6487.25	-0.486702	0.180741	-2.69281	0.00708518	0.0162441
ILL.gmuA-BSU05820.1~333	83.4685	-1.72922	0.374281	-4.62011	3.8354e-06	1.58632e-05
ILL.gmuB-BSU05810.1~312	111.398	-1.85787	0.422269	-4.39974	1.08379e-05	4.19715e-05
ILL.gmuC-BSU05830.1~1329	510.324	-1.73483	0.314731	-5.51209	3.54591e-08	1.92213e-07
ILL.gmuD-BSU05840.1~1398	618.426	-1.63737	0.316669	-5.17061	2.33337e-07	1.13807e-06
ILL.gmuE-BSU05860.29~928	438.463	-1.16786	0.27783	-4.20353	2.62786e-05	9.5592e-05
ILL.gmuF-BSU05870.1~948	406.19	-1.71408	0.374615	-4.57559	4.74887e-06	1.93893e-05
ILL.gmuG-BSU05880.1~1089	515.463	-1.75628	0.296028	-5.93281	2.97801e-09	1.81667e-08
ILL.gmuR-BSU05850.22~735	379.299	-0.938188	0.287805	-3.2598	0.0011149	0.00304571
ILL.gntK-BSU40060.1~1542	691.821	0.237008	0.262331	0.903469	0.366277	0.487113
ILL.gntP-BSU40070.1~1347	2925.26	-0.88453	0.213421	-4.14454	3.40497e-05	0.00012172
ILL.gntR-BSU40050.16~747	187.69	0.178936	0.400387	0.446908	0.654941	0.75162
ILL.gntZ-BSU40080.4~1410	8236.48	-0.985609	0.183745	-5.364	8.1397e-08	4.19773e-07
ILL.gpr-BSU25540.154~1260	174.717	3.20323	0.344085	9.30942	1.2853e-20	1.89182e-19
ILL.gpsA-BSU22830.1~1038	9442.35	0.00560598	0.200792	0.0279194	0.977726	0.987516
ILL.greA-BSU27320.77~550	8658.34	-0.301765	0.197959	-1.52438	0.127413	0.204732
ILL.groEL-BSU06030.1~1635	51235.2	-2.04253	0.386245	-5.28817	1.23544e-07	6.22385e-07
ILL.groES-BSU06020.10~294	8691.41	-2.47426	0.382448	-6.46953	9.83088e-11	7.13343e-10
ILL.grpE-BSU25480.1~564	5861.78	-1.12664	0.180636	-6.23707	4.45834e-10	3.02787e-09
ILL.gsaB-BSU08710.23~1312	3177.3	-0.473562	0.189758	-2.49561	0.012574	0.027402
ILL.gsiB-BSU04400.13~384	26.9412	2.08939	0.626144	3.33692	0.000847121	0.00238671
ILL.gspA-BSU38430.1~861	96.0887	0.496456	0.425168	1.16767	0.24294	0.349617
ILL.gtaB-BSU35670.73~951	9036.26	-0.714252	0.21662	-3.29725	0.000976354	0.00270476
ILL.guaA-BSU06360.88~1629	28700.6	-0.171309	0.18426	-0.929713	0.35252	0.472616
ILL.guaB-BSU00090.1~1467	47274.7	0.125055	0.179833	0.695393	0.486809	0.60468
ILL.guaC-BSU32130.44~1024	699.842	-1.97197	0.236749	-8.32938	8.12665e-17	9.01406e-16
ILL.guaD-BSU13170.125~595	58.7587	1.55476	0.462372	3.36258	0.000772168	0.00218746
ILL.gudB-BSU22960.39~1322	19794.9	-0.41074	0.189908	-2.16284	0.0305537	0.0603199
ILL.gudD-BSU02490.1~1368	44.6673	1.45435	0.487186	2.98521	0.00283386	0.00708636
ILL.gudP-BSU02480.1~1368	99.082	1.09307	0.355058	3.07856	0.00208002	0.0054131
ILL.gutB-BSU06150.109~1170	217.357	-0.422069	0.257138	-1.64141	0.100713	0.168575
ILL.gutP-BSU06160.74~1465	120.539	0.718819	0.32515	2.21073	0.0270547	0.0541617
ILL.gutR-BSU06140.4~2493	1365.85	-0.473966	0.212764	-2.22766	0.0259033	0.0520331
ILL.gyrA-BSU00070.211~2676	31559.5	0.273017	0.200422	1.36221	0.173131	0.263551
ILL.gyrB-BSU00060.17~1933	18382.4	0.275784	0.196612	1.40268	0.160712	0.248766
ILL.hag-BSU35360.95~1009	299027	2.24636	0.257278	8.73126	2.51859e-18	3.13762e-17
ILL.hbs-BSU22790.200~478	60382	-1.15058	0.200802	-5.72994	1.00464e-08	5.81958e-08
ILL.helD-BSU33450.54~2378	2893.94	-1.04773	0.179639	-5.83241	5.46318e-09	3.26528e-08
ILL.hemA-BSU28170.75~1442	4196.52	0.210797	0.19185	1.09876	0.271872	0.383776
ILL.hemAT-BSU10380.1~1299	6517.08	1.56426	0.184463	8.48007	2.25057e-17	2.62948e-16
ILL.hemB-BSU28130.1~975	4126	1.18719	0.192638	6.16281	7.14663e-10	4.76749e-09
ILL.hemC-BSU28150.33~977	2524.76	1.25231	0.184847	6.77484	1.24547e-11	9.77466e-11
ILL.hemD-BSU12230.39~851	1367.04	0.455722	0.251707	1.81052	0.0702148	0.12342
ILL.hemD-BSU28140.1~789	2096.64	1.07375	0.195412	5.49483	3.91098e-08	2.11448e-07
ILL.hemE-BSU10120.38~1099	1682.45	-0.826619	0.193456	-4.2729	1.92951e-05	7.23523e-05
ILL.hemH-BSU10130.1~933	2091.32	-0.793919	0.183231	-4.33289	1.47164e-05	5.62542e-05
ILL.hemL-BSU28120.1~1293	8798.72	1.07203	0.183362	5.84654	5.01914e-09	3.01732e-08
ILL.hemN-BSU25500.53~1192	1923.29	1.10508	0.19795	5.58261	2.36938e-08	1.31894e-07
ILL.hemX-BSU28160.1~831	1460.15	1.27363	0.201365	6.325	2.53225e-10	1.77816e-09
ILL.hemY-BSU10140.1~1413	2383.45	-0.488517	0.207097	-2.35888	0.01833	0.0383281
ILL.hemZ-BSU09840.2~1507	2470.77	-0.403382	0.20253	-1.99171	0.0464028	0.087
ILL.hepS-BSU22760.164~919	5654.39	0.155957	0.199821	0.780485	0.435105	0.555774
ILL.hepT-BSU22740.1~1047	6701.3	0.136548	0.174177	0.78396	0.433063	0.554192
ILL.hfq-BSU17340.1~222	311.148	0.387172	0.349296	1.10843	0.267675	0.379274
ILL.hinT-BSU10030.29~466	1449.19	-1.33599	0.273927	-4.87718	1.07611e-06	4.80648e-06
ILL.hisA-BSU34880.1~738	62.4152	0.569845	0.41632	1.36877	0.171073	0.261378
ILL.hisB-BSU34900.1~585	36.9127	-0.0620287	0.514048	-0.120667	0.903955	0.937183
ILL.hisC-BSU22620.1~1083	5497.72	0.622624	0.178751	3.48319	0.000495474	0.0014503
ILL.hisD-BSU34910.1~1284	57.3973	1.00618	0.422566	2.38111	0.0172607	0.0363308
ILL.hisF-BSU34870.1~759	55.4441	0.267626	0.417156	0.641547	0.521167	0.635667
ILL.hisG-BSU34920.1~642	26.0168	0.395648	0.57475	0.688383	0.491211	0.609008
ILL.hisH-BSU34890.1~639	35.1548	1.05386	0.532775	1.97806	0.0479223	0.0893627
ILL.hisI-BSU34860.1~630	68.7107	0.339605	0.409988	0.828329	0.407484	0.529486
ILL.hisJ-BSU29620.197~1003	1790.97	1.12965	0.222924	5.06743	4.03215e-07	1.91689e-06
ILL.hisS-BSU27560.90~1364	2527.39	-1.64175	0.251964	-6.51579	7.23094e-11	5.32156e-10
ILL.hisZ-BSU34930.51~1226	39.7385	-0.0772673	0.48888	-0.15805	0.874418	0.916986
ILL.hmp-BSU13040.13~1212	43.6081	1.0728	0.472723	2.2694	0.0232439	0.0472184
ILL.holA-BSU25560.25~1068	1238.52	0.19133	0.208806	0.916303	0.359508	0.480428
ILL.holB-BSU00310.12~1001	4048.36	0.409323	0.193676	2.11345	0.0345626	0.0668487
ILL.hom-BSU32260.1~1302	9978.58	3.03019	0.236827	12.7949	1.74989e-37	7.09562e-36
ILL.hpr-BSU09990.41~652	3155.53	1.26396	0.212066	5.9602	2.51934e-09	1.5529e-08
ILL.hprK-BSU35000.35~967	2956.54	-0.0710571	0.212775	-0.333955	0.738414	0.818788
ILL.hprP-BSU34970.1~651	2733.61	-0.0976792	0.187773	-0.5202	0.602924	0.70904
ILL.hprT-BSU00680.1~543	4267.26	-0.687891	0.184286	-3.73273	0.000189415	0.000593949
ILL.hrcA-BSU25490.1~1032	3851.8	0.0015136	0.220059	0.00687815	0.994512	0.995957
ILL.hslO-BSU00710.12~887	3304.3	-0.459814	0.181386	-2.535	0.0112447	0.0247515
ILL.hslU-BSU16160.17~1420	11868	0.261942	0.176767	1.48185	0.13838	0.218989
ILL.htpG-BSU39820.83~1963	7841.12	-1.04441	0.242232	-4.31163	1.62054e-05	6.15476e-05
ILL.htrA-BSU12900.43~1392	1072.24	-0.117384	0.191223	-0.61386	0.539308	0.650884
ILL.htrB-BSU33000.1~1377	1540.32	0.0448426	0.198966	0.225378	0.821685	0.879982
ILL.htrC-BSU40360.1~1203	3923.8	0.645485	0.200151	3.22499	0.00125975	0.00340767
ILL.hutG-BSU39380.1~960	246.435	2.79249	0.278939	10.0111	1.36221e-23	2.36727e-22
ILL.hutH-BSU39350.1~1527	200.54	4.64472	0.404242	11.49	1.48174e-30	3.95387e-29
ILL.hutI-BSU39370.13~1278	340.462	2.64993	0.251588	10.5328	6.09768e-26	1.24851e-24
ILL.hutM-BSU39390.1~1428	128.334	2.68357	0.339811	7.89724	2.85149e-15	2.86953e-14
ILL.hutP-BSU39340.3~458	311.262	2.26388	0.268601	8.4284	3.50419e-17	4.02592e-16
ILL.hutU-BSU39360.1~1659	384.14	2.68329	0.242348	11.072	1.71498e-28	4.07652e-27
ILL.hxlA-BSU03460.8~640	325.388	-0.379912	0.244163	-1.55597	0.119714	0.19402
ILL.hxlB-BSU03450.1~558	258.219	-0.462401	0.285857	-1.61759	0.105751	0.175234
ILL.hxlR-BSU03470.135~497	116.384	-1.57841	0.333179	-4.73741	2.16469e-06	9.24913e-06
ILL.icd-BSU29130.1~1272	34020.8	0.600598	0.206996	2.9015	0.00371385	0.00901967
ILL.ileS-BSU15430.53~2818	13245.8	-2.88683	0.223391	-12.9227	3.35036e-38	1.44345e-36
ILL.ilvA-BSU21770.23~1291	8715.78	4.12917	0.243205	16.9781	1.19205e-64	2.73906e-62
ILL.ilvB-BSU28310.122~1846	1034.3	3.63469	0.239348	15.1858	4.39246e-52	4.03716e-50
ILL.ilvC-BSU28290.24~1052	918.592	4.13823	0.293546	14.0974	3.94163e-45	2.39744e-43
ILL.ilvD-BSU21870.166~1842	10689.8	5.86164	0.299199	19.5911	1.84158e-85	9.52099e-83
ILL.ilvH-BSU28300.1~519	213.063	3.53767	0.345331	10.2443	1.25565e-24	2.34993e-23
ILL.immA-BSU04810.1~510	201.266	-0.629388	0.322732	-1.95019	0.0511537	0.0944096
ILL.immR-BSU04820.25~408	295.834	-0.730719	0.283042	-2.58167	0.00983248	0.0219348
ILL.infA-BSU01390.1~219	18106.4	-0.568588	0.304609	-1.86661	0.0619554	0.11117
ILL.infB-BSU16630.1~2151	52357.5	1.92293	0.181148	10.6152	2.53179e-26	5.39767e-25
ILL.infC-BSU28870.59~580	27370.4	-1.06057	0.240564	-4.40868	1.04001e-05	4.03894e-05
ILL.iolB-BSU39750.1~816	234.002	0.595196	0.325086	1.83089	0.0671169	0.118987
ILL.iolC-BSU39740.1~978	249.984	0.384674	0.324447	1.18563	0.235768	0.341673
ILL.iolD-BSU39730.1~1914	590.219	0.382577	0.286411	1.33576	0.181627	0.273987
ILL.iolE-BSU39720.1~894	238.303	0.16371	0.301654	0.542707	0.587331	0.693661
ILL.iolF-BSU39710.1~1317	358.179	-0.147589	0.300404	-0.4913	0.623214	0.725271
ILL.iolG-BSU39700.1~1035	315.73	-0.240722	0.313589	-0.767634	0.442704	0.563566
ILL.iolH-BSU39690.1~870	245.703	-0.48262	0.27111	-1.78017	0.0750488	0.130751
ILL.iolI-BSU39680.86~922	267.652	-0.0404012	0.279321	-0.144641	0.884994	0.925262
ILL.iolJ-BSU39670.21~893	275.066	-0.0351848	0.250517	-0.140449	0.888305	0.927477
ILL.iolR-BSU39770.17~772	970.808	-0.533218	0.246162	-2.16612	0.0303017	0.059851
ILL.iolS-BSU39780.28~960	2384.47	-0.910954	0.185487	-4.91114	9.05473e-07	4.08401e-06
ILL.iolT-BSU06230.1~1422	55.4431	-0.312372	0.463881	-0.673388	0.500701	0.617073
ILL.ipi-BSU11130.4~363	430.316	-1.0164	0.219069	-4.63961	3.4906e-06	1.45097e-05
ILL.ipk-BSU00460.22~891	2832.86	-0.505294	0.2049	-2.46606	0.013661	0.0294588
ILL.iscS-BSU27510.1~1140	3394.85	-0.507335	0.20899	-2.42755	0.0152012	0.0324586
ILL.iscS-BSU29590.84~1229	1593.01	-0.273294	0.18993	-1.43892	0.150173	0.234827
ILL.iscU-BSU32680.1~444	10410	0.100827	0.181371	0.555917	0.578268	0.686745
ILL.iseA-BSU18380.25~570	362.447	-0.712256	0.288119	-2.47209	0.0134327	0.0289967
ILL.ispA-BSU13190.33~992	33.9091	0.557885	0.530641	1.05134	0.293101	0.407759
ILL.ispA-BSU24280.1~891	1772.38	0.242367	0.231953	1.04489	0.296072	0.410648
ILL.ispD-BSU00900.15~713	1225.75	0.514699	0.20901	2.46256	0.013795	0.0297012
ILL.ispF-BSU00910.1~477	522.931	0.769154	0.266123	2.89022	0.00384974	0.00932232
ILL.ispG-BSU25070.1~1134	5738.68	-0.0844841	0.200856	-0.42062	0.674033	0.766948
ILL.ispH-BSU25160.84~1028	2525.95	-0.259243	0.189878	-1.36531	0.172156	0.262467
ILL.jag-BSU41030.1~627	9188.54	-2.04231	0.190844	-10.7015	1.00197e-26	2.20434e-25
ILL.kamA-BSU19690.29~1444	15.2458	0.320445	0.741781	0.431993	0.665746	0.760407
ILL.kapB-BSU31460.1~387	288.577	-0.685829	0.294523	-2.32861	0.0198798	0.041132
ILL.kapD-BSU31470.15~632	70.6196	0.973133	0.381825	2.54863	0.0108146	0.0239321
ILL.katA-BSU08820.10~1461	3085.57	0.00807299	0.193883	0.0416384	0.966787	0.982223
ILL.katE-BSU39050.4~2064	52.8789	0.567265	0.450834	1.25826	0.208299	0.308679
ILL.katX-BSU38630.30~1673	25.8789	-0.0194579	0.566305	-0.0343594	0.972591	0.985033
ILL.kbaA-BSU01560.110~706	404.278	-0.867062	0.239821	-3.61545	0.000299824	0.000913833
ILL.kbl-BSU17000.1~1179	823.647	-1.75867	0.289214	-6.08088	1.19525e-09	7.71227e-09
ILL.kdgA-BSU22100.2~592	124.804	0.157972	0.330056	0.478622	0.632207	0.73285
ILL.kdgK-BSU22110.1~975	364.002	0.493597	0.243153	2.02999	0.0423577	0.0804296
ILL.kdgR-BSU22120.34~1053	477.506	0.370447	0.246235	1.50444	0.132467	0.211456
ILL.kdgT-BSU22090.1~993	269.752	-0.0722708	0.259414	-0.278593	0.780558	0.849352
ILL.kduD-BSU22140.2~766	505.379	0.677442	0.242309	2.79577	0.00517756	0.0121466
ILL.kduI-BSU22130.51~878	678.701	0.525242	0.221627	2.36994	0.017791	0.0373332
ILL.khtS-BSU09870.5~343	133.244	-1.35955	0.370747	-3.66707	0.000245349	0.000760692
ILL.khtT-BSU09860.11~508	115.204	-1.59859	0.439411	-3.63803	0.000274726	0.000846067
ILL.kinA-BSU13990.51~1871	326.808	0.625046	0.27786	2.2495	0.0244807	0.0494878
ILL.kinB-BSU31450.14~1300	325.378	0.451247	0.260091	1.73496	0.0827484	0.142384
ILL.kinC-BSU14490.13~1299	1910.89	0.169723	0.191524	0.886173	0.375524	0.497332
ILL.kinD-BSU13660.1~1521	2854.39	1.13771	0.191086	5.95391	2.61809e-09	1.60659e-08
ILL.kinE-BSU13530.17~2233	309.61	1.9375	0.329545	5.87932	4.11953e-09	2.48373e-08
ILL.kipA-BSU04090.3~1010	1006.73	1.98478	0.214724	9.24341	2.38764e-20	3.42891e-19
ILL.kipI-BSU04080.1~723	678.03	2.39104	0.234143	10.2119	1.75439e-24	3.22496e-23
ILL.kipR-BSU04100.8~760	702.56	1.87566	0.208347	9.00255	2.2054e-19	2.97118e-18
ILL.ksgA-BSU00420.1~879	3431.08	0.0844539	0.193889	0.435579	0.663142	0.75852
ILL.ktrA-BSU31090.73~741	355.791	-0.329351	0.236466	-1.3928	0.16368	0.252604
ILL.ktrB-BSU31100.7~1344	712.859	-0.370064	0.200834	-1.84264	0.0653818	0.116453
ILL.ktrC-BSU14510.1~666	2551.67	0.364292	0.179696	2.02727	0.0426347	0.0808514
ILL.ktrD-BSU13500.17~1366	2352.36	0.0252422	0.203084	0.124294	0.901082	0.935696
ILL.lcfA-BSU28560.27~1709	906.799	-0.148902	0.199253	-0.747299	0.454883	0.574297
ILL.lctP-BSU03060.1~1626	339.013	0.536839	0.245147	2.18987	0.028534	0.0568207
ILL.ldh-BSU03050.54~1019	229.67	0.109912	0.283822	0.387256	0.698567	0.786411
ILL.lepA-BSU25510.24~1862	9955.06	-0.598866	0.18105	-3.30774	0.000940533	0.00261603
ILL.leuA-BSU28280.1~1557	646.141	3.33933	0.274217	12.1777	4.08636e-34	1.32421e-32
ILL.leuB-BSU28270.1~1098	449.549	3.16533	0.325136	9.73542	2.12943e-22	3.44037e-21
ILL.leuC-BSU28260.50~1468	886.092	3.01553	0.271377	11.112	1.09707e-28	2.65349e-27
ILL.leuD-BSU28250.1~600	248.211	2.8412	0.3355	8.46853	2.48504e-17	2.88711e-16
ILL.leuS-BSU30320.110~2524	12327.6	-1.03681	0.180863	-5.73259	9.89079e-09	5.73749e-08
ILL.levB-BSU34460.1~1551	36.447	1.38204	0.596406	2.31729	0.0204881	0.0423059
ILL.levD-BSU27070.11~451	27.224	0.456786	0.630605	0.724362	0.468843	0.587261
ILL.levE-BSU27060.1~489	30.8595	0.680452	0.613685	1.1088	0.267518	0.379182
ILL.levF-BSU27050.12~821	38.0814	0.698857	0.503236	1.38873	0.164916	0.253754
ILL.levG-BSU27040.21~848	51.5772	0.738921	0.431724	1.71156	0.086978	0.148408
ILL.levR-BSU27080.203~3010	428.768	0.755321	0.250972	3.00959	0.00261603	0.00659751
ILL.lexA-BSU17850.18~635	4240.32	0.218796	0.17952	1.21879	0.222925	0.32661
ILL.lgt-BSU34990.14~823	2939.33	-0.0321481	0.17882	-0.179778	0.857326	0.903875
ILL.liaF-BSU33100.34~759	625.886	0.0979141	0.205382	0.476741	0.633546	0.733991
ILL.liaG-BSU33110.61~933	882.523	0.169432	0.217898	0.777575	0.43682	0.557447
ILL.liaH-BSU33120.27~704	315.951	-1.03039	0.23968	-4.29903	1.71546e-05	6.47368e-05
ILL.liaI-BSU33130.9~389	111.388	-0.734933	0.315321	-2.33074	0.0197669	0.0409901
ILL.liaR-BSU33080.1~636	468.319	0.172552	0.218701	0.788986	0.43012	0.551108
ILL.liaS-BSU33090.1~1083	958.46	0.135869	0.195971	0.69331	0.488115	0.606077
ILL.licA-BSU38570.1~333	50.7114	-2.02998	0.51266	-3.95971	7.50414e-05	0.000253571
ILL.licB-BSU38590.126~434	48.1753	-0.830303	0.525777	-1.57919	0.114292	0.186825
ILL.licC-BSU38580.1~1359	182.319	-0.933249	0.440749	-2.11742	0.0342246	0.0663285
ILL.licH-BSU38560.1~1329	348.264	-1.26676	0.355616	-3.56215	0.000367833	0.00110163
ILL.licR-BSU38600.63~1988	896.794	-0.116445	0.255521	-0.455716	0.648594	0.745577
ILL.licT-BSU39080.1~834	995.876	0.800046	0.211667	3.77974	0.000156991	0.000497942
ILL.ligA-BSU06620.24~2030	4707.24	-0.413183	0.184335	-2.24148	0.0249951	0.0504785
ILL.ligB-BSU20500.59~871	24.2829	1.53921	0.614263	2.50578	0.0122183	0.0266956
ILL.ligD-BSU13400.4~1839	599.637	2.8622	0.2243	12.7606	2.72229e-37	1.09314e-35
ILL.lipA-BSU32330.39~935	8745.42	0.22972	0.201225	1.14161	0.253617	0.362255
ILL.lipC-BSU04110.64~705	594.623	1.55669	0.242181	6.42781	1.29452e-10	9.36035e-10
ILL.lmrA-BSU02680.26~592	576.988	-0.326071	0.256323	-1.27211	0.203334	0.302841
ILL.lmrB-BSU02670.40~1479	1402.59	-0.561619	0.226466	-2.47992	0.0131411	0.0284413
ILL.lonA-BSU28200.88~2412	8016.51	-0.114701	0.208902	-0.549064	0.582961	0.689879
ILL.lonB-BSU28210.1~1659	380.245	3.18047	0.259816	12.2413	1.87059e-34	6.29005e-33
ILL.lpdV-BSU24060.1~1425	2031.06	-1.16736	0.2231	-5.23247	1.67264e-07	8.25541e-07
ILL.lplA-BSU07100.1~1509	34.6922	-0.619976	0.523257	-1.18484	0.236081	0.342008
ILL.lplB-BSU07110.1~957	23.0587	-0.669454	0.626368	-1.06879	0.285165	0.398865
ILL.lplC-BSU07120.1~888	37.5099	0.565935	0.504448	1.12189	0.261909	0.372381
ILL.lplD-BSU07130.9~1349	88.876	0.198792	0.344686	0.576735	0.564118	0.674528
ILL.lrgB-BSU38330.1~678	1362.42	-0.742025	0.368633	-2.01291	0.044124	0.0832179
ILL.lrpA-BSU05050.5~415	290.019	-1.32878	0.367944	-3.61137	0.000304584	0.000926975
ILL.lrpB-BSU05060.52~501	82.5248	-0.763059	0.420111	-1.81633	0.0693202	0.122269
ILL.lrpC-BSU04250.12~446	339.235	0.541428	0.243786	2.22091	0.0263568	0.0528926
ILL.lspA-BSU15450.21~485	1350.64	-0.844617	0.197418	-4.27833	1.88302e-05	7.06731e-05
ILL.ltaSA-BSU07260.268~2187	13869.9	-0.823965	0.174659	-4.71755	2.38696e-06	1.01673e-05
ILL.luxS-BSU30670.2~475	2574.94	0.414797	0.248481	1.66933	0.0950514	0.16007
ILL.lysA-BSU23380.1~1320	7874.59	1.54923	0.206634	7.49746	6.50668e-14	5.99368e-13
ILL.lysC-BSU28470.126~1352	1252.22	-0.456896	0.246006	-1.85725	0.0632752	0.113146
ILL.lysP-BSU33330.104~1513	3871.6	1.23323	0.216178	5.7047	1.16551e-08	6.72323e-08
ILL.lysS-BSU00820.1~1500	15084.2	0.390294	0.172535	2.26212	0.0236902	0.0480778
ILL.lytA-BSU35640.21~329	2044.36	1.53838	0.18946	8.11984	4.66804e-16	4.92526e-15
ILL.lytB-BSU35630.1~2118	13339.1	1.91316	0.173419	11.032	2.67766e-28	6.32847e-27
ILL.lytC-BSU35620.39~1529	12202	2.09304	0.180499	11.5958	4.32734e-31	1.2012e-29
ILL.lytD-BSU35780.44~2686	15257.1	1.57012	0.172968	9.07751	1.11088e-19	1.54701e-18
ILL.lytE-BSU09420.1~1005	2022.81	0.63164	0.191289	3.30202	0.000959896	0.00266095
ILL.lytF-BSU09370.153~1619	15926.8	1.74844	0.206461	8.46866	2.48228e-17	2.88711e-16
ILL.lytG-BSU31120.21~869	1972.09	-0.248624	0.182105	-1.36528	0.172165	0.262467
ILL.lytH-BSU32340.166~1146	93.8481	-1.19564	0.360034	-3.32092	0.000897227	0.00250569
ILL.lytR-BSU35650.39~959	3243.38	-0.538147	0.197755	-2.72128	0.0065029	0.0150006
ILL.lytS-BSU28930.82~1863	1315.6	0.825196	0.199309	4.14028	3.46888e-05	0.000123684
ILL.lytT-BSU28920.1~726	689.314	0.292818	0.20998	1.39451	0.163165	0.251911
ILL.maa-BSU40850.1~555	104.151	0.635949	0.324459	1.96003	0.0499924	0.0925138
ILL.maeN-BSU31580.154~1500	1462.21	0.349282	0.237277	1.47204	0.141009	0.222431
ILL.maf-BSU28050.26~595	1163.7	-1.17422	0.219895	-5.33992	9.29893e-08	4.75995e-07
ILL.malA-BSU08180.1~1350	498.773	-0.322093	0.213685	-1.50733	0.131727	0.210519
ILL.malL-BSU34560.1~1686	236.52	0.392471	0.256714	1.52882	0.126308	0.203194
ILL.malP-BSU08200.1~1584	162.551	-0.787586	0.307907	-2.55787	0.0105316	0.0233934
ILL.malQ-BSU08210.1~1722	269.144	-1.09493	0.25345	-4.32012	1.55943e-05	5.94454e-05
ILL.malR-BSU08190.11~775	167.479	-0.270953	0.310642	-0.872238	0.383079	0.50459
ILL.malS-BSU29880.82~1782	3585.54	0.810966	0.192296	4.21728	2.47269e-05	9.02651e-05
ILL.manA-BSU12020.1~948	2880.56	-5.32867	0.398538	-13.3705	8.98973e-41	4.53433e-39
ILL.manP-BSU12010.1~1953	4627.95	-5.00999	0.393147	-12.7433	3.39714e-37	1.35102e-35
ILL.manR-BSU12000.1~1947	1457.5	-3.33284	0.305082	-10.9244	8.8125e-28	2.01373e-26
ILL.mapA-BSU01380.1~747	73219.6	-0.360974	0.281723	-1.28131	0.200086	0.298433
ILL.mbl-BSU36410.10~1011	13794.6	-1.25744	0.201038	-6.25475	3.98144e-10	2.73542e-09
ILL.mccA-BSU27260.58~981	408.359	-0.940797	0.321483	-2.92643	0.00342878	0.00841129
ILL.mcpA-BSU31240.1~1986	20428.5	2.28966	0.199727	11.464	2.00135e-30	5.30615e-29
ILL.mcpB-BSU31260.1~1989	15868.3	2.59482	0.205214	12.6444	1.20099e-36	4.51572e-35
ILL.mcpC-BSU13950.3~1970	15084	2.6289	0.198311	13.2564	4.14269e-40	1.92519e-38
ILL.mcsA-BSU00840.14~571	778.973	-0.410166	0.261343	-1.56945	0.116543	0.189697
ILL.mcsB-BSU00850.1~1092	2405.77	-0.208175	0.225013	-0.92517	0.354878	0.475469
ILL.mdh-BSU29120.44~982	27848.4	0.621522	0.204592	3.03786	0.00238262	0.00609056
ILL.mdr-BSU03070.7~1545	3827.56	-0.464826	0.203352	-2.28582	0.022265	0.0454949
ILL.mdxD-BSU34620.1~1770	164.203	1.61338	0.306515	5.26364	1.41234e-07	7.06338e-07
ILL.mdxE-BSU34610.1~1254	138.275	0.599831	0.353899	1.69492	0.0900907	0.152899
ILL.mdxF-BSU34600.1~1308	117.587	0.390739	0.354704	1.10159	0.27064	0.382806
ILL.mdxG-BSU34590.1~837	60.7366	0.506385	0.445725	1.13609	0.255917	0.365026
ILL.mdxR-BSU34630.1~951	66.3085	4.10005	0.550511	7.44772	9.49705e-14	8.69022e-13
ILL.mecA-BSU11520.28~684	3099.02	0.016462	0.231598	0.0710802	0.943334	0.967906
ILL.med-BSU11300.33~986	3498.96	-0.413735	0.182035	-2.27283	0.0230366	0.0468894
ILL.melA-BSU30300.1~1299	293.236	0.213753	0.255865	0.835413	0.403485	0.525834
ILL.menA-BSU38490.73~1008	2810.64	-0.571919	0.208188	-2.74713	0.0060119	0.0139223
ILL.menB-BSU30800.35~850	8149.77	-0.78738	0.176235	-4.46779	7.903e-06	3.12494e-05
ILL.menC-BSU30780.1~1116	2336.38	1.6803	0.183682	9.14788	5.80631e-20	8.16833e-19
ILL.menD-BSU30820.1~1743	2615.72	-0.322299	0.197115	-1.63508	0.102032	0.170556
ILL.menE-BSU30790.91~1551	3515.6	1.58141	0.202743	7.80006	6.18759e-15	6.0933e-14
ILL.menF-BSU30830.82~1497	3763.5	-0.555667	0.176914	-3.14088	0.00168442	0.004463
ILL.metA-BSU21910.73~978	1694.71	0.605172	0.223189	2.71148	0.00669831	0.0154427
ILL.metE-BSU13180.67~2355	3182.73	4.4696	0.325279	13.7408	5.78119e-43	3.10532e-41
ILL.metK-BSU30550.168~1370	14845.7	-1.44031	0.181603	-7.93111	2.17191e-15	2.20713e-14
ILL.metN-BSU32730.1~825	7060.7	-0.964701	0.206081	-4.68117	2.85249e-06	1.20142e-05
ILL.metP-BSU32740.1~669	2238.25	-0.880788	0.208035	-4.23384	2.29738e-05	8.48389e-05
ILL.metQ-BSU32750.106~1131	3084.84	-1.07286	0.179418	-5.97967	2.23586e-09	1.38852e-08
ILL.metS-BSU00380.90~2084	9056.09	-0.527318	0.188126	-2.80301	0.00506282	0.0119179
ILL.mfd-BSU00550.70~3603	10030.5	0.480423	0.173146	2.77468	0.00552563	0.0128973
ILL.mgsA-BSU22480.16~429	536.126	-0.230675	0.259436	-0.88914	0.373928	0.495694
ILL.mgsR-BSU24770.18~398	29.7769	1.5078	0.592999	2.54267	0.0110009	0.0242925
ILL.mgtE-BSU13300.297~1652	6774.08	0.673755	0.278879	2.41594	0.0156946	0.0333915
ILL.mhqA-BSU12870.16~966	186.555	0.18362	0.266875	0.688037	0.491429	0.609095
ILL.mhqR-BSU13670.51~488	1676.31	-1.62168	0.193311	-8.38896	4.90442e-17	5.57272e-16
ILL.miaA-BSU17330.7~951	1092.33	-0.152303	0.193489	-0.787137	0.431202	0.551981
ILL.minC-BSU28000.1~681	5881.06	-0.377358	0.207406	-1.81941	0.0688484	0.121691
ILL.minD-BSU27990.2~808	6567.25	-0.2708	0.176815	-1.53155	0.125635	0.202504
ILL.minJ-BSU35220.21~1214	5148.2	0.661089	0.21451	3.08185	0.0020572	0.00536142
ILL.mleA-BSU23550.16~1335	15609.6	-3.18203	0.210105	-15.145	8.17516e-52	7.35053e-50
ILL.mleN-BSU23560.40~1446	12237.6	-3.33925	0.20634	-16.1833	6.61937e-59	1.09511e-56
ILL.mlpA-BSU16710.9~1238	10365.5	2.51673	0.187576	13.4171	4.80271e-41	2.483e-39
ILL.mmgA-BSU24170.1~1182	23.4397	3.96455	0.870379	4.55497	5.23922e-06	2.12029e-05
ILL.mmgB-BSU24160.1~864	21.7762	2.59597	0.720045	3.60529	0.000311808	0.000947567
ILL.mmgC-BSU24150.1~1140	24.3783	2.49342	0.673988	3.6995	0.000216025	0.000672295
ILL.mmgD-BSU24140.1~1119	31.0802	1.84129	0.602558	3.0558	0.00224464	0.00579154
ILL.mmr-BSU37570.1~1401	4292.62	-0.325125	0.318471	-1.02089	0.307305	0.421565
ILL.mmsA-BSU39760.173~1636	608.149	0.436292	0.261788	1.66658	0.0955976	0.160794
ILL.mmuM-BSU02410.6~953	748.835	2.42789	0.319034	7.61014	2.73795e-14	2.59728e-13
ILL.mnaA-BSU35660.20~1162	1800.1	-0.788934	0.187544	-4.20666	2.59171e-05	9.44434e-05
ILL.mnmA-BSU27500.29~1144	4279.85	-0.551176	0.235524	-2.34021	0.0192729	0.0400768
ILL.mntA-BSU30770.135~1055	1254.35	0.392636	0.351762	1.1162	0.264337	0.375189
ILL.mntB-BSU30760.1~753	755.091	0.792456	0.338998	2.33764	0.0194059	0.0403332
ILL.mntC-BSU30750.4~1311	1316.98	0.751056	0.325065	2.31048	0.0208615	0.0430125
ILL.mntD-BSU30740.1~888	1076.08	0.674054	0.318889	2.11376	0.0345359	0.0668487
ILL.mntH-BSU04360.29~1306	6007.83	-0.0968582	0.206109	-0.469936	0.638401	0.737343
ILL.mntR-BSU24520.1~429	2962.75	-0.741712	0.198883	-3.72938	0.000191949	0.000601439
ILL.moaA-BSU36700.16~1041	1819.02	0.0481432	0.186212	0.258539	0.795991	0.859811
ILL.moaB-BSU29460.85~597	2195.21	1.46912	0.235037	6.2506	4.08876e-10	2.80449e-09
ILL.moaC-BSU05960.1~513	809.786	-0.663202	0.215523	-3.07718	0.0020897	0.00542901
ILL.moaD-BSU14310.1~234	230.772	-0.288543	0.256286	-1.12586	0.260223	0.370493
ILL.moaE-BSU14300.1~474	524.202	-0.176838	0.215394	-0.820997	0.411648	0.533055
ILL.mobA-BSU14260.11~610	377.079	-0.75735	0.225342	-3.36089	0.000776916	0.00219705
ILL.mobB-BSU14290.1~522	616.994	-0.0841099	0.212332	-0.396124	0.692013	0.78052
ILL.moeA-BSU14280.18~1310	1385.57	-0.0917498	0.193981	-0.472983	0.636225	0.736269
ILL.moeB-BSU14270.1~1020	985.748	-0.24506	0.192826	-1.27089	0.203769	0.30327
ILL.motA-BSU13690.22~834	7153.88	2.01483	0.241895	8.32934	8.12922e-17	9.01406e-16
ILL.motB-BSU13680.1~786	9020.03	2.01846	0.245475	8.22266	1.99035e-16	2.1778e-15
ILL.mpr-BSU02240.35~976	771.363	2.24412	0.22445	9.99832	1.55004e-23	2.66015e-22
ILL.mprF-BSU08425.39~2609	3932.62	-0.384337	0.184269	-2.08574	0.0370018	0.071115
ILL.mraW-BSU15140.70~1005	7312.42	-0.0201353	0.185941	-0.108289	0.913767	0.944728
ILL.mraY-BSU15190.112~1086	4369.97	-0.42901	0.198733	-2.15873	0.0308715	0.060721
ILL.mreB-BSU28030.1~1014	9543.49	-0.459867	0.174134	-2.64088	0.00826913	0.0187712
ILL.mreBH-BSU14470.31~1038	96.0567	-0.843487	0.345399	-2.44206	0.0146036	0.0312793
ILL.mreC-BSU28020.1~873	8348.67	-0.502396	0.182754	-2.74903	0.00597721	0.0138497
ILL.mreD-BSU28010.1~519	2448.12	-0.527897	0.246992	-2.13731	0.0325731	0.0635483
ILL.mrgA-BSU32990.1~462	3551.52	-1.4004	0.428504	-3.26812	0.00108264	0.0029674
ILL.mrnC-BSU00950.4~435	723.821	0.447858	0.207468	2.15869	0.0308743	0.060721
ILL.mrpA-BSU31600.59~2464	3500.27	-1.09483	0.217757	-5.02775	4.96262e-07	2.31926e-06
ILL.mrpB-BSU31610.1~432	492.669	-0.669463	0.259975	-2.5751	0.0100211	0.0223194
ILL.mrpC-BSU31620.1~342	287.648	-0.748407	0.257452	-2.90698	0.00364942	0.00888928
ILL.mrpD-BSU31630.1~1482	1965.52	-0.610367	0.228466	-2.67158	0.00754949	0.0172227
ILL.mrpE-BSU31640.6~482	607.684	-0.814494	0.245726	-3.31465	0.000917582	0.00256081
ILL.mrpF-BSU31650.1~285	319.243	-0.73411	0.237531	-3.09059	0.00199758	0.00523243
ILL.mrpG-BSU31660.1~375	460.147	-0.653145	0.243896	-2.67797	0.00740706	0.0169257
ILL.mscL-BSU36360.1~393	963.93	0.302645	0.194957	1.55237	0.120574	0.195337
ILL.msmE-BSU30270.1~1281	79.4588	1.06974	0.448226	2.38661	0.0170047	0.0358469
ILL.msmR-BSU30260.14~1048	170.684	0.837471	0.389346	2.15097	0.0314788	0.0617337
ILL.msmX-BSU38810.1~1098	1373.05	-0.0750427	0.232903	-0.322206	0.747297	0.826423
ILL.msrA-BSU21690.20~553	600.346	0.0552957	0.231518	0.238839	0.81123	0.870589
ILL.mstX-BSU31321.47~379	5.09956	1.76863	1.3529	1.30729	0.191114	0.286395
ILL.mta-BSU36600.1~774	144.68	0.733323	0.302655	2.42297	0.0153944	0.0328202
ILL.mtbP-BSU20250.1~1332	1.55658	2.20807	2.91068	0.75861	0.448086	0.567175
ILL.mtlA-BSU03981.1~1437	245.152	-0.827503	0.268491	-3.08205	0.0020558	0.00536116
ILL.mtlD-BSU03990.2~1123	254.986	-0.911281	0.251084	-3.62938	0.0002841	0.000871691
ILL.mtlF-BSU03982.1~432	84.9315	-0.969769	0.359211	-2.69972	0.00693986	0.0159462
ILL.mtlR-BSU04160.186~2270	1689.59	-0.460128	0.211798	-2.17248	0.0298195	0.0590395
ILL.mtn-BSU27270.21~716	2688.24	-0.703964	0.201463	-3.49426	0.00047537	0.00139739
ILL.mtnA-BSU13550.1~1062	1153.24	4.79006	0.264508	18.1094	2.68884e-73	8.55466e-71
ILL.mtnB-BSU13610.1~630	6903.69	5.74576	0.261722	21.9537	7.98519e-107	6.60535e-104
ILL.mtnD-BSU13620.15~551	7722.8	5.72364	0.345066	16.5871	8.64208e-62	1.70208e-59
ILL.mtnK-BSU13560.87~1286	1011.2	4.93529	0.24106	20.4733	3.72614e-93	2.20161e-90
ILL.mtnU-BSU13570.1~780	1514.15	3.76617	0.266531	14.1303	2.47009e-45	1.54792e-43
ILL.mtnW-BSU13590.58~1302	8279.4	5.45964	0.247301	22.0769	5.26814e-108	5.44726e-105
ILL.mtnX-BSU13600.1~708	5826.58	5.55726	0.284668	19.5219	7.14854e-85	3.28515e-82
ILL.mtrB-BSU22770.1~228	3032.42	1.21749	0.198024	6.14823	7.83511e-10	5.18496e-09
ILL.murAA-BSU36760.34~1344	26783.7	-1.74301	0.17673	-9.86255	6.04935e-23	1.01708e-21
ILL.murAB-BSU37100.379~1668	15782.3	0.870307	0.172638	5.04122	4.62564e-07	2.18148e-06
ILL.murB-BSU15230.32~943	5020.05	0.257722	0.223694	1.15212	0.249272	0.35699
ILL.murC-BSU29790.1~1299	12014.3	-0.413719	0.193223	-2.14114	0.0322626	0.063002
ILL.murD-BSU15200.1~1356	7673.08	-0.253186	0.208717	-1.21306	0.225107	0.32899
ILL.murE-BSU15180.1~1485	7298.88	-0.709365	0.175955	-4.03151	5.54185e-05	0.000191648
ILL.murF-BSU04570.72~1445	5577.04	0.728113	0.175834	4.14091	3.45925e-05	0.000123447
ILL.murG-BSU15220.123~1214	4329.37	0.352698	0.205421	1.71695	0.0859876	0.146839
ILL.murQ-BSU01700.29~943	533.849	-0.834709	0.296425	-2.81592	0.00486377	0.0115413
ILL.mutL-BSU17050.1~1884	2683.5	0.198811	0.193997	1.02481	0.305451	0.419754
ILL.mutM-BSU29080.23~853	1487.16	0.131014	0.195913	0.668738	0.503663	0.619801
ILL.mutS-BSU17040.1~2577	3095.03	0.0174544	0.18481	0.094445	0.924756	0.953575
ILL.mutSB-BSU28580.1~2358	6943.56	0.762566	0.184114	4.14181	3.44568e-05	0.000123069
ILL.mutT-BSU04330.1~450	114.703	1.79636	0.386702	4.64533	3.39531e-06	1.4142e-05
ILL.nadA-BSU27850.1~1107	77.946	2.5637	0.429884	5.96369	2.46605e-09	1.5246e-08
ILL.nadB-BSU27870.28~1623	113.744	2.62608	0.355581	7.38532	1.52083e-13	1.36446e-12
ILL.nadC-BSU27860.1~870	36.7569	1.54714	0.531474	2.91104	0.00360231	0.00877969
ILL.nadD-BSU25640.12~581	2622.03	-0.186937	0.231612	-0.807112	0.419602	0.541152
ILL.nadE-BSU03130.75~893	4911.98	-1.00299	0.244295	-4.10566	4.03167e-05	0.000142278
ILL.nadR-BSU27890.1~543	804.613	-0.528145	0.203057	-2.60097	0.00929593	0.0208956
ILL.nagA-BSU35010.14~1204	1297.56	0.0399943	0.199681	0.200291	0.841253	0.892846
ILL.nagBA-BSU35020.1~729	707.146	0.313835	0.209503	1.498	0.134134	0.213705
ILL.nagBB-BSU02360.42~791	1750.53	1.1732	0.200948	5.83829	5.27383e-09	3.16124e-08
ILL.nagP-BSU02350.21~1916	4883.57	1.22424	0.190279	6.43393	1.24345e-10	9.00687e-10
ILL.nagP-BSU07700.15~1373	3094.77	-0.0362934	0.195571	-0.185577	0.852777	0.901376
ILL.nap-BSU05440.12~914	1473.51	-0.849535	0.215622	-3.93992	8.15081e-05	0.000272749
ILL.narG-BSU37280.1~3687	32.5067	-0.142344	0.547364	-0.260053	0.794823	0.859448
ILL.narH-BSU37270.1~1464	14.3603	0.0996936	0.794816	0.12543	0.900183	0.935232
ILL.narI-BSU37250.1~672	15.1849	0.0923565	0.720024	0.128269	0.897936	0.933601
ILL.narJ-BSU37260.1~555	7.10005	0.118268	1.03558	0.114204	0.909076	0.940644
ILL.narK-BSU37320.89~1276	84.1829	0.684202	0.380294	1.79914	0.0719963	0.126016
ILL.nasA-BSU03330.10~1215	184.861	-0.479329	0.273038	-1.75554	0.079167	0.136887
ILL.nasB-BSU03320.23~2338	28.4982	-0.468815	0.554831	-0.844969	0.398128	0.52093
ILL.nasC-BSU03310.4~2136	19.5603	0.845303	0.704171	1.20042	0.229975	0.334898
ILL.nasD-BSU03300.1~2418	88.8037	0.24171	0.340969	0.708891	0.478392	0.597052
ILL.nasE-BSU03290.1~321	338.244	0.279949	0.244196	1.14641	0.251624	0.359861
ILL.nasF-BSU03280.1~1452	1721.95	1.086	0.207684	5.22911	1.70329e-07	8.39665e-07
ILL.natA-BSU02750.12~752	258.54	-1.04298	0.24563	-4.24615	2.17476e-05	8.07434e-05
ILL.natA-BSU09890.11~907	706.569	-1.83278	0.21326	-8.59411	8.3915e-18	1.0031e-16
ILL.natB-BSU02760.1~1161	418.044	-0.883919	0.227836	-3.87964	0.000104612	0.000343666
ILL.natB-BSU09900.1~1260	1551.51	-1.61309	0.220108	-7.32862	2.32534e-13	2.05944e-12
ILL.natK-BSU02730.1~957	463.317	-0.778926	0.228489	-3.40903	0.000651935	0.00186861
ILL.natR-BSU02740.12~713	351.964	-0.622768	0.247575	-2.51547	0.0118874	0.0260552
ILL.ndh-BSU12290.40~1218	30309.7	-0.365309	0.192159	-1.90108	0.057292	0.10448
ILL.ndhF-BSU01830.1~1518	105.15	-0.142537	0.425162	-0.335254	0.737434	0.81814
ILL.ndk-BSU22730.1~450	11119.7	-0.960708	0.189652	-5.06562	4.07063e-07	1.93296e-06
ILL.ndoA-BSU04660.1~351	7599.12	-0.820185	0.178533	-4.59402	4.34782e-06	1.78931e-05
ILL.nfrA-BSU38110.4~753	1172.76	-2.26302	0.21159	-10.6953	1.07027e-26	2.32989e-25
ILL.nhaC-BSU09680.127~1488	1198.48	-2.15541	0.21034	-10.2473	1.21755e-24	2.289e-23
ILL.nhaK-BSU33420.208~2220	1029.52	-0.791966	0.218779	-3.61994	0.000294671	0.000900116
ILL.nhaX-BSU09690.21~521	3.82811	1.14903	1.69164	0.679239	0.496986	0.613959
ILL.nifS-BSU27880.25~1212	230.273	-0.560069	0.260955	-2.14623	0.0318547	0.0622937
ILL.nin-BSU03420.2~400	934.971	-0.352208	0.210277	-1.67497	0.0939402	0.158522
ILL.noc-BSU40990.10~861	4946.36	-0.308653	0.18656	-1.65444	0.0980376	0.164496
ILL.nosA-BSU07630.16~1107	842.088	0.211679	0.222068	0.953213	0.340482	0.458858
ILL.nprB-BSU11100.19~1635	81.8898	-0.655193	0.374262	-1.75063	0.0800103	0.138172
ILL.nprE-BSU14700.13~1578	573.952	-1.36058	0.270425	-5.03128	4.8722e-07	2.28474e-06
ILL.nrdE-BSU17380.1~2103	10159.1	0.342289	0.199001	1.72004	0.085425	0.146241
ILL.nrdEB-BSU20060.1~3507	49.9179	0.00248093	0.448605	0.00553032	0.995587	0.996663
ILL.nrdF-BSU17390.18~1007	6097.49	0.287665	0.227467	1.26464	0.206	0.30615
ILL.nrdF-BSU20040.1~1798	31.2517	-0.780138	0.575413	-1.35579	0.175167	0.266063
ILL.nrdI-BSU17370.9~401	1447.3	0.2202	0.19748	1.11505	0.264829	0.375757
ILL.nrdI-BSU20070.1~390	0.214992	1.05655	4.99658	0.211455	0.832532	NA
ILL.nrdR-BSU29000.162~620	1577.99	0.446968	0.226363	1.97456	0.0483181	0.0899792
ILL.nrnA-BSU29250.1~942	3449.77	0.265131	0.220136	1.2044	0.228436	0.333032
ILL.nsrR-BSU09380.16~456	903.704	-0.0551131	0.22271	-0.247466	0.804548	0.866093
ILL.ntdA-BSU10550.104~1429	41.3884	0.0792053	0.503321	0.157365	0.874957	0.917318
ILL.ntdB-BSU10540.1~849	50.0039	0.130676	0.429421	0.304308	0.760893	0.835427
ILL.ntdC-BSU10530.1~1053	103.653	0.179607	0.321213	0.559151	0.576058	0.685043
ILL.nth-BSU22340.1~660	5447.92	2.37948	0.191216	12.4439	1.50863e-35	5.37903e-34
ILL.nucA-BSU03430.28~471	1375.83	-0.629009	0.202933	-3.09959	0.00193792	0.00508904
ILL.nucB-BSU25750.1~411	22.7189	-0.240072	0.625328	-0.383914	0.701042	0.787697
ILL.nudF-BSU23610.28~585	860.446	0.309227	0.200479	1.54244	0.122967	0.198669
ILL.nupC-BSU39410.75~1256	4036.71	-0.707305	0.223591	-3.16338	0.00155948	0.00415326
ILL.nusA-BSU16600.35~1150	52628.7	-6.88284	0.187132	-36.7807	3.75847e-296	1.5545e-292
ILL.nusB-BSU24320.260~655	4574.83	-0.249321	0.186252	-1.33862	0.180695	0.272856
ILL.nusG-BSU01010.171~704	9284.5	0.420664	0.182781	2.30147	0.0213653	0.0438546
ILL.oatA-BSU27140.86~1990	241.805	-0.0773314	0.25927	-0.298266	0.7655	0.838705
ILL.obgE-BSU27920.34~1320	6552.24	0.471921	0.258649	1.82456	0.0680674	0.120465
ILL.odhB-BSU19360.16~1269	50864.6	0.0273615	0.198846	0.137601	0.890555	0.928938
ILL.ogt-BSU13540.1~498	532.104	0.387897	0.253485	1.53026	0.125953	0.20286
ILL.ohrA-BSU13140.6~431	443.595	0.757655	0.250064	3.02984	0.00244684	0.00623544
ILL.ohrB-BSU13160.59~469	44.3113	1.42145	0.505172	2.8138	0.00489595	0.0115977
ILL.ohrR-BSU13150.16~459	288.428	-0.746268	0.238065	-3.13473	0.00172015	0.00455477
ILL.oppA-BSU11430.137~1774	8640.23	1.0816	0.226937	4.76609	1.87839e-06	8.12659e-06
ILL.oppB-BSU11440.108~1043	953.187	1.00242	0.294407	3.40487	0.00066196	0.00189603
ILL.oppC-BSU11450.1~918	1052.4	0.967216	0.293988	3.28998	0.00100195	0.00276825
ILL.oppD-BSU11460.5~1081	1526.67	1.06874	0.297505	3.59233	0.000327739	0.000990159
ILL.oppF-BSU11470.2~919	1618.72	1.12979	0.258268	4.37449	1.21719e-05	4.68741e-05
ILL.opuAA-BSU02980.22~1278	4715.39	0.792511	0.293578	2.69949	0.00694449	0.015948
ILL.opuAB-BSU02990.2~850	3402.46	0.957375	0.233226	4.10493	4.04446e-05	0.000142608
ILL.opuAC-BSU03000.1~882	5285.77	1.04696	0.23444	4.4658	7.977e-06	3.15118e-05
ILL.opuBA-BSU33730.53~1198	187.406	1.10342	0.316515	3.48613	0.000490055	0.00143749
ILL.opuBB-BSU33720.10~663	89.1875	1.13755	0.384088	2.96169	0.0030596	0.00759371
ILL.opuBC-BSU33710.1~921	164.969	1.03237	0.320479	3.22133	0.00127598	0.00344708
ILL.opuBD-BSU33700.11~691	139.113	0.769962	0.328447	2.34425	0.0190653	0.0397449
ILL.opuCA-BSU33830.29~1171	1926.35	2.33788	0.20804	11.2376	2.66402e-29	6.67782e-28
ILL.opuCB-BSU33820.23~676	1024.38	2.73018	0.263188	10.3735	3.27349e-25	6.35641e-24
ILL.opuCC-BSU33810.1~912	1509.07	2.65265	0.224632	11.8089	3.51226e-32	1.04509e-30
ILL.opuCD-BSU33800.18~707	1414.25	2.67911	0.241589	11.0895	1.4104e-28	3.37192e-27
ILL.opuD-BSU30070.1~1539	2077.25	-0.245842	0.182985	-1.34351	0.179108	0.271054
ILL.opuE-BSU06660.109~1587	676.7	1.33885	0.302519	4.42566	9.61488e-06	3.75162e-05
ILL.oxdC-BSU33240.13~1170	72.2841	-0.0108914	0.405361	-0.0268684	0.978565	0.987885
ILL.pabA-BSU00750.14~598	1212.3	0.311094	0.195427	1.59187	0.111414	0.183006
ILL.pabB-BSU00740.79~1491	1650.12	0.419164	0.212233	1.97501	0.0482665	0.089928
ILL.pabC-BSU00760.1~882	1525.12	0.762251	0.198254	3.84482	0.000120643	0.000388917
ILL.padC-BSU34400.23~508	70.1057	-0.140542	0.385775	-0.36431	0.715627	0.799091
ILL.padR-BSU08340.61~609	988.617	-0.0851927	0.220754	-0.385916	0.699559	0.787099
ILL.paiA-BSU32150.128~646	117.46	-0.0250952	0.343408	-0.0730769	0.941745	0.967198
ILL.paiB-BSU32140.1~624	221.783	-0.408592	0.254607	-1.6048	0.108539	0.178851
ILL.panB-BSU22430.120~953	7276.76	0.196304	0.188398	1.04196	0.297429	0.411978
ILL.panC-BSU22420.1~861	6858.88	0.231976	0.187171	1.23938	0.215205	0.317435
ILL.panD-BSU22410.2~385	2523.43	0.299371	0.190892	1.56827	0.116817	0.190069
ILL.parA-BSU40970.30~791	2646.27	-0.433422	0.19451	-2.22828	0.0258618	0.0520001
ILL.parB-BSU40960.1~849	3223.73	-0.643184	0.17876	-3.59802	0.000320644	0.000970853
ILL.parC-BSU18100.4~2424	7916.36	0.622453	0.181095	3.43717	0.000587831	0.00170257
ILL.parE-BSU18090.264~2231	5127.34	0.382545	0.190135	2.01196	0.0442237	0.083368
ILL.patA-BSU14000.1~1182	8017.08	0.772949	0.180634	4.27909	1.87662e-05	7.0497e-05
ILL.patB-BSU31440.57~1220	1644.4	-1.68462	0.240233	-7.01242	2.34225e-12	1.94921e-11
ILL.pbpA-BSU25000.40~2190	8846.75	-0.335062	0.180687	-1.85438	0.0636841	0.113727
ILL.pbpB-BSU15160.1~2151	13820.2	1.22689	0.185135	6.62701	3.42565e-11	2.59496e-10
ILL.pbpC-BSU04140.151~2157	10235.5	-0.839404	0.19464	-4.3126	1.61344e-05	6.13345e-05
ILL.pbpD-BSU31490.1~1875	5460.76	-0.0724598	0.178551	-0.405821	0.684874	0.775428
ILL.pbpE-BSU34440.6~1361	1135.01	0.15722	0.201388	0.780682	0.434989	0.555774
ILL.pbpF-BSU10110.1~2145	775.511	-0.584283	0.212128	-2.75438	0.00588027	0.013648
ILL.pbpG-BSU37510.1~2076	30.2582	-0.74285	0.529046	-1.40413	0.160279	0.248266
ILL.pbpH-BSU13980.87~2144	2649.72	-0.143156	0.201745	-0.709591	0.477958	0.596836
ILL.pbpI-BSU27310.40~1794	502.136	0.497428	0.236565	2.10271	0.0354908	0.0683818
ILL.pbpX-BSU16950.28~1203	3609.31	-0.374262	0.186383	-2.00803	0.0446403	0.0840383
ILL.pbuE-BSU05800.1~1167	1935.88	-2.94692	0.210642	-13.9902	1.79031e-44	1.02844e-42
ILL.pbuG-BSU06370.135~1457	4967.48	-1.28884	0.28268	-4.55934	5.13136e-06	2.0833e-05
ILL.pbuO-BSU29990.88~1386	1920.4	-2.30628	0.198259	-11.6327	2.81212e-31	7.85873e-30
ILL.pbuX-BSU22060.1~1317	527.875	-3.14019	0.227809	-13.7843	3.16628e-43	1.7461e-41
ILL.pckA-BSU30560.27~1610	2216.36	-0.755243	0.214361	-3.52324	0.000426312	0.00126306
ILL.pcp-BSU02650.1~648	188.59	-0.304921	0.287981	-1.05883	0.289679	0.403813
ILL.pcrA-BSU06610.1~2220	3339.4	-0.369881	0.186638	-1.98181	0.047501	0.088617
ILL.pcrB-BSU06600.23~709	787.125	-0.339129	0.217893	-1.55641	0.119612	0.19393
ILL.pdaA-BSU07980.31~822	294.963	0.552347	0.249403	2.21468	0.0267821	0.0536681
ILL.pdeH-BSU31740.26~1255	2457.59	-0.111308	0.196377	-0.566807	0.570846	0.680972
ILL.pdhA-BSU14580.208~1323	58096.5	-1.00414	0.175667	-5.71613	1.08977e-08	6.2951e-08
ILL.pdhB-BSU14590.1~978	37686.4	-0.729863	0.176491	-4.13541	3.54314e-05	0.000126005
ILL.pdhC-BSU14600.1~1329	65871	-0.414772	0.171236	-2.42222	0.0154259	0.0328705
ILL.pdhD-BSU14610.1~1413	63445.7	-0.389693	0.182781	-2.13203	0.0330046	0.0642387
ILL.pdp-BSU39400.30~1331	5572.72	-0.644249	0.195923	-3.28827	0.00100805	0.00278139
ILL.pel-BSU07560.41~1303	3783.79	-3.85414	0.22354	-17.2414	1.29908e-66	3.16059e-64
ILL.pelB-BSU18650.1~1038	32.3263	0.573207	0.531985	1.07749	0.281263	0.395278
ILL.pelC-BSU34950.141~806	308.197	0.204502	0.233011	0.877648	0.380135	0.501351
ILL.penP-BSU18800.1~921	2434.94	0.0316846	0.231214	0.137036	0.891002	0.92896
ILL.pepF-BSU11540.1~2013	3439.39	-0.936949	0.195198	-4.8	1.58663e-06	6.92957e-06
ILL.pepT-BSU38920.1~1233	2148.72	-1.35316	0.232312	-5.82478	5.71884e-09	3.40823e-08
ILL.perR-BSU08730.1~438	4040.79	-0.205613	0.193933	-1.06023	0.289041	0.403195
ILL.pfkA-BSU29190.184~1143	13920	-1.20178	0.173273	-6.93578	4.03985e-12	3.32845e-11
ILL.pgcA-BSU09310.1~1746	7396.76	-0.638476	0.194722	-3.27892	0.00104205	0.00286564
ILL.pgcM-BSU34550.1~681	117.993	0.036453	0.375243	0.0971451	0.922611	0.951895
ILL.pgdS-BSU35860.14~1255	11732	1.9992	0.203139	9.84152	7.45776e-23	1.24771e-21
ILL.pgi-BSU31350.11~1363	21166.8	-1.12211	0.261626	-4.28897	1.79507e-05	6.76177e-05
ILL.pgk-BSU33930.317~1501	31482.2	-0.934769	0.228583	-4.08941	4.32472e-05	0.000151457
ILL.pgm-BSU33910.1~1536	30669.1	-0.943628	0.227283	-4.15177	3.29919e-05	0.00011824
ILL.pgsA-BSU16920.50~631	2777.76	1.23854	0.179539	6.89846	5.25697e-12	4.28009e-11
ILL.pgsA-BSU35880.19~1161	127.579	-0.112563	0.308774	-0.364548	0.715449	0.799091
ILL.pgsB-BSU35900.74~1255	86.8469	-0.342593	0.36208	-0.946183	0.344055	0.462769
ILL.pgsC-BSU35890.15~464	26.1862	0.19245	0.581125	0.331168	0.740518	0.820681
ILL.pgsE-BSU35870.1~168	21.9616	0.0190139	0.809679	0.0234832	0.981265	0.989157
ILL.pheA-BSU27900.1~858	2285.81	1.02596	0.215157	4.76843	1.85671e-06	8.04966e-06
ILL.pheB-BSU27910.51~494	1541.19	1.03668	0.236512	4.3832	1.1695e-05	4.52484e-05
ILL.pheS-BSU28640.298~1332	3648.56	-1.21111	0.189488	-6.39148	1.64287e-10	1.18173e-09
ILL.pheT-BSU28630.1~2415	5153.05	-2.01439	0.177943	-11.3204	1.03988e-29	2.67138e-28
ILL.phoA-BSU09410.106~1491	408.247	1.16041	0.234339	4.95184	7.35155e-07	3.36349e-06
ILL.phoB-BSU05740.264~1652	115.031	-0.672064	0.317423	-2.11725	0.0342387	0.0663285
ILL.phoD-BSU02620.19~1770	53.9482	1.18151	0.435828	2.71095	0.00670909	0.0154589
ILL.phoE-BSU10340.11~592	726.289	-0.584259	0.211873	-2.75759	0.00582288	0.0135376
ILL.phoH-BSU25340.1~960	6457.63	-0.75013	0.193592	-3.8748	0.000106712	0.000348625
ILL.phoP-BSU29110.57~779	1103.43	0.36022	0.230471	1.56298	0.118058	0.191786
ILL.phoR-BSU29100.1~1740	3291.23	0.28632	0.183719	1.55847	0.119122	0.193287
ILL.phrA-BSU12440.1~135	31.8751	0.611029	0.62703	0.974481	0.329818	0.447401
ILL.phrC-BSU03780.1~123	68.3514	-0.331798	0.616547	-0.538154	0.590471	0.696772
ILL.phrE-BSU25840.1~135	42.4114	-0.0952285	0.473748	-0.201011	0.84069	0.892707
ILL.phrF-BSU37470.1~120	167.145	0.0134514	0.408214	0.0329518	0.973713	0.985518
ILL.phrG-BSU40310.1~117	0.301286	-1.88723	4.98699	-0.37843	0.705111	NA
ILL.phrH-BSU06839.1~174	64.8524	0.524488	0.490539	1.06921	0.284976	0.398736
ILL.phrI-BSU05020.1~120	21.6022	0.553201	0.620345	0.891763	0.37252	0.494303
ILL.phrK-BSU18920.1~123	22.1382	1.24405	0.781912	1.59104	0.111601	0.183168
ILL.phy-BSU19800.6~1154	20.5388	-0.0103841	0.656652	-0.0158137	0.987383	0.992422
ILL.pit-BSU12840.1~1002	11853.2	-0.776687	0.172937	-4.49115	7.08387e-06	2.82535e-05
ILL.pksA-BSU17080.1~618	506.242	0.40116	0.214387	1.8712	0.0613181	0.11041
ILL.pksB-BSU17090.54~731	179.424	1.27823	0.311974	4.09722	4.18133e-05	0.000146933
ILL.pksC-BSU17100.282~1148	518.407	1.07173	0.252181	4.24985	2.13914e-05	7.96354e-05
ILL.pksD-BSU17110.504~1478	197.204	1.07664	0.276008	3.90074	9.58976e-05	0.000316799
ILL.pksE-BSU17120.1~2304	129.437	1.3021	0.388658	3.35025	0.000807389	0.00228098
ILL.pksF-BSU17140.1~1248	21.974	2.56881	0.77063	3.33339	0.000857946	0.00241064
ILL.pksG-BSU17150.1~1263	22.6589	3.16769	0.909211	3.484	0.00049398	0.00144785
ILL.pksH-BSU17160.1~780	15.6669	1.98551	0.933608	2.1267	0.0334448	0.0649731
ILL.pksI-BSU17170.1~750	11.4583	1.82704	0.933143	1.95794	0.0502371	0.0928422
ILL.pksJ-BSU17180.1~15132	453.572	1.57051	0.288722	5.43952	5.34251e-08	2.81845e-07
ILL.pksL-BSU17190.1~13617	789.223	1.38038	0.227051	6.0796	1.20482e-09	7.76192e-09
ILL.pksM-BSU17200.1~12789	859.417	0.935278	0.228566	4.09194	4.27774e-05	0.000150065
ILL.pksN-BSU17210.14~16480	1341.35	1.95676	0.216816	9.02496	1.79763e-19	2.46192e-18
ILL.pksR-BSU17220.15~7646	1054.43	1.55275	0.194011	8.0034	1.21032e-15	1.24524e-14
ILL.pksS-BSU17230.82~1299	1760.53	-0.401712	0.246113	-1.63222	0.102633	0.171096
ILL.plsC-BSU09540.25~624	2862.57	-1.00102	0.320886	-3.11955	0.00181125	0.00477627
ILL.plsX-BSU15890.1~1002	6546.61	-0.0313041	0.333885	-0.0937569	0.925302	0.953826
ILL.pnbA-BSU34390.13~1482	424.902	-0.88304	0.22503	-3.9241	8.70535e-05	0.000290366
ILL.pncA-BSU31760.1~552	2551.98	0.596843	0.206352	2.89236	0.00382362	0.00926993
ILL.pnpA-BSU16690.173~2290	46309.4	0.589444	0.194992	3.02292	0.00250352	0.00636014
ILL.polA-BSU29090.47~2689	3629.71	0.00762595	0.178136	0.0428096	0.965853	0.982039
ILL.polC-BSU16580.109~4422	39866.8	2.6062	0.173903	14.9865	8.99147e-51	7.74765e-49
ILL.ponA-BSU22320.1~2745	11994.5	-0.28845	0.197428	-1.46104	0.144005	0.226466
ILL.ppaC-BSU40550.26~955	17739.2	-0.208338	0.187218	-1.11281	0.265792	0.376994
ILL.ppiB-BSU23360.39~470	5177.36	-0.865306	0.223108	-3.87842	0.000105139	0.000344576
ILL.ppnK-BSU11610.1~801	1691.01	-1.00611	0.249098	-4.03899	5.36808e-05	0.000186005
ILL.ppnK-BSU29540.58~861	2527.54	0.178554	0.268375	0.665315	0.505849	0.621013
ILL.pps-BSU18830.27~2627	922.283	-1.28446	0.201688	-6.36854	1.9083e-10	1.35848e-09
ILL.ppsA-BSU18340.84~7769	553.476	0.726599	0.263027	2.76245	0.00573699	0.0133529
ILL.ppsB-BSU18330.1~7683	475.742	0.853668	0.269218	3.17092	0.00151955	0.00405475
ILL.ppsC-BSU18320.17~7684	574.552	0.788587	0.22582	3.49211	0.000479218	0.0014077
ILL.ppsD-BSU18310.1~10812	1003.82	0.879028	0.19776	4.44493	8.79219e-06	3.45014e-05
ILL.ppsE-BSU18300.1~3840	387.219	0.849988	0.241841	3.51465	0.000440333	0.00130087
ILL.prfA-BSU37010.25~1095	8944.27	-1.16356	0.185794	-6.26262	3.78562e-10	2.60956e-09
ILL.prfB-BSU35290.10~1111	9833.52	-0.0536702	0.195258	-0.274868	0.783417	0.851344
ILL.priA-BSU15710.1~2418	6553.37	2.39739	0.180935	13.25	4.5104e-40	2.05e-38
ILL.prkA-BSU08970.1~1896	51.1701	-0.387448	0.428688	-0.9038	0.366101	0.487036
ILL.prkC-BSU15770.1~1947	7559.9	0.669543	0.214466	3.12191	0.00179683	0.00474261
ILL.prmA-BSU25450.1~936	4041.31	-0.612786	0.226758	-2.70237	0.00688461	0.0158457
ILL.prmC-BSU37000.1~867	2213.86	0.942506	0.200639	4.69753	2.63321e-06	1.11473e-05
ILL.proA-BSU13130.12~1259	2469	-3.14275	0.235032	-13.3716	8.86393e-41	4.52607e-39
ILL.proB-BSU13120.53~1150	1249.26	-3.05049	0.228513	-13.3493	1.19587e-40	5.75131e-39
ILL.proG-BSU12910.10~828	397.993	-0.0469648	0.243656	-0.19275	0.847155	0.897498
ILL.proH-BSU18480.1~894	503.553	-1.52128	0.296717	-5.12704	2.94329e-07	1.41882e-06
ILL.proI-BSU23800.267~1103	3309.62	2.83715	0.198768	14.2737	3.19188e-46	2.1642e-44
ILL.proJ-BSU18470.1~1116	696.096	-1.54694	0.243283	-6.3586	2.03606e-10	1.44693e-09
ILL.proS-BSU16570.33~1727	19305.7	0.66261	0.186309	3.5565	0.000375828	0.00112395
ILL.prpB-BSU24120.18~923	192.553	0.452899	0.270267	1.67575	0.0937881	0.15833
ILL.prpC-BSU15760.1~765	2900.81	0.900055	0.212725	4.23108	2.32569e-05	8.57312e-05
ILL.prpD-BSU24130.15~1433	82.635	1.10178	0.357902	3.07843	0.00208095	0.0054131
ILL.prs-BSU00510.1~954	9512.32	-1.18172	0.173134	-6.82548	8.76305e-12	6.96999e-11
ILL.prsA-BSU09950.3~881	13845.6	-0.60096	0.175658	-3.4212	0.000623463	0.00179696
ILL.prsW-BSU22940.1~657	1162.06	0.20219	0.246747	0.819421	0.412546	0.533884
ILL.psd-BSU02290.1~792	2135.43	-0.56977	0.186988	-3.04709	0.0023107	0.00594056
ILL.pspA-BSU06180.31~714	1114.4	-0.142676	0.210935	-0.676396	0.498789	0.615723
ILL.pssA-BSU02270.1~534	1224.2	-0.782163	0.224512	-3.48383	0.000494285	0.00144785
ILL.pstA-BSU24970.1~885	27.0367	1.72206	0.625895	2.75135	0.00593499	0.0137596
ILL.pstBA-BSU24960.1~810	32.6804	2.07085	0.580164	3.56942	0.000357776	0.00107385
ILL.pstBB-BSU24950.11~793	43.5816	1.90779	0.523834	3.64198	0.000270544	0.000833808
ILL.pstC-BSU24980.1~930	25.1311	2.41425	0.668781	3.60993	0.000306281	0.000931455
ILL.pstS-BSU24990.106~1008	42.717	2.01199	0.510624	3.94026	8.13925e-05	0.000272582
ILL.ptb-BSU24090.10~909	1052.56	-0.756306	0.220596	-3.42846	0.000607009	0.00175198
ILL.pth-BSU00530.107~673	1882.51	0.100733	0.188669	0.533912	0.593402	0.699433
ILL.ptkA-BSU36250.1~714	620.17	-1.52705	0.231296	-6.60215	4.05232e-11	3.04181e-10
ILL.ptsG-BSU13890.229~2328	86756.6	-1.55887	0.330499	-4.71672	2.39673e-06	1.01984e-05
ILL.ptsH-BSU13900.6~272	11345.2	-1.45253	0.253083	-5.73936	9.50353e-09	5.52059e-08
ILL.ptsI-BSU13910.1~1713	101311	-1.45737	0.220338	-6.61425	3.73434e-11	2.81848e-10
ILL.pucA-BSU32510.57~1049	9.10265	2.14228	1.07725	1.98866	0.0467392	0.0875911
ILL.pucB-BSU32500.1~618	4.09711	1.95456	1.47091	1.32881	0.183909	0.2767
ILL.pucC-BSU32490.1~834	7.52688	2.09521	1.12089	1.86923	0.0615907	0.110758
ILL.pucD-BSU32480.1~2238	59.6035	0.756693	0.406217	1.86278	0.0624936	0.112039
ILL.pucE-BSU32470.1~522	15.8237	0.947968	0.762534	1.24318	0.213801	0.315815
ILL.pucG-BSU32520.16~1266	199.264	1.1392	0.327578	3.47764	0.000505851	0.00147963
ILL.pucH-BSU32410.1~1341	120.919	-0.442469	0.358566	-1.234	0.217203	0.319603
ILL.pucI-BSU36470.181~1653	48.3247	0.448793	0.437951	1.02476	0.305479	0.419754
ILL.pucJ-BSU32430.96~1445	67.8805	-0.388396	0.377043	-1.03011	0.302958	0.417539
ILL.pucK-BSU32440.6~1298	37.0823	-0.694131	0.491706	-1.41168	0.158045	0.245649
ILL.pucL-BSU32450.13~1497	76.4356	-0.745633	0.393741	-1.89371	0.058263	0.10597
ILL.pucM-BSU32460.1~345	34.9386	-0.668836	0.497136	-1.34538	0.178503	0.270268
ILL.pucR-BSU32420.68~1663	234.994	-0.00839825	0.272984	-0.0307647	0.975457	0.986165
ILL.pupG-BSU23490.1~816	9545.27	-0.642881	0.179699	-3.57754	0.000346842	0.0010433
ILL.purA-BSU40420.45~1337	12531.5	-2.00487	0.203722	-9.8412	7.48146e-23	1.24771e-21
ILL.purB-BSU06440.1~1296	1869.73	-1.07053	0.194896	-5.49283	3.95548e-08	2.13297e-07
ILL.purC-BSU06450.51~776	469.577	0.464968	0.247104	1.88167	0.0598807	0.108246
ILL.purD-BSU06530.11~1279	1269.53	0.66568	0.211698	3.14447	0.00166386	0.00441418
ILL.purE-BSU06420.141~629	458.211	-1.18018	0.279409	-4.22384	2.4017e-05	8.81406e-05
ILL.purF-BSU06490.1~1431	1143.65	0.677912	0.229922	2.94845	0.00319377	0.00788622
ILL.purH-BSU06520.1~1539	1310.6	0.808078	0.210205	3.84423	0.000120932	0.000389544
ILL.purK-BSU06430.1~1143	1293.98	-1.18949	0.211338	-5.62837	1.81925e-08	1.02792e-07
ILL.purL-BSU06480.1~2229	1424.09	0.533442	0.236745	2.25323	0.0242445	0.0490824
ILL.purM-BSU06500.102~1142	710.245	0.895717	0.221466	4.0445	5.24357e-05	0.000182247
ILL.purN-BSU06510.1~588	389.508	0.89007	0.24057	3.69983	0.00021574	0.000671913
ILL.purQ-BSU06470.1~684	429.871	0.513299	0.235094	2.18338	0.0290081	0.0575985
ILL.purR-BSU00470.1~858	3874.2	-0.572558	0.193328	-2.96158	0.00306062	0.00759371
ILL.purS-BSU06460.1~255	115.108	0.62889	0.316282	1.98838	0.0467693	0.0876078
ILL.purT-BSU02230.15~1169	2685.66	0.396653	0.288894	1.37301	0.169749	0.259839
ILL.purU-BSU13110.1~903	6194.89	0.547146	0.191207	2.86154	0.00421589	0.010126
ILL.pycA-BSU14860.1~3447	75858.4	1.90758	0.180834	10.5488	5.14452e-26	1.06389e-24
ILL.pyk-BSU29180.23~1780	31687.4	-0.905793	0.172435	-5.25294	1.49689e-07	7.45022e-07
ILL.pyrAA-BSU15510.1~1095	2473.92	-1.51586	0.195321	-7.76084	8.4368e-15	8.24931e-14
ILL.pyrB-BSU15490.31~945	1550.47	-2.09499	0.206989	-10.1213	4.44666e-24	7.99626e-23
ILL.pyrC-BSU15500.1~1287	2510.64	-1.67603	0.199891	-8.3847	5.08558e-17	5.74698e-16
ILL.pyrD-BSU15540.1~936	2201.89	-1.43252	0.268311	-5.33903	9.34456e-08	4.77739e-07
ILL.pyrE-BSU15560.1~651	1985.41	-1.60323	0.307856	-5.20772	1.91177e-07	9.39084e-07
ILL.pyrF-BSU15550.1~720	1623.1	-1.47372	0.270004	-5.45815	4.81131e-08	2.55123e-07
ILL.pyrG-BSU37150.131~1738	17729.9	-2.02651	0.181596	-11.1594	6.43934e-29	1.56665e-27
ILL.pyrH-BSU16510.146~868	17450.7	-0.521148	0.173121	-3.01031	0.00260978	0.00658575
ILL.pyrK-BSU15530.1~771	2123.22	-1.29581	0.257996	-5.0226	5.09759e-07	2.37964e-06
ILL.pyrP-BSU15480.53~1360	9671.31	-2.17194	0.208088	-10.4376	1.66945e-25	3.28802e-24
ILL.pyrR-BSU15470.27~572	7499.21	-1.75631	0.210161	-8.35698	6.43431e-17	7.2316e-16
ILL.qcrA-BSU22560.1~504	1201.8	2.02503	0.195747	10.3451	4.40282e-25	8.4698e-24
ILL.qcrB-BSU22550.2~676	2355.44	2.01042	0.194387	10.3424	4.53246e-25	8.67882e-24
ILL.qcrC-BSU22540.1~768	2717.23	2.06128	0.212243	9.71188	2.68344e-22	4.25238e-21
ILL.qodI-BSU39980.2~1015	79.7706	1.50835	0.375077	4.02143	5.78468e-05	0.000199213
ILL.qoxA-BSU38170.258~1223	23927.6	-0.898047	0.195733	-4.58811	4.47272e-06	1.83888e-05
ILL.qoxB-BSU38160.28~1977	49611.5	-0.682069	0.201695	-3.38168	0.000720435	0.00204933
ILL.qoxC-BSU38150.14~628	14699.5	-0.731963	0.192818	-3.79614	0.000146969	0.000469031
ILL.qoxD-BSU38140.2~376	9045.75	-0.716855	0.210686	-3.40247	0.00066779	0.00190876
ILL.queA-BSU27720.1~1029	3325.4	-0.504028	0.177687	-2.8366	0.00455965	0.0108758
ILL.queC-BSU13720.130~789	939.058	-0.43953	0.258997	-1.69705	0.0896872	0.152339
ILL.queD-BSU13730.1~450	591.332	-0.393137	0.273875	-1.43546	0.151156	0.236091
ILL.queE-BSU13740.1~732	1405.37	-0.283654	0.257493	-1.1016	0.270635	0.382806
ILL.racA-BSU37030.1~555	293.371	-1.2629	0.255432	-4.94417	7.64704e-07	3.48712e-06
ILL.racE-BSU28390.1~819	4286.07	0.120152	0.188942	0.635922	0.524827	0.638437
ILL.racX-BSU34430.16~699	668.139	0.227747	0.216455	1.05217	0.292723	0.407506
ILL.radA-BSU00870.88~1464	1817.43	1.12224	0.186833	6.00665	1.89394e-09	1.18329e-08
ILL.radC-BSU28040.1~696	1101.63	-1.20888	0.194925	-6.20177	5.58307e-10	3.75473e-09
ILL.rapA-BSU12430.21~1157	847.689	-0.0166446	0.201339	-0.0826696	0.934114	0.961308
ILL.rapB-BSU36690.20~1153	3064.16	0.459617	0.185306	2.48032	0.0131266	0.028425
ILL.rapC-BSU03770.1~1149	2433.73	-0.885317	0.209421	-4.22745	2.36351e-05	8.69703e-05
ILL.rapD-BSU36380.17~1081	885.772	-0.833614	0.250805	-3.32375	0.000888149	0.00248369
ILL.rapE-BSU25830.1~1128	29.7843	-0.0246619	0.581239	-0.0424298	0.966156	0.982039
ILL.rapF-BSU37460.1~1146	2296.1	0.751826	0.188271	3.99331	6.51577e-05	0.000222721
ILL.rapG-BSU40300.1~1098	1217.04	0.154017	0.200939	0.766487	0.443387	0.564209
ILL.rapH-BSU06830.1~1131	492.452	-0.0414099	0.224577	-0.184391	0.853707	0.901703
ILL.rapI-BSU05010.50~1225	209.375	0.283037	0.455509	0.621365	0.53436	0.646043
ILL.rapJ-BSU02820.6~1127	1874.41	-0.31676	0.191652	-1.65279	0.098373	0.164992
ILL.rapK-BSU18910.10~1125	395.265	0.571619	0.274536	2.08213	0.0373307	0.0716804
ILL.rbfA-BSU16650.17~370	8730.79	1.83154	0.176589	10.3717	3.33455e-25	6.44471e-24
ILL.rbfK-BSU29300.1~693	7.03381	1.73337	1.32436	1.30883	0.190591	0.285921
ILL.rbgA-BSU16050.44~892	4735.22	0.563506	0.190551	2.95725	0.00310394	0.00768737
ILL.rbsA-BSU35940.1~1482	3408.37	-2.37452	0.432192	-5.49414	3.92629e-08	2.11999e-07
ILL.rbsB-BSU35960.12~929	3789.23	-2.71578	0.410496	-6.61584	3.69442e-11	2.79344e-10
ILL.rbsC-BSU35950.1~969	2523.78	-2.45217	0.421131	-5.82283	5.78579e-09	3.43822e-08
ILL.rbsD-BSU35930.1~396	691.308	-1.93521	0.436607	-4.43237	9.32016e-06	3.64694e-05
ILL.rbsK-BSU35920.1~882	3003.07	-1.82911	0.346205	-5.28332	1.26861e-07	6.38318e-07
ILL.rbsR-BSU35910.12~992	3231.06	-1.86664	0.323817	-5.76449	8.19065e-09	4.78482e-08
ILL.recA-BSU16940.1~1047	15969	0.331039	0.187911	1.76168	0.0781228	0.135308
ILL.recF-BSU00040.1~1113	9178.64	0.220737	0.195139	1.13118	0.257979	0.367551
ILL.recG-BSU15870.1~2049	4101.11	1.81962	0.191329	9.51041	1.8992e-21	2.90929e-20
ILL.recJ-BSU27620.19~2379	8445.51	-1.0033	0.182007	-5.51242	3.53923e-08	1.92103e-07
ILL.recN-BSU24240.1~1731	8969.64	1.74291	0.198398	8.78493	1.56463e-18	1.97899e-17
ILL.recO-BSU25280.1~768	5010.73	1.11289	0.192078	5.79394	6.87535e-09	4.04501e-08
ILL.recQ-BSU23020.1~1491	2360.39	1.19181	0.195933	6.08277	1.18127e-09	7.64592e-09
ILL.recR-BSU00210.1~597	2027.6	0.354633	0.18957	1.87072	0.0613843	0.110481
ILL.recU-BSU22310.7~627	1302.28	-0.535107	0.223344	-2.39589	0.0165801	0.035023
ILL.recX-BSU08520.89~883	1098.63	-0.556057	0.199086	-2.79305	0.0052214	0.0122425
ILL.relA-BSU27600.1~2205	15239	0.974199	0.175202	5.56044	2.69095e-08	1.49192e-07
ILL.resA-BSU23150.1~540	1126.39	-0.989513	0.243482	-4.06402	4.82351e-05	0.000168213
ILL.resB-BSU23140.1~1629	3410.05	-0.746498	0.201924	-3.69692	0.000218234	0.000678521
ILL.resC-BSU23130.20~1195	2268.8	-0.499059	0.198297	-2.51673	0.011845	0.0259761
ILL.resD-BSU23120.1~723	1808.6	-0.261947	0.186459	-1.40485	0.160066	0.248045
ILL.resE-BSU23110.1~1770	4881.72	-0.395237	0.200121	-1.97499	0.0482689	0.089928
ILL.rex-BSU12280.252~674	10766.9	-0.49021	0.185434	-2.64358	0.00820342	0.0186425
ILL.rghRA-BSU33660.18~425	427.772	0.579702	0.238262	2.43304	0.0149726	0.0319869
ILL.rghRB-BSU33670.1~420	302.145	0.640298	0.237325	2.69798	0.00697611	0.0160118
ILL.rhgT-BSU07020.1~699	16.9549	0.221046	0.704606	0.313716	0.753737	0.830657
ILL.rho-BSU37080.407~1690	8018.99	0.111265	0.240981	0.461716	0.644285	0.742894
ILL.ribA-BSU23260.1~1197	1381.85	-0.135977	0.21553	-0.630897	0.528108	0.640738
ILL.ribC-BSU16670.19~969	2726.63	0.386679	0.196141	1.97143	0.0486745	0.0904798
ILL.ribD-BSU23280.130~1215	1475.65	-0.159884	0.194839	-0.820596	0.411876	0.533183
ILL.ribE-BSU23270.11~658	539.523	-0.428607	0.22517	-1.90348	0.0569778	0.103998
ILL.ribH-BSU23250.33~497	860.023	-0.219884	0.219296	-1.00268	0.316015	0.430655
ILL.rimI-BSU05930.6~461	2103.31	2.63408	0.187598	14.0411	8.73126e-45	5.23369e-43
ILL.rimM-BSU16020.5~529	3884.42	0.738669	0.191755	3.85215	0.000117084	0.000379452
ILL.rimO-BSU25430.1~1356	7816	-0.647028	0.22318	-2.89912	0.00374206	0.00908284
ILL.rlmB-BSU00960.1~750	1782.2	0.520667	0.184546	2.82134	0.0047824	0.0113613
ILL.rluB-BSU23160.11~745	1671.52	-0.16478	0.199668	-0.825273	0.409217	0.53107
ILL.rluD-BSU15460.1~912	4786.59	-0.740186	0.206729	-3.58047	0.000342975	0.00103242
ILL.rnc-BSU15930.140~889	5900.87	-0.470874	0.202864	-2.32114	0.0202795	0.041938
ILL.rnhB-BSU16060.7~774	2701.59	2.69469	0.220739	12.2076	2.83232e-34	9.37157e-33
ILL.rnhC-BSU28620.31~972	1129.01	-0.317934	0.209904	-1.51466	0.129858	0.208176
ILL.rnjA-BSU14530.1~1668	20876.7	0.183604	0.174757	1.05063	0.293431	0.40808
ILL.rnjB-BSU16780.1~1668	21198.7	1.25907	0.177421	7.0965	1.27959e-12	1.08451e-11
ILL.rnmV-BSU00410.69~629	1761.46	-0.014137	0.19002	-0.0743973	0.940694	0.966636
ILL.rnpA-BSU41050.152~502	3860.75	-3.49242	0.187858	-18.5907	3.82002e-77	1.43633e-74
ILL.rnpB-BSU-misc-RNA-35.1~386	123054	-1.98376	0.256645	-7.72959	1.07894e-14	1.03779e-13
ILL.rnr-BSU33610.19~2358	5739.05	0.982151	0.218998	4.48474	7.30027e-06	2.90326e-05
ILL.rocA-BSU37780.10~1557	466.746	-1.31412	0.295171	-4.45208	8.50421e-06	3.34666e-05
ILL.rocB-BSU37770.68~1768	60.1511	0.622317	0.458263	1.35799	0.174467	0.265293
ILL.rocC-BSU37760.1~1413	86.2568	0.334498	0.358755	0.932387	0.351136	0.47122
ILL.rocD-BSU40340.32~1237	750.524	2.36376	0.230185	10.2689	9.72706e-25	1.83704e-23
ILL.rocE-BSU40330.223~1626	1467.07	0.0484455	0.195961	0.247221	0.804737	0.866093
ILL.rocG-BSU37790.1~1275	331.608	-1.31528	0.324175	-4.05731	4.96419e-05	0.000172973
ILL.rocR-BSU40350.10~1395	1316.84	-0.451693	0.238713	-1.8922	0.0584641	0.106289
ILL.rodA-BSU38120.102~1283	2344.71	-0.35557	0.184392	-1.92834	0.0538129	0.0987444
ILL.rok-BSU14240.26~601	2730.07	-0.621343	0.202029	-3.07551	0.00210145	0.00545613
ILL.rpe-BSU15790.5~658	2334.91	0.667239	0.239165	2.78987	0.00527297	0.0123354
ILL.rph-BSU28370.20~757	1419.98	-0.734874	0.317343	-2.31571	0.0205741	0.0424623
ILL.rplA-BSU01030.95~793	78746	-1.06176	0.194684	-5.45373	4.93239e-08	2.60874e-07
ILL.rplB-BSU01190.32~865	112020	-0.867093	0.21084	-4.11256	3.91294e-05	0.000138324
ILL.rplC-BSU01160.37~666	70592.5	-0.933672	0.19322	-4.83218	1.35044e-06	5.9546e-06
ILL.rplD-BSU01170.28~651	50977	-0.952634	0.204579	-4.65655	3.21551e-06	1.34337e-05
ILL.rplE-BSU01280.27~566	47394.6	-0.495945	0.241608	-2.05268	0.0401034	0.0765425
ILL.rplF-BSU01310.1~540	43405.9	-0.500262	0.255362	-1.95903	0.0501094	0.0926889
ILL.rplI-BSU40500.1~450	3429.93	0.269506	0.183464	1.46899	0.141836	0.223394
ILL.rplJ-BSU01040.66~566	61948.9	-1.09614	0.225851	-4.85336	1.21385e-06	5.38678e-06
ILL.rplK-BSU01020.63~488	81318.8	-1.74825	0.218682	-7.99446	1.30146e-15	1.33569e-14
ILL.rplL-BSU01050.46~417	55153.3	-0.956358	0.243225	-3.93198	8.42476e-05	0.000281233
ILL.rplM-BSU01490.49~486	55076	-1.29781	0.303806	-4.27185	1.93855e-05	7.26255e-05
ILL.rplN-BSU01260.41~409	30063.5	-0.507904	0.237743	-2.13636	0.0326502	0.0636687
ILL.rplO-BSU01350.31~471	46114.9	-0.4908	0.244619	-2.00639	0.0448151	0.0843291
ILL.rplP-BSU01230.2~436	33373.3	-0.595453	0.233454	-2.55062	0.0107531	0.0238472
ILL.rplQ-BSU01440.1~363	31139.3	-0.536639	0.249821	-2.1481	0.0317061	0.0621205
ILL.rplR-BSU01320.33~395	39770.1	-0.459035	0.308875	-1.48615	0.137239	0.217646
ILL.rplS-BSU16040.11~367	95588.7	-1.86331	0.174419	-10.6829	1.22353e-26	2.64949e-25
ILL.rplT-BSU28850.1~360	15085.9	-1.21682	0.225334	-5.40006	6.66189e-08	3.46586e-07
ILL.rplU-BSU27960.14~322	41793.5	-1.47261	0.245674	-5.99418	2.04513e-09	1.27389e-08
ILL.rplV-BSU01210.1~342	40031.6	-0.680568	0.292188	-2.32921	0.0198479	0.0410866
ILL.rplW-BSU01180.1~288	18802.8	-0.984841	0.245648	-4.00916	6.09356e-05	0.000208634
ILL.rplX-BSU01270.38~349	29964.2	-0.591787	0.30585	-1.9349	0.0530031	0.0974315
ILL.rpmA-BSU27940.2~286	32045.8	-1.14418	0.188636	-6.06555	1.31506e-09	8.41965e-09
ILL.rpmB-BSU15820.77~265	26082.4	-0.805367	0.228074	-3.53116	0.000413739	0.00123021
ILL.rpmC-BSU01240.1~201	8504.24	-0.71099	0.303073	-2.34594	0.0189793	0.0396056
ILL.rpmD-BSU01340.1~180	8510.56	-0.601304	0.316939	-1.89722	0.0577983	0.105264
ILL.rpmE-BSU37070.16~216	15837.2	-1.76351	0.214131	-8.23563	1.78615e-16	1.96476e-15
ILL.rpmE2-BSU30700.121~369	59.6179	-0.573529	0.428322	-1.33901	0.180567	0.272762
ILL.rpmF-BSU15080.22~201	16943.9	-0.857084	0.199204	-4.30255	1.68841e-05	6.37847e-05
ILL.rpmG-BSU00990.93~242	1244.27	-0.373319	0.219074	-1.70408	0.088366	0.15028
ILL.rpmG-BSU24900.23~172	11964.5	-1.78762	0.267213	-6.68986	2.23382e-11	1.7173e-10
ILL.rpmH-BSU41060.140~274	13307.7	-1.85036	0.181376	-10.2018	1.94599e-24	3.56133e-23
ILL.rpmI-BSU28860.13~213	15469.4	-1.26917	0.311374	-4.07604	4.58094e-05	0.000160024
ILL.rpmJ-BSU01400.7~120	8453.09	-0.491294	0.323543	-1.51848	0.128894	0.20695
ILL.rpoA-BSU01430.1~945	143122	-0.628415	0.281472	-2.2326	0.0255752	0.0514906
ILL.rpoB-BSU01070.2~3583	163238	0.255391	0.180628	1.41391	0.15739	0.244907
ILL.rpoC-BSU01080.62~3661	137299	0.3998	0.174745	2.28791	0.0221429	0.0452933
ILL.rpoE-BSU37160.73~594	11376.3	-1.77745	0.199483	-8.9103	5.08933e-19	6.64022e-18
ILL.rpoZ-BSU15690.1~204	1490.8	-0.591573	0.202462	-2.9219	0.00347908	0.00850946
ILL.rpsA-BSU22880.25~1173	24440.1	-0.0819767	0.222103	-0.369093	0.712059	0.796181
ILL.rpsB-BSU16490.60~800	60228.4	-0.919996	0.241537	-3.80893	0.00013957	0.000446797
ILL.rpsC-BSU01220.1~657	51825.6	-0.631669	0.224726	-2.81085	0.0049411	0.0116713
ILL.rpsD-BSU29660.112~714	75454.4	-1.29562	0.210503	-6.15489	7.51273e-10	4.98759e-09
ILL.rpsE-BSU01330.1~501	43088.8	-0.466986	0.270993	-1.72324	0.0848453	0.145429
ILL.rpsF-BSU40910.30~317	38527	-1.32669	0.239313	-5.54374	2.96076e-08	1.62842e-07
ILL.rpsG-BSU01110.10~480	61882.3	-0.996273	0.256198	-3.88868	0.000100791	0.000332435
ILL.rpsH-BSU01300.32~430	40425.6	-0.623962	0.287291	-2.17188	0.0298646	0.0591004
ILL.rpsI-BSU01500.21~413	39235.3	-1.05041	0.253397	-4.14532	3.39343e-05	0.000121412
ILL.rpsJ-BSU01150.113~421	34955.7	-1.10546	0.210133	-5.26076	1.43464e-07	7.149e-07
ILL.rpsK-BSU01420.1~396	49257.6	-0.491644	0.27731	-1.7729	0.0762447	0.132332
ILL.rpsL-BSU01100.114~530	84966.2	-0.990908	0.278348	-3.55996	0.000370908	0.00111004
ILL.rpsM-BSU01410.1~366	42503.8	-0.348856	0.311062	-1.1215	0.262074	0.372488
ILL.rpsN-BSU01290.23~208	18517.6	-0.588806	0.32666	-1.8025	0.0714664	0.125195
ILL.rpsN-BSU08880.104~373	11.89	-1.67508	0.855442	-1.95815	0.0502126	0.0928383
ILL.rpsO-BSU16680.58~327	49935.4	-1.00863	0.216032	-4.66888	3.0284e-06	1.27162e-05
ILL.rpsP-BSU15990.1~273	8236.82	-1.13335	0.190624	-5.94549	2.75635e-09	1.68893e-08
ILL.rpsQ-BSU01250.23~286	18384.4	-0.758787	0.333484	-2.27533	0.0228859	0.0466693
ILL.rpsR-BSU40890.1~240	22781.5	-1.26599	0.246637	-5.13302	2.85125e-07	1.37927e-06
ILL.rpsS-BSU01200.8~286	27071	-0.812379	0.273189	-2.97369	0.00294244	0.00733129
ILL.rpsT-BSU25550.51~317	36305.6	-1.33245	0.219573	-6.06839	1.29203e-09	8.285e-09
ILL.rpsU-BSU25410.11~184	16836.9	-1.16933	0.217062	-5.38709	7.16087e-08	3.71611e-07
ILL.rsbP-BSU34110.36~1247	1541.61	-0.192008	0.196115	-0.979057	0.327552	0.444911
ILL.rsbQ-BSU34100.16~825	1001.45	-0.0945741	0.194087	-0.487278	0.626062	0.727766
ILL.rsbRA-BSU04670.39~863	2402.89	0.157887	0.189748	0.832089	0.405359	0.527553
ILL.rsbRB-BSU13200.12~845	1863.23	-1.36898	0.185593	-7.37624	1.6282e-13	1.45135e-12
ILL.rsbRC-BSU19450.16~864	964.553	0.138947	0.204893	0.678142	0.497681	0.614634
ILL.rsbRD-BSU24760.87~923	69.6592	1.29091	0.394626	3.27122	0.00107083	0.00293698
ILL.rsbS-BSU04680.4~369	1018.05	0.227146	0.196226	1.15757	0.247038	0.354228
ILL.rsbT-BSU04690.4~405	1474.87	0.239186	0.195259	1.22497	0.220587	0.323642
ILL.rsbU-BSU04700.1~1008	3250.17	0.416916	0.184874	2.25513	0.024125	0.0488643
ILL.rsbV-BSU04710.1~330	859.742	0.508105	0.211942	2.39738	0.0165127	0.0348986
ILL.rsbW-BSU04720.1~483	1585.24	0.63061	0.217096	2.90476	0.00367537	0.00894197
ILL.rsbX-BSU04740.1~600	1791.11	0.307171	0.186507	1.64697	0.0995648	0.166856
ILL.rseP-BSU16560.1~1269	12883.6	0.61504	0.182856	3.36352	0.000769548	0.00218153
ILL.rsfA-BSU37620.1~777	14.2015	0.323572	0.871523	0.371272	0.710435	0.795226
ILL.rsgI-BSU13460.1~1146	705.026	-0.0436067	0.200544	-0.217442	0.827864	0.884092
ILL.rsiV-BSU27130.1~858	31.4839	0.230139	0.522499	0.440458	0.659606	0.756143
ILL.rsiW-BSU01740.14~640	5471.38	-1.28025	0.209433	-6.11294	9.78111e-10	6.4112e-09
ILL.rsiX-BSU23090.1~1107	5836.59	-0.381241	0.209782	-1.81732	0.0691677	0.122151
ILL.rsmB-BSU15740.1~1344	6259.95	1.86949	0.178297	10.4852	1.00987e-25	2.03747e-24
ILL.rsoA-BSU33222.1~240	6.84956	-0.31534	1.16022	-0.271793	0.785782	0.853016
ILL.rtp-BSU18490.41~409	88.4519	-0.452128	0.428213	-1.05585	0.291038	0.405433
ILL.rtpA-BSU02530.98~259	14.7519	-2.70706	0.833776	-3.24674	0.00116733	0.00317428
ILL.ruvA-BSU27740.12~617	910.621	-0.514436	0.20035	-2.56768	0.010238	0.0227659
ILL.ruvB-BSU27730.11~1015	1811.02	-0.358434	0.187373	-1.91295	0.0557548	0.101991
ILL.sacA-BSU38040.1~1440	1699.97	0.663249	0.21784	3.04466	0.00232941	0.00598041
ILL.sacB-BSU34450.132~1553	31.9643	-0.871951	0.54232	-1.60782	0.107875	0.178042
ILL.sacC-BSU27030.1~2034	84.7678	-0.413451	0.35632	-1.16033	0.245913	0.353035
ILL.sacP-BSU38050.1~1386	983.247	0.839285	0.273099	3.07319	0.00211787	0.00549185
ILL.sacT-BSU38070.1~831	340.01	1.24803	0.257136	4.85358	1.2125e-06	5.38657e-06
ILL.sacV-BSU04830.9~203	3.67567	-1.69057	1.46777	-1.15179	0.249407	0.35706
ILL.sacX-BSU38410.272~1651	688.634	0.849398	0.205998	4.12332	3.73444e-05	0.000132467
ILL.sacY-BSU38420.1~843	471.847	0.595308	0.240416	2.47616	0.0132805	0.0287281
ILL.safA-BSU27840.1~1164	143.608	1.90208	0.315801	6.02303	1.71187e-09	1.07767e-08
ILL.salA-BSU01540.20~1078	11763.1	-1.03525	0.19289	-5.36706	8.00304e-08	4.13673e-07
ILL.sapB-BSU06650.107~805	715.517	0.791109	0.294815	2.68341	0.00728755	0.0166711
ILL.sat-BSU10920.1~1170	8.46468	0.0701049	1.26984	0.0552078	0.955973	0.975791
ILL.sat-BSU15590.49~1197	4619.88	3.3336	0.298556	11.1658	5.99765e-29	1.46783e-27
ILL.sbcC-BSU10650.1~3393	3360.42	0.315565	0.193982	1.62677	0.103785	0.172669
ILL.sbcD-BSU10640.8~1183	816.669	0.463832	0.212229	2.18553	0.02885	0.0573671
ILL.sboA-BSU37350.33~164	3.06303	0.817725	1.58502	0.515909	0.605918	0.710541
ILL.sboX-BSU37360.1~153	2.22778	-0.675014	2.11979	-0.318434	0.750155	0.828034
ILL.sbp-BSU15270.1~366	1171.5	0.424585	0.259979	1.63315	0.102438	0.170934
ILL.scoA-BSU38990.1~717	35.1252	0.390605	0.587652	0.664688	0.50625	0.621136
ILL.scoB-BSU38980.1~651	46.8608	0.170405	0.436716	0.390197	0.696391	0.785029
ILL.scpA-BSU23220.36~791	1476.26	-0.939701	0.243799	-3.85441	0.000116009	0.000376325
ILL.scr-BSU-misc-RNA-2.1~103	21693.3	-0.264517	1.25998	-0.209938	0.833716	0.88705
ILL.scuA-BSU21750.148~729	1280.35	3.13924	0.204804	15.328	4.96826e-53	5.01188e-51
ILL.sda-BSU25690.26~184	109.361	-0.908354	0.34518	-2.63154	0.00849993	0.0192634
ILL.sdaAA-BSU15860.26~928	2901.5	1.38244	0.190914	7.24119	4.44769e-13	3.88094e-12
ILL.sdaAB-BSU15850.75~737	1940.13	1.23078	0.192742	6.38566	1.70659e-10	1.22119e-09
ILL.sdhA-BSU28440.1~1761	38071.6	0.0812888	0.189156	0.429745	0.667381	0.761669
ILL.sdhB-BSU28430.3~764	18029.1	0.21737	0.182268	1.19258	0.233033	0.338303
ILL.sdhC-BSU28450.26~634	8625.05	-0.100162	0.199593	-0.501831	0.615787	0.71961
ILL.sdpA-BSU33750.52~528	73.1707	-0.403947	0.399603	-1.01087	0.312078	0.426733
ILL.sdpB-BSU33760.1~972	57.7314	0.0790704	0.602603	0.131215	0.895606	0.932115
ILL.sdpI-BSU33780.1~624	421.715	-0.00225832	0.275767	-0.00818926	0.993466	0.995957
ILL.sdpR-BSU33790.47~319	190.009	-0.131474	0.272766	-0.482004	0.629803	0.73078
ILL.seaA-BSU22850.1~894	305.351	2.82204	0.273032	10.3359	4.84673e-25	9.23783e-24
ILL.secA-BSU35300.168~2693	19766.6	0.114276	0.179455	0.636795	0.524258	0.63812
ILL.secDF-BSU27650.1~2214	12609.8	-0.270978	0.178688	-1.51649	0.129396	0.207596
ILL.secE-BSU01000.34~213	1085.34	-0.70675	0.20714	-3.41195	0.000644992	0.00185256
ILL.secG-BSU33630.39~269	4424.78	-0.696374	0.237999	-2.92596	0.00343394	0.00841896
ILL.secY-BSU01360.2~1297	123068	-0.458737	0.281569	-1.62922	0.103267	0.172014
ILL.senS-BSU08810.72~290	0.214992	1.05655	4.99658	0.211455	0.832532	NA
ILL.sepF-BSU15390.1~450	3340.31	0.584763	0.199161	2.93613	0.00332332	0.00818171
ILL.serA-BSU23070.33~1610	37121.7	2.47035	0.202862	12.1775	4.09813e-34	1.32421e-32
ILL.serC-BSU10020.31~1110	9119.31	1.22783	0.180861	6.78881	1.13061e-11	8.90703e-11
ILL.serS-BSU00130.57~1334	4483.01	-2.87746	0.186752	-15.4079	1.4476e-53	1.5352e-51
ILL.sigA-BSU25200.129~1244	16508.6	-0.376429	0.179473	-2.09741	0.035957	0.0692034
ILL.sigB-BSU04730.1~789	2201.97	0.524934	0.185134	2.83544	0.00457633	0.0109093
ILL.sigD-BSU16470.1~765	5733.79	2.18778	0.178545	12.2534	1.61175e-34	5.46409e-33
ILL.sigE-BSU15320.63~782	25.8858	0.0282744	0.572134	0.0494192	0.960585	0.979049
ILL.sigF-BSU23450.1~768	73.4029	1.26469	0.500403	2.52734	0.0114929	0.0252709
ILL.sigG-BSU15330.1~783	143.608	-0.873329	0.29026	-3.00878	0.00262295	0.00660869
ILL.sigH-BSU00980.5~661	4549.58	-0.161561	0.185581	-0.870569	0.383989	0.505629
ILL.sigI-BSU13450.5~760	335.836	0.103466	0.241133	0.429083	0.667863	0.762009
ILL.sigL-BSU34200.13~1323	915.578	-0.634195	0.205763	-3.08216	0.00205501	0.00536116
ILL.sigM-BSU09520.18~509	531.191	-0.367945	0.212085	-1.7349	0.082759	0.142384
ILL.sigO-BSU33230.1~531	25.8813	-0.718786	0.57174	-1.25719	0.208685	0.309141
ILL.sigV-BSU27120.1~501	10.2055	0.683234	0.90023	0.758954	0.44788	0.567175
ILL.sigW-BSU01730.58~621	5041.48	-1.37456	0.242939	-5.65805	1.53106e-08	8.71039e-08
ILL.sigX-BSU23100.40~624	3020.77	-0.280947	0.187893	-1.49525	0.134849	0.214514
ILL.sigY-BSU38700.1~537	90.217	0.302904	0.338475	0.894908	0.370836	0.492385
ILL.sigZ-BSU26840.23~553	63.1013	-0.274394	0.402186	-0.682256	0.495077	0.612502
ILL.sinI-BSU24600.100~273	118.314	-1.27403	0.314303	-4.05352	5.04531e-05	0.000175504
ILL.sinR-BSU24610.2~337	1423.83	-0.439853	0.210927	-2.08533	0.0370397	0.0711547
ILL.sipS-BSU23310.1~555	3623.83	0.416921	0.190741	2.1858	0.02883	0.0573549
ILL.sipT-BSU14410.35~616	1507.6	-0.121822	0.229297	-0.531285	0.595221	0.701178
ILL.sipU-BSU04010.1~564	829.624	-1.97021	0.226252	-8.70807	3.0909e-18	3.81611e-17
ILL.sipV-BSU10490.2~508	363.716	-0.723469	0.238874	-3.02866	0.00245643	0.00625603
ILL.sipW-BSU24630.1~573	17.2106	-4.65425	1.15626	-4.02528	5.69076e-05	0.000196305
ILL.sirB-BSU15620.1~786	4116.45	2.38421	0.247882	9.61831	6.69231e-22	1.04058e-20
ILL.sirC-BSU15630.1~489	2600.83	2.37714	0.235382	10.0991	5.57708e-24	9.94258e-23
ILL.skfA-BSU01910.44~211	103.212	-0.681461	0.328249	-2.07605	0.0378898	0.0726808
ILL.skfB-BSU01920.67~1299	124.397	-0.397161	0.31504	-1.26067	0.207429	0.30761
ILL.skfC-BSU01935.1~1491	150.827	0.160721	0.311903	0.515292	0.606349	0.710748
ILL.skfE-BSU01950.19~738	118.052	0.439002	0.355749	1.23402	0.217195	0.319603
ILL.skfF-BSU01960.1~1344	123.717	0.152621	0.30625	0.498354	0.618235	0.72171
ILL.skfG-BSU01970.6~521	47.5839	0.730371	0.522921	1.39671	0.1625	0.251178
ILL.skfH-BSU01980.5~430	59.0233	0.594835	0.404583	1.47024	0.141496	0.223029
ILL.sleB-BSU22930.1~918	15.8377	1.10626	0.817685	1.35291	0.176083	0.26716
ILL.slp-BSU14620.12~386	105.463	0.45807	0.33769	1.35648	0.174947	0.265827
ILL.slrA-BSU38229.168~326	401.174	-1.30643	0.274547	-4.75852	1.9502e-06	8.40212e-06
ILL.slrR-BSU34380.1~459	7.587	-2.94624	1.27887	-2.30378	0.0212347	0.0436082
ILL.smc-BSU15940.9~3569	17998.8	0.94493	0.172462	5.47907	4.27571e-08	2.28248e-07
ILL.smpB-BSU33600.1~471	2640.96	0.16294	0.183102	0.889891	0.373524	0.495318
ILL.sodA-BSU25020.37~645	29693.9	-0.877676	0.202383	-4.3367	1.44638e-05	5.53911e-05
ILL.sodC-BSU19400.93~683	360.847	4.28809	0.296635	14.4558	2.30421e-47	1.58837e-45
ILL.sodF-BSU19330.1~846	13.1011	0.99281	0.926893	1.07112	0.284117	0.397733
ILL.spbC-BSU33770.43~654	708.369	1.725	0.23304	7.40214	1.34009e-13	1.21018e-12
ILL.spcB-BSU23210.1~594	1228.36	-0.8058	0.226969	-3.55027	0.000384837	0.00114827
ILL.speA-BSU14630.27~1499	5353.86	-1.49992	0.199055	-7.53521	4.87536e-14	4.5621e-13
ILL.speB-BSU37490.61~933	5253.76	-0.721216	0.199386	-3.61718	0.000297828	0.000908421
ILL.speD-BSU29010.118~498	12343.4	-1.10291	0.185155	-5.95669	2.57394e-09	1.5842e-08
ILL.speE-BSU37500.27~857	5749.61	-1.41793	0.180369	-7.86124	3.80344e-15	3.81821e-14
ILL.splA-BSU13920.91~330	229.238	0.918203	0.30451	3.01535	0.00256686	0.00649727
ILL.splB-BSU13930.1~1029	826.537	1.02042	0.253329	4.02802	5.62486e-05	0.000194356
ILL.spmA-BSU23180.1~591	46.1951	0.233084	0.487264	0.478353	0.632399	0.732867
ILL.spmB-BSU23170.1~537	41.8095	0.388692	0.538385	0.721959	0.47032	0.588908
ILL.spo0A-BSU24220.196~999	4315.28	0.122478	0.192007	0.637883	0.52355	0.637665
ILL.spo0B-BSU27930.321~899	2466.96	0.327323	0.263974	1.23998	0.214983	0.31722
ILL.spo0E-BSU13640.48~305	685.929	0.0170135	0.258718	0.0657608	0.947568	0.970565
ILL.spo0F-BSU37130.1~375	418.32	-0.0443803	0.238193	-0.186321	0.852193	0.900989
ILL.spo0M-BSU08760.7~783	4270.33	-1.80816	0.177341	-10.196	2.06692e-24	3.76434e-23
ILL.spoIIAA-BSU23470.14~367	26.9381	0.695885	0.712598	0.976547	0.328794	0.446305
ILL.spoIIAB-BSU23460.1~441	47.3944	1.38384	0.55499	2.49345	0.0126508	0.0275242
ILL.spoIIB-BSU28060.117~1115	36.6005	0.659851	0.494006	1.33572	0.181642	0.273987
ILL.spoIID-BSU36750.152~1183	533.342	0.666655	0.236793	2.81535	0.00487242	0.0115552
ILL.spoIIE-BSU00640.200~2683	981.04	0.634298	0.306487	2.06958	0.0384921	0.0737736
ILL.spoIIGA-BSU15310.155~1084	16.5758	-0.0790572	0.692614	-0.114143	0.909124	0.940644
ILL.spoIIIAA-BSU24430.1~924	6.1299	-0.0129441	1.13399	-0.0114146	0.990893	0.994621
ILL.spoIIIAB-BSU24420.1~516	3.72968	-0.919598	1.63751	-0.561585	0.574399	0.683659
ILL.spoIIIAC-BSU24410.1~207	0.487007	-0.345718	4.23455	-0.0816421	0.934931	NA
ILL.spoIIIAD-BSU24400.1~402	4.73213	-0.506507	1.27381	-0.397633	0.690901	0.779907
ILL.spoIIIAE-BSU24390.1~1200	12.4587	0.0343371	0.804665	0.0426725	0.965963	0.982039
ILL.spoIIIAF-BSU24380.1~621	8.05407	0.693026	1.03996	0.666394	0.505159	0.620808
ILL.spoIIIAG-BSU24370.1~690	9.85474	0.714801	0.932763	0.766326	0.443482	0.564209
ILL.spoIIIAH-BSU24360.1~657	17.0636	-0.165647	0.684904	-0.241854	0.808893	0.868965
ILL.spoIIID-BSU36420.9~290	7.21726	-2.17976	1.10656	-1.96986	0.0488547	0.090774
ILL.spoIIIE-BSU16800.70~2439	4462.32	1.28203	0.217601	5.89167	3.82314e-09	2.31516e-08
ILL.spoIIIJ-BSU41040.1~786	7018.43	-1.95679	0.20427	-9.57943	9.75846e-22	1.51165e-20
ILL.spoIIM-BSU23530.101~745	20.9626	0.47928	0.637824	0.75143	0.452394	0.571853
ILL.spoIIP-BSU25530.63~1268	149.647	2.55367	0.322916	7.90815	2.61249e-15	2.64834e-14
ILL.spoIIQ-BSU36550.1~852	96.8437	-0.192354	0.391301	-0.491577	0.623018	0.725271
ILL.spoIIR-BSU36970.1~675	133.333	1.88607	0.317286	5.94439	2.7749e-09	1.69778e-08
ILL.spoIISA-BSU12830.1~747	919.854	0.318218	0.196408	1.62019	0.105192	0.174589
ILL.spoIISB-BSU12820.1~171	545.112	0.811447	0.235833	3.44076	0.00058008	0.0016813
ILL.spoIVA-BSU22800.135~1613	486.096	2.75313	0.240522	11.4464	2.44983e-30	6.41296e-29
ILL.spoIVB-BSU24230.1~1281	194.59	2.62734	0.321851	8.1632	3.26256e-16	3.50492e-15
ILL.spoIVCA-BSU25770.9~1511	355.48	-0.0289858	0.240226	-0.120661	0.90396	0.937183
ILL.spoIVFA-BSU27980.150~944	179.683	1.0475	0.285898	3.6639	0.000248402	0.00076958
ILL.spoIVFB-BSU27970.1~867	140.224	1.19582	0.314687	3.80004	0.00014467	0.000462052
ILL.spoVAA-BSU23440.1~621	0.865352	3.05392	3.30991	0.922659	0.356185	NA
ILL.spoVAB-BSU23430.1~426	0.655743	2.65207	3.65096	0.726404	0.467591	NA
ILL.spoVAC-BSU23420.1~453	0.655743	2.65207	3.65096	0.726404	0.467591	NA
ILL.spoVAD-BSU23410.1~1017	11.4082	2.22052	0.961202	2.31015	0.02088	0.0430293
ILL.spoVAEA-BSU23401.8~619	21.9258	0.916798	0.633326	1.44759	0.147731	0.231796
ILL.spoVAEB-BSU23402.1~351	5.92873	0.975082	1.15833	0.841802	0.399899	0.52275
ILL.spoVAF-BSU23390.1~1482	276.626	0.92936	0.286903	3.23928	0.00119833	0.00325216
ILL.spoVB-BSU27670.116~1672	30.2996	-0.437008	0.548056	-0.797378	0.425231	0.547047
ILL.spoVD-BSU15170.81~2021	437.589	1.95334	0.245798	7.94694	1.91177e-15	1.95237e-14
ILL.spoVE-BSU15210.1~1101	4551.15	-0.169781	0.192658	-0.881258	0.378178	0.500206
ILL.spoVFA-BSU16730.1~894	64.5118	3.15967	0.481901	6.55667	5.50209e-11	4.09292e-10
ILL.spoVFB-BSU16740.1~603	69.7525	2.97681	0.46895	6.34781	2.18404e-10	1.54678e-09
ILL.spoVG-BSU00490.1~294	2594.95	0.288325	0.353155	0.816427	0.414256	0.535593
ILL.spoVID-BSU28110.18~1745	262.057	3.10862	0.318085	9.77292	1.47153e-22	2.41518e-21
ILL.spoVIF-BSU11810.1~255	7.91214	4.74013	1.70299	2.78342	0.00537891	0.012569
ILL.spoVK-BSU17420.503~1471	460.067	3.26142	0.310737	10.4958	9.03506e-26	1.83182e-24
ILL.spoVM-BSU15810.1~81	99.8541	1.57097	0.418146	3.75699	0.000171967	0.00054253
ILL.spoVR-BSU09400.1~1407	59.0359	-0.0814131	0.421029	-0.193367	0.846672	0.897301
ILL.spoVS-BSU16980.69~329	1238.95	0.411318	0.254174	1.61825	0.105608	0.175138
ILL.spoVT-BSU00560.1~537	1470.15	0.369123	0.192604	1.91649	0.0553025	0.101253
ILL.sppA-BSU29530.104~1111	3738.32	-2.51462	0.216095	-11.6366	2.68478e-31	7.55392e-30
ILL.spsA-BSU37910.1~771	18.9267	0.373662	0.65941	0.566661	0.570944	0.680972
ILL.spsB-BSU37900.1~1425	36.2393	0.438259	0.514936	0.851095	0.394717	0.51712
ILL.spsC-BSU37890.1~1170	45.6533	0.387897	0.446244	0.86925	0.38471	0.506417
ILL.spsD-BSU37880.1~870	42.2158	0.505391	0.470968	1.07309	0.283231	0.397325
ILL.spsE-BSU37870.1~1122	43.8332	0.826613	0.468044	1.7661	0.0773793	0.134077
ILL.spsF-BSU37860.1~723	38.2589	0.599729	0.484302	1.23834	0.215591	0.317665
ILL.spsG-BSU37850.1~1020	44.5299	0.101977	0.448727	0.227259	0.820223	0.878858
ILL.spsI-BSU37840.25~765	111.404	-0.331885	0.342829	-0.968077	0.333006	0.450838
ILL.spsJ-BSU37830.1~948	164.911	-0.107652	0.287272	-0.37474	0.707854	0.79298
ILL.spsK-BSU37820.5~856	126.304	0.203108	0.321597	0.631561	0.527674	0.640663
ILL.spsL-BSU37810.1~456	57.6534	0.69192	0.437038	1.5832	0.113375	0.185637
ILL.spxA-BSU11500.1~396	4156.48	-1.27762	0.221653	-5.76405	8.21172e-09	4.79036e-08
ILL.sqhC-BSU19320.101~1999	155.906	1.35456	0.28868	4.69225	2.70213e-06	1.14158e-05
ILL.srfAA-BSU03480.298~11061	45708.3	-3.7566	0.230527	-16.2957	1.05846e-59	1.82408e-57
ILL.srfAB-BSU03490.13~10764	45822	-3.40761	0.228146	-14.9361	1.91974e-50	1.62042e-48
ILL.srfAC-BSU03510.1~3828	16571	-3.4702	0.220576	-15.7325	9.06284e-56	1.10247e-53
ILL.srfAD-BSU03520.29~757	3259.54	-3.55453	0.245089	-14.503	1.15996e-47	8.41685e-46
ILL.ssbA-BSU40900.1~519	80297.4	-1.18027	0.277252	-4.25703	2.07158e-05	7.72593e-05
ILL.ssbB-BSU36310.1~342	237.224	-0.965638	0.350042	-2.75863	0.00580435	0.0135021
ILL.sspA-BSU29570.4~213	474.13	-0.439569	0.217784	-2.01837	0.0435524	0.0823276
ILL.sspB-BSU09750.35~238	3.91218	-2.99126	1.64689	-1.81631	0.0693231	0.122269
ILL.sspC-BSU19950.119~337	5.88786	1.26798	1.2164	1.0424	0.297224	0.411832
ILL.sspD-BSU13470.131~325	19.9562	0.322137	0.684723	0.470463	0.638024	0.737114
ILL.sspE-BSU08660.1~255	1136.85	-1.22265	0.19247	-6.35241	2.11962e-10	1.50373e-09
ILL.sspF-BSU00450.160~345	115.219	0.678161	0.449594	1.50839	0.131456	0.210166
ILL.sspG-BSU32640.159~305	0.916992	1.2191	2.92973	0.416112	0.677328	NA
ILL.sspH-BSU08110.54~233	89.2049	-0.312889	0.355224	-0.880821	0.378415	0.500359
ILL.sspI-BSU28660.50~265	22.3628	-0.075031	0.643888	-0.116528	0.907234	0.939489
ILL.sspJ-BSU33340.167~307	19.9926	0.563104	0.690933	0.81499	0.415078	0.536488
ILL.sspK-BSU08550.108~260	4.40847	-0.04716	1.2977	-0.0363412	0.97101	0.984338
ILL.sspL-BSU22000.42~170	65.1555	0.593888	0.38919	1.52596	0.12702	0.204259
ILL.sspM-BSU22290.1~105	2.04661	-0.407249	1.93148	-0.210848	0.833006	0.88705
ILL.sspN-BSU18020.65~211	67.3014	5.5522	0.792176	7.00879	2.40386e-12	1.99646e-11
ILL.sspO-BSU17990.1~147	0.521661	-0.424574	4.14389	-0.102458	0.918393	NA
ILL.sspP-BSU17980.1~147	0.220375	1.07454	4.9953	0.215109	0.829682	NA
ILL.ssrA-BSU-misc-RNA-55.1~362	72323.2	0.173682	0.218135	0.79621	0.42591	0.547409
ILL.ssuA-BSU08840.1~999	5.35158	3.07813	1.4828	2.07589	0.0379044	0.0726808
ILL.ssuB-BSU08830.1~768	4.66034	3.93109	1.86234	2.11083	0.034787	0.0672018
ILL.ssuC-BSU08850.1~831	7.79737	1.02771	1.01615	1.01138	0.311835	0.426645
ILL.ssuD-BSU08860.1~1131	23.9168	1.49464	0.623176	2.39843	0.0164655	0.0348166
ILL.stoA-BSU13840.5~502	250.505	-0.650352	0.245282	-2.65145	0.00801471	0.0182398
ILL.sucA-BSU19370.95~2929	104381	-0.0641124	0.216374	-0.296303	0.766999	0.839256
ILL.sucC-BSU16090.7~1164	45158.1	0.774525	0.182342	4.24766	2.16014e-05	8.02726e-05
ILL.sucD-BSU16100.29~931	31098.5	0.943721	0.206536	4.56927	4.89418e-06	1.99629e-05
ILL.sufB-BSU32670.21~1418	39651.8	0.100243	0.178324	0.562141	0.57402	0.683404
ILL.sufC-BSU32710.194~979	17000.2	-0.0576873	0.18222	-0.316581	0.751561	0.829057
ILL.sufD-BSU32700.18~1331	27868.4	0.143414	0.17202	0.833705	0.404447	0.526698
ILL.sufS-BSU32690.1~1221	23333.4	0.334052	0.179957	1.85628	0.0634131	0.113294
ILL.suhB-BSU14670.24~821	1004.54	0.209131	0.217511	0.961471	0.336315	0.45413
ILL.sul-BSU00770.1~858	2353.61	0.791707	0.198576	3.98693	6.6933e-05	0.000228035
ILL.sumT-BSU15610.99~872	3917.57	3.09869	0.328958	9.41972	4.52285e-21	6.80237e-20
ILL.sunA-BSU21480.55~225	2183.74	1.35844	0.326157	4.165	3.11351e-05	0.000112173
ILL.sunI-BSU21490.18~335	2221.91	-0.412195	0.827644	-0.498034	0.61846	0.721769
ILL.sunT-BSU21470.58~2175	1001.44	-0.808227	0.287192	-2.81423	0.00488936	0.0115888
ILL.swrC-BSU06710.5~3202	13265.2	-0.754895	0.194705	-3.87712	0.000105699	0.000346135
ILL.tadA-BSU00180.86~571	9602.58	0.0214005	1.24246	0.0172242	0.986258	0.991773
ILL.tagA-BSU35750.64~834	4382.62	-0.931206	0.192071	-4.84823	1.24568e-06	5.51621e-06
ILL.tagB-BSU35760.33~1178	2976.13	0.180438	0.329493	0.547623	0.583951	0.690853
ILL.tagC-BSU35770.5~1333	254.264	-0.870866	0.250694	-3.47381	0.000513118	0.00149665
ILL.tagD-BSU35740.114~503	5476.77	-1.17418	0.229782	-5.10997	3.22216e-07	1.54246e-06
ILL.tagE-BSU35730.161~2182	11734.5	0.927304	0.239675	3.86901	0.00010928	0.000355892
ILL.tagF-BSU35720.1~2241	18021.7	1.26542	0.206418	6.13035	8.76856e-10	5.77496e-09
ILL.tagG-BSU35710.165~992	6104.06	1.78758	0.239001	7.47937	7.46823e-14	6.86413e-13
ILL.tagH-BSU35700.1~1584	19613.3	1.81871	0.208778	8.71121	3.00652e-18	3.72304e-17
ILL.tagO-BSU35530.63~1139	5281.03	-0.399573	0.228932	-1.74538	0.0809183	0.139565
ILL.tasA-BSU24620.14~799	162.124	-3.05405	0.389152	-7.84797	4.22833e-15	4.21406e-14
ILL.tatAC-BSU17710.24~212	446.348	0.36135	0.256026	1.41138	0.158132	0.245693
ILL.tatAD-BSU02630.13~225	9.75146	1.04185	0.979131	1.06406	0.287303	0.401448
ILL.tatAY-BSU05980.22~195	687.851	-0.101188	0.267149	-0.37877	0.704859	0.790506
ILL.tatCD-BSU02640.1~729	9.54506	1.25999	0.936579	1.34532	0.178523	0.270268
ILL.tatCY-BSU05990.1~765	2519.79	-0.267151	0.221316	-1.20711	0.227391	0.331977
ILL.tcyA-BSU03610.1~807	3946.61	-1.41858	0.213	-6.66002	2.73786e-11	2.09312e-10
ILL.tcyB-BSU03600.1~705	2045.19	-0.419195	0.213569	-1.9628	0.049669	0.0919978
ILL.tcyC-BSU03590.1~744	2154.95	-0.554696	0.196493	-2.82298	0.00475801	0.0113164
ILL.tcyJ-BSU29380.2~811	2.22156	-0.0624301	1.7678	-0.0353151	0.971828	0.984685
ILL.tcyK-BSU29370.12~824	5.40623	1.43993	1.33337	1.07992	0.280178	0.394021
ILL.tcyL-BSU29360.1~720	2.02425	2.64731	2.40849	1.09916	0.271698	0.383661
ILL.tcyM-BSU29350.1~708	1.74532	0.0198929	2.03884	0.00975699	0.992215	0.995102
ILL.tcyN-BSU29340.1~780	4.9717	0.941499	1.24555	0.755891	0.449715	0.568814
ILL.tcyP-BSU09130.17~1408	3023.03	-1.58049	0.771534	-2.0485	0.0405108	0.0771776
ILL.tdh-BSU16990.106~1149	1207.44	-0.762906	0.234855	-3.24842	0.00116048	0.00316041
ILL.tdk-BSU37060.89~676	1680.21	0.0172502	0.244608	0.0705217	0.943778	0.968122
ILL.tenA-BSU11650.79~789	96.7633	0.997366	0.337884	2.9518	0.00315928	0.00780571
ILL.tenI-BSU11660.1~618	90.9695	1.00615	0.343771	2.9268	0.00342466	0.00841117
ILL.tepA-BSU16790.56~793	327.231	2.832	0.295897	9.57091	1.05967e-21	1.63537e-20
ILL.tetB-BSU40770.122~1498	1917.87	-0.121394	0.200756	-0.604684	0.545389	0.655926
ILL.tgl-BSU31270.158~895	60.1795	-0.237566	0.399923	-0.59403	0.552492	0.663697
ILL.tgt-BSU27710.27~1172	5892.14	-0.574141	0.174259	-3.29476	0.000985073	0.00272344
ILL.thiC-BSU08790.133~1905	1226.89	2.31777	0.221232	10.4766	1.10613e-25	2.21012e-24
ILL.thiD-BSU38020.15~830	4483.85	0.542372	0.193849	2.7979	0.00514357	0.0120737
ILL.thiE-BSU38290.1~669	777.669	-0.637129	0.220534	-2.88903	0.00386428	0.00935206
ILL.thiF-BSU11700.1~1011	182.7	0.830816	0.29082	2.85681	0.00427928	0.0102485
ILL.thiG-BSU11690.1~771	119.654	0.881658	0.354591	2.4864	0.0129041	0.0280018
ILL.thiL-BSU05900.107~1084	5229.94	2.3675	0.195498	12.1101	9.33264e-34	2.92423e-32
ILL.thiM-BSU38300.8~826	715.842	-0.581036	0.206766	-2.81012	0.00495238	0.0116912
ILL.thiN-BSU15800.73~717	1988.51	1.87486	0.192447	9.74223	1.99129e-22	3.22979e-21
ILL.thiO-BSU11670.1~1110	150.844	0.938721	0.321129	2.92319	0.0034646	0.00848407
ILL.thiS-BSU11680.1~201	21.1453	0.501488	0.626387	0.800604	0.423361	0.545149
ILL.thiT-BSU30990.100~678	264.806	-2.33043	0.273352	-8.52538	1.5231e-17	1.78457e-16
ILL.thiU-BSU13240.97~699	86.0218	1.32767	0.36524	3.63506	0.000277921	0.000854633
ILL.thiV-BSU13230.2~601	89.8437	2.10641	0.4359	4.83233	1.34946e-06	5.9546e-06
ILL.thiW-BSU13220.1~1644	288.629	1.83915	0.254369	7.23027	4.82033e-13	4.17336e-12
ILL.thiX-BSU13210.1~765	143.164	1.7599	0.310599	5.66614	1.46052e-08	8.34355e-08
ILL.thrB-BSU32240.1~930	9851.59	3.33914	0.214766	15.5478	1.6456e-54	1.89062e-52
ILL.thrC-BSU32250.1~1059	11666.4	3.1744	0.208654	15.2137	2.86752e-52	2.69547e-50
ILL.thrS-BSU28950.44~1975	9874.39	-3.05265	0.192599	-15.8498	1.41057e-56	1.88197e-54
ILL.thrZ-BSU37560.54~1970	173.846	-1.02517	0.435805	-2.35236	0.0186548	0.0389482
ILL.thyA-BSU17680.22~861	826.282	-0.0270771	0.210495	-0.128636	0.897646	0.933588
ILL.thyA-BSU21820.84~878	3057.4	1.36463	0.186976	7.29843	2.91152e-13	2.57309e-12
ILL.tig-BSU28230.84~1358	63058.5	-1.35449	0.180055	-7.52265	5.36757e-14	5.00006e-13
ILL.tilS-BSU00670.1~1419	5112.02	-0.603488	0.181364	-3.3275	0.000876299	0.00245554
ILL.tkt-BSU17890.1~2004	37905.5	-0.494424	0.21976	-2.24983	0.0244595	0.0494878
ILL.tlp-BSU18030.37~288	114.094	3.92861	0.44373	8.85362	8.47262e-19	1.09167e-17
ILL.tlpA-BSU31250.5~1993	1005.26	3.99104	0.247785	16.1069	2.28305e-58	3.4973e-56
ILL.tlpB-BSU31230.1~1989	7515.78	2.90242	0.196883	14.7418	3.47176e-49	2.81553e-47
ILL.tlpC-BSU03440.11~1732	1239.05	1.11521	0.196367	5.67921	1.35315e-08	7.76231e-08
ILL.tmk-BSU00280.1~639	1895.57	0.668172	0.196279	3.4042	0.00066359	0.00189807
ILL.tmrB-BSU03140.5~598	145.853	-0.819617	0.30743	-2.66603	0.00767536	0.0175002
ILL.tnrA-BSU13310.1~333	189.233	-0.0816951	0.27247	-0.299831	0.764306	0.837944
ILL.topA-BSU16120.1~2076	9711.15	-0.0539616	0.182147	-0.296253	0.767037	0.839256
ILL.topB-BSU04260.14~2197	4504.58	0.0524921	0.180079	0.291495	0.770672	0.842187
ILL.tpiA-BSU33920.19~780	10232.8	-0.890316	0.244789	-3.63707	0.000275754	0.000848601
ILL.tpx-BSU29490.14~517	5948.4	-0.691883	0.345643	-2.00173	0.0453141	0.0851906
ILL.treA-BSU07810.1~1686	23150.4	0.20869	0.200043	1.04323	0.296843	0.411441
ILL.treP-BSU07800.1~1413	18780.6	-0.649854	0.191177	-3.39922	0.000675771	0.00192758
ILL.treR-BSU07820.14~730	11124.7	0.116981	0.186773	0.626327	0.5311	0.643042
ILL.trmB-BSU29900.1~642	4236.83	-0.749103	0.188233	-3.97966	6.90127e-05	0.000234348
ILL.trmD-BSU16030.1~732	5758.6	0.820623	0.183533	4.47125	7.77624e-06	3.07775e-05
ILL.trmE-BSU41020.112~1491	5259.07	-0.689918	0.207102	-3.33129	0.000864445	0.00242561
ILL.trmK-BSU25180.86~736	1701.56	0.0782261	0.206425	0.378957	0.70472	0.790506
ILL.trpA-BSU22630.1~804	2253.04	0.534296	0.184026	2.90337	0.00369168	0.00897109
ILL.trpB-BSU22640.1~1203	98.8659	2.01536	0.357349	5.63974	1.70309e-08	9.64931e-08
ILL.trpC-BSU22660.1~750	27.9477	1.69105	0.631939	2.67597	0.00745138	0.0170176
ILL.trpD-BSU22670.1~1017	72.7614	2.03724	0.565288	3.6039	0.000313475	0.000951932
ILL.trpE-BSU22680.141~1688	515.082	1.83216	0.270283	6.7787	1.21265e-11	9.53518e-11
ILL.trpF-BSU22650.1~648	13.1621	2.07789	0.864943	2.40234	0.0162904	0.0345347
ILL.trpP-BSU10010.30~548	5370.38	0.611192	0.245105	2.49359	0.0126458	0.0275242
ILL.trpS-BSU11420.59~1051	4095.15	-0.109212	0.193811	-0.563496	0.573097	0.682699
ILL.truA-BSU01480.1~744	10018.5	0.635777	0.394382	1.61208	0.106944	0.176787
ILL.truB-BSU16660.82~1011	1667.59	0.789399	0.208738	3.78178	0.000155711	0.00049426
ILL.trxA-BSU28500.1~315	3858.3	-0.973287	0.214507	-4.53732	5.69734e-06	2.29671e-05
ILL.trxB-BSU34790.193~1143	11255	1.90049	0.253436	7.49887	6.43685e-14	5.94259e-13
ILL.tsf-BSU16500.102~983	46241.7	-1.35465	0.198549	-6.82277	8.93035e-12	7.06232e-11
ILL.tuaB-BSU35600.812~2263	235.395	2.92044	0.315136	9.26724	1.91034e-20	2.7821e-19
ILL.tuaC-BSU35590.1~1170	196.853	2.17855	0.281566	7.73725	1.01589e-14	9.8401e-14
ILL.tuaD-BSU35580.1~1386	274.903	2.26597	0.275552	8.22338	1.9784e-16	2.17047e-15
ILL.tuaE-BSU35570.1~1467	251.17	1.8116	0.265254	6.82969	8.50991e-12	6.80793e-11
ILL.tuaF-BSU35560.29~709	126.183	1.77641	0.319067	5.56752	2.58384e-08	1.43446e-07
ILL.tuaG-BSU35550.7~765	162.901	1.83358	0.302364	6.06414	1.32662e-09	8.48052e-09
ILL.tuaH-BSU35540.1~1194	216.371	1.5277	0.263712	5.79308	6.91082e-09	4.06011e-08
ILL.tufA-BSU01130.23~1213	313028	-0.802005	0.209631	-3.8258	0.00013035	0.000418903
ILL.tyrA-BSU22610.49~1164	3600.25	-0.166467	0.19754	-0.842702	0.399395	0.522422
ILL.tyrS-BSU29670.189~1457	5507.97	-2.57237	0.200244	-12.8462	9.0359e-38	3.74379e-36
ILL.tyrZ-BSU38460.42~1283	78.1728	-1.5784	0.391451	-4.03219	5.52598e-05	0.000191259
ILL.ubiD-BSU03640.1~1422	100.803	-0.4761	0.347152	-1.37144	0.170236	0.260487
ILL.ubiE-BSU22750.7~708	3388.78	0.461047	0.19194	2.40203	0.0163043	0.0345465
ILL.udk-BSU27330.7~642	5915.97	-0.950214	0.222719	-4.26643	1.98625e-05	7.42779e-05
ILL.ugtP-BSU21920.1~1149	7729.89	0.334632	0.183157	1.82702	0.0676967	0.119912
ILL.ung-BSU37970.14~691	1139.34	-0.211572	0.199723	-1.05933	0.289449	0.403628
ILL.upp-BSU36890.135~764	8205.59	-1.24458	0.18101	-6.87574	6.16684e-12	4.9914e-11
ILL.uppS-BSU16530.131~913	7075.84	1.18729	0.174	6.82347	8.88667e-12	7.04124e-11
ILL.ureA-BSU36660.819~1136	42.1193	1.94924	0.525562	3.70887	0.000208182	0.000649353
ILL.ureB-BSU36650.1~375	32.8108	1.28577	0.540044	2.38087	0.0172719	0.0363359
ILL.ureC-BSU36640.1~1710	289.847	0.46388	0.262642	1.76621	0.0773611	0.134077
ILL.usd-BSU36430.204~314	1.63445	-4.35835	2.71149	-1.60736	0.107975	0.178065
ILL.uvrA-BSU35160.8~2881	10919.5	1.11443	0.182624	6.10235	1.04522e-09	6.81264e-09
ILL.uvrB-BSU35170.79~2064	4560.91	0.793374	0.178635	4.44131	8.94117e-06	3.50528e-05
ILL.uvrC-BSU28490.21~1793	1300.62	-0.645641	0.187518	-3.44308	0.000575125	0.00166927
ILL.uvrX-BSU21500.1~1251	54.8606	1.73414	0.440409	3.93758	8.2309e-05	0.000275206
ILL.uvsE-BSU37200.1~963	19.2967	-0.964913	0.65444	-1.47441	0.140371	0.221559
ILL.uxaA-BSU12390.1~1494	61.5343	0.211039	0.427528	0.493626	0.62157	0.724582
ILL.uxaB-BSU12380.1~1443	41.271	-0.143859	0.471861	-0.304875	0.760461	0.835396
ILL.uxaC-BSU12300.1~1422	132.508	-2.34382	0.417326	-5.61629	1.95102e-08	1.09938e-07
ILL.uxuA-BSU12340.1~1080	13.2784	0.53009	0.787612	0.673035	0.500925	0.617166
ILL.valS-BSU28090.60~2702	6294.5	-2.57616	0.20124	-12.8014	1.61024e-37	6.59401e-36
ILL.veg-BSU00440.40~300	7140.01	-0.81653	0.282856	-2.88673	0.00389266	0.00940973
ILL.vmlR-BSU05610.216~1859	9975.72	4.22612	0.299011	14.1337	2.35591e-45	1.49909e-43
ILL.vpr-BSU38090.26~2446	153.273	1.37257	0.392444	3.4975	0.000469645	0.00138154
ILL.walH-BSU40390.1~1368	3739.48	0.793906	0.200765	3.95441	7.67251e-05	0.000258416
ILL.walK-BSU40400.3~1838	2714.37	0.545417	0.229644	2.37505	0.0175466	0.0368576
ILL.walR-BSU40410.299~1006	1897.59	0.413806	0.192671	2.14773	0.0317349	0.0621476
ILL.wapA-BSU39230.24~7028	145563	-1.23611	0.282095	-4.38188	1.17658e-05	4.54373e-05
ILL.whiA-BSU34750.23~973	7739.28	1.69784	0.284658	5.9645	2.45381e-09	1.51931e-08
ILL.wprA-BSU10770.19~2703	77548.9	-0.341837	0.188468	-1.81377	0.0697135	0.1228
ILL.xepA-BSU12780.1~840	119.526	-1.27253	0.368374	-3.45445	0.00055141	0.00160495
ILL.xerC-BSU16140.1~915	5239.44	0.232457	0.201364	1.15441	0.248331	0.355766
ILL.xerD-BSU23510.7~897	2653.94	1.28105	0.183927	6.965	3.28395e-12	2.71648e-11
ILL.xhlA-BSU12790.1~270	59.7941	-1.1131	0.464974	-2.3939	0.0166703	0.0351957
ILL.xhlB-BSU12800.1~264	49.6474	-0.722254	0.45797	-1.57708	0.114778	0.187415
ILL.xkdA-BSU12500.126~722	523.356	2.45395	0.240688	10.1956	2.07512e-24	3.76434e-23
ILL.xkdB-BSU12520.1~837	34.9611	-1.2724	0.525905	-2.41945	0.0155441	0.0330882
ILL.xkdC-BSU12530.1~801	44.534	-1.26881	0.471104	-2.69327	0.00707548	0.0162308
ILL.xkdD-BSU12540.1~351	14.9698	-0.888762	0.78466	-1.13267	0.257352	0.366911
ILL.xkdE-BSU12590.1~1488	258.72	-1.38567	0.270235	-5.12766	2.93369e-07	1.4172e-06
ILL.xkdF-BSU12600.15~842	223.516	-1.33592	0.30481	-4.38279	1.17167e-05	4.52901e-05
ILL.xkdG-BSU12610.26~961	275.729	-1.28694	0.303298	-4.24314	2.20416e-05	8.16881e-05
ILL.xkdH-BSU12620.1~357	67.858	-1.32258	0.422658	-3.1292	0.00175282	0.00463237
ILL.xkdI-BSU12630.1~486	123.82	-1.23991	0.356679	-3.47626	0.000508464	0.00148623
ILL.xkdJ-BSU12640.1~441	112.211	-1.17276	0.423016	-2.77238	0.0055648	0.0129741
ILL.xkdK-BSU12650.1~1401	424.378	-0.978601	0.295318	-3.31372	0.000920644	0.00256762
ILL.xkdM-BSU12660.2~445	162.723	-1.11631	0.345299	-3.23289	0.00122546	0.00332143
ILL.xkdN-BSU12671.74~520	85.5366	-1.56879	0.391247	-4.00972	6.079e-05	0.00020848
ILL.xkdO-BSU12680.1~3999	782.591	-0.729111	0.267007	-2.73068	0.00632041	0.0145959
ILL.xkdP-BSU12690.1~660	97.7112	-0.770526	0.428733	-1.79722	0.0723015	0.126497
ILL.xkdQ-BSU12700.1~978	125.572	-0.75447	0.346449	-2.17772	0.0294267	0.0583175
ILL.xkdR-BSU12710.1~267	19.9863	-0.556289	0.710709	-0.782724	0.433789	0.554723
ILL.xkdS-BSU12720.57~482	50.3235	-0.732222	0.492469	-1.48684	0.137058	0.217525
ILL.xkdT-BSU12730.1~1047	106.115	-0.50872	0.391349	-1.29992	0.19363	0.289954
ILL.xkdU-BSU12740.1~579	74.5495	-0.672907	0.417887	-1.61026	0.107341	0.177301
ILL.xkdV-BSU12750.1~2064	309.214	-1.17584	0.328148	-3.58327	0.000339323	0.00102217
ILL.xkdW-BSU12760.1~330	42.0468	-1.48273	0.509266	-2.91151	0.00359688	0.00877163
ILL.xkdX-BSU12770.1~165	14.181	-1.74533	0.791164	-2.20603	0.0273819	0.0547373
ILL.xkzA-BSU12749.1~273	40.4823	-0.73095	0.479097	-1.52568	0.127089	0.204291
ILL.xkzB-BSU12672.16~165	14.8561	-1.28045	0.810315	-1.58019	0.114064	0.186618
ILL.xlyA-BSU12810.1~894	266.152	-0.527631	0.325012	-1.62342	0.104499	0.173648
ILL.xlyB-BSU12460.121~1074	75.7635	-1.74793	0.394775	-4.42766	9.52615e-06	3.72051e-05
ILL.xpaC-BSU00250.24~638	643.829	-0.108596	0.249468	-0.435309	0.663338	0.75852
ILL.xpf-BSU12560.1~510	27.7909	-1.82826	0.609011	-3.00202	0.00268193	0.00673904
ILL.xpt-BSU22070.89~673	236.362	-2.95677	0.279305	-10.5862	3.45484e-26	7.21678e-25
ILL.xre-BSU12510.26~367	603.364	-0.071358	0.222762	-0.320332	0.748716	0.827398
ILL.xsa-BSU28510.92~1579	225.475	0.381831	0.327001	1.16767	0.242938	0.349617
ILL.xseA-BSU24300.128~1474	2027.75	0.256358	0.21205	1.20895	0.226681	0.331174
ILL.xseB-BSU24290.1~255	199.999	0.0605302	0.292708	0.206794	0.836171	0.888593
ILL.xtmA-BSU12570.63~860	171.179	-2.00087	0.307836	-6.49979	8.04311e-11	5.89828e-10
ILL.xtmB-BSU12580.1~1302	274.946	-1.59254	0.338911	-4.69901	2.61431e-06	1.10787e-05
ILL.xtrA-BSU12550.1~207	26.1772	-1.16623	0.588204	-1.98269	0.0474019	0.088512
ILL.xylA-BSU17600.66~1403	2163.61	-1.79675	0.233441	-7.69679	1.39531e-14	1.33898e-13
ILL.xylB-BSU17610.1~1500	1082.16	-1.92622	0.210407	-9.15472	5.44977e-20	7.69291e-19
ILL.xylR-BSU17590.110~1162	772.751	-0.18655	0.235803	-0.791129	0.428869	0.550186
ILL.xynA-BSU18840.219~860	3550.3	-1.44242	0.233246	-6.18411	6.24529e-10	4.1797e-09
ILL.xynB-BSU17580.7~1608	286.476	-0.145357	0.299439	-0.485431	0.627371	0.728673
ILL.xynC-BSU18150.1~1269	406.171	0.581304	0.241441	2.40765	0.0160557	0.0341246
ILL.xynD-BSU18160.303~1844	405.815	0.702897	0.234924	2.99201	0.00277144	0.00695129
ILL.xynP-BSU17570.1~1392	166.883	-0.22824	0.343324	-0.664795	0.506181	0.621136
ILL.yaaA-BSU00030.131~346	1454.6	0.609248	0.225645	2.70003	0.00693328	0.01594
ILL.yaaB-BSU00050.9~254	1161.51	0.196042	0.279185	0.702194	0.482558	0.60062
ILL.yaaC-BSU00080.121~1068	16.5426	-0.606976	0.732299	-0.828864	0.407181	0.529425
ILL.yaaD-BSU00110.4~888	11371.1	0.331302	0.177944	1.86183	0.0626266	0.112229
ILL.yaaE-BSU00120.22~612	12080.3	0.24576	0.177055	1.38804	0.165124	0.253885
ILL.yaaH-BSU00160.70~1353	39.9436	-0.599818	0.496301	-1.20858	0.226825	0.331268
ILL.yaaI-BSU00170.1~546	11.8877	-0.679491	0.813437	-0.835334	0.40353	0.525834
ILL.yaaK-BSU00200.24~347	2518.46	-0.393957	0.184278	-2.13784	0.0325297	0.0634936
ILL.yaaL-BSU00220.1~225	426.194	0.179761	0.231653	0.775994	0.437752	0.558293
ILL.yaaN-BSU00260.1~1161	1599.32	0.186745	0.204378	0.913722	0.360863	0.481772
ILL.yaaO-BSU00270.46~1488	3641.69	0.444389	0.210859	2.10752	0.0350725	0.0676586
ILL.yaaQ-BSU00290.33~362	1599.16	0.390991	0.243569	1.60526	0.108437	0.178755
ILL.yaaR-BSU00300.13~453	1633.38	0.574137	0.205071	2.7997	0.00511505	0.0120204
ILL.yaaT-BSU00320.1~828	5087.09	0.24796	0.181787	1.36401	0.172563	0.262881
ILL.yabA-BSU00330.1~360	2196.2	0.0816841	0.196928	0.414791	0.678295	0.770299
ILL.yabB-BSU00340.59~802	2071.39	1.66119	0.189718	8.75607	2.02182e-18	2.54172e-17
ILL.yabC-BSU00360.1~879	3105.58	1.37199	0.198504	6.91164	4.79089e-12	3.92379e-11
ILL.yabD-BSU00390.79~846	2873.01	1.8416	0.186579	9.87034	5.59745e-23	9.44941e-22
ILL.yabE-BSU00400.1~1314	7696.8	0.510867	0.178117	2.86815	0.00412882	0.00992525
ILL.yabG-BSU00430.1~873	183.793	2.05588	0.314202	6.54317	6.02265e-11	4.46807e-10
ILL.yabJ-BSU00480.1~378	4381.89	-0.622185	0.203529	-3.05698	0.0022358	0.00577593
ILL.yabK-BSU00540.60~290	596.507	0.0113703	0.212835	0.0534232	0.957395	0.977001
ILL.yabM-BSU00570.50~1648	1134.43	0.443816	0.207844	2.13533	0.0327338	0.0637715
ILL.yabN-BSU00580.1~1470	3836.72	0.618901	0.189448	3.26686	0.00108746	0.00297665
ILL.yabO-BSU00590.3~263	1097.6	0.751586	0.25313	2.96917	0.00298606	0.00742208
ILL.yabP-BSU00600.79~381	1685.38	0.672615	0.249029	2.70095	0.00691415	0.0159048
ILL.yabQ-BSU00610.1~636	1560.89	0.658483	0.234159	2.81212	0.00492162	0.0116519
ILL.yabR-BSU00630.1~387	10488.3	-1.11433	0.182496	-6.10604	1.02134e-09	6.67342e-09
ILL.yabS-BSU00650.1~738	249.327	0.0565387	0.269162	0.210054	0.833625	0.88705
ILL.yabT-BSU00660.1~1017	184.242	0.102121	0.308721	0.330787	0.740805	0.820685
ILL.yacD-BSU00720.47~940	1618.87	-1.20467	0.226069	-5.32878	9.88755e-08	5.01778e-07
ILL.yacK-BSU00880.4~1086	1472.82	0.999801	0.190636	5.24454	1.5667e-07	7.77898e-07
ILL.yacL-BSU00890.1~1101	1756.37	0.50983	0.199525	2.55522	0.0106121	0.0235596
ILL.yacP-BSU00970.7~519	1338.94	0.437114	0.214692	2.03601	0.0417494	0.0793181
ILL.yajC-BSU27700.20~286	5644.78	-1.28033	0.244379	-5.2391	1.61364e-07	8.00243e-07
ILL.yazA-BSU00350.1~300	501.844	1.33096	0.223192	5.96329	2.47207e-09	1.52604e-08
ILL.yazB-BSU00800.1~210	605.661	0.0294788	0.245152	0.120247	0.904287	0.937183
ILL.ybaC-BSU01140.12~968	1025.3	0.186674	0.286989	0.650457	0.515397	0.630303
ILL.ybaF-BSU01470.1~798	3311.48	1.07652	0.296896	3.62592	0.000287934	0.000881493
ILL.ybaJ-BSU01510.16~783	1460.94	-0.467611	0.21327	-2.19258	0.0283379	0.0564573
ILL.ybaK-BSU01520.1~444	32.0611	1.40132	0.557792	2.51227	0.0119958	0.0262651
ILL.ybaN-BSU01570.75~839	3.85754	0.025417	1.47109	0.0172777	0.986215	0.991773
ILL.ybaR-BSU01580.129~1565	2399.78	-0.508588	0.215145	-2.36393	0.0180821	0.0378672
ILL.ybaS-BSU01590.82~1002	767.84	-0.479005	0.205524	-2.33065	0.0197716	0.0409901
ILL.ybbA-BSU01600.1~753	269.76	-1.33414	0.315151	-4.23332	2.30269e-05	8.49592e-05
ILL.ybbB-BSU01640.12~1601	720.368	-1.47864	0.343329	-4.30676	1.6566e-05	6.28021e-05
ILL.ybbC-BSU01650.14~1258	108.982	-2.24438	0.419439	-5.35092	8.75105e-08	4.49619e-07
ILL.ybbD-BSU01660.1~1929	153.332	-2.01964	0.359318	-5.62076	1.90125e-08	1.07279e-07
ILL.ybbE-BSU01670.33~1358	118.111	-1.7094	0.364572	-4.68878	2.74842e-06	1.15995e-05
ILL.ybbF-BSU01680.25~1392	171.434	-1.0801	0.384851	-2.80655	0.00500753	0.0118079
ILL.ybbH-BSU01690.1~852	272.705	-0.849525	0.353437	-2.40361	0.0162339	0.034468
ILL.ybbJ-BSU01710.1~483	68.6193	-0.625769	0.469066	-1.33407	0.18218	0.274497
ILL.ybbK-BSU01720.17~472	145.53	0.0866662	0.344171	0.251811	0.801187	0.864276
ILL.ybbP-BSU01750.65~886	1600.11	-0.306376	0.186751	-1.64056	0.100888	0.1688
ILL.ybbR-BSU01760.1~1452	5448.78	-0.00734034	0.192068	-0.0382174	0.969514	0.983786
ILL.ybcC-BSU01845.1~2616	290.415	0.126022	0.314466	0.400749	0.688605	0.778899
ILL.ybcF-BSU01860.1~528	76.0426	-0.263738	0.370534	-0.711778	0.476602	0.595716
ILL.ybcH-BSU01870.23~313	40.0191	-0.133684	0.534478	-0.25012	0.802494	0.864578
ILL.ybcI-BSU01880.33~407	149.78	-0.417756	0.306485	-1.36305	0.172866	0.263245
ILL.ybcL-BSU01890.1~1173	248.583	-0.396349	0.245468	-1.61467	0.106383	0.17607
ILL.ybcM-BSU01900.1~315	8.32371	0.131383	0.956572	0.137348	0.890756	0.928938
ILL.ybdG-BSU01990.54~1031	180.301	0.262482	0.270256	0.971236	0.331431	0.449
ILL.ybdJ-BSU02000.2~673	127.139	0.550138	0.302072	1.82121	0.0685747	0.121259
ILL.ybdK-BSU02010.21~983	223.778	0.30912	0.260442	1.18691	0.235265	0.341064
ILL.ybdM-BSU02030.9~779	158.183	-0.519284	0.32145	-1.61544	0.106216	0.175934
ILL.ybdN-BSU02040.3~860	128.141	-0.222428	0.323043	-0.688541	0.491112	0.609008
ILL.ybdO-BSU02050.16~1200	1328.99	1.61281	0.213228	7.56375	3.91624e-14	3.68126e-13
ILL.ybdZ-BSU31959.16~225	154.712	-1.14703	0.469414	-2.44353	0.0145442	0.0311684
ILL.ybeC-BSU02120.30~1649	13048	1.28517	0.178199	7.21201	5.51318e-13	4.75052e-12
ILL.ybeF-BSU02150.174~422	17.4688	-0.224	0.68521	-0.326907	0.743738	0.822707
ILL.ybfA-BSU02160.12~929	116.316	0.782344	0.381775	2.04923	0.0404401	0.0770784
ILL.ybfB-BSU02170.1~1251	259.481	0.985914	0.247651	3.98106	6.86078e-05	0.000233165
ILL.ybfE-BSU02180.124~408	201.024	-3.61442	0.411312	-8.78753	1.52878e-18	1.93958e-17
ILL.ybfF-BSU02190.5~916	447.586	-3.39449	0.303986	-11.1666	5.93996e-29	1.46236e-27
ILL.ybfG-BSU02200.75~2273	667.503	-1.37986	0.226123	-6.10224	1.04594e-09	6.81264e-09
[truncated: 2,237 more rows]

## Sheet: nusG deletion
Transcript	baseMean	log2FoldChange	lfcSE	stat	pvalue	padj
ILL.aadK-BSU26790.74~928	363.721	-0.293293	0.401321	-0.730819	0.46489	0.750841
ILL.aapA-BSU27090.37~1425	1318	-0.390954	0.672702	-0.58117	0.561126	0.811851
ILL.abfA-BSU28720.1~1503	78.7102	0.504468	0.419898	1.20141	0.229594	0.522934
ILL.abh-BSU14480.27~305	1968.21	-1.23788	0.307072	-4.03124	5.54836e-05	0.000848794
ILL.abnA-BSU28810.1~972	82.594	3.37566	0.882318	3.8259	0.000130294	0.00181062
ILL.abnB-BSU39330.134~1543	59.4959	0.0387373	0.581732	0.0665896	0.946908	0.984382
ILL.abrB-BSU00370.67~357	4233.79	0.0701478	0.350674	0.200037	0.841452	0.951981
ILL.accA-BSU29200.1~978	8231.79	-0.350115	0.274151	-1.27709	0.201571	0.492231
ILL.accB-BSU24350.58~537	4316.68	-0.212311	0.266985	-0.795218	0.426487	0.722514
ILL.accC-BSU24340.12~1364	15668.8	-0.117377	0.263995	-0.444617	0.656596	0.875157
ILL.accD-BSU29210.335~1207	8410.81	-0.355568	0.268534	-1.32411	0.185467	0.470515
ILL.acdA-BSU37170.1~1140	278.292	0.815173	0.350986	2.32252	0.0202047	0.111594
ILL.ackA-BSU29470.82~1269	30620.5	-0.806137	0.340259	-2.36919	0.0178272	0.101362
ILL.acoA-BSU08060.1~1002	35.1064	3.75616	0.713143	5.26706	1.38627e-07	5.9157e-06
ILL.acoB-BSU08070.1~1029	57.7896	3.50675	0.624763	5.61293	1.98925e-08	1.28006e-06
ILL.acoC-BSU08080.1~1197	126.479	1.91989	0.454206	4.22691	2.36925e-05	0.000423125
ILL.acoL-BSU08090.21~1397	210.072	2.04726	0.433036	4.72769	2.27084e-06	5.86369e-05
ILL.acoR-BSU08100.1~1818	1503.99	2.04632	0.554102	3.69304	0.000221587	0.00286087
ILL.acpK-BSU17130.1~249	0.717901	-2.9431	3.85312	-0.763822	0.444973	NA
ILL.acpP-BSU15920.3~236	20383.6	0.2745	0.435811	0.629861	0.528786	0.791616
ILL.acpS-BSU04620.42~407	243.836	-0.00997456	0.329927	-0.0302326	0.975882	0.994739
ILL.acsA-BSU29680.16~1734	1570.55	0.0781568	0.368584	0.212046	0.832071	0.949616
ILL.acuA-BSU29690.23~655	783.952	0.149888	0.404038	0.370977	0.710655	0.897854
ILL.acuB-BSU29700.27~671	862.224	0.0487421	0.365623	0.133313	0.893946	0.964623
ILL.acuC-BSU29710.1~1164	1271.13	0.0665444	0.319565	0.208235	0.835046	0.950672
ILL.adaA-BSU01810.111~746	38.6505	-0.0147631	0.825052	-0.0178935	0.985724	0.997795
ILL.adaB-BSU01820.1~540	1033.68	-1.38133	0.52331	-2.63961	0.00830023	0.0581159
ILL.adcA-BSU02850.34~993	1148.36	-0.456911	0.301476	-1.51558	0.129625	0.385831
ILL.adcB-BSU02870.1~843	598.279	0.207318	0.596884	0.347333	0.728341	0.907684
ILL.adcC-BSU02860.56~751	701.922	0.0591802	0.623219	0.0949588	0.924348	0.976322
ILL.addA-BSU10630.1~3699	2517.05	-0.243227	0.341584	-0.712055	0.476431	0.758324
ILL.addB-BSU10620.11~3511	1697.68	0.159918	0.414927	0.385413	0.699931	0.895253
ILL.adeC-BSU14520.13~1746	5913.58	-1.16306	0.461736	-2.51889	0.0117725	0.0755153
ILL.adhA-BSU27010.59~1108	182.242	-0.0632278	0.351534	-0.179863	0.85726	0.956192
ILL.adhB-BSU26970.1~1137	7.38884	-0.230744	1.15801	-0.199259	0.842061	0.951981
ILL.adk-BSU01370.55~708	54806.8	-0.426344	0.30615	-1.3926	0.163741	0.439627
ILL.ahpC-BSU40090.345~908	21493.5	0.17009	0.264869	0.642169	0.520764	0.786512
ILL.ahpF-BSU40100.14~1543	52859.6	0.409222	0.338608	1.20854	0.226838	0.520727
ILL.ahrC-BSU24250.98~547	1113.73	0.523249	0.320674	1.63171	0.10274	0.339395
ILL.alaS-BSU27410.80~2716	12597.2	0.689009	0.285964	2.40943	0.0159776	0.0937365
ILL.alaT-BSU31400.1~1161	4113.6	-0.600637	0.316461	-1.89798	0.0576983	0.237967
ILL.albA-BSU37370.1~1347	677.308	-0.0208029	0.359624	-0.0578464	0.953871	0.98497
ILL.albB-BSU37380.1~162	27.431	-0.0596692	0.624276	-0.0955814	0.923853	0.976322
ILL.albC-BSU37390.1~720	247.953	-0.138865	0.344516	-0.403072	0.686896	0.889631
ILL.albD-BSU37400.1~1311	292.139	-0.162199	0.331463	-0.489344	0.624598	0.857184
ILL.albE-BSU37410.1~1161	128.198	-0.306922	0.370171	-0.829135	0.407028	0.707251
ILL.albF-BSU37420.5~1285	71.6372	-0.822455	0.486284	-1.69131	0.0907784	0.314572
ILL.albG-BSU37430.1~702	23.9783	-0.908353	0.673561	-1.34858	0.177471	0.45962
ILL.ald-BSU31930.15~1151	19566.3	0.510058	0.459282	1.11056	0.26676	0.567687
ILL.aldX-BSU39860.1~1338	244.5	0.116396	0.338301	0.34406	0.730801	0.908794
ILL.aldY-BSU38830.1~1458	44.3851	0.0561072	0.603332	0.0929955	0.925907	0.976643
ILL.alkA-BSU01800.26~937	358.689	-0.056386	0.304174	-0.185374	0.852936	0.955597
ILL.alrA-BSU04640.20~1189	2101.43	-0.610511	0.279703	-2.18271	0.0290573	0.14579
ILL.alrB-BSU17640.457~1641	19.5282	0.0639596	0.846525	0.0755555	0.939773	0.982049
ILL.alsD-BSU36000.62~829	605.084	-0.25129	0.300896	-0.835139	0.403639	0.705325
ILL.alsR-BSU36020.21~929	273.616	-0.0414413	0.337492	-0.122792	0.902272	0.969727
ILL.alsS-BSU36010.2~1714	565.182	0.312883	0.304342	1.02806	0.30392	0.609946
ILL.alsT-BSU18120.45~1442	8538.36	0.0732006	0.420828	0.173944	0.861909	0.956785
ILL.amhX-BSU03010.50~1201	54.5494	-0.723525	0.492173	-1.47006	0.141545	0.403817
ILL.ampS-BSU14450.14~1246	1934.32	-0.205286	0.269789	-0.76091	0.446711	0.741995
ILL.amtB-BSU36510.23~1237	65.5364	-0.575325	0.455476	-1.26313	0.206543	0.496635
ILL.amyC-BSU30290.1~831	30.7384	0.592227	0.615749	0.961799	0.33615	0.646088
ILL.amyD-BSU30280.1~912	29.221	0.518896	0.697703	0.74372	0.457046	0.747644
ILL.amyE-BSU03040.1~1980	1119.68	0.519256	0.359744	1.44341	0.148906	0.418051
ILL.amyX-BSU29930.6~2162	1470.9	-0.486946	0.278404	-1.74906	0.0802803	0.291628
ILL.ansA-BSU23580.146~1135	7290.85	-2.94652	0.525612	-5.60589	2.07187e-08	1.3124e-06
ILL.ansR-BSU23590.29~379	547.928	-1.64183	0.406343	-4.0405	5.33374e-05	0.000825304
ILL.ansZ-BSU02690.15~1142	60.142	-0.831856	0.495025	-1.68043	0.0928732	0.318804
ILL.antE-BSU25220.1~297	14.343	0.820328	0.908136	0.903309	0.366362	0.672354
ILL.appB-BSU11390.87~1037	61.3696	-1.05952	0.514569	-2.05905	0.0394894	0.179877
ILL.appC-BSU11400.1~912	59.5967	-0.640279	0.503602	-1.2714	0.203587	0.494675
ILL.appD-BSU11360.1~987	20.3943	-1.48234	0.820687	-1.80622	0.0708833	0.271351
ILL.appF-BSU11370.1~990	168.42	-1.4961	0.43256	-3.4587	0.000542781	0.00614647
ILL.aprE-BSU10300.27~1172	58.1577	-0.911842	0.607933	-1.49991	0.133639	0.391263
ILL.aprX-BSU17260.30~1358	21.3837	-0.0789297	0.683063	-0.115553	0.908007	0.971384
ILL.apt-BSU27610.6~518	4486.85	0.172073	0.285115	0.603524	0.54616	0.801674
ILL.araA-BSU28800.1~1491	241.372	1.20248	0.529989	2.26888	0.0232758	0.123832
ILL.araB-BSU28790.1~1683	196.692	1.30042	0.527858	2.46359	0.0137554	0.0833547
ILL.araD-BSU28780.1~690	65.7633	1.42252	0.660076	2.15508	0.0311553	0.153281
ILL.araE-BSU33960.1~1395	118.971	0.416835	0.537091	0.776097	0.437691	0.731712
ILL.araL-BSU28770.1~819	62.1924	0.996227	0.524367	1.89987	0.0574507	0.237416
ILL.araM-BSU28760.1~1185	67.702	0.903333	0.489494	1.84544	0.0649731	0.257228
ILL.araN-BSU28750.1~1302	64.081	0.533702	0.4981	1.07148	0.283956	0.588155
ILL.araP-BSU28740.1~942	23.8554	0.674851	0.658585	1.0247	0.305505	0.611916
ILL.araQ-BSU28730.1~846	18.4824	0.957869	0.747533	1.28137	0.200063	0.489767
ILL.araR-BSU33970.1~1155	1423.16	0.63214	0.290525	2.17585	0.0295664	0.147613
ILL.arfM-BSU37290.1~477	2.80447	-2.38888	2.04012	-1.17095	0.241618	0.536135
ILL.argB-BSU11210.15~791	7.49473	0.60925	1.13035	0.538994	0.589891	0.833537
ILL.argC-BSU11190.19~1056	39.5045	0.250868	0.663181	0.37828	0.705223	0.895949
ILL.argD-BSU11220.1~1158	9.51095	-0.413681	1.06166	-0.389654	0.696793	0.895253
ILL.argF-BSU11250.1~960	58.1448	-0.365977	0.490352	-0.746356	0.455453	0.746324
ILL.argG-BSU29450.14~1225	343.349	0.509607	0.400828	1.27139	0.203591	0.494675
ILL.argH-BSU29440.1~1386	438.782	0.5449	0.338033	1.61197	0.106968	0.347475
ILL.argI-BSU40320.54~944	1268.25	-0.629324	0.356685	-1.76437	0.0776703	0.285613
ILL.argJ-BSU11200.20~1240	23.5279	-1.12671	0.679217	-1.65883	0.09715	0.327659
ILL.argS-BSU37330.1~1671	10868.9	0.169993	0.280753	0.605489	0.544854	0.80148
ILL.aroA-BSU29750.140~1216	10691.8	-0.695828	0.27866	-2.49705	0.012523	0.0784773
ILL.aroB-BSU22700.1~1089	2896.13	0.33295	0.315361	1.05577	0.291072	0.59536
ILL.aroD-BSU23080.86~853	1456.93	0.743745	0.350921	2.11941	0.0340561	0.161637
ILL.aroE-BSU22600.1~1287	4675.5	-0.227364	0.291168	-0.780868	0.43488	0.729322
ILL.aroE-BSU25660.18~860	3743.78	-0.154567	0.396979	-0.389357	0.697012	0.895253
ILL.aroF-BSU22710.3~1175	3247.82	0.482426	0.300311	1.60642	0.108181	0.349176
ILL.aroH-BSU22690.1~384	1183.55	-0.0738657	0.287894	-0.256573	0.797509	0.935894
ILL.aroK-BSU03150.117~677	723.551	-0.0550466	0.311865	-0.176508	0.859895	0.956383
ILL.arsB-BSU25790.23~1063	225.762	-0.312587	0.423651	-0.73784	0.460612	0.747963
ILL.arsC-BSU25780.12~431	152.228	-0.269617	0.372199	-0.72439	0.468826	0.752423
ILL.arsR-BSU25810.11~328	89.5016	-0.437966	0.432184	-1.01338	0.310879	0.616699
ILL.artP-BSU23980.38~805	598.491	-0.435482	0.33655	-1.29396	0.19568	0.484007
ILL.artQ-BSU23970.70~729	248.639	0.290271	0.340372	0.852806	0.393767	0.696175
ILL.artR-BSU23960.1~723	444.223	0.0575937	0.319958	0.180004	0.857149	0.956192
ILL.asd-BSU16750.57~1097	9377.51	-0.296455	0.294786	-1.00566	0.314579	0.619982
ILL.aseR-BSU05330.44~379	81.711	0.20311	0.423737	0.47933	0.631704	0.862245
ILL.aslA-BSU39900.1~270	2.12876	-1.37397	2.40218	-0.571967	0.567344	0.817472
ILL.asnB-BSU30540.150~2048	24181.2	0.044251	0.356568	0.124102	0.901234	0.969383
ILL.asnC-BSU22360.1~1293	25734.2	0.285502	0.270772	1.0544	0.2917	0.596043
ILL.asnH-BSU39920.1~2244	184.536	0.0652638	0.371832	0.17552	0.860671	0.956514
ILL.asnO-BSU10790.1~1845	122.773	1.93565	0.662807	2.92038	0.003496	0.0288651
ILL.aspA-BSU23570.45~1472	11679	-2.6409	0.527523	-5.00622	5.55093e-07	1.8148e-05
ILL.aspB-BSU22370.23~1204	17077.1	-0.0229939	0.270865	-0.0848904	0.932349	0.979528
ILL.aspS-BSU27550.1~1779	5584.82	-0.117673	0.321855	-0.36561	0.714656	0.900315
ILL.atpA-BSU36830.17~1525	49003	-0.0355758	0.312715	-0.113764	0.909425	0.972031
ILL.atpB-BSU36870.1~735	26725	-0.10537	0.272672	-0.386435	0.699174	0.895253
ILL.atpC-BSU36800.24~422	14265	0.278473	0.38656	0.720387	0.471287	0.754282
ILL.atpD-BSU36810.26~1447	50206	0.0497845	0.351522	0.141626	0.887376	0.963071
ILL.atpE-BSU36860.46~258	9540.39	-0.153793	0.305122	-0.504039	0.614234	0.849575
ILL.atpF-BSU36850.4~516	15349.2	-0.321221	0.269849	-1.19037	0.2339	0.526745
ILL.atpG-BSU36820.1~864	24090.4	-0.171419	0.29738	-0.576432	0.564323	0.814732
ILL.atpH-BSU36840.1~546	14680.1	-0.333256	0.268507	-1.24114	0.214552	0.507124
ILL.atpI-BSU36880.271~654	7148.99	0.0382382	0.364783	0.104825	0.916515	0.97497
ILL.azlB-BSU26720.1~474	125.086	-0.45201	0.414292	-1.09104	0.275255	0.579144
ILL.azlC-BSU26710.1~765	176.183	-0.518341	0.345703	-1.49938	0.133774	0.391263
ILL.azlD-BSU26700.1~333	84.9301	-0.11267	0.416913	-0.270248	0.78697	0.933562
ILL.bacA-BSU37740.5~619	19.8341	-1.18221	1.05066	-1.12521	0.260501	0.559896
ILL.bacB-BSU37730.1~708	49.9966	-0.406177	0.553645	-0.733641	0.463168	0.749783
ILL.bacC-BSU37720.1~768	60.8621	-1.15408	0.581029	-1.98627	0.0470037	0.205086
ILL.bacD-BSU37710.1~1419	180.928	-0.876393	0.393382	-2.22784	0.0258909	0.134222
ILL.bacE-BSU37700.1~1185	156.268	-1.01725	0.391926	-2.59551	0.00944513	0.0638176
ILL.bcd-BSU24080.12~1106	2837.27	0.999577	0.546173	1.83015	0.0672279	0.262818
ILL.bceA-BSU30380.102~863	77.6543	-0.212175	0.563991	-0.376203	0.706766	0.89612
ILL.bceB-BSU30370.1~1941	179.839	-0.181819	0.436427	-0.416609	0.676964	0.884458
ILL.bceR-BSU30400.61~756	258.464	-0.193602	0.333465	-0.580575	0.561527	0.811851
ILL.bceS-BSU30390.1~1005	444.318	-0.446838	0.296897	-1.50503	0.132317	0.390118
ILL.bcrC-BSU36530.9~590	941.163	-1.11898	0.519416	-2.15431	0.0312161	0.153394
ILL.bcsA-BSU22050.74~1171	50.2084	3.01278	0.643194	4.6841	2.81199e-06	7.16968e-05
ILL.bdbA-BSU21460.1~414	85.1188	-4.68054	0.624711	-7.49232	6.76684e-14	1.52404e-11
ILL.bdbB-BSU21440.1~447	121.613	-3.33115	0.756881	-4.40115	1.07679e-05	0.000212941
ILL.bdbC-BSU33470.5~421	2694.91	-0.174671	0.267811	-0.652216	0.514262	0.781709
ILL.bdbD-BSU33480.1~669	4282.3	-0.351355	0.282871	-1.2421	0.214198	0.507124
ILL.bdhA-BSU06240.263~1303	18069.3	-0.12762	0.343304	-0.371739	0.710087	0.897854
ILL.besA-BSU32010.59~928	1555.21	0.0772261	0.427659	0.180579	0.856698	0.956192
ILL.bglA-BSU40110.14~1453	1395.52	0.831456	0.384202	2.16411	0.030456	0.150953
ILL.bglC-BSU03410.1~1434	147.207	0.200856	0.358597	0.560115	0.575401	0.823012
ILL.bglH-BSU39260.23~1432	5232	0.388275	0.383857	1.01151	0.311773	0.616896
ILL.bglP-BSU39270.2~1831	6019.17	0.608424	0.384811	1.5811	0.113855	0.35905
ILL.bglS-BSU39070.93~821	320.756	0.599264	0.386441	1.55072	0.120968	0.37043
ILL.bhlA-BSU21420.1~213	0.723346	-1.07454	3.99111	-0.269233	0.78775	NA
ILL.bhlB-BSU21430.1~267	2.2555	-0.146331	2.18836	-0.0668677	0.946687	0.984382
ILL.bioA-BSU30230.1~1347	24.7112	-0.51401	0.638993	-0.804406	0.421163	0.718298
ILL.bioB-BSU30200.1~1008	16.3046	-0.920587	0.772474	-1.19174	0.233364	0.526465
ILL.bioD-BSU30210.1~696	11.5565	-0.900235	0.89078	-1.01061	0.312201	0.616896
ILL.bioF-BSU30220.1~1170	20.6962	-0.0947633	0.694588	-0.136431	0.891481	0.96437
ILL.bioI-BSU30190.69~1256	26.5194	-0.166988	0.626558	-0.266516	0.789842	0.934342
ILL.bioW-BSU30240.21~797	15.1741	-0.764567	0.843271	-0.906669	0.364582	0.670443
ILL.bioY-BSU10370.12~572	7.495	-0.824606	1.10177	-0.748436	0.454197	0.746324
ILL.bioYB-BSU32030.6~608	184.119	-0.133854	0.354685	-0.377389	0.705885	0.89612
ILL.bipA-BSU14770.10~1848	26186.8	-0.372267	0.464008	-0.802286	0.422387	0.719478
ILL.birA-BSU22440.1~978	1792.71	0.0802564	0.290753	0.27603	0.782525	0.932012
ILL.bkdAA-BSU24050.22~1014	2481.1	0.460998	0.386243	1.19354	0.232656	0.525868
ILL.bkdAB-BSU24040.14~997	2730.21	0.40461	0.356275	1.13567	0.256097	0.557059
ILL.bkdB-BSU24030.1~1275	4132.71	0.405406	0.322875	1.25561	0.209256	0.499913
ILL.bkdR-BSU24100.50~2128	3338.14	1.3061	0.556237	2.34809	0.0188697	0.105975
ILL.blt-BSU26590.10~1212	47.6897	0.282622	0.606924	0.465663	0.641456	0.869139
ILL.bltD-BSU26600.1~459	28.4154	0.0846735	0.63959	0.132387	0.894678	0.964623
ILL.bltR-BSU26580.4~825	80.311	-0.627548	0.609501	-1.02961	0.303194	0.609416
ILL.blyA-BSU21410.1~1104	0.440697	0.0109042	4.73128	0.0023047	0.998161	NA
ILL.bmr-BSU24010.1~1170	494.277	0.161341	0.29483	0.547234	0.584218	0.830265
ILL.bmrA-BSU34820.53~1822	2406.66	0.0143006	0.296694	0.0482	0.961557	0.989053
ILL.bmrR-BSU24020.4~840	139.083	-0.16826	0.385439	-0.436542	0.662444	0.87677
ILL.bmrU-BSU24000.12~905	3.50035	1.92117	1.70962	1.12374	0.261123	0.560051
ILL.bofA-BSU00230.66~329	122.587	0.905169	0.583287	1.55184	0.1207	0.370415
ILL.bofC-BSU27750.48~560	168.171	1.10133	0.390993	2.81674	0.0048514	0.0374621
ILL.bpr-BSU15300.63~4364	203.34	0.197644	0.336331	0.587647	0.556769	0.807853
ILL.braB-BSU29600.88~1425	1720.33	-0.993236	0.48854	-2.03307	0.0420455	0.188345
ILL.brnQ-BSU26690.165~1487	421.441	-0.458064	0.356391	-1.28529	0.198692	0.488518
ILL.bsaA-BSU21900.124~606	110.45	-0.16477	0.395805	-0.41629	0.677198	0.884458
ILL.bscR-BSU27170.172~756	183.565	0.00193009	0.47134	0.00409489	0.996733	0.998746
ILL.bsdD-BSU03651.1~228	15.1232	-0.330188	0.817499	-0.4039	0.686286	0.889631
ILL.bsn-BSU32540.14~880	246.204	0.756367	0.375918	2.01205	0.0442143	0.195469
ILL.BSU-misc-RNA-1-extra.1~213	3335.4	0.852992	0.664754	1.28317	0.199433	0.489244
ILL.BSU-misc-RNA-10-extra.1~103	36.1454	2.41128	1.35329	1.78179	0.0747838	0.278861
ILL.BSU-misc-RNA-11-extra.1~108	7.62224	0.675601	1.38465	0.48792	0.625606	0.857693
ILL.BSU-misc-RNA-12-extra.1~118	77.4656	1.2013	1.27134	0.944915	0.344702	0.653918
ILL.BSU-misc-RNA-13-extra.1~215	1427.56	-0.636781	0.387488	-1.64336	0.100309	0.333871
ILL.BSU-misc-RNA-14-extra.1~109	20.7928	-0.0829315	1.02091	-0.0812332	0.935257	0.98023
ILL.BSU-misc-RNA-15-extra.1~121	3.40837	-0.331618	2.16271	-0.153334	0.878135	0.962268
ILL.BSU-misc-RNA-16-extra.1~112	151.065	1.63039	0.776263	2.10031	0.035702	0.167712
ILL.BSU-misc-RNA-17-extra.1~211	3005.32	1.18747	0.671187	1.7692	0.07686	0.284534
ILL.BSU-misc-RNA-18-extra.1~156	297.939	0.776563	0.848785	0.914912	0.360238	0.667003
ILL.BSU-misc-RNA-19-extra.1~113	194.592	2.70319	1.13656	2.37839	0.0173884	0.099612
ILL.BSU-misc-RNA-20-extra.1~157	179.632	-0.653515	0.750193	-0.871129	0.383684	0.687736
ILL.BSU-misc-RNA-21-extra.1~101	2.45971	4.76776	3.37752	1.41161	0.158064	0.43143
ILL.BSU-misc-RNA-22-extra.1~45	0	NA	NA	NA	NA	NA
ILL.BSU-misc-RNA-23-extra.1~121	0.907403	-0.143657	3.02569	-0.0474792	0.962131	NA
ILL.BSU-misc-RNA-24-extra.1~102	8.88222	2.30351	1.45117	1.58735	0.112434	0.356658
ILL.BSU-misc-RNA-25-extra.1~227	3236.81	-0.00488127	0.274607	-0.0177755	0.985818	0.997795
ILL.BSU-misc-RNA-26-extra.1~117	200.552	0.890765	0.865413	1.02929	0.303341	0.609416
ILL.BSU-misc-RNA-27-extra.1~118	70.9688	-0.474122	0.792695	-0.598114	0.549764	0.80217
ILL.BSU-misc-RNA-28-extra.1~115	117.661	-0.551088	0.965485	-0.570789	0.568143	0.81797
ILL.BSU-misc-RNA-29-extra.1~106	8.1245	0.831436	1.76717	0.470489	0.638005	0.865099
ILL.BSU-misc-RNA-3-extra.1~141	3918.02	-0.255654	0.297221	-0.86015	0.389706	0.69254
ILL.BSU-misc-RNA-30-extra.1~42	1.90663	2.71767	2.48998	1.09144	0.275077	NA
ILL.BSU-misc-RNA-31-extra.1~92	0	NA	NA	NA	NA	NA
ILL.BSU-misc-RNA-32-extra.1~187	90098.7	2.83357	0.948637	2.98699	0.00281739	0.0244053
ILL.BSU-misc-RNA-34-extra.1~101	1.26144	-0.533773	2.38733	-0.223586	0.82308	NA
ILL.BSU-misc-RNA-36-extra.1~145	1128.69	1.10401	0.801202	1.37794	0.168222	0.445845
ILL.BSU-misc-RNA-37-extra.1~98	14.2948	1.08359	1.23281	0.878954	0.379426	0.685045
ILL.BSU-misc-RNA-38-extra.1~102	7.17758	-0.0872332	1.14383	-0.0762642	0.939209	0.98189
ILL.BSU-misc-RNA-39-extra.1~175	2066.22	-0.393352	0.387344	-1.01551	0.309862	0.616682
ILL.BSU-misc-RNA-4-extra.1~57	1.26569	2.09655	2.75021	0.762322	0.445868	NA
ILL.BSU-misc-RNA-40-extra.1~208	1963.3	1.14253	0.618968	1.84586	0.0649131	0.257228
ILL.BSU-misc-RNA-41-extra.1~193	14688.9	1.39697	0.925961	1.50867	0.131383	0.388494
ILL.BSU-misc-RNA-42-extra.1~233	3853.85	0.18841	0.286371	0.657922	0.510589	0.778753
ILL.BSU-misc-RNA-43-extra.1~76	17.5151	-0.674042	0.749598	-0.899204	0.368544	0.674527
ILL.BSU-misc-RNA-44-extra.1~223	3396.93	0.480381	0.546561	0.878916	0.379447	0.685045
ILL.BSU-misc-RNA-45-extra.1~247	78.6469	-1.4693	0.605329	-2.42727	0.015213	0.0899029
ILL.BSU-misc-RNA-46-extra.1~180	1924.86	0.73082	0.568066	1.2865	0.198267	0.488387
ILL.BSU-misc-RNA-47-extra.1~131	592.85	1.06541	0.719624	1.48051	0.138738	0.398474
ILL.BSU-misc-RNA-48-extra.1~248	1541.3	0.0853136	0.324781	0.26268	0.792797	0.935441
ILL.BSU-misc-RNA-49-extra.1~215	4529.94	0.773773	0.595082	1.30028	0.193506	0.479824
ILL.BSU-misc-RNA-5-extra.1~171	850.377	0.475424	0.482448	0.98544	0.324408	0.631676
ILL.BSU-misc-RNA-50-extra.1~139	2585.54	0.67746	0.453699	1.49319	0.135387	0.392516
ILL.BSU-misc-RNA-51-extra.1~102	6.86837	2.51174	2.33154	1.07729	0.281352	0.585285
ILL.BSU-misc-RNA-52-extra.1~149	291.87	-0.780215	0.535416	-1.45721	0.145057	0.410658
ILL.BSU-misc-RNA-53-extra.1~107	35.5722	1.98578	1.10599	1.79547	0.0725788	0.274217
ILL.BSU-misc-RNA-54-extra.1~180	520.207	0.0390289	0.411445	0.0948581	0.924428	0.976322
ILL.BSU-misc-RNA-56-extra.1~236	262.906	-1.60013	0.515359	-3.10488	0.00190354	0.0173805
ILL.BSU-misc-RNA-57-extra.1~222	78.6371	0.10775	0.495887	0.217287	0.827985	0.948207
ILL.BSU-misc-RNA-58-extra.1~222	376.159	-0.148521	0.49086	-0.302574	0.762214	0.91942
ILL.BSU-misc-RNA-59-extra.1~207	65.4657	0.114776	0.465869	0.246369	0.805396	0.937432
ILL.BSU-misc-RNA-6-extra.1~248	559.356	-0.28009	0.333168	-0.840685	0.400524	0.702726
ILL.BSU-misc-RNA-60-extra.1~103	223.942	0.852991	0.786055	1.08515	0.277853	0.581827
ILL.BSU-misc-RNA-61-extra.1~107	1.40966	0.87473	2.74186	0.319028	0.749705	NA
ILL.BSU-misc-RNA-62-extra.1~107	0.820743	-0.833241	3.86408	-0.215638	0.82927	NA
ILL.BSU-misc-RNA-63-extra.1~103	6.0495	-1.04487	1.21507	-0.859923	0.389831	0.69254
ILL.BSU-misc-RNA-7-extra.1~144	1311.16	-1.32492	0.535298	-2.4751	0.01332	0.0817899
ILL.BSU-misc-RNA-8-extra.1~101	108.425	0.778281	0.84881	0.916908	0.359191	0.666257
ILL.BSU-misc-RNA-9-extra.1~103	11.7954	0.490358	0.924593	0.530351	0.595869	0.837309
ILL.buk-BSU24070.4~1095	2096.95	0.706067	0.479479	1.47257	0.140866	0.402163
ILL.cah-BSU03180.1~957	473.904	-0.754709	0.349927	-2.15676	0.0310243	0.153008
ILL.carA-BSU11230.1~1062	4.93747	-1.14425	1.32251	-0.865206	0.386926	0.689796
ILL.carB-BSU11240.1~3093	47.2638	-0.1876	0.522832	-0.358815	0.719734	0.903064
ILL.carB-BSU15520.1~3216	16183.1	1.37031	0.823285	1.66444	0.0960251	0.32549
ILL.catD-BSU08230.21~425	162.305	0.0108948	0.456914	0.0238442	0.980977	0.997635
ILL.catE-BSU08240.1~858	518.821	0.515667	0.355353	1.45114	0.146741	0.413691
ILL.cbiO-BSU01450.128~973	3425.72	1.14687	0.404864	2.83274	0.00461507	0.0361188
ILL.cbiO-BSU01460.15~845	3183.16	1.25963	0.431652	2.91816	0.00352109	0.0289543
ILL.cca-BSU22450.5~1198	1944.04	0.0695487	0.288744	0.240866	0.809659	0.940051
ILL.cccA-BSU25190.32~394	600.972	2.36474	0.534365	4.42533	9.62967e-06	0.000194222
ILL.cccB-BSU35270.8~346	1969.46	0.347115	0.299661	1.15836	0.246718	0.544287
ILL.ccdA-BSU17930.86~793	1523.54	3.52531	0.467921	7.53398	4.92157e-14	1.247e-11
ILL.ccpA-BSU29740.151~1155	7944.01	0.178949	0.282642	0.633131	0.526648	0.79046
ILL.ccpB-BSU40870.44~979	213.317	2.01206	0.625663	3.21588	0.00130045	0.0125824
ILL.ccpC-BSU14140.25~906	3286.05	1.20129	0.270515	4.44077	8.96361e-06	0.000183528
ILL.ccpN-BSU25250.133~771	1851.12	-0.186535	0.334837	-0.55709	0.577466	0.823362
ILL.cdd-BSU25300.1~411	1667.12	0.429329	0.2971	1.44507	0.148439	0.417577
ILL.cdoA-BSU31140.338~823	11.3272	-2.74219	1.04221	-2.63113	0.00851006	0.059278
ILL.cdsA-BSU16540.1~810	3760.77	1.05625	0.324633	3.25368	0.00113919	0.0113751
ILL.cgeA-BSU19780.15~416	2.0757	0.943261	1.99827	0.47204	0.636899	NA
ILL.cgeB-BSU19790.7~960	14.0762	-0.791385	0.883563	-0.895675	0.370426	0.67644
ILL.cgeC-BSU19770.1~306	0.25664	-1.43533	4.98826	-0.287742	0.773544	NA
ILL.cgeD-BSU19760.1~1281	51.3427	-1.93988	0.591986	-3.2769	0.00104953	0.0106105
ILL.cgeE-BSU19750.4~783	79.1397	-1.78038	0.476477	-3.73656	0.000186558	0.00245554
ILL.cggR-BSU33950.100~1122	9715.25	-0.0872915	0.478928	-0.182264	0.855375	0.956192
ILL.cheA-BSU16430.1~2019	2921.88	-1.4742	0.276469	-5.33223	9.70119e-08	4.54789e-06
ILL.cheB-BSU16420.2~1075	1436.25	-1.60536	0.292074	-5.49639	3.87636e-08	2.21335e-06
ILL.cheC-BSU16450.10~639	893.641	-1.35555	0.308479	-4.3943	1.11132e-05	0.000218704
ILL.cheD-BSU16460.1~501	766.922	-1.24996	0.312811	-3.99588	6.44547e-05	0.000964204
ILL.cheR-BSU22720.25~795	615.812	0.659028	0.296677	2.22137	0.0263262	0.13544
ILL.cheV-BSU14010.162~1073	1262.18	-1.55963	0.344504	-4.52717	5.97776e-06	0.000128342
ILL.cheW-BSU16440.22~492	832.139	-1.38697	0.296436	-4.6788	2.88559e-06	7.31138e-05
ILL.cheY-BSU16330.26~388	1027.93	-1.27947	0.286021	-4.47333	7.70096e-06	0.000160926
ILL.cimH-BSU38770.19~1371	82.6902	0.641019	0.91113	0.703543	0.481717	0.761389
ILL.cinA-BSU16930.1~1251	4769.11	0.172539	0.26872	0.642076	0.520824	0.786512
ILL.citA-BSU09440.12~1112	467.66	0.180533	0.294524	0.612965	0.539899	0.799552
ILL.citB-BSU18000.43~2772	15375	-0.084857	0.544239	-0.155919	0.876097	0.961937
ILL.citH-BSU39060.1~1281	29.8035	-0.563812	0.592848	-0.951023	0.341593	0.651016
ILL.citM-BSU07610.40~1341	285.793	0.982048	0.401652	2.44502	0.0144845	0.0868639
ILL.citR-BSU09430.36~911	269.106	-0.014153	0.363889	-0.0388937	0.968975	0.992006
ILL.citS-BSU07580.4~1632	321.238	0.20974	0.433781	0.483517	0.628729	0.861104
ILL.citT-BSU07590.1~681	120.967	-0.268608	0.461432	-0.582119	0.560487	0.811505
ILL.citZ-BSU29140.186~1304	10161.2	-0.115988	0.493157	-0.235196	0.814057	0.942691
ILL.clpC-BSU00860.1~2433	9232.5	0.76642	0.41004	1.86913	0.0616043	0.249716
ILL.clpE-BSU13700.33~2132	534.754	-0.765112	0.341223	-2.24226	0.0249445	0.131161
ILL.clpP-BSU34540.42~635	8266.01	-0.333427	0.280838	-1.18726	0.235126	0.527835
ILL.clpQ-BSU16150.1~546	3047.74	0.0653875	0.307429	0.212692	0.831567	0.949616
ILL.clpX-BSU28220.1~1263	25025.8	0.412427	0.294692	1.39952	0.161657	0.437197
ILL.clsA-BSU36590.243~1691	2254.55	0.590839	0.271454	2.17657	0.0295127	0.147527
ILL.clsB-BSU37190.1~1197	7.39216	-1.04925	1.16449	-0.901037	0.367568	0.673591
ILL.cmk-BSU22890.1~675	4053.44	-0.267199	0.299697	-0.891566	0.372626	0.678018
ILL.coaA-BSU23760.1~960	784.291	0.0798566	0.297138	0.268753	0.78812	0.933562
ILL.coaBC-BSU15700.78~1298	1608.29	1.03136	0.301603	3.4196	0.000627125	0.00692743
ILL.coaD-BSU15020.5~490	1427.3	-0.130109	0.342014	-0.380421	0.703633	0.895332
ILL.coaE-BSU29060.16~609	941.323	0.0559149	0.280802	0.199126	0.842164	0.951981
ILL.coaX-BSU00700.195~971	2817.25	0.237279	0.313881	0.75595	0.449679	0.742893
ILL.codY-BSU16170.1~780	5989.11	0.147025	0.283823	0.518017	0.604446	0.844716
ILL.coiA-BSU11530.57~1178	42.0445	1.25641	0.542395	2.31641	0.0205356	0.112807
ILL.comA-BSU31680.3~647	1956.45	0.245031	0.283027	0.865751	0.386627	0.689789
ILL.comC-BSU28070.21~767	31.3055	1.16826	0.773047	1.51124	0.130727	0.387402
ILL.comEA-BSU25590.1~618	22.2296	3.02218	1.03523	2.91934	0.00350774	0.0289032
ILL.comEB-BSU25580.10~579	430.967	0.0217409	0.335671	0.0647685	0.948358	0.9847
ILL.comEC-BSU25570.4~2334	166.775	0.220444	0.491155	0.448827	0.653556	0.875074
ILL.comER-BSU25600.84~905	7.53613	-1.21604	1.131	-1.07519	0.282288	0.586569
ILL.comFA-BSU35470.7~1398	143.877	0.74272	0.579043	1.28267	0.199608	0.489244
ILL.comFB-BSU35460.60~356	98.746	-0.0407509	0.422123	-0.0965381	0.923093	0.976322
ILL.comFC-BSU35450.1~690	310.041	-0.158191	0.396321	-0.399149	0.689783	0.89115
ILL.comGA-BSU24730.2~1072	11.6276	0.0646358	0.975179	0.066281	0.947154	0.984382
ILL.comGB-BSU24720.1~972	5.35216	-1.03441	1.2874	-0.803484	0.421695	0.718903
ILL.comGC-BSU24710.1~297	3.51694	-0.271332	1.5879	-0.170874	0.864323	0.957367
ILL.comGD-BSU24700.1~432	2.21967	0.355635	1.8256	0.194804	0.845546	0.952179
ILL.comGE-BSU24690.1~348	2.39403	-1.18572	1.85912	-0.637782	0.523616	0.788981
ILL.comGF-BSU24680.26~409	5.82872	0.253655	1.32254	0.191794	0.847904	0.952857
ILL.comGG-BSU24670.1~375	13.9476	-1.09373	0.916731	-1.19308	0.23284	0.525868
ILL.comK-BSU10420.20~598	155.368	-1.76797	0.428436	-4.12657	3.68217e-05	0.000609287
ILL.comN-BSU27660.1~297	1229.25	0.170014	0.281737	0.603449	0.54621	0.801674
ILL.comP-BSU31690.1~2310	4493.9	-0.628669	0.353759	-1.77711	0.0755499	0.280733
ILL.comQ-BSU31710.106~1005	748.368	-0.68236	0.358744	-1.90208	0.0571607	0.2367
ILL.comS-BSU03500.1~141	0	NA	NA	NA	NA	NA
ILL.comX-BSU31700.1~168	141.879	-1.42297	0.428179	-3.3233	0.00088959	0.00924717
ILL.comZ-BSU11310.15~206	725.621	0.219322	0.284726	0.770291	0.441127	0.73559
ILL.copA-BSU33500.84~2492	1493.75	0.207876	0.284834	0.729816	0.465502	0.750954
ILL.copB-BSU33490.70~2169	1669.42	0.749857	0.406992	1.84244	0.0654112	0.258258
ILL.copZ-BSU33510.13~222	261.868	1.07891	0.590277	1.8278	0.0675797	0.263851
ILL.cotA-BSU06300.152~1693	15.0054	-0.617451	0.953238	-0.647741	0.517152	0.785274
ILL.cotB-BSU36050.1~1143	38.697	-1.31181	0.57804	-2.26942	0.0232429	0.123819
ILL.cotC-BSU17700.175~375	89.2415	1.23188	0.728977	1.68987	0.0910531	0.314572
ILL.cotD-BSU22200.11~238	1698.05	-0.407537	0.284621	-1.43186	0.152184	0.424024
ILL.cotE-BSU17030.26~571	29.6984	-0.401893	0.601935	-0.667669	0.504345	0.775356
ILL.cotF-BSU40530.26~508	9.05303	-0.0399953	0.978868	-0.0408588	0.967408	0.992006
ILL.cotG-BSU36070.141~728	0.420133	2.25975	4.91378	0.459879	0.645603	NA
ILL.cotH-BSU36060.1~1089	12.7386	-0.283436	0.906138	-0.312796	0.754436	0.917182
ILL.cotI-BSU30920.1~1074	5.47557	-0.990137	1.27856	-0.774417	0.438684	0.733032
ILL.cotJA-BSU06890.1~249	2.48056	1.28481	1.80788	0.710675	0.477286	0.75879
ILL.cotJB-BSU06900.1~264	1.65556	0.402664	2.11911	0.190016	0.849297	NA
ILL.cotJC-BSU06910.1~570	9.78169	0.550812	1.01692	0.541647	0.588062	0.832619
ILL.cotM-BSU17970.42~434	7.61751	0.158494	1.24349	0.127459	0.898577	0.967294
ILL.cotO-BSU11730.18~701	459.097	3.5224	0.584089	6.03058	1.63369e-09	1.54023e-07
ILL.cotP-BSU05550.1~432	2.21967	0.355635	1.8256	0.194804	0.845546	0.952179
ILL.cotR-BSU34530.305~1267	34.0261	-1.29608	0.751289	-1.72515	0.084501	0.299709
ILL.cotS-BSU30900.1~1056	32.2178	0.898764	0.684853	1.31235	0.189403	0.476748
ILL.cotSA-BSU30910.1~1134	31.1908	1.28228	0.876939	1.46222	0.14368	0.407972
ILL.cotT-BSU12090.28~351	2.58778	0.844997	2.10083	0.402221	0.687521	0.889631
ILL.cotU-BSU17670.192~452	13.0555	-1.14888	1.05574	-1.08822	0.276498	0.580398
ILL.cotV-BSU11780.1~387	3.32612	1.29796	1.64075	0.791079	0.428898	0.724066
ILL.cotW-BSU11770.1~318	1.90795	-1.71915	2.31447	-0.742784	0.457612	NA
ILL.cotX-BSU11760.99~617	6.12648	-0.293351	1.26078	-0.232674	0.816015	0.942789
ILL.cotY-BSU11750.1~489	1.8558	1.39571	2.37179	0.588463	0.556221	NA
ILL.cotZ-BSU11740.1~447	1.3481	-0.13057	2.62749	-0.0496936	0.960367	NA
ILL.coxA-BSU27830.148~744	27.3516	1.01504	0.641007	1.5835	0.113307	0.358583
ILL.crcBA-BSU09600.1~357	261.005	-0.272956	0.323314	-0.844245	0.398533	0.70168
ILL.crh-BSU34740.24~281	1085	-0.0654218	0.31648	-0.206717	0.836231	0.950797
ILL.csaA-BSU19040.1~333	93.3825	-0.0297215	0.485346	-0.0612377	0.95117	0.984802
ILL.csbA-BSU35180.68~298	329.618	0.0173189	0.328005	0.0528006	0.957891	0.986357
ILL.csbB-BSU08600.1~990	1230.92	-0.692442	0.30146	-2.29696	0.0216209	0.116248
ILL.csbC-BSU39810.18~1403	87.0946	2.26468	0.501346	4.5172	6.26632e-06	0.000132311
ILL.csbD-BSU36670.14~202	5.21218	2.10847	1.39298	1.51363	0.130119	0.386165
ILL.csbX-BSU27760.6~1313	893.17	1.30424	0.347183	3.75663	0.000172216	0.0022966
ILL.csfB-BSU00240.130~324	553.856	1.87676	1.66247	1.1289	0.25894	0.558855
ILL.csgA-BSU02070.112~360	5.49817	2.28859	1.60513	1.4258	0.153926	0.424481
ILL.cshA-BSU04580.1~1536	23621.4	0.225054	0.3357	0.670404	0.5026	0.773809
ILL.cshB-BSU25140.29~1345	5077.45	0.248471	0.340445	0.729841	0.465487	0.750954
ILL.csn-BSU26890.12~845	193.591	-0.543742	0.344842	-1.57679	0.114845	0.359522
ILL.csoR-BSU33520.10~315	270.551	0.35283	0.335294	1.0523	0.292662	0.597107
ILL.cspB-BSU09100.69~272	71788.1	0.146936	0.305329	0.481239	0.630347	0.861894
ILL.cspC-BSU05120.89~289	13258.1	0.210824	0.410342	0.513776	0.607408	0.845616
ILL.cspD-BSU21930.26~226	19669.1	0.130574	0.277131	0.471164	0.637524	0.864967
ILL.cspR-BSU08930.1~483	3030.81	0.550815	0.359027	1.53419	0.124983	0.377277
ILL.csrA-BSU35370.1~225	195.918	0.108378	0.361351	0.299925	0.764234	0.919796
ILL.cssR-BSU33010.11~688	248.228	-0.155822	0.438003	-0.355756	0.722023	0.904188
ILL.cssS-BSU33020.1~1356	653.901	-0.295894	0.319651	-0.925679	0.354613	0.66329
ILL.cstA-BSU28710.9~1805	2358.38	0.798035	0.412747	1.93347	0.0531779	0.225533
ILL.ctaA-BSU14870.355~1275	1596.84	-0.0364696	0.395438	-0.0922259	0.926519	0.976643
ILL.ctaB-BSU14880.1~918	5836.1	0.312267	0.35608	0.876958	0.380509	0.685593
ILL.ctaC-BSU14890.224~1294	397.366	0.674685	0.323126	2.08799	0.0367987	0.171671
ILL.ctaD-BSU14900.33~1901	748.35	0.724949	0.356918	2.03114	0.0422412	0.188718
ILL.ctaE-BSU14910.1~624	246.029	0.484975	0.349202	1.38881	0.164891	0.441232
ILL.ctaF-BSU14920.1~333	116.851	0.548289	0.442063	1.2403	0.214866	0.507124
ILL.ctaG-BSU14930.1~894	213.012	0.782308	0.369403	2.11776	0.0341953	0.161948
ILL.ctaO-BSU12080.118~1107	59.304	-0.0780605	0.528907	-0.147588	0.882668	0.962268
ILL.ctc-BSU00520.18~632	8084.13	-0.42654	0.281081	-1.5175	0.12914	0.384951
ILL.ctpA-BSU19590.12~1412	4874.5	0.29034	0.298189	0.973679	0.330216	0.638995
ILL.ctpB-BSU35240.140~1582	162.257	2.02961	0.706722	2.87186	0.00408061	0.0323102
ILL.ctrA-BSU09460.120~1517	12.5452	-1.94519	1.21661	-1.59886	0.109851	0.35288
ILL.ctsR-BSU00830.134~598	880.916	0.713678	0.624749	1.14234	0.253311	0.553896
ILL.cueR-BSU09560.8~439	1402.04	0.0927537	0.285484	0.324899	0.745257	0.914062
ILL.cwlA-BSU25900.1~819	18.2132	0.650894	0.738213	0.881716	0.377931	0.684388
ILL.cwlC-BSU17410.1~768	84.2032	-0.545511	0.469463	-1.16199	0.245239	0.54239
ILL.cwlD-BSU01530.60~773	55.0888	0.842892	0.524022	1.6085	0.107725	0.349093
ILL.cwlH-BSU25710.45~797	7.42111	1.50951	1.11981	1.348	0.177658	0.45962
ILL.cwlJ-BSU02600.314~742	50.7973	0.180338	0.508033	0.354972	0.72261	0.904188
ILL.cwlK-BSU02810.60~563	102.778	0.181411	0.391247	0.463673	0.642882	0.869241
ILL.cwlO-BSU34800.178~1599	32445.2	-0.0599077	0.430123	-0.139281	0.889228	0.963639
ILL.cwlS-BSU19410.274~1518	510.721	-0.623921	0.346745	-1.79937	0.0719609	0.272899
ILL.cycB-BSU34160.25~1290	773.612	1.78472	0.509067	3.50587	0.000455115	0.0053235
ILL.cydA-BSU38760.182~1588	52.8549	1.98343	0.759703	2.61079	0.00903329	0.0619644
ILL.cydB-BSU38750.1~1017	91.7522	2.55542	0.982391	2.60122	0.00928927	0.0630799
ILL.cydC-BSU38740.1~1704	196.364	2.63138	0.935034	2.81421	0.00488968	0.0376859
ILL.cydD-BSU38730.1~1728	303.76	2.47742	0.902973	2.74362	0.00607651	0.0452834
ILL.cyeA-BSU18770.1~879	74.2029	0.57447	0.439925	1.30584	0.191608	0.47809
ILL.cyeB-BSU34000.18~935	196.329	0.415418	0.375739	1.1056	0.268899	0.568955
ILL.cymR-BSU27520.71~487	1463.9	0.52898	0.309571	1.70875	0.0874967	0.307109
ILL.cypA-BSU26740.1~1233	91.3487	0.450274	0.52643	0.855335	0.392366	0.695215
ILL.cypB-BSU27160.16~3180	931.493	-0.180052	0.387948	-0.464113	0.642567	0.869241
ILL.cypC-BSU02100.90~1343	36.6476	0.459732	0.632736	0.726579	0.467484	0.751551
ILL.cypX-BSU35060.1~1218	310.007	0.0248092	0.352395	0.0704017	0.943874	0.983667
ILL.cysC-BSU15600.1~594	259.563	-0.819714	0.547097	-1.4983	0.134056	0.391263
ILL.cysE-BSU00930.125~778	771.943	-0.22538	0.334548	-0.673685	0.500512	0.772943
ILL.cysH-BSU15570.162~863	739.634	-0.112857	0.536937	-0.210187	0.833522	0.950252
ILL.cysJ-BSU33440.32~1849	1083.05	0.75628	0.632501	1.1957	0.231815	0.525602
ILL.cysK-BSU00730.1~927	6143.14	-0.344987	0.339012	-1.01763	0.308856	0.616094
ILL.cysL-BSU37650.6~905	648.276	0.429234	0.32165	1.33447	0.182049	0.465338
ILL.cysP-BSU15580.5~1069	522.524	-0.164226	0.580029	-0.283134	0.777074	0.930652
ILL.cysS-BSU00940.1~1401	1783.62	-0.31498	0.284396	-1.10754	0.268061	0.568362
ILL.czcD-BSU26650.15~950	62.4991	-0.0472939	0.507509	-0.0931883	0.925754	0.976643
ILL.czrA-BSU19120.12~335	275.727	0.48474	0.318634	1.52131	0.128183	0.383225
ILL.dacA-BSU00100.61~1392	12753.3	0.0302543	0.326733	0.0925964	0.926224	0.976643
ILL.dacB-BSU23190.123~1271	231.345	1.81818	0.430667	4.22177	2.42391e-05	0.000429107
ILL.dacC-BSU18350.33~1508	129.704	0.0559447	0.408213	0.137048	0.890993	0.96437
ILL.dacF-BSU23480.1~1170	25.1035	3.79234	0.857643	4.42181	9.78762e-06	0.000196431
ILL.dapA-BSU16770.1~873	8214.47	0.0387409	0.280802	0.137965	0.890268	0.96437
ILL.dapB-BSU22490.12~815	1186.99	-0.146791	0.299091	-0.490789	0.623575	0.85665
ILL.dapF-BSU32170.20~874	2405.12	-0.0536946	0.327974	-0.163716	0.869955	0.960718
ILL.dapG-BSU16760.92~1306	7234.9	0.00329287	0.277928	0.0118479	0.990547	0.998069
ILL.dapH-BSU14180.21~731	7066.05	-0.388027	0.284925	-1.36186	0.173243	0.454876
ILL.dapL-BSU14190.70~1194	2271.55	0.687066	0.289337	2.37462	0.0175669	0.100304
ILL.dat-BSU09670.1~849	746.22	-0.304007	0.455824	-0.666939	0.504811	0.775761
ILL.dck-BSU00140.1~654	1353.73	-0.281363	0.293903	-0.957335	0.338398	0.649127
ILL.dctB-BSU04440.1~1053	487.452	0.504485	0.325589	1.54945	0.121273	0.370489
ILL.dctP-BSU04470.1~1266	9913.83	0.692067	0.546486	1.26639	0.205372	0.495698
ILL.dctR-BSU04460.1~681	273.541	0.003181	0.316642	0.010046	0.991985	0.998069
ILL.dctS-BSU04450.70~1677	564.205	0.229762	0.304303	0.755043	0.450223	0.742908
ILL.ddl-BSU04560.175~1239	7011.52	-0.149532	0.337094	-0.44359	0.657339	0.875157
ILL.deaD-BSU39110.1~1440	3704.64	-0.264795	0.266075	-0.995192	0.319643	0.627218
ILL.def-BSU14560.7~561	1951.05	0.428321	0.301882	1.41884	0.155947	0.427167
ILL.def-BSU15720.27~509	706.01	0.57444	0.305543	1.88006	0.0600998	0.244869
ILL.degA-BSU10840.18~1031	555.271	-0.108933	0.318912	-0.341577	0.732669	0.909948
ILL.degQ-BSU31720.193~333	98.1521	1.5984	0.647261	2.46948	0.0135311	0.0826129
ILL.degR-BSU21940.37~219	255.144	-1.3445	0.432214	-3.11072	0.00186629	0.0170789
ILL.degS-BSU35500.1~1158	2413.1	0.0407842	0.267992	0.152185	0.879041	0.962268
ILL.degU-BSU35490.2~691	2847.4	0.343212	0.280094	1.22534	0.220446	0.513613
ILL.deoC-BSU39420.1~672	3324.74	0.435724	0.332574	1.31016	0.190142	0.477003
ILL.deoD-BSU19630.1~702	3328.31	-0.102812	0.2663	-0.386077	0.69944	0.895253
ILL.deoR-BSU39430.35~976	1484.52	0.744402	0.399617	1.86279	0.0624917	0.252081
ILL.des-BSU19180.162~1220	525.623	-0.97823	0.861953	-1.1349	0.256417	0.557059
ILL.desK-BSU19190.5~1117	167.448	-0.032587	0.525751	-0.0619817	0.950577	0.9847
ILL.desR-BSU19200.1~600	152.997	-0.230799	0.36921	-0.625114	0.531896	0.793635
ILL.dfrA-BSU21810.1~507	1126.72	0.318079	0.370489	0.858538	0.390596	0.69329
ILL.dgcK-BSU09120.1~1080	2205.8	-0.077178	0.276791	-0.278831	0.780374	0.932012
ILL.dgcP-BSU29650.71~1810	2180.41	0.100294	0.296942	0.337758	0.735545	0.909948
ILL.dgcW-BSU13420.334~2583	651.193	-1.95563	0.311269	-6.28277	3.32587e-10	3.54818e-08
ILL.dgk-BSU00150.1~624	1269.51	-0.207752	0.281424	-0.738217	0.460382	0.747963
ILL.dgkA-BSU25310.1~372	614.704	0.034187	0.355143	0.0962626	0.923312	0.976322
ILL.dgrA-BSU22910.1~654	508.13	-0.539665	0.333566	-1.61787	0.105691	0.344432
ILL.dhaS-BSU19310.106~1593	3214.96	0.373459	0.268851	1.38909	0.164804	0.441232
ILL.dhbA-BSU32000.122~907	822.792	-0.738712	0.465009	-1.5886	0.112151	0.356472
ILL.dhbB-BSU31970.1~939	687.454	-1.01835	0.406123	-2.5075	0.012159	0.0770194
ILL.dhbC-BSU31990.26~1222	1186.44	-0.483793	0.4923	-0.98272	0.325745	0.633671
ILL.dhbE-BSU31980.1~1620	1258.57	-0.56537	0.49009	-1.1536	0.248663	0.547274
ILL.dhbF-BSU31960.1~7137	2927.02	-1.98836	0.43064	-4.61722	3.88917e-06	8.93887e-05
ILL.dinB-BSU05630.14~532	414.125	-0.217054	0.324297	-0.669308	0.503299	0.774207
ILL.dinF-BSU21710.72~1409	1038.01	1.62971	0.411992	3.95567	7.632e-05	0.00113334
ILL.dinG-BSU22400.1~2796	9292.38	0.603891	0.276152	2.18681	0.0287567	0.144773
ILL.divIB-BSU15240.88~879	1345.28	0.505332	0.279628	1.80716	0.070738	0.271051
ILL.divIC-BSU00620.18~395	2051.3	-0.114788	0.300086	-0.382515	0.702079	0.895253
ILL.divIVA-BSU15420.1~495	4546.95	0.224259	0.277814	0.807229	0.419535	0.71703
ILL.dltA-BSU38500.1~1512	16223.9	-0.792249	0.272095	-2.91166	0.00359509	0.0293841
ILL.dltB-BSU38510.1~1188	11188.7	-0.902673	0.342629	-2.63455	0.00842491	0.0588872
ILL.dltC-BSU38520.17~253	1668.54	-1.12211	0.372641	-3.01123	0.00260194	0.0226896
ILL.dltD-BSU38530.1~1179	13157.1	-0.819815	0.280129	-2.92656	0.00342736	0.0285308
ILL.dltE-BSU38540.1~759	9750.84	-0.74046	0.26538	-2.79019	0.00526774	0.0399999
ILL.dnaA-BSU00010.281~1621	11200.8	-0.371457	0.408757	-0.908748	0.363483	0.670105
ILL.dnaB-BSU28990.115~1533	1836.48	0.634613	0.345706	1.8357	0.0664018	0.260709
ILL.dnaC-BSU40440.25~1389	4016.92	0.076538	0.288304	0.265477	0.790642	0.934479
ILL.dnaD-BSU22350.77~775	2504.51	0.413196	0.342066	1.20794	0.227069	0.520961
ILL.dnaE-BSU29230.1~3348	4902.3	0.0450416	0.312846	0.143974	0.885521	0.962287
ILL.dnaG-BSU25210.1~1812	11734.2	-0.271337	0.366619	-0.740106	0.459236	0.747963
ILL.dnaI-BSU28980.1~936	1401.49	0.575981	0.345679	1.66623	0.0956677	0.32455
ILL.dnaJ-BSU25460.200~1327	5481.97	-0.085187	0.3624	-0.235063	0.81416	0.942691
ILL.dnaK-BSU25470.24~1859	22835.4	0.154246	0.262135	0.588422	0.556249	0.807676
ILL.dnaN-BSU00020.179~1315	8596.42	0.170789	0.441282	0.38703	0.698734	0.895253
ILL.dnaX-BSU00190.36~1727	6874.69	0.643981	0.269722	2.38757	0.01696	0.0978036
ILL.dppA-BSU12920.12~836	52.1561	-0.833738	0.732465	-1.13826	0.25501	0.556411
ILL.dppB-BSU12930.1~927	21.3103	-0.0108629	0.991768	-0.010953	0.991261	0.998069
ILL.dppC-BSU12940.1~963	10.5722	-0.601713	0.954116	-0.63065	0.528269	0.791142
ILL.dppD-BSU12950.1~1008	9.50803	-1.6113	1.04948	-1.53532	0.124705	0.376716
ILL.dppE-BSU12960.3~1652	47.5193	-0.165634	0.522354	-0.317091	0.751174	0.916097
ILL.dprA-BSU16110.61~954	631.423	-0.496008	0.549796	-0.902167	0.366968	0.673066
ILL.dps-BSU30650.1~438	1545.1	-0.535985	0.329515	-1.62659	0.103825	0.340538
ILL.drm-BSU23500.1~1185	13571.1	0.43552	0.262426	1.65959	0.0969966	0.327414
ILL.dsdA-BSU23770.76~1422	742.928	0.0356795	0.323724	0.110216	0.912238	0.973561
ILL.dtpT-BSU03670.1~1479	3736.04	1.03201	0.36959	2.79232	0.00523319	0.0398933
ILL.dusB-BSU00810.24~1025	5670.61	-0.0411356	0.274212	-0.150014	0.880753	0.962268
ILL.dusC-BSU08030.41~1018	1723.05	0.0240831	0.454797	0.0529534	0.957769	0.986357
ILL.dxr-BSU16550.1~1152	7421.54	0.945178	0.29188	3.23824	0.00120268	0.0119501
ILL.dxs-BSU24270.1~1902	7270.37	0.538584	0.317065	1.69865	0.0893849	0.311579
ILL.eag-BSU13650.81~512	199.457	1.36179	0.40452	3.36643	0.00076148	0.00810247
ILL.ebrA-BSU17300.7~324	89.8996	-0.299299	0.412936	-0.724805	0.468571	0.752312
ILL.ebrB-BSU17290.5~358	115.878	-0.0546034	0.385035	-0.141814	0.887227	0.963071
ILL.ecsA-BSU10040.378~1121	725.141	-0.716765	0.333614	-2.14848	0.0316754	0.154341
ILL.ecsB-BSU10050.1~1227	1281.46	-0.384392	0.310412	-1.23833	0.215595	0.507437
ILL.ecsC-BSU10060.18~728	1055.38	-0.421284	0.2837	-1.48496	0.137553	0.396102
ILL.efeM-BSU38270.1~1158	4048.49	-0.472511	0.312889	-1.51016	0.131004	0.387939
ILL.efeN-BSU38260.19~1269	5540.72	-0.355936	0.288467	-1.23389	0.217245	0.509081
ILL.efeU-BSU38280.25~1470	2329.46	-0.296038	0.283827	-1.04302	0.296938	0.601892
ILL.efp-BSU24450.25~582	10879.9	0.28625	0.276956	1.03356	0.301343	0.607481
ILL.eglS-BSU18130.34~1533	164.3	-0.144357	0.368114	-0.392154	0.694945	0.894099
ILL.endB-BSU04650.18~299	6365.77	-0.364537	0.278097	-1.31083	0.189916	0.476748
ILL.engA-BSU22840.27~1337	7485.05	-0.0430351	0.356742	-0.120634	0.903981	0.970792
ILL.engB-BSU28190.1~588	2059.49	-0.339802	0.278857	-1.21855	0.223013	0.516538
ILL.eno-BSU33900.30~1322	44972.3	0.531432	0.314634	1.68905	0.0912097	0.314572
ILL.epr-BSU38400.9~1946	2014.7	-2.23154	0.308175	-7.24116	4.44865e-13	8.58802e-11
ILL.epsA-BSU34370.38~742	54.402	-3.20111	0.622393	-5.14323	2.7005e-07	1.01369e-05
ILL.epsB-BSU34360.6~689	65.4658	-2.44989	0.536293	-4.56819	4.91949e-06	0.000110186
ILL.epsC-BSU34350.1~1797	175.041	-2.03072	0.398333	-5.09805	3.43174e-07	1.24217e-05
ILL.epsD-BSU34340.1~1146	112.326	-1.8331	0.430381	-4.25925	2.05117e-05	0.000371225
ILL.epsE-BSU34330.1~837	62.8179	-2.30824	0.497417	-4.64045	3.47654e-06	8.29054e-05
ILL.epsF-BSU34320.1~1155	64.6264	-1.48903	0.493061	-3.01997	0.00252796	0.0221826
ILL.epsG-BSU34310.1~1104	42.4226	-1.14287	0.557998	-2.04816	0.0405446	0.183813
ILL.epsH-BSU34300.25~1059	44.2892	-1.68756	0.67681	-2.4934	0.0126524	0.0790339
ILL.epsI-BSU34290.5~1081	53.9586	-1.41779	0.518931	-2.73214	0.00629251	0.0463023
ILL.epsJ-BSU34280.1~1035	69.2923	-1.21767	0.466359	-2.61101	0.00902762	0.0619644
ILL.epsK-BSU34265.1~1518	81.6361	-1.36281	0.425779	-3.20075	0.00137071	0.0131368
ILL.epsL-BSU34250.1~609	41.2403	-1.06763	0.614315	-1.73792	0.0822256	0.296041
ILL.epsM-BSU34240.1~651	43.1348	-1.14539	0.605053	-1.89303	0.0583533	0.239437
ILL.epsN-BSU34230.5~1171	80.0488	-1.96924	0.507342	-3.88148	0.000103823	0.00148204
ILL.epsO-BSU34220.1~969	66.7484	-1.73074	0.489789	-3.53365	0.00040987	0.00487277
ILL.era-BSU25290.1~906	5186.28	0.216751	0.280987	0.771391	0.440475	0.73485
ILL.estA-BSU02700.18~656	645.996	0.182631	0.290202	0.629325	0.529137	0.791849
ILL.estB-BSU08350.6~638	714.234	-0.299644	0.343252	-0.872956	0.382687	0.687074
ILL.etfA-BSU28520.12~989	1153.44	0.0494959	0.304849	0.162362	0.871021	0.960986
ILL.etfB-BSU28530.15~788	852.361	-0.0243025	0.289663	-0.0838991	0.933137	0.979528
ILL.eutD-BSU37660.43~1014	20909.2	-0.350944	0.295971	-1.18573	0.235727	0.528268
ILL.exlX-BSU18630.1~699	380.062	0.305402	0.341124	0.895281	0.370637	0.67644
ILL.exoA-BSU22010.13~903	1445.14	0.709987	0.292999	2.42317	0.0153857	0.0906594
ILL.exoAA-BSU40880.9~767	1312.11	2.08591	0.355186	5.87273	4.28679e-09	3.40758e-07
ILL.exuM-BSU12310.68~1447	43.2365	2.69328	0.705475	3.81768	0.000134714	0.00186392
ILL.exuR-BSU12370.25~1026	577.124	-0.177055	0.290563	-0.609353	0.542291	0.799726
ILL.exuT-BSU12360.1~1269	20.8897	-0.122608	0.70821	-0.173124	0.862554	0.956909
ILL.ezrA-BSU29610.1~1689	10281.6	0.175648	0.315136	0.557373	0.577272	0.823362
ILL.fabD-BSU15900.1~954	6299.47	0.064445	0.357565	0.180233	0.856969	0.956192
ILL.fabF-BSU11340.23~1264	9878.8	-0.000226826	0.410701	-0.000552289	0.999559	0.999871
ILL.fabG-BSU15910.1~741	6649.08	0.12632	0.298171	0.423648	0.671822	0.881984
ILL.fabG-BSU16870.55~783	876.846	1.69262	0.31251	5.41621	6.08766e-08	3.16402e-06
ILL.fabG-BSU18500.21~737	4399.73	0.0303118	0.275288	0.110109	0.912323	0.973561
ILL.fabG-BSU29420.41~808	1302.42	-0.0274082	0.312924	-0.0875876	0.930204	0.978985
ILL.fabHA-BSU11330.1~939	5307.66	-0.146754	0.48578	-0.302101	0.762575	0.91942
ILL.fabHB-BSU10170.2~979	766.921	0.152198	0.545587	0.278961	0.780275	0.932012
ILL.fabI-BSU11720.136~912	12827.1	0.319411	0.363581	0.878513	0.379666	0.685045
ILL.fabL-BSU08650.1~753	2855.89	-0.30709	0.272861	-1.12545	0.2604	0.559896
ILL.fabZ-BSU36370.51~476	1948.21	-0.499853	0.309905	-1.61292	0.106761	0.347359
ILL.fadE-BSU32820.15~1799	275.427	-0.363688	0.391574	-0.928783	0.353002	0.661919
ILL.fadF-BSU37180.37~2154	315.78	1.32779	0.442474	3.00084	0.00269235	0.0234223
ILL.fadG-BSU14071.1~1731	641.225	-0.426583	0.35422	-1.20429	0.228477	0.522713
ILL.fadM-BSU32850.1~909	5.26433	0.76085	1.25793	0.604842	0.545284	0.801542
ILL.fadN-BSU32840.1~2448	282.777	-0.497254	0.503559	-0.987478	0.323408	0.630942
ILL.fadR-BSU28550.6~590	430.593	0.0307947	0.32318	0.0952865	0.924087	0.976322
ILL.fbaA-BSU37120.73~930	72758.8	0.328107	0.329471	0.99586	0.319318	0.626906
ILL.fbp-BSU40190.1~2016	1946.43	-0.419729	0.296219	-1.41695	0.156497	0.428095
ILL.fdhD-BSU36710.19~807	928.762	0.354309	0.296576	1.19467	0.232218	0.525868
ILL.fer-BSU23040.72~320	5244.63	0.601862	0.394256	1.52658	0.126866	0.381224
ILL.feuA-BSU01630.1~954	1281.56	-0.174137	0.382222	-0.455593	0.648683	0.872226
ILL.feuB-BSU01620.1~1005	520.617	-0.404956	0.297493	-1.36123	0.173442	0.455102
ILL.feuC-BSU01610.1~1011	536.151	-0.32244	0.290903	-1.10841	0.267685	0.568362
ILL.ffh-BSU15980.14~1354	21604.3	-0.00665209	0.319715	-0.0208063	0.9834	0.997674
ILL.fhuB-BSU33310.1~1155	1771.22	0.523299	0.431598	1.21247	0.225333	0.518739
ILL.fhuC-BSU33290.16~825	2480.48	0.0971952	0.348743	0.278702	0.780474	0.932012
ILL.fhuD-BSU33320.37~984	8221.46	0.885536	0.397878	2.22565	0.0260378	0.134767
ILL.fhuG-BSU33300.1~1011	1751.29	0.325102	0.411333	0.790362	0.429317	0.724066
ILL.flgB-BSU16180.49~438	860.606	-0.740249	0.291842	-2.53647	0.0111977	0.0731003
ILL.flgC-BSU16190.1~453	1013.98	-0.516493	0.350021	-1.4756	0.14005	0.40068
ILL.flgD-BSU16280.1~423	745.415	-1.47214	0.285245	-5.16098	2.45659e-07	9.48477e-06
ILL.flgG-BSU16290.22~816	1792.29	-1.53106	0.271904	-5.63089	1.7928e-08	1.19148e-06
ILL.flgK-BSU35410.13~1536	3784.44	-1.40072	0.284738	-4.91931	8.68488e-07	2.64726e-05
ILL.flgL-BSU35400.11~907	2502.11	-1.40698	0.308517	-4.56045	5.10439e-06	0.000113186
ILL.flgM-BSU35430.81~347	722.103	-1.41569	0.286134	-4.94764	7.512e-07	2.34259e-05
ILL.flhA-BSU16390.1~2034	6755.45	-0.181168	0.295403	-0.61329	0.539685	0.799552
ILL.flhB-BSU16380.1~1083	1508.97	-1.49888	0.274803	-5.45437	4.91461e-08	2.62156e-06
ILL.flhF-BSU16400.1~1101	1145.63	-1.46978	0.280133	-5.24672	1.54835e-07	6.40509e-06
ILL.flhO-BSU36400.66~878	2698.53	-0.578658	0.310104	-1.86601	0.06204	0.250758
ILL.flhP-BSU36390.34~843	2502.16	-0.606269	0.298036	-2.03421	0.04193	0.188101
ILL.fliD-BSU35340.18~1514	4900.89	-1.66425	0.272085	-6.11666	9.55553e-10	9.68453e-08
ILL.fliE-BSU16200.1~321	763.174	-0.842465	0.285508	-2.95076	0.00316997	0.0267173
ILL.fliF-BSU16210.8~1618	3784.52	-0.916805	0.283904	-3.22928	0.00124104	0.0122494
ILL.fliG-BSU16220.13~1029	2393.15	-1.00814	0.297815	-3.38512	0.00071146	0.00761018
ILL.fliH-BSU16230.1~627	1120.68	-0.988673	0.282031	-3.50555	0.000455663	0.0053235
ILL.fliI-BSU16240.1~1317	2961.52	-1.1146	0.277268	-4.01995	5.82097e-05	0.000883694
ILL.fliJ-BSU16250.3~446	629.665	-1.67217	0.532285	-3.1415	0.00168085	0.0155931
ILL.fliK-BSU16270.1~1464	2946.53	-1.42252	0.285613	-4.98061	6.33857e-07	2.03941e-05
ILL.fliL-BSU16300.1~423	450.724	-1.68564	0.32449	-5.19474	2.05005e-07	8.06883e-06
ILL.fliM-BSU16310.34~1032	2086.34	-1.47733	0.281428	-5.24941	1.52589e-07	6.37728e-06
ILL.fliP-BSU16350.1~666	924.396	-1.57979	0.330543	-4.77937	1.75844e-06	4.72101e-05
ILL.fliQ-BSU16360.1~270	264.354	-1.6214	0.327344	-4.95321	7.29998e-07	2.29412e-05
ILL.fliR-BSU16370.1~780	893.638	-1.42679	0.28142	-5.06996	3.97892e-07	1.40266e-05
ILL.fliS-BSU35330.1~402	968	-1.78327	0.300941	-5.92565	3.11056e-09	2.57351e-07
ILL.fliT-BSU35320.1~342	1081.47	-1.79346	0.301033	-5.95767	2.55858e-09	2.25489e-07
ILL.fliY-BSU16320.1~1137	2754.63	-1.25429	0.285509	-4.39319	1.11702e-05	0.000218763
ILL.fliZ-BSU16340.13~672	1096.49	-1.34298	0.290802	-4.61818	3.87126e-06	8.93887e-05
ILL.fmnP-BSU23050.106~678	1616.43	1.62061	0.307654	5.26766	1.38177e-07	5.9157e-06
ILL.fmt-BSU15730.5~958	2114.61	0.713504	0.278198	2.56473	0.0103255	0.0683981
ILL.fni-BSU22870.1~1050	3405.95	-0.122971	0.274583	-0.447846	0.654265	0.875074
ILL.fnr-BSU37310.5~721	169.344	-0.569149	0.348872	-1.6314	0.102806	0.339395
ILL.folB-BSU00780.1~363	582.048	-0.0640983	0.353377	-0.181388	0.856063	0.956192
ILL.folC-BSU28080.60~1352	2104.27	0.073811	0.286806	0.257355	0.796905	0.935894
ILL.folD-BSU24310.12~863	7888.57	0.203827	0.290243	0.702264	0.482514	0.761726
ILL.folE-BSU22780.188~760	7679.99	1.23804	0.297027	4.16811	3.07136e-05	0.000523163
ILL.folK-BSU00790.1~504	1453.93	0.0610101	0.333952	0.182691	0.85504	0.956192
ILL.frlB-BSU32610.3~989	127.816	-1.52195	0.57625	-2.64113	0.00826298	0.0579579
ILL.frlD-BSU32570.1~855	69.9303	0.118363	0.456279	0.25941	0.795319	0.935894
ILL.frlM-BSU32580.1~903	4.80559	-0.722011	1.59774	-0.451895	0.651345	0.874355
ILL.frlN-BSU32590.58~936	14.37	-1.4708	0.920158	-1.59842	0.10995	0.35292
ILL.frlO-BSU32600.72~1340	34.354	-1.58598	0.609416	-2.60246	0.00925568	0.0630631
ILL.frlR-BSU32560.1~789	451.716	0.593309	0.298802	1.98563	0.0470748	0.205086
ILL.frr-BSU16520.1~558	11408.1	0.0699574	0.268165	0.260875	0.794189	0.935441
ILL.fruA-BSU14400.1~1908	2747.82	0.696772	0.271196	2.56926	0.0101916	0.0677047
ILL.fruK-BSU14390.1~912	1137.27	0.597438	0.316647	1.88676	0.0591924	0.242145
ILL.fruR-BSU14380.8~763	840.899	0.734112	0.316264	2.3212	0.0202759	0.111835
ILL.ftsA-BSU15280.2~1324	9642.09	0.0730726	0.264872	0.275879	0.782641	0.932012
ILL.ftsE-BSU35260.114~800	4014.58	0.0622757	0.528842	0.117759	0.906259	0.971384
ILL.ftsH-BSU00690.1~1914	48413.5	-0.158526	0.269104	-0.589087	0.555803	0.807319
ILL.ftsL-BSU15150.1~354	1592.68	0.212378	0.335295	0.633408	0.526467	0.79046
ILL.ftsR-BSU18420.35~892	276.21	-0.444212	0.432715	-1.02657	0.304623	0.610752
ILL.ftsW-BSU14850.206~1417	4216.22	1.55985	0.412852	3.77823	0.000157949	0.00212733
ILL.ftsX-BSU35250.1~891	5976.8	0.305762	0.413546	0.739366	0.459685	0.747963
ILL.ftsY-BSU15950.1~990	4864.1	0.395787	0.293952	1.34644	0.178162	0.460044
ILL.ftsZ-BSU15290.1~1149	13054.8	0.201646	0.273271	0.737898	0.460577	0.747963
ILL.fumC-BSU33040.1~1389	13160.3	0.28902	0.347378	0.832004	0.405407	0.706282
ILL.fur-BSU23520.10~459	3382.02	0.61679	0.375854	1.64104	0.10079	0.334646
ILL.fusA-BSU01120.54~2132	330804	-0.370458	0.276428	-1.34016	0.180192	0.461757
ILL.fxsA-BSU29170.87~470	3872.77	0.755636	0.275223	2.74554	0.00604121	0.0451033
ILL.gabD-BSU03910.1~1389	1114.99	-0.566427	0.34613	-1.63646	0.101743	0.336984
ILL.gabP-BSU06310.9~1418	194.08	-0.940801	0.524523	-1.79363	0.0728722	0.275069
ILL.gabR-BSU03890.1~1440	79.8781	-0.814661	0.42501	-1.9168	0.0552628	0.231605
ILL.gabT-BSU03900.107~1417	48.7183	0.106586	0.50902	0.209395	0.83414	0.950672
ILL.galE-BSU38860.1~1020	6917.65	0.0106464	0.313498	0.03396	0.972909	0.993087
ILL.galK-BSU38200.81~1253	848.782	0.0632993	0.298749	0.211881	0.8322	0.949616
ILL.galT-BSU38190.1~1542	1712.7	0.140874	0.27938	0.504238	0.614094	0.849575
ILL.ganA-BSU34130.19~2082	521.389	0.459648	0.398696	1.15288	0.248961	0.547335
ILL.ganB-BSU34120.1~1290	173.236	1.053	0.366523	2.87293	0.00406679	0.0323102
ILL.ganP-BSU34150.1~1257	394.217	1.11637	0.519997	2.14688	0.0318031	0.154625
ILL.ganQ-BSU34140.1~852	184.101	0.904311	0.477327	1.89453	0.0581546	0.238864
ILL.ganR-BSU34170.44~1036	273.756	0.199383	0.360662	0.552825	0.580383	0.82557
ILL.gapA-BSU33940.13~1020	66612.7	0.485056	0.270733	1.79164	0.0731911	0.275759
ILL.gapB-BSU29020.36~1058	410.526	-0.212439	0.44056	-0.482202	0.629662	0.861894
ILL.garD-BSU02510.91~1623	470.818	1.22966	0.302834	4.06051	4.89646e-05	0.000772383
ILL.gatA-BSU06680.1~1458	18014.8	-0.00932101	0.265282	-0.0351363	0.971971	0.993037
ILL.gatB-BSU06690.1~1431	19607	0.116626	0.265622	0.43907	0.660611	0.876632
ILL.gatC-BSU06670.103~393	3869.27	-0.2685	0.310217	-0.865524	0.386751	0.689789
ILL.gbsA-BSU31060.16~1488	76.6294	-0.482708	0.433675	-1.11306	0.265681	0.565985
ILL.gbsB-BSU31050.1~1209	121.161	-0.480376	0.422559	-1.13683	0.255611	0.556823
ILL.gcp-BSU05940.1~1041	2873.13	1.80845	0.459356	3.93694	8.25285e-05	0.00121221
ILL.gcvPA-BSU24560.30~1376	617.115	-0.820988	0.519569	-1.58013	0.114077	0.359338
ILL.gcvPB-BSU24550.1~1467	732.468	-1.04391	0.447758	-2.33141	0.0197315	0.10974
ILL.gcvT-BSU24570.74~1162	638.709	-0.222024	0.557631	-0.398155	0.690516	0.891352
ILL.gdh-BSU03930.1~786	10.3998	0.624442	0.947302	0.659179	0.509781	0.778637
ILL.gerAA-BSU33050.1~1449	12.031	0.453403	1.06515	0.425671	0.670348	0.881161
ILL.gerAB-BSU33060.1~1098	6.49445	-0.491062	1.21665	-0.403618	0.686494	0.889631
ILL.gerAC-BSU33070.1~1122	13.5131	-0.394838	0.850923	-0.464011	0.64264	0.869241
ILL.gerBA-BSU35800.1~1452	18.4491	0.52231	0.724858	0.720569	0.471175	0.754282
ILL.gerBB-BSU35810.6~1112	37.1018	0.625217	0.543816	1.14968	0.250274	0.549031
ILL.gerBC-BSU35820.1~1125	101.042	0.205277	0.40077	0.512207	0.608506	0.846272
ILL.gerD-BSU01550.1~558	10.6847	-0.0509804	0.962867	-0.0529464	0.957775	0.986357
ILL.gerE-BSU28410.7~231	413.876	1.40281	0.375965	3.73124	0.000190539	0.00249176
ILL.gerKA-BSU03700.1~1635	60.246	0.185303	0.482478	0.384066	0.70093	0.895253
ILL.gerKB-BSU03720.25~1146	88.8381	0.195419	0.451222	0.433089	0.66495	0.878298
ILL.gerKC-BSU03710.1~1224	55.4242	0.146438	0.534311	0.274068	0.784032	0.932012
ILL.gerM-BSU28380.1~1101	207.922	2.27251	0.405693	5.60156	2.1243e-08	1.32491e-06
ILL.gerPA-BSU10720.1~222	3.09032	0.282871	2.13745	0.132341	0.894715	0.964623
ILL.gerPB-BSU10710.1~243	1.48782	-3.98929	2.95628	-1.34943	0.177199	NA
ILL.gerPC-BSU10700.23~640	12.3395	0.162181	0.9444	0.171729	0.863651	0.956909
ILL.gerPD-BSU10690.1~177	1.11747	0.427784	2.84266	0.150488	0.88038	NA
ILL.gerPE-BSU10680.1~402	6.38724	0.91137	1.20209	0.758157	0.448357	0.742197
ILL.gerPF-BSU10670.23~250	8.49557	-0.109287	1.05383	-0.103705	0.917404	0.97512
ILL.gerT-BSU19490.1~474	3.63916	0.239934	1.50405	0.159524	0.873256	0.96129
ILL.ggaA-BSU35690.1106~2446	1756.25	-0.979976	0.83626	-1.17186	0.241255	0.535916
ILL.ggaB-BSU35680.1~2703	2820.7	-0.940209	0.681406	-1.37981	0.167646	0.44508
ILL.ggt-BSU18410.21~1784	19.7251	0.603299	0.875355	0.689205	0.490694	0.767129
ILL.gid-BSU16130.76~1383	3315.16	0.499381	0.313511	1.59287	0.11119	0.355713
ILL.gidA-BSU41010.1~1887	7123.23	-0.289629	0.288201	-1.00495	0.314919	0.620049
ILL.gidB-BSU41000.14~733	3434.99	-0.467466	0.374777	-1.24732	0.212281	0.503561
ILL.glcD-BSU28680.1~1413	1667.76	-1.06376	0.654302	-1.6258	0.103992	0.340812
ILL.glcF-BSU28690.1~1335	1207.11	-1.27452	0.516983	-2.4653	0.01369	0.0831151
ILL.glcK-BSU24850.11~976	855.784	-0.109462	0.291801	-0.375124	0.707568	0.89612
ILL.glcP-BSU10520.29~1234	98.5508	-0.0461703	0.554462	-0.0832705	0.933636	0.979692
ILL.glcR-BSU36300.21~797	296.21	-0.31334	0.463318	-0.676296	0.498853	0.772376
ILL.glcT-BSU13880.8~874	2085.01	0.285419	0.292481	0.975857	0.329135	0.637769
ILL.glcU-BSU03920.1~864	3.29056	0.811004	1.5999	0.506908	0.612219	0.848525
ILL.glgA-BSU30950.1~1455	725.055	4.01415	0.556889	7.20817	5.67076e-13	1.04497e-10
ILL.glgB-BSU30980.17~1900	843.332	5.01659	0.944379	5.31205	1.08398e-07	4.88275e-06
ILL.glgC-BSU30970.1~1143	482.467	4.16336	0.772511	5.38939	7.06966e-08	3.53832e-06
ILL.glgD-BSU30960.24~1055	471.987	4.34482	0.630396	6.89221	5.49341e-12	7.89434e-10
ILL.glgP-BSU30940.1~2397	1288.39	4.14904	0.44626	9.29735	1.43991e-20	8.33913e-18
ILL.glmM-BSU01770.1~1347	7008.77	0.517757	0.343948	1.50533	0.132238	0.390118
ILL.glmS-BSU01780.90~1892	29084.3	-0.112121	0.261769	-0.428322	0.668416	0.880248
ILL.glmU-BSU00500.43~1413	16803.9	-0.38413	0.27193	-1.4126	0.157772	0.431003
ILL.glnA-BSU17460.1~1335	33204.3	0.072669	0.316588	0.229538	0.818451	0.943418
ILL.glnH-BSU27440.1~822	2.066	-1.11228	2.22196	-0.500587	0.616662	NA
ILL.glnJ-BSU02440.116~1348	317.603	0.302528	0.332638	0.909482	0.363096	0.67
ILL.glnK-BSU36520.1~351	126.795	-0.537175	0.494024	-1.08734	0.276884	0.580398
ILL.glnL-BSU02450.11~955	339.278	-0.2976	0.319214	-0.932291	0.351186	0.661138
ILL.glnM-BSU27450.1~651	0.48727	-2.38129	4.4656	-0.533252	0.593859	NA
ILL.glnP-BSU27460.1~657	1.88194	-1.69554	2.28745	-0.741237	0.45855	NA
ILL.glnQ-BSU27430.1~729	0.51753	2.52569	4.37555	0.577229	0.563785	NA
ILL.glnR-BSU17450.1~408	2781.63	-0.186058	0.66252	-0.280834	0.778838	0.931664
ILL.glnT-BSU02420.1~1437	25.2851	-0.219151	0.645916	-0.339287	0.734393	0.909948
ILL.glpD-BSU09300.38~1705	1480.1	1.44646	0.301454	4.79828	1.60031e-06	4.44359e-05
ILL.glpF-BSU09280.126~950	5542.75	2.23261	0.417254	5.35073	8.75994e-08	4.17798e-06
ILL.glpG-BSU24870.1~1524	770.324	0.371331	0.282906	1.31256	0.189331	0.476748
ILL.glpK-BSU09290.1~1491	11951.9	1.6214	0.3344	4.84868	1.24287e-06	3.59901e-05
ILL.glpP-BSU09270.1~579	1304.84	0.297823	0.278625	1.0689	0.285114	0.588386
ILL.glpQ-BSU02130.99~980	4661.72	0.456615	0.376391	1.21314	0.225077	0.518739
ILL.glpT-BSU02140.1~1335	4723.73	0.590195	0.374872	1.57439	0.115398	0.360696
ILL.glpX-BSU37090.31~996	8003.37	0.519307	0.314149	1.65306	0.0983188	0.330775
ILL.gltA-BSU18450.47~4609	3172.24	1.7395	0.333516	5.21563	1.83192e-07	7.28097e-06
ILL.gltC-BSU18460.31~933	871.296	0.44988	0.294103	1.52967	0.126099	0.379796
ILL.gltD-BSU18440.17~1498	1686.84	2.01325	0.430665	4.67474	2.94319e-06	7.40661e-05
ILL.gltP-BSU02340.1~1245	60.7646	1.69747	0.679802	2.49701	0.0125246	0.0784773
ILL.gltR-BSU26670.6~896	189.124	-0.722553	0.516733	-1.39831	0.16202	0.437595
ILL.gltT-BSU10220.66~1355	16597.2	-0.363622	0.263421	-1.38038	0.167469	0.445033
ILL.gltX-BSU00920.1~1452	11295.2	-0.123617	0.317913	-0.388837	0.697396	0.895253
ILL.glxK-BSU40040.25~1173	237.333	-0.281172	0.343211	-0.819242	0.412648	0.711158
ILL.glyA-BSU36900.1~1248	18103.5	-0.395999	0.274098	-1.44474	0.148531	0.417577
ILL.glyQ-BSU25270.83~970	3038.78	-0.474743	0.334527	-1.41914	0.155857	0.427167
ILL.glyS-BSU25260.1~2040	7334.22	-0.349824	0.278688	-1.25525	0.209387	0.499913
ILL.gmk-BSU15680.1~615	6150.62	-0.163561	0.281478	-0.581078	0.561188	0.811851
ILL.gmuA-BSU05820.1~333	165.177	0.994835	0.465646	2.13646	0.0326418	0.157348
ILL.gmuB-BSU05810.1~312	192.311	0.638428	0.523039	1.22061	0.222233	0.515702
ILL.gmuC-BSU05830.1~1329	903.299	0.744365	0.457396	1.6274	0.103653	0.340525
ILL.gmuD-BSU05840.1~1398	975.925	0.509608	0.433656	1.17514	0.239937	0.533642
ILL.gmuE-BSU05860.29~928	439.126	-0.550275	0.392022	-1.40368	0.160413	0.435285
ILL.gmuF-BSU05870.1~948	356.933	-1.59208	0.49216	-3.23488	0.00121692	0.0120621
ILL.gmuG-BSU05880.1~1089	452.39	-1.63258	0.398271	-4.09918	4.14616e-05	0.000669663
ILL.gmuR-BSU05850.22~735	462.944	0.213724	0.402097	0.531524	0.595055	0.836964
ILL.gntK-BSU40060.1~1542	765.859	0.85228	0.362979	2.34801	0.0188738	0.105975
ILL.gntP-BSU40070.1~1347	3294.62	0.0298958	0.303752	0.0984215	0.921598	0.975649
ILL.gntR-BSU40050.16~747	215.055	0.878173	0.497572	1.76492	0.0775777	0.285613
ILL.gntZ-BSU40080.4~1410	9385.24	-0.00404791	0.277235	-0.014601	0.988351	0.998069
ILL.gpr-BSU25540.154~1260	57.621	1.53947	0.533969	2.88307	0.0039382	0.0316775
ILL.gpsA-BSU22830.1~1038	8458.74	0.126992	0.305543	0.415627	0.677683	0.884637
ILL.greA-BSU27320.77~550	7822.19	-0.139656	0.318324	-0.438723	0.660862	0.876632
ILL.groEL-BSU06030.1~1635	58890.4	-0.592383	0.325264	-1.82124	0.0685707	0.265441
ILL.groES-BSU06020.10~294	9738.17	-0.892676	0.325651	-2.74121	0.00612135	0.0454505
ILL.grpE-BSU25480.1~564	6908.37	0.00156225	0.274378	0.00569378	0.995457	0.998746
ILL.gsaB-BSU08710.23~1312	3285.47	0.101572	0.287582	0.353192	0.723944	0.905265
ILL.gsiB-BSU04400.13~384	17.1702	1.53593	0.777747	1.97484	0.0482862	0.208691
ILL.gspA-BSU38430.1~861	90.3588	0.706165	0.636247	1.10989	0.267046	0.567699
ILL.gtaB-BSU35670.73~951	9965.98	0.095651	0.312815	0.305775	0.759776	0.918234
ILL.guaA-BSU06360.88~1629	23781.8	-0.281659	0.3823	-0.73675	0.461275	0.747963
ILL.guaB-BSU00090.1~1467	32166.9	-0.606183	0.262808	-2.30657	0.0210791	0.11455
ILL.guaC-BSU32130.44~1024	877.288	-0.26192	0.393719	-0.665246	0.505893	0.776265
ILL.guaD-BSU13170.125~595	20.0563	-0.820227	0.70817	-1.15823	0.246768	0.544287
ILL.gudB-BSU22960.39~1322	18991.3	-0.0595668	0.290231	-0.20524	0.837385	0.951283
ILL.gudD-BSU02490.1~1368	21.8239	0.157265	0.76242	0.206271	0.83658	0.950797
ILL.gudP-BSU02480.1~1368	72.243	0.724322	0.63049	1.14882	0.250629	0.549512
ILL.gutB-BSU06150.109~1170	212.383	-0.0214096	0.367946	-0.0581867	0.9536	0.984956
ILL.gutP-BSU06160.74~1465	68.8809	-0.403972	0.525211	-0.769161	0.441798	0.735845
ILL.gutR-BSU06140.4~2493	1374.73	0.0213815	0.332107	0.0643812	0.948667	0.9847
ILL.gyrA-BSU00070.211~2676	28042.9	0.363335	0.263455	1.37911	0.167859	0.445355
ILL.gyrB-BSU00060.17~1933	14227.3	-0.00829882	0.272835	-0.030417	0.975735	0.994739
ILL.hag-BSU35360.95~1009	58467.6	-1.68904	0.354006	-4.77123	1.83108e-06	4.82026e-05
ILL.hbs-BSU22790.200~478	70147.3	-0.0532477	0.274642	-0.19388	0.84627	0.952593
ILL.helD-BSU33450.54~2378	2762.46	-0.620736	0.413031	-1.50288	0.13287	0.390715
ILL.hemA-BSU28170.75~1442	3564.46	0.183374	0.309742	0.59202	0.553837	0.805618
ILL.hemAT-BSU10380.1~1299	1737.6	-2.12362	0.279757	-7.59096	3.17549e-14	8.58229e-12
ILL.hemB-BSU28130.1~975	2320.71	0.199251	0.273823	0.727663	0.46682	0.751182
ILL.hemC-BSU28150.33~977	1301.49	0.0452541	0.302832	0.149436	0.881209	0.962268
ILL.hemD-BSU12230.39~851	816.577	-0.618943	0.346709	-1.78519	0.0742298	0.2777
ILL.hemD-BSU28140.1~789	1186.12	0.0662443	0.282241	0.234708	0.814435	0.942691
ILL.hemE-BSU10120.38~1099	1527.17	-0.61191	0.277379	-2.20604	0.027381	0.139443
ILL.hemH-BSU10130.1~933	1916.15	-0.549349	0.270553	-2.03047	0.0423093	0.188718
ILL.hemL-BSU28120.1~1293	5485.94	0.326727	0.286759	1.13938	0.254546	0.555698
ILL.hemN-BSU25500.53~1192	1201.48	0.371447	0.313939	1.18318	0.236738	0.529362
ILL.hemX-BSU28160.1~831	737.918	0.0192566	0.342636	0.0562014	0.955181	0.98557
ILL.hemY-BSU10140.1~1413	2059.62	-0.462746	0.295231	-1.5674	0.11702	0.362969
ILL.hemZ-BSU09840.2~1507	3137.31	0.677482	0.468585	1.44581	0.148232	0.417313
ILL.hepS-BSU22760.164~919	6054.19	0.710698	0.437716	1.62365	0.10445	0.341486
ILL.hepT-BSU22740.1~1047	6982.25	0.63082	0.351272	1.79582	0.0725239	0.274217
ILL.hfq-BSU17340.1~222	250.248	0.214735	0.490434	0.437846	0.661498	0.876663
ILL.hinT-BSU10030.29~466	1862.65	0.126194	0.303091	0.416357	0.677149	0.884458
ILL.hisA-BSU34880.1~738	30.3985	-1.27988	0.627202	-2.04061	0.0412894	0.185986
ILL.hisB-BSU34900.1~585	20.5343	-1.90698	0.756651	-2.52029	0.0117258	0.0755153
ILL.hisC-BSU22620.1~1083	3525.9	-0.155556	0.351037	-0.443132	0.65767	0.87531
ILL.hisD-BSU34910.1~1284	20.2214	-2.10866	0.762404	-2.7658	0.00567828	0.0427083
ILL.hisF-BSU34870.1~759	33.2856	-0.898995	0.60028	-1.49763	0.134231	0.391263
ILL.hisG-BSU34920.1~642	14.2991	-1.06701	0.840676	-1.26923	0.204361	0.495361
ILL.hisH-BSU34890.1~639	14.1585	-1.21006	0.914223	-1.32359	0.185638	0.470609
ILL.hisI-BSU34860.1~630	37.7265	-1.1662	0.611287	-1.90777	0.0564205	0.235219
ILL.hisJ-BSU29620.197~1003	819.515	-0.517517	0.314773	-1.64409	0.100157	0.333636
ILL.hisS-BSU27560.90~1364	2859.8	-0.433141	0.285019	-1.51969	0.128588	0.38383
ILL.hisZ-BSU34930.51~1226	21.5433	-2.15979	0.780248	-2.76809	0.00563866	0.0425682
ILL.hmp-BSU13040.13~1212	66.9194	2.18262	0.485358	4.49694	6.8939e-06	0.000144808
ILL.holA-BSU25560.25~1068	1047.35	0.150459	0.278674	0.53991	0.589259	0.833111
ILL.holB-BSU00310.12~1001	3670.38	0.543659	0.363552	1.49541	0.134807	0.391633
ILL.hom-BSU32260.1~1302	1284.9	-1.40838	0.32431	-4.34271	1.40738e-05	0.000267865
ILL.hpr-BSU09990.41~652	1380.38	-0.4476	0.4426	-1.0113	0.311875	0.616896
ILL.hprK-BSU35000.35~967	2668.31	0.0727436	0.422928	0.172	0.863438	0.956909
ILL.hprP-BSU34970.1~651	2364.48	-0.0758491	0.276223	-0.274594	0.783628	0.932012
ILL.hprT-BSU00680.1~543	4188.28	-0.228226	0.275349	-0.828859	0.407184	0.707251
ILL.hrcA-BSU25490.1~1032	4240.57	0.645006	0.345065	1.86923	0.0615907	0.249716
ILL.hslO-BSU00710.12~887	3756.45	0.364033	0.267828	1.3592	0.174082	0.456466
ILL.hslU-BSU16160.17~1420	9485.44	0.0670363	0.289278	0.231736	0.816743	0.942789
ILL.htpG-BSU39820.83~1963	7413.72	-0.655097	0.304609	-2.15062	0.0315066	0.154074
ILL.htrA-BSU12900.43~1392	847.635	-0.377672	0.281575	-1.34128	0.179828	0.461281
ILL.htrB-BSU33000.1~1377	1297.83	-0.00781247	0.278386	-0.0280634	0.977612	0.995288
ILL.htrC-BSU40360.1~1203	4924.77	1.4598	0.333052	4.3831	1.17e-05	0.000226946
ILL.hutG-BSU39380.1~960	126.584	1.90197	0.420783	4.52006	6.18214e-06	0.000131907
ILL.hutH-BSU39350.1~1527	102.419	3.84336	0.656856	5.85114	4.88212e-09	3.80618e-07
ILL.hutI-BSU39370.13~1278	189.308	1.88938	0.441665	4.27785	1.88705e-05	0.000346158
ILL.hutM-BSU39390.1~1428	69.6859	1.88379	0.461887	4.07846	4.53358e-05	0.000723588
ILL.hutP-BSU39340.3~458	362.068	2.77754	0.922417	3.01116	0.00260253	0.0226896
ILL.hutU-BSU39360.1~1659	211.913	1.91224	0.443406	4.31262	1.61332e-05	0.000302796
ILL.hxlA-BSU03460.8~640	244.533	-0.865383	0.331295	-2.61212	0.00899817	0.0619644
ILL.hxlB-BSU03450.1~558	225.156	-0.411716	0.339503	-1.2127	0.225244	0.518739
ILL.hxlR-BSU03470.135~497	134.949	-0.320695	0.382343	-0.838762	0.401603	0.703282
ILL.icd-BSU29130.1~1272	18831.7	-0.680291	0.397879	-1.7098	0.0873036	0.306963
ILL.ileS-BSU15430.53~2818	19555.7	-0.0693687	0.309033	-0.22447	0.822392	0.945586
ILL.ilvA-BSU21770.23~1291	544.561	-1.52663	0.467347	-3.26659	0.00108852	0.0109333
ILL.ilvB-BSU28310.122~1846	82.2529	-2.05124	0.459778	-4.46138	8.14343e-06	0.0001693
ILL.ilvC-BSU28290.24~1052	60.843	-1.21321	0.526657	-2.3036	0.021245	0.114836
ILL.ilvD-BSU21870.166~1842	228.834	-1.0736	0.541362	-1.98315	0.0473507	0.205745
ILL.ilvH-BSU28300.1~519	17.9721	-2.08514	0.851078	-2.45	0.0142855	0.0860524
ILL.immA-BSU04810.1~510	168.667	-0.718801	0.425357	-1.68988	0.0910514	0.314572
ILL.immR-BSU04820.25~408	296.73	-0.20242	0.409921	-0.493803	0.621445	0.855173
ILL.infA-BSU01390.1~219	15307.6	-0.626442	0.290328	-2.15771	0.0309506	0.152944
ILL.infB-BSU16630.1~2151	24495.3	0.689562	0.290809	2.37118	0.0177312	0.1011
ILL.infC-BSU28870.59~580	29035.2	-0.272525	0.366505	-0.74358	0.457131	0.747644
ILL.iolB-BSU39750.1~816	187.701	0.422359	0.535387	0.788885	0.430179	0.725134
ILL.iolC-BSU39740.1~978	221.585	0.459109	0.527713	0.869999	0.384301	0.687736
ILL.iolD-BSU39730.1~1914	453.629	0.0822315	0.427206	0.192487	0.847361	0.952857
ILL.iolE-BSU39720.1~894	182.385	-0.17265	0.410718	-0.420361	0.674222	0.883132
ILL.iolF-BSU39710.1~1317	284.967	-0.394846	0.395328	-0.998779	0.317902	0.624709
ILL.iolG-BSU39700.1~1035	258.852	-0.395817	0.411521	-0.96184	0.33613	0.646088
ILL.iolH-BSU39690.1~870	219.702	-0.350999	0.396673	-0.884858	0.376233	0.681828
ILL.iolI-BSU39680.86~922	203.552	-0.424327	0.378655	-1.12061	0.262452	0.56206
ILL.iolJ-BSU39670.21~893	235.137	-0.0507119	0.356024	-0.14244	0.886733	0.962983
ILL.iolR-BSU39770.17~772	1008.81	0.0628417	0.340123	0.184762	0.853416	0.955732
ILL.iolS-BSU39780.28~960	2675.71	0.0024516	0.29998	0.00817256	0.993479	0.998069
ILL.iolT-BSU06230.1~1422	98.6299	1.44699	0.685036	2.11228	0.0346627	0.163779
ILL.ipi-BSU11130.4~363	404.96	-0.645255	0.391719	-1.64724	0.0995086	0.332768
ILL.ipk-BSU00460.22~891	2922.07	0.069549	0.437617	0.158927	0.873727	0.96129
ILL.iscS-BSU27510.1~1140	4118.08	0.49444	0.314857	1.57036	0.116331	0.362317
ILL.iscS-BSU29590.84~1229	1475.83	-0.0407687	0.348468	-0.116994	0.906865	0.971384
ILL.iscU-BSU32680.1~444	7951.77	-0.244778	0.264288	-0.926181	0.354352	0.663224
ILL.iseA-BSU18380.25~570	392.052	0.0356839	0.526077	0.0678302	0.945921	0.984382
ILL.ispA-BSU13190.33~992	51.2809	1.73766	0.585853	2.96604	0.00301666	0.02591
ILL.ispA-BSU24280.1~891	1584.94	0.352059	0.366134	0.961558	0.336272	0.646088
ILL.ispD-BSU00900.15~713	968.745	0.307056	0.302904	1.01371	0.310723	0.616699
ILL.ispF-BSU00910.1~477	281.306	-0.519369	0.407839	-1.27347	0.202853	0.493913
ILL.ispG-BSU25070.1~1134	4946.42	-0.070796	0.275348	-0.257114	0.797091	0.935894
ILL.ispH-BSU25160.84~1028	2781.57	0.438522	0.269145	1.62932	0.103246	0.340292
ILL.jag-BSU41030.1~627	11608.9	-0.268497	0.44674	-0.601012	0.547832	0.801772
ILL.kamA-BSU19690.29~1444	8.11669	-1.30231	1.11954	-1.16326	0.244726	0.5416
ILL.kapB-BSU31460.1~387	319.587	0.125548	0.363118	0.345751	0.72953	0.908145
ILL.kapD-BSU31470.15~632	37.1543	-0.297522	0.547124	-0.543793	0.586584	0.831751
ILL.katA-BSU08820.10~1461	2681.17	0.0437983	0.297923	0.147012	0.883123	0.962268
ILL.katE-BSU39050.4~2064	45.9214	0.587513	0.558164	1.05258	0.292534	0.597107
ILL.katX-BSU38630.30~1673	27.322	0.519903	0.645615	0.805284	0.420656	0.717735
ILL.kbaA-BSU01560.110~706	440.648	-0.0480103	0.504614	-0.0951427	0.924201	0.976322
ILL.kbl-BSU17000.1~1179	1797.59	1.19367	0.516483	2.31115	0.0208245	0.113624
ILL.kdgA-BSU22100.2~592	134.995	0.73085	0.472867	1.54557	0.122208	0.371945
ILL.kdgK-BSU22110.1~975	303.073	0.416316	0.321029	1.29682	0.194694	0.482156
ILL.kdgR-BSU22120.34~1053	368.014	0.081108	0.314352	0.258016	0.796394	0.935894
ILL.kdgT-BSU22090.1~993	308.547	0.674921	0.394835	1.70937	0.0873817	0.306972
ILL.kduD-BSU22140.2~766	354.669	0.169437	0.432812	0.39148	0.695443	0.894172
ILL.kduI-BSU22130.51~878	511.11	0.188548	0.411004	0.458749	0.646414	0.870685
ILL.khtS-BSU09870.5~343	194.251	0.435742	0.554533	0.785783	0.431995	0.726683
ILL.khtT-BSU09860.11~508	146.182	-0.0586785	0.497997	-0.117829	0.906203	0.971384
ILL.kinA-BSU13990.51~1871	191.21	-0.452236	0.473584	-0.954923	0.339617	0.649127
ILL.kinB-BSU31450.14~1300	194.797	-0.620092	0.340699	-1.82006	0.0687501	0.265441
ILL.kinC-BSU14490.13~1299	1683.75	0.239138	0.280072	0.853844	0.393192	0.696009
ILL.kinD-BSU13660.1~1521	1547.87	0.030676	0.292478	0.104883	0.916469	0.97497
ILL.kinE-BSU13530.17~2233	202.273	1.42378	0.636649	2.23637	0.0253276	0.132243
ILL.kipA-BSU04090.3~1010	282.842	-0.686404	0.423547	-1.62061	0.105101	0.342785
ILL.kipI-BSU04080.1~723	162.626	-0.429815	0.410251	-1.04769	0.294782	0.59902
ILL.kipR-BSU04100.8~760	217.196	-0.55719	0.399648	-1.3942	0.163256	0.439177
ILL.ksgA-BSU00420.1~879	2891.34	0.0340502	0.490734	0.0693862	0.944682	0.984003
ILL.ktrA-BSU31090.73~741	337.44	-0.0213195	0.566574	-0.0376289	0.969984	0.992006
ILL.ktrB-BSU31100.7~1344	690.82	0.00467639	0.497918	0.00939189	0.992506	0.998069
ILL.ktrC-BSU14510.1~666	1772.94	-0.231917	0.274461	-0.844991	0.398116	0.701417
ILL.ktrD-BSU13500.17~1366	1995.05	-0.00766936	0.436464	-0.0175716	0.985981	0.997795
ILL.lcfA-BSU28560.27~1709	1419.5	1.30286	0.281049	4.63568	3.55757e-06	8.43416e-05
ILL.lctP-BSU03060.1~1626	2966.33	4.5839	1.86761	2.45442	0.0141112	0.0852558
ILL.ldh-BSU03050.54~1019	2249.82	4.50542	1.87032	2.40891	0.0160004	0.0937365
ILL.lepA-BSU25510.24~1862	9965.03	-0.0941085	0.267987	-0.351168	0.725462	0.906285
ILL.leuA-BSU28280.1~1557	57.2536	-2.74833	0.526109	-5.22387	1.75219e-07	7.17513e-06
ILL.leuB-BSU28270.1~1098	51.3134	-1.64442	0.66358	-2.47811	0.013208	0.0814997
ILL.leuC-BSU28260.50~1468	119.904	-1.21068	0.408622	-2.96285	0.00304808	0.0259599
ILL.leuD-BSU28250.1~600	35.4693	-1.46267	0.601243	-2.43274	0.0149849	0.0887873
ILL.leuS-BSU30320.110~2524	14695	0.0904608	0.28222	0.320533	0.748564	0.915117
ILL.levB-BSU34460.1~1551	82.9417	3.10558	0.595105	5.21855	1.80331e-07	7.23825e-06
ILL.levD-BSU27070.11~451	44.7513	1.82042	1.08471	1.67825	0.0932991	0.319574
ILL.levE-BSU27060.1~489	46.0542	1.81288	0.984461	1.8415	0.0655482	0.258495
ILL.levF-BSU27050.12~821	56.3897	1.8114	0.845585	2.14219	0.0321782	0.155669
ILL.levG-BSU27040.21~848	50.9718	1.04269	0.80187	1.30032	0.193491	0.479824
ILL.levR-BSU27080.203~3010	301.891	0.26916	0.311889	0.863	0.388138	0.691653
ILL.lexA-BSU17850.18~635	4119.85	0.535231	0.285619	1.87393	0.0609397	0.247793
ILL.lgt-BSU34990.14~823	2501.39	-0.0582486	0.367211	-0.158624	0.873965	0.96129
ILL.liaF-BSU33100.34~759	561.722	0.21952	0.291827	0.752226	0.451915	0.744439
ILL.liaG-BSU33110.61~933	849.107	0.465353	0.295034	1.57728	0.11473	0.359522
ILL.liaH-BSU33120.27~704	390.069	0.192362	0.314081	0.61246	0.540233	0.799552
ILL.liaI-BSU33130.9~389	130.689	0.245294	0.385325	0.63659	0.524392	0.789689
ILL.liaR-BSU33080.1~636	401.755	0.172291	0.307792	0.559763	0.575641	0.823012
ILL.liaS-BSU33090.1~1083	833.615	0.17218	0.284372	0.605474	0.544864	0.80148
ILL.licA-BSU38570.1~333	88.8803	0.613583	0.737213	0.832301	0.405239	0.706282
ILL.licB-BSU38590.126~434	99.0698	1.44675	0.786359	1.83981	0.0657964	0.25897
ILL.licC-BSU38580.1~1359	368.605	1.36459	0.709459	1.92343	0.0544262	0.229121
ILL.licH-BSU38560.1~1329	506.599	0.476929	0.538555	0.88557	0.375849	0.681436
ILL.licR-BSU38600.63~1988	623.102	-0.846299	0.357183	-2.36937	0.0178183	0.101362
ILL.licT-BSU39080.1~834	819.67	0.701314	0.372057	1.88496	0.0594346	0.242647
ILL.ligA-BSU06620.24~2030	3906.4	-0.529487	0.28639	-1.84883	0.0644822	0.256537
ILL.ligB-BSU20500.59~871	10.8931	0.086016	1.30566	0.0658792	0.947474	0.984382
ILL.ligD-BSU13400.4~1839	103.278	-0.595958	0.406078	-1.4676	0.142214	0.40544
ILL.lipA-BSU32330.39~935	5789.6	-0.56324	0.33763	-1.66822	0.0952724	0.323515
ILL.lipC-BSU04110.64~705	199.215	-0.895336	0.367186	-2.43838	0.0147535	0.0880862
ILL.lmrA-BSU02680.26~592	724.832	0.709078	0.455546	1.55654	0.119579	0.368929
ILL.lmrB-BSU02670.40~1479	1641.3	0.366888	0.52878	0.693838	0.487784	0.766776
ILL.lonA-BSU28200.88~2412	6197.36	-0.449438	0.264542	-1.69893	0.0893319	0.311579
ILL.lonB-BSU28210.1~1659	543.768	3.9792	0.378818	10.5043	8.25749e-26	8.36897e-23
ILL.lpdV-BSU24060.1~1425	3141.05	0.67986	0.445919	1.52463	0.127352	0.381867
ILL.lplA-BSU07100.1~1509	49.365	0.784106	0.600135	1.30655	0.191366	0.47809
ILL.lplB-BSU07110.1~957	29.0758	0.462362	0.737864	0.626622	0.530907	0.793327
ILL.lplC-BSU07120.1~888	29.4073	0.326344	0.686707	0.47523	0.634623	0.863797
ILL.lplD-BSU07130.9~1349	64.382	-0.29602	0.451257	-0.655991	0.51183	0.779474
ILL.lrgB-BSU38330.1~678	1237.29	-0.522968	0.63437	-0.82439	0.409718	0.709774
ILL.lrpA-BSU05050.5~415	315.09	-0.375219	0.495775	-0.756833	0.44915	0.742893
ILL.lrpB-BSU05060.52~501	81.4275	-0.264256	0.640369	-0.412663	0.679854	0.885645
ILL.lrpC-BSU04250.12~446	213.576	-0.321132	0.349026	-0.92008	0.357531	0.665312
ILL.lspA-BSU15450.21~485	1448.38	-0.0797333	0.340842	-0.23393	0.815039	0.942691
ILL.ltaSA-BSU07260.268~2187	14304.2	-0.184463	0.287857	-0.640816	0.521642	0.787318
ILL.luxS-BSU30670.2~475	1788.59	-0.1752	0.340053	-0.515215	0.606403	0.845616
ILL.lysA-BSU23380.1~1320	2839.73	-0.619069	0.325835	-1.89994	0.0574406	0.237416
ILL.lysC-BSU28470.126~1352	1053.54	-0.52218	0.396542	-1.31684	0.187894	0.474888
ILL.lysP-BSU33330.104~1513	2186.86	0.271703	0.717554	0.378652	0.704946	0.895878
ILL.lysS-BSU00820.1~1500	11491.3	0.0711941	0.292682	0.243247	0.807814	0.938898
ILL.lytA-BSU35640.21~329	808.928	-0.323915	0.332507	-0.97416	0.329977	0.638839
ILL.lytB-BSU35630.1~2118	4245.62	-0.382418	0.267607	-1.42903	0.152997	0.424481
ILL.lytC-BSU35620.39~1529	3510.66	-0.385019	0.272274	-1.41409	0.157336	0.430102
ILL.lytD-BSU35780.44~2686	4710.74	-1.22492	0.26472	-4.62723	3.70582e-06	8.68405e-05
ILL.lytE-BSU09420.1~1005	1491.2	0.250675	0.303446	0.826094	0.408751	0.708757
ILL.lytF-BSU09370.153~1619	4176.03	-1.58728	0.29403	-5.39834	6.72596e-08	3.45152e-06
ILL.lytG-BSU31120.21~869	1895.16	0.0868192	0.393671	0.220537	0.825453	0.946153
ILL.lytH-BSU32340.166~1146	107.351	-0.128242	0.413299	-0.31029	0.75634	0.917201
ILL.lytR-BSU35650.39~959	3148.57	-0.135608	0.271917	-0.49871	0.617984	0.853306
ILL.lytS-BSU28930.82~1863	750.771	-0.247058	0.373829	-0.660886	0.508686	0.778487
ILL.lytT-BSU28920.1~726	425.195	-0.74151	0.318057	-2.33137	0.0197337	0.10974
ILL.maa-BSU40850.1~555	140.303	1.59059	0.377844	4.20966	2.5575e-05	0.000448836
ILL.maeN-BSU31580.154~1500	1191.57	0.210052	0.331234	0.634151	0.525983	0.79046
ILL.maf-BSU28050.26~595	1249.88	-0.310508	0.333293	-0.931634	0.351526	0.661138
ILL.malA-BSU08180.1~1350	437.013	-0.258474	0.379256	-0.68153	0.495536	0.769695
ILL.malL-BSU34560.1~1686	169.746	-0.103133	0.375455	-0.274689	0.783555	0.932012
ILL.malP-BSU08200.1~1584	282.208	1.12944	0.516679	2.18595	0.0288189	0.144773
ILL.malQ-BSU08210.1~1722	311.463	-0.0323726	0.329522	-0.0982412	0.921741	0.975649
ILL.malR-BSU08190.11~775	159.295	0.0301846	0.486792	0.0620072	0.950557	0.9847
ILL.malS-BSU29880.82~1782	2387.86	0.185954	0.297358	0.625354	0.531739	0.793635
ILL.manA-BSU12020.1~948	3030.46	-1.98831	0.649252	-3.06247	0.00219521	0.0195591
ILL.manP-BSU12010.1~1953	4805.71	-2.03934	0.645617	-3.15875	0.00158447	0.0148005
ILL.manR-BSU12000.1~1947	2060.65	-0.309143	0.488545	-0.632783	0.526875	0.790508
ILL.mapA-BSU01380.1~747	61550.2	-0.431363	0.307984	-1.4006	0.161333	0.436659
ILL.mbl-BSU36410.10~1011	17365.5	0.113202	0.287583	0.393632	0.693852	0.893544
ILL.mccA-BSU27260.58~981	375.847	-0.674061	0.448252	-1.50376	0.132644	0.390533
ILL.mcpA-BSU31240.1~1986	4052.49	-1.4667	0.345125	-4.24976	2.13997e-05	0.000385576
ILL.mcpB-BSU31260.1~1989	2377.76	-2.11916	0.304811	-6.95236	3.59223e-12	5.39366e-10
ILL.mcpC-BSU13950.3~1970	2413.33	-1.55654	0.351039	-4.43411	9.24548e-06	0.000188348
ILL.mcsA-BSU00840.14~571	918.899	0.491581	0.683325	0.719395	0.471898	0.754962
ILL.mcsB-BSU00850.1~1092	2710.63	0.532604	0.527628	1.00943	0.312768	0.617013
ILL.mdh-BSU29120.44~982	15188	-0.703943	0.398778	-1.76525	0.0775213	0.285613
ILL.mdr-BSU03070.7~1545	4517.3	0.457268	0.38679	1.18221	0.237121	0.529753
ILL.mdxD-BSU34620.1~1770	92.4409	0.731768	0.433097	1.68962	0.0911011	0.314572
ILL.mdxE-BSU34610.1~1254	110.162	0.410605	0.481269	0.853171	0.393564	0.696121
ILL.mdxF-BSU34600.1~1308	95.6545	0.244041	0.486103	0.502037	0.615642	0.851232
ILL.mdxG-BSU34590.1~837	47.5415	0.264947	0.572217	0.463019	0.643351	0.869241
ILL.mdxR-BSU34630.1~951	22.9116	2.66253	0.772384	3.44715	0.000566528	0.00634449
ILL.mecA-BSU11520.28~684	2797.6	0.156837	0.291519	0.537999	0.590577	0.833926
ILL.med-BSU11300.33~986	3676.42	0.192105	0.269607	0.712538	0.476131	0.758324
ILL.melA-BSU30300.1~1299	264.94	0.347596	0.346575	1.00295	0.315886	0.621651
ILL.menA-BSU38490.73~1008	3654.91	0.618536	0.339827	1.82015	0.0687367	0.265441
ILL.menB-BSU30800.35~850	8551.11	-0.103886	0.271466	-0.382683	0.701955	0.895253
ILL.menC-BSU30780.1~1116	1563.12	1.18678	0.289484	4.09962	4.13823e-05	0.000669663
ILL.menD-BSU30820.1~1743	2418.99	-0.089473	0.27558	-0.324671	0.74543	0.914062
ILL.menE-BSU30790.91~1551	2395.31	1.11549	0.311863	3.57686	0.000347747	0.00424628
ILL.menF-BSU30830.82~1497	3892.95	0.035353	0.305031	0.1159	0.907732	0.971384
ILL.metA-BSU21910.73~978	960.502	-0.592197	0.310002	-1.9103	0.0560946	0.234441
ILL.metE-BSU13180.67~2355	210.283	-0.353885	0.417507	-0.847613	0.396653	0.699753
ILL.metK-BSU30550.168~1370	21220.4	0.355434	0.317596	1.11914	0.263081	0.562813
ILL.metN-BSU32730.1~825	6151.78	-0.901717	0.365117	-2.46967	0.0135239	0.0826129
ILL.metP-BSU32740.1~669	1877.5	-0.97702	0.461658	-2.11633	0.0343169	0.162335
ILL.metQ-BSU32750.106~1131	2741.29	-0.922646	0.421779	-2.18751	0.0287054	0.144741
ILL.metS-BSU00380.90~2084	9495.36	0.0952146	0.287224	0.331499	0.740268	0.912133
ILL.mfd-BSU00550.70~3603	9423.71	0.697535	0.292119	2.38785	0.0169474	0.0978036
ILL.mgsA-BSU22480.16~429	536.576	0.212328	0.342907	0.6192	0.535785	0.797383
ILL.mgsR-BSU24770.18~398	36.2716	2.14704	0.784667	2.73624	0.00621461	0.0459745
ILL.mgtE-BSU13300.297~1652	6472.64	0.91681	0.270471	3.38968	0.000699731	0.0075407
ILL.mhqA-BSU12870.16~966	264.732	1.33755	0.353699	3.78159	0.000155827	0.00210574
ILL.mhqR-BSU13670.51~488	1826.16	-0.551027	0.397651	-1.38571	0.165836	0.442886
ILL.miaA-BSU17330.7~951	1071.83	0.228392	0.286874	0.79614	0.425951	0.721908
ILL.minC-BSU28000.1~681	4675.56	-0.646727	0.434131	-1.48971	0.136302	0.393578
ILL.minD-BSU27990.2~808	5482.85	-0.360858	0.294812	-1.22403	0.220942	0.514178
ILL.minJ-BSU35220.21~1214	3437.01	0.0131599	0.347544	0.0378653	0.969795	0.992006
ILL.mleA-BSU23550.16~1335	21605.9	-0.34112	0.271707	-1.25547	0.209308	0.499913
ILL.mleN-BSU23560.40~1446	16919	-0.380166	0.303245	-1.25366	0.209966	0.500413
ILL.mlpA-BSU16710.9~1238	9996.91	2.71308	0.388376	6.98572	2.834e-12	4.59562e-10
ILL.mmgA-BSU24170.1~1182	9.27559	2.72911	1.13771	2.39879	0.0164494	0.0959511
ILL.mmgB-BSU24160.1~864	12.1971	1.85296	0.927861	1.99702	0.0458233	0.201047
ILL.mmgC-BSU24150.1~1140	9.23668	0.92464	1.10101	0.839814	0.401013	0.702856
ILL.mmgD-BSU24140.1~1119	14.2144	0.521791	0.807936	0.645832	0.518388	0.785274
ILL.mmr-BSU37570.1~1401	3503.38	-0.501497	0.390433	-1.28446	0.198979	0.488886
ILL.mmsA-BSU39760.173~1636	568.352	0.639687	0.60394	1.05919	0.289513	0.59367
ILL.mmuM-BSU02410.6~953	129.381	-1.79859	0.529245	-3.3984	0.000677806	0.00738663
ILL.mnaA-BSU35660.20~1162	1808.45	-0.237331	0.275989	-0.859931	0.389827	0.69254
ILL.mnmA-BSU27500.29~1144	4975.19	0.35639	0.316696	1.12534	0.260445	0.559896
ILL.mntA-BSU30770.135~1055	1710.58	1.4228	0.614736	2.31448	0.0206413	0.113038
ILL.mntB-BSU30760.1~753	845.783	1.36164	0.604241	2.25347	0.0242294	0.128568
ILL.mntC-BSU30750.4~1311	1470.79	1.31937	0.622636	2.11901	0.0340897	0.161637
ILL.mntD-BSU30740.1~888	1202.99	1.25374	0.608448	2.06056	0.0393452	0.179421
ILL.mntH-BSU04360.29~1306	9816.86	1.42553	0.52177	2.7321	0.00629319	0.0463023
ILL.mntR-BSU24520.1~429	3054.79	-0.11911	0.3171	-0.375621	0.707199	0.89612
ILL.moaA-BSU36700.16~1041	1684.68	0.255716	0.286244	0.89335	0.37167	0.676886
ILL.moaB-BSU29460.85~597	2066.21	1.64909	0.344039	4.79331	1.64051e-06	4.50362e-05
ILL.moaC-BSU05960.1~513	890.402	0.12161	0.327913	0.370862	0.71074	0.897854
ILL.moaD-BSU14310.1~234	219.391	0.0198922	0.3401	0.0584892	0.953359	0.984956
ILL.moaE-BSU14300.1~474	488.642	0.0636474	0.319736	0.199062	0.842214	0.951981
ILL.mobA-BSU14260.11~610	444.164	0.243383	0.304662	0.798862	0.42437	0.721038
ILL.mobB-BSU14290.1~522	559.319	0.0717736	0.313437	0.228989	0.818878	0.943484
ILL.moeA-BSU14280.18~1310	1357.3	0.27745	0.333109	0.832909	0.404896	0.706157
ILL.moeB-BSU14270.1~1020	986.784	0.201121	0.294863	0.682082	0.495187	0.769695
ILL.motA-BSU13690.22~834	1688.68	-1.36614	0.346142	-3.94676	7.92158e-05	0.00116778
ILL.motB-BSU13680.1~786	2102.76	-1.4213	0.341299	-4.16439	3.12187e-05	0.000527336
ILL.mpr-BSU02240.35~976	265.834	0.37955	0.583965	0.649953	0.515723	0.783636
ILL.mprF-BSU08425.39~2609	3774.72	-0.0367479	0.278184	-0.132099	0.894906	0.964623
ILL.mraW-BSU15140.70~1005	6915.2	0.249515	0.30773	0.810827	0.417465	0.714929
ILL.mraY-BSU15190.112~1086	3806.31	-0.381157	0.282075	-1.35126	0.176612	0.458397
ILL.mreB-BSU28030.1~1014	8266.34	-0.428498	0.379372	-1.12949	0.258689	0.5588
ILL.mreBH-BSU14470.31~1038	86.1627	-0.667589	0.423895	-1.57489	0.115282	0.360611
ILL.mreC-BSU28020.1~873	7062.99	-0.553764	0.404831	-1.36789	0.171347	0.45136
ILL.mreD-BSU28010.1~519	1955.84	-0.795015	0.560256	-1.41902	0.155893	0.427167
ILL.mrgA-BSU32990.1~462	3830.49	-0.435859	0.736038	-0.592169	0.553737	0.805618
ILL.mrnC-BSU00950.4~435	463.579	-0.390216	0.305935	-1.27549	0.202137	0.492763
ILL.mrpA-BSU31600.59~2464	3869.36	-0.170027	0.332752	-0.510972	0.609371	0.846296
ILL.mrpB-BSU31610.1~432	486.727	-0.198355	0.377872	-0.524926	0.599635	0.840334
ILL.mrpC-BSU31620.1~342	284.894	-0.254291	0.35071	-0.725076	0.468406	0.752312
ILL.mrpD-BSU31630.1~1482	1864.13	-0.274537	0.323666	-0.848209	0.396321	0.699472
ILL.mrpE-BSU31640.6~482	554.641	-0.583788	0.334401	-1.74577	0.0808504	0.292911
ILL.mrpF-BSU31650.1~285	305.598	-0.347548	0.333866	-1.04098	0.297884	0.602304
ILL.mrpG-BSU31660.1~375	427.003	-0.380047	0.336713	-1.1287	0.259025	0.558855
ILL.mscL-BSU36360.1~393	762.631	0.0832416	0.429668	0.193735	0.846384	0.952593
ILL.msmE-BSU30270.1~1281	109.387	1.98408	0.700897	2.83077	0.00464367	0.0362725
ILL.msmR-BSU30260.14~1048	337.874	2.43686	0.762515	3.19582	0.00139435	0.0133319
ILL.msmX-BSU38810.1~1098	1852.14	1.04253	0.511384	2.03865	0.0414851	0.18666
ILL.msrA-BSU21690.20~553	457.973	-0.300261	0.313445	-0.957938	0.338094	0.648974
ILL.mstX-BSU31321.47~379	3.79827	1.49402	1.56356	0.955525	0.339312	0.649127
ILL.mta-BSU36600.1~774	78.574	-0.550077	0.439391	-1.25191	0.210604	0.501222
ILL.mtbP-BSU20250.1~1332	1.58843	2.51806	2.64007	0.953787	0.340192	NA
ILL.mtlA-BSU03981.1~1437	295.536	0.256194	0.340748	0.75186	0.452135	0.744499
ILL.mtlD-BSU03990.2~1123	311.879	0.241978	0.312645	0.773971	0.438948	0.733032
ILL.mtlF-BSU03982.1~432	95.8614	-0.0249463	0.419395	-0.0594816	0.952569	0.984956
ILL.mtlR-BSU04160.186~2270	2219.65	0.714867	0.327643	2.18184	0.029121	0.145929
ILL.mtn-BSU27270.21~716	2804.06	-0.0555812	0.290251	-0.191493	0.848139	0.952857
ILL.mtnA-BSU13550.1~1062	47.3844	-1.43955	0.549547	-2.61952	0.00880546	0.0610211
ILL.mtnB-BSU13610.1~630	268.517	0.564099	0.395252	1.42719	0.153525	0.424481
ILL.mtnD-BSU13620.15~551	310.099	0.606813	0.481192	1.26106	0.207286	0.497831
ILL.mtnK-BSU13560.87~1286	37.6781	-1.41992	0.57096	-2.48691	0.0128859	0.080122
ILL.mtnU-BSU13570.1~780	140.255	-0.80263	0.500642	-1.6032	0.10889	0.350691
ILL.mtnW-BSU13590.58~1302	437.596	0.827294	0.425676	1.94348	0.0519578	0.221723
ILL.mtnX-BSU13600.1~708	260.038	0.588552	0.465898	1.26326	0.206495	0.496635
ILL.mtrB-BSU22770.1~228	2323.49	0.977354	0.296089	3.30088	0.000963836	0.00991723
ILL.murAA-BSU36760.34~1344	29806.4	-0.547318	0.326405	-1.67681	0.0935802	0.319932
ILL.murAB-BSU37100.379~1668	11897.5	0.569051	0.291354	1.95313	0.0508047	0.217489
ILL.murB-BSU15230.32~943	3844.38	-0.0588113	0.282219	-0.208389	0.834925	0.950672
ILL.murC-BSU29790.1~1299	11576.1	-0.050169	0.277748	-0.180628	0.85666	0.956192
ILL.murD-BSU15200.1~1356	6660.03	-0.219868	0.281731	-0.780421	0.435143	0.729322
ILL.murE-BSU15180.1~1485	7260.32	-0.204643	0.267289	-0.765627	0.443898	0.738434
ILL.murF-BSU04570.72~1445	5062.75	0.855192	0.269698	3.17093	0.00151954	0.014393
ILL.murG-BSU15220.123~1214	3142.21	-0.111502	0.282362	-0.394892	0.692923	0.893198
ILL.murQ-BSU01700.29~943	578.706	-0.0479615	0.749168	-0.0640197	0.948955	0.9847
ILL.mutL-BSU17050.1~1884	2475.41	0.386402	0.281323	1.37352	0.169591	0.448375
ILL.mutM-BSU29080.23~853	1281.07	0.139562	0.302087	0.461994	0.644086	0.869505
ILL.mutS-BSU17040.1~2577	3120.61	0.4467	0.283296	1.5768	0.114842	0.359522
ILL.mutSB-BSU28580.1~2358	5386.65	0.522852	0.267457	1.9549	0.0505948	0.217049
ILL.mutT-BSU04330.1~450	74.4735	1.25903	0.596707	2.10996	0.0348614	0.164335
ILL.nadA-BSU27850.1~1107	63.7101	2.47983	0.494145	5.01841	5.21004e-07	1.78235e-05
ILL.nadB-BSU27870.28~1623	89.2418	2.47616	0.451333	5.48632	4.10384e-08	2.31069e-06
ILL.nadC-BSU27860.1~870	39.3912	1.9632	0.565104	3.47405	0.000512671	0.0058711
ILL.nadD-BSU25640.12~581	2384.02	-0.0133846	0.399075	-0.0335391	0.973245	0.993087
ILL.nadE-BSU03130.75~893	6665.13	0.455669	0.329174	1.38428	0.166272	0.443466
ILL.nadR-BSU27890.1~543	803.829	-0.0419614	0.28278	-0.148389	0.882036	0.962268
ILL.nagA-BSU35010.14~1204	1313.52	0.475072	0.382605	1.24168	0.214355	0.507124
ILL.nagBA-BSU35020.1~729	670.023	0.559645	0.367545	1.52266	0.127844	0.382494
ILL.nagBB-BSU02360.42~791	945.134	0.0649062	0.308469	0.210414	0.833345	0.950252
ILL.nagP-BSU02350.21~1916	2665.08	0.163245	0.302457	0.539729	0.589384	0.833111
ILL.nagP-BSU07700.15~1373	3702.8	0.809644	0.366316	2.21023	0.0270891	0.138661
ILL.nap-BSU05440.12~914	1524.76	-0.192155	0.279586	-0.687287	0.491902	0.767875
ILL.narG-BSU37280.1~3687	27.789	-0.166517	0.660011	-0.252295	0.800813	0.936694
ILL.narH-BSU37270.1~1464	12.6123	0.181069	0.940175	0.192591	0.847279	0.952857
ILL.narI-BSU37250.1~672	13.1796	0.13878	0.865424	0.160361	0.872597	0.96129
ILL.narJ-BSU37260.1~555	5.51127	-0.189103	1.2276	-0.154043	0.877576	0.962268
ILL.narK-BSU37320.89~1276	64.1573	0.397484	0.482452	0.823883	0.410006	0.709774
ILL.nasA-BSU03330.10~1215	177.427	-0.121025	0.344367	-0.351441	0.725257	0.906285
ILL.nasB-BSU03320.23~2338	20.4311	-1.19111	0.722106	-1.64949	0.099047	0.332398
ILL.nasC-BSU03310.4~2136	12.1128	0.016643	0.886343	0.0187771	0.985019	0.997795
ILL.nasD-BSU03300.1~2418	72.8408	0.109043	0.545031	0.200067	0.841428	0.951981
ILL.nasE-BSU03290.1~321	328.198	0.585456	0.472331	1.2395	0.215159	0.507124
ILL.nasF-BSU03280.1~1452	946.225	-0.0010604	0.28608	-0.00370664	0.997043	0.998767
ILL.natA-BSU02750.12~752	226.23	-0.957788	0.333444	-2.87241	0.00407352	0.0323102
ILL.natA-BSU09890.11~907	1010.86	0.181943	0.285344	0.637627	0.523717	0.788981
ILL.natB-BSU02760.1~1161	354.09	-0.939659	0.324505	-2.89567	0.00378347	0.0306763
ILL.natB-BSU09900.1~1260	2204.18	0.259622	0.313994	0.826839	0.408328	0.708328
ILL.natK-BSU02730.1~957	534.139	0.170116	0.333364	0.510301	0.60984	0.846296
ILL.natR-BSU02740.12~713	401.147	0.24844	0.371282	0.66914	0.503406	0.774207
ILL.ndh-BSU12290.40~1218	31616.3	0.212392	0.272328	0.779914	0.435441	0.729423
ILL.ndhF-BSU01830.1~1518	83.9836	-0.370774	0.605487	-0.612357	0.540301	0.799552
ILL.ndk-BSU22730.1~450	12788.9	0.039906	0.264818	0.150692	0.880219	0.962268
ILL.ndoA-BSU04660.1~351	7213.54	-0.449755	0.265547	-1.69369	0.0903233	0.31404
ILL.nfrA-BSU38110.4~753	1544.47	-0.228182	0.275715	-0.8276	0.407897	0.707883
ILL.nhaC-BSU09680.127~1488	1984.84	0.447831	0.321585	1.39257	0.163748	0.439627
ILL.nhaK-BSU33420.208~2220	1218.81	0.234776	0.307446	0.763633	0.445086	0.739802
ILL.nhaX-BSU09690.21~521	8.96904	2.97168	1.4787	2.00965	0.0444678	0.196375
ILL.nifS-BSU27880.25~1212	256.595	0.236865	0.318935	0.742673	0.45768	0.74771
ILL.nin-BSU03420.2~400	861.814	-0.128794	0.316344	-0.407135	0.683909	0.888358
ILL.noc-BSU40990.10~861	4499.83	-0.127126	0.269292	-0.472077	0.636872	0.864719
ILL.nosA-BSU07630.16~1107	566.254	-0.530414	0.350173	-1.51472	0.129843	0.385913
ILL.nprB-BSU11100.19~1635	82.9234	-0.102393	0.45626	-0.224419	0.822431	0.945586
ILL.nprE-BSU14700.13~1578	624.91	-0.396283	0.400899	-0.988486	0.322914	0.6307
ILL.nrdE-BSU17380.1~2103	7251.09	-0.174987	0.441961	-0.395935	0.692153	0.892772
ILL.nrdEB-BSU20060.1~3507	37.853	-0.371153	0.611318	-0.607136	0.54376	0.8014
ILL.nrdF-BSU17390.18~1007	4596.07	-0.0722909	0.35771	-0.202093	0.839844	0.951782
ILL.nrdF-BSU20040.1~1798	30.9405	-0.269324	0.733654	-0.3671	0.713545	0.899754
ILL.nrdI-BSU17370.9~401	1039.35	-0.301373	0.532164	-0.566317	0.571178	0.819666
ILL.nrdI-BSU20070.1~390	0.307464	1.70915	4.96731	0.34408	0.730786	NA
ILL.nrdR-BSU29000.162~620	1302.77	0.348422	0.275029	1.26685	0.205207	0.495698
ILL.nrnA-BSU29250.1~942	2867.33	0.179771	0.278297	0.645967	0.518301	0.785274
ILL.nsrR-BSU09380.16~456	736.428	-0.210384	0.307598	-0.683958	0.494002	0.76908
ILL.ntdA-BSU10550.104~1429	25.0236	-1.13107	0.912311	-1.23978	0.215056	0.507124
ILL.ntdB-BSU10540.1~849	29.2378	-1.20698	0.6609	-1.82627	0.0678097	0.26415
ILL.ntdC-BSU10530.1~1053	66.9122	-0.716845	0.509549	-1.40682	0.15948	0.433914
ILL.nth-BSU22340.1~660	1999.17	0.725066	0.279603	2.5932	0.00950881	0.0640814
ILL.nucA-BSU03430.28~471	1305.33	-0.285964	0.290315	-0.985011	0.324619	0.631783
ILL.nucB-BSU25750.1~411	21.4263	0.0571912	0.86696	0.0659675	0.947404	0.984382
ILL.nudF-BSU23610.28~585	831.769	0.605037	0.424587	1.425	0.154157	0.424559
ILL.nupC-BSU39410.75~1256	5027.27	0.418781	0.330723	1.26626	0.20542	0.495698
ILL.nusA-BSU16600.35~1150	99727.2	0.295491	0.271693	1.08759	0.276776	0.580398
ILL.nusB-BSU24320.260~655	4381.09	0.0764006	0.325543	0.234686	0.814452	0.942691
ILL.nusG-BSU01010.171~704	5411.17	-0.764744	0.416751	-1.83502	0.0665033	0.260739
ILL.oatA-BSU27140.86~1990	198.542	-0.213307	0.349954	-0.60953	0.542173	0.799726
ILL.obgE-BSU27920.34~1320	8657.02	1.42109	0.306037	4.64353	3.42499e-06	8.29054e-05
ILL.odhB-BSU19360.16~1269	42264	-0.0690991	0.309961	-0.222928	0.823592	0.946129
ILL.ogt-BSU13540.1~498	465.126	0.436296	0.330069	1.32183	0.186224	0.470962
ILL.ohrA-BSU13140.6~431	362.146	0.642199	0.338363	1.89796	0.0577013	0.237967
ILL.ohrB-BSU13160.59~469	34.6866	1.23005	0.645146	1.90662	0.0565701	0.235219
ILL.ohrR-BSU13150.16~459	367.231	0.450184	0.335489	1.34187	0.179637	0.461281
ILL.oppA-BSU11430.137~1774	3092.26	-1.73551	0.498675	-3.48025	0.000500945	0.00578585
ILL.oppB-BSU11440.108~1043	351.016	-1.79776	0.497409	-3.61425	0.000301222	0.0037924
ILL.oppC-BSU11450.1~918	379.366	-2.05544	0.420136	-4.89233	9.96504e-07	2.97046e-05
ILL.oppD-BSU11460.5~1081	507.12	-2.33391	0.386718	-6.03518	1.58781e-09	1.53261e-07
ILL.oppF-BSU11470.2~919	512.715	-2.50214	0.311353	-8.03635	9.25529e-16	3.12674e-13
ILL.opuAA-BSU02980.22~1278	1861.05	-1.94959	0.633532	-3.07733	0.00208864	0.0186506
ILL.opuAB-BSU02990.2~850	1300.37	-1.68225	0.506125	-3.32379	0.000888016	0.00924717
ILL.opuAC-BSU03000.1~882	1945.48	-1.66003	0.424761	-3.90816	9.30026e-05	0.00134655
ILL.opuBA-BSU33730.53~1198	75.5784	-1.04797	0.79906	-1.31151	0.189686	0.476748
ILL.opuBB-BSU33720.10~663	35.1955	-1.06324	0.694088	-1.53185	0.12556	0.378737
ILL.opuBC-BSU33710.1~921	75.6274	-0.662377	0.651181	-1.01719	0.309062	0.616094
ILL.opuBD-BSU33700.11~691	68.373	-0.854095	0.489074	-1.74635	0.0807498	0.292808
ILL.opuCA-BSU33830.29~1171	452.095	-0.608575	0.306662	-1.98452	0.0471984	0.205303
ILL.opuCB-BSU33820.23~676	218.518	-0.155241	0.387997	-0.400109	0.689076	0.891074
ILL.opuCC-BSU33810.1~912	309.74	-0.428599	0.326231	-1.31379	0.188917	0.476584
ILL.opuCD-BSU33800.18~707	299.178	-0.27708	0.358816	-0.772205	0.439993	0.734348
ILL.opuD-BSU30070.1~1539	2049.69	0.162182	0.26968	0.601386	0.547583	0.801697
ILL.opuE-BSU06660.109~1587	272.644	-0.598363	0.679881	-0.880101	0.378805	0.685
ILL.oxdC-BSU33240.13~1170	70.6451	0.336561	0.496609	0.677718	0.49795	0.772261
ILL.pabA-BSU00750.14~598	945.025	0.0476076	0.388749	0.122464	0.902532	0.969749
ILL.pabB-BSU00740.79~1491	1239.84	0.062066	0.346766	0.178985	0.85795	0.956192
ILL.pabC-BSU00760.1~882	1047.08	0.208066	0.322352	0.645461	0.518628	0.785274
ILL.padC-BSU34400.23~508	49.3521	-0.833686	0.531264	-1.56925	0.11659	0.362362
ILL.padR-BSU08340.61~609	845.104	-0.09749	0.280321	-0.347779	0.728006	0.907545
ILL.paiA-BSU32150.128~646	423.669	2.87549	0.402436	7.14521	8.98615e-13	1.58391e-10
ILL.paiB-BSU32140.1~624	645.428	2.30653	0.345826	6.66964	2.56428e-11	3.00119e-09
ILL.panB-BSU22430.120~953	6413.23	0.267328	0.286586	0.932804	0.350921	0.661138
ILL.panC-BSU22420.1~861	5976.75	0.272734	0.301833	0.903592	0.366212	0.672354
ILL.panD-BSU22410.2~385	2307.63	0.46144	0.320617	1.43923	0.150086	0.419331
ILL.parA-BSU40970.30~791	2817.55	0.212222	0.446626	0.475167	0.634668	0.863797
ILL.parB-BSU40960.1~849	3197.8	-0.159114	0.346758	-0.458861	0.646334	0.870685
ILL.parC-BSU18100.4~2424	5125	-0.128632	0.286663	-0.448723	0.653632	0.875074
ILL.parE-BSU18090.264~2231	3540.81	-0.229307	0.283049	-0.810132	0.417864	0.715079
ILL.patA-BSU14000.1~1182	5070.63	-0.00534837	0.281113	-0.0190257	0.984821	0.997795
ILL.patB-BSU31440.57~1220	2239.56	0.111768	0.280237	0.398835	0.690015	0.89115
ILL.pbpA-BSU25000.40~2190	9187.81	0.226056	0.319432	0.707683	0.479142	0.760549
ILL.pbpB-BSU15160.1~2151	7275.67	0.068745	0.384423	0.178826	0.858074	0.956192
ILL.pbpC-BSU04140.151~2157	9471.08	-0.554282	0.276105	-2.00751	0.0446959	0.196739
ILL.pbpD-BSU31490.1~1875	4914.74	0.0648153	0.265274	0.244333	0.806973	0.938459
ILL.pbpE-BSU34440.6~1361	528.171	-2.77337	0.637527	-4.35019	1.36017e-05	0.000260101
ILL.pbpF-BSU10110.1~2145	691.257	-0.45145	0.290544	-1.55381	0.120229	0.36981
ILL.pbpG-BSU37510.1~2076	27.1267	-0.593436	0.63667	-0.932094	0.351288	0.661138
ILL.pbpH-BSU13980.87~2144	1893.45	-0.772739	0.294496	-2.62394	0.00869192	0.0603374
ILL.pbpI-BSU27310.40~1794	344.963	-0.101146	0.422746	-0.23926	0.810904	0.941141
ILL.pbpX-BSU16950.28~1203	2785.28	-0.755935	0.460644	-1.64104	0.100789	0.334646
ILL.pbuE-BSU05800.1~1167	4645.7	1.11065	0.379953	2.92313	0.00346537	0.0287293
ILL.pbuG-BSU06370.135~1457	7361.36	0.520584	0.433206	1.2017	0.229479	0.522934
ILL.pbuO-BSU29990.88~1386	2536.08	-0.233185	0.4728	-0.493199	0.621872	0.855463
ILL.pbuX-BSU22060.1~1317	1066.24	0.697092	0.429337	1.62365	0.104451	0.341486
ILL.pckA-BSU30560.27~1610	2387.98	6.0792e-05	0.375811	0.000161762	0.999871	0.999871
ILL.pcp-BSU02650.1~648	179.701	0.00820426	0.445972	0.0183964	0.985323	0.997795
ILL.pcrA-BSU06610.1~2220	2719.28	-0.552438	0.315698	-1.74989	0.080137	0.291628
ILL.pcrB-BSU06600.23~709	648.726	-0.474683	0.332557	-1.42737	0.153473	0.424481
ILL.pdaA-BSU07980.31~822	295.164	0.91017	0.466818	1.94973	0.0512083	0.218986
ILL.pdeH-BSU31740.26~1255	2396.16	0.247066	0.295987	0.834718	0.403876	0.705435
ILL.pdhA-BSU14580.208~1323	59911	-0.321905	0.268887	-1.19718	0.231238	0.525176
ILL.pdhB-BSU14590.1~978	38051.6	-0.176201	0.273596	-0.644021	0.519562	0.785934
ILL.pdhC-BSU14600.1~1329	60042.2	-0.220254	0.262522	-0.838994	0.401473	0.703282
ILL.pdhD-BSU14610.1~1413	58386.3	-0.166694	0.292416	-0.570058	0.568638	0.81797
ILL.pdp-BSU39400.30~1331	6932.71	0.459282	0.309302	1.4849	0.137571	0.396102
ILL.pel-BSU07560.41~1303	5644.52	-0.219381	0.295205	-0.743148	0.457392	0.747688
ILL.pelB-BSU18650.1~1038	24.3646	0.253688	0.667581	0.38001	0.703938	0.895439
ILL.pelC-BSU34950.141~806	363.502	0.968886	0.30466	3.18022	0.00147164	0.013972
ILL.penP-BSU18800.1~921	1581.6	-0.916403	0.303603	-3.01843	0.00254091	0.022248
ILL.pepF-BSU11540.1~2013	3332.49	-0.476386	0.273517	-1.74171	0.0815599	0.294429
ILL.pepT-BSU38920.1~1233	2259.67	-0.505995	0.316942	-1.59649	0.110379	0.354015
ILL.perR-BSU08730.1~438	4536.32	0.529299	0.34469	1.53558	0.124642	0.376716
ILL.pfkA-BSU29190.184~1143	19421.4	0.413778	0.262017	1.57921	0.114289	0.359446
ILL.pgcA-BSU09310.1~1746	7379.71	-0.136982	0.266473	-0.514057	0.607212	0.845616
ILL.pgcM-BSU34550.1~681	98.5473	-0.049528	0.483057	-0.10253	0.918336	0.975356
ILL.pgdS-BSU35860.14~1255	2471.86	-2.13624	0.32012	-6.67325	2.50202e-11	3.00119e-09
ILL.pgi-BSU31350.11~1363	21607.7	-0.444079	0.306256	-1.45002	0.147052	0.414279
ILL.pgk-BSU33930.317~1501	40882.1	0.382274	0.292762	1.30575	0.191637	0.47809
ILL.pgm-BSU33910.1~1536	40990.3	0.450021	0.334042	1.3472	0.177916	0.459701
ILL.pgsA-BSU16920.50~631	1560.64	0.261782	0.27223	0.961621	0.33624	0.646088
ILL.pgsA-BSU35880.19~1161	107.969	-0.155363	0.390333	-0.398026	0.690611	0.891352
ILL.pgsB-BSU35900.74~1255	71.1261	-0.507611	0.466398	-1.08836	0.276435	0.580398
ILL.pgsC-BSU35890.15~464	20.6757	-0.0321959	0.699719	-0.0460126	0.9633	0.989665
ILL.pgsE-BSU35870.1~168	18.292	-0.0837293	0.974381	-0.0859308	0.931521	0.979528
ILL.pheA-BSU27900.1~858	1800.98	0.838882	0.334693	2.50642	0.012196	0.0771336
ILL.pheB-BSU27910.51~494	1075.74	0.568526	0.298279	1.90602	0.0566473	0.235219
ILL.pheS-BSU28640.298~1332	4689.49	0.193557	0.269186	0.719046	0.472113	0.755008
ILL.pheT-BSU28630.1~2415	7817.48	0.268433	0.287965	0.932174	0.351247	0.661138
ILL.phoA-BSU09410.106~1491	196.189	-0.297223	0.441782	-0.672782	0.501086	0.772943
ILL.phoB-BSU05740.264~1652	95.2098	-0.804502	0.450284	-1.78665	0.0739936	0.277237
ILL.phoD-BSU02620.19~1770	47.9655	1.25127	0.522475	2.39489	0.0166252	0.096837
ILL.phoE-BSU10340.11~592	676.31	-0.305875	0.287499	-1.06391	0.287367	0.591364
ILL.phoH-BSU25340.1~960	5820.08	-0.569523	0.268544	-2.12078	0.0339405	0.161637
ILL.phoP-BSU29110.57~779	898.345	0.218073	0.477379	0.456812	0.647806	0.871674
ILL.phoR-BSU29100.1~1740	2517.51	-0.0329528	0.327201	-0.100711	0.91978	0.975649
ILL.phrA-BSU12440.1~135	26.1303	0.487282	1.05917	0.460059	0.645474	0.87051
ILL.phrC-BSU03780.1~123	104.452	1.13306	0.79386	1.42727	0.153501	0.424481
ILL.phrE-BSU25840.1~135	49.339	0.690717	0.660323	1.04603	0.295548	0.60002
ILL.phrF-BSU37470.1~120	160.032	0.309009	0.764185	0.404364	0.685945	0.889631
ILL.phrG-BSU40310.1~117	0.564104	0.198471	4.39537	0.0451546	0.963984	NA
ILL.phrH-BSU06839.1~174	35.6588	-0.809713	0.698346	-1.15947	0.246264	0.543766
ILL.phrI-BSU05020.1~120	10.701	-1.28717	1.15091	-1.1184	0.263397	0.562998
ILL.phrK-BSU18920.1~123	14.2974	0.598989	0.982692	0.609539	0.542167	0.799726
ILL.phy-BSU19800.6~1154	20.7005	0.4331	0.727966	0.594945	0.55188	0.804503
ILL.pit-BSU12840.1~1002	12481.2	-0.0847319	0.343477	-0.246689	0.805149	0.937432
ILL.pksA-BSU17080.1~618	455.498	0.518315	0.295893	1.7517	0.079826	0.290759
ILL.pksB-BSU17090.54~731	77.3524	-0.470223	0.475326	-0.989263	0.322534	0.6307
ILL.pksC-BSU17100.282~1148	280.018	-0.075301	0.419145	-0.179654	0.857424	0.956192
ILL.pksD-BSU17110.504~1478	88.5897	-0.663256	0.485936	-1.3649	0.172284	0.453237
ILL.pksE-BSU17120.1~2304	44.6209	-1.33036	0.861077	-1.54499	0.122348	0.372091
ILL.pksF-BSU17140.1~1248	3.26254	-2.42725	1.82251	-1.33182	0.182919	0.466385
ILL.pksG-BSU17150.1~1263	3.71174	-0.147602	1.4517	-0.101675	0.919015	0.975566
ILL.pksH-BSU17160.1~780	5.40405	-0.0369608	1.3029	-0.0283681	0.977369	0.995288
ILL.pksI-BSU17170.1~750	3.39883	-0.794064	1.55152	-0.511797	0.608793	0.846296
ILL.pksJ-BSU17180.1~15132	150.142	-0.919627	0.46418	-1.98119	0.0475702	0.206036
ILL.pksL-BSU17190.1~13617	293.184	-0.842745	0.38483	-2.18991	0.0285305	0.144038
ILL.pksM-BSU17200.1~12789	424.455	-0.568937	0.335593	-1.69532	0.090015	0.313506
ILL.pksN-BSU17210.14~16480	367.802	-0.840647	0.362559	-2.31865	0.0204141	0.112364
ILL.pksR-BSU17220.15~7646	358.985	-0.836747	0.307388	-2.72212	0.00648644	0.0475516
ILL.pksS-BSU17230.82~1299	1442.74	-0.564215	0.292237	-1.93067	0.0535233	0.226489
ILL.plsC-BSU09540.25~624	3222.97	-0.0425953	0.427434	-0.0996536	0.920619	0.975649
ILL.plsX-BSU15890.1~1002	5829.38	0.0796121	0.505474	0.1575	0.874851	0.961672
ILL.pnbA-BSU34390.13~1482	469.382	-0.0231196	0.366069	-0.0631565	0.949642	0.9847
ILL.pncA-BSU31760.1~552	1542.66	-0.376663	0.298875	-1.26027	0.207571	0.497926
ILL.pnpA-BSU16690.173~2290	38846.8	0.535387	0.374724	1.42875	0.153076	0.424481
ILL.polA-BSU29090.47~2689	3433.56	0.274252	0.32129	0.853595	0.393329	0.696009
ILL.polC-BSU16580.109~4422	14785.8	1.04493	0.268708	3.88873	0.000100768	0.00144863
ILL.ponA-BSU22320.1~2745	10359.2	-0.26949	0.275431	-0.978431	0.327861	0.635956
ILL.ppaC-BSU40550.26~955	16770.5	0.0760233	0.275501	0.275946	0.782589	0.932012
ILL.ppiB-BSU23360.39~470	6475.79	0.331441	0.309423	1.07116	0.284099	0.588155
ILL.ppnK-BSU11610.1~801	1701.27	-0.406481	0.366419	-1.10933	0.267286	0.567913
ILL.ppnK-BSU29540.58~861	1764.22	-0.45308	0.372864	-1.21513	0.224315	0.518218
ILL.pps-BSU18830.27~2627	917.605	-0.654175	0.301834	-2.16733	0.0302095	0.150269
ILL.ppsA-BSU18340.84~7769	239.479	-1.56716	0.416865	-3.75939	0.00017033	0.00227894
ILL.ppsB-BSU18330.1~7683	188.52	-1.76141	0.376987	-4.67233	2.97799e-06	7.40661e-05
ILL.ppsC-BSU18320.17~7684	268.963	-1.03658	0.321498	-3.22422	0.00126315	0.012366
ILL.ppsD-BSU18310.1~10812	464.437	-0.916455	0.309129	-2.96464	0.00303039	0.0259182
ILL.ppsE-BSU18300.1~3840	197.494	-0.592704	0.378662	-1.56526	0.117523	0.363856
ILL.prfA-BSU37010.25~1095	10291	-0.0902052	0.321102	-0.280923	0.778769	0.931664
ILL.prfB-BSU35290.10~1111	8600.98	0.000861392	0.270756	0.00318143	0.997462	0.99894
ILL.priA-BSU15710.1~2418	2834.77	1.10977	0.274266	4.04633	5.20278e-05	0.000808125
ILL.prkA-BSU08970.1~1896	65.599	0.709797	0.458885	1.54678	0.121915	0.371333
ILL.prkC-BSU15770.1~1947	5773.18	0.382116	0.284413	1.34353	0.179101	0.461001
ILL.prmA-BSU25450.1~936	4013.09	-0.128749	0.396883	-0.3244	0.745635	0.914062
ILL.prmC-BSU37000.1~867	1907.1	0.951382	0.414605	2.29467	0.0217518	0.116797
ILL.proA-BSU13130.12~1259	2765.73	-1.14337	0.268103	-4.26466	2.00207e-05	0.000363964
ILL.proB-BSU13120.53~1150	1377.44	-1.1877	0.343502	-3.45762	0.000544976	0.00614687
ILL.proG-BSU12910.10~828	339.37	-0.0654039	0.334877	-0.195307	0.845152	0.952179
ILL.proH-BSU18480.1~894	451.957	-1.28149	0.498373	-2.57134	0.0101307	0.0674379
ILL.proI-BSU23800.267~1103	1548.12	1.78314	0.355495	5.01593	5.27783e-07	1.78303e-05
ILL.proJ-BSU18470.1~1116	632.236	-1.24744	0.546995	-2.28053	0.0225764	0.120702
ILL.proS-BSU16570.33~1727	18788.9	0.947373	0.263849	3.59059	0.000329932	0.00407788
ILL.prpB-BSU24120.18~923	165.782	0.456053	0.421808	1.08119	0.279614	0.583704
ILL.prpC-BSU15760.1~765	1997.73	0.376102	0.31481	1.1947	0.232206	0.525868
ILL.prpD-BSU24130.15~1433	68.5802	1.02818	0.446533	2.30258	0.0213023	0.114993
ILL.prs-BSU00510.1~954	9705.37	-0.488904	0.264563	-1.84797	0.0646068	0.25678
ILL.prsA-BSU09950.3~881	13382.4	-0.204047	0.291035	-0.701109	0.483235	0.762567
ILL.prsW-BSU22940.1~657	1051.01	0.342931	0.335299	1.02276	0.30642	0.613445
ILL.psd-BSU02290.1~792	2152.35	-0.0499213	0.356286	-0.140116	0.888569	0.963639
ILL.pspA-BSU06180.31~714	671.702	-1.56302	0.577029	-2.70874	0.00675397	0.0490691
ILL.pssA-BSU02270.1~534	1271.21	-0.129465	0.308838	-0.419202	0.675069	0.883652
ILL.pstA-BSU24970.1~885	14.0152	0.669654	0.836801	0.800255	0.423563	0.720325
ILL.pstBA-BSU24960.1~810	15.4035	0.900303	0.843565	1.06726	0.285854	0.589148
ILL.pstBB-BSU24950.11~793	20.787	0.71697	0.746398	0.960573	0.336767	0.646733
ILL.pstC-BSU24980.1~930	13.5151	1.58089	0.91167	1.73406	0.0829072	0.296913
ILL.pstS-BSU24990.106~1008	22.0756	1.03445	0.747556	1.38378	0.166426	0.443585
ILL.ptb-BSU24090.10~909	1858.21	1.18452	0.574067	2.06339	0.0390757	0.178393
ILL.pth-BSU00530.107~673	1610.57	0.0916738	0.299088	0.306511	0.759215	0.918234
ILL.ptkA-BSU36250.1~714	653.582	-0.613592	0.296228	-2.07135	0.0383259	0.176265
ILL.ptsG-BSU13890.229~2328	110718	-0.0119776	0.298439	-0.0401342	0.967986	0.992006
ILL.ptsH-BSU13900.6~272	14024.6	-0.0481159	0.272553	-0.176538	0.859871	0.956383
ILL.ptsI-BSU13910.1~1713	127535	0.00182695	0.295434	0.00618395	0.995066	0.998746
ILL.pucA-BSU32510.57~1049	2.48613	-0.397954	2.11991	-0.187722	0.851095	0.9546
ILL.pucB-BSU32500.1~618	1.02537	-1.37965	2.97531	-0.463698	0.642864	NA
ILL.pucC-BSU32490.1~834	2.78377	0.3271	1.6733	0.195481	0.845016	0.952179
ILL.pucD-BSU32480.1~2238	29.9588	-0.782996	0.642685	-1.21832	0.223102	0.516538
ILL.pucE-BSU32470.1~522	7.82938	-0.583451	1.26798	-0.460143	0.645413	0.87051
ILL.pucG-BSU32520.16~1266	103.757	-0.086442	0.428416	-0.201771	0.840096	0.951782
ILL.pucH-BSU32410.1~1341	116.269	-0.0836756	0.393105	-0.212858	0.831438	0.949616
ILL.pucI-BSU36470.181~1653	39.3907	0.310632	0.551596	0.56315	0.573333	0.821623
ILL.pucJ-BSU32430.96~1445	56.6973	-0.467518	0.597996	-0.781808	0.434328	0.729095
ILL.pucK-BSU32440.6~1298	29.4356	-1.00142	0.609834	-1.64212	0.100565	0.334448
ILL.pucL-BSU32450.13~1497	59.4753	-1.16093	0.476244	-2.43769	0.0147816	0.0881247
ILL.pucM-BSU32460.1~345	33.4664	-0.287665	0.56804	-0.506417	0.612564	0.848713
ILL.pucR-BSU32420.68~1663	161.351	-0.746555	0.392071	-1.90413	0.0568932	0.235833
ILL.pupG-BSU23490.1~816	12612.6	0.609228	0.263668	2.31059	0.0208555	0.11364
ILL.purA-BSU40420.45~1337	16466.8	-0.130217	0.293345	-0.443905	0.657111	0.875157
ILL.purB-BSU06440.1~1296	1997.98	-0.255789	0.470428	-0.543737	0.586623	0.831751
ILL.purC-BSU06450.51~776	220.866	-1.70691	0.452674	-3.77073	0.000162768	0.00218497
ILL.purD-BSU06530.11~1279	615.857	-1.11555	0.361038	-3.08985	0.00200256	0.0180008
ILL.purE-BSU06420.141~629	495.536	-0.29109	0.536513	-0.54256	0.587433	0.832094
ILL.purF-BSU06490.1~1431	518.838	-1.4205	0.372263	-3.81585	0.000135718	0.00187142
ILL.purH-BSU06520.1~1539	563.69	-1.40462	0.348179	-4.03419	5.47918e-05	0.000841386
ILL.purK-BSU06430.1~1143	1282.71	-0.596198	0.517718	-1.15159	0.24949	0.547612
ILL.purL-BSU06480.1~2229	661.967	-1.62096	0.291954	-5.55209	2.8228e-08	1.70801e-06
ILL.purM-BSU06500.102~1142	292.929	-1.42236	0.373387	-3.80934	0.00013934	0.00190839
ILL.purN-BSU06510.1~588	162.992	-1.36296	0.426914	-3.1926	0.00141	0.0134497
ILL.purQ-BSU06470.1~684	199.682	-1.66752	0.359325	-4.64069	3.47254e-06	8.29054e-05
ILL.purR-BSU00470.1~858	3887.27	-0.0648166	0.414983	-0.156191	0.875882	0.961937
ILL.purS-BSU06460.1~255	49.6009	-1.83733	0.519378	-3.53757	0.000403831	0.00482929
ILL.purT-BSU02230.15~1169	1610.69	-0.688919	0.420928	-1.63667	0.1017	0.336984
ILL.purU-BSU13110.1~903	4661.79	0.21282	0.33602	0.633355	0.526502	0.79046
ILL.pycA-BSU14860.1~3447	45640.2	1.2211	0.26777	4.56025	5.1093e-06	0.000113186
ILL.pyk-BSU29180.23~1780	43259.8	0.524948	0.290038	1.80993	0.070307	0.270422
ILL.pyrAA-BSU15510.1~1095	4837.13	1.05166	0.753266	1.39613	0.162674	0.438194
ILL.pyrB-BSU15490.31~945	2700.21	0.586639	0.529524	1.10786	0.267922	0.568362
ILL.pyrC-BSU15500.1~1287	4434.13	0.7652	0.662938	1.15426	0.248395	0.547274
ILL.pyrD-BSU15540.1~936	4065.22	0.962667	0.766525	1.25588	0.209158	0.499913
ILL.pyrE-BSU15560.1~651	3307.23	0.661645	0.645036	1.02575	0.305011	0.611227
ILL.pyrF-BSU15550.1~720	2823.45	0.813838	0.720175	1.13006	0.258452	0.5588
ILL.pyrG-BSU37150.131~1738	25882.8	0.162007	0.270691	0.598494	0.54951	0.80217
ILL.pyrH-BSU16510.146~868	17730.1	0.0116891	0.303538	0.0385095	0.969281	0.992006
ILL.pyrK-BSU15530.1~771	4247.21	1.18968	0.791154	1.50373	0.13265	0.390533
ILL.pyrP-BSU15480.53~1360	14271.3	0.140229	0.335895	0.41748	0.676327	0.884458
ILL.pyrR-BSU15470.27~572	9316.74	-0.188477	0.423449	-0.4451	0.656248	0.875157
ILL.qcrA-BSU22560.1~504	678.7	1.2228	0.458721	2.66566	0.00768367	0.0544573
ILL.qcrB-BSU22550.2~676	1182.63	0.956609	0.456213	2.09685	0.036007	0.168754
ILL.qcrC-BSU22540.1~768	1326.66	0.958414	0.41693	2.29874	0.0215197	0.115858
ILL.qodI-BSU39980.2~1015	46.4107	0.688858	0.53261	1.29336	0.195886	0.48422
ILL.qoxA-BSU38170.258~1223	23126.3	-0.452187	0.26976	-1.67625	0.0936885	0.319932
ILL.qoxB-BSU38160.28~1977	46677.1	-0.35739	0.29766	-1.20067	0.229881	0.523266
ILL.qoxC-BSU38150.14~628	14062.4	-0.346316	0.292056	-1.18578	0.235708	0.528268
ILL.qoxD-BSU38140.2~376	9150.44	-0.156903	0.340957	-0.460184	0.645384	0.87051
ILL.queA-BSU27720.1~1029	3438.76	0.0762905	0.26726	0.285454	0.775296	0.929072
ILL.queC-BSU13720.130~789	1517.94	1.18614	0.341301	3.47536	0.000510171	0.00585901
ILL.queD-BSU13730.1~450	922.278	1.14064	0.335758	3.39721	0.000680774	0.00739908
ILL.queE-BSU13740.1~732	2179.76	1.19795	0.313135	3.82567	0.000130415	0.00181062
ILL.racA-BSU37030.1~555	354.556	-0.00702403	0.31625	-0.0222104	0.98228	0.997674
ILL.racE-BSU28390.1~819	4323.9	0.539797	0.274007	1.97001	0.048837	0.210623
ILL.racX-BSU34430.16~699	312.603	-2.4552	0.541701	-4.53239	5.83209e-06	0.000126435
ILL.radA-BSU00870.88~1464	1204.38	0.53884	0.447839	1.2032	0.228899	0.522934
ILL.radC-BSU28040.1~696	1170.2	-0.370626	0.311812	-1.18862	0.234589	0.527176
ILL.rapA-BSU12430.21~1157	908.167	0.566881	0.34449	1.64557	0.0998527	0.333391
ILL.rapB-BSU36690.20~1153	2168.71	-0.0622419	0.276678	-0.224961	0.822009	0.945586
ILL.rapC-BSU03770.1~1149	2976.58	0.260198	0.342113	0.760562	0.446919	0.741995
ILL.rapD-BSU36380.17~1081	805.64	-0.617588	0.3543	-1.74312	0.0813124	0.293797
ILL.rapE-BSU25830.1~1128	20.4644	-0.77608	0.76004	-1.0211	0.307205	0.614106
ILL.rapF-BSU37460.1~1146	1471.23	0.00516252	0.389596	0.013251	0.989428	0.998069
ILL.rapG-BSU40300.1~1098	790.783	-0.742144	0.349545	-2.12317	0.0337393	0.161486
ILL.rapH-BSU06830.1~1131	306.973	-1.20802	0.341797	-3.53433	0.000408805	0.00487277
ILL.rapI-BSU05010.50~1225	107.141	-1.62153	0.557128	-2.91051	0.00360837	0.0294332
ILL.rapJ-BSU02820.6~1127	1950.45	0.24608	0.279236	0.881261	0.378177	0.684432
ILL.rapK-BSU18910.10~1125	185.728	-1.47832	0.407563	-3.62722	0.000286485	0.0036181
ILL.rbfA-BSU16650.17~370	4499.85	0.797312	0.281959	2.82776	0.00468743	0.0365005
ILL.rbfK-BSU29300.1~693	1.90131	-1.44379	2.53417	-0.569728	0.568862	NA
ILL.rbgA-BSU16050.44~892	4813.61	0.953085	0.425733	2.23869	0.0251759	0.131865
ILL.rbsA-BSU35940.1~1482	13563.6	2.17269	0.675335	3.21721	0.00129446	0.0125544
ILL.rbsB-BSU35960.12~929	10514.1	1.43902	0.529761	2.71636	0.00660049	0.0482828
ILL.rbsC-BSU35950.1~969	8496.34	1.85683	0.585743	3.17004	0.00152418	0.0144033
ILL.rbsD-BSU35930.1~396	3187.06	2.5233	0.70948	3.55655	0.000375753	0.00453364
ILL.rbsK-BSU35920.1~882	13094.3	2.45705	0.646175	3.80245	0.000143272	0.00195564
ILL.rbsR-BSU35910.12~992	16654.4	2.72946	0.661344	4.12714	3.67299e-05	0.000609287
ILL.recA-BSU16940.1~1047	13081.9	0.209097	0.280587	0.745212	0.456143	0.747154
ILL.recF-BSU00040.1~1113	8305.05	0.359714	0.26635	1.35053	0.176846	0.458397
ILL.recG-BSU15870.1~2049	2048.42	0.709992	0.273162	2.59916	0.00934531	0.0632562
ILL.recJ-BSU27620.19~2379	10321.5	0.181719	0.294235	0.617598	0.536841	0.798075
ILL.recN-BSU24240.1~1731	4651.02	0.702741	0.287225	2.44665	0.0144189	0.0865988
ILL.recO-BSU25280.1~768	3111.6	0.366511	0.287934	1.2729	0.203054	0.494107
ILL.recQ-BSU23020.1~1491	1222.7	-0.0274084	0.289389	-0.0947113	0.924544	0.976322
ILL.recR-BSU00210.1~597	1746.68	0.36522	0.431597	0.846206	0.397438	0.700544
ILL.recU-BSU22310.7~627	1169.28	-0.380928	0.296144	-1.28629	0.198341	0.488387
ILL.recX-BSU08520.89~883	1153.72	0.0766444	0.285899	0.268082	0.788636	0.933741
ILL.relA-BSU27600.1~2205	10528.5	0.471357	0.304056	1.55023	0.121086	0.37043
ILL.resA-BSU23150.1~540	1284.75	-0.00205732	0.292968	-0.00702235	0.994397	0.998337
ILL.resB-BSU23140.1~1629	3604.99	-0.0503054	0.281779	-0.178528	0.858309	0.956192
ILL.resC-BSU23130.20~1195	2319.83	0.0479722	0.325857	0.147218	0.88296	0.962268
ILL.resD-BSU23120.1~723	1625.95	-0.119749	0.305831	-0.391553	0.695389	0.894172
ILL.resE-BSU23110.1~1770	4517.26	-0.154321	0.278444	-0.554227	0.579424	0.825073
ILL.rex-BSU12280.252~674	11408.4	0.154535	0.265161	0.582799	0.560029	0.811131
ILL.rghRA-BSU33660.18~425	426.19	0.923993	0.317296	2.91209	0.00359022	0.0293841
ILL.rghRB-BSU33670.1~420	270.8	0.741729	0.325297	2.28016	0.0225981	0.120702
ILL.rhgT-BSU07020.1~699	8.99794	-1.56972	1.05168	-1.49259	0.135545	0.392516
ILL.rho-BSU37080.407~1690	6848.44	0.0998697	0.395888	0.252268	0.800834	0.936694
ILL.ribA-BSU23260.1~1197	1416.97	0.360579	0.434782	0.829332	0.406916	0.707251
ILL.ribC-BSU16670.19~969	2346.21	0.392302	0.275933	1.42173	0.155106	0.426593
ILL.ribD-BSU23280.130~1215	1963.44	0.954402	0.274462	3.47736	0.000506386	0.00583207
ILL.ribE-BSU23270.11~658	600.928	0.337969	0.43108	0.784005	0.433037	0.727823
ILL.ribH-BSU23250.33~497	898.152	0.337472	0.425103	0.79386	0.427277	0.723249
ILL.rimI-BSU05930.6~461	1089.39	1.74443	0.565137	3.08674	0.00202367	0.0181504
ILL.rimM-BSU16020.5~529	4882.25	1.54061	0.286248	5.38207	7.3634e-08	3.64039e-06
ILL.rimO-BSU25430.1~1356	8249.8	0.0222444	0.386662	0.0575294	0.954123	0.98498
ILL.rlmB-BSU00960.1~750	1088.66	-0.448939	0.278409	-1.61252	0.106849	0.347367
ILL.rluB-BSU23160.11~745	1663.83	0.256761	0.327623	0.783709	0.433211	0.727823
ILL.rluD-BSU15460.1~912	4892.22	-0.144541	0.351711	-0.410965	0.681098	0.886386
ILL.rnc-BSU15930.140~889	5493.26	-0.20347	0.311855	-0.652449	0.514111	0.781709
ILL.rnhB-BSU16060.7~774	1297.53	1.67144	0.454026	3.68138	0.000231978	0.00297607
ILL.rnhC-BSU28620.31~972	1181.29	0.261472	0.345896	0.755925	0.449694	0.742893
ILL.rnjA-BSU14530.1~1668	19849.9	0.450178	0.264622	1.70121	0.0889034	0.310716
ILL.rnjB-BSU16780.1~1668	11895.8	0.285606	0.267159	1.06905	0.285048	0.588386
ILL.rnmV-BSU00410.69~629	1445.06	-0.146904	0.531008	-0.276651	0.782048	0.932012
ILL.rnpA-BSU41050.152~502	5531.37	-0.289778	0.678513	-0.427079	0.669322	0.880984
ILL.rnpB-BSU-misc-RNA-35.1~386	173514	0.0799602	0.429723	0.186074	0.852387	0.955597
ILL.rnr-BSU33610.19~2358	6071.07	1.41709	0.306963	4.61649	3.90276e-06	8.93887e-05
ILL.rocA-BSU37780.10~1557	889.274	1.07454	0.440593	2.43884	0.0147345	0.0880862
ILL.rocB-BSU37770.68~1768	42.4672	0.124586	0.598356	0.208214	0.835062	0.950672
ILL.rocC-BSU37760.1~1413	74.8143	0.358483	0.453276	0.790871	0.429019	0.724066
ILL.rocD-BSU40340.32~1237	253.404	0.50078	0.426855	1.17318	0.240722	0.535026
ILL.rocE-BSU40330.223~1626	933.274	-0.975584	0.35477	-2.74991	0.00596125	0.0446708
ILL.rocG-BSU37790.1~1275	640.785	1.10418	0.445885	2.47638	0.0132723	0.0816478
ILL.rocR-BSU40350.10~1395	1127.92	-0.463453	0.48549	-0.95461	0.339775	0.649127
ILL.rodA-BSU38120.102~1283	2356.28	0.11981	0.36214	0.330841	0.740765	0.912133
ILL.rok-BSU14240.26~601	3303.41	0.408221	0.274811	1.48546	0.137422	0.396102
ILL.rpe-BSU15790.5~658	1919.85	0.56511	0.294935	1.91605	0.055359	0.231605
ILL.rph-BSU28370.20~757	1510.04	-0.0182865	0.389537	-0.0469442	0.962558	0.989153
ILL.rplA-BSU01030.95~793	81388.3	-0.355488	0.338879	-1.04901	0.294173	0.598352
ILL.rplB-BSU01190.32~865	112451	-0.302955	0.286482	-1.0575	0.290282	0.594046
ILL.rplC-BSU01160.37~666	66340.9	-0.581041	0.40704	-1.42748	0.153442	0.424481
ILL.rplD-BSU01170.28~651	49230	-0.500919	0.394484	-1.26981	0.204152	0.495293
ILL.rplE-BSU01280.27~566	40101.7	-0.546946	0.262779	-2.08139	0.0373982	0.173271
ILL.rplF-BSU01310.1~540	37407.8	-0.487968	0.280634	-1.73881	0.082069	0.29574
ILL.rplI-BSU40500.1~450	3180.36	0.467815	0.269755	1.73422	0.0828785	0.296913
ILL.rplJ-BSU01040.66~566	66349.4	-0.265262	0.287647	-0.922179	0.356435	0.664057
ILL.rplK-BSU01020.63~488	100043	-0.215167	0.290573	-0.740494	0.459001	0.747963
ILL.rplL-BSU01050.46~417	60490.7	-0.0934767	0.293141	-0.318879	0.749818	0.915117
ILL.rplM-BSU01490.49~486	66275.1	-0.041109	0.369987	-0.111109	0.91153	0.973226
ILL.rplN-BSU01260.41~409	25384.3	-0.567105	0.266391	-2.12885	0.0332667	0.15998
ILL.rplO-BSU01350.31~471	41853.1	-0.305161	0.321201	-0.950063	0.34208	0.651343
ILL.rplP-BSU01230.2~436	28546.2	-0.609244	0.290365	-2.0982	0.0358871	0.168387
ILL.rplQ-BSU01440.1~363	31804.5	0.0152626	0.336966	0.0452944	0.963873	0.990002
ILL.rplR-BSU01320.33~395	33085.7	-0.570519	0.275302	-2.07234	0.0382341	0.176265
ILL.rplS-BSU16040.11~367	114969	-0.346577	0.282186	-1.22819	0.219377	0.511712
ILL.rplT-BSU28850.1~360	17104.5	-0.169161	0.354059	-0.477776	0.63281	0.863066
ILL.rplU-BSU27960.14~322	46010.7	-0.423776	0.319403	-1.32677	0.184583	0.469387
ILL.rplV-BSU01210.1~342	33626.5	-0.76394	0.417246	-1.83091	0.0671137	0.262624
ILL.rplW-BSU01180.1~288	18379.7	-0.486197	0.371438	-1.30896	0.190549	0.477545
ILL.rplX-BSU01270.38~349	25123.9	-0.680363	0.289328	-2.35153	0.0186964	0.105496
ILL.rpmA-BSU27940.2~286	39983.5	0.153631	0.297653	0.516141	0.605756	0.845616
ILL.rpmB-BSU15820.77~265	34116.4	0.484057	0.371172	1.30413	0.192189	0.478488
ILL.rpmC-BSU01240.1~201	7098.36	-0.822499	0.33803	-2.43321	0.0149655	0.0887873
ILL.rpmD-BSU01340.1~180	7555.65	-0.482743	0.285913	-1.68842	0.0913298	0.314572
ILL.rpmE-BSU37070.16~216	20039.7	-0.138207	0.264488	-0.522547	0.601289	0.842072
ILL.rpmE2-BSU30700.121~369	63.0778	0.0743446	0.544962	0.136422	0.891488	0.96437
ILL.rpmF-BSU15080.22~201	24209	0.664748	0.35942	1.8495	0.0643855	0.256403
ILL.rpmG-BSU00990.93~242	1030.89	-0.492827	0.279059	-1.76603	0.0773907	0.285613
ILL.rpmG-BSU24900.23~172	16947.5	0.16913	0.528775	0.319852	0.74908	0.915117
ILL.rpmH-BSU41060.140~274	18832.7	0.146195	0.327086	0.446963	0.654902	0.875074
ILL.rpmI-BSU28860.13~213	16161.9	-0.471041	0.442451	-1.06462	0.287049	0.59101
ILL.rpmJ-BSU01400.7~120	7105.68	-0.566404	0.308582	-1.8355	0.0664313	0.260709
ILL.rpoA-BSU01430.1~945	131977	-0.37948	0.270709	-1.4018	0.160975	0.436516
ILL.rpoB-BSU01070.2~3583	146959	0.379382	0.277286	1.36819	0.171251	0.45136
ILL.rpoC-BSU01080.62~3661	117370	0.389439	0.261022	1.49198	0.135705	0.392683
ILL.rpoE-BSU37160.73~594	12119.7	-0.730493	0.411015	-1.77729	0.0755201	0.280733
ILL.rpoZ-BSU15690.1~204	1527.64	-0.0187117	0.307928	-0.0607664	0.951545	0.984826
ILL.rpsA-BSU22880.25~1173	18857.1	-0.41972	0.300687	-1.39587	0.162753	0.438194
ILL.rpsB-BSU16490.60~800	67190.7	-0.0172054	0.288617	-0.0596131	0.952464	0.984956
ILL.rpsC-BSU01220.1~657	44711.6	-0.613923	0.295046	-2.08077	0.0374547	0.173335
ILL.rpsD-BSU29660.112~714	90381.6	-0.0523425	0.279084	-0.187551	0.851229	0.9546
ILL.rpsE-BSU01330.1~501	37412.8	-0.429362	0.308614	-1.39126	0.164147	0.440405
ILL.rpsF-BSU40910.30~317	39184.8	-0.604427	0.363343	-1.66352	0.096209	0.325841
ILL.rpsG-BSU01110.10~480	60529.9	-0.493495	0.270941	-1.82141	0.0685446	0.265441
ILL.rpsH-BSU01300.32~430	34689.8	-0.627961	0.290175	-2.16407	0.0304587	0.150953
ILL.rpsI-BSU01500.21~413	51005.4	0.318777	0.285868	1.11512	0.264798	0.564698
ILL.rpsJ-BSU01150.113~421	32773	-0.737687	0.463519	-1.59149	0.111499	0.355904
ILL.rpsK-BSU01420.1~396	45191.4	-0.270383	0.291474	-0.92764	0.353594	0.662417
ILL.rpsL-BSU01100.114~530	82493.6	-0.513761	0.300446	-1.70999	0.0872673	0.306963
ILL.rpsM-BSU01410.1~366	36311.4	-0.363417	0.268073	-1.35566	0.175206	0.457029
ILL.rpsN-BSU01290.23~208	15368.2	-0.715591	0.318961	-2.2435	0.0248643	0.130909
ILL.rpsN-BSU08880.104~373	17.6855	0.3344	0.805414	0.415191	0.678002	0.884637
ILL.rpsO-BSU16680.58~327	53568.1	-0.198998	0.291315	-0.6831	0.494544	0.769209
ILL.rpsP-BSU15990.1~273	10857.1	0.306616	0.328393	0.933685	0.350466	0.660833
ILL.rpsQ-BSU01250.23~286	15060.6	-0.949866	0.418341	-2.27056	0.0231738	0.123614
ILL.rpsR-BSU40890.1~240	25566.9	-0.230927	0.275706	-0.837586	0.402263	0.704036
ILL.rpsS-BSU01200.8~286	23494.6	-0.770854	0.401857	-1.91823	0.0550821	0.231423
ILL.rpsT-BSU25550.51~317	46919.9	0.144763	0.359469	0.402714	0.687158	0.889631
ILL.rpsU-BSU25410.11~184	17185.9	-0.478121	0.271121	-1.7635	0.0778164	0.285613
ILL.rsbP-BSU34110.36~1247	1311.67	-0.217587	0.304516	-0.714535	0.474896	0.757368
ILL.rsbQ-BSU34100.16~825	909.265	0.0671147	0.310905	0.215869	0.82909	0.948747
ILL.rsbRA-BSU04670.39~863	2232.09	0.367755	0.362942	1.01326	0.310936	0.616699
ILL.rsbRB-BSU13200.12~845	2273.88	-0.0414858	0.288606	-0.143745	0.885702	0.962287
ILL.rsbRC-BSU19450.16~864	685.803	-0.433255	0.411113	-1.05386	0.291948	0.59625
ILL.rsbRD-BSU24760.87~923	60.9178	1.32281	0.528757	2.50173	0.0123589	0.0777997
ILL.rsbS-BSU04680.4~369	918.701	0.358495	0.38935	0.920751	0.35718	0.66514
ILL.rsbT-BSU04690.4~405	1332.07	0.372097	0.391979	0.949278	0.342479	0.651343
ILL.rsbU-BSU04700.1~1008	2873.34	0.489912	0.34358	1.42591	0.153896	0.424481
ILL.rsbV-BSU04710.1~330	776.519	0.630212	0.315654	1.99653	0.0458766	0.201064
ILL.rsbW-BSU04720.1~483	1431.07	0.749466	0.314698	2.38154	0.0172403	0.099138
ILL.rsbX-BSU04740.1~600	1893.16	0.811507	0.331315	2.44935	0.0143114	0.0860808
ILL.rseP-BSU16560.1~1269	12090.6	0.821146	0.300218	2.73517	0.0062348	0.0460399
ILL.rsfA-BSU37620.1~777	18.6577	1.28812	0.781443	1.64838	0.0992741	0.332768
ILL.rsgI-BSU13460.1~1146	605.639	-0.0395704	0.429151	-0.0922063	0.926534	0.976643
ILL.rsiV-BSU27130.1~858	25.6994	0.0873251	0.635733	0.137361	0.890745	0.96437
ILL.rsiW-BSU01740.14~640	8133.36	0.532916	0.447679	1.1904	0.23389	0.526745
ILL.rsiX-BSU23090.1~1107	4294.51	-0.953778	0.449684	-2.12099	0.0339223	0.161637
ILL.rsmB-BSU15740.1~1344	2962.33	0.646454	0.271275	2.38302	0.0171713	0.0988813
ILL.rsoA-BSU33222.1~240	13.3625	1.65457	1.0317	1.60373	0.108773	0.350691
ILL.rtp-BSU18490.41~409	108.12	0.555616	0.451456	1.23072	0.218427	0.510083
ILL.rtpA-BSU02530.98~259	28.1162	0.649042	0.617045	1.05186	0.292866	0.597222
ILL.ruvA-BSU27740.12~617	1010.1	0.258716	0.280212	0.923285	0.355859	0.663898
ILL.ruvB-BSU27730.11~1015	1943.16	0.293257	0.27395	1.07047	0.284406	0.588155
ILL.sacA-BSU38040.1~1440	10563.8	4.14505	0.343132	12.08	1.34648e-33	5.45861e-30
ILL.sacB-BSU34450.132~1553	182.147	3.214	0.427574	7.51683	5.61201e-14	1.3383e-11
ILL.sacC-BSU27030.1~2034	117.056	0.854985	0.535818	1.59566	0.110564	0.354329
ILL.sacP-BSU38050.1~1386	5884.34	4.20314	0.420079	10.0056	1.44028e-23	9.73149e-21
ILL.sacT-BSU38070.1~831	197.882	0.369371	0.547796	0.674286	0.50013	0.772685
ILL.sacV-BSU04830.9~203	6.56586	0.788707	1.14716	0.687528	0.49175	0.767875
ILL.sacX-BSU38410.272~1651	438.838	0.113474	0.412612	0.275015	0.783305	0.932012
ILL.sacY-BSU38420.1~843	317.833	-0.0423508	0.493469	-0.0858227	0.931607	0.979528
ILL.safA-BSU27840.1~1164	103.818	1.5768	0.421695	3.73919	0.000184614	0.00244584
ILL.salA-BSU01540.20~1078	14985	0.272247	0.358753	0.758871	0.44793	0.742047
ILL.sapB-BSU06650.107~805	324.175	-1.17534	0.562519	-2.08942	0.0366697	0.171266
ILL.sat-BSU10920.1~1170	5.09353	-1.19594	1.51786	-0.787908	0.43075	0.725493
ILL.sat-BSU15590.49~1197	530.79	-1.05874	0.477356	-2.21793	0.0265594	0.136466
ILL.sbcC-BSU10650.1~3393	2404.34	-0.200658	0.281562	-0.712661	0.476055	0.758324
ILL.sbcD-BSU10640.8~1183	549.589	-0.209262	0.29154	-0.717782	0.472892	0.755455
ILL.sboA-BSU37350.33~164	5.05823	2.07921	1.66835	1.24627	0.212667	0.504182
ILL.sboX-BSU37360.1~153	1.69669	-1.21651	2.20401	-0.551952	0.580982	NA
ILL.sbp-BSU15270.1~366	826.284	-0.112615	0.431814	-0.260795	0.794251	0.935441
ILL.scoA-BSU38990.1~717	42.5152	1.17264	0.530843	2.20902	0.027173	0.138915
ILL.scoB-BSU38980.1~651	70.9344	1.45477	0.459274	3.16754	0.00153736	0.0144604
ILL.scpA-BSU23220.36~791	1625.95	-0.069293	0.419246	-0.16528	0.868724	0.95962
ILL.scr-BSU-misc-RNA-2.1~103	32124.4	1.10081	0.971485	1.13313	0.257162	0.557504
ILL.scuA-BSU21750.148~729	197.704	-0.388116	0.340433	-1.14007	0.254258	0.555368
ILL.sda-BSU25690.26~184	102.917	-0.550846	0.480325	-1.14682	0.251456	0.550731
ILL.sdaAA-BSU15860.26~928	1819.52	0.710121	0.302104	2.35058	0.0187441	0.10554
ILL.sdaAB-BSU15850.75~737	1335.29	0.751216	0.297758	2.5229	0.011639	0.0752378
ILL.sdhA-BSU28440.1~1761	33580.7	0.154974	0.376297	0.411838	0.680458	0.885951
ILL.sdhB-BSU28430.3~764	14931.5	0.118628	0.330431	0.35901	0.719587	0.903064
ILL.sdhC-BSU28450.26~634	8554.07	0.3004	0.399741	0.751486	0.45236	0.744566
ILL.sdpA-BSU33750.52~528	61.5735	-0.458628	0.683546	-0.670954	0.50225	0.773603
ILL.sdpB-BSU33760.1~972	42.2016	-0.395677	0.919078	-0.430515	0.666821	0.880248
ILL.sdpI-BSU33780.1~624	330.929	-0.270118	0.401282	-0.673136	0.50086	0.772943
ILL.sdpR-BSU33790.47~319	153.039	-0.330399	0.353762	-0.933958	0.350325	0.660833
ILL.seaA-BSU22850.1~894	86.607	0.741234	0.654046	1.13331	0.257086	0.557504
ILL.secA-BSU35300.168~2693	17059.4	0.129446	0.321739	0.402334	0.687438	0.889631
ILL.secDF-BSU27650.1~2214	12531.8	0.159683	0.29493	0.541426	0.588214	0.832619
ILL.secE-BSU01000.34~213	904.376	-0.818741	0.363564	-2.25199	0.024323	0.128728
ILL.secG-BSU33630.39~269	6084.57	0.666967	0.497108	1.3417	0.179695	0.461281
ILL.secY-BSU01360.2~1297	106147	-0.443332	0.295515	-1.5002	0.133562	0.391263
ILL.senS-BSU08810.72~290	0.420133	2.25975	4.91378	0.459879	0.645603	NA
ILL.sepF-BSU15390.1~450	2450.86	0.186281	0.360281	0.517043	0.605126	0.845342
ILL.serA-BSU23070.33~1610	6749.13	-1.37224	0.29868	-4.59434	4.34113e-06	9.8318e-05
ILL.serC-BSU10020.31~1110	3562.15	-0.939593	0.271839	-3.45644	0.000547366	0.00614687
ILL.serS-BSU00130.57~1334	7145.28	0.150805	0.270321	0.557872	0.576932	0.823362
ILL.sigA-BSU25200.129~1244	14546.1	-0.29032	0.359275	-0.808073	0.419049	0.716501
ILL.sigB-BSU04730.1~789	2258.24	0.936494	0.282144	3.31921	0.000902729	0.00933588
ILL.sigD-BSU16470.1~765	1242.94	-1.31212	0.294994	-4.44796	8.66915e-06	0.0001784
ILL.sigE-BSU15320.63~782	18.586	-0.527879	0.731542	-0.721597	0.470542	0.754022
ILL.sigF-BSU23450.1~768	42.3414	0.362014	0.601539	0.601813	0.547299	0.801697
ILL.sigG-BSU15330.1~783	154.594	-0.094045	0.360977	-0.260529	0.794456	0.935441
ILL.sigH-BSU00980.5~661	3517.57	-0.50376	0.276782	-1.82006	0.06875	0.265441
ILL.sigI-BSU13450.5~760	287.234	0.0960362	0.496792	0.193313	0.846714	0.9527
ILL.sigL-BSU34200.13~1323	1039.36	0.23001	0.485609	0.473653	0.635747	0.864292
ILL.sigM-BSU09520.18~509	473.183	-0.246457	0.418246	-0.589264	0.555684	0.807319
ILL.sigO-BSU33230.1~531	36.3414	0.7155	0.669851	1.06815	0.285454	0.588621
ILL.sigV-BSU27120.1~501	11.0702	1.20878	0.995193	1.21462	0.22451	0.518218
ILL.sigW-BSU01730.58~621	7019.38	0.321619	0.531764	0.604816	0.545301	0.801542
ILL.sigX-BSU23100.40~624	2263.94	-0.755955	0.300103	-2.51898	0.0117694	0.0755153
ILL.sigY-BSU38700.1~537	71.0927	0.0632287	0.482226	0.131119	0.895682	0.965203
ILL.sigZ-BSU26840.23~553	49.1111	-0.593973	0.551686	-1.07665	0.281636	0.585514
ILL.sinI-BSU24600.100~273	176.56	0.540125	0.449531	1.20153	0.229546	0.522934
ILL.sinR-BSU24610.2~337	1603.25	0.355406	0.338506	1.04993	0.293751	0.597849
ILL.sipS-BSU23310.1~555	2481.14	-0.211922	0.285033	-0.743498	0.45718	0.747644
ILL.sipT-BSU14410.35~616	1604.95	0.466928	0.32542	1.43485	0.15133	0.421935
ILL.sipU-BSU04010.1~564	1115.9	-0.0506276	0.323152	-0.156668	0.875507	0.961937
ILL.sipV-BSU10490.2~508	369.413	-0.154519	0.333575	-0.46322	0.643207	0.869241
ILL.sipW-BSU24630.1~573	15.098	-3.85866	1.1446	-3.3712	0.000748422	0.00798448
ILL.sirB-BSU15620.1~786	922.007	-0.686967	0.346006	-1.98542	0.047098	0.205086
ILL.sirC-BSU15630.1~489	621.486	-0.468595	0.347603	-1.34808	0.177634	0.45962
ILL.skfA-BSU01910.44~211	130.428	0.469681	0.481433	0.97559	0.329268	0.637769
ILL.skfB-BSU01920.67~1299	109.455	-0.31663	0.382427	-0.827948	0.4077	0.707844
ILL.skfC-BSU01935.1~1491	116.361	-0.148317	0.414225	-0.358058	0.7203	0.903297
ILL.skfE-BSU01950.19~738	78.4582	-0.285716	0.476523	-0.599586	0.548782	0.802005
ILL.skfF-BSU01960.1~1344	79.1164	-0.792369	0.484139	-1.63666	0.101702	0.336984
ILL.skfG-BSU01970.6~521	34.432	0.312181	0.660521	0.472629	0.636478	0.864719
ILL.skfH-BSU01980.5~430	34.3298	-0.500239	0.593107	-0.843421	0.398993	0.701743
ILL.sleB-BSU22930.1~918	81.2874	4.15549	0.711073	5.84397	5.09725e-09	3.82671e-07
ILL.slp-BSU14620.12~386	98.0678	0.657832	0.463116	1.42045	0.155478	0.427167
ILL.slrA-BSU38229.168~326	613.804	0.590288	0.344581	1.71306	0.0867019	0.305668
ILL.slrR-BSU34380.1~459	7.39665	-1.84199	1.3069	-1.40943	0.158709	0.432687
ILL.smc-BSU15940.9~3569	10962.2	0.105219	0.267589	0.393213	0.694162	0.893659
ILL.smpB-BSU33600.1~471	2077.97	-0.0838332	0.426812	-0.196417	0.844283	0.952179
ILL.sodA-BSU25020.37~645	32015.5	-0.0889146	0.265395	-0.335028	0.737604	0.911383
ILL.sodC-BSU19400.93~683	61.7442	1.6251	0.477855	3.40082	0.000671836	0.0073413
ILL.sodF-BSU19330.1~846	17.3495	1.86953	1.07702	1.73584	0.0825928	0.296311
ILL.spbC-BSU33770.43~654	211.932	-0.994411	0.382227	-2.60163	0.00927827	0.0630799
ILL.spcB-BSU23210.1~594	1294.37	-0.102352	0.369927	-0.276681	0.782025	0.932012
ILL.speA-BSU14630.27~1499	5435.05	-0.732671	0.527511	-1.38892	0.164857	0.441232
ILL.speB-BSU37490.61~933	5862	0.123952	0.31596	0.392303	0.694834	0.894099
ILL.speD-BSU29010.118~498	12473.6	-0.462107	0.42208	-1.09483	0.273591	0.576774
ILL.speE-BSU37500.27~857	5808.24	-0.694996	0.469684	-1.47971	0.138951	0.398474
ILL.splA-BSU13920.91~330	306.392	1.8085	0.331364	5.45776	4.82177e-08	2.60633e-06
ILL.splB-BSU13930.1~1029	1108.29	1.89966	0.280062	6.783	1.17702e-11	1.53924e-09
ILL.spmA-BSU23180.1~591	82.5906	1.82097	0.43321	4.20344	2.62891e-05	0.000457408
ILL.spmB-BSU23170.1~537	71.4258	1.85293	0.523764	3.53771	0.000403612	0.00482929
ILL.spo0A-BSU24220.196~999	3929.06	0.280643	0.296877	0.945316	0.344498	0.653836
ILL.spo0B-BSU27930.321~899	3126.61	1.22156	0.424041	2.88075	0.00396726	0.0317852
ILL.spo0E-BSU13640.48~305	509.225	-0.429661	0.354637	-1.21155	0.225685	0.518971
ILL.spo0F-BSU37130.1~375	424.274	0.410831	0.349623	1.17507	0.239968	0.533642
ILL.spo0M-BSU08760.7~783	3497.12	-2.14307	0.55906	-3.83335	0.000126412	0.00176715
ILL.spoIIAA-BSU23470.14~367	21.0641	0.475114	0.693998	0.684604	0.493594	0.768756
ILL.spoIIAB-BSU23460.1~441	30.1791	0.736467	0.685649	1.07412	0.28277	0.58727
ILL.spoIIB-BSU28060.117~1115	31.1699	0.651236	1.14482	0.568854	0.569455	0.81797
ILL.spoIID-BSU36750.152~1183	1762.96	3.16471	0.677178	4.67339	2.96274e-06	7.40661e-05
ILL.spoIIE-BSU00640.200~2683	1605.24	1.95297	0.908794	2.14897	0.0316366	0.154338
ILL.spoIIGA-BSU15310.155~1084	18.1619	0.55713	0.779067	0.715125	0.474532	0.757085
ILL.spoIIIAA-BSU24430.1~924	11.926	1.7927	1.03232	1.73657	0.0824635	0.296311
ILL.spoIIIAB-BSU24420.1~516	7.50233	1.3493	1.28326	1.05146	0.293045	0.597288
ILL.spoIIIAC-BSU24410.1~207	1.57316	2.46358	2.59646	0.948824	0.34271	NA
ILL.spoIIIAD-BSU24400.1~402	4.16226	-0.38657	1.5418	-0.250726	0.802026	0.937017
ILL.spoIIIAE-BSU24390.1~1200	17.6358	1.22312	0.770671	1.58708	0.112494	0.356658
ILL.spoIIIAF-BSU24380.1~621	5.2439	-0.00565584	1.28414	-0.00440437	0.996486	0.998746
ILL.spoIIIAG-BSU24370.1~690	6.11666	-0.124219	1.19521	-0.103931	0.917224	0.97512
ILL.spoIIIAH-BSU24360.1~657	15.5225	0.00334305	0.772458	0.00432781	0.996547	0.998746
ILL.spoIIID-BSU36420.9~290	9.13544	-0.308001	0.997889	-0.308652	0.757586	0.917888
ILL.spoIIIE-BSU16800.70~2439	2173.56	-0.0749411	0.510629	-0.146762	0.88332	0.962268
ILL.spoIIIJ-BSU41040.1~786	9054.03	-0.166953	0.4362	-0.382744	0.70191	0.895253
ILL.spoIIM-BSU23530.101~745	35.0649	1.87912	0.610104	3.07999	0.00207006	0.0185255
ILL.spoIIP-BSU25530.63~1268	53.3026	0.884489	0.490274	1.80407	0.0712204	0.272002
ILL.spoIIQ-BSU36550.1~852	124.162	0.851682	0.381584	2.23196	0.0256175	0.133145
ILL.spoIIR-BSU36970.1~675	165.551	2.53675	0.541344	4.68602	2.78568e-06	7.14755e-05
ILL.spoIISA-BSU12830.1~747	1023.7	0.936684	0.424656	2.20575	0.0274017	0.139443
ILL.spoIISB-BSU12820.1~171	440.207	0.673195	0.353084	1.90662	0.0565704	0.235219
ILL.spoIVA-BSU22800.135~1613	289.492	2.12922	0.499116	4.26599	1.99022e-05	0.000363439
ILL.spoIVB-BSU24230.1~1281	118.736	2.04098	0.544609	3.7476	0.000178535	0.00237305
ILL.spoIVCA-BSU25770.9~1511	268.661	-0.425452	0.391271	-1.08736	0.276877	0.580398
ILL.spoIVFA-BSU27980.150~944	268.057	2.11618	0.591023	3.58053	0.000342896	0.0041997
ILL.spoIVFB-BSU27970.1~867	198.316	2.14738	0.577309	3.71964	0.000199504	0.00260061
ILL.spoVAA-BSU23440.1~621	0.727597	3.02775	3.82913	0.790717	0.429109	NA
ILL.spoVAB-BSU23430.1~426	0.210066	1.43068	4.98385	0.287062	0.774065	NA
ILL.spoVAC-BSU23420.1~453	0.51753	2.52569	4.37555	0.577229	0.563785	NA
ILL.spoVAD-BSU23410.1~1017	4.42951	0.611262	1.45234	0.420882	0.673842	0.88292
ILL.spoVAEA-BSU23401.8~619	12.0264	-0.228377	0.89014	-0.256563	0.797516	0.935894
ILL.spoVAEB-BSU23402.1~351	4.08076	0.42298	1.66133	0.254604	0.799029	0.935894
ILL.spoVAF-BSU23390.1~1482	188.004	0.376594	0.347314	1.0843	0.27823	0.582282
ILL.spoVB-BSU27670.116~1672	29.4015	-0.0320297	0.947221	-0.0338144	0.973025	0.993087
ILL.spoVD-BSU15170.81~2021	455.676	2.29719	0.458176	5.01377	5.33728e-07	1.78657e-05
ILL.spoVE-BSU15210.1~1101	4081.07	-0.038749	0.26992	-0.143557	0.88585	0.962287
ILL.spoVFA-BSU16730.1~894	130.461	4.48588	0.486418	9.22228	2.90849e-20	1.47388e-17
ILL.spoVFB-BSU16740.1~603	122.53	4.09914	0.485613	8.44116	3.14195e-17	1.27375e-14
ILL.spoVG-BSU00490.1~294	1916.47	-0.129904	0.526648	-0.246661	0.80517	0.937432
ILL.spoVID-BSU28110.18~1745	142.463	2.35192	0.469224	5.01237	5.37647e-07	1.78657e-05
ILL.spoVIF-BSU11810.1~255	3.36182	3.65104	2.10324	1.73592	0.0825787	0.296311
ILL.spoVK-BSU17420.503~1471	170.557	1.83975	0.422676	4.35263	1.34515e-05	0.000258448
ILL.spoVM-BSU15810.1~81	54.6816	0.617254	0.504992	1.2223	0.221592	0.515101
ILL.spoVR-BSU09400.1~1407	42.7601	-0.640512	0.518319	-1.23575	0.216552	0.508045
ILL.spoVS-BSU16980.69~329	1419.32	1.07983	0.346666	3.11489	0.00184015	0.0168777
ILL.spoVT-BSU00560.1~537	1558.52	0.872776	0.279217	3.1258	0.00177322	0.016375
ILL.sppA-BSU29530.104~1111	4689.97	-0.479423	0.280146	-1.71133	0.0870199	0.306498
ILL.spsA-BSU37910.1~771	14.0775	0.00946037	0.959755	0.00985707	0.992135	0.998069
ILL.spsB-BSU37900.1~1425	33.4133	0.621699	0.676752	0.918651	0.358278	0.66596
ILL.spsC-BSU37890.1~1170	39.1787	0.386791	0.531517	0.727712	0.46679	0.751182
ILL.spsD-BSU37880.1~870	30.0811	0.000195562	0.629204	0.000310808	0.999752	0.999871
ILL.spsE-BSU37870.1~1122	31.1616	0.365784	0.607842	0.601775	0.547324	0.801697
ILL.spsF-BSU37860.1~723	23.674	-0.28232	0.707845	-0.398845	0.690008	0.89115
ILL.spsG-BSU37850.1~1020	35.532	-0.11581	0.560392	-0.20666	0.836276	0.950797
ILL.spsI-BSU37840.25~765	97.1838	-0.285913	0.432566	-0.660969	0.508632	0.778487
ILL.spsJ-BSU37830.1~948	127.55	-0.443829	0.390299	-1.13715	0.255475	0.556823
ILL.spsK-BSU37820.5~856	91.3586	-0.303747	0.429045	-0.70796	0.47897	0.760549
ILL.spsL-BSU37810.1~456	29.8853	-0.765684	0.740729	-1.03369	0.301281	0.607481
ILL.spxA-BSU11500.1~396	5546.51	0.25762	0.470869	0.547116	0.584299	0.830265
ILL.sqhC-BSU19320.101~1999	120.769	1.14873	0.652687	1.76001	0.0784067	0.286619
ILL.srfAA-BSU03480.298~11061	89543.8	0.537881	0.447721	1.20137	0.229606	0.522934
ILL.srfAB-BSU03490.13~10764	77342.5	0.204397	0.492983	0.414613	0.678425	0.884637
ILL.srfAC-BSU03510.1~3828	26155.4	0.00777273	0.478271	0.0162517	0.987034	0.998069
ILL.srfAD-BSU03520.29~757	5508.79	0.185774	0.488312	0.380442	0.703617	0.895332
ILL.ssbA-BSU40900.1~519	80909.3	-0.528514	0.381307	-1.38606	0.165729	0.442886
ILL.ssbB-BSU36310.1~342	230.758	-0.494366	0.439952	-1.12368	0.261149	0.560051
ILL.sspA-BSU29570.4~213	490.003	0.12739	0.297059	0.428839	0.668041	0.880248
ILL.sspB-BSU09750.35~238	15.6217	2.09612	0.876999	2.3901	0.0168437	0.0974102
ILL.sspC-BSU19950.119~337	2.73295	-0.248779	1.70021	-0.146322	0.883667	0.962268
ILL.sspD-BSU13470.131~325	16.3794	0.223546	0.875625	0.255298	0.798493	0.935894
ILL.sspE-BSU08660.1~255	1179.28	-0.460575	0.279534	-1.64765	0.0994235	0.332768
ILL.sspF-BSU00450.160~345	577.254	3.8303	0.574419	6.66812	2.59106e-11	3.00119e-09
ILL.sspG-BSU32640.159~305	0.440697	0.0109042	4.73128	0.0023047	0.998161	NA
ILL.sspH-BSU08110.54~233	165.965	1.53717	0.518779	2.96306	0.00304599	0.0259599
ILL.sspI-BSU28660.50~265	20.9395	0.165875	0.708478	0.234129	0.814885	0.942691
ILL.sspJ-BSU33340.167~307	17.4315	0.607012	0.823577	0.737044	0.461095	0.747963
ILL.sspK-BSU08550.108~260	3.7984	-0.0162488	1.47767	-0.0109962	0.991226	0.998069
ILL.sspL-BSU22000.42~170	46.6389	0.123365	0.506747	0.243444	0.807661	0.938898
ILL.sspM-BSU22290.1~105	2.47101	0.60206	2.26079	0.266305	0.790004	0.934342
ILL.sspN-BSU18020.65~211	3.24928	0.78847	1.64261	0.480011	0.631219	0.861894
ILL.sspO-BSU17990.1~147	0.564104	0.198471	4.39537	0.0451546	0.963984	NA
ILL.sspP-BSU17980.1~147	0.210066	1.43068	4.98385	0.287062	0.774065	NA
ILL.ssrA-BSU-misc-RNA-55.1~362	77974.4	0.744193	0.580183	1.28269	0.199602	0.489244
ILL.ssuA-BSU08840.1~999	0.697337	-1.00337	3.33843	-0.300553	0.763755	NA
ILL.ssuB-BSU08830.1~768	0.676772	0.782548	4.06095	0.192701	0.847193	NA
ILL.ssuC-BSU08850.1~831	4.37324	-0.0512729	1.40672	-0.0364485	0.970925	0.992556
ILL.ssuD-BSU08860.1~1131	11.9191	0.279141	0.8732	0.319676	0.749214	0.915117
ILL.stoA-BSU13840.5~502	246.348	-0.189586	0.341274	-0.555522	0.578537	0.824306
ILL.sucA-BSU19370.95~2929	92260.4	0.0184512	0.347919	0.0530329	0.957706	0.986357
ILL.sucC-BSU16090.7~1164	28534.4	-0.00689264	0.29766	-0.0231561	0.981526	0.997674
ILL.sucD-BSU16100.29~931	19277.8	0.152841	0.336184	0.454635	0.649372	0.872573
ILL.sufB-BSU32670.21~1418	32078.5	-0.0687901	0.27225	-0.252673	0.800521	0.936694
ILL.sufC-BSU32710.194~979	14645.3	-0.0482441	0.275629	-0.175033	0.861054	0.956514
ILL.sufD-BSU32700.18~1331	23343.2	0.0755604	0.293576	0.257379	0.796886	0.935894
ILL.sufS-BSU32690.1~1221	17754.9	0.00666691	0.295029	0.0225975	0.981971	0.997674
ILL.suhB-BSU14670.24~821	718.607	-0.328017	0.308748	-1.06241	0.28805	0.591867
ILL.sul-BSU00770.1~858	1607.4	0.228475	0.328743	0.694996	0.487058	0.766214
ILL.sumT-BSU15610.99~872	524.992	-1.0298	0.500696	-2.05673	0.0397124	0.180689
ILL.sunA-BSU21480.55~225	678.706	-1.77227	0.556628	-3.18394	0.00145286	0.0138261
ILL.sunI-BSU21490.18~335	1508.15	-1.38283	0.478541	-2.88968	0.0038563	0.0310804
ILL.sunT-BSU21470.58~2175	573.996	-4.3135	0.372558	-11.578	5.32457e-31	1.07929e-27
ILL.swrC-BSU06710.5~3202	12872.4	-0.31901	0.285306	-1.11813	0.26351	0.562998
ILL.tadA-BSU00180.86~571	16664	1.61066	1.00187	1.60765	0.107912	0.349141
ILL.tagA-BSU35750.64~834	4126.94	-0.570941	0.351549	-1.62407	0.10436	0.341486
ILL.tagB-BSU35760.33~1178	1875.32	-0.817862	0.635323	-1.28732	0.197984	0.488387
ILL.tagC-BSU35770.5~1333	265.706	-0.18108	0.326086	-0.555312	0.578681	0.824306
ILL.tagD-BSU35740.114~503	5542.36	-0.511892	0.360462	-1.4201	0.155579	0.427167
ILL.tagE-BSU35730.161~2182	7489.26	0.210537	0.569891	0.369433	0.711805	0.898399
ILL.tagF-BSU35720.1~2241	9793.35	0.207677	0.434928	0.477499	0.633007	0.863066
ILL.tagG-BSU35710.165~992	2705.17	0.377481	0.505041	0.747427	0.454806	0.746324
ILL.tagH-BSU35700.1~1584	8477.94	0.356961	0.43939	0.812402	0.416561	0.714929
ILL.tagO-BSU35530.63~1139	6062.05	0.43692	0.342202	1.27679	0.201676	0.492231
ILL.tasA-BSU24620.14~799	134.25	-3.58142	0.513155	-6.97922	2.96826e-12	4.6282e-10
ILL.tatAC-BSU17710.24~212	357.651	0.179269	0.333775	0.537094	0.591203	0.834227
ILL.tatAD-BSU02630.13~225	6.80313	0.585367	1.21656	0.481166	0.630399	0.861894
ILL.tatAY-BSU05980.22~195	609.016	-0.0134811	0.351857	-0.0383142	0.969437	0.992006
ILL.tatCD-BSU02640.1~729	10.7882	1.78266	0.990641	1.7995	0.0719398	0.272899
ILL.tatCY-BSU05990.1~765	2289	-0.0947725	0.29666	-0.319465	0.749374	0.915117
ILL.tcyA-BSU03610.1~807	4009.08	-0.678872	0.327782	-2.07111	0.0383488	0.176265
ILL.tcyB-BSU03600.1~705	1753.8	-0.424698	0.318483	-1.3335	0.182366	0.465525
ILL.tcyC-BSU03590.1~744	2038.2	-0.232885	0.286887	-0.811768	0.416925	0.714929
ILL.tcyJ-BSU29380.2~811	1.58947	-0.740522	2.50636	-0.295457	0.767645	NA
ILL.tcyK-BSU29370.12~824	2.61499	0.154847	1.87534	0.08257	0.934193	0.979692
ILL.tcyL-BSU29360.1~720	0.650763	0.850622	4.10536	0.207198	0.835855	NA
ILL.tcyM-BSU29350.1~708	1.35884	-0.336854	2.69828	-0.12484	0.90065	NA
ILL.tcyN-BSU29340.1~780	2.3842	-0.730829	2.18903	-0.333859	0.738486	0.911639
ILL.tcyP-BSU09130.17~1408	3526.99	-0.310351	0.57663	-0.538215	0.590429	0.833926
ILL.tdh-BSU16990.106~1149	2220.84	1.26375	0.503713	2.50887	0.0121118	0.076841
ILL.tdk-BSU37060.89~676	4913.55	2.55184	0.520108	4.90637	9.27771e-07	2.80685e-05
ILL.tenA-BSU11650.79~789	63.9285	0.385349	0.4478	0.860537	0.389493	0.69254
ILL.tenI-BSU11660.1~618	56.1061	0.223268	0.50093	0.445706	0.655809	0.875157
ILL.tepA-BSU16790.56~793	170.993	1.98073	0.481885	4.11039	3.94998e-05	0.000645695
ILL.tetB-BSU40770.122~1498	1536.41	-0.338148	0.28405	-1.19045	0.233868	0.526745
ILL.tgl-BSU31270.158~895	54.5056	-0.0749615	0.471462	-0.158998	0.87367	0.96129
ILL.tgt-BSU27710.27~1172	6339.28	0.131299	0.264876	0.495699	0.620106	0.854376
ILL.thiC-BSU08790.133~1905	524.606	0.986801	0.330967	2.98157	0.00286773	0.0247885
ILL.thiD-BSU38020.15~830	2832.09	-0.308746	0.267369	-1.15475	0.248191	0.547127
ILL.thiE-BSU38290.1~669	898.35	0.27689	0.354136	0.781875	0.434288	0.729095
ILL.thiF-BSU11700.1~1011	141.832	0.595055	0.373899	1.59149	0.1115	0.355904
ILL.thiG-BSU11690.1~771	82.0965	0.348781	0.466993	0.746866	0.455145	0.746324
ILL.thiL-BSU05900.107~1084	3271.69	1.80289	0.667174	2.70228	0.00688653	0.0497647
ILL.thiM-BSU38300.8~826	840.093	0.357065	0.367381	0.971919	0.331091	0.640077
ILL.thiN-BSU15800.73~717	1046.65	0.897622	0.356534	2.51763	0.0118146	0.0756658
ILL.thiO-BSU11670.1~1110	105.849	0.468328	0.434116	1.07881	0.280673	0.584712
ILL.thiS-BSU11680.1~201	12.1046	-0.681355	0.95408	-0.714149	0.475135	0.757451
ILL.thiT-BSU30990.100~678	362.783	-0.127378	0.443137	-0.287447	0.77377	0.927517
ILL.thiU-BSU13240.97~699	49.3424	0.427014	0.497357	0.858566	0.39058	0.69329
ILL.thiV-BSU13230.2~601	36.7107	0.600334	0.646296	0.928885	0.352949	0.661919
ILL.thiW-BSU13220.1~1644	137.927	0.627589	0.395564	1.58657	0.11261	0.356658
ILL.thiX-BSU13210.1~765	66.779	0.46383	0.45907	1.01037	0.312319	0.616896
ILL.thrB-BSU32240.1~930	1077.65	-1.25874	0.31319	-4.01911	5.84188e-05	0.000883694
ILL.thrC-BSU32250.1~1059	1360.55	-1.46134	0.307087	-4.75871	1.94839e-06	5.06626e-05
ILL.thrS-BSU28950.44~1975	16299.4	0.207062	0.293712	0.704985	0.48082	0.761091
ILL.thrZ-BSU37560.54~1970	201.538	0.0186179	0.390792	0.0476415	0.962002	0.989053
ILL.thyA-BSU17680.22~861	621.249	-0.443191	0.384742	-1.15192	0.249355	0.547612
ILL.thyA-BSU21820.84~878	1670.53	0.352593	0.332878	1.05923	0.289497	0.59367
ILL.tig-BSU28230.84~1358	76585.2	-0.0457121	0.298112	-0.153339	0.878131	0.962268
ILL.tilS-BSU00670.1~1419	4822.68	-0.282008	0.411938	-0.684587	0.493604	0.768756
ILL.tkt-BSU17890.1~2004	41398.1	0.233992	0.267982	0.873162	0.382575	0.687074
ILL.tlp-BSU18030.37~288	10.9651	-0.292058	0.944166	-0.309329	0.757071	0.917704
ILL.tlpA-BSU31250.5~1993	98.4239	-0.105191	0.449038	-0.234259	0.814784	0.942691
ILL.tlpB-BSU31230.1~1989	909.312	-2.35234	0.463322	-5.07711	3.83223e-07	1.3628e-05
ILL.tlpC-BSU03440.11~1732	511.016	-0.939566	0.297176	-3.16164	0.00156881	0.0147221
ILL.tmk-BSU00280.1~639	1978.4	1.10236	0.433134	2.54508	0.0109252	0.0716677
ILL.tmrB-BSU03140.5~598	180.529	0.330269	0.35464	0.931279	0.351709	0.661138
ILL.tnrA-BSU13310.1~333	147.135	-0.385471	0.470956	-0.818486	0.41308	0.711396
ILL.topA-BSU16120.1~2076	7677.37	-0.307075	0.280362	-1.09528	0.273393	0.576658
ILL.topB-BSU04260.14~2197	3766.4	-0.0219954	0.279709	-0.0786365	0.937322	0.981148
ILL.tpiA-BSU33920.19~780	13785	0.501363	0.350691	1.42965	0.152819	0.424481
ILL.tpx-BSU29490.14~517	6536.48	0.10124	0.34374	0.294526	0.768356	0.923211
ILL.treA-BSU07810.1~1686	22326.5	0.505925	0.348608	1.45127	0.146704	0.413691
ILL.treP-BSU07800.1~1413	20759.9	0.147041	0.328238	0.447973	0.654173	0.875074
ILL.treR-BSU07820.14~730	12640.7	0.813887	0.279441	2.91255	0.00358486	0.0293841
ILL.trmB-BSU29900.1~642	4644.82	0.0531118	0.369986	0.143551	0.885855	0.962287
ILL.trmD-BSU16030.1~732	7048.36	1.55845	0.266545	5.84686	5.0095e-09	3.82671e-07
ILL.trmE-BSU41020.112~1491	4912.52	-0.391991	0.304578	-1.287	0.198095	0.488387
ILL.trmK-BSU25180.86~736	1741.67	0.538592	0.29229	1.84266	0.0653782	0.258258
ILL.trpA-BSU22630.1~804	1512.49	-0.129289	0.348726	-0.370746	0.710826	0.897854
ILL.trpB-BSU22640.1~1203	35.4446	0.148789	0.566636	0.262583	0.792872	0.935441
ILL.trpC-BSU22660.1~750	10.2703	-0.298535	0.993399	-0.300518	0.763782	0.919796
ILL.trpD-BSU22670.1~1017	29.0896	0.471634	0.952947	0.494922	0.620655	0.854376
ILL.trpE-BSU22680.141~1688	261.785	0.768849	0.726323	1.05855	0.289805	0.593695
ILL.trpF-BSU22650.1~648	3.20404	-0.973456	1.92682	-0.505215	0.613408	0.849302
ILL.trpP-BSU10010.30~548	3181.63	-0.42212	0.311385	-1.35562	0.175219	0.457029
ILL.trpS-BSU11420.59~1051	3554.14	-0.0746647	0.297445	-0.25102	0.801799	0.937017
ILL.truA-BSU01480.1~744	15531	1.8541	0.320362	5.78753	7.14282e-09	5.17089e-07
ILL.truB-BSU16660.82~1011	1377.99	0.700507	0.29965	2.33776	0.0193999	0.108181
ILL.trxA-BSU28500.1~315	4012.51	-0.270245	0.290224	-0.931162	0.35177	0.661138
ILL.trxB-BSU34790.193~1143	6174.05	1.01929	0.593658	1.71697	0.085985	0.304439
ILL.tsf-BSU16500.102~983	56603.2	-0.0223579	0.273202	-0.0818364	0.934777	0.979981
ILL.tuaB-BSU35600.812~2263	46.9958	-0.0124549	0.585418	-0.0212752	0.983026	0.997674
ILL.tuaC-BSU35590.1~1170	52.9345	-0.458888	0.49947	-0.91875	0.358226	0.66596
ILL.tuaD-BSU35580.1~1386	75.1029	-0.238865	0.445359	-0.536343	0.591721	0.834669
ILL.tuaE-BSU35570.1~1467	78.2169	-0.649897	0.425437	-1.5276	0.126613	0.381059
ILL.tuaF-BSU35560.29~709	42.3676	-0.461651	0.551819	-0.836599	0.402818	0.704497
ILL.tuaG-BSU35550.7~765	56.2551	-0.248051	0.536686	-0.462189	0.643945	0.869505
ILL.tuaH-BSU35540.1~1194	73.3751	-0.899972	0.440247	-2.04424	0.0409297	0.184982
ILL.tufA-BSU01130.23~1213	315771	-0.235706	0.286494	-0.822725	0.410664	0.70995
ILL.tyrA-BSU22610.49~1164	2999.24	-0.259239	0.297742	-0.870685	0.383926	0.687736
ILL.tyrS-BSU29670.189~1457	7407.7	-0.268539	0.265652	-1.01087	0.31208	0.616896
ILL.tyrZ-BSU38460.42~1283	183.3	1.40606	0.520779	2.69993	0.00693551	0.0500294
ILL.ubiD-BSU03640.1~1422	104.728	0.10776	0.405222	0.265927	0.790296	0.934342
ILL.ubiE-BSU22750.7~708	3245.79	0.725446	0.341227	2.12599	0.0335039	0.160549
ILL.udk-BSU27330.7~642	8100.34	0.508105	0.290465	1.74928	0.0802425	0.291628
ILL.ugtP-BSU21920.1~1149	5049.52	-0.471621	0.368911	-1.27841	0.201103	0.491721
ILL.ung-BSU37970.14~691	994.081	-0.160804	0.321564	-0.50007	0.617026	0.852274
ILL.upp-BSU36890.135~764	9719.67	-0.0543525	0.267806	-0.202954	0.839171	0.951782
ILL.uppS-BSU16530.131~913	5649.43	1.0346	0.33419	3.09583	0.00196265	0.0178399
ILL.ureA-BSU36660.819~1136	12.1648	-0.663357	0.943327	-0.70321	0.481925	0.761389
ILL.ureB-BSU36650.1~375	15.3276	-0.204747	0.799414	-0.256121	0.797857	0.935894
ILL.ureC-BSU36640.1~1710	214.955	0.0755784	0.443662	0.170351	0.864734	0.957561
ILL.usd-BSU36430.204~314	1.82993	-1.66024	2.43339	-0.682273	0.495066	NA
ILL.uvrA-BSU35160.8~2881	6463.03	0.242578	0.296053	0.819374	0.412573	0.711158
ILL.uvrB-BSU35170.79~2064	2987.29	0.117431	0.320965	0.365868	0.714464	0.900315
ILL.uvrC-BSU28490.21~1793	1409.22	0.0967012	0.28001	0.345349	0.729832	0.908145
ILL.uvrX-BSU21500.1~1251	18.666	-0.472962	0.730435	-0.647508	0.517303	0.785274
ILL.uvsE-BSU37200.1~963	18.4366	-0.536174	0.736388	-0.728113	0.466544	0.751182
ILL.uxaA-BSU12390.1~1494	69.9777	0.888177	0.494572	1.79585	0.0725185	0.274217
ILL.uxaB-BSU12380.1~1443	52.3254	0.862589	0.498306	1.73104	0.0834443	0.29762
ILL.uxaC-BSU12300.1~1422	399.993	1.67756	0.401955	4.17349	2.99965e-05	0.000513104
ILL.uxuA-BSU12340.1~1080	11.2986	0.504148	0.910689	0.55359	0.57986	0.825333
ILL.valS-BSU28090.60~2702	8716.92	-0.180335	0.288897	-0.624218	0.532484	0.794221
ILL.veg-BSU00440.40~300	10106.7	0.66926	0.447602	1.49521	0.134859	0.391633
ILL.vmlR-BSU05610.216~1859	1937.09	1.7893	0.429518	4.16584	3.10205e-05	0.00052618
ILL.vpr-BSU38090.26~2446	77.729	0.159007	0.480603	0.330848	0.740759	0.912133
ILL.walH-BSU40390.1~1368	4041.05	1.28822	0.529578	2.43254	0.0149933	0.0887873
ILL.walK-BSU40400.3~1838	3480.75	1.42079	0.56547	2.51258	0.0119851	0.0763958
ILL.walR-BSU40410.299~1006	3196.36	1.83934	0.635354	2.89498	0.00379179	0.0306824
ILL.wapA-BSU39230.24~7028	117160	-1.5753	0.262727	-5.99595	2.02293e-09	1.86386e-07
ILL.whiA-BSU34750.23~973	3122.89	-0.00630243	0.324137	-0.0194437	0.984487	0.997795
ILL.wprA-BSU10770.19~2703	60188.4	-0.694688	0.263028	-2.64111	0.00826337	0.0579579
ILL.xepA-BSU12780.1~840	116.776	-0.720173	0.453312	-1.58869	0.11213	0.356472
ILL.xerC-BSU16140.1~915	4254.17	0.0814406	0.348491	0.233695	0.815222	0.942691
ILL.xerD-BSU23510.7~897	2847.62	1.7177	0.37777	4.54694	5.44312e-06	0.000119926
ILL.xhlA-BSU12790.1~270	59.2745	-0.538558	0.569601	-0.9455	0.344403	0.653836
ILL.xhlB-BSU12800.1~264	45.6368	-0.474406	0.519956	-0.912398	0.361559	0.668382
ILL.xkdA-BSU12500.126~722	170.214	0.544849	0.443405	1.22878	0.219153	0.511483
ILL.xkdB-BSU12520.1~837	27.1653	-1.81622	0.691666	-2.62586	0.00864303	0.0601009
ILL.xkdC-BSU12530.1~801	38.4738	-1.22448	0.599221	-2.04345	0.0410077	0.185128
ILL.xkdD-BSU12540.1~351	13.8337	-0.598407	0.829673	-0.721256	0.470752	0.754022
ILL.xkdE-BSU12590.1~1488	255.243	-0.766358	0.348505	-2.19899	0.0278789	0.141453
ILL.xkdF-BSU12600.15~842	230.213	-0.570854	0.358157	-1.59387	0.110966	0.355335
ILL.xkdG-BSU12610.26~961	270.716	-0.713222	0.38175	-1.8683	0.0617206	0.249716
ILL.xkdH-BSU12620.1~357	68.2306	-0.65755	0.517263	-1.27121	0.203654	0.494675
ILL.xkdI-BSU12630.1~486	130.824	-0.419267	0.434815	-0.964242	0.334925	0.645335
ILL.xkdJ-BSU12640.1~441	109.15	-0.663068	0.459703	-1.44238	0.149194	0.418094
ILL.xkdK-BSU12650.1~1401	439.703	-0.291371	0.385358	-0.756104	0.449587	0.742893
ILL.xkdM-BSU12660.2~445	159.277	-0.589451	0.435354	-1.35396	0.17575	0.457029
ILL.xkdN-BSU12671.74~520	86.7548	-0.78374	0.459818	-1.70446	0.0882957	0.309378
ILL.xkdO-BSU12680.1~3999	673.504	-0.724761	0.356953	-2.03041	0.042315	0.188718
ILL.xkdP-BSU12690.1~660	85.7831	-0.697647	0.55343	-1.26059	0.207457	0.497926
ILL.xkdQ-BSU12700.1~978	93.8083	-1.37526	0.467681	-2.94059	0.00327583	0.0274385
ILL.xkdR-BSU12710.1~267	14.2495	-1.34211	0.827464	-1.62195	0.104813	0.34212
ILL.xkdS-BSU12720.57~482	36.231	-1.55021	0.647997	-2.39231	0.0167426	0.0970596
ILL.xkdT-BSU12730.1~1047	78.6042	-1.10201	0.495445	-2.22429	0.0261289	0.134767
ILL.xkdU-BSU12740.1~579	56.0469	-1.24344	0.533954	-2.32874	0.0198728	0.110362
ILL.xkdV-BSU12750.1~2064	245.44	-1.58968	0.455381	-3.49088	0.000481425	0.00559226
ILL.xkdW-BSU12760.1~330	37.1082	-1.33665	0.616924	-2.16663	0.030263	0.150351
ILL.xkdX-BSU12770.1~165	13.4428	-1.19159	0.880368	-1.35352	0.175891	0.457091
ILL.xkzA-BSU12749.1~273	28.1135	-1.77167	0.662463	-2.67436	0.00748722	0.0533448
ILL.xkzB-BSU12672.16~165	11.5709	-1.79364	1.39779	-1.2832	0.199421	0.489244
ILL.xlyA-BSU12810.1~894	243.924	-0.312799	0.421803	-0.741575	0.458345	0.74771
ILL.xlyB-BSU12460.121~1074	105.49	0.142174	0.414567	0.342945	0.73164	0.909279
ILL.xpaC-BSU00250.24~638	1090.87	1.48646	0.596352	2.49258	0.0126818	0.0790955
ILL.xpf-BSU12560.1~510	24.2944	-1.74807	0.753998	-2.3184	0.0204274	0.112364
ILL.xpt-BSU22070.89~673	478.444	0.734394	0.434685	1.68949	0.0911262	0.314572
ILL.xre-BSU12510.26~367	620.583	0.420965	0.359356	1.17144	0.241421	0.535991
ILL.xsa-BSU28510.92~1579	309.208	1.41761	0.422684	3.35383	0.000797024	0.00842409
ILL.xseA-BSU24300.128~1474	1865.35	0.436223	0.509763	0.855736	0.392144	0.695215
ILL.xseB-BSU24290.1~255	188.771	0.320859	0.483564	0.66353	0.506991	0.777361
ILL.xtmA-BSU12570.63~860	173.188	-1.08021	0.34959	-3.08994	0.00200195	0.0180008
ILL.xtmB-BSU12580.1~1302	262.153	-1.06815	0.3933	-2.71588	0.00661001	0.0482828
ILL.xtrA-BSU12550.1~207	24.4666	-0.797467	0.644335	-1.23766	0.215842	0.507437
ILL.xylA-BSU17600.66~1403	3117.32	0.215721	0.323585	0.666658	0.504991	0.775761
ILL.xylB-BSU17610.1~1500	1538.77	0.126298	0.396543	0.318498	0.750107	0.915117
ILL.xylR-BSU17590.110~1162	600.914	-0.507431	0.493003	-1.02927	0.303355	0.609416
ILL.xynA-BSU18840.219~860	4097.56	-0.250852	0.287532	-0.872432	0.382973	0.687283
ILL.xynB-BSU17580.7~1608	271.403	0.137954	0.417235	0.330638	0.740918	0.912133
ILL.xynC-BSU18150.1~1269	231.678	-0.606694	0.361445	-1.67852	0.093245	0.319574
ILL.xynD-BSU18160.303~1844	225.085	-0.52279	0.384724	-1.35887	0.174188	0.456466
ILL.xynP-BSU17570.1~1392	174.344	0.32631	0.41072	0.794483	0.426914	0.722936
ILL.yaaA-BSU00030.131~346	996.395	0.0205614	0.325688	0.0631322	0.949661	0.9847
ILL.yaaB-BSU00050.9~254	883.318	-0.14797	0.385993	-0.383348	0.701462	0.895253
ILL.yaaC-BSU00080.121~1068	9.71398	-2.8342	1.1497	-2.46516	0.0136953	0.0831151
ILL.yaaD-BSU00110.4~888	7884.45	-0.279024	0.301088	-0.926719	0.354072	0.663007
ILL.yaaE-BSU00120.22~612	8254.85	-0.43439	0.273008	-1.59112	0.111582	0.355904
ILL.yaaH-BSU00160.70~1353	48.3821	0.42245	0.530281	0.796654	0.425652	0.721704
ILL.yaaI-BSU00170.1~546	14.2708	0.344604	0.804002	0.428611	0.668206	0.880248
ILL.yaaK-BSU00200.24~347	2469.91	0.0175857	0.287815	0.0611007	0.951279	0.984802
ILL.yaaL-BSU00220.1~225	389.696	0.349229	0.335583	1.04066	0.298032	0.602304
ILL.yaaN-BSU00260.1~1161	2423.3	1.4712	0.572026	2.57191	0.010114	0.0674379
ILL.yaaO-BSU00270.46~1488	4547.67	1.28196	0.36918	3.47246	0.000515714	0.00588931
ILL.yaaQ-BSU00290.33~362	1527.52	0.649925	0.351905	1.84688	0.0647649	0.257077
ILL.yaaR-BSU00300.13~453	1391.67	0.555364	0.353007	1.57324	0.115663	0.36097
ILL.yaaT-BSU00320.1~828	4615.17	0.391089	0.364768	1.07216	0.283649	0.588017
ILL.yabA-BSU00330.1~360	2016.36	0.26419	0.377556	0.699738	0.484091	0.763618
ILL.yabB-BSU00340.59~802	1201.8	0.859278	0.464359	1.85046	0.0642471	0.256104
ILL.yabC-BSU00360.1~879	2064.89	0.832503	0.456096	1.82528	0.0679587	0.2644
ILL.yabD-BSU00390.79~846	1148.8	0.18333	0.430244	0.426106	0.67003	0.881161
ILL.yabE-BSU00400.1~1314	5308.59	-0.0760264	0.441215	-0.172311	0.863193	0.956909
ILL.yabG-BSU00430.1~873	371.075	3.47678	0.675146	5.14967	2.60952e-07	9.88691e-06
ILL.yabJ-BSU00480.1~378	4346.38	-0.141715	0.34037	-0.416357	0.677148	0.884458
ILL.yabK-BSU00540.60~290	553.403	0.228342	0.307574	0.742396	0.457847	0.74771
ILL.yabM-BSU00570.50~1648	1149.5	0.83721	0.305334	2.74195	0.00610756	0.0454313
ILL.yabN-BSU00580.1~1470	2678.05	0.0866186	0.26912	0.321858	0.74756	0.915117
ILL.yabO-BSU00590.3~263	677.991	-0.103128	0.286377	-0.360112	0.718763	0.902964
ILL.yabP-BSU00600.79~381	1061.25	-0.148251	0.288199	-0.514405	0.606969	0.845616
ILL.yabQ-BSU00610.1~636	1055.82	0.0468829	0.352025	0.133181	0.894051	0.964623
ILL.yabR-BSU00630.1~387	11535	-0.194451	0.323037	-0.601947	0.54721	0.801697
ILL.yabS-BSU00650.1~738	364.42	1.30929	0.61002	2.14631	0.031848	0.154625
ILL.yabT-BSU00660.1~1017	320.294	1.67967	0.646248	2.59912	0.00934644	0.0632562
ILL.yacD-BSU00720.47~940	2027.83	0.12599	0.384126	0.32799	0.742919	0.91316
ILL.yacK-BSU00880.4~1086	903.333	0.193942	0.463428	0.418494	0.675586	0.883777
ILL.yacL-BSU00890.1~1101	1282.43	0.0864859	0.299653	0.28862	0.772872	0.926715
ILL.yacP-BSU00970.7~519	787.475	-0.707256	0.287951	-2.45617	0.0140425	0.0849678
ILL.yajC-BSU27700.20~286	9410.29	0.800237	0.355288	2.25236	0.0242996	0.128728
ILL.yazA-BSU00350.1~300	316.771	0.667154	0.472707	1.41135	0.158141	0.43143
ILL.yazB-BSU00800.1~210	514.484	-0.00286877	0.313631	-0.00914694	0.992702	0.998069
ILL.ybaC-BSU01140.12~968	3056.04	2.68261	0.322473	8.31886	8.88145e-17	3.27322e-14
ILL.ybaF-BSU01470.1~798	2809.83	1.05284	0.449324	2.34315	0.0191215	0.10696
ILL.ybaJ-BSU01510.16~783	1374.65	-0.1675	0.407887	-0.410652	0.681328	0.886386
ILL.ybaK-BSU01520.1~444	18.9609	0.610267	0.933672	0.653621	0.513356	0.781153
ILL.ybaN-BSU01570.75~839	2.67548	-0.689508	1.84017	-0.374699	0.707885	0.896241
ILL.ybaR-BSU01580.129~1565	2683.92	0.285896	0.476364	0.600163	0.548398	0.801905
ILL.ybaS-BSU01590.82~1002	1078.07	0.855739	0.290691	2.94381	0.00324201	0.0272114
ILL.ybbA-BSU01600.1~753	307.833	-0.222949	0.310781	-0.717383	0.473138	0.755455
ILL.ybbB-BSU01640.12~1601	1109.77	0.520832	0.50269	1.03609	0.30016	0.606
ILL.ybbC-BSU01650.14~1258	96.8347	-1.97215	0.458003	-4.30597	1.66252e-05	0.000310592
ILL.ybbD-BSU01660.1~1929	133.962	-1.89029	0.396175	-4.77136	1.82988e-06	4.82026e-05
ILL.ybbE-BSU01670.33~1358	95.2022	-2.16739	0.499389	-4.34009	1.42424e-05	0.000269807
ILL.ybbF-BSU01680.25~1392	171.292	-0.49145	0.675565	-0.727465	0.466941	0.751182
ILL.ybbH-BSU01690.1~852	284.189	-0.178339	0.717791	-0.248456	0.803782	0.937432
ILL.ybbJ-BSU01710.1~483	62.4162	-0.438729	0.678114	-0.646984	0.517642	0.785274
ILL.ybbK-BSU01720.17~472	123.054	0.0359538	0.577142	0.0622963	0.950327	0.9847
ILL.ybbP-BSU01750.65~886	2445.06	1.15025	0.27779	4.1407	3.46243e-05	0.000580029
ILL.ybbR-BSU01760.1~1452	5870.14	0.588147	0.347211	1.69392	0.0902814	0.31404
ILL.ybcC-BSU01845.1~2616	227.878	-0.135876	0.4435	-0.306373	0.759321	0.918234
ILL.ybcF-BSU01860.1~528	66.8849	-0.177792	0.565408	-0.31445	0.75318	0.916934
ILL.ybcH-BSU01870.23~313	30.6173	-0.487671	0.780088	-0.625149	0.531873	0.793635
ILL.ybcI-BSU01880.33~407	124.104	-0.534786	0.517854	-1.0327	0.301746	0.607991
ILL.ybcL-BSU01890.1~1173	240.166	-0.0275814	0.32291	-0.0854153	0.931931	0.979528
ILL.ybcM-BSU01900.1~315	7.06415	0.127684	1.17873	0.108323	0.913739	0.974046
ILL.ybdG-BSU01990.54~1031	134.059	-0.140291	0.384542	-0.364826	0.715241	0.900493
ILL.ybdJ-BSU02000.2~673	73.3877	-0.593794	0.587987	-1.00988	0.312555	0.616896
ILL.ybdK-BSU02010.21~983	148.42	-0.447655	0.428753	-1.04408	0.296446	0.601498
ILL.ybdM-BSU02030.9~779	167.98	0.131719	0.42298	0.311407	0.755492	0.917182
ILL.ybdN-BSU02040.3~860	109.669	-0.239524	0.451201	-0.530858	0.595517	0.837111
ILL.ybdO-BSU02050.16~1200	396.791	-1.28132	0.306657	-4.17835	2.93626e-05	0.000506536
ILL.ybdZ-BSU31959.16~225	108.6	-2.44809	0.558956	-4.37975	1.18813e-05	0.000229366
ILL.ybeC-BSU02120.30~1649	5148.84	-0.785239	0.507517	-1.54722	0.121811	0.371295
ILL.ybeF-BSU02150.174~422	19.0445	0.431693	0.751025	0.574805	0.565423	0.816029
ILL.ybfA-BSU02160.12~929	80.9317	0.262689	0.67987	0.386381	0.699214	0.895253
ILL.ybfB-BSU02170.1~1251	164.661	0.262319	0.514254	0.510095	0.609985	0.846296
ILL.ybfE-BSU02180.124~408	243.805	-0.92119	0.815637	-1.12941	0.258724	0.5588
ILL.ybfF-BSU02190.5~916	517.557	-1.07567	0.718346	-1.49743	0.134281	0.391263
ILL.ybfG-BSU02200.75~2273	812.173	-0.0577044	0.303319	-0.190243	0.849118	0.953553
[truncated: 2,237 more rows]

## Sheet: NusA depletion nusG deletion
Transcript	baseMean	log2FoldChange	lfcSE	stat	pvalue	padj
ILL.aadK-BSU26790.74~928	325.789	-0.511004	0.62398	-0.818942	0.41282	0.58968
ILL.aapA-BSU27090.37~1425	1204.66	-0.544972	0.569171	-0.957484	0.338323	0.51627
ILL.abfA-BSU28720.1~1503	70.0984	0.318073	0.687181	0.462866	0.64346	0.782235
ILL.abh-BSU14480.27~305	1414.92	-3.81341	0.900315	-4.23564	2.27903e-05	0.000177482
ILL.abnA-BSU28810.1~972	102.607	3.78859	0.909147	4.16719	3.08377e-05	0.000230199
ILL.abnB-BSU39330.134~1543	39.8091	-1.23602	0.691007	-1.78873	0.0736587	0.176398
ILL.abrB-BSU00370.67~357	9120.97	1.85667	0.515791	3.59966	0.000318635	0.00183603
ILL.accA-BSU29200.1~978	6116.08	-1.37083	0.458152	-2.99209	0.00277072	0.0121859
ILL.accB-BSU24350.58~537	3306.06	-1.01845	0.458577	-2.2209	0.0263577	0.0781117
ILL.accC-BSU24340.12~1364	11308.6	-1.14887	0.455006	-2.52496	0.0115711	0.0399161
ILL.accD-BSU29210.335~1207	6509.22	-1.17791	0.458099	-2.57131	0.0101316	0.0357639
ILL.acdA-BSU37170.1~1140	1517.5	3.88452	1.002	3.87675	0.000105862	0.000689603
ILL.ackA-BSU29470.82~1269	24538.2	-1.65561	0.708309	-2.33742	0.0194173	0.0611757
ILL.acoA-BSU08060.1~1002	116.756	5.63116	0.729473	7.71949	1.16797e-14	4.20774e-13
ILL.acoB-BSU08070.1~1029	135.762	4.87736	0.662489	7.36217	1.80948e-13	5.51227e-12
ILL.acoC-BSU08080.1~1197	225.189	2.98416	0.533477	5.5938	2.22148e-08	3.26369e-07
ILL.acoL-BSU08090.21~1397	305.422	2.77054	0.644586	4.29818	1.7221e-05	0.000138537
ILL.acoR-BSU08100.1~1818	2465.87	2.96728	0.975806	3.04085	0.00235911	0.0106193
ILL.acpK-BSU17130.1~249	1.53227	0.369783	2.68657	0.137641	0.890524	NA
ILL.acpP-BSU15920.3~236	13737.7	-0.837548	0.490598	-1.7072	0.0877856	0.198632
ILL.acpS-BSU04620.42~407	232.335	-0.0119262	0.595823	-0.0200164	0.98403	0.990967
ILL.acsA-BSU29680.16~1734	2387.05	1.1847	0.713175	1.66116	0.0966815	0.214543
ILL.acuA-BSU29690.23~655	1007.28	0.881837	0.693849	1.27094	0.203752	0.363737
ILL.acuB-BSU29700.27~671	1092.06	0.766024	0.690096	1.11003	0.266988	0.441922
ILL.acuC-BSU29710.1~1164	1453.91	0.539016	0.71995	0.748685	0.454047	0.626131
ILL.adaA-BSU01810.111~746	77.1212	1.65638	0.673953	2.4577	0.0139828	0.0465307
ILL.adaB-BSU01820.1~540	1228.85	-0.451161	0.667209	-0.676191	0.49892	0.663997
ILL.adcA-BSU02850.34~993	1152.11	-0.297991	0.53292	-0.559166	0.576048	0.726938
ILL.adcB-BSU02870.1~843	904.657	1.26836	0.510183	2.48609	0.0129157	0.0435746
ILL.adcC-BSU02860.56~751	1199.57	1.40678	0.485365	2.8984	0.00375076	0.0157921
ILL.addA-BSU10630.1~3699	1833.23	-1.30059	0.473941	-2.74421	0.00606566	0.0235095
ILL.addB-BSU10620.11~3511	1551.62	0.0341165	0.550939	0.0619242	0.950623	0.972212
ILL.adeC-BSU14520.13~1746	10518.3	0.757415	0.675008	1.12208	0.261827	0.436168
ILL.adhA-BSU27010.59~1108	183.14	0.0804395	0.605883	0.132764	0.89438	0.942854
ILL.adhB-BSU26970.1~1137	11.8117	1.07151	1.06823	1.00306	0.31583	0.492069
ILL.adk-BSU01370.55~708	32919.2	-3.37321	0.693756	-4.86223	1.16069e-06	1.26213e-05
ILL.ahpC-BSU40090.345~908	26827.2	0.829085	0.510826	1.62303	0.104583	0.225692
ILL.ahpF-BSU40100.14~1543	55103.1	0.620881	0.551724	1.12535	0.260442	0.43491
ILL.ahrC-BSU24250.98~547	1082.07	0.560784	0.521289	1.07576	0.282033	0.459482
ILL.alaS-BSU27410.80~2716	9539.75	0.0989307	0.635803	0.1556	0.876349	0.929998
ILL.alaT-BSU31400.1~1161	2925.4	-2.094	0.461931	-4.53314	5.81141e-06	5.23406e-05
ILL.albA-BSU37370.1~1347	533.094	-0.650215	0.509803	-1.27542	0.202159	0.362574
ILL.albB-BSU37380.1~162	23.1377	-0.458769	0.789765	-0.580893	0.561313	0.715078
ILL.albC-BSU37390.1~720	193.594	-0.834095	0.510741	-1.63311	0.102446	0.22245
ILL.albD-BSU37400.1~1311	219.439	-1.02434	0.524239	-1.95396	0.0507055	0.132874
ILL.albE-BSU37410.1~1161	100.024	-1.0657	0.554315	-1.92256	0.0545357	0.140474
ILL.albF-BSU37420.5~1285	66.5162	-0.931574	0.65037	-1.43237	0.152037	0.296279
ILL.albG-BSU37430.1~702	20.908	-1.32058	0.842471	-1.56751	0.116996	0.246926
ILL.ald-BSU31930.15~1151	23048.1	0.988846	1.07927	0.91622	0.359551	0.539131
ILL.aldX-BSU39860.1~1338	175.79	-0.811343	0.520316	-1.55933	0.118919	0.249966
ILL.aldY-BSU38830.1~1458	75.5275	1.38248	0.778586	1.77563	0.0757946	0.178723
ILL.alkA-BSU01800.26~937	266.428	-0.932781	0.501975	-1.85822	0.0631376	0.156728
ILL.alrA-BSU04640.20~1189	1902.85	-0.81327	0.491916	-1.65327	0.0982759	0.216929
ILL.alrB-BSU17640.457~1641	19.1262	0.113942	0.883589	0.128953	0.897395	0.94507
ILL.alsD-BSU36000.62~829	746.956	0.463837	0.474287	0.977968	0.32809	0.50537
ILL.alsR-BSU36020.21~929	296.087	0.303459	0.569304	0.533034	0.59401	0.740813
ILL.alsS-BSU36010.2~1714	438.097	-0.288052	0.478244	-0.602311	0.546967	0.703899
ILL.alsT-BSU18120.45~1442	7673.32	-0.106587	0.456512	-0.233482	0.815387	0.892745
ILL.amhX-BSU03010.50~1201	80.2878	0.563869	0.600852	0.938449	0.348014	0.52756
ILL.ampS-BSU14450.14~1246	1961.05	-0.0282019	0.536764	-0.0525406	0.958098	0.975398
ILL.amtB-BSU36510.23~1237	78.025	0.103055	0.69393	0.148509	0.881941	0.93378
ILL.amyC-BSU30290.1~831	245.606	4.32059	0.977644	4.41939	9.89813e-06	8.40327e-05
ILL.amyD-BSU30280.1~912	253.758	4.40999	1.00831	4.37364	1.2219e-05	0.000101653
ILL.amyE-BSU03040.1~1980	1531.17	1.30972	0.589982	2.21993	0.0264234	0.0782502
ILL.amyX-BSU29930.6~2162	1161.73	-1.26632	0.465531	-2.72017	0.00652486	0.0249838
ILL.ansA-BSU23580.146~1135	6811.62	-3.24479	0.579449	-5.59978	2.1463e-08	3.16445e-07
ILL.ansR-BSU23590.29~379	536.955	-1.50359	0.52951	-2.83959	0.00451709	0.0183474
ILL.ansZ-BSU02690.15~1142	69.1084	-0.190119	0.620891	-0.306203	0.75945	0.861344
ILL.antE-BSU25220.1~297	11.3685	0.36129	1.08348	0.333453	0.738792	0.848598
ILL.appB-BSU11390.87~1037	74.8229	-0.188867	0.622985	-0.303165	0.761764	0.862527
ILL.appC-BSU11400.1~912	59.6263	-0.491542	0.644026	-0.763232	0.445325	0.61986
ILL.appD-BSU11360.1~987	25.893	-0.317871	0.834825	-0.380764	0.703378	0.824122
ILL.appF-BSU11370.1~990	186.46	-0.817015	0.728733	-1.12114	0.262226	0.436657
ILL.aprE-BSU10300.27~1172	74.1117	0.0620277	0.75022	0.0826793	0.934107	0.962209
ILL.aprX-BSU17260.30~1358	68.5442	2.45996	0.666197	3.69255	0.000222017	0.00134253
ILL.apt-BSU27610.6~518	3076.64	-0.930229	0.555855	-1.67351	0.0942271	0.210122
ILL.araA-BSU28800.1~1491	201.991	0.923293	0.714413	1.29238	0.196226	0.355006
ILL.araB-BSU28790.1~1683	131.944	0.519804	0.715483	0.726508	0.467527	0.638359
ILL.araD-BSU28780.1~690	42.3919	0.578817	0.878263	0.659048	0.509865	0.673588
ILL.araE-BSU33960.1~1395	215.023	1.77618	0.910201	1.95141	0.0510082	0.133414
ILL.araL-BSU28770.1~819	44.4446	0.310888	0.814644	0.381625	0.70274	0.82384
ILL.araM-BSU28760.1~1185	56.589	0.595579	0.765875	0.777645	0.436778	0.61217
ILL.araN-BSU28750.1~1302	61.5983	0.544086	0.795497	0.683957	0.494002	0.659997
ILL.araP-BSU28740.1~942	21.7864	0.545213	0.894715	0.609371	0.542279	0.699894
ILL.araQ-BSU28730.1~846	15.8306	0.709821	0.937133	0.757439	0.448787	0.621985
ILL.araR-BSU33970.1~1155	1393.96	0.691121	0.505683	1.36671	0.171717	0.322934
ILL.arfM-BSU37290.1~477	4.21883	-0.279455	1.71476	-0.16297	0.870542	0.927638
ILL.argB-BSU11210.15~791	3.4632	-2.02467	1.96317	-1.03133	0.302387	0.478165
ILL.argC-BSU11190.19~1056	47.0086	0.779545	0.685402	1.13735	0.25539	0.429068
ILL.argD-BSU11220.1~1158	8.16803	-0.787924	1.17895	-0.668328	0.503924	0.668296
ILL.argF-BSU11250.1~960	59.1213	-0.159871	0.622612	-0.256776	0.797352	0.882798
ILL.argG-BSU29450.14~1225	564.041	1.66323	0.842989	1.97302	0.0484936	0.128376
ILL.argH-BSU29440.1~1386	597.394	1.32101	0.836776	1.57869	0.114407	0.242574
ILL.argI-BSU40320.54~944	1588.13	0.206485	0.583332	0.353975	0.723358	0.83852
ILL.argJ-BSU11200.20~1240	26.2541	-0.485084	0.87059	-0.55719	0.577397	0.726965
ILL.argS-BSU37330.1~1671	7281.89	-1.03372	0.483193	-2.13934	0.032408	0.0932405
ILL.aroA-BSU29750.140~1216	14936	0.445598	0.553743	0.804703	0.420991	0.597932
ILL.aroB-BSU22700.1~1089	5484.2	1.79529	0.533443	3.36549	0.000764092	0.00397194
ILL.aroD-BSU23080.86~853	1539.21	0.965886	0.489509	1.97317	0.0484761	0.128376
ILL.aroE-BSU22600.1~1287	3347.11	-1.3666	0.464301	-2.94334	0.0032469	0.0139543
ILL.aroE-BSU25660.18~860	2812.76	-1.02282	0.57393	-1.78213	0.0747283	0.177319
ILL.aroF-BSU22710.3~1175	7247.79	2.19905	0.511559	4.29872	1.71784e-05	0.000138463
ILL.aroH-BSU22690.1~384	1872.46	1.15389	0.494642	2.33278	0.0196597	0.061658
ILL.aroK-BSU03150.117~677	789.316	0.31363	0.498692	0.628906	0.52941	0.690166
ILL.arsB-BSU25790.23~1063	209.618	-0.417802	0.527146	-0.792574	0.428026	0.603989
ILL.arsC-BSU25780.12~431	131.291	-0.62048	0.536907	-1.15566	0.247822	0.420789
ILL.arsR-BSU25810.11~328	94.7254	-0.120952	0.604452	-0.200102	0.841401	0.909161
ILL.artP-BSU23980.38~805	449.638	-1.44505	0.809355	-1.78543	0.0741911	0.17655
ILL.artQ-BSU23970.70~729	175.003	-0.648585	0.641869	-1.01046	0.312274	0.488392
ILL.artR-BSU23960.1~723	334.55	-0.713861	0.620132	-1.15114	0.249673	0.422547
ILL.asd-BSU16750.57~1097	11296.3	0.362791	0.482827	0.751388	0.452419	0.624965
ILL.aseR-BSU05330.44~379	55.416	-0.928661	0.628145	-1.47842	0.139296	0.278963
ILL.aslA-BSU39900.1~270	2.15493	-1.15595	2.50635	-0.461208	0.644649	0.782991
ILL.asnB-BSU30540.150~2048	18494.6	-0.676671	0.601889	-1.12425	0.260909	0.435221
ILL.asnC-BSU22360.1~1293	18512.4	-0.576764	0.464203	-1.24248	0.214058	0.376601
ILL.asnH-BSU39920.1~2244	162.246	-0.178852	0.572596	-0.312353	0.754772	0.857852
ILL.asnO-BSU10790.1~1845	131.207	2.12692	0.99934	2.12833	0.0333098	0.0952512
ILL.aspA-BSU23570.45~1472	10573.1	-3.32752	0.569848	-5.83931	5.2419e-09	8.72177e-08
ILL.aspB-BSU22370.23~1204	13245.4	-0.711401	0.453953	-1.56713	0.117085	0.246988
ILL.aspS-BSU27550.1~1779	4373.07	-0.801015	0.746432	-1.07313	0.283215	0.460461
ILL.atpA-BSU36830.17~1525	34425.2	-1.14803	0.491944	-2.33365	0.0196138	0.0616061
ILL.atpB-BSU36870.1~735	19768.7	-1.02216	0.485673	-2.10462	0.0353246	0.0995578
ILL.atpC-BSU36800.24~422	8066.19	-1.70406	0.484605	-3.51638	0.000437471	0.00243608
ILL.atpD-BSU36810.26~1447	30148	-1.85133	0.490608	-3.77354	0.000160948	0.00100574
ILL.atpE-BSU36860.46~258	7091.71	-1.07268	0.478505	-2.24173	0.0249791	0.0746147
ILL.atpF-BSU36850.4~516	11666	-1.21188	0.539218	-2.24748	0.0246096	0.0741368
ILL.atpG-BSU36820.1~864	15755.8	-1.77749	0.547627	-3.2458	0.00117121	0.0058251
ILL.atpH-BSU36840.1~546	11197.6	-1.21295	0.564048	-2.15044	0.0315202	0.0910021
ILL.atpI-BSU36880.271~654	5451.41	-0.702407	0.517113	-1.35833	0.17436	0.3258
ILL.azlB-BSU26720.1~474	123.415	-0.335656	0.556283	-0.603392	0.546248	0.703483
ILL.azlC-BSU26710.1~765	174.143	-0.398996	0.52489	-0.760152	0.447164	0.621052
ILL.azlD-BSU26700.1~333	78.4991	-0.209018	0.575284	-0.363331	0.716358	0.833672
ILL.bacA-BSU37740.5~619	38.2006	0.929919	0.86697	1.07261	0.283447	0.460461
ILL.bacB-BSU37730.1~708	51.9722	-0.140207	0.793688	-0.176652	0.859781	0.920575
ILL.bacC-BSU37720.1~768	64.5169	-0.726577	0.747787	-0.971636	0.331232	0.50901
ILL.bacD-BSU37710.1~1419	158.508	-1.26515	0.627852	-2.01504	0.0439009	0.118335
ILL.bacE-BSU37700.1~1185	118.653	-2.43212	0.598232	-4.06551	4.79268e-05	0.000341757
ILL.bcd-BSU24080.12~1106	2088	0.39081	0.553638	0.705895	0.480253	0.648318
ILL.bceA-BSU30380.102~863	91.671	0.38057	0.600941	0.63329	0.526545	0.687728
ILL.bceB-BSU30370.1~1941	189.61	0.102136	0.544908	0.187438	0.851317	0.916106
ILL.bceR-BSU30400.61~756	215.289	-0.657054	0.558462	-1.17654	0.239379	0.410661
ILL.bceS-BSU30390.1~1005	379.76	-0.863048	0.531526	-1.62372	0.104436	0.225692
ILL.bcrC-BSU36530.9~590	790.697	-1.81034	0.824557	-2.19553	0.0281259	0.0827595
ILL.bcsA-BSU22050.74~1171	35.534	2.52553	0.961425	2.62686	0.00861765	0.0313184
ILL.bdbA-BSU21460.1~414	83.0362	-4.16701	0.72059	-5.78278	7.34772e-09	1.1845e-07
ILL.bdbB-BSU21440.1~447	129.27	-2.20524	0.604303	-3.64923	0.000263023	0.00155895
ILL.bdbC-BSU33470.5~421	2385.34	-0.422254	0.578857	-0.729461	0.46572	0.636791
ILL.bdbD-BSU33480.1~669	3919.72	-0.495731	0.544577	-0.910305	0.362662	0.542421
ILL.bdhA-BSU06240.263~1303	15886	-0.392395	0.732368	-0.535789	0.592104	0.73955
ILL.besA-BSU32010.59~928	1011.17	-1.32413	0.487951	-2.71366	0.00665439	0.0253626
ILL.bglA-BSU40110.14~1453	1422.53	0.979928	0.646619	1.51546	0.129655	0.267355
ILL.bglC-BSU03410.1~1434	291.805	1.78733	0.598093	2.98839	0.00280452	0.0123084
ILL.bglH-BSU39260.23~1432	11522.4	2.11731	0.641653	3.29978	0.00096762	0.00490079
ILL.bglP-BSU39270.2~1831	24053.5	3.26183	0.624361	5.22427	1.74847e-07	2.20851e-06
ILL.bglS-BSU39070.93~821	778.264	2.43377	0.740826	3.28522	0.00101903	0.00513608
ILL.bhlA-BSU21420.1~213	0.921151	-0.152044	3.77106	-0.0403186	0.967839	NA
ILL.bhlB-BSU21430.1~267	1.92157	-0.566359	2.14655	-0.263846	0.791898	0.880052
ILL.bioA-BSU30230.1~1347	33.5176	0.497801	0.701976	0.709143	0.478236	0.647282
ILL.bioB-BSU30200.1~1008	16.5913	-0.696923	0.900048	-0.774318	0.438743	0.614092
ILL.bioD-BSU30210.1~696	10.1112	-1.33291	1.13764	-1.17164	0.241341	0.412877
ILL.bioF-BSU30220.1~1170	23.7238	0.398653	0.783035	0.509113	0.610673	0.754364
ILL.bioI-BSU30190.69~1256	23.6874	-0.369107	0.827631	-0.44598	0.655612	0.789673
ILL.bioW-BSU30240.21~797	22.7526	0.570838	0.85021	0.671408	0.50196	0.666332
ILL.bioY-BSU10370.12~572	15.1458	1.20129	0.946601	1.26905	0.204422	0.364423
ILL.bioYB-BSU32030.6~608	343.919	1.45302	0.642576	2.26124	0.0237441	0.0718567
ILL.bipA-BSU14770.10~1848	20329.3	-1.18937	0.555043	-2.14284	0.0321263	0.0926229
ILL.birA-BSU22440.1~978	1239.62	-1.02719	0.543121	-1.89127	0.0585887	0.147918
ILL.bkdAA-BSU24050.22~1014	1395.39	-1.32361	0.507863	-2.60622	0.00915463	0.0329519
ILL.bkdAB-BSU24040.14~997	1540.93	-1.42376	0.502058	-2.83584	0.00457046	0.0184916
ILL.bkdB-BSU24030.1~1275	2332.51	-1.42276	0.56191	-2.53201	0.0113411	0.0393188
ILL.bkdR-BSU24100.50~2128	3113.51	1.25736	0.558296	2.25214	0.0243137	0.0734195
ILL.blt-BSU26590.10~1212	42.2312	0.0817747	0.705323	0.115939	0.907701	0.950367
ILL.bltD-BSU26600.1~459	22.2097	-0.560493	0.799015	-0.70148	0.483003	0.650336
ILL.bltR-BSU26580.4~825	119.94	0.654854	0.712779	0.918734	0.358235	0.537814
ILL.blyA-BSU21410.1~1104	1.2018	2.11951	3.01539	0.702898	0.482119	NA
ILL.bmr-BSU24010.1~1170	514.526	0.384612	0.570031	0.674721	0.499853	0.664812
ILL.bmrA-BSU34820.53~1822	2053.61	-0.328039	0.487648	-0.672696	0.501141	0.665671
ILL.bmrR-BSU24020.4~840	208.999	0.979716	0.643333	1.52288	0.12779	0.264189
ILL.bmrU-BSU24000.12~905	21.1685	4.87953	1.21441	4.01804	5.8685e-05	0.000408625
ILL.bofA-BSU00230.66~329	292.501	2.62146	0.573884	4.56792	4.9258e-06	4.49506e-05
ILL.bofC-BSU27750.48~560	128.46	0.594402	0.567019	1.04829	0.294504	0.469289
ILL.bpr-BSU15300.63~4364	852.643	3.07368	0.596889	5.14951	2.61169e-07	3.19181e-06
ILL.braB-BSU29600.88~1425	1737.15	-0.767964	0.512314	-1.49901	0.133871	0.272812
ILL.brnQ-BSU26690.165~1487	376.613	-0.697819	0.575563	-1.21241	0.225355	0.39163
ILL.bsaA-BSU21900.124~606	118.857	0.187098	0.592828	0.315602	0.752305	0.856305
ILL.bscR-BSU27170.172~756	142.166	-0.668751	0.557179	-1.20024	0.230045	0.397943
ILL.bsdD-BSU03651.1~228	12.2266	-0.934644	1.0335	-0.904345	0.365813	0.54497
ILL.bsn-BSU32540.14~880	198.355	0.341584	0.759771	0.449588	0.653008	0.78806
ILL.BSU-misc-RNA-1-extra.1~213	2090.15	-0.243847	0.533511	-0.457061	0.647627	0.784538
ILL.BSU-misc-RNA-10-extra.1~103	6.662	-2.19863	1.50463	-1.46124	0.143949	0.285219
ILL.BSU-misc-RNA-11-extra.1~108	10.7974	1.51598	1.14491	1.32411	0.185468	0.339997
ILL.BSU-misc-RNA-12-extra.1~118	74.3438	1.21617	1.23624	0.983766	0.325231	0.502773
ILL.BSU-misc-RNA-13-extra.1~215	1770.13	0.184634	0.5053	0.365394	0.714817	0.83255
ILL.BSU-misc-RNA-14-extra.1~109	21.5964	0.161567	0.858653	0.188163	0.850749	0.915732
ILL.BSU-misc-RNA-15-extra.1~121	10.1159	2.21143	1.89324	1.16807	0.242779	0.414435
ILL.BSU-misc-RNA-16-extra.1~112	109.477	1.0993	0.980755	1.12087	0.262343	0.436676
ILL.BSU-misc-RNA-17-extra.1~211	3706.66	1.69734	0.662294	2.56281	0.0103828	0.0365782
ILL.BSU-misc-RNA-18-extra.1~156	733.21	2.58269	0.934593	2.76343	0.00571968	0.0224188
ILL.BSU-misc-RNA-19-extra.1~113	87.6221	1.35338	1.17268	1.15409	0.248464	0.421533
ILL.BSU-misc-RNA-20-extra.1~157	697.339	2.50424	0.79893	3.1345	0.00172149	0.00806804
ILL.BSU-misc-RNA-21-extra.1~101	0.347684	1.93374	4.95974	0.389887	0.69662	NA
ILL.BSU-misc-RNA-22-extra.1~45	0.424358	2.35	4.92147	0.477499	0.633007	NA
ILL.BSU-misc-RNA-23-extra.1~121	2.97644	2.39931	2.04209	1.17493	0.240023	0.411595
ILL.BSU-misc-RNA-24-extra.1~102	2.33629	-0.703563	2.05606	-0.342189	0.732208	0.84478
ILL.BSU-misc-RNA-25-extra.1~227	3266.08	0.147551	0.504514	0.292462	0.769933	0.866332
ILL.BSU-misc-RNA-26-extra.1~117	143.259	0.178751	0.635871	0.281112	0.778624	0.871613
ILL.BSU-misc-RNA-27-extra.1~118	53.4785	-1.48296	0.645433	-2.29762	0.0215833	0.0661877
ILL.BSU-misc-RNA-28-extra.1~115	79.7742	-2.29585	0.7812	-2.93887	0.00329409	0.0141278
ILL.BSU-misc-RNA-29-extra.1~106	5.35216	-0.125183	1.40285	-0.0892344	0.928896	0.960663
ILL.BSU-misc-RNA-3-extra.1~141	2630.48	-1.78531	0.47595	-3.75106	0.000176092	0.00108564
ILL.BSU-misc-RNA-30-extra.1~42	4.86281	4.27872	2.06175	2.07529	0.0379601	0.105691
ILL.BSU-misc-RNA-31-extra.1~92	0.212179	1.57234	4.97995	0.315735	0.752204	NA
ILL.BSU-misc-RNA-32-extra.1~187	48052.2	1.83244	0.89589	2.04539	0.0408166	0.111619
ILL.BSU-misc-RNA-34-extra.1~101	0.92655	-1.47256	3.26042	-0.451647	0.651523	NA
ILL.BSU-misc-RNA-36-extra.1~145	643.341	-0.170778	0.763467	-0.223688	0.823	0.897758
ILL.BSU-misc-RNA-37-extra.1~98	9.26314	0.155086	1.38793	0.111739	0.91103	0.951577
ILL.BSU-misc-RNA-38-extra.1~102	8.10678	0.352925	1.41123	0.250083	0.802523	0.885681
ILL.BSU-misc-RNA-39-extra.1~175	2632.59	0.439359	0.517803	0.848506	0.396156	0.572671
ILL.BSU-misc-RNA-4-extra.1~57	0.217577	-1.19082	4.99266	-0.238515	0.811482	NA
ILL.BSU-misc-RNA-40-extra.1~208	1164.28	-0.00455044	0.614807	-0.00740142	0.994095	0.996808
ILL.BSU-misc-RNA-41-extra.1~193	11317.1	0.966176	0.904916	1.0677	0.285657	0.461935
ILL.BSU-misc-RNA-42-extra.1~233	3912.74	0.351132	0.462763	0.758773	0.447988	0.621573
ILL.BSU-misc-RNA-43-extra.1~76	18.5755	-0.329295	0.869366	-0.378776	0.704854	0.825606
ILL.BSU-misc-RNA-44-extra.1~223	3376.97	0.58592	0.634763	0.923053	0.35598	0.536083
ILL.BSU-misc-RNA-45-extra.1~247	103.581	-0.188005	0.568785	-0.330538	0.740994	0.850163
ILL.BSU-misc-RNA-46-extra.1~180	1275.94	-0.230991	0.576896	-0.400404	0.688859	0.813089
ILL.BSU-misc-RNA-47-extra.1~131	533.333	0.939947	0.67833	1.38568	0.165845	0.314461
ILL.BSU-misc-RNA-48-extra.1~248	1287.47	-0.312331	0.530652	-0.588579	0.556143	0.711997
ILL.BSU-misc-RNA-49-extra.1~215	4347.59	0.791623	0.692436	1.14324	0.252938	0.426784
ILL.BSU-misc-RNA-5-extra.1~171	3386.45	3.16743	1.08451	2.92062	0.00349339	0.0148595
ILL.BSU-misc-RNA-50-extra.1~139	1463.74	-0.883199	0.494405	-1.78639	0.0740365	0.17653
ILL.BSU-misc-RNA-51-extra.1~102	3.02086	1.03132	2.138	0.482377	0.629538	0.769601
ILL.BSU-misc-RNA-52-extra.1~149	242.281	-1.39462	0.554398	-2.51556	0.0118843	0.0407587
ILL.BSU-misc-RNA-53-extra.1~107	33.5991	1.97038	1.07767	1.82836	0.0674952	0.165061
ILL.BSU-misc-RNA-54-extra.1~180	685.522	0.853348	0.570552	1.49565	0.134744	0.274457
ILL.BSU-misc-RNA-56-extra.1~236	370.05	-0.0686315	0.546965	-0.125477	0.900146	0.945539
ILL.BSU-misc-RNA-57-extra.1~222	63.9274	-0.390504	1.42182	-0.274651	0.783584	0.874566
ILL.BSU-misc-RNA-58-extra.1~222	303.946	-0.71145	0.709769	-1.00237	0.316166	0.492199
ILL.BSU-misc-RNA-59-extra.1~207	57.0415	-0.165657	0.624131	-0.26542	0.790686	0.879488
ILL.BSU-misc-RNA-6-extra.1~248	576.748	-0.0497246	0.471864	-0.105379	0.916075	0.954792
ILL.BSU-misc-RNA-60-extra.1~103	119.99	-0.775799	0.724782	-1.07039	0.284444	0.461595
ILL.BSU-misc-RNA-61-extra.1~107	2.06889	1.74205	2.29085	0.760438	0.446993	0.621052
ILL.BSU-misc-RNA-62-extra.1~107	0.496794	-2.30551	4.88621	-0.47184	0.637041	NA
ILL.BSU-misc-RNA-63-extra.1~103	5.85217	-0.95511	1.37827	-0.692978	0.488324	0.654521
ILL.BSU-misc-RNA-7-extra.1~144	1179.5	-1.62745	0.626173	-2.59905	0.00934835	0.0335617
ILL.BSU-misc-RNA-8-extra.1~101	51.4384	-1.48943	0.712017	-2.09184	0.0364525	0.10225
ILL.BSU-misc-RNA-9-extra.1~103	4.65974	-5.54282	2.15348	-2.57389	0.0100563	0.0355617
ILL.buk-BSU24070.4~1095	1478.02	-0.08543	0.544951	-0.156766	0.875429	0.929737
ILL.cah-BSU03180.1~957	406.273	-1.21314	0.498166	-2.43522	0.0148828	0.048936
ILL.carA-BSU11230.1~1062	4.21522	-1.67768	1.61534	-1.03859	0.298994	0.474792
ILL.carB-BSU11240.1~3093	35.3458	-1.1008	0.743416	-1.48073	0.138678	0.278329
ILL.carB-BSU15520.1~3216	4745.75	-3.31026	0.679202	-4.87375	1.09501e-06	1.197e-05
ILL.catD-BSU08230.21~425	229.219	0.975298	0.554632	1.75846	0.0786695	0.183932
ILL.catE-BSU08240.1~858	666.802	1.17763	0.520137	2.26408	0.0235694	0.0715371
ILL.cbiO-BSU01450.128~973	1668.83	-0.651098	0.548087	-1.18795	0.234855	0.404575
ILL.cbiO-BSU01460.15~845	1431.15	-0.745315	0.612769	-1.21631	0.223868	0.390192
ILL.cca-BSU22450.5~1198	1405.32	-0.858295	0.509857	-1.6834	0.0922971	0.207031
ILL.cccA-BSU25190.32~394	558.25	2.31581	0.606349	3.81926	0.000133854	0.000847945
ILL.cccB-BSU35270.8~346	1696.5	0.0671273	0.48911	0.137244	0.890838	0.94004
ILL.ccdA-BSU17930.86~793	1129.91	3.12116	0.603456	5.17214	2.3143e-07	2.86214e-06
ILL.ccpA-BSU29740.151~1155	7041	-0.0354821	0.514789	-0.0689255	0.945049	0.968283
ILL.ccpB-BSU40870.44~979	681.874	3.98229	0.83215	4.78554	1.70526e-06	1.76182e-05
ILL.ccpC-BSU14140.25~906	3159.78	1.2147	0.45651	2.66085	0.00779448	0.0286281
ILL.ccpN-BSU25250.133~771	3615.67	1.50668	0.653228	2.30652	0.0210818	0.0649382
ILL.cdd-BSU25300.1~411	2016.73	0.976096	0.514827	1.89597	0.0579642	0.146707
ILL.cdoA-BSU31140.338~823	20.5291	0.254818	0.888108	0.286923	0.774172	0.868308
ILL.cdsA-BSU16540.1~810	3539.8	1.02306	0.590117	1.73366	0.0829786	0.191095
ILL.cgeA-BSU19780.15~416	3.2297	1.92486	2.227	0.864332	0.387406	0.564751
ILL.cgeB-BSU19790.7~960	20.2756	0.472675	0.892093	0.529849	0.596217	0.742448
ILL.cgeC-BSU19770.1~306	3.14223	3.63519	2.40429	1.51196	0.130544	0.268808
ILL.cgeD-BSU19760.1~1281	45.4857	-2.57647	0.891002	-2.89166	0.00383214	0.0160531
ILL.cgeE-BSU19750.4~783	70.5271	-2.30676	0.638783	-3.61118	0.000304809	0.00176866
ILL.cggR-BSU33950.100~1122	5435.79	-2.88652	0.609493	-4.73594	2.18042e-06	2.19793e-05
ILL.cheA-BSU16430.1~2019	2118.22	-4.94633	0.478128	-10.3452	4.39994e-25	5.88031e-23
ILL.cheB-BSU16420.2~1075	1067.3	-4.8672	0.492026	-9.89217	4.5016e-23	4.99338e-21
ILL.cheC-BSU16450.10~639	645.221	-4.28199	0.519653	-8.2401	1.72071e-16	7.92101e-15
ILL.cheD-BSU16460.1~501	543.831	-4.20033	0.506976	-8.28506	1.1805e-16	5.55772e-15
ILL.cheR-BSU22720.25~795	2024.76	2.97694	0.463956	6.41642	1.39519e-10	2.89013e-09
ILL.cheV-BSU14010.162~1073	941.62	-4.54121	0.521435	-8.70906	3.06393e-18	1.67024e-16
ILL.cheW-BSU16440.22~492	610.655	-4.02744	0.499452	-8.06371	7.40103e-16	3.06625e-14
ILL.cheY-BSU16330.26~388	747.114	-3.74287	0.482773	-7.75284	8.98571e-15	3.4154e-13
ILL.cimH-BSU38770.19~1371	283.063	3.02769	0.972927	3.11194	0.0018586	0.00862281
ILL.cinA-BSU16930.1~1251	5258.44	0.540549	0.45433	1.18977	0.234136	0.403505
ILL.citA-BSU09440.12~1112	552.677	0.712519	0.485353	1.46804	0.142093	0.283433
ILL.citB-BSU18000.43~2772	12874	-0.514934	0.630579	-0.816605	0.414154	0.590961
ILL.citH-BSU39060.1~1281	45.6349	0.758062	0.658957	1.1504	0.24998	0.422777
ILL.citM-BSU07610.40~1341	245.627	0.743095	0.611619	1.21496	0.22438	0.390755
ILL.citR-BSU09430.36~911	377.456	0.945164	0.552893	1.70949	0.0873604	0.198177
ILL.citS-BSU07580.4~1632	361.683	0.623493	0.505412	1.23363	0.217339	0.381057
ILL.citT-BSU07590.1~681	135.709	0.200315	0.573103	0.349526	0.726694	0.841446
ILL.citZ-BSU29140.186~1304	9489.58	-0.186016	0.579768	-0.320846	0.748327	0.853377
ILL.clpC-BSU00860.1~2433	14333.4	1.76292	0.626013	2.81611	0.00486097	0.0194957
ILL.clpE-BSU13700.33~2132	442.744	-1.40913	0.553384	-2.54638	0.0108845	0.0379904
ILL.clpP-BSU34540.42~635	5686.47	-1.78023	0.549832	-3.23777	0.00120466	0.00596998
ILL.clpQ-BSU16150.1~546	2343.83	-0.630101	0.576374	-1.09321	0.2743	0.450069
ILL.clpX-BSU28220.1~1263	21769.4	0.163758	0.460525	0.35559	0.722148	0.837586
ILL.clsA-BSU36590.243~1691	1475.4	-0.482117	0.479396	-1.00568	0.314572	0.490874
ILL.clsB-BSU37190.1~1197	9.30962	-0.0718013	1.14056	-0.0629529	0.949804	0.971614
ILL.cmk-BSU22890.1~675	2911.33	-1.41402	0.519989	-2.71933	0.00654144	0.0250242
ILL.coaA-BSU23760.1~960	555.032	-0.93301	0.499492	-1.86792	0.0617738	0.153989
ILL.coaBC-BSU15700.78~1298	2679.76	2.10731	0.457514	4.60599	4.10505e-06	3.87408e-05
ILL.coaD-BSU15020.5~490	1583.32	0.288685	0.492055	0.586693	0.55741	0.712103
ILL.coaE-BSU29060.16~609	684.159	-0.858657	0.480345	-1.78758	0.0738435	0.17653
ILL.coaX-BSU00700.195~971	3643.9	0.964951	0.827467	1.16615	0.243554	0.415415
ILL.codY-BSU16170.1~780	4111.25	-0.963403	0.543345	-1.7731	0.0762128	0.179467
ILL.coiA-BSU11530.57~1178	78.2668	2.4863	0.872992	2.84802	0.00439923	0.0180227
ILL.comA-BSU31680.3~647	3072.75	1.37423	0.459215	2.99256	0.00276647	0.0121801
ILL.comC-BSU28070.21~767	23.3026	0.620372	1.05513	0.587958	0.55656	0.711997
ILL.comEA-BSU25590.1~618	44.9551	4.18672	1.17766	3.55512	0.000377804	0.00215895
ILL.comEB-BSU25580.10~579	382.87	-0.19404	0.563682	-0.344237	0.730668	0.843925
ILL.comEC-BSU25570.4~2334	221.961	1.01056	0.619205	1.63203	0.102674	0.222748
ILL.comER-BSU25600.84~905	12.2807	0.52285	1.03601	0.504679	0.613785	0.757201
ILL.comFA-BSU35470.7~1398	284.603	2.17678	0.540704	4.02583	5.67748e-05	0.000396657
ILL.comFB-BSU35460.60~356	98.6522	0.0731005	0.6157	0.118727	0.905491	0.948773
ILL.comFC-BSU35450.1~690	336.396	0.203567	0.509773	0.39933	0.68965	0.813314
ILL.comGA-BSU24730.2~1072	12.66	0.451985	1.08393	0.416989	0.676686	0.804683
ILL.comGB-BSU24720.1~972	7.37248	0.245745	1.44931	0.16956	0.865356	0.924251
ILL.comGC-BSU24710.1~297	4.04452	0.254233	1.57386	0.161534	0.871673	0.928061
ILL.comGD-BSU24700.1~432	2.62938	0.912994	2.25238	0.405346	0.685223	0.810645
ILL.comGE-BSU24690.1~348	3.62979	0.402322	1.75193	0.229645	0.818368	0.894468
ILL.comGF-BSU24680.26~409	5.6076	0.269696	1.42827	0.188827	0.850229	0.91541
ILL.comGG-BSU24670.1~375	13.9491	-0.904077	1.01974	-0.886577	0.375307	0.553935
ILL.comK-BSU10420.20~598	131.287	-2.83046	0.580209	-4.87834	1.06981e-06	1.17254e-05
ILL.comN-BSU27660.1~297	996.198	-0.319269	0.467664	-0.682689	0.494803	0.660215
ILL.comP-BSU31690.1~2310	5431.82	0.115973	0.455366	0.254681	0.798969	0.88388
ILL.comQ-BSU31710.106~1005	1283.58	0.940135	0.521902	1.80136	0.0716458	0.172575
ILL.comS-BSU03500.1~141	0	NA	NA	NA	NA	NA
ILL.comX-BSU31700.1~168	268.438	0.777656	0.568544	1.3678	0.171374	0.322723
ILL.comZ-BSU11310.15~206	838.583	0.693286	0.485297	1.42858	0.153125	0.29756
ILL.copA-BSU33500.84~2492	1364.83	0.0820849	0.523183	0.156895	0.875328	0.929737
ILL.copB-BSU33490.70~2169	1082.79	-0.283699	0.612757	-0.462988	0.643373	0.782235
ILL.copZ-BSU33510.13~222	186.818	0.403412	0.723003	0.557968	0.576866	0.726965
ILL.cotA-BSU06300.152~1693	38.3514	1.76924	0.78793	2.24543	0.0247406	0.0743435
ILL.cotB-BSU36050.1~1143	46.3517	-0.394012	0.736767	-0.534786	0.592798	0.739971
ILL.cotC-BSU17700.175~375	172.11	2.52008	0.535958	4.702	2.5762e-06	2.5534e-05
ILL.cotD-BSU22200.11~238	1463.52	-0.777347	0.503333	-1.5444	0.122491	0.255659
ILL.cotE-BSU17030.26~571	47.8748	0.983578	0.851052	1.15572	0.247796	0.420789
ILL.cotF-BSU40530.26~508	7.48653	-0.44842	1.3831	-0.324213	0.745777	0.852951
ILL.cotG-BSU36070.141~728	2.5283	4.89149	2.57871	1.89688	0.0578442	0.146707
ILL.cotH-BSU36060.1~1089	12.5821	-0.149161	0.998408	-0.149398	0.881239	0.933514
ILL.cotI-BSU30920.1~1074	6.11239	-0.378514	1.307	-0.289605	0.772118	0.867848
ILL.cotJA-BSU06890.1~249	0.89573	-1.41847	3.28725	-0.431507	0.6661	NA
ILL.cotJB-BSU06900.1~264	1.24341	-0.31913	2.59515	-0.122971	0.90213	NA
ILL.cotJC-BSU06910.1~570	6.92626	-0.249404	1.46348	-0.170418	0.864681	0.923768
ILL.cotM-BSU17970.42~434	11.4708	1.19731	1.0243	1.16891	0.24244	0.414026
ILL.cotO-BSU11730.18~701	1227.59	5.08115	0.705972	7.19738	6.13793e-13	1.77828e-11
ILL.cotP-BSU05550.1~432	4.32681	1.89726	2.03101	0.934147	0.350228	0.529754
ILL.cotR-BSU34530.305~1267	39.2146	-0.52245	0.772143	-0.676623	0.498645	0.663997
ILL.cotS-BSU30900.1~1056	288.49	4.69099	1.10249	4.25489	2.09149e-05	0.0001652
ILL.cotSA-BSU30910.1~1134	305.147	5.09017	1.14658	4.43944	9.01915e-06	7.80091e-05
ILL.cotT-BSU12090.28~351	2.62657	1.00268	2.2009	0.455576	0.648695	0.784796
ILL.cotU-BSU17670.192~452	17.9621	0.0995136	0.875064	0.113721	0.909459	0.951006
ILL.cotV-BSU11780.1~387	5.8989	2.47349	1.52658	1.62028	0.105171	0.2266
ILL.cotW-BSU11770.1~318	5.78998	1.6389	1.44209	1.13648	0.255756	0.42916
ILL.cotX-BSU11760.99~617	14.3771	1.78481	1.01839	1.75258	0.0796738	0.185601
ILL.cotY-BSU11750.1~489	4.00932	2.87195	1.94523	1.47641	0.139834	0.279871
ILL.cotZ-BSU11740.1~447	5.1803	2.7164	1.58317	1.7158	0.0861984	0.196328
ILL.coxA-BSU27830.148~744	41.8847	1.94418	0.866573	2.24352	0.0248631	0.0744464
ILL.crcBA-BSU09600.1~357	238.06	-0.426389	0.500159	-0.852507	0.393933	0.571223
ILL.crh-BSU34740.24~281	3084.06	2.26689	0.698781	3.24406	0.00117839	0.0058538
ILL.csaA-BSU19040.1~333	88.805	-0.0480436	0.714095	-0.067279	0.94636	0.969048
ILL.csbA-BSU35180.68~298	260.024	-0.595781	0.561942	-1.06022	0.289045	0.464874
ILL.csbB-BSU08600.1~990	984.987	-1.48889	0.633836	-2.34902	0.0188231	0.059496
ILL.csbC-BSU39810.18~1403	175.885	3.48633	0.614083	5.6773	1.36837e-08	2.09194e-07
ILL.csbD-BSU36670.14~202	46.0793	5.59493	1.12499	4.97331	6.58179e-07	7.57455e-06
ILL.csbX-BSU27760.6~1313	714.993	0.934065	0.637583	1.46501	0.142918	0.284122
ILL.csfB-BSU00240.130~324	686.122	2.33316	0.806461	2.89308	0.0038148	0.0160129
ILL.csgA-BSU02070.112~360	9.49827	3.27016	1.43479	2.27919	0.0226557	0.0690547
ILL.cshA-BSU04580.1~1536	17446.4	-0.567999	0.474037	-1.19822	0.230833	0.39914
ILL.cshB-BSU25140.29~1345	4178.87	-0.18241	0.578065	-0.315553	0.752342	0.856305
ILL.csn-BSU26890.12~845	165.544	-0.985414	0.572852	-1.72019	0.0853978	0.194718
ILL.csoR-BSU33520.10~315	205.924	-0.296708	0.548136	-0.541303	0.588298	0.736351
ILL.cspB-BSU09100.69~272	42945.7	-1.65797	0.544964	-3.04234	0.00234743	0.0105826
ILL.cspC-BSU05120.89~289	8748.31	-1.04205	0.503924	-2.06787	0.0386526	0.10683
ILL.cspD-BSU21930.26~226	21124	0.435382	0.609169	0.714714	0.474786	0.64493
ILL.cspR-BSU08930.1~483	6602.28	2.20724	0.546825	4.03646	5.42627e-05	0.000381681
ILL.csrA-BSU35370.1~225	153.606	-0.505197	0.530389	-0.952503	0.340842	0.518776
ILL.cssR-BSU33010.11~688	318.275	0.633599	0.729446	0.868604	0.385064	0.563069
ILL.cssS-BSU33020.1~1356	698.36	0.043411	0.628033	0.0691221	0.944892	0.968283
ILL.cstA-BSU28710.9~1805	1903.93	0.399734	0.785622	0.508812	0.610884	0.754364
ILL.ctaA-BSU14870.355~1275	1590.37	0.0715262	0.574404	0.124522	0.900902	0.945639
ILL.ctaB-BSU14880.1~918	4601.56	-0.243999	0.50928	-0.479105	0.631864	0.771306
ILL.ctaC-BSU14890.224~1294	671.846	1.8428	0.704743	2.61486	0.00892646	0.0322146
ILL.ctaD-BSU14900.33~1901	1028.02	1.49002	0.695859	2.14126	0.0322527	0.0928582
ILL.ctaE-BSU14910.1~624	288.692	0.95928	0.719681	1.33292	0.182556	0.336297
ILL.ctaF-BSU14920.1~333	128.847	0.869142	0.762565	1.13976	0.254386	0.42778
ILL.ctaG-BSU14930.1~894	298.853	1.57477	0.738063	2.13365	0.0328717	0.0941821
ILL.ctaO-BSU12080.118~1107	42.9038	-1.08277	0.758069	-1.42832	0.153199	0.297563
ILL.ctc-BSU00520.18~632	7689.24	-0.441747	0.532144	-0.830127	0.406467	0.582898
ILL.ctpA-BSU19590.12~1412	4594.59	0.250002	0.477998	0.523019	0.600961	0.74604
ILL.ctpB-BSU35240.140~1582	1478.98	5.5656	0.81935	6.79271	1.10049e-11	2.63546e-10
ILL.ctrA-BSU09460.120~1517	20.924	0.256591	0.967058	0.265332	0.790754	0.879488
ILL.ctsR-BSU00830.134~598	1051.23	1.20269	0.799847	1.50365	0.132671	0.271314
ILL.cueR-BSU09560.8~439	1641.44	0.613175	0.620189	0.988691	0.322814	0.500344
ILL.cwlA-BSU25900.1~819	308.196	5.47476	0.707052	7.74308	9.70388e-15	3.62191e-13
ILL.cwlC-BSU17410.1~768	106.965	0.297787	0.576913	0.516173	0.605734	0.750414
ILL.cwlD-BSU01530.60~773	339.026	4.08823	0.798725	5.11844	3.0807e-07	3.73816e-06
ILL.cwlH-BSU25710.45~797	10.3612	2.23283	1.25119	1.78457	0.0743304	0.17678
ILL.cwlJ-BSU02600.314~742	66.7875	0.953669	0.767351	1.24281	0.213939	0.376601
ILL.cwlK-BSU02810.60~563	82.1818	-0.348084	0.570355	-0.610293	0.541668	0.699323
ILL.cwlO-BSU34800.178~1599	37209.8	0.432697	0.466481	0.927577	0.353627	0.533337
ILL.cwlS-BSU19410.274~1518	384.378	-1.74142	0.492313	-3.53722	0.000404364	0.00228551
ILL.cycB-BSU34160.25~1290	694.228	1.67314	0.811453	2.06191	0.0392165	0.1081
ILL.cydA-BSU38760.182~1588	19.9704	-0.0271097	0.866974	-0.0312693	0.975055	0.985717
ILL.cydB-BSU38750.1~1017	19.1538	-0.985846	0.851721	-1.15748	0.247078	0.420212
ILL.cydC-BSU38740.1~1704	42.6831	-0.648992	0.660635	-0.982376	0.325915	0.503267
ILL.cydD-BSU38730.1~1728	67.0663	-0.944678	0.636218	-1.48483	0.137588	0.27725
ILL.cyeA-BSU18770.1~879	78.0596	0.80189	0.618625	1.29624	0.194891	0.353588
ILL.cyeB-BSU34000.18~935	165.256	0.0834162	0.529781	0.157454	0.874887	0.929737
ILL.cymR-BSU27520.71~487	1533.37	0.743987	0.545437	1.36402	0.172562	0.323348
ILL.cypA-BSU26740.1~1233	135.415	1.40857	0.606111	2.32395	0.0201282	0.0627944
ILL.cypB-BSU27160.16~3180	688.528	-1.12194	0.502926	-2.23082	0.0256932	0.0764157
ILL.cypC-BSU02100.90~1343	87.0746	2.29708	0.661135	3.47445	0.000511911	0.00277779
ILL.cypX-BSU35060.1~1218	237.509	-0.697268	0.571371	-1.22034	0.222335	0.388405
ILL.cysC-BSU15600.1~594	221.483	-1.29728	0.775124	-1.67364	0.094201	0.210122
ILL.cysE-BSU00930.125~778	742.313	-0.19806	0.615835	-0.321612	0.747747	0.853377
ILL.cysH-BSU15570.162~863	964.758	0.703874	0.511026	1.37737	0.168397	0.318279
ILL.cysJ-BSU33440.32~1849	2299.89	2.31673	0.57783	4.00936	6.08837e-05	0.000422515
ILL.cysK-BSU00730.1~927	7867.45	0.486544	0.639969	0.760262	0.447098	0.621052
ILL.cysL-BSU37650.6~905	582.343	0.275398	0.505302	0.545016	0.585742	0.733594
ILL.cysP-BSU15580.5~1069	575.447	0.244141	0.494836	0.493377	0.621746	0.764006
ILL.cysS-BSU00940.1~1401	1649.97	-0.419152	0.542541	-0.772573	0.439775	0.615121
ILL.czcD-BSU26650.15~950	48.8993	-0.714585	0.682582	-1.04688	0.295153	0.469773
ILL.czrA-BSU19120.12~335	353.208	1.14886	0.486376	2.36209	0.0181724	0.0579586
ILL.dacA-BSU00100.61~1392	12170.6	0.0251194	0.495572	0.0506878	0.959574	0.975826
ILL.dacB-BSU23190.123~1271	265.072	2.14392	1.01217	2.11814	0.0341635	0.0969648
ILL.dacC-BSU18350.33~1508	163.494	0.760622	0.627224	1.21268	0.225252	0.391615
ILL.dacF-BSU23480.1~1170	46.2193	4.79131	1.11589	4.29372	1.75705e-05	0.000140802
ILL.dapA-BSU16770.1~873	8559.08	0.275713	0.504747	0.54624	0.584901	0.732762
ILL.dapB-BSU22490.12~815	1069.61	-0.327094	0.499375	-0.655006	0.512464	0.676096
ILL.dapF-BSU32170.20~874	2124.5	-0.292914	0.567694	-0.515972	0.605874	0.750414
ILL.dapG-BSU16760.92~1306	8102.88	0.429116	0.54052	0.793895	0.427257	0.603726
ILL.dapH-BSU14180.21~731	6311.39	-0.627994	0.57422	-1.09365	0.27411	0.449936
ILL.dapL-BSU14190.70~1194	2570.56	1.06179	0.466692	2.27515	0.0228971	0.0697008
ILL.dat-BSU09670.1~849	1017.57	0.663416	0.596593	1.11201	0.266134	0.441026
ILL.dck-BSU00140.1~654	834.938	-2.50285	0.752124	-3.32772	0.00087561	0.00447858
ILL.dctB-BSU04440.1~1053	325.706	-0.532219	0.568914	-0.9355	0.349531	0.529278
ILL.dctP-BSU04470.1~1266	9685.98	0.752649	1.15603	0.651061	0.515007	0.677357
ILL.dctR-BSU04460.1~681	205.673	-0.796428	0.504034	-1.58011	0.114083	0.242088
ILL.dctS-BSU04450.70~1677	413.761	-0.580401	0.486168	-1.19383	0.232546	0.401155
ILL.ddl-BSU04560.175~1239	4717.3	-1.55988	0.458997	-3.39846	0.000677666	0.00357197
ILL.deaD-BSU39110.1~1440	2349.71	-2.21071	0.48196	-4.58692	4.49833e-06	4.15995e-05
ILL.def-BSU14560.7~561	1291.75	-0.681291	0.470667	-1.4475	0.147757	0.289847
ILL.def-BSU15720.27~509	618.651	0.35971	0.471581	0.762775	0.445598	0.619917
ILL.degA-BSU10840.18~1031	488.169	-0.372073	0.494925	-0.751776	0.452186	0.624885
ILL.degQ-BSU31720.193~333	196.813	2.8899	0.58124	4.97196	6.62795e-07	7.58552e-06
ILL.degR-BSU21940.37~219	232.106	-1.6085	0.747135	-2.1529	0.0313268	0.0905701
ILL.degS-BSU35500.1~1158	1814.1	-0.747296	0.461451	-1.61945	0.105351	0.226855
ILL.degU-BSU35490.2~691	2186.29	-0.282467	0.459647	-0.61453	0.538865	0.696743
ILL.deoC-BSU39420.1~672	3130.8	0.401751	0.563131	0.713424	0.475583	0.645627
ILL.deoD-BSU19630.1~702	3105.83	-0.174928	0.466355	-0.375097	0.707588	0.827651
ILL.deoR-BSU39430.35~976	945.295	-0.352928	0.540059	-0.653499	0.513435	0.676362
ILL.des-BSU19180.162~1220	564.336	-0.545878	0.786508	-0.694053	0.487649	0.65417
ILL.desK-BSU19190.5~1117	186.694	0.376659	0.560392	0.672134	0.501498	0.665932
ILL.desR-BSU19200.1~600	146.384	-0.232374	0.557623	-0.416722	0.676882	0.804683
ILL.dfrA-BSU21810.1~507	1407.53	0.953916	0.474978	2.00834	0.0446074	0.119928
ILL.dgcK-BSU09120.1~1080	1611.05	-1.03049	0.658908	-1.56393	0.117834	0.247936
ILL.dgcP-BSU29650.71~1810	2330.93	0.397311	0.458014	0.867466	0.385687	0.563236
ILL.dgcW-BSU13420.334~2583	512.046	-4.88754	0.529512	-9.23026	2.6997e-20	1.83359e-18
ILL.dgk-BSU00150.1~624	786.532	-2.25798	0.683798	-3.30212	0.000959579	0.00486602
ILL.dgkA-BSU25310.1~372	658.632	0.3429	0.485652	0.70606	0.480151	0.648318
ILL.dgrA-BSU22910.1~654	493.63	-0.47318	0.640472	-0.738798	0.46003	0.63214
ILL.dhaS-BSU19310.106~1593	6731.53	2.01104	0.801102	2.51034	0.0120614	0.0411836
ILL.dhbA-BSU32000.122~907	528.449	-3.69903	0.504095	-7.33796	2.16873e-13	6.55843e-12
ILL.dhbB-BSU31970.1~939	464.349	-4.11645	0.544548	-7.55938	4.04996e-14	1.36415e-12
ILL.dhbC-BSU31990.26~1222	717.628	-3.51873	0.505506	-6.96081	3.38321e-12	8.70599e-11
ILL.dhbE-BSU31980.1~1620	770.188	-3.75335	0.48886	-7.67776	1.619e-14	5.68434e-13
ILL.dhbF-BSU31960.1~7137	2316.81	-4.69564	0.570925	-8.22461	1.9583e-16	8.72391e-15
ILL.dinB-BSU05630.14~532	1022.19	1.929	0.617242	3.12518	0.00177694	0.00828104
ILL.dinF-BSU21710.72~1409	1696	2.58246	0.527321	4.89732	9.71549e-07	1.07624e-05
ILL.dinG-BSU22400.1~2796	6301.28	-0.342417	0.492691	-0.694994	0.487059	0.654018
ILL.divIB-BSU15240.88~879	1123.56	0.15836	0.506435	0.312695	0.754512	0.857833
ILL.divIC-BSU00620.18~395	1333.58	-1.69845	0.70586	-2.40621	0.016119	0.0524185
ILL.divIVA-BSU15420.1~495	4285.57	0.184457	0.612731	0.30104	0.763384	0.863608
ILL.dltA-BSU38500.1~1512	10459.6	-3.95699	0.792464	-4.99327	5.93649e-07	6.88933e-06
ILL.dltB-BSU38510.1~1188	7438.89	-3.88376	0.892034	-4.35383	1.33782e-05	0.000110191
ILL.dltC-BSU38520.17~253	1157.06	-4.05014	0.966808	-4.18919	2.79953e-05	0.000211265
ILL.dltD-BSU38530.1~1179	8452.81	-4.24074	0.862817	-4.91499	8.8786e-07	9.94164e-06
ILL.dltE-BSU38540.1~759	6196.83	-3.99461	0.665974	-5.99814	1.99594e-09	3.59529e-08
ILL.dnaA-BSU00010.281~1621	10570.3	-0.410741	0.458233	-0.896359	0.370061	0.550309
ILL.dnaB-BSU28990.115~1533	4538.96	2.48738	0.466023	5.33747	9.42502e-08	1.25556e-06
ILL.dnaC-BSU40440.25~1389	2944.67	-0.797609	0.518603	-1.53799	0.12405	0.258131
ILL.dnaD-BSU22350.77~775	4245.26	1.6484	0.481005	3.42699	0.000610321	0.00326266
ILL.dnaE-BSU29230.1~3348	4378.57	-0.154459	0.512186	-0.301567	0.762982	0.863608
ILL.dnaG-BSU25210.1~1812	13518.7	0.267722	0.767406	0.348865	0.72719	0.841785
ILL.dnaI-BSU28980.1~936	2880.69	2.12467	0.489584	4.33974	1.42654e-05	0.000116571
ILL.dnaJ-BSU25460.200~1327	4469.31	-0.608038	0.701736	-0.866477	0.386228	0.563828
ILL.dnaK-BSU25470.24~1859	16803.1	-0.674287	0.493725	-1.36571	0.172029	0.323027
ILL.dnaN-BSU00020.179~1315	7923.38	0.0733678	0.472699	0.15521	0.876656	0.930086
ILL.dnaX-BSU00190.36~1727	12374	1.93627	0.529474	3.65698	0.000255209	0.00151698
ILL.dppA-BSU12920.12~836	87.4394	0.793942	0.702795	1.12969	0.258606	0.432019
ILL.dppB-BSU12930.1~927	31.3566	1.07516	0.769692	1.39687	0.162453	0.309871
ILL.dppC-BSU12940.1~963	28.3114	1.88296	0.772782	2.43659	0.0148263	0.0488278
ILL.dppD-BSU12950.1~1008	22.4867	1.20452	0.831233	1.44908	0.147316	0.289255
ILL.dppE-BSU12960.3~1652	64.2331	0.752786	0.604084	1.24616	0.212705	0.375634
ILL.dprA-BSU16110.61~954	1070.95	1.02236	0.469322	2.17838	0.0293778	0.0859015
ILL.dps-BSU30650.1~438	2186.36	0.583545	0.867054	0.673021	0.500934	0.66561
ILL.drm-BSU23500.1~1185	9124.35	-0.60982	0.473306	-1.28843	0.197598	0.356786
ILL.dsdA-BSU23770.76~1422	552.823	-0.79024	0.479991	-1.64637	0.0996883	0.21903
ILL.dtpT-BSU03670.1~1479	3784.86	1.1614	0.575902	2.01667	0.04373	0.118028
ILL.dusB-BSU00810.24~1025	4806.12	-0.415492	0.54942	-0.756237	0.449507	0.622429
ILL.dusC-BSU08030.41~1018	1656.77	0.0412804	0.575228	0.0717636	0.94279	0.967514
ILL.dxr-BSU16550.1~1152	6180.89	0.631669	0.592434	1.06623	0.286321	0.462195
ILL.dxs-BSU24270.1~1902	5732.4	0.0305874	0.465207	0.0657502	0.947577	0.969815
ILL.eag-BSU13650.81~512	216.197	1.60478	0.541921	2.96127	0.00306369	0.0132632
ILL.ebrA-BSU17300.7~324	99.0701	0.133139	0.719139	0.185136	0.853122	0.917095
ILL.ebrB-BSU17290.5~358	124.634	0.276953	0.632919	0.437581	0.66169	0.795072
ILL.ecsA-BSU10040.378~1121	681.745	-0.778467	0.566912	-1.37317	0.169699	0.320302
ILL.ecsB-BSU10050.1~1227	1105.92	-0.748379	0.52841	-1.41628	0.156692	0.302505
ILL.ecsC-BSU10060.18~728	876.425	-0.952276	0.497186	-1.91533	0.0554501	0.142261
ILL.efeM-BSU38270.1~1158	3012.29	-1.55519	0.474628	-3.27665	0.00105045	0.00527517
ILL.efeN-BSU38260.19~1269	3920.21	-1.64784	0.473809	-3.47787	0.000505424	0.00275522
ILL.efeU-BSU38280.25~1470	1900.14	-0.865068	0.529398	-1.63406	0.102246	0.22245
ILL.efp-BSU24450.25~582	8067.8	-0.469603	0.456866	-1.02788	0.304007	0.479627
ILL.eglS-BSU18130.34~1533	391.713	1.91109	0.494797	3.86237	0.000112292	0.000724648
ILL.endB-BSU04650.18~299	5605.5	-0.648368	0.461676	-1.40438	0.160206	0.307503
ILL.engA-BSU22840.27~1337	6515.01	-0.332688	0.583308	-0.570347	0.568442	0.721083
ILL.engB-BSU28190.1~588	2151.25	-0.0662989	0.466097	-0.142243	0.886888	0.936863
ILL.eno-BSU33900.30~1322	20501.8	-2.58273	0.53415	-4.83522	1.33002e-06	1.42017e-05
ILL.epr-BSU38400.9~1946	1601.13	-7.0876	0.614041	-11.5426	8.04991e-31	2.3822e-28
ILL.epsA-BSU34370.38~742	52.1883	-3.16961	0.745175	-4.25351	2.10446e-05	0.000165756
ILL.epsB-BSU34360.6~689	54.768	-5.03639	0.877735	-5.73794	9.58342e-09	1.50394e-07
ILL.epsC-BSU34350.1~1797	155.259	-2.68187	0.547286	-4.90031	9.56853e-07	1.06566e-05
ILL.epsD-BSU34340.1~1146	96.6347	-2.68991	0.611132	-4.40151	1.07499e-05	9.07063e-05
ILL.epsE-BSU34330.1~837	54.5559	-3.40127	0.754381	-4.50869	6.5228e-06	5.79913e-05
ILL.epsF-BSU34320.1~1155	57.1895	-1.92761	0.874374	-2.20456	0.0274848	0.0809884
ILL.epsG-BSU34310.1~1104	33.0769	-2.38344	0.952421	-2.50251	0.0123317	0.0419036
ILL.epsH-BSU34300.25~1059	38.3929	-2.43371	0.855809	-2.84375	0.00445858	0.0181631
ILL.epsI-BSU34290.5~1081	41.5829	-3.13077	0.775027	-4.03956	5.35523e-05	0.000377325
ILL.epsJ-BSU34280.1~1035	67.6957	-1.10473	0.93341	-1.18355	0.236593	0.406893
ILL.epsK-BSU34265.1~1518	74.5273	-1.59601	0.80088	-1.99282	0.0462815	0.123308
ILL.epsL-BSU34250.1~609	33.5922	-1.92351	1.02393	-1.87855	0.0603066	0.151058
ILL.epsM-BSU34240.1~651	33.5989	-2.40345	0.778169	-3.08859	0.00201105	0.00924728
ILL.epsN-BSU34230.5~1171	71.8971	-2.4783	0.737997	-3.35814	0.000784691	0.00405358
ILL.epsO-BSU34220.1~969	62.2397	-1.89812	0.656737	-2.89023	0.00384957	0.0161099
ILL.era-BSU25290.1~906	5748.14	0.590562	0.46043	1.28263	0.199621	0.359578
ILL.estA-BSU02700.18~656	324.885	-3.01322	0.631908	-4.76844	1.85657e-06	1.8992e-05
ILL.estB-BSU08350.6~638	469.788	-2.01239	0.566152	-3.55451	0.000378686	0.00216101
ILL.etfA-BSU28520.12~989	4286.14	2.79121	1.0423	2.67792	0.00740805	0.0275755
ILL.etfB-BSU28530.15~788	3127.14	2.72678	0.994219	2.74264	0.00609474	0.0235546
ILL.eutD-BSU37660.43~1014	14688.3	-1.69207	0.541606	-3.12417	0.00178305	0.00829089
ILL.exlX-BSU18630.1~699	331.475	0.056351	0.490346	0.114921	0.908508	0.950661
ILL.exoA-BSU22010.13~903	1762.07	1.23852	0.532191	2.32722	0.0199537	0.0623912
ILL.exoAA-BSU40880.9~767	1646.57	2.55561	0.755491	3.38271	0.000717744	0.00376452
ILL.exuM-BSU12310.68~1447	80.7307	3.77156	0.771118	4.89104	1.00306e-06	1.10524e-05
ILL.exuR-BSU12370.25~1026	485.021	-0.606901	0.561837	-1.08021	0.280049	0.457329
ILL.exuT-BSU12360.1~1269	28.4682	0.814276	0.767336	1.06117	0.288611	0.464536
ILL.ezrA-BSU29610.1~1689	7224.76	-0.824661	0.553786	-1.48913	0.136452	0.276036
ILL.fabD-BSU15900.1~954	4126.31	-1.32242	0.517441	-2.5557	0.0105975	0.037208
ILL.fabF-BSU11340.23~1264	6532	-1.40132	0.585666	-2.39269	0.0167252	0.0540583
ILL.fabG-BSU15910.1~741	4202.77	-1.39035	0.486098	-2.86021	0.00423355	0.0174004
ILL.fabG-BSU16870.55~783	1109.19	2.2052	0.586386	3.76067	0.00016946	0.00105417
ILL.fabG-BSU18500.21~737	3813.71	-0.263174	0.587083	-0.448274	0.653956	0.788286
ILL.fabG-BSU29420.41~808	1345.05	0.193278	0.483441	0.399798	0.689306	0.813314
ILL.fabHA-BSU11330.1~939	3753.04	-1.30811	0.634741	-2.06086	0.0393166	0.108304
ILL.fabHB-BSU10170.2~979	392.145	-3.02166	0.687076	-4.39786	1.09326e-05	9.15025e-05
ILL.fabI-BSU11720.136~912	8772.36	-0.726728	0.505731	-1.43698	0.150722	0.294548
ILL.fabL-BSU08650.1~753	2212.12	-1.10479	0.47284	-2.3365	0.0194651	0.0612794
ILL.fabZ-BSU36370.51~476	1835.09	-0.55262	0.49706	-1.11178	0.266234	0.441026
ILL.fadE-BSU32820.15~1799	2612.89	4.06081	1.17071	3.46867	0.000523049	0.00283267
ILL.fadF-BSU37180.37~2154	3178.68	5.17353	1.057	4.89453	9.85395e-07	1.08866e-05
ILL.fadG-BSU14071.1~1731	1449.86	1.64728	0.708016	2.32661	0.0199862	0.0624456
ILL.fadM-BSU32850.1~909	4.60438	0.573847	1.47982	0.387781	0.698178	0.820582
ILL.fadN-BSU32840.1~2448	5139.58	4.98241	1.20985	4.11822	3.81816e-05	0.000278988
ILL.fadR-BSU28550.6~590	1662.07	2.84323	0.990787	2.86966	0.00410909	0.016973
ILL.fbaA-BSU37120.73~930	46037.8	-1.02023	0.455838	-2.23813	0.0252123	0.0751472
ILL.fbp-BSU40190.1~2016	1429.35	-1.53733	0.5166	-2.97587	0.00292161	0.0127279
ILL.fdhD-BSU36710.19~807	1229.28	1.1075	0.670556	1.65162	0.0986119	0.217545
ILL.fer-BSU23040.72~320	3800.46	-0.141737	0.606318	-0.233767	0.815165	0.892739
ILL.feuA-BSU01630.1~954	737.41	-2.86365	0.598007	-4.78866	1.67897e-06	1.74774e-05
ILL.feuB-BSU01620.1~1005	339.351	-2.33873	0.504975	-4.63137	3.63257e-06	3.46768e-05
ILL.feuC-BSU01610.1~1011	335.989	-2.46947	0.501331	-4.92583	8.40044e-07	9.43172e-06
ILL.ffh-BSU15980.14~1354	14077.8	-1.48167	0.482001	-3.07401	0.00211205	0.00963683
ILL.fhuB-BSU33310.1~1155	1231.5	-0.371639	0.586797	-0.633334	0.526516	0.687728
ILL.fhuC-BSU33290.16~825	1553.61	-1.48754	0.493448	-3.01457	0.00257341	0.0114518
ILL.fhuD-BSU33320.37~984	4465.28	-0.694485	0.497974	-1.39462	0.16313	0.310592
ILL.fhuG-BSU33300.1~1011	1198.53	-0.706724	0.544087	-1.29892	0.193972	0.352392
ILL.flgB-BSU16180.49~438	836.171	-0.674715	0.506057	-1.33328	0.18244	0.336233
ILL.flgC-BSU16190.1~453	890.501	-0.83185	0.537371	-1.548	0.121622	0.254229
ILL.flgD-BSU16280.1~423	607.2	-2.65017	0.485271	-5.46122	4.72886e-08	6.57438e-07
ILL.flgG-BSU16290.22~816	1451.63	-2.82796	0.488284	-5.79163	6.97081e-09	1.13701e-07
ILL.flgK-BSU35410.13~1536	2903.33	-3.23491	0.468526	-6.90445	5.04001e-12	1.25034e-10
ILL.flgL-BSU35400.11~907	1870.39	-3.72556	0.483274	-7.70901	1.26802e-14	4.52881e-13
ILL.flgM-BSU35430.81~347	568.092	-2.92509	0.481264	-6.07794	1.21736e-09	2.27186e-08
ILL.flhA-BSU16390.1~2034	5179.81	-0.971062	0.618485	-1.57007	0.1164	0.246169
ILL.flhB-BSU16380.1~1083	1110.01	-4.5564	0.48318	-9.43003	4.09989e-21	3.20488e-19
ILL.flhF-BSU16400.1~1101	830.17	-4.94916	0.495535	-9.9875	1.72889e-23	2.04651e-21
ILL.flhO-BSU36400.66~878	2094.74	-1.49413	0.690514	-2.16379	0.0304805	0.0887427
ILL.flhP-BSU36390.34~843	1835.7	-1.88706	0.635392	-2.96991	0.00297886	0.012923
ILL.fliD-BSU35340.18~1514	3782.95	-4.01262	0.512516	-7.82926	4.90752e-15	1.90017e-13
ILL.fliE-BSU16200.1~321	662.391	-1.26868	0.475227	-2.66963	0.00759356	0.0280144
ILL.fliF-BSU16210.8~1618	3165.6	-1.55671	0.48214	-3.22875	0.00124334	0.00608883
ILL.fliG-BSU16220.13~1029	1889.08	-2.06972	0.466556	-4.43617	9.15723e-06	7.8874e-05
ILL.fliH-BSU16230.1~627	874.8	-2.1273	0.479333	-4.43804	9.07818e-06	7.8356e-05
ILL.fliI-BSU16240.1~1317	2355.09	-2.2024	0.47905	-4.59743	4.27737e-06	4.00025e-05
ILL.fliJ-BSU16250.3~446	537.653	-2.51621	0.48766	-5.15977	2.47255e-07	3.03955e-06
ILL.fliK-BSU16270.1~1464	2357.86	-2.72953	0.485929	-5.61713	1.9416e-08	2.89354e-07
ILL.fliL-BSU16300.1~423	351.67	-3.82587	0.521793	-7.33216	2.26474e-13	6.79914e-12
ILL.fliM-BSU16310.34~1032	1583.19	-3.64344	0.479562	-7.59742	3.02093e-14	1.03436e-12
ILL.fliP-BSU16350.1~666	691.695	-4.44692	0.502472	-8.8501	8.74439e-19	5.08524e-17
ILL.fliQ-BSU16360.1~270	195.907	-5.10765	0.647974	-7.88249	3.20915e-15	1.25429e-13
ILL.fliR-BSU16370.1~780	653.317	-4.32743	0.495406	-8.73511	2.43414e-18	1.36279e-16
ILL.fliS-BSU35330.1~402	761.711	-4.01395	0.564736	-7.10767	1.18018e-12	3.21676e-11
ILL.fliT-BSU35320.1~342	854.799	-3.94896	0.528457	-7.47262	7.86145e-14	2.48626e-12
ILL.fliY-BSU16320.1~1137	2012.35	-3.55064	0.46483	-7.63857	2.19645e-14	7.58323e-13
ILL.fliZ-BSU16340.13~672	791.887	-4.19659	0.496758	-8.44797	2.96405e-17	1.49757e-15
ILL.fmnP-BSU23050.106~678	1846.61	1.95093	0.596361	3.27139	0.0010702	0.00536784
ILL.fmt-BSU15730.5~958	1806.22	0.444598	0.463402	0.95942	0.337347	0.51573
ILL.fni-BSU22870.1~1050	6922.81	1.62155	0.501676	3.23227	0.00122809	0.00605147
ILL.fnr-BSU37310.5~721	149.226	-0.878951	0.523306	-1.67961	0.0930331	0.208231
ILL.folB-BSU00780.1~363	530.052	-0.203063	0.603121	-0.336686	0.736353	0.847456
ILL.folC-BSU28080.60~1352	1321.28	-1.51297	0.70234	-2.15418	0.0312259	0.0903606
ILL.folD-BSU24310.12~863	6074.79	-0.449466	0.516604	-0.870038	0.38428	0.56237
ILL.folE-BSU22780.188~760	18125.3	2.86567	0.541115	5.29587	1.1845e-07	1.54808e-06
ILL.folK-BSU00790.1~504	1275.11	-0.187489	0.556933	-0.336645	0.736385	0.847456
ILL.frlB-BSU32610.3~989	255.973	0.858255	0.612666	1.40085	0.161258	0.30873
ILL.frlD-BSU32570.1~855	64.5251	0.0340486	0.671478	0.050707	0.959559	0.975826
ILL.frlM-BSU32580.1~903	10.6574	1.43289	1.25713	1.13981	0.254367	0.42778
ILL.frlN-BSU32590.58~936	32.5719	1.15057	0.855971	1.34416	0.178895	0.331617
ILL.frlO-BSU32600.72~1340	88.9165	1.38838	0.772105	1.79817	0.0721493	0.173586
ILL.frlR-BSU32560.1~789	490.369	0.886718	0.524412	1.69088	0.0908596	0.20436
ILL.frr-BSU16520.1~558	9141.22	-0.476562	0.578259	-0.824133	0.409864	0.586754
ILL.fruA-BSU14400.1~1908	2446.84	0.528801	0.519796	1.01732	0.309	0.484491
ILL.fruK-BSU14390.1~912	1068.29	0.558233	0.497411	1.12228	0.261744	0.436168
ILL.fruR-BSU14380.8~763	863.794	0.899597	0.52047	1.72843	0.083911	0.192281
ILL.ftsA-BSU15280.2~1324	9101.23	0.0389863	0.456465	0.0854092	0.931936	0.961888
ILL.ftsE-BSU35260.114~800	6413.1	1.2696	0.530864	2.39157	0.0167764	0.0541736
ILL.ftsH-BSU00690.1~1914	42389	-0.440886	0.453661	-0.971841	0.33113	0.50901
ILL.ftsL-BSU15150.1~354	1624.9	0.382486	0.521123	0.733965	0.46297	0.634072
ILL.ftsR-BSU18420.35~892	341.973	0.316065	0.490413	0.644489	0.519259	0.681131
ILL.ftsW-BSU14850.206~1417	6575.51	2.4427	0.466495	5.23627	1.63853e-07	2.09519e-06
ILL.ftsX-BSU35250.1~891	9326.35	1.40245	0.496439	2.82501	0.00472787	0.0189986
ILL.ftsY-BSU15950.1~990	4106.72	0.0628649	0.477486	0.131658	0.895255	0.943526
ILL.ftsZ-BSU15290.1~1149	11339.8	-0.0697917	0.476966	-0.146324	0.883665	0.935219
ILL.fumC-BSU33040.1~1389	7848.93	-1.37849	0.478859	-2.8787	0.00399317	0.0165869
ILL.fur-BSU23520.10~459	2461.86	-0.108604	0.471558	-0.230309	0.817851	0.894468
ILL.fusA-BSU01120.54~2132	206378	-2.65925	0.611332	-4.34994	1.36177e-05	0.000111941
ILL.fxsA-BSU29170.87~470	3017.63	0.253244	0.461572	0.548654	0.583243	0.731348
ILL.gabD-BSU03910.1~1389	1213.97	-0.136167	0.651484	-0.20901	0.83444	0.904511
ILL.gabP-BSU06310.9~1418	365.945	1.0019	0.621304	1.61257	0.106838	0.229223
ILL.gabR-BSU03890.1~1440	167.056	1.27742	0.70797	1.80434	0.0711783	0.171731
ILL.gabT-BSU03900.107~1417	56.3726	0.602374	0.789384	0.763094	0.445408	0.61986
ILL.galE-BSU38860.1~1020	5109.86	-0.861215	0.52447	-1.64207	0.100576	0.219817
ILL.galK-BSU38200.81~1253	586.178	-1.06506	0.513386	-2.07458	0.0380252	0.10573
ILL.galT-BSU38190.1~1542	1169.9	-0.992024	0.573417	-1.73002	0.0836264	0.191959
ILL.ganA-BSU34130.19~2082	404.144	-0.102652	0.636295	-0.161328	0.871835	0.928061
ILL.ganB-BSU34120.1~1290	131.606	0.530597	0.681913	0.7781	0.43651	0.612
ILL.ganP-BSU34150.1~1257	304.855	0.654796	0.731663	0.894943	0.370818	0.550842
ILL.ganQ-BSU34140.1~852	165.818	0.778284	0.656093	1.18624	0.235527	0.405396
ILL.ganR-BSU34170.44~1036	232.343	-0.136852	0.521996	-0.262171	0.793189	0.880558
ILL.gapA-BSU33940.13~1020	32628	-2.12606	0.575849	-3.69204	0.000222459	0.00134253
ILL.gapB-BSU29020.36~1058	20632.4	6.60107	1.40491	4.69858	2.61977e-06	2.58422e-05
ILL.garD-BSU02510.91~1623	500.688	1.44529	0.475322	3.04065	0.0023607	0.0106193
ILL.gatA-BSU06680.1~1458	12510.9	-1.15479	0.46147	-2.50242	0.0123349	0.0419036
ILL.gatB-BSU06690.1~1431	12853.4	-1.21809	0.453299	-2.68717	0.00720598	0.0269931
ILL.gatC-BSU06670.103~393	2948.17	-1.11773	0.487176	-2.2943	0.0217733	0.0666717
ILL.gbsA-BSU31060.16~1488	70.3384	-0.61849	0.715065	-0.864943	0.38707	0.56446
ILL.gbsB-BSU31050.1~1209	116.742	-0.436928	0.595409	-0.733828	0.463054	0.634072
ILL.gcp-BSU05940.1~1041	9723.57	3.89956	0.673206	5.79252	6.93375e-09	1.13544e-07
ILL.gcvPA-BSU24560.30~1376	652.836	-0.444588	0.559647	-0.794409	0.426957	0.603715
ILL.gcvPB-BSU24550.1~1467	794.379	-0.542437	0.566854	-0.956926	0.338605	0.516472
ILL.gcvT-BSU24570.74~1162	658.212	0.0069732	0.572816	0.0121736	0.990287	0.994367
ILL.gdh-BSU03930.1~786	29.215	2.71217	1.06024	2.55807	0.0105254	0.0370175
ILL.gerAA-BSU33050.1~1449	18.5107	1.49012	1.02272	1.45701	0.145114	0.286288
ILL.gerAB-BSU33060.1~1098	7.90692	0.282362	1.36599	0.206709	0.836237	0.905286
ILL.gerAC-BSU33070.1~1122	19.874	0.790859	0.978778	0.808006	0.419087	0.59584
ILL.gerBA-BSU35800.1~1452	12.6423	-0.412735	0.981151	-0.420665	0.674	0.802691
ILL.gerBB-BSU35810.6~1112	29.5604	0.176756	0.783317	0.225651	0.821473	0.896802
ILL.gerBC-BSU35820.1~1125	90.4158	0.0286657	0.589379	0.0486371	0.961209	0.977248
ILL.gerD-BSU01550.1~558	9.89628	-0.118331	1.109	-0.106701	0.915026	0.954247
ILL.gerE-BSU28410.7~231	660.214	2.34885	0.602419	3.89902	9.65818e-05	0.000639113
ILL.gerKA-BSU03700.1~1635	73.1451	0.790801	0.753647	1.0493	0.294041	0.468913
ILL.gerKB-BSU03720.25~1146	80.5695	0.0679604	0.669447	0.101517	0.91914	0.95567
ILL.gerKC-BSU03710.1~1224	56.1787	0.309226	0.938688	0.329423	0.741836	0.850658
ILL.gerM-BSU28380.1~1101	439.982	3.57388	0.707447	5.05181	4.37648e-07	5.19535e-06
ILL.gerPA-BSU10720.1~222	3.72908	0.850753	1.73808	0.489478	0.624503	0.766159
ILL.gerPB-BSU10710.1~243	2.89615	0.011304	1.84582	0.00612412	0.995114	0.99694
ILL.gerPC-BSU10700.23~640	16.0067	0.891075	0.90612	0.983396	0.325413	0.502866
ILL.gerPD-BSU10690.1~177	2.7821	2.3217	1.98169	1.17157	0.241368	0.412877
ILL.gerPE-BSU10680.1~402	6.77536	1.12691	1.30244	0.865233	0.386911	0.564426
ILL.gerPF-BSU10670.23~250	7.57359	-0.310259	1.40653	-0.220584	0.825416	0.899447
ILL.gerT-BSU19490.1~474	10.8082	2.54496	1.23006	2.06898	0.038548	0.106612
ILL.ggaA-BSU35690.1106~2446	2254.54	0.0378903	0.58193	0.0651113	0.948085	0.970096
ILL.ggaB-BSU35680.1~2703	2553.39	-1.18036	0.622424	-1.89639	0.0579087	0.146707
ILL.ggt-BSU18410.21~1784	44.775	2.32193	0.992628	2.33918	0.0193264	0.0609354
ILL.gid-BSU16130.76~1383	2618.98	-0.00768322	0.575956	-0.0133399	0.989357	0.993674
ILL.gidA-BSU41010.1~1887	6229.41	-0.589668	0.612941	-0.962032	0.336033	0.514481
ILL.gidB-BSU41000.14~733	2587.6	-1.47757	0.615494	-2.40063	0.0163669	0.0531412
ILL.glcD-BSU28680.1~1413	2231.37	0.0946297	0.748324	0.126456	0.899371	0.945539
ILL.glcF-BSU28690.1~1335	1658.37	0.0393563	0.755354	0.0521032	0.958446	0.975398
ILL.glcK-BSU24850.11~976	1093.36	0.658518	0.564006	1.16757	0.242979	0.414606
ILL.glcP-BSU10520.29~1234	95.5837	-0.000416112	0.602887	-0.000690199	0.999449	0.999917
ILL.glcR-BSU36300.21~797	223.199	-1.24042	0.716014	-1.73239	0.0832039	0.191401
ILL.glcT-BSU13880.8~874	1583.7	-0.388012	0.466824	-0.831173	0.405876	0.582516
ILL.glcU-BSU03920.1~864	15.7952	3.6783	1.17394	3.13329	0.00172859	0.00809217
ILL.glgA-BSU30950.1~1455	9089.27	7.80965	0.882555	8.84891	8.8375e-19	5.08524e-17
ILL.glgB-BSU30980.17~1900	11312	8.86526	0.74369	11.9206	9.23997e-33	4.25347e-30
ILL.glgC-BSU30970.1~1143	7085.46	8.17783	0.79048	10.3454	4.39119e-25	5.88031e-23
ILL.glgD-BSU30960.24~1055	6984.8	8.36097	0.805049	10.3857	2.88133e-25	4.11632e-23
ILL.glgP-BSU30940.1~2397	10979.9	7.3742	0.871429	8.4622	2.62381e-17	1.34203e-15
ILL.glmM-BSU01770.1~1347	14635.3	2.10955	0.881683	2.39264	0.0167277	0.0540583
ILL.glmS-BSU01780.90~1892	48968	1.25824	0.865536	1.45371	0.146027	0.287543
ILL.glmU-BSU00500.43~1413	12763.1	-1.30702	0.662818	-1.97191	0.0486194	0.128463
ILL.glnA-BSU17460.1~1335	23074.3	-1.0257	0.461431	-2.22287	0.0262247	0.077773
ILL.glnH-BSU27440.1~822	2.98786	0.280645	1.84193	0.152364	0.8789	0.931559
ILL.glnJ-BSU02440.116~1348	274.928	0.0294546	0.535465	0.0550076	0.956132	0.974689
ILL.glnK-BSU36520.1~351	232.243	1.1698	0.908013	1.2883	0.19764	0.356786
ILL.glnL-BSU02450.11~955	255.489	-1.22467	0.524686	-2.33409	0.0195908	0.0615819
ILL.glnM-BSU27450.1~651	1.31469	0.923454	2.88336	0.320271	0.748763	NA
ILL.glnP-BSU27460.1~657	2.38214	-0.476286	1.96348	-0.242572	0.808337	0.889493
ILL.glnQ-BSU27430.1~729	0.772042	3.17786	3.9517	0.804176	0.421295	NA
ILL.glnR-BSU17450.1~408	2072.22	-1.10665	0.462441	-2.39307	0.0167081	0.0540583
ILL.glnT-BSU02420.1~1437	26.0008	-0.0190772	0.77318	-0.0246737	0.980315	0.988427
ILL.glpD-BSU09300.38~1705	3515.31	3.04846	0.528674	5.76623	8.1062e-09	1.29169e-07
ILL.glpF-BSU09280.126~950	11354.7	3.49171	0.607725	5.74555	9.16234e-09	1.44333e-07
ILL.glpG-BSU24870.1~1524	2020.18	2.40464	0.621335	3.87011	0.000108784	0.000706417
ILL.glpK-BSU09290.1~1491	23010.5	2.85331	0.593512	4.80751	1.52825e-06	1.60699e-05
ILL.glpP-BSU09270.1~579	1080.13	-0.102167	0.705324	-0.144851	0.884829	0.935642
ILL.glpQ-BSU02130.99~980	6682.03	1.36165	0.698275	1.95002	0.0511733	0.133761
ILL.glpT-BSU02140.1~1335	7308.45	1.6179	0.688779	2.34894	0.0188267	0.059496
ILL.glpX-BSU37090.31~996	6162.47	-0.0584943	0.485484	-0.120487	0.904098	0.948033
ILL.gltA-BSU18450.47~4609	4913.9	2.58954	0.491141	5.2725	1.34578e-07	1.75332e-06
ILL.gltC-BSU18460.31~933	1019.37	0.921859	0.524948	1.75609	0.0790722	0.184561
ILL.gltD-BSU18440.17~1498	1272.93	1.56823	0.543247	2.88677	0.0038922	0.0162227
ILL.gltP-BSU02340.1~1245	53.3168	1.53979	0.652525	2.35973	0.018288	0.0582154
ILL.gltR-BSU26670.6~896	187.352	-0.582857	0.627303	-0.929147	0.352813	0.532303
ILL.gltT-BSU10220.66~1355	14608.6	-0.651827	0.454373	-1.43456	0.151412	0.295338
ILL.gltX-BSU00920.1~1452	10662.8	-0.160511	0.498707	-0.321854	0.747563	0.853377
ILL.glxK-BSU40040.25~1173	196.312	-0.794485	0.595633	-1.33385	0.182253	0.336212
ILL.glyA-BSU36900.1~1248	13680.7	-1.35232	0.475029	-2.84681	0.00441593	0.0180426
ILL.glyQ-BSU25270.83~970	7610.87	1.81054	0.671055	2.69805	0.00697473	0.0262933
ILL.glyS-BSU25260.1~2040	16343.9	1.66005	0.665422	2.49473	0.0126052	0.0427009
ILL.gmk-BSU15680.1~615	4385.46	-1.27805	0.459344	-2.78233	0.00539702	0.0212951
ILL.gmuA-BSU05820.1~333	462.704	2.96253	0.753913	3.92954	8.51102e-05	0.000569647
ILL.gmuB-BSU05810.1~312	525.148	2.66414	0.755313	3.5272	0.000419973	0.00235447
ILL.gmuC-BSU05830.1~1329	2107.65	2.47414	0.732486	3.37774	0.000730844	0.00381827
ILL.gmuD-BSU05840.1~1398	1776.83	1.86183	0.687704	2.70731	0.00678303	0.0257342
ILL.gmuE-BSU05860.29~928	421.455	-0.526678	0.668823	-0.78747	0.431007	0.606337
ILL.gmuF-BSU05870.1~948	310.282	-2.20718	0.801152	-2.75501	0.00586903	0.0228743
ILL.gmuG-BSU05880.1~1089	407.754	-1.99634	0.780805	-2.55677	0.0105648	0.0371247
ILL.gmuR-BSU05850.22~735	673.291	1.1992	0.651124	1.84173	0.0655145	0.161084
ILL.gntK-BSU40060.1~1542	1052.03	1.60532	0.590436	2.71888	0.00655034	0.0250351
ILL.gntP-BSU40070.1~1347	2367.03	-0.938703	0.485006	-1.93544	0.0529357	0.136985
ILL.gntR-BSU40050.16~747	474.059	2.4796	0.686213	3.61345	0.000302147	0.00175567
ILL.gntZ-BSU40080.4~1410	6039.95	-1.53168	0.495019	-3.09419	0.00197351	0.00909484
ILL.gpr-BSU25540.154~1260	188.458	3.62992	0.629199	5.76912	7.96856e-09	1.27466e-07
ILL.gpsA-BSU22830.1~1038	7498.53	-0.0896308	0.547054	-0.163843	0.869855	0.927144
ILL.greA-BSU27320.77~550	7288.58	-0.221014	0.485908	-0.454848	0.649219	0.784859
ILL.groEL-BSU06030.1~1635	56114.3	-0.599672	0.526173	-1.13969	0.254417	0.42778
ILL.groES-BSU06020.10~294	9632.44	-0.74822	0.502833	-1.48801	0.136748	0.276176
ILL.grpE-BSU25480.1~564	5189.36	-0.800696	0.538327	-1.48738	0.136915	0.276297
ILL.gsaB-BSU08710.23~1312	2365.03	-0.835118	0.461764	-1.80854	0.0705227	0.170564
ILL.gsiB-BSU04400.13~384	535.538	6.97699	1.07926	6.46458	1.01582e-10	2.14722e-09
ILL.gspA-BSU38430.1~861	598.924	4.11758	0.971899	4.23663	2.269e-05	0.000177033
ILL.gtaB-BSU35670.73~951	7950.96	-0.461669	0.604082	-0.764249	0.444719	0.619526
ILL.guaA-BSU06360.88~1629	18610	-1.02177	0.535606	-1.90769	0.0564314	0.14414
ILL.guaB-BSU00090.1~1467	30783	-0.600082	0.472227	-1.27075	0.203817	0.363737
ILL.guaC-BSU32130.44~1024	743.265	-0.678275	0.544569	-1.24553	0.212938	0.375737
ILL.guaD-BSU13170.125~595	151.095	3.50712	0.581014	6.03621	1.57777e-09	2.90521e-08
ILL.gudB-BSU22960.39~1322	16664.3	-0.326182	0.542404	-0.601363	0.547598	0.704128
ILL.gudD-BSU02490.1~1368	17.2657	-0.380439	0.899305	-0.423037	0.672268	0.801268
ILL.gudP-BSU02480.1~1368	43.0618	-0.599528	0.682502	-0.878427	0.379712	0.558052
ILL.gutB-BSU06150.109~1170	194.101	-0.152171	0.547466	-0.277956	0.781046	0.872909
ILL.gutP-BSU06160.74~1465	68.0639	-0.284323	0.60991	-0.466172	0.641092	0.780335
ILL.gutR-BSU06140.4~2493	1121.76	-0.468387	0.581923	-0.804895	0.42088	0.597932
ILL.gyrA-BSU00070.211~2676	18439.6	-0.803764	0.454035	-1.77027	0.0766825	0.180304
ILL.gyrB-BSU00060.17~1933	10736.3	-0.802102	0.461201	-1.73916	0.0820067	0.189595
ILL.hag-BSU35360.95~1009	43380.1	-6.03727	0.53447	-11.2958	1.3761e-29	3.4189e-27
ILL.hbs-BSU22790.200~478	70737.6	0.0990015	0.458222	0.216056	0.828944	0.901547
ILL.helD-BSU33450.54~2378	11427.2	2.61881	0.628022	4.16994	3.04686e-05	0.000228266
ILL.hemA-BSU28170.75~1442	3750.96	0.432929	0.467276	0.926496	0.354188	0.533989
ILL.hemAT-BSU10380.1~1299	1372.01	-6.00565	0.547259	-10.9741	5.09298e-28	1.05501e-25
ILL.hemB-BSU28130.1~975	2090.23	0.0335846	0.501596	0.0669554	0.946617	0.969072
ILL.hemC-BSU28150.33~977	1470.45	0.486888	0.505042	0.964055	0.335019	0.513239
ILL.hemD-BSU12230.39~851	936.74	-0.0282596	0.483459	-0.058453	0.953388	0.973502
ILL.hemD-BSU28140.1~789	1152.57	0.112089	0.54321	0.206346	0.836521	0.905357
ILL.hemE-BSU10120.38~1099	1283.14	-1.13954	0.516218	-2.20747	0.0272811	0.0806175
ILL.hemH-BSU10130.1~933	1616	-1.04278	0.493646	-2.1124	0.0346522	0.09813
ILL.hemL-BSU28120.1~1293	4664.91	0.00680395	0.458349	0.0148445	0.988156	0.993432
ILL.hemN-BSU25500.53~1192	1178.36	0.437674	0.639662	0.684227	0.493832	0.659982
ILL.hemX-BSU28160.1~831	989.878	0.867336	0.502904	1.72465	0.0845899	0.193622
ILL.hemY-BSU10140.1~1413	1728.25	-0.961862	0.502725	-1.9133	0.05571	0.14274
ILL.hemZ-BSU09840.2~1507	3711.55	1.1473	0.539144	2.128	0.0333368	0.0952512
ILL.hepS-BSU22760.164~919	8549.73	1.53511	0.653227	2.35005	0.0187711	0.0594561
ILL.hepT-BSU22740.1~1047	6677.46	0.63246	0.640799	0.986987	0.323649	0.501263
ILL.hfq-BSU17340.1~222	169.196	-0.922431	0.567083	-1.62662	0.103817	0.224858
ILL.hinT-BSU10030.29~466	1670.25	-0.0579076	0.581503	-0.0995827	0.920676	0.956219
ILL.hisA-BSU34880.1~738	32.1788	-0.82822	0.755158	-1.09675	0.27275	0.448949
ILL.hisB-BSU34900.1~585	17.681	-2.77669	1.00683	-2.75785	0.0058183	0.0226979
ILL.hisC-BSU22620.1~1083	3186.27	-0.33282	0.493702	-0.674132	0.500228	0.665097
ILL.hisD-BSU34910.1~1284	21.2448	-1.46518	0.88965	-1.64692	0.0995742	0.218968
ILL.hisF-BSU34870.1~759	27.5175	-1.5581	0.800097	-1.94739	0.0514879	0.134244
ILL.hisG-BSU34920.1~642	10.8936	-2.33773	1.36683	-1.71033	0.0872051	0.198076
ILL.hisH-BSU34890.1~639	12.5768	-1.53645	1.05882	-1.4511	0.146753	0.288424
ILL.hisI-BSU34860.1~630	36.7181	-1.08526	0.722002	-1.50312	0.132808	0.271314
ILL.hisJ-BSU29620.197~1003	793.428	-0.468329	0.491443	-0.952969	0.340606	0.518631
ILL.hisS-BSU27560.90~1364	2743.63	-0.419221	0.759418	-0.552029	0.580928	0.729553
ILL.hisZ-BSU34930.51~1226	23.2094	-1.35215	0.827599	-1.63382	0.102296	0.22245
ILL.hmp-BSU13040.13~1212	58.3651	2.02266	0.646402	3.1291	0.0017534	0.00819536
ILL.holA-BSU25560.25~1068	840.691	-0.37247	0.467865	-0.796104	0.425971	0.603506
ILL.holB-BSU00310.12~1001	6205.28	1.74533	0.709595	2.45962	0.0139085	0.0463951
ILL.hom-BSU32260.1~1302	1120.07	-1.98004	0.500435	-3.95664	7.60105e-05	0.000513722
ILL.hpr-BSU09990.41~652	2157.49	0.875472	0.623444	1.40425	0.160244	0.307503
ILL.hprK-BSU35000.35~967	2338.76	-0.180422	0.562173	-0.320936	0.748259	0.853377
ILL.hprP-BSU34970.1~651	1834	-0.779565	0.469956	-1.6588	0.0971558	0.215249
ILL.hprT-BSU00680.1~543	3742.55	-0.448478	0.504188	-0.889504	0.373732	0.552595
ILL.hrcA-BSU25490.1~1032	4123.55	0.69026	0.475861	1.45055	0.146906	0.288587
ILL.hslO-BSU00710.12~887	3850.98	0.540404	0.741478	0.728819	0.466112	0.637118
ILL.hslU-BSU16160.17~1420	7058.24	-0.750034	0.555401	-1.35044	0.176876	0.328168
ILL.htpG-BSU39820.83~1963	6020.62	-1.35788	0.498461	-2.72414	0.00644689	0.024731
ILL.htrA-BSU12900.43~1392	902.048	-0.0429024	0.58398	-0.0734656	0.941436	0.96745
ILL.htrB-BSU33000.1~1377	1179.73	-0.158198	0.49212	-0.321462	0.747861	0.853377
ILL.htrC-BSU40360.1~1203	11732.7	3.06104	0.814516	3.75811	0.000171202	0.0010634
ILL.hutG-BSU39380.1~960	147.763	2.25956	0.741433	3.04756	0.00230704	0.0104232
ILL.hutH-BSU39350.1~1527	268.808	5.35621	0.868526	6.16701	6.95931e-10	1.31655e-08
ILL.hutI-BSU39370.13~1278	221.893	2.25318	0.741296	3.03952	0.00236955	0.0106475
ILL.hutM-BSU39390.1~1428	62.8157	1.76929	0.746914	2.3688	0.0178459	0.0570052
ILL.hutP-BSU39340.3~458	249.546	2.22026	0.961717	2.30864	0.0209635	0.0647181
ILL.hutU-BSU39360.1~1659	326.379	2.74065	0.755602	3.6271	0.000286619	0.00167721
ILL.hxlA-BSU03460.8~640	222.326	-1.08446	0.614796	-1.76394	0.0777422	0.182278
ILL.hxlB-BSU03450.1~558	189.781	-0.877023	0.694446	-1.26291	0.206622	0.367554
ILL.hxlR-BSU03470.135~497	103.58	-1.14892	0.576155	-1.99412	0.0461387	0.123007
ILL.icd-BSU29130.1~1272	17049.4	-0.898382	0.543328	-1.65348	0.0982333	0.216929
ILL.ileS-BSU15430.53~2818	16745.2	-0.416339	0.743588	-0.559906	0.575543	0.726532
ILL.ilvA-BSU21770.23~1291	1066.4	0.811378	0.604211	1.34287	0.179313	0.332243
ILL.ilvB-BSU28310.122~1846	81.8278	-1.76186	0.641137	-2.74803	0.0059955	0.0233015
ILL.ilvC-BSU28290.24~1052	57.3443	-1.27167	0.660727	-1.92465	0.054273	0.139958
ILL.ilvD-BSU21870.166~1842	269.597	-0.300717	0.763062	-0.394092	0.693513	0.815793
ILL.ilvH-BSU28300.1~519	15.2796	-3.08755	1.23818	-2.49362	0.0126448	0.0428002
ILL.immA-BSU04810.1~510	261.901	0.689213	0.543341	1.26847	0.204629	0.364636
ILL.immR-BSU04820.25~408	417.185	0.811984	0.64237	1.26405	0.206214	0.366986
ILL.infA-BSU01390.1~219	9697.24	-3.41469	0.7087	-4.81825	1.44825e-06	1.53064e-05
ILL.infB-BSU16630.1~2151	33184.1	1.43384	0.462526	3.10002	0.00193507	0.00893755
ILL.infC-BSU28870.59~580	35283.8	0.406624	0.577368	0.704272	0.481263	0.649259
ILL.iolB-BSU39750.1~816	207.652	0.780868	0.821287	0.950786	0.341713	0.519459
ILL.iolC-BSU39740.1~978	201.649	0.343624	0.811702	0.423338	0.672049	0.801237
ILL.iolD-BSU39730.1~1914	429.986	0.0670308	0.772765	0.0867415	0.930877	0.961554
ILL.iolE-BSU39720.1~894	154.211	-0.572176	0.847911	-0.674807	0.499798	0.664812
ILL.iolF-BSU39710.1~1317	224.401	-1.14035	0.794393	-1.43549	0.151146	0.295098
ILL.iolG-BSU39700.1~1035	206.907	-1.07252	0.814591	-1.31664	0.187959	0.343651
ILL.iolH-BSU39690.1~870	171.708	-1.11754	0.857826	-1.30276	0.192656	0.350537
ILL.iolI-BSU39680.86~922	155.751	-1.32748	0.759663	-1.74745	0.0805587	0.186977
ILL.iolJ-BSU39670.21~893	172.305	-0.978674	0.659931	-1.483	0.138075	0.277827
ILL.iolR-BSU39770.17~772	1462.78	1.07604	0.605884	1.77598	0.0757355	0.178723
ILL.iolS-BSU39780.28~960	3147.62	0.551463	0.609546	0.90471	0.365619	0.544877
ILL.iolT-BSU06230.1~1422	204.501	2.83231	0.99482	2.84705	0.00441258	0.0180426
ILL.ipi-BSU11130.4~363	399.544	-0.530209	0.499345	-1.06181	0.288323	0.464253
ILL.ipk-BSU00460.22~891	7248.85	2.10966	0.708729	2.97668	0.00291389	0.0127076
ILL.iscS-BSU27510.1~1140	3893.86	0.465874	0.568969	0.818804	0.412898	0.58968
ILL.iscS-BSU29590.84~1229	1380.23	-0.103752	0.474568	-0.218625	0.826942	0.90032
ILL.iscU-BSU32680.1~444	6292.18	-0.923396	0.456259	-2.02384	0.0429864	0.116248
ILL.iseA-BSU18380.25~570	198.497	-3.72529	0.617651	-6.03138	1.62563e-09	2.98008e-08
ILL.ispA-BSU13190.33~992	62.6752	2.1886	0.797631	2.74388	0.00607174	0.0235095
ILL.ispA-BSU24280.1~891	1323.39	-0.0200474	0.569189	-0.035221	0.971904	0.984017
ILL.ispD-BSU00900.15~713	918.697	0.284947	0.515892	0.55234	0.580716	0.729553
ILL.ispF-BSU00910.1~477	394.048	0.568623	0.728241	0.780816	0.43491	0.610584
ILL.ispG-BSU25070.1~1134	3786.81	-0.829851	0.490887	-1.69051	0.0909298	0.204407
ILL.ispH-BSU25160.84~1028	2942.36	0.683579	0.523524	1.30573	0.191645	0.349005
ILL.jag-BSU41030.1~627	11517.5	-0.154348	0.653698	-0.236115	0.813343	0.891924
ILL.kamA-BSU19690.29~1444	15.0144	0.789303	1.12324	0.7027	0.482243	0.649734
ILL.kapB-BSU31460.1~387	307.572	0.145385	0.505663	0.287514	0.773718	0.868308
ILL.kapD-BSU31470.15~632	56.1867	0.905482	0.620034	1.46037	0.144188	0.285219
ILL.katA-BSU08820.10~1461	4284.3	1.25931	0.654107	1.92523	0.0542007	0.139958
ILL.katE-BSU39050.4~2064	326.951	4.14802	0.892545	4.6474	3.36143e-06	3.22554e-05
ILL.katX-BSU38630.30~1673	208.08	4.20544	0.912217	4.61013	4.02426e-06	3.80651e-05
ILL.kbaA-BSU01560.110~706	529.698	0.560659	0.573338	0.977886	0.328131	0.50537
ILL.kbl-BSU17000.1~1179	2861.06	2.16766	0.836644	2.59089	0.0095727	0.0342317
ILL.kdgA-BSU22100.2~592	150.974	1.08881	0.803109	1.35574	0.175182	0.326633
ILL.kdgK-BSU22110.1~975	395.098	1.12967	0.925442	1.22069	0.222204	0.388405
ILL.kdgR-BSU22120.34~1053	542.219	1.12231	1.03711	1.08216	0.279183	0.456182
ILL.kdgT-BSU22090.1~993	313.539	0.822476	0.660521	1.24519	0.213061	0.375781
ILL.kduD-BSU22140.2~766	201.192	-1.94813	0.552551	-3.5257	0.000422363	0.00236466
ILL.kduI-BSU22130.51~878	293.95	-1.80261	0.50724	-3.55376	0.000379763	0.00216418
ILL.khtS-BSU09870.5~343	183.975	0.422909	0.58074	0.728224	0.466477	0.637195
ILL.khtT-BSU09860.11~508	164.584	0.400602	0.553234	0.72411	0.468998	0.639375
ILL.kinA-BSU13990.51~1871	136.696	-1.75384	0.55639	-3.15218	0.00162056	0.00769071
ILL.kinB-BSU31450.14~1300	385.66	1.27461	0.488653	2.60842	0.00909618	0.03277
ILL.kinC-BSU14490.13~1299	1228	-0.587509	0.490902	-1.19679	0.231387	0.39966
ILL.kinD-BSU13660.1~1521	1143.24	-0.82966	0.462102	-1.79541	0.0725891	0.17434
ILL.kinE-BSU13530.17~2233	324.068	2.36626	0.701112	3.37501	0.000738122	0.00385144
ILL.kipA-BSU04090.3~1010	283.509	-0.516715	0.587188	-0.879983	0.378869	0.557405
ILL.kipI-BSU04080.1~723	190.983	0.18961	0.638289	0.29706	0.766421	0.864511
ILL.kipR-BSU04100.8~760	209.985	-0.516768	0.575119	-0.898541	0.368897	0.548776
ILL.ksgA-BSU00420.1~879	4218.96	1.06184	0.703033	1.51037	0.13095	0.269103
ILL.ktrA-BSU31090.73~741	634.767	1.54042	0.48901	3.15007	0.00163232	0.00773763
ILL.ktrB-BSU31100.7~1344	1195.31	1.39339	0.489686	2.84547	0.00443459	0.0180837
ILL.ktrC-BSU14510.1~666	1702.04	-0.217931	0.485529	-0.448853	0.653538	0.788077
ILL.ktrD-BSU13500.17~1366	2960.36	1.06682	0.506551	2.10604	0.0352009	0.0993443
ILL.lcfA-BSU28560.27~1709	2121.48	2.14592	0.540964	3.96685	7.28299e-05	0.00049303
ILL.lctP-BSU03060.1~1626	273.741	0.495797	0.697663	0.710654	0.477299	0.646648
ILL.ldh-BSU03050.54~1019	202.813	0.308277	0.706654	0.436249	0.662656	0.795072
ILL.lepA-BSU25510.24~1862	7356.31	-1.01337	0.539895	-1.87698	0.0605207	0.151503
ILL.leuA-BSU28280.1~1557	56.62	-2.38626	0.712823	-3.34762	0.000815085	0.00419491
ILL.leuB-BSU28270.1~1098	45.9295	-2.06307	0.696808	-2.96074	0.00306901	0.0132723
ILL.leuC-BSU28260.50~1468	93.8463	-2.53171	0.632703	-4.00141	6.29648e-05	0.000434772
ILL.leuD-BSU28250.1~600	35.0355	-1.33864	0.805594	-1.66168	0.096577	0.214426
ILL.leuS-BSU30320.110~2524	8324.12	-2.15339	0.45805	-4.70121	2.58624e-06	2.55723e-05
ILL.levB-BSU34460.1~1551	541.208	6.00076	0.937037	6.40397	1.51389e-10	3.10498e-09
ILL.levD-BSU27070.11~451	31.7196	1.23845	0.761381	1.62658	0.103827	0.224858
ILL.levE-BSU27060.1~489	35.9973	1.4265	0.785587	1.81584	0.0693949	0.168473
ILL.levF-BSU27050.12~821	50.9246	1.70617	0.674886	2.52809	0.0114686	0.0396616
ILL.levG-BSU27040.21~848	55.8846	1.33801	0.636567	2.10191	0.0355612	0.100088
ILL.levR-BSU27080.203~3010	552.408	1.68717	0.481354	3.50504	0.00045654	0.00251857
ILL.lexA-BSU17850.18~635	7124.2	1.77887	0.659019	2.69927	0.00694915	0.0262222
ILL.lgt-BSU34990.14~823	1968.5	-0.701418	0.488239	-1.43663	0.150824	0.294608
ILL.liaF-BSU33100.34~759	1744.7	2.59408	0.684222	3.79129	0.000149867	0.000942184
ILL.liaG-BSU33110.61~933	2864.23	2.88905	0.685693	4.21332	2.5164e-05	0.000191644
ILL.liaH-BSU33120.27~704	8325.38	5.54957	0.558602	9.93475	2.93927e-23	3.38261e-21
ILL.liaI-BSU33130.9~389	2957.58	5.6676	0.522009	10.8573	1.84141e-27	3.31694e-25
ILL.liaR-BSU33080.1~636	728.424	1.60103	0.691621	2.31489	0.0206189	0.0638922
ILL.liaS-BSU33090.1~1083	1908.2	2.03345	0.638382	3.18531	0.00144597	0.0069256
ILL.licA-BSU38570.1~333	161.884	1.94214	1.02395	1.8967	0.0578669	0.146707
ILL.licB-BSU38590.126~434	199.145	2.78193	0.966261	2.87906	0.00398861	0.0165869
ILL.licC-BSU38580.1~1359	716.894	2.65997	1.03349	2.57376	0.0100599	0.0355617
ILL.licH-BSU38560.1~1329	1006.5	1.99849	1.02721	1.94555	0.0517091	0.134567
ILL.licR-BSU38600.63~1988	1202.3	1.09944	0.571908	1.9224	0.0545554	0.140474
ILL.licT-BSU39080.1~834	813.661	0.791835	0.630338	1.25621	0.209041	0.370744
ILL.ligA-BSU06620.24~2030	2939.03	-1.58686	0.591146	-2.68438	0.00726637	0.027178
ILL.ligB-BSU20500.59~871	34.7035	2.53991	0.743417	3.41654	0.000634223	0.00337736
ILL.ligD-BSU13400.4~1839	90.8144	-0.918754	0.585819	-1.56832	0.116806	0.246716
ILL.lipA-BSU32330.39~935	5660.91	-0.487008	0.546157	-0.891699	0.372554	0.552444
ILL.lipC-BSU04110.64~705	197.442	-0.746557	0.577921	-1.2918	0.196428	0.355061
ILL.lmrA-BSU02680.26~592	696.667	0.717877	0.612447	1.17215	0.241138	0.412825
ILL.lmrB-BSU02670.40~1479	1102.55	-0.720547	0.730494	-0.986382	0.323946	0.501535
ILL.lonA-BSU28200.88~2412	7546.1	0.272129	0.456306	0.596374	0.550925	0.70687
ILL.lonB-BSU28210.1~1659	1435.63	5.49985	0.601273	9.14701	5.85321e-20	3.67422e-18
ILL.lpdV-BSU24060.1~1425	1802.84	-0.825109	0.522859	-1.57807	0.114549	0.242751
ILL.lplA-BSU07100.1~1509	71.064	1.63748	0.74978	2.18395	0.0289661	0.0849905
ILL.lplB-BSU07110.1~957	20.3642	-0.426631	0.851924	-0.500785	0.616522	0.759064
ILL.lplC-BSU07120.1~888	30.2402	0.526865	0.74367	0.708466	0.478656	0.647639
ILL.lplD-BSU07130.9~1349	61.8656	-0.282325	0.602471	-0.468611	0.639348	0.779064
ILL.lrgB-BSU38330.1~678	745.629	-3.96271	0.65245	-6.07359	1.25083e-09	2.32384e-08
ILL.lrpA-BSU05050.5~415	285.437	-0.560575	0.494647	-1.13328	0.257096	0.430189
ILL.lrpB-BSU05060.52~501	79.8451	-0.185741	0.680645	-0.27289	0.784938	0.87537
ILL.lrpC-BSU04250.12~446	393.958	1.31166	0.835381	1.57014	0.116383	0.246169
ILL.lspA-BSU15450.21~485	1495.33	0.138857	0.548056	0.253362	0.799989	0.884585
ILL.ltaSA-BSU07260.268~2187	12917.6	-0.364012	0.590342	-0.616611	0.537491	0.6961
ILL.luxS-BSU30670.2~475	1251.03	-1.38345	0.493192	-2.80509	0.00503029	0.0200776
ILL.lysA-BSU23380.1~1320	2924.17	-0.36487	0.472657	-0.771957	0.44014	0.615424
ILL.lysC-BSU28470.126~1352	2449.7	1.64152	0.753234	2.1793	0.0293098	0.0858165
ILL.lysP-BSU33330.104~1513	5681.28	2.31921	0.62268	3.72456	0.000195657	0.00119535
ILL.lysS-BSU00820.1~1500	9642.39	-0.320297	0.558607	-0.573385	0.566384	0.719133
ILL.lytA-BSU35640.21~329	629.981	-1.0992	0.556385	-1.97562	0.0481981	0.127757
ILL.lytB-BSU35630.1~2118	3266.97	-1.24074	0.508715	-2.43896	0.0147295	0.0485476
ILL.lytC-BSU35620.39~1529	2602.62	-1.43854	0.531405	-2.70705	0.00678832	0.0257342
ILL.lytD-BSU35780.44~2686	3869.93	-2.13696	0.460614	-4.63938	3.49464e-06	3.34372e-05
ILL.lytE-BSU09420.1~1005	946.985	-1.13806	0.476482	-2.38847	0.0169186	0.0545053
ILL.lytF-BSU09370.153~1619	3423.84	-2.81435	0.639929	-4.39791	1.09301e-05	9.15025e-05
ILL.lytG-BSU31120.21~869	3285.77	1.45504	0.547509	2.65757	0.00787074	0.0288315
ILL.lytH-BSU32340.166~1146	91.3877	-0.511955	0.59904	-0.854625	0.392759	0.570147
ILL.lytR-BSU35650.39~959	1862.27	-2.46025	0.486817	-5.05376	4.33202e-07	5.15735e-06
ILL.lytS-BSU28930.82~1863	814.198	0.1252	0.48547	0.257894	0.796489	0.882078
ILL.lytT-BSU28920.1~726	382.25	-0.985537	0.520269	-1.89429	0.0581872	0.147083
ILL.maa-BSU40850.1~555	418.969	3.52767	0.631212	5.58872	2.28751e-08	3.34882e-07
ILL.maeN-BSU31580.154~1500	696.722	-1.63664	0.610843	-2.67932	0.00737719	0.0275597
ILL.maf-BSU28050.26~595	2091.66	1.11266	0.589687	1.88687	0.0591783	0.148952
ILL.malA-BSU08180.1~1350	755.707	1.21626	0.940552	1.29313	0.195965	0.354706
ILL.malL-BSU34560.1~1686	162.874	-0.0822399	0.535935	-0.153451	0.878042	0.931318
ILL.malP-BSU08200.1~1584	368.412	1.75083	0.900682	1.9439	0.0519078	0.134913
ILL.malQ-BSU08210.1~1722	329.19	0.248369	0.586371	0.42357	0.671879	0.801237
ILL.malR-BSU08190.11~775	205.662	0.797414	0.823946	0.967798	0.333145	0.511193
ILL.malS-BSU29880.82~1782	3954.85	1.43455	0.569495	2.51899	0.0117692	0.0404309
ILL.manA-BSU12020.1~948	4224.67	-0.257309	0.627877	-0.409807	0.681947	0.808617
ILL.manP-BSU12010.1~1953	7140.63	-0.0835321	0.65138	-0.128239	0.89796	0.945425
ILL.manR-BSU12000.1~1947	3781.8	1.31168	0.670707	1.95568	0.0505034	0.132512
ILL.mapA-BSU01380.1~747	37081.9	-3.34644	0.689087	-4.85634	1.19575e-06	1.29686e-05
ILL.mbl-BSU36410.10~1011	11210.1	-1.30619	0.469614	-2.78141	0.0054124	0.0213354
ILL.mccA-BSU27260.58~981	323.043	-1.0912	0.556465	-1.96095	0.0498854	0.131139
ILL.mcpA-BSU31240.1~1986	2904.58	-5.62263	0.531274	-10.5833	3.5622e-26	5.466e-24
ILL.mcpB-BSU31260.1~1989	1954.23	-4.14909	0.514256	-8.06814	7.13773e-16	2.98703e-14
ILL.mcpC-BSU13950.3~1970	1900.95	-3.27142	0.548798	-5.96107	2.50587e-09	4.4178e-08
ILL.mcsA-BSU00840.14~571	1296.88	1.35726	0.75036	1.80881	0.0704799	0.17056
ILL.mcsB-BSU00850.1~1092	4196.13	1.57079	0.765176	2.05284	0.0400879	0.110139
ILL.mdh-BSU29120.44~982	13872.4	-0.886577	0.561144	-1.57994	0.11412	0.242088
ILL.mdr-BSU03070.7~1545	3051.08	-0.566442	0.597404	-0.948173	0.343042	0.521167
ILL.mdxD-BSU34620.1~1770	519.139	3.87571	0.521386	7.43349	1.05772e-13	3.29485e-12
ILL.mdxE-BSU34610.1~1254	283.359	2.40519	0.548946	4.38147	1.17881e-05	9.82659e-05
ILL.mdxF-BSU34600.1~1308	173.593	1.66393	0.562495	2.95813	0.00309512	0.0133574
[truncated: 3,258 more rows]

## Sheet: Legend
Supplementary file 5. Results of differential expression analysis.
[truncated: 7 more rows]
