# Supplementary material for: NusG is an intrinsic transcription termination factor that stimulates motility and coordinates gene expression with NusA
Source: eLife journal article supplement (doi:10.7554/elife.61880), 2021-04-09
Supplement: supp [file elife-61880-supp-v1.zip › elife_poa_e61880_Supplementary_file_6.xlsx]

## Sheet: TPM
transcript	WT Rep. 1	WT Rep. 2	WT Merged	nusAdep Rep. 1	nusAdep Rep. 2	nusAdep Merged	ΔnusG Rep. 1	ΔnusG Rep. 2	ΔnusG Merged	nusAdep ΔnusG Rep. 1	nusAdep ΔnusG Rep. 2	nusAdep ΔnusG Merged
ILL.aadK-BSU26790.74~928	13.07	15.04	13.98	13.74	14.91	14.32	10.69	9.33	9.82	10.08	6.38	8.05
ILL.aapA-BSU27090.37~1425	38.32	44.62	41.2	29.53	33.83	31.67	8.11	56.95	32.03	13.42	42.19	27.87
ILL.abfA-BSU28720.1~1503	1.62	1.78	1.69	1.77	2.18	1.98	1.79	2.63	2.18	2.14	1.44	1.75
ILL.abh-BSU14480.27~305	513.03	586.15	546.78	156.16	148.25	152.32	147.58	292.1	215.88	5.37	78.7	42.36
ILL.abnA-BSU28810.1~972	0.67	0.55	0.62	0.24	0.41	0.32	8.28	1.84	5	10.51	2.77	6.4
ILL.abnB-BSU39330.134~1543	1.54	1.39	1.47	0.83	0.41	0.62	1.54	1.06	1.28	0.5	0.62	0.55
ILL.abrB-BSU00370.67~357	554.23	593.98	573.17	794.81	606.64	702.04	348.65	806.98	567.3	1858.65	1747.46	1778.67
ILL.accA-BSU29200.1~978	353.69	429.66	388.4	408.41	417.64	413.15	238.15	318.71	274.46	110.57	164.78	136.64
ILL.accB-BSU24350.58~537	397.95	423.11	409.99	239.9	287.84	263.73	265.35	383.91	320.03	152.77	214.43	182.04
ILL.accC-BSU24340.12~1364	436.87	512.24	471.45	304.36	362.81	333.43	327.17	472.21	393.35	153.97	236.65	193.84
ILL.accD-BSU29210.335~1207	284.94	345.64	312.57	310.74	327.41	319.13	185.3	264	221.43	102.24	150.85	125.57
ILL.acdA-BSU37170.1~1140	6.76	6.71	6.74	7.77	8.61	8.19	9.97	11.32	10.52	134.8	13.71	71.22
ILL.ackA-BSU29470.82~1269	1109.24	1350.8	1219.54	618.13	752.46	684.89	419.69	914.19	656.77	117.8	681.46	402.93
ILL.acoA-BSU08060.1~1002	0.22	0.18	0.2	1.94	1.62	1.78	1.91	3.06	2.43	6.52	11.83	9.13
ILL.acoB-BSU08070.1~1029	0.24	0.52	0.37	2.14	2.27	2.21	3.75	3.74	3.69	8.04	11.94	9.91
ILL.acoC-BSU08080.1~1197	1.47	2.11	1.76	3.51	4.85	4.18	6.04	5.8	5.84	10.72	14.68	12.58
ILL.acoL-BSU08090.21~1397	2.38	2.19	2.3	4.1	5.08	4.59	8.78	7.86	8.2	16.1	9.98	12.76
ILL.acoR-BSU08100.1~1818	13.54	11.14	12.49	13	14.63	13.81	56.82	28.69	42.15	130.07	15.28	69.77
ILL.acpK-BSU17130.1~249	0.54	0.34	0.45	0.89	1.51	1.19	0	0	0	0	1.24	0.63
ILL.acpP-BSU15920.3~236	6492.18	6400.02	6459.66	2822.21	1901.43	2368.05	7511	5827.62	6549.92	3023.3	3355.35	3156.25
ILL.acpS-BSU04620.42~407	20	19.8	19.91	17.7	18.86	18.28	15.1	21.07	17.82	9.31	29.45	19.41
ILL.acsA-BSU29680.16~1734	34.76	32.82	33.81	125.45	122.89	124.23	32.49	30.46	31.06	87.93	35.59	59.89
ILL.acuA-BSU29690.23~655	56.43	44.58	51.25	94.92	92.92	93.97	51.31	47.95	48.93	103.56	48.32	74.07
ILL.acuB-BSU29700.27~671	59.69	52.4	56.55	105.45	95.59	100.62	51.24	51.96	50.95	106.13	48.91	75.59
ILL.acuC-BSU29710.1~1164	43.93	41.19	42.79	72.43	71.45	71.97	37.19	43.05	39.42	71.09	28.2	48.24
ILL.adaA-BSU01810.111~746	2.5	2.02	2.29	2.26	2.3	2.28	0.58	4.03	2.32	3.43	10.58	7.13
ILL.adaB-BSU01820.1~540	94.88	39.14	70.15	14.99	21.42	18.18	19.53	28.86	23.86	45.99	40	42.3
ILL.adcA-BSU02850.34~993	51.15	59.59	55.03	50.51	35.34	43.02	26.7	48.63	37.17	41.13	36.46	38.17
ILL.adcB-BSU02870.1~843	27.97	27.89	27.99	78.31	76	77.2	10.74	54.8	32.15	58.58	59.33	58.14
ILL.adcC-BSU02860.56~751	39.37	40.14	39.8	93.01	83.56	88.37	12.65	72.09	41.62	86.88	100.32	92.5
ILL.addA-BSU10630.1~3699	25.68	29.05	27.24	35.01	34.79	34.92	20.54	20.28	20.1	8.94	10.86	9.79
ILL.addB-BSU10620.11~3511	15.43	18.59	16.87	18.7	19.5	19.11	18.42	14.33	16.09	16.41	13.3	14.58
ILL.adeC-BSU14520.13~1746	161.49	200.41	179.23	386.14	340.41	363.67	37.05	121.24	77.95	103.4	516.39	312.2
ILL.adhA-BSU27010.59~1108	6.46	6.08	6.3	14.14	11.41	12.79	4.41	6.67	5.46	6.45	4.85	5.55
ILL.adhB-BSU26970.1~1137	0.15	0.42	0.27	0.43	0.27	0.35	0.23	0.2	0.21	0.45	0.63	0.53
ILL.adk-BSU01370.55~708	3768.67	4051.91	3903.08	2929.2	4969.47	3940.3	2450.95	2748.21	2561.1	119.13	653.69	389.14
ILL.ahpC-BSU40090.345~908	907.21	958.59	932.07	733.73	693.95	714.36	794.33	1125.54	946.21	1476.87	1403.42	1418.9
ILL.ahpF-BSU40100.14~1543	1017.77	1252.41	1124.8	1089.82	854.45	973.79	1328.33	1327.65	1307.79	1654.86	1313.97	1457.61
ILL.ahrC-BSU24250.98~547	62.97	83.29	72.19	269.98	359.46	314.38	67.91	128.44	96.44	59.97	145.89	102.9
ILL.alaS-BSU27410.80~2716	130.11	135.11	132.61	168.44	234.47	201.2	144.9	254.26	196.67	54.24	231.26	143.61
ILL.alaT-BSU31400.1~1161	129.99	159.38	143.4	257.95	269.76	263.9	80.95	88.67	83.41	25.03	36.41	30.48
ILL.albA-BSU37370.1~1347	20.24	19.39	19.9	19.34	23.53	21.42	17.37	17.31	17.07	10.8	11.47	10.99
ILL.albB-BSU37380.1~162	31.85	30.54	30.82	32.8	42.33	37.53	17.34	42.53	28.21	15.58	27.27	21.18
ILL.albC-BSU37390.1~720	15.8	15.79	15.33	17.3	18.84	18.07	11.76	14.14	12.44	6.71	9.37	7.6
ILL.albD-BSU37400.1~1311	9.7	8.94	9.38	10.81	12.17	11.49	6.43	8.83	7.53	2.87	5.76	4.3
ILL.albE-BSU37410.1~1161	4.77	5.09	4.92	5.51	5.02	5.27	3.08	4.18	3.66	1.68	2.63	2.16
ILL.albF-BSU37420.5~1285	3.03	2.62	2.86	2.57	2.18	2.38	0.96	2.08	1.5	0.78	2.08	1.43
ILL.albG-BSU37430.1~702	2.14	1.77	1.98	2.79	3.75	3.27	0.69	1.27	0.97	0.53	0.93	0.72
ILL.ald-BSU31930.15~1151	488	652.44	562.49	3473.58	3406.94	3442.1	822.34	553.77	677.93	1560.15	98.61	793.95
ILL.aldX-BSU39860.1~1338	6.96	6.48	6.76	6.8	7.19	7	5.65	7.68	6.57	2.93	4.02	3.44
ILL.aldY-BSU38830.1~1458	0.73	1.67	1.15	0.56	0.8	0.68	0.94	1.29	1.1	3.26	1.83	2.48
ILL.alkA-BSU01800.26~937	9.67	11.13	10.34	11.8	15.35	13.56	7.44	10.86	9	4.29	5.47	4.83
ILL.alrA-BSU04640.20~1189	78.3	80.05	79.12	64.8	61	62.95	36.7	59.45	47.22	26.83	58.65	42.63
ILL.alrB-BSU17640.457~1641	0.31	0.61	0.44	0.46	0.68	0.57	0.19	0.73	0.45	0.3	0.62	0.46
ILL.alsD-BSU36000.62~829	32.36	33.33	32.77	40.22	43.01	41.62	21.88	28.2	24.68	30.11	54.19	41.88
ILL.alsR-BSU36020.21~929	12.63	12.22	12.47	18.97	16.26	17.64	9.75	12.14	10.79	14.42	11.94	12.98
ILL.alsS-BSU36010.2~1714	10.74	12.07	11.36	12.82	13.7	13.26	11.41	14.15	12.56	6.98	9.96	8.39
ILL.alsT-BSU18120.45~1442	203.94	244.3	222.41	68.81	86.36	77.52	118.42	339.26	225.36	149.34	230.6	188.57
ILL.amhX-BSU03010.50~1201	1.96	2.61	2.25	44.9	34.53	39.79	1.13	1.35	1.22	2	4.34	3.16
ILL.ampS-BSU14450.14~1246	61.85	69.49	65.36	63.54	44.45	54.12	41.78	62.82	51.53	59.61	50.98	54.37
ILL.amtB-BSU36510.23~1237	2.51	2.55	2.53	2.49	3.63	3.05	1.15	2.01	1.56	2.81	1.74	2.21
ILL.amyC-BSU30290.1~831	1.39	1.03	1.23	2.54	2.07	2.31	1.27	2.16	1.69	32.06	4.81	17.76
ILL.amyD-BSU30280.1~912	1.36	0.8	1.11	1.82	1.68	1.75	1.46	1.31	1.37	30.86	4.16	16.85
ILL.amyE-BSU03040.1~1980	16.25	19.11	17.56	46.43	43.43	44.97	14.77	33.45	23.74	43.68	29.85	35.99
ILL.amyX-BSU29930.6~2162	27.26	32.43	29.63	65.8	73.08	69.43	16.38	22.3	19.07	8.69	14.07	11.3
ILL.ansA-BSU23580.146~1135	467.91	450.37	461.02	28.58	28.15	28.38	23.45	95.98	58.8	22.05	73.61	48.01
ILL.ansR-BSU23590.29~379	103.43	132.16	116.49	17.35	17.32	17.34	19.99	52.73	35.67	22.84	56.63	39.66
ILL.ansZ-BSU02690.15~1142	3	2.42	2.75	3.17	2.59	2.89	1.04	1.82	1.41	2.01	2.23	2.09
ILL.antE-BSU25220.1~297	1.08	1.79	1.4	2.73	2.12	2.43	2.6	1.66	2.11	1.86	1.22	1.58
ILL.appB-BSU11390.87~1037	2.99	3.49	3.22	173.71	90.36	132.53	0.85	2.11	1.46	2.57	2.37	2.43
ILL.appC-BSU11400.1~912	2.53	4.23	3.29	182.09	101.06	142.06	1.51	2.45	1.95	1.88	2.4	2.11
ILL.appD-BSU11360.1~987	1.02	1.5	1.24	85.79	49.57	67.9	0.5	0.27	0.36	1.01	0.7	0.84
ILL.appF-BSU11370.1~990	3.03	3.92	3.44	221.11	118	170.17	1.15	1.01	1.06	2.22	0.96	1.55
ILL.aprE-BSU10300.27~1172	2.55	2.65	2.6	17.25	8.24	12.8	1.48	0.88	1.16	3	1.46	2.17
ILL.aprX-BSU17260.30~1358	0.54	0.76	0.64	1.32	1.24	1.28	0.43	0.7	0.55	3.19	2.96	3.04
ILL.apt-BSU27610.6~518	240.83	308.8	271.62	117.26	120.25	118.79	241.01	318.48	278.49	70.57	210.01	140.74
ILL.araA-BSU28800.1~1491	4.21	3.42	3.86	2.55	2.41	2.48	9.26	5.75	7.4	8.04	3.8	5.77
ILL.araB-BSU28790.1~1683	2.8	2.4	2.63	1.24	1.66	1.45	6.7	4.25	5.4	4.09	2.04	2.99
ILL.araD-BSU28780.1~690	3.14	1.32	2.33	1.76	1.79	1.78	5.84	4.85	5.16	3.7	1.9	2.8
ILL.araE-BSU33960.1~1395	2.92	2.82	2.88	1.2	1.09	1.15	3.98	2.57	3.23	12.69	2.37	7.26
ILL.araL-BSU28770.1~819	2.41	1.86	2.15	1.52	2.11	1.81	3.85	3.79	3.81	2.95	1.44	2.14
ILL.araM-BSU28760.1~1185	1.84	1.33	1.61	1.22	1.54	1.38	2.36	3.09	2.71	2.57	1.44	1.96
ILL.araN-BSU28750.1~1302	1.84	1.32	1.61	1.61	1.97	1.79	1.59	2.72	2.11	2.6	1.2	1.85
ILL.araP-BSU28740.1~942	0.81	0.81	0.81	1.5	1.36	1.43	0.85	1.58	1.2	1.25	0.74	0.97
ILL.araQ-BSU28730.1~846	0.7	0.54	0.63	0.76	0.58	0.67	1.01	1.2	1.09	0.95	0.84	0.88
ILL.araR-BSU33970.1~1155	38.15	39.86	39	33.16	33.66	33.42	48.51	60.86	53.89	54.91	55.27	54.3
ILL.arfM-BSU37290.1~477	0.64	0.34	0.5	0.2	0	0.1	0	0.19	0.09	0.54	0.1	0.31
ILL.argB-BSU11210.15~791	0.24	0.41	0.32	1.69	2.98	2.33	0.5	0.35	0.44	0	0.16	0.11
ILL.argC-BSU11190.19~1056	1.12	1.72	1.39	3.83	3.88	3.86	0.74	2.53	1.61	1.38	3.2	2.31
ILL.argD-BSU11220.1~1158	0.29	0.42	0.35	1.54	1.32	1.43	0.3	0.15	0.22	0.17	0.19	0.18
ILL.argF-BSU11250.1~960	2.49	3.19	2.81	2.2	2.91	2.55	1.89	2.03	1.93	1.59	3.15	2.36
ILL.argG-BSU29450.14~1225	9.18	9.36	9.26	24.64	25.36	25.01	7.38	17.97	12.69	5.6	56.45	32.18
ILL.argH-BSU29440.1~1386	8.27	11.28	9.63	24.09	30.54	27.29	9.37	17.14	13.03	4.8	46.41	25.92
ILL.argI-BSU40320.54~944	43.53	62.56	52.14	62.11	62.6	62.39	20.9	43.56	31.77	28.45	90.99	59.86
ILL.argJ-BSU11200.20~1240	1.13	0.94	1.05	4.29	4.04	4.17	0.32	0.56	0.45	0.27	1.21	0.74
ILL.argS-BSU37330.1~1671	208.53	267.55	235.25	182.83	186.76	184.85	207.22	277.5	238.74	95.3	110.23	101.7
ILL.aroA-BSU29750.140~1216	372.97	485.28	423.98	1225.65	997.41	1113.2	193.06	291.78	238.84	552.09	441.37	487.86
ILL.aroB-BSU22700.1~1089	80.24	112.87	95	609.48	604.26	607.16	98.09	119.48	106.99	301.43	275.18	283.77
ILL.aroD-BSU23080.86~853	45.74	60.17	52.29	94.26	102.08	98.17	53.08	114.55	82.54	64.01	129.82	96.6
ILL.aroE-BSU22600.1~1287	131.19	168.42	148.11	169.24	131.07	150.42	101.87	128.39	113.16	40.96	65.28	52.77
ILL.aroE-BSU25660.18~860	180.14	208.73	193.3	226.04	308.41	266.91	92.36	245.09	166.1	44.05	143.97	94.24
ILL.aroF-BSU22710.3~1175	80.65	106.29	92.29	534.18	528.59	531.65	104.87	129.47	115.47	374.78	371.01	367.48
ILL.aroH-BSU22690.1~384	119.23	151.31	133.76	699.71	837.49	768.21	90.64	146.15	116.6	251.65	277.74	261.42
ILL.aroK-BSU03150.117~677	49.15	46.24	47.82	48.45	35.09	41.86	36.81	46.54	40.98	49.74	55.3	51.81
ILL.arsB-BSU25790.23~1063	8.29	11.08	9.56	8.3	10.66	9.47	4.28	10.59	7.32	5.89	6.96	6.35
ILL.arsC-BSU25780.12~431	20.05	19.5	19.84	16.76	22.75	19.73	10.98	19.75	15.33	9.95	13.31	11.46
ILL.arsR-BSU25810.11~328	14.6	14.34	14.51	7.84	8.96	8.4	6.72	13.46	9.91	12.04	11.14	11.43
ILL.artP-BSU23980.38~805	33.78	39.68	36.49	5.77	6.1	5.94	16.87	34.32	25.2	2.9	25.32	14.26
ILL.artQ-BSU23970.70~729	12.31	14.64	13.38	6.79	7.57	7.18	10.93	19.78	15.12	3.59	13.43	8.54
ILL.artR-BSU23960.1~723	25.83	26.94	26.38	12.41	16.82	14.6	18.21	33.22	25.32	6.8	25.16	16.03
ILL.asd-BSU16750.57~1097	349.02	420.05	380.92	801.32	849.06	825.29	256.81	304.16	276.62	300.44	631.22	466.02
ILL.aseR-BSU05330.44~379	11.19	10.91	11.09	7.58	8.31	7.94	8.8	14.91	11.6	4.56	5.92	5.19
ILL.aslA-BSU39900.1~270	0.22	1.4	0.75	3.41	2.24	2.84	0.46	0	0.23	0.53	0	0.26
ILL.asnB-BSU30540.150~2048	420.62	468.78	443	233.68	280.64	257.03	263.95	612.17	432.09	117.34	435.23	277.54
ILL.asnC-BSU22360.1~1293	676.34	740.42	705.73	932.2	864.14	898.92	677.65	888.48	768.35	308.69	577.36	440.15
ILL.asnH-BSU39920.1~2244	3.3	2.77	3.07	2.61	2.33	2.47	2.28	3.63	2.91	2.4	2.3	2.31
ILL.asnO-BSU10790.1~1845	0.64	1.54	1.04	0.55	0.84	0.7	1.6	6.51	3.99	0.61	9.38	5.08
ILL.aspA-BSU23570.45~1472	515.84	543.16	528.84	35.55	35.14	35.36	32.97	136.96	83.64	24.48	79.22	51.94
ILL.aspB-BSU22370.23~1204	486.52	527.26	505.45	647.47	547.58	598.31	391.07	514.4	448.06	217.19	351.92	283.7
ILL.aspS-BSU27550.1~1779	110.56	133.7	120.98	44.25	59.65	51.9	96.74	102.89	98.38	18.59	126.22	73.41
ILL.atpA-BSU36830.17~1525	1075.02	1350.41	1200.11	1404.24	1341.84	1373.95	997.81	1106.54	1037.12	324.07	710.21	516
ILL.atpB-BSU36870.1~735	1459.61	1847.22	1635.52	1184.39	1078.7	1132.59	1145.42	1657.57	1381.56	493.48	1039.72	764.27
ILL.atpC-BSU36800.24~422	1252.19	1888.04	1535.07	1755.24	1799.33	1777.83	1706.52	1601.96	1620.63	328.86	555.48	443.21
ILL.atpD-BSU36810.26~1447	1141.73	1559.65	1329.88	1511.19	1499.63	1506.12	1231.72	1223.23	1207.14	228.74	473.58	350.53
ILL.atpE-BSU36860.46~258	1910.11	2548.2	2198.16	1664.23	1446.66	1557.34	1597.83	1991.18	1863.64	670.97	1311.36	1024.39
ILL.atpF-BSU36850.4~516	1491.13	1702.58	1588.77	1524.86	1576.55	1551.11	891.66	1476.64	1166.14	348.19	992.13	670.58
ILL.atpG-BSU36820.1~864	1149.52	1353.65	1242.76	1301.13	1432	1366.47	919.35	1068.96	964.4	180.49	530.09	355.69
ILL.atpH-BSU36840.1~546	1315.02	1528.93	1413.39	1362.48	1547.55	1454.67	794.65	1291.93	1013.66	288.55	914.96	602.77
ILL.atpI-BSU36880.271~654	392.17	571.94	473.33	360.53	386.63	373.61	291.35	644.59	460.44	168.84	393	280.6
ILL.azlB-BSU26720.1~474	16.29	12.76	14.75	31.42	32.98	32.21	8.27	11.26	9.62	8.17	13.13	10.68
ILL.azlC-BSU26710.1~765	11.56	11.9	11.74	29.19	31.94	30.57	5.98	9.12	7.43	5.64	11.04	8.31
ILL.azlD-BSU26700.1~333	15.81	15.78	15.83	41.62	39.05	40.37	11.28	15.41	12.99	9.54	15.68	12.53
ILL.bacA-BSU37740.5~619	1.74	2.31	2	25.36	11.57	18.54	1.2	0.2	0.7	4.4	1.82	3.03
ILL.bacB-BSU37730.1~708	3.42	3.64	3.53	37.67	18.7	28.3	2.55	2.12	2.3	3.59	1.66	2.56
ILL.bacC-BSU37720.1~768	3.73	5.52	4.54	39.61	22.79	31.3	2.1	1.46	1.71	2.99	1.62	2.19
ILL.bacD-BSU37710.1~1419	6.29	6.71	6.49	43.47	29.44	36.54	3.15	3.14	3.1	2.71	1.86	2.24
ILL.bacE-BSU37700.1~1185	6.11	8.17	7.05	34.93	19.85	27.48	2.98	3.31	3.08	1.18	1.14	1.12
ILL.bcd-BSU24080.12~1106	67.84	68.84	68.43	57.25	54.15	55.74	152.17	75.12	112.14	85.28	67.75	75.15
ILL.bceA-BSU30380.102~863	4.28	3.88	4.11	7.94	8.44	8.19	1.61	5.32	3.41	2.98	7.19	5.08
ILL.bceB-BSU30370.1~1941	3.37	4.16	3.73	7.51	10.52	9	1.79	4.56	3.12	2.33	5.34	3.83
ILL.bceR-BSU30400.61~756	15.84	15.74	15.83	40.61	43.24	41.93	10.98	14.11	12.36	9.09	8.32	8.57
ILL.bceS-BSU30390.1~1005	19.94	22.12	20.96	45.99	56.67	51.3	11.63	16.57	13.88	10.28	9.85	9.89
ILL.bcrC-BSU36530.9~590	102.55	98.82	101.1	76.49	85.37	80.92	18.78	74.06	45.62	5.74	54.94	30.65
ILL.bcsA-BSU22050.74~1171	0.42	0.33	0.38	0.55	0.76	0.65	1.6	4.35	2.93	0.54	3.99	2.3
ILL.bdbA-BSU21460.1~414	15.91	26.42	20.64	11.45	21.18	16.27	0.46	1.07	0.75	1.07	1.01	1.02
ILL.bdbB-BSU21440.1~447	15.58	29.31	21.75	16.01	23.67	19.81	0.45	4.06	2.21	3.34	5.52	4.4
ILL.bdbC-BSU33470.5~421	313.77	361.25	335.54	294.65	241.61	268.53	221.07	326.72	271.72	247.14	176.97	208.82
ILL.bdbD-BSU33480.1~669	314.34	326.07	320.08	251.3	218.91	235.38	171.72	296.34	229.68	213.47	175.39	191
ILL.bdhA-BSU06240.263~1303	529.18	601.17	562.47	580.28	673.31	626.58	461.62	449.55	449.08	500.91	183.34	332.13
ILL.besA-BSU32010.59~928	65.25	64.03	64.84	32.29	15.75	24.11	67.02	50.76	57.96	21.29	24.62	22.68
ILL.bglA-BSU40110.14~1453	30.84	22.99	27.39	15.53	18.52	17.02	42.04	43.89	42.37	56.05	32.43	43.23
ILL.bglC-BSU03410.1~1434	3.46	3.88	3.64	12.79	13.06	12.93	2.98	4.81	3.96	12.38	9.04	10.6
ILL.bglH-BSU39260.23~1432	138.78	89.66	117.07	40.72	53.01	46.82	111.65	166.81	137.17	513.67	320.25	407.72
ILL.bglP-BSU39270.2~1831	119.7	78.37	101.45	49.38	55.4	52.38	105.92	178.4	140.12	963.43	645.91	787.98
ILL.bglS-BSU39070.93~821	14.89	11.2	13.22	12.96	14.78	13.87	16.48	19.4	17.75	81.67	31.87	55.15
ILL.bhlA-BSU21420.1~213	0	0.98	0.44	0	0	0	0	0.44	0.21	0	0.91	0.46
ILL.bhlB-BSU21430.1~267	0.7	0.58	0.65	0.51	0	0.26	0	1.27	0.61	0.28	0.54	0.41
ILL.bioA-BSU30230.1~1347	0.85	0.86	0.86	1.44	1.59	1.51	0.43	0.68	0.54	0.9	1.3	1.09
ILL.bioB-BSU30200.1~1008	0.82	0.93	0.87	1.19	0.98	1.09	0.3	0.56	0.42	0.47	0.48	0.47
ILL.bioD-BSU30210.1~696	0.94	0.96	0.95	1.13	0.98	1.06	0.4	0.52	0.46	0.4	0.25	0.32
ILL.bioF-BSU30220.1~1170	0.66	0.82	0.73	1.33	1.23	1.28	0.44	0.85	0.64	0.65	1.15	0.9
ILL.bioI-BSU30190.69~1256	0.83	0.84	0.84	1.69	0.95	1.32	0.49	0.9	0.69	0.31	0.94	0.63
ILL.bioW-BSU30240.21~797	1.27	0.76	1.04	1.42	1.66	1.54	0.39	0.74	0.56	1.36	1.33	1.32
ILL.bioY-BSU10370.12~572	0.93	0.62	0.79	1.92	1.65	1.79	0.3	0.53	0.41	1.45	1.77	1.59
ILL.bioYB-BSU32030.6~608	12.94	13.32	13.14	18.62	15	16.83	9.69	11.96	10.57	37.49	22.15	29.18
ILL.bipA-BSU14770.10~1848	536.85	700.89	611.32	418.23	551.26	484.26	218.64	716.91	460.86	133.01	394.16	264.1
ILL.birA-BSU22440.1~978	66.61	62.01	64.69	67.14	60.15	63.71	51.7	73.08	61.49	16.33	44.99	30.69
ILL.bkdAA-BSU24050.22~1014	84.49	84.64	84.73	56.46	53.9	55.22	109.15	94.21	100.31	29.55	29.6	29.16
ILL.bkdAB-BSU24040.14~997	91.62	97.98	94.65	65.04	64.44	64.77	113.44	107.32	109.25	30.61	31.3	30.71
ILL.bkdB-BSU24030.1~1275	105.3	114.26	109.09	78.44	68.63	73.62	125.71	132.68	126.89	39.49	30.06	34.02
ILL.bkdR-BSU24100.50~2128	31.67	33.43	32.51	22.55	24.15	23.35	90.64	42.78	65.76	74.77	57.63	64.94
ILL.blt-BSU26590.10~1212	1.65	1.08	1.4	1.88	1.95	1.91	0.91	2.33	1.59	0.91	1.83	1.37
ILL.bltD-BSU26600.1~459	2.25	2.51	2.37	1.94	2.48	2.21	1.4	3.41	2.37	1.17	1.78	1.46
ILL.bltR-BSU26580.4~825	5.1	4.98	5.06	3.65	4.33	3.99	1.27	5.23	3.17	2.82	13.24	8.05
ILL.blyA-BSU21410.1~1104	0.03	0	0.02	0.03	0.04	0.04	0	0.03	0.02	0.04	0.11	0.07
ILL.bmr-BSU24010.1~1170	14.91	17.01	15.88	46.94	56.97	51.92	12.84	20.03	16.18	19.96	15.49	17.36
ILL.bmrA-BSU34820.53~1822	47.69	46.38	47.21	38.61	41.43	40.02	38.52	47.45	42.36	22.84	48.06	35.35
ILL.bmrR-BSU24020.4~840	7.75	6.68	7.29	22.55	22.8	22.68	4.63	7.3	5.83	14.59	9.33	11.66
ILL.bmrU-BSU24000.12~905	0.07	0.04	0.06	0.7	0.43	0.57	0.26	0.11	0.17	1.72	1.25	1.48
ILL.bofA-BSU00230.66~329	13.09	18.49	15.53	37.1	37.91	37.52	11.67	47.2	29.99	50.38	136.97	95.83
ILL.bofC-BSU27750.48~560	8.14	8.05	8.12	12.09	10.81	11.46	10.82	22.1	16.23	10.64	10.85	10.6
ILL.bpr-BSU15300.63~4364	1.51	1.69	1.59	3.56	4.3	3.93	1.3	2.09	1.67	5.99	20.58	13.34
ILL.braB-BSU29600.88~1425	56.05	63.18	59.35	34.18	42.48	38.31	12.92	46.27	29.14	19.46	47.54	33.47
ILL.brnQ-BSU26690.165~1487	12.52	13.24	12.87	29.24	32.27	30.76	5.69	12.08	8.75	3.82	11.68	7.77
ILL.bsaA-BSU21900.124~606	8.98	8.61	8.84	14.35	8.82	11.62	6.26	8.03	7.04	5.31	14.03	9.67
ILL.bscR-BSU27170.172~756	11.48	9.4	10.57	8.5	9.73	9.11	10.14	8.14	9.02	4.09	8.32	6.18
ILL.bsdD-BSU03651.1~228	6.61	6.2	6.44	6.15	5.92	6.04	2.67	7.26	4.83	1.57	4.97	3.26
ILL.bsn-BSU32540.14~880	8.45	8.89	8.66	14.13	11.96	13.06	12.84	13.17	12.8	12.78	4.76	8.53
ILL.BSU-misc-RNA-1-extra.1~213	1199.1	930.25	1082.31	1933.8	1025.47	1485.49	2244.34	818.37	1501.35	782.73	800.78	785.15
ILL.BSU-misc-RNA-10-extra.1~103	56.6	23.84	36.95	3.69	7.4	5.54	274.67	12.93	35.63	10.53	4.11	5.7
ILL.BSU-misc-RNA-11-extra.1~108	20.34	18.37	19.52	180.67	34.19	107.54	36.66	7.95	25.08	55.18	37.89	45.62
ILL.BSU-misc-RNA-12-extra.1~118	161.65	99.21	130.3	722.15	319.72	521.42	382.75	13.3	108.26	400.44	19.08	164
ILL.BSU-misc-RNA-13-extra.1~215	855.69	662.74	770.55	1215.58	843.12	1031.95	282.28	672.4	464.33	691.68	864.16	777.4
ILL.BSU-misc-RNA-14-extra.1~109	74.34	65.08	68.82	110.65	30.28	70.52	74.72	23.45	46.27	70.27	67.08	70.78
ILL.BSU-misc-RNA-15-extra.1~121	16.23	2.94	10.39	132.78	35.43	84.24	10.48	0	5	62.38	0	32.15
ILL.BSU-misc-RNA-16-extra.1~112	364.45	79.13	237.54	379.34	137.6	258.68	613.11	660.59	623.43	112.5	1030.62	538.5
ILL.BSU-misc-RNA-17-extra.1~211	992.57	687.21	859.08	3738.18	1718.98	2741.36	2231.35	826.91	1561.21	2857.41	1657.5	2233.7
ILL.BSU-misc-RNA-18-extra.1~156	266.26	295.27	274.83	9243.9	3468.65	6382.8	571.29	121.38	340.29	2087.59	357.94	1179.33
ILL.BSU-misc-RNA-19-extra.1~113	216.59	94.72	92.82	297.65	44.04	171.09	1280.59	94.8	276.87	520.26	41.77	127.5
ILL.BSU-misc-RNA-20-extra.1~157	327.27	212.03	275.93	4702.81	2594.45	3658.95	192.54	73.92	140.37	1751.39	641.09	1210.75
ILL.BSU-misc-RNA-21-extra.1~101	0	0	0	45.67	30.51	38.09	23.35	0	1.75	3.62	0	1.96
ILL.BSU-misc-RNA-22-extra.1~45	0	0	0	7.15	0	3.57	0	0	3.29	0	15.87	7.35
ILL.BSU-misc-RNA-23-extra.1~121	2.32	2.94	2.6	5.42	13.63	9.51	0	6.28	5	15.59	6.01	16.78
ILL.BSU-misc-RNA-24-extra.1~102	6.39	16.14	10.72	7.5	0	3.75	63.25	13.13	20.67	7.12	4.17	3.86
ILL.BSU-misc-RNA-25-extra.1~227	1163.43	1332.54	1239.17	2332.92	1854.86	2097.56	835.97	1490.48	1168.14	1188.75	1227.06	1217.03
ILL.BSU-misc-RNA-26-extra.1~117	381.51	429.22	340.71	189.7	85.05	137.49	862.37	203.33	375.04	424.3	356.38	329.46
ILL.BSU-misc-RNA-27-extra.1~118	210.64	257.32	224.94	68.78	31.68	50.27	181.42	73.16	113.54	63.08	92.24	124.11
ILL.BSU-misc-RNA-28-extra.1~115	508.87	310.53	397.75	30.25	100.27	65.18	335.67	59.78	307.81	26.01	161.25	135.62
ILL.BSU-misc-RNA-29-extra.1~106	21	18.97	20.15	38.73	24.72	31.73	45.95	0	29.14	16.75	15.66	19.93
ILL.BSU-misc-RNA-3-extra.1~141	6702.53	8638.95	7567.99	3781.18	4118.72	3949.56	4526.72	7732.14	5955.07	1330.75	3029.3	2140.2
ILL.BSU-misc-RNA-30-extra.1~42	0	7.87	3.49	7.33	0	3.66	22.75	17	13.47	62.85	56.91	64.05
ILL.BSU-misc-RNA-31-extra.1~92	0	0	0	0	0	0	0	0	0	0	4.82	4.45
ILL.BSU-misc-RNA-32-extra.1~187	19941.4	8996.48	15132	29382.9	6549.7	18105	136249	17068.9	81592.8	64270.1	15203.6	39861
ILL.BSU-misc-RNA-34-extra.1~101	3.24	8.19	5.44	0	0	0	2.92	4.45	1.75	0	4.23	1.96
ILL.BSU-misc-RNA-36-extra.1~145	1563.81	722.92	1180.97	1165.04	624.1	896.53	2820	924.84	1990.65	1080.67	583.14	848.63
ILL.BSU-misc-RNA-37-extra.1~98	44.04	25.68	36.01	35.82	15.94	25.88	88.47	18.6	54.85	49.12	8.85	28.65
ILL.BSU-misc-RNA-38-extra.1~102	22.35	32.28	26.8	41.24	30.05	35.65	23	21.89	18.95	42.75	8.34	27
ILL.BSU-misc-RNA-39-extra.1~175	2333.92	1564.87	1999.05	3609.93	2951.16	3285.62	947.59	1958.97	1399.71	1813.37	3198.58	2484.46
ILL.BSU-misc-RNA-4-extra.1~57	5.48	0	3.06	6.43	0	3.21	9.93	14.97	8.86	0	0	0
ILL.BSU-misc-RNA-40-extra.1~208	697.42	468.01	595.18	692.12	321.71	509.26	1429.42	671.47	1011.95	565.1	426.05	482.11
ILL.BSU-misc-RNA-41-extra.1~193	7542.01	1853.45	5033.93	19332.7	5998.32	12748.1	15921	3325.81	10000.8	10909.3	3865.47	7331.02
ILL.BSU-misc-RNA-42-extra.1~233	1327.71	1263.16	1302	2096.53	1696.77	1899.77	1101.31	1613.98	1336.49	1127.63	1949.67	1528.94
ILL.BSU-misc-RNA-43-extra.1~76	90	136.13	108.14	47.59	37	42.28	44.66	98.79	72.81	70.19	94.06	84.2
ILL.BSU-misc-RNA-44-extra.1~223	1388.98	851.89	1153.1	1809.9	864.87	1343.32	1611.21	1042.21	1340.07	1674.89	1180.57	1411.28
ILL.BSU-misc-RNA-45-extra.1~247	31.37	41.93	36.15	1669.57	789.09	1234.77	13.98	8.09	11.17	25.85	31.34	28.49
ILL.BSU-misc-RNA-46-extra.1~180	1352.88	816.71	1118.55	1902.29	1189.07	1550.39	1821.14	1203.28	1534.74	794.65	852.51	820.49
ILL.BSU-misc-RNA-47-extra.1~131	950.42	723.07	814.84	663.73	427.63	546.22	1902.94	778.93	940.15	1618.22	1028.4	1183.73
ILL.BSU-misc-RNA-48-extra.1~248	506.83	423.79	450.77	383.54	278.25	331.63	381.09	524.11	431.5	205.37	523.65	360.47
ILL.BSU-misc-RNA-49-extra.1~215	1772.71	1132.41	1490.25	1951.08	884.01	1424.26	2704.72	1405.46	2065.35	2714.06	1419.78	2038.79
ILL.BSU-misc-RNA-5-extra.1~171	707.66	585.39	642.88	706.32	557.56	633	840.9	696.15	719.76	7756.77	540.12	3697.4
ILL.BSU-misc-RNA-50-extra.1~139	3881.34	3506.22	3719.94	1512.42	1100.74	1307.9	5175.51	5188.61	4881.53	1552.12	2124.8	1825.24
ILL.BSU-misc-RNA-51-extra.1~102	0	16.14	7.15	22.49	7.51	15.01	54.63	0	1.72	14.25	12.51	11.57
ILL.BSU-misc-RNA-52-extra.1~149	650.95	436.28	554.08	193.01	152.16	172.77	290.42	261.02	267.04	140.14	258.47	196.33
ILL.BSU-misc-RNA-53-extra.1~107	64.97	29.87	42.98	24.25	24.33	24.29	226.15	44.46	108.34	224.25	57.78	130.18
ILL.BSU-misc-RNA-54-extra.1~180	471.89	298.35	395.76	503.74	357.7	431.74	271.73	487.75	368.45	387.67	991.3	681.61
ILL.BSU-misc-RNA-56-extra.1~236	122.51	156.18	137.79	512.46	388.39	451.33	18.82	73.33	44.62	118.37	111.07	113.64
ILL.BSU-misc-RNA-57-extra.1~222	25.06	37.79	30.07	0	8.53	3.62	18.35	46.4	30.67	0	53.46	26.27
ILL.BSU-misc-RNA-58-extra.1~222	166.63	153.54	161.91	44.88	50.42	48.24	63.38	228.92	141.75	31.38	172.24	101.91
ILL.BSU-misc-RNA-59-extra.1~207	26.35	35.72	30.58	38.8	45.44	42.1	20.79	42.6	31.12	21.1	28.74	24.72
ILL.BSU-misc-RNA-6-extra.1~248	178.13	207.46	191.6	201.9	176.57	189.46	96.73	205.19	148.66	131.4	210.84	173.22
ILL.BSU-misc-RNA-60-extra.1~103	820.68	302.03	592.96	1856.83	347.8	1103.03	1078.86	556.01	863.6	263.17	353.03	305.75
ILL.BSU-misc-RNA-61-extra.1~107	2.95	3.73	3.31	69.3	24.33	46.84	7.98	0	1.59	13.19	3.85	7.13
ILL.BSU-misc-RNA-62-extra.1~107	0	7.47	3.31	34.65	10.43	22.55	2.66	0	1.59	0	0	0
ILL.BSU-misc-RNA-63-extra.1~103	34.59	23.84	29.91	0	3.7	1.85	8.49	21.55	11.88	7.02	24.63	15.19
ILL.BSU-misc-RNA-7-extra.1~144	4073.09	2055.98	3190.89	1343.89	881.61	1114.44	1062.55	1152.42	1118.38	859.25	921.28	889.7
ILL.BSU-misc-RNA-8-extra.1~101	375.98	208.88	275.66	64.71	41.95	53.33	563.29	195.61	328.81	72.32	131.22	103.76
ILL.BSU-misc-RNA-9-extra.1~103	31.44	39.74	35.19	25.84	18.5	22.17	42.47	47.41	39.02	0	0	0
ILL.buk-BSU24070.4~1095	58.78	56.91	58	40.14	37.59	38.9	98.36	62.08	79.04	51	42.74	46.07
ILL.cah-BSU03180.1~957	27.36	23.98	25.76	37.75	30.99	34.42	12.82	14.6	13.73	8.65	11.36	9.91
ILL.carA-BSU11230.1~1062	0.27	0.25	0.26	0.36	0.44	0.4	0.11	0.11	0.1	0.04	0.11	0.08
ILL.carB-BSU11240.1~3093	0.54	0.68	0.6	0.92	0.81	0.87	0.46	0.49	0.46	0.27	0.23	0.24
ILL.carB-BSU15520.1~3216	102.79	106.19	104.52	43.58	60.42	51.94	363.32	57.49	207.34	3.51	17.93	10.8
ILL.catD-BSU08230.21~425	18.41	19.11	18.71	16.43	15.89	16.17	9.75	26.97	18.28	19.88	51.26	36.28
ILL.catE-BSU08240.1~858	17.59	24.82	20.86	20.11	19.97	20.05	18.95	37.82	27.9	27.89	62.77	45.24
ILL.cbiO-BSU01450.128~973	78.39	104.14	90.07	237.64	383.26	309.82	106.58	282.24	191.2	29.51	82.8	56.16
ILL.cbiO-BSU01460.15~845	86.75	102.16	93.82	239.19	430.03	333.75	111.01	329.79	216.2	23.28	88.8	56.27
ILL.cca-BSU22450.5~1198	63.11	64.03	63.65	68.35	50.42	59.5	53.36	67.51	59.58	19.8	47.32	33.54
ILL.cccA-BSU25190.32~394	22.55	25.12	23.74	46.64	46.47	46.58	131.88	72.78	101.56	118.72	80.07	97.62
ILL.cccB-BSU35270.8~346	249.87	287.2	266.85	243.77	260.7	252.26	277.91	334.96	314.05	234.72	261.63	245.57
ILL.ccdA-BSU17930.86~793	10.34	13.73	11.88	41.73	59.07	50.33	64.21	206.62	133.21	45.75	160.66	103.56
ILL.ccpA-BSU29740.151~1155	229.77	294.02	258.98	203.51	245.62	224.44	207.25	339.77	269.58	141.24	346.97	243.91
ILL.ccpB-BSU40870.44~979	2.95	3.83	3.33	6.54	8.02	7.28	4.56	22.93	13.5	10.91	101.27	56.7
ILL.ccpC-BSU14140.25~906	88.59	93.98	91.18	110.46	88.31	99.54	150.91	236.75	192.1	155.84	230.07	191.37
ILL.ccpN-BSU25250.133~771	108.72	112.03	110.4	139.15	139.94	139.6	59.23	125.02	91.08	113.79	520.98	320.14
ILL.cdd-BSU25300.1~411	158.6	209.92	181.86	481.31	521.56	501.44	192.73	255.07	220.71	315.04	315.07	310.93
ILL.cdoA-BSU31140.338~823	0.98	0.78	0.89	0.68	0.35	0.51	0.08	0.17	0.12	0.47	1.59	1.03
ILL.cdsA-BSU16540.1~810	109.42	127.85	117.87	305.43	324.89	315.2	152.21	313.9	233.28	105.8	370.72	240.77
ILL.cgeA-BSU19780.15~416	0.22	0.14	0.18	0.48	0.49	0.48	0.11	0.59	0.34	0	1.5	0.76
ILL.cgeB-BSU19790.7~960	0.49	1.08	0.75	2.24	2.08	2.16	0.39	0.4	0.39	0.59	1.45	1.02
ILL.cgeC-BSU19770.1~306	0	0.23	0.1	0.2	0.8	0.5	0	0	0	0.22	2.48	1.36
ILL.cgeD-BSU19760.1~1281	1.85	3.31	2.5	33.3	48.62	40.9	0.37	0.89	0.62	0.1	0.77	0.44
ILL.cgeE-BSU19750.4~783	5.43	8.17	6.61	65.64	96.39	80.89	1.65	1.87	1.74	1.1	1.36	1.21
ILL.cggR-BSU33950.100~1122	300.79	405.82	348.39	213.4	147.06	180.65	147.2	505.58	322.49	20.03	74.52	47.49
ILL.cheA-BSU16430.1~2019	81.22	81.28	81.4	469.71	476.84	473.44	22.34	31.17	26.39	1.75	3.15	2.44
ILL.cheB-BSU16420.2~1075	83.9	78.73	81.76	428.61	435.18	432.05	19.71	29.61	24.26	2.1	2.97	2.51
ILL.cheC-BSU16450.10~639	90.13	91.29	90.84	540.66	593.82	567.21	29	34.94	31.99	4	4.25	4.07
ILL.cheD-BSU16460.1~501	95.59	102.62	98.93	574.77	658.08	616.26	34.39	40.47	37.03	4.32	5.35	4.79
ILL.cheR-BSU22720.25~795	22.67	24.39	23.49	150.47	148.11	149.37	25.82	43.17	34.35	141.33	193.26	165.78
ILL.cheV-BSU14010.162~1073	54.86	88.42	69.98	376.95	432.99	404.85	16.91	27.62	21.94	2.21	3.37	2.77
ILL.cheW-BSU16440.22~492	108.88	125.87	116.37	678.7	807.46	742.73	35.64	45.44	40.48	5.7	7.21	6.39
ILL.cheY-BSU16330.26~388	202.26	203.26	194.21	694.26	833.09	763.27	62.67	90.6	76.17	10.63	17.27	13.93
ILL.cimH-BSU38770.19~1371	1.33	2.43	1.82	24.18	20.91	22.57	3.86	0.66	2.2	19.98	2.88	10.96
ILL.cinA-BSU16930.1~1251	119.41	129.52	124.14	367.86	415.98	391.84	100.3	158.82	128.79	130.09	201.07	164.97
ILL.citA-BSU09440.12~1112	14.58	16.47	15.44	17.53	15.82	16.69	13.14	19.06	15.75	16.29	31.24	23.58
ILL.citB-BSU18000.43~2772	179.3	252.32	212.33	1002.57	1417.96	1208.62	224.02	112.29	165.67	157.06	91.57	121.44
ILL.citH-BSU39060.1~1281	1.01	1.21	1.1	0.88	1.08	0.98	0.57	0.8	0.67	1.18	2.33	1.75
ILL.citM-BSU07610.40~1341	5.12	6.28	5.65	5.35	7.43	6.38	10.3	9.39	9.71	9.44	6.61	7.86
ILL.citR-BSU09430.36~911	11.86	10.83	11.42	14.74	10.63	12.72	9.54	10.65	10.05	20.04	17.81	18.51
ILL.citS-BSU07580.4~1632	6.39	7.85	7.06	31.98	34.86	33.42	7.93	6.3	6.99	9.01	10.41	9.59
ILL.citT-BSU07590.1~681	7.84	9.38	8.54	32.52	33.78	33.16	6.75	5.69	6.17	8.79	8.4	8.5
ILL.citZ-BSU29140.186~1304	269.64	300.21	283.87	516.91	611.97	564.19	279.04	163.55	217.86	248.16	173.24	206.39
ILL.clpC-BSU00860.1~2433	110.96	100.16	106.31	114.65	118.52	116.61	95.19	253.87	171.57	143.15	576.01	361.47
ILL.clpE-BSU13700.33~2132	11.69	12.35	12.01	32.83	42.82	37.79	6.13	6.47	6.23	4.22	3.57	3.83
ILL.clpP-BSU34540.42~635	621.04	694.44	654.94	515.6	486.62	501.48	417.5	524.6	464.12	181.38	145.09	160.38
ILL.clpQ-BSU16150.1~546	236.05	281.92	257.05	358.76	417.08	387.78	173.39	335.57	250.82	76.58	252.59	164.94
ILL.clpX-BSU28220.1~1263	595.17	741.51	661.86	880.59	745.22	813.97	590.46	1066.88	816.25	561.77	790.31	670.06
ILL.clsA-BSU36590.243~1691	38.05	43.8	40.7	39.33	49.03	44.15	44.36	69.15	55.92	18.36	36.58	27.37
ILL.clsB-BSU37190.1~1197	0.44	0.22	0.34	0.41	0.42	0.42	0.09	0.22	0.15	0.25	0.33	0.29
ILL.cmk-BSU22890.1~675	197.89	242.99	218.46	181.44	199.48	190.45	120.16	221.96	169.39	44.89	113.77	79.5
ILL.coaA-BSU23760.1~960	32.28	33.59	32.93	50.94	48.24	49.62	27.8	35.24	31.07	14.47	16.05	15.07
ILL.coaBC-BSU15700.78~1298	31.73	33.07	32.39	189.32	196.04	192.73	43.86	80.24	61.18	100.99	154.28	126.8
ILL.coaD-BSU15020.5~490	142.79	156.74	148.94	176.47	198.16	187.28	81.63	178.99	127.93	108.41	238.86	173.24
ILL.coaE-BSU29060.16~609	65.93	69.09	66.59	84.93	84.27	84.64	51.35	77.87	63.08	29.59	37.1	33
ILL.coaX-BSU00700.195~971	112.97	106.97	110.52	88.32	112.45	100.3	84.73	159.54	120.32	42.16	412.12	230.22
ILL.codY-BSU16170.1~780	277.52	339.85	305.5	444.65	496.78	470.64	233.2	401.08	314.43	79.82	227.18	154.02
ILL.coiA-BSU11530.57~1178	0.72	0.92	0.81	1.05	0.88	0.97	1.29	2.35	1.79	1.07	8.44	4.81
ILL.comA-BSU31680.3~647	121.73	127.44	124.4	135.94	108.93	122.63	101.98	172.8	133.78	243.89	341.24	288.66
ILL.comC-BSU28070.21~767	1.06	1.07	1.06	0.78	1.38	1.07	0.85	3.94	2.36	0.29	3.14	1.73
ILL.comEA-BSU25590.1~618	0.26	0.48	0.36	0.49	1.92	1.2	0.74	5.31	3	0.7	13.54	7.25
ILL.comEB-BSU25580.10~579	30.47	38.45	34.03	39.84	39.14	39.51	29.08	33.33	30.7	15.13	43.24	29.27
ILL.comEC-BSU25570.4~2334	2.4	2.55	2.46	5.74	5.14	5.44	1.38	4.25	2.74	2.21	7.63	4.97
ILL.comER-BSU25600.84~905	0.61	0.35	0.49	0.57	0.62	0.6	0.17	0.21	0.19	0.63	0.59	0.6
ILL.comFA-BSU35470.7~1398	2.64	3.49	3.03	8.62	7.34	7.99	2.01	8.14	5.01	7.95	18.31	13.14
ILL.comFB-BSU35460.60~356	13.33	19.2	15.98	30.89	24.26	27.62	10.42	18.88	14.33	15.44	14.04	14.45
ILL.comFC-BSU35450.1~690	18.74	18.34	18.51	31.7	31.71	31.72	9.46	22.42	15.69	17.8	20.08	18.8
ILL.comGA-BSU24730.2~1072	0.32	0.51	0.4	0.68	0.59	0.64	0.46	0.26	0.36	0.19	0.92	0.56
ILL.comGB-BSU24720.1~972	0.37	0.23	0.31	0.32	0.36	0.34	0.11	0.15	0.13	0.04	0.7	0.38
ILL.comGC-BSU24710.1~297	0.76	0.95	0.85	1.04	0.21	0.63	0.2	1.23	0.69	0.46	1.53	0.99
ILL.comGD-BSU24700.1~432	0.21	0.26	0.23	0.68	0.93	0.8	0.22	0.33	0.27	0	0.95	0.48
ILL.comGE-BSU24690.1~348	0.73	0.36	0.57	0.63	0.65	0.64	0.15	0.31	0.3	0.17	1.32	0.75
ILL.comGF-BSU24680.26~409	0.57	0.85	0.69	1.1	0.75	0.93	0.23	1.45	0.82	0.27	1.41	0.85
ILL.comGG-BSU24670.1~375	2.09	3.36	2.66	1.33	2.44	1.88	0.51	1.96	1.27	0.59	2.23	1.41
ILL.comK-BSU10420.20~598	17.4	19.69	18.46	36.82	38.65	37.74	3.01	7.38	5.11	2.26	2.35	2.28
ILL.comN-BSU27660.1~297	188.4	223.91	204.57	189.03	193.15	191.15	176.68	245.05	208.05	123.52	175.7	148.27
ILL.comP-BSU31690.1~2310	87.5	90.49	89.02	81.83	94.71	88.24	33.66	76.3	54.17	68.35	108.77	87.94
ILL.comQ-BSU31710.106~1005	42.11	32.87	38.06	33.39	36.43	34.91	15.6	28.52	21.74	61.98	65.22	62.75
ILL.comS-BSU03500.1~141	0	0	0	0	0	0	0	0	0	0	0	0
ILL.comX-BSU31700.1~168	155.21	147.52	151.47	94.84	152.74	123.53	30.38	81.55	71	233.67	215.77	235.75
ILL.comZ-BSU11310.15~206	313.27	352.95	331.18	244.62	218.25	231.7	280.29	434.22	349.13	430.68	530.71	476.04
ILL.copA-BSU33500.84~2492	18.63	23.39	20.8	21.55	26.87	24.19	18.72	25.28	21.69	19.87	18.61	18.94
ILL.copB-BSU33490.70~2169	20.88	20.37	20.68	26.09	33.45	29.75	33.34	26.98	29.76	17.41	10.89	13.88
ILL.copZ-BSU33510.13~222	64.6	72.02	68.06	59.19	56.98	58.13	156.01	79.33	96.52	99.6	45.79	70.85
ILL.cotA-BSU06300.152~1693	0.46	0.37	0.42	1.96	1.54	1.75	0.08	0.46	0.27	0.62	2.18	1.4
ILL.cotB-BSU36050.1~1143	1.89	2.03	1.96	0.77	0.37	0.57	0.45	1.04	0.73	0.63	2.3	1.47
ILL.cotC-BSU17700.175~375	6.48	7.22	6.76	24.92	43.87	34.31	4.39	28.74	16.89	31.16	39.15	35.7
ILL.cotD-BSU22200.11~238	664.7	649.35	655.41	484.72	558.14	521.26	346.52	576.96	466.84	219.18	518.67	372.92
ILL.cotE-BSU17030.26~571	2.19	2.04	2.13	2.31	3.57	2.93	1.09	1.91	1.47	1.18	7.42	4.34
ILL.cotF-BSU40530.26~508	0.85	0.77	0.82	0.5	0.68	0.59	0.56	0.9	0.72	0.09	1.14	0.62
ILL.cotG-BSU36070.141~728	0	0	0	0	0	0	0	0.11	0.05	0.19	0.41	0.3
ILL.cotH-BSU36060.1~1089	0.62	0.41	0.53	0.42	0.43	0.43	0.41	0.34	0.37	0.31	0.55	0.43
ILL.cotI-BSU30920.1~1074	0.3	0.25	0.28	0.04	0.18	0.11	0.14	0.1	0.12	0.16	0.22	0.15
ILL.cotJA-BSU06890.1~249	0.54	0.34	0.45	0.59	0	0.3	0.82	1.18	0.99	0	0.31	0.16
ILL.cotJB-BSU06900.1~264	0.48	0.3	0.4	0.26	0.53	0.4	0.24	0.78	0.5	0.29	0.27	0.28
ILL.cotJC-BSU06910.1~570	0.36	0.98	0.64	0.23	0.39	0.31	0.74	0.98	0.85	0.09	1.05	0.57
ILL.cotM-BSU17970.42~434	0.78	0.84	0.81	1.16	0.64	0.9	0.2	1.65	0.9	1.4	1.98	1.67
ILL.cotO-BSU11730.18~701	3.45	5.59	4.38	2.86	8.83	5.82	19.35	83.78	51.3	51.18	257.5	156.06
ILL.cotP-BSU05550.1~432	0.21	0.26	0.23	0	0.12	0.06	0.22	0.33	0.27	0	1.9	0.96
ILL.cotR-BSU34530.305~1267	1.14	1.31	1.22	0.62	0.58	0.6	0.16	0.83	0.49	0.34	1.34	0.85
ILL.cotS-BSU30900.1~1056	1.01	0.71	0.88	1.1	1.12	1.11	0.81	2.35	1.56	1.46	47.65	25.01
ILL.cotSA-BSU30910.1~1134	0.75	0.54	0.66	0.74	0.69	0.71	0.42	2.82	1.6	1.12	47.37	24.67
ILL.cotT-BSU12090.28~351	0.56	0	0.31	0.3	0	0.15	0.29	0.75	0.51	0.34	0.8	0.57
ILL.cotU-BSU17670.192~452	0.83	1.36	1.07	0.11	0.92	0.51	0.11	0.88	0.48	0.75	1.41	1.07
ILL.cotV-BSU11780.1~387	0.32	0.13	0.24	0.46	0.47	0.47	0.55	0.45	0.39	0.51	2.05	1.34
ILL.cotW-BSU11770.1~318	0.34	0.84	0.56	1.1	0.75	0.93	0	0.36	0.18	0.81	2.7	1.75
ILL.cotX-BSU11760.99~617	0.45	0.56	0.5	0.35	0.78	0.56	0.13	0.68	0.4	0.77	2.63	1.7
ILL.cotY-BSU11750.1~489	0	0.22	0.1	0.47	0	0.24	0.27	0.19	0.23	0.42	0.99	0.71
ILL.cotZ-BSU11740.1~447	0.2	0.12	0.17	0.75	0.22	0.49	0	0.32	0.15	0.6	1.47	1.03
ILL.coxA-BSU27830.148~744	0.82	1.33	1.05	3.31	4.67	3.98	1.49	2.48	1.95	1.29	7.03	4.19
ILL.crcBA-BSU09600.1~357	40.79	45.81	43.12	62.69	64.92	63.82	24.81	41.67	32.5	21.64	38.1	29.77
ILL.crh-BSU34740.24~281	243.67	297.72	266.55	723.08	1494.05	1104.86	162.26	325.94	247.37	404.92	2278.3	1358.14
ILL.csaA-BSU19040.1~333	14.65	18.81	16.53	57.23	40.18	48.82	15.25	13.2	14.07	17.14	9.48	13.05
ILL.csbA-BSU35180.68~298	61.34	55.71	58.96	41.62	52.07	46.81	42.87	67	54.14	35.35	31.9	33.16
ILL.csbB-BSU08600.1~990	59.81	66.13	62.7	46.02	55.01	50.49	32.05	37.94	34.46	8.73	36.21	22.58
ILL.csbC-BSU39810.18~1403	0.57	1.16	0.83	2.36	1.71	2.04	2.88	4.62	3.7	7.86	9	8.32
ILL.csbD-BSU36670.14~202	0.73	0.92	0.81	2.8	2.87	2.84	3.31	2.82	3.05	44.59	18.64	31.81
ILL.csbX-BSU27760.6~1313	16.53	14.47	15.65	17.15	18.48	17.82	32.82	35.88	33.84	31.09	18.17	24.08
ILL.csfB-BSU00240.130~324	30.81	59.79	43.54	30.08	62.38	46.07	10.62	347.69	184.08	54.24	419.05	246.01
ILL.csgA-BSU02070.112~360	0.55	0	0.31	1.94	2.29	2.12	0.85	1.91	1.36	1.98	3.29	2.62
ILL.cshA-BSU04580.1~1536	476.78	619.9	541.4	524.78	652.67	588.31	390.83	817.85	595.96	238.38	449.81	342.76
ILL.cshB-BSU25140.29~1345	112.84	163.12	135.56	118.98	147.51	133.15	102.83	203.91	151.08	57.05	179.98	118.79
ILL.csn-BSU26890.12~845	10.53	12.63	11.49	12.45	14.07	13.26	5.49	9.19	7.23	5.32	4.8	4.98
ILL.csoR-BSU33520.10~315	35.04	35.52	35.33	31.8	39.39	35.57	36.07	45.53	41.17	25.32	24.92	25.91
ILL.cspB-BSU09100.69~272	11872.6	17352	14247.5	7071.25	8217.39	7641.57	12121.2	17185	14601	2377.06	6577.51	4603.63
ILL.cspC-BSU05120.89~289	1799.91	3059.51	2365.19	1416.09	1543.72	1479.88	1548.49	3814.18	2633.7	844.87	1293.04	1064.16
ILL.cspD-BSU21930.26~226	6008.76	7610.38	6719.62	14641.7	13249	13959.6	5557.05	8016.27	6614.71	9261.44	5987.45	7491.05
ILL.cspR-BSU08930.1~483	228.62	258.73	242.56	230.54	251.6	241.06	203.79	480.03	334.98	556.92	1637.95	1097.36
ILL.csrA-BSU35370.1~225	67.26	81.17	73.04	838.44	977.55	907.64	64.02	79.6	69.81	40.9	52.94	46.52
ILL.cssR-BSU33010.11~688	18.29	15.16	16.93	26.63	21.86	24.28	14.14	12.29	13.18	29.59	12.39	20.47
ILL.cssS-BSU33020.1~1356	22.44	19.44	21.14	25.75	28.76	27.25	13.11	18.21	15.31	22.39	13.65	17.57
ILL.cstA-BSU28710.9~1805	41.48	31.44	37.04	26.98	28.88	27.93	59.27	52.68	55.16	58.26	17.88	36.85
ILL.ctaA-BSU14870.355~1275	25.63	50.42	36.77	23.11	26.92	25	27.87	38.73	32.81	34.78	34.04	33.9
ILL.ctaB-BSU14880.1~918	172.77	298.05	229.15	330.33	322.6	326.65	201.43	334.23	264.2	137.15	225.42	180.11
ILL.ctaC-BSU14890.224~1294	8.15	10.81	9.35	63.96	68.22	66.1	11.9	15.37	13.43	37.97	16.69	26.58
ILL.ctaD-BSU14900.33~1901	9.78	13.16	11.31	77.46	86.37	81.9	16.54	16.86	16.51	35.8	16.07	25.31
ILL.ctaE-BSU14910.1~624	13.62	16.21	14.81	94.64	108.97	101.78	17.29	20.08	18.42	32.62	14.03	22.76
ILL.ctaF-BSU14920.1~333	10.94	19.64	14.84	82.58	97.87	90.19	16.72	23.5	19.88	30.8	13.85	21.75
ILL.ctaG-BSU14930.1~894	5.91	8.96	7.29	66.4	81.7	74	8.95	14.47	11.52	24.99	10.36	17.2
ILL.ctaO-BSU12080.118~1107	1.53	2.81	2.11	2.28	2.9	2.59	1.31	2.48	1.87	0.48	1.48	0.98
ILL.ctc-BSU00520.18~632	640.61	689.06	663.51	347.55	375.83	361.69	395.48	498.5	440.66	451.56	390.25	414.2
ILL.ctpA-BSU19590.12~1412	102.21	144.72	121.42	142.88	169.37	156.05	110.56	164.79	135.58	99.06	171.19	134.34
ILL.ctpB-BSU35240.140~1582	1.36	1.81	1.56	2.78	4.34	3.55	1.76	11.43	6.48	16.08	140.63	79.31
ILL.ctrA-BSU09460.120~1517	0.33	0.69	0.49	48.97	33.67	41.42	0.19	0.02	0.1	0.67	0.32	0.48
ILL.ctsR-BSU00830.134~598	54.62	47.56	51.58	44.74	51.33	48.02	25.87	146.48	85.15	26.44	221.41	125.25
ILL.cueR-BSU09560.8~439	123.62	147.97	134.77	401.93	382.84	392.66	99.62	168.93	132.35	214.15	129.7	168.62
ILL.cwlA-BSU25900.1~819	0.59	0.9	0.73	0.74	0.8	0.77	0.81	1.34	1.06	13.39	52.33	33
ILL.cwlC-BSU17410.1~768	4.7	6.49	5.51	6.48	6.3	6.4	2.22	5	3.55	5.76	6.34	5.92
ILL.cwlD-BSU01530.60~773	2.44	1.94	2.22	7.06	5.44	6.26	2.44	5.04	3.68	9.55	68.39	39.33
ILL.cwlH-BSU25710.45~797	0.17	0.13	0.15	0.22	0.34	0.28	0.32	0.47	0.39	0.2	1.23	0.72
ILL.cwlJ-BSU02600.314~742	2.46	3.05	2.73	4.72	3.49	4.11	1.94	3.92	2.88	1.81	8.95	5.44
ILL.cwlK-BSU02810.60~563	7.48	8.57	7.99	6.21	7.38	6.79	7.03	9.53	8.27	4.71	6.74	5.71
ILL.cwlO-BSU34800.178~1599	718.11	888.48	795.77	863.21	1003.67	933.11	379.24	1118.74	737.76	848.58	1091.09	959.91
ILL.cwlS-BSU19410.274~1518	14.63	17.41	15.9	69.33	64.02	66.73	9.03	9.4	9.08	3.17	5.71	4.42
ILL.cycB-BSU34160.25~1290	12.45	8.06	10.51	11.4	11.47	11.44	36.2	25.06	30.29	40	11.82	24.85
ILL.cydA-BSU38760.182~1588	0.56	0.48	0.52	0.51	0.5	0.5	2.42	0.97	1.68	0.26	0.72	0.49
ILL.cydB-BSU38750.1~1017	1.09	1.05	1.08	1.26	1.48	1.37	8.71	1.04	4.82	0.42	0.56	0.49
ILL.cydC-BSU38740.1~1704	1.13	1.36	1.23	2.1	1.97	2.04	10.59	1.25	5.84	0.57	0.87	0.74
ILL.cydD-BSU38730.1~1728	1.72	2.45	2.05	1.73	2.95	2.34	15.77	2.03	8.78	0.61	1.43	1.02
ILL.cyeA-BSU18770.1~879	2.51	2.69	2.6	4.64	4.99	4.81	2.58	4.64	3.56	2.47	6.22	4.36
ILL.cyeB-BSU34000.18~935	7.9	7	7.52	9.41	8.5	8.96	8.29	9.67	8.91	6.22	8.03	7.05
ILL.cymR-BSU27520.71~487	97.96	134.33	114.42	79.98	109.91	94.83	132.56	168.47	148.36	100.22	275.16	187.4
ILL.cypA-BSU26740.1~1233	1.73	3.38	2.46	20.67	20.76	20.72	1.96	4.59	3.26	4.13	8.47	6.28
ILL.cypB-BSU27160.16~3180	12.41	10.64	11.65	9.85	11.8	10.82	9.35	8.64	8.77	3.3	6.7	4.97
ILL.cypC-BSU02100.90~1343	0.79	1.01	0.89	1.27	1.13	1.2	1.23	0.91	1.07	4.24	3.31	3.72
ILL.cypX-BSU35060.1~1218	8.34	12.06	10.01	11.21	11.73	11.47	8.33	10.25	9.13	3.32	8.72	6.04
ILL.cysC-BSU15600.1~594	30.84	19.86	25.99	302.34	363.19	332.58	15.02	9.74	12.24	2.93	18.54	10.81
ILL.cysE-BSU00930.125~778	50.26	41.34	46.38	70.91	64.78	67.9	31.11	40.47	35.27	17.27	62.39	39.96
ILL.cysH-BSU15570.162~863	36.62	38.06	37.34	335.31	417.61	376.19	37.83	19.86	28.48	53.27	53.04	52.41
ILL.cysJ-BSU33440.32~1849	16.47	16.52	16.52	87.89	89.19	88.57	33.28	12.12	22.33	37.8	124.14	81.19
ILL.cysK-BSU00730.1~927	339.08	260.09	304.46	477.38	447.2	462.65	187.16	244.67	213.37	166.73	680.38	426.45
ILL.cysL-BSU37650.6~905	27.42	23.44	25.7	31.74	28.54	30.17	25.97	37.09	31.05	19.14	39.09	29.01
ILL.cysP-BSU15580.5~1069	21.98	19.99	21.12	220.16	274.08	246.94	21.26	9.86	15.27	20.2	24.24	21.91
ILL.cysS-BSU00940.1~1401	55.76	55.48	55.56	93.61	88.97	91.36	34.95	46.49	39.95	21.24	59.6	40.43
ILL.czcD-BSU26650.15~950	2.48	3.08	2.76	6.27	7.25	6.76	2.47	2.25	2.33	1.56	1.38	1.45
ILL.czrA-BSU19120.12~335	38.78	40.07	39.35	74.42	70.72	72.62	40.13	61.64	51.56	65.7	93.04	78.7
ILL.dacA-BSU00100.61~1392	285.51	338.65	309.84	182.13	214.74	198.35	195.5	406.66	296.14	184.29	418.74	300.95
ILL.dacB-BSU23190.123~1271	2.85	3.61	3.2	2.72	5.14	3.92	6.23	15.57	10.71	1.32	29.44	15.63
ILL.dacC-BSU18350.33~1508	2.78	3.83	3.26	10.32	6.91	8.64	2.9	3.2	3.02	2.55	8.39	5.5
ILL.dacF-BSU23480.1~1170	0.12	0.11	0.12	0.45	0.66	0.56	0.91	2.18	1.52	0.58	6.24	3.45
ILL.dapA-BSU16770.1~873	300.8	331.54	314.57	677.72	748.89	713.24	260.75	325.45	287.01	214.92	517.26	365.29
ILL.dapB-BSU22490.12~815	66.99	63.36	65.41	59.83	53.32	56.64	46.49	60.69	53.07	30.96	67.82	49.27
ILL.dapF-BSU32170.20~874	107.01	106.48	107	265.39	221.35	243.71	64.11	130.84	95.94	41.17	130.06	85.82
ILL.dapG-BSU16760.92~1306	201	229.1	213.98	518.64	553.34	536.04	171.67	217.63	191.86	146.3	415.73	281.26
ILL.dapH-BSU14180.21~731	415.58	548.19	475.74	510.5	471.41	491.38	281.6	385.64	328.98	302.47	222.95	257.82
ILL.dapL-BSU14190.70~1194	48.72	62.74	55.09	284.03	297.56	290.85	62.44	103.18	81.75	86.87	123.29	104.4
ILL.dat-BSU09670.1~849	39.57	42.42	40.87	198.31	182.6	190.62	33.5	23.28	28.09	65.2	43.69	53.28
ILL.dck-BSU00140.1~654	98.03	106	101.66	51.31	48.9	50.14	67.83	83.55	74.39	21.23	7.31	13.86
ILL.dctB-BSU04440.1~1053	14.15	14.5	14.34	14.56	13.88	14.23	16.93	19.58	17.9	9.38	7.6	8.34
ILL.dctP-BSU04470.1~1266	293.44	171.46	239.49	207.24	221.13	214.21	401.13	243.78	318.26	556.49	23.54	277.36
ILL.dctR-BSU04460.1~681	14.17	15.09	14.61	14.54	13.71	14.14	10.93	15.96	13.22	6.18	9.18	7.61
ILL.dctS-BSU04450.70~1677	11.66	12.36	12	13.58	13.83	13.71	11.32	14.15	12.55	5.3	9.65	7.44
ILL.ddl-BSU04560.175~1239	230.38	246.2	237.93	145.48	124.7	135.26	189.93	190.06	187.3	54.85	94.78	74.38
ILL.deaD-BSU39110.1~1440	104.63	116.74	110.26	105.14	86.74	96.07	69.46	98.88	82.83	19.78	22.56	20.93
ILL.def-BSU14560.7~561	116.55	152.5	132.86	121.07	145.9	133.41	144.72	180.3	165.2	59.38	93.89	76.5
ILL.def-BSU15720.27~509	50.95	57.2	53.44	212.01	205.72	208.99	65.19	79.76	72.74	47.83	80.14	64.01
ILL.degA-BSU10840.18~1031	21.21	24.76	22.84	29.61	28.55	29.1	17.66	20.52	18.81	14.54	16.97	15.57
ILL.degQ-BSU31720.193~333	7.11	9.97	8.4	37.41	36.71	37.08	9.04	43.01	26.89	55.85	53.52	54.14
ILL.degR-BSU21940.37~219	87.8	124.61	103.43	396.38	264.53	331.33	38.07	34.3	35.88	9.85	61.92	36.24
ILL.degS-BSU35500.1~1158	75.93	85.49	80.36	66.03	66.55	66.31	61.04	91.35	75.07	36.31	50.64	43.08
ILL.degU-BSU35490.2~691	148.34	174.35	160.27	137.34	134.52	136	161.2	208.84	182.33	97.56	143.47	119.53
ILL.deoC-BSU39420.1~672	193.51	177.32	186.55	144.57	133.11	138.96	214.78	234.09	220.56	235.58	182.4	204.73
ILL.deoD-BSU19630.1~702	204.59	229.36	215.82	143.15	114.22	128.9	151.17	218.49	179.99	125.2	233.14	178.31
ILL.deoR-BSU39430.35~976	40.41	43.27	41.77	50.68	51.79	51.25	66.74	55	60.25	30.31	26.05	27.77
ILL.des-BSU19180.162~1220	12.6	33.89	22.15	26.96	32.58	29.75	1.84	22.44	12	4.78	27.25	16.17
ILL.desK-BSU19190.5~1117	4.46	7.81	5.96	12.24	14.66	13.44	2.83	8.71	5.68	5.2	9.44	7.29
ILL.desR-BSU19200.1~600	12.44	12.88	12.66	30.44	27.84	29.17	7.17	13.01	9.97	9.39	9.53	9.33
ILL.dfrA-BSU21810.1~507	94.26	97.69	95.99	279.5	299.44	289.49	67.88	162.06	112.92	148.77	183.65	164.46
ILL.dgcK-BSU09120.1~1080	83.23	87.3	85.22	29.43	36.4	32.89	57.14	92.62	73.77	14.94	69.51	42.49
ILL.dgcP-BSU29650.71~1810	41.49	47.91	44.45	32.4	37.75	35.07	31.71	57.8	44.09	42.53	64.86	53.29
ILL.dgcW-BSU13420.334~2583	12.92	17.47	14.98	71.23	78.35	74.79	2.95	4.17	3.51	0.35	0.59	0.47
ILL.dgk-BSU00150.1~624	92.38	106.33	98.81	45.45	46.98	46.23	66.85	89.24	76.65	22.98	10.71	16.43
ILL.dgkA-BSU25310.1~372	60.2	68.83	64.19	180.55	226.34	203.29	39.06	86.7	61.81	51.43	102.12	76.45
ILL.dgrA-BSU22910.1~654	41.07	34.66	38.29	58.35	60.63	59.5	20.28	27.47	23.47	10.95	43.88	27.53
ILL.dhaS-BSU19310.106~1593	66.4	70.69	68.46	118.66	116.77	117.77	67.48	94.79	79.9	338.97	91.6	208.12
ILL.dhbA-BSU32000.122~907	50.63	43.85	47.66	23	8.9	16.03	28.69	20.05	24.06	2.67	4	3.31
ILL.dhbB-BSU31970.1~939	42.77	36.49	40.05	23.69	9.68	16.77	18.3	16.13	16.98	2	2.05	2
ILL.dhbC-BSU31990.26~1222	46.7	41.36	44.38	25.75	9.21	17.57	33.08	20.53	26.43	3.16	3.71	3.41
ILL.dhbE-BSU31980.1~1620	35.69	35.03	35.45	19.75	6.61	13.25	25.18	15.35	19.98	2.06	2.67	2.34
ILL.dhbF-BSU31960.1~7137	25.26	22.16	23.93	23.48	8.65	16.15	5.9	4.47	5.11	0.89	0.68	0.77
ILL.dinB-BSU05630.14~532	40.07	37.21	38.87	15.05	11.17	13.13	22.92	39.18	30.68	150.9	94.93	120.57
ILL.dinF-BSU21710.72~1409	11.57	15.98	13.55	159.84	175.5	167.66	22.7	59.03	40.22	45.42	111.97	78.65
ILL.dinG-BSU22400.1~2796	91.52	96.87	94.1	192.24	192.89	192.65	113.65	145.77	127.8	43.52	97.7	70.49
ILL.divIB-BSU15240.88~879	52.62	53.86	53.14	143.26	187.23	165.09	54.58	85.02	70.4	34.03	79.44	57.49
ILL.divIC-BSU00620.18~395	203.9	244.28	222.38	288.81	373.3	330.75	135.17	252.18	190.39	21.14	120.37	71.2
ILL.divIVA-BSU15420.1~495	312.31	399.33	351.74	683.99	662.32	673.57	311.79	444.93	376.33	413.04	257.24	330.04
ILL.dltA-BSU38500.1~1512	511.53	554.92	531.95	365.69	497.01	430.85	215.13	356	282.84	7.62	64.27	36.44
ILL.dltB-BSU38510.1~1188	463.72	525.72	492.4	344.45	590.08	466.18	156.64	346.82	247.85	4.91	66.57	36.21
ILL.dltC-BSU38520.17~253	710.1	657.15	686.5	412.62	649.19	529.84	176.29	434.29	296.61	4.04	86.49	45.63
ILL.dltD-BSU38530.1~1179	491.01	568.22	526.54	403.12	568.08	484.95	204.41	353.42	276.35	4.66	54.75	30.11
ILL.dltE-BSU38540.1~759	524.06	617.87	567.07	388.15	550.09	468.47	249.16	378.19	309.5	12.39	60.12	36.51
ILL.dnaA-BSU00010.281~1621	303.73	297.61	301.62	244.35	287.33	265.73	121.25	330.49	222.46	169.82	241.05	203.65
ILL.dnaB-BSU28990.115~1533	36.94	34.89	36.1	195.33	198.06	196.76	34.06	72.09	52.33	136.02	238.32	186.13
ILL.dnaC-BSU40440.25~1389	101.15	121.19	110.32	51.3	53.07	52.19	79.03	139.04	107.45	34.78	87.86	61.3
ILL.dnaD-BSU22350.77~775	109.26	123.97	116.06	674.6	749.58	712.01	92.46	202.79	144.92	223.29	466	343.47
ILL.dnaE-BSU29230.1~3348	49.09	56.67	52.58	50.7	51.82	51.27	46.48	50.65	47.92	42.27	40.19	40.63
ILL.dnaG-BSU25210.1~1812	246.19	284.11	263.66	257.38	247.35	252.53	123.92	296.56	207.22	78.1	585.63	335.33
ILL.dnaI-BSU28980.1~936	50.67	49.31	50.16	254.12	290.8	272.38	45.24	96.67	70.28	131.44	282.02	206.3
ILL.dnaJ-BSU25460.200~1327	147.62	185.01	164.59	102.77	148.28	125.34	89.86	208.83	146.75	33.85	188.85	112.29
ILL.dnaK-BSU25470.24~1859	418.73	477.73	445.87	297.14	329.46	313.26	367.68	547.11	449.92	163.38	370.25	266.36
ILL.dnaN-BSU00020.179~1315	250.05	237.5	244.95	322.59	354.9	338.72	133.64	404.82	265.03	205.93	253.27	227.05
ILL.dnaX-BSU00190.36~1727	114.72	125.98	120	182.33	150.11	166.46	133.09	214.83	171.01	240.18	650.58	445.65
ILL.dppA-BSU12920.12~836	2.26	4.47	3.25	43.89	31.99	38.02	2.13	0.96	1.53	5.69	4.07	4.78
ILL.dppB-BSU12930.1~927	1.02	0.87	0.95	10.12	8.96	9.55	1.22	0.29	0.75	1.03	2.82	1.93
ILL.dppC-BSU12940.1~963	0.49	0.6	0.54	4.61	4	4.31	0.35	0.28	0.31	1.26	2.49	1.89
ILL.dppD-BSU12950.1~1008	0.43	0.75	0.57	5.43	3.78	4.61	0.19	0.15	0.17	0.86	1.65	1.25
ILL.dppE-BSU12960.3~1652	1.08	1.27	1.17	8.59	6.09	7.35	0.92	0.95	0.92	1.3	2.37	1.83
ILL.dprA-BSU16110.61~954	24.34	28.2	26.12	96.15	112.35	104.21	6.99	30.28	18.39	35.73	63.12	49.14
ILL.dps-BSU30650.1~438	170.77	236.45	200.37	506.52	366.88	437.63	116.09	133.61	122.89	384.98	79.14	224.58
ILL.drm-BSU23500.1~1185	370.83	404.76	386.76	255.1	315.04	284.88	389.63	572.12	474.07	159.01	318.39	237.95
ILL.dsdA-BSU23770.76~1422	19.54	19.5	19.57	31.08	26.94	29.05	16.87	19.03	17.68	8.76	11.59	10.08
ILL.dtpT-BSU03670.1~1479	73.88	53.23	64.8	11.49	11.21	11.36	108.87	126.92	115.55	135.51	109.4	120.24
ILL.dusB-BSU00810.24~1025	205.42	212.48	208.97	315.89	316.38	316.27	143.38	233.19	184.83	77.39	228.38	153.11
ILL.dusC-BSU08030.41~1018	63.09	71.38	66.91	48.84	62.47	55.61	31.98	102.09	66.05	31.9	104.05	68.19
ILL.dxr-BSU16550.1~1152	166.66	187.71	176.42	366.28	353.03	359.88	225.69	412.35	314.09	119.27	424.23	272.7
ILL.dxs-BSU24270.1~1902	104.01	136.81	118.89	191.82	203.68	197.78	146.64	164.41	153.15	86.67	138.12	111.64
ILL.eag-BSU13650.81~512	8.31	11.57	9.78	39.29	44.63	41.95	15.2	32.99	23.7	18	38.91	28.28
ILL.ebrA-BSU17300.7~324	18.85	18.36	18.67	21.18	15.46	18.36	10.46	17.74	13.94	7.25	34.17	20.77
ILL.ebrB-BSU17290.5~358	16.41	21.45	18.7	22.47	16.18	19.37	13.49	19.75	16.36	10.48	34.47	22.49
ILL.ecsA-BSU10040.378~1121	31.82	33.36	32.57	28.17	24.1	26.16	17.08	18.27	17.42	18.26	14.1	15.89
ILL.ecsB-BSU10050.1~1227	45.63	49.01	47.23	46.93	36.78	41.93	30.38	34.55	32.08	25.6	23.1	24.01
ILL.ecsC-BSU10060.18~728	63.89	77.85	70.26	60.3	53.93	57.17	40.29	55.96	47.15	30.7	33.81	31.82
ILL.efeM-BSU38270.1~1158	161.88	165.94	163.83	157.49	101.66	129.92	75.43	147.42	109.63	45.27	54.15	49.11
ILL.efeN-BSU38260.19~1269	174.47	186.43	180.16	172.78	116.73	145.11	94.59	168.89	129.77	46.84	55.64	50.65
ILL.efeU-BSU38280.25~1470	66.86	70.33	68.54	78.75	40.09	59.65	38.47	65.52	51.15	34.49	30.52	31.98
ILL.efp-BSU24450.25~582	700.25	785.13	739.66	503.23	505.52	504.58	717.81	919.59	806.79	404.87	565.22	480.76
ILL.eglS-BSU18130.34~1533	4.58	4.07	4.36	11.97	13.83	12.9	3.02	4.16	3.55	11.25	18.9	15
ILL.endB-BSU04650.18~299	1487.99	1537.74	1513.04	1119.7	1159.37	1139.84	909.57	1228.9	1059.43	742.19	1000.84	867.41
ILL.engA-BSU22840.27~1337	203.32	242.71	220.89	220.48	283.98	252	124.83	287.84	202.82	79.21	269.63	174.85
ILL.engB-BSU28190.1~588	160.68	202.94	179.91	245.77	220.16	233.2	105.61	157.06	130.01	130.15	183.47	155.73
ILL.eno-BSU33900.30~1322	1056.84	1120.73	1087.54	784.18	629.08	707.75	1348.17	1456.24	1380.06	93.44	259.08	176.37
ILL.epr-BSU38400.9~1946	55.92	75.76	64.77	669.25	744.56	706.82	11.24	13.92	12.42	0.5	0.33	0.4
ILL.epsA-BSU34370.38~742	4.05	7.64	5.66	1.61	1.19	1.4	0.53	0.59	0.56	0.43	0.75	0.59
ILL.epsB-BSU34360.6~689	4.98	6.93	5.84	1.21	0.77	0.99	0.58	1.47	1.01	0.17	0.16	0.16
ILL.epsC-BSU34350.1~1797	5.27	6.77	5.95	7.29	8.93	8.11	1.29	1.33	1.29	0.65	1.07	0.85
ILL.epsD-BSU34340.1~1146	5.39	7.03	6.14	5.39	6.38	5.88	1.51	1.59	1.53	0.56	1.25	0.9
ILL.epsE-BSU34330.1~837	4.57	6.11	5.27	4.65	4.26	4.45	0.83	1.12	0.96	0.21	0.75	0.48
ILL.epsF-BSU34320.1~1155	2.93	3.75	3.3	2.11	1.92	2.02	1.05	1.06	1.04	0.18	1.62	0.91
ILL.epsG-BSU34310.1~1104	1.7	2.63	2.12	1.04	1.17	1.1	0.81	0.95	0.86	0.08	0.76	0.42
ILL.epsH-BSU34300.25~1059	1.42	3.93	2.54	0.91	1.11	1.01	0.6	0.89	0.73	0.24	0.68	0.46
ILL.epsI-BSU34290.5~1081	2.73	3.19	2.94	1.28	1.89	1.58	1	0.97	0.99	0.16	0.48	0.32
ILL.epsJ-BSU34280.1~1035	3.15	4.59	3.8	1.72	2.4	2.06	1.27	1.75	1.48	0.29	3.47	1.9
ILL.epsK-BSU34265.1~1518	2.86	3.21	3.03	1.63	1.81	1.72	0.85	1.33	1.07	0.27	1.78	1.03
ILL.epsL-BSU34250.1~609	2.82	5.7	4.12	2.7	3.04	2.87	1.71	1.87	1.8	0.16	2.15	1.17
ILL.epsM-BSU34240.1~651	3.38	4.87	4.05	1.24	2.6	1.91	1.82	1.4	1.62	0.43	1.02	0.73
ILL.epsN-BSU34230.5~1171	3.13	5.78	4.32	1.3	2.32	1.8	0.85	1.2	1.01	0.33	1.22	0.78
ILL.epsO-BSU34220.1~969	3.58	5.18	4.31	1.68	2.24	1.96	0.85	1.59	1.2	0.67	1.54	1.1
ILL.era-BSU25290.1~906	181.88	224.71	201.41	502.06	610.91	556.16	163.66	273.42	215.63	227.7	326.36	274.73
ILL.estA-BSU02700.18~656	37.63	45.45	41.21	18.97	20.37	19.67	34.04	52.58	42.66	2.08	8.09	5.11
ILL.estB-BSU08350.6~638	48.1	59.5	53.07	33.88	41.29	37.56	37.74	39.62	38.73	6.56	19.32	13.19
ILL.etfA-BSU28520.12~989	48.12	45.47	47.03	44.28	49.57	46.92	38.97	48.88	43.27	445.28	35.19	230.32
ILL.etfB-BSU28530.15~788	47.25	46.39	46.7	52.78	51.85	52.34	33.87	51	41.85	419.01	43.63	220.2
ILL.eutD-BSU37660.43~1014	683.94	968.04	812.42	307.93	238.21	273.55	479.8	698.57	580.8	132.88	358.88	246.06
ILL.exlX-BSU18630.1~699	19.04	24.11	21.35	21.58	18.21	19.92	22.26	25.27	23.37	16.43	24.3	20.04
ILL.exoA-BSU22010.13~903	44.16	58.27	50.56	77.71	93.71	85.66	59.28	94.78	75.81	64.39	167.63	116.08
ILL.exoAA-BSU40880.9~767	23.98	32.12	27.48	57.05	81.82	69.34	71.24	153.82	112.7	43.16	297.55	175.09
ILL.exuM-BSU12310.68~1447	0.38	0.24	0.32	0.15	0.42	0.28	2.06	1.42	1.72	4.37	2.78	3.51
ILL.exuR-BSU12370.25~1026	23.49	25.18	24.29	44.93	47.98	46.46	15.59	24.08	19.58	15.13	12.2	13.42
ILL.exuT-BSU12360.1~1269	0.74	0.61	0.69	0.98	1.33	1.15	0.55	0.58	0.58	0.69	1.58	1.13
ILL.ezrA-BSU29610.1~1689	196.2	246.06	218.9	282.23	281.77	282.13	211.29	232.67	218.87	118.39	93.88	104.27
ILL.fabD-BSU15900.1~954	221.19	319.6	265.45	209.41	285.12	246.97	169.38	363.7	263.57	61.54	143.5	102.62
ILL.fabF-BSU11340.23~1264	206.86	419.79	302.52	117.17	209.38	162.87	204.06	372.88	284.06	63.38	162.03	112.64
ILL.fabG-BSU15910.1~741	278.74	385.92	326.74	293.65	350.72	322.02	252.29	415.94	334.56	80.12	156.3	118.27
ILL.fabG-BSU16870.55~783	21.29	20.3	20.89	52.67	56.5	54.59	54.58	67.08	59.91	43.73	145.8	95.72
ILL.fabG-BSU18500.21~737	237.2	268.34	251.14	73.64	63.04	68.43	178.85	300.08	233.76	93.04	323.33	208.51
ILL.fabG-BSU29420.41~808	65.21	61.94	63.88	37.05	30.41	33.78	51.44	61.08	55.59	59.28	70.38	64.12
ILL.fabHA-BSU11330.1~939	176.26	325.8	243.27	105.13	219.55	161.81	108.07	329.5	218.81	43.09	155.92	101.24
ILL.fabHB-BSU10170.2~979	15.72	47.3	29.88	15.06	43.69	29.24	20.55	44.31	31.83	2.08	5.2	3.64
ILL.fabI-BSU11720.136~912	379.43	648.41	500.5	199.68	367.97	283.06	418.28	768.55	584.41	218.46	345.85	280.17
ILL.fabL-BSU08650.1~753	149.18	181.29	163.67	97.28	94.08	95.74	100.71	142.63	121.43	49.53	93.67	71.35
ILL.fabZ-BSU36370.51~476	178.82	216.31	195.87	141.59	139.88	140.8	89.49	172.7	131.33	78.83	176.69	128.3
ILL.fadE-BSU32820.15~1799	7.13	6.02	6.65	13.17	10.94	12.07	4.51	4.62	4.5	155.48	5.59	76.9
ILL.fadF-BSU37180.37~2154	3.49	2.81	3.2	3.9	4.64	4.27	7.55	6.35	6.83	157.48	11.82	81.04
ILL.fadG-BSU14071.1~1731	17.23	14.15	15.89	13.06	15.69	14.36	7.66	14.4	10.88	55.75	23.89	38.74
ILL.fadM-BSU32850.1~909	0.16	0.2	0.18	0.26	0.09	0.18	0.25	0.3	0.27	0.14	0.36	0.25
ILL.fadN-BSU32840.1~2448	5.81	4.27	5.12	10.51	9.14	9.84	3.65	2.54	3.05	227.46	6.32	111.47
ILL.fadR-BSU28550.6~590	35.14	31.24	33.47	34.88	34.12	34.52	24.69	38.15	30.34	321.5	34.93	171.4
ILL.fbaA-BSU37120.73~930	2699.77	3100.16	2875.49	2108.2	2082.84	2096.56	3180.83	3257.67	3150.45	1075.39	1510.86	1280
ILL.fbp-BSU40190.1~2016	44.2	39.94	42.39	33.32	34.04	33.69	23.92	33.86	28.45	12.79	12.59	12.51
ILL.fdhD-BSU36710.19~807	38.78	48.07	42.6	53.59	56.31	54.96	43.9	56.24	49.06	32.55	156.71	95.13
ILL.fer-BSU23040.72~320	674.8	936.78	793.2	1010.38	835.69	924.39	1117.69	996.02	1044.31	730.57	482.93	596.37
ILL.feuA-BSU01630.1~954	61.48	53.65	58.07	21.73	11.28	16.57	46.65	43.51	44.31	7.91	5.5	6.57
ILL.feuB-BSU01620.1~1005	24.17	24.39	24.32	12.75	6.63	9.73	13.84	19.78	16.65	3.87	4.72	4.25
ILL.feuC-BSU01610.1~1011	22.9	25.68	24.19	12.74	7.72	10.26	14.6	20.91	17.44	2.86	5.29	4.06
ILL.ffh-BSU15980.14~1354	472.08	705.57	577.49	468.93	606.21	537.09	464.02	586.66	519.63	146.54	238.74	191.42
ILL.fhuB-BSU33310.1~1155	45.76	56.27	50.56	23.86	14.88	19.43	72.17	53.47	61.95	17.73	59.81	38.99
ILL.fhuC-BSU33290.16~825	113.85	130.43	121.35	70.94	46.93	59.08	116.55	113.42	113.9	25.82	56.67	41.17
ILL.fhuD-BSU33320.37~984	192.32	222.17	206.07	122.6	59.6	91.47	365.41	297.23	326.62	110.55	113.46	110.46
ILL.fhuG-BSU33300.1~1011	56.29	70.86	62.9	45.56	27.2	36.49	76.35	60.94	67.72	19.95	55.31	37.68
ILL.flgB-BSU16180.49~438	127.93	124.35	126.6	329.63	414.16	371.61	56.2	82.74	68.63	67.78	71.34	68.93
ILL.flgC-BSU16190.1~453	124.66	134.43	128.81	429.07	423	426.25	79.89	80.09	76.41	66.75	58.69	61.55
ILL.flgD-BSU16280.1~423	126.69	144.62	134.67	496.04	655.96	575.4	36.19	53.4	44.28	16.92	21.89	19.21
ILL.flgG-BSU16290.22~816	133.42	145.6	138.28	550.36	694.81	622.09	36.17	52.22	43.92	16.36	18.41	17.2
ILL.flgK-BSU35410.13~1536	126.48	154.13	138.96	823.58	1046.63	934.34	42.3	53.5	47.42	11.53	15.23	13.34
ILL.flgL-BSU35400.11~907	139.95	198.33	166.06	944.95	1257.7	1100.16	49.79	65.07	56.13	9.3	13.87	11.34
ILL.flgM-BSU35430.81~347	154.1	175.58	164.02	812.68	1103.24	956.83	44.43	69.41	56.16	15.2	24.69	19.81
ILL.flhA-BSU16390.1~2034	128.27	141.82	134.39	480.43	537.42	508.85	78.33	144.73	109.91	27.71	109.83	69.12
ILL.flhB-BSU16380.1~1083	78.72	83.53	80.89	356.93	385.9	371.43	21.17	31.59	25.94	2.33	4.05	3.21
ILL.flhF-BSU16400.1~1101	60.47	63.82	62.09	317.84	355.13	336.44	16.25	25.13	20.38	1.43	2.25	1.83
ILL.flhO-BSU36400.66~878	136.26	175.64	154.16	441.39	573.04	506.74	67.87	127.15	96	17.92	94.63	56.68
ILL.flhP-BSU36390.34~843	127.81	178.64	150.76	481.21	661.22	570.52	73.08	110.81	89.9	16.22	66.33	41.49
ILL.fliD-BSU35340.18~1514	170.85	210.41	188.9	770.98	836.47	803.73	45.15	64.5	53.94	6.58	15.94	11.25
ILL.fliE-BSU16200.1~321	151.45	159.5	155.37	423.27	534.32	478.41	62.44	97.69	78.8	49.51	67.05	57.76
ILL.fliF-BSU16210.8~1618	119.51	118.09	119.12	377.57	423.01	400.22	49.72	64.68	56.28	33.45	38.24	35.4
ILL.fliG-BSU16220.13~1029	116.1	108.43	112.74	405.88	461.53	433.6	44.48	57	50.26	18.87	30.42	24.51
ILL.fliH-BSU16230.1~627	105.29	110.47	107.83	408.97	426.76	417.95	41.75	57.44	48.83	19.65	24.58	21.85
ILL.fliI-BSU16240.1~1317	122.33	121.78	122.34	440.17	474.17	457.19	43.13	59.97	50.8	21.67	25.57	23.32
ILL.fliJ-BSU16250.3~446	109.99	101.2	105.65	194.36	423.95	308.07	13.11	53.55	32.57	12.83	21.32	16.85
ILL.fliK-BSU16270.1~1464	117	112.8	115.35	457.98	476.17	467.18	33.42	44.78	38.55	14.38	16.4	15.2
ILL.fliL-BSU16300.1~423	85.93	83.64	84.67	293.21	370.15	331.42	17.65	31.74	23.84	4.78	5.99	5.33
ILL.fliM-BSU16310.34~1032	122.35	121.29	121.94	471.64	488.6	480.24	33.64	46.32	39.75	7.8	9.67	8.7
ILL.fliP-BSU16350.1~666	93.42	88.93	91.45	367.44	467.16	416.95	19.46	38.19	28.4	2.77	5.01	3.87
ILL.fliQ-BSU16360.1~270	97.92	101.21	99.49	458.68	441.93	450.6	23.36	36.42	31.78	1.3	4.23	3.01
ILL.fliR-BSU16370.1~780	69.02	75.06	71.87	297.03	365.37	330.98	19.69	29.56	24.36	2.43	4.19	3.29
ILL.fliS-BSU35330.1~402	172.64	229.56	198.3	786.61	1023.89	904.38	44.27	61.73	52.34	6.12	17.94	12.1
ILL.fliT-BSU35320.1~342	251.24	328.54	285.96	1137.25	1529.05	1331.64	56.95	97.99	72.6	10.38	25.39	17.84
ILL.fliY-BSU16320.1~1137	134.55	141.72	137.84	550.15	571.12	560.77	46.48	58.23	51.51	8.89	12.47	10.66
ILL.fliZ-BSU16340.13~672	106.17	102.02	104.53	425.91	476.16	450.97	30.74	44.71	37.25	4.52	5.69	5.05
ILL.fmnP-BSU23050.106~678	42.46	55.23	48.17	113	105.56	109.37	121.66	147.39	131.19	188.18	127.5	154.94
ILL.fmt-BSU15730.5~958	68.31	70.39	69.34	299.33	319.57	309.48	88.27	118.89	102.67	63.92	111.06	87.04
ILL.fni-BSU22870.1~1050	122.27	151.52	135.53	604.89	500.3	553.38	90.8	139.99	112.99	363.95	371.22	362.4
ILL.fnr-BSU37310.5~721	11.53	13.12	12.23	12.45	9.73	11.11	6.42	8.68	7.39	4.97	7.19	6.03
ILL.folB-BSU00780.1~363	95.89	88.84	92.8	213.75	193.82	203.98	75.83	82.02	82.21	35.31	124.47	85.39
ILL.folC-BSU28080.60~1352	60.96	57.79	59.67	30.39	28.21	29.32	47.86	66.6	56.39	6.53	36.13	21.5
ILL.folD-BSU24310.12~863	312.89	399.12	352.1	430.94	411.52	421.52	278.1	482.57	378.59	231.15	220.33	223.93
ILL.folE-BSU22780.188~760	225.45	281.49	250.2	813.93	846.86	830.58	394.87	720.2	552.72	936.42	2642.9	1814.51
ILL.folK-BSU00790.1~504	142.03	131.55	137.64	224.55	234.48	229.56	121.45	134.12	128.18	59.48	175.8	119.69
ILL.frlB-BSU32610.3~989	5.31	10.66	7.71	1119.25	653.71	889.31	1.24	4.1	2.63	7.68	19.81	13.74
ILL.frlD-BSU32570.1~855	3.57	2.99	3.32	85.1	39.47	62.55	2.65	3.95	3.25	1.66	4.91	3.29
ILL.frlM-BSU32580.1~903	0.08	0.49	0.27	78.18	34.38	56.53	0.04	0.29	0.16	0.34	1.12	0.73
ILL.frlN-BSU32590.58~936	0.62	1.3	0.92	113.45	68.71	91.36	0.16	0.49	0.32	0.84	3.32	2.11
ILL.frlO-BSU32600.72~1340	1.19	1.89	1.51	218.16	134.08	176.63	0.41	0.52	0.45	1.31	6.82	4.09
ILL.frlR-BSU32560.1~789	18.45	20.61	19.46	65.1	85.79	75.37	22.61	31.06	26.49	31.87	31.02	31.02
ILL.frr-BSU16520.1~558	887.67	989.53	934.94	809.01	833.21	821.34	693.23	1130.83	926.5	304.4	1027.34	675.83
ILL.fruA-BSU14400.1~1908	40.93	43.46	42.15	48.69	62.21	55.41	52.45	72.33	61.46	54.9	50.58	51.91
ILL.fruK-BSU14390.1~912	41.23	40.16	40.83	44.25	54.56	49.37	51.36	59.35	54.24	50.8	55	52.18
ILL.fruR-BSU14380.8~763	36.29	35.19	35.87	38.39	52.22	45.25	49.02	58.16	52.8	59.16	57.17	57.35
ILL.ftsA-BSU15280.2~1324	270.75	287.02	277.87	439.39	469.9	454.68	215.13	324.69	266	216.78	301.83	256.96
ILL.ftsE-BSU35260.114~800	172.63	252.19	208.56	218.73	282.6	250.44	87.54	352.16	216.1	278.74	699.31	488.57
ILL.ftsH-BSU00690.1~1914	953.18	1100.02	1020.78	678.55	640.56	660.04	717.02	950.97	821.37	548.68	829.71	683.71
ILL.ftsL-BSU15150.1~354	218.73	261.78	236.62	325.28	356.82	341.03	238.82	253.58	239.8	278.7	263.58	267.83
ILL.ftsR-BSU18420.35~892	13.53	16.04	14.68	22.28	25.43	23.85	5.65	15.31	10.31	12.28	21.82	16.96
ILL.ftsW-BSU14850.206~1417	49.12	63.89	55.83	284.63	267.2	276.13	86.1	235.28	158.33	209.76	355.46	280.91
ILL.ftsX-BSU35250.1~891	200.12	309.26	248.98	306.43	362.66	334.39	168.56	433.34	296.06	433.38	814.69	621.62
ILL.ftsY-BSU15950.1~990	154.42	192.66	171.7	453.37	455.62	454.68	184.75	224.99	201.82	114.08	225.04	168.91
ILL.ftsZ-BSU15290.1~1149	377.24	472.5	420.53	771.15	899.13	834.83	370.9	517.41	440.85	327.78	390.32	355.71
ILL.fumC-BSU33040.1~1389	279.04	392.01	330.15	288.41	228.09	258.68	355.69	366.04	355.88	85.34	153.16	118.69
ILL.fur-BSU23520.10~459	248.07	338.96	289.1	214.25	204.63	209.59	405.45	378.48	379.93	191.52	306.07	247.07
ILL.fusA-BSU01120.54~2132	6275.38	6548.76	6409.41	3611.98	5429.2	4513.04	3946.26	5041.08	4436.68	416.55	1608.68	1018.37
ILL.fxsA-BSU29170.87~470	288.83	324.45	305.31	389.39	421.23	405.32	357.47	604.23	477.15	244.44	433.86	338.85
ILL.gabD-BSU03910.1~1389	37.27	37.62	37.49	21.54	16.62	19.11	22.35	22.5	22.19	36.63	19.35	27.3
ILL.gabP-BSU06310.9~1418	6.61	7.59	7.06	53.43	31.92	42.81	3.91	2.35	3.09	14.48	9.25	11.61
ILL.gabR-BSU03890.1~1440	2.48	3.11	2.77	5.61	5.26	5.44	1.17	1.73	1.43	7.4	3.63	5.36
ILL.gabT-BSU03900.107~1417	1.02	1.49	1.23	4.53	3.84	4.19	0.94	1.53	1.22	0.64	3.17	1.92
ILL.galE-BSU38860.1~1020	244.63	305.79	272.49	241.27	242.44	241.96	233.37	259.89	243.41	136.69	124.59	128.74
ILL.galK-BSU38200.81~1253	25.52	27.31	26.23	26.57	31.76	29.15	22.33	27.49	24.45	10.99	11.12	10.9
ILL.galT-BSU38190.1~1542	39.41	43.27	41.22	41.67	44.33	43.01	35.84	46.83	40.84	20.29	14.89	17.25
ILL.ganA-BSU34130.19~2082	9.14	6.69	8.06	8.86	8.31	8.59	9.55	10.01	9.64	7.56	4.87	6.08
ILL.ganB-BSU34120.1~1290	3.64	3.28	3.49	4.02	4.01	4.02	5.64	7.48	6.5	5.29	3.04	4.08
ILL.ganP-BSU34150.1~1257	10	5.5	8.01	7.23	8.27	7.75	16.48	13.16	14.63	13.51	6.68	9.86
ILL.ganQ-BSU34140.1~852	7.56	5.01	6.43	7.08	6.8	6.95	10.93	10.02	10.33	10.8	7.59	9.02
ILL.ganR-BSU34170.44~1036	10.27	9.87	10.11	13.55	14.79	14.17	7.33	14.51	10.79	5.61	11.69	8.62
ILL.gapA-BSU33940.13~1020	2001.21	2492.43	2224.61	1639.06	1503.37	1572.61	2372	3353.23	2830.88	235.42	775.12	508.01
ILL.gapB-BSU29020.36~1058	16.16	13.82	15.15	6.99	8.66	7.82	6.78	18.43	12.41	2100.88	11.81	1008.06
ILL.garD-BSU02510.91~1623	5.94	6.71	6.29	13.71	15.9	14.8	11.61	15.28	13.26	12.39	19.05	15.63
ILL.gatA-BSU06680.1~1458	466.16	499.24	481.9	306.36	257.43	282.27	346.1	538.7	435.88	143.29	260.07	200.68
ILL.gatB-BSU06690.1~1431	493.57	543.21	516.79	363.47	301.8	333.1	432.6	590.75	504.39	162.1	244.31	201.65
ILL.gatC-BSU06670.103~393	565.26	533.16	552.06	260.55	257.23	259.02	297.68	562.86	424.12	154.27	325.9	239.35
ILL.gbsA-BSU31060.16~1488	2	2.68	2.31	7.39	6.67	7.04	1.24	1.82	1.51	0.6	2.41	1.51
ILL.gbsB-BSU31050.1~1209	4.73	4.61	4.68	10.14	8.92	9.54	2.97	2.99	2.94	1.81	4.84	3.33
ILL.gcp-BSU05940.1~1041	42.84	58.32	49.85	407.91	442.29	425.1	82.85	262.73	170.04	259.6	1265.31	767.59
ILL.gcvPA-BSU24560.30~1376	22.4	22.83	22.63	41.4	38.98	40.22	13.82	7.73	10.55	15.79	12.64	13.96
ILL.gcvPB-BSU24550.1~1467	26.32	26.41	26.42	48.11	52.99	50.55	12.83	9.17	10.86	17.44	13.41	15.14
ILL.gcvT-BSU24570.74~1162	24.18	23.45	23.9	41.74	38.04	39.93	22.8	11.23	16.79	23.15	17.6	20.05
ILL.gdh-BSU03930.1~786	0.53	0.36	0.45	0.77	0.79	0.78	0.55	0.71	0.62	0.57	5.56	3.1
ILL.gerAA-BSU33050.1~1449	0.24	0.32	0.28	0.49	0.44	0.47	0.1	0.67	0.38	0.23	1.36	0.8
ILL.gerAB-BSU33060.1~1098	0.39	0.16	0.29	0.63	0.43	0.53	0.14	0.24	0.18	0.08	0.62	0.35
ILL.gerAC-BSU33070.1~1122	0.63	0.47	0.56	0.89	1.08	0.98	0.26	0.53	0.39	0.3	1.64	0.98
ILL.gerBA-BSU35800.1~1452	0.35	0.47	0.41	0.59	0.5	0.54	0.47	0.6	0.53	0.2	0.37	0.28
ILL.gerBB-BSU35810.6~1112	0.99	1.15	1.06	1.27	2.04	1.65	1.23	1.78	1.48	0.57	1.76	1.17
ILL.gerBC-BSU35820.1~1125	3.43	3.32	3.39	2.72	3.88	3.3	2.73	4.5	3.56	2	4.54	3.27
ILL.gerD-BSU01550.1~558	0.61	1.1	0.83	0.73	0.45	0.59	0.78	0.65	0.7	0.41	1.07	0.74
ILL.gerE-BSU28410.7~231	44.6	39.37	41.91	163.43	123.08	143.54	96.15	101.98	100.04	212.21	149.11	178.6
ILL.gerKA-BSU03700.1~1635	1.48	1.19	1.35	1.26	1.53	1.39	1.11	1.7	1.4	0.82	3.84	2.38
ILL.gerKB-BSU03720.25~1146	3.3	2.49	2.94	3.46	4.82	4.14	2.64	3.43	2.99	1.44	4.51	2.99
ILL.gerKC-BSU03710.1~1224	1.75	1.7	1.73	2.32	2.74	2.53	1.05	2.62	1.79	0.38	4.13	2.3
ILL.gerM-BSU28380.1~1101	2.52	2.76	2.63	4.21	3.95	4.08	7.55	16.69	11.93	10.31	53.68	32.24
ILL.gerPA-BSU10720.1~222	1.77	0.44	1.18	0.39	2.77	1.57	0	3.11	1.47	0.84	3.27	2.05
ILL.gerPB-BSU10710.1~243	0.57	1.43	0.95	0	0	0	0	0	0	1.02	0.66	0.83
ILL.gerPC-BSU10700.23~640	0.68	0.99	0.82	0.33	0.68	0.5	0.39	1.43	0.89	1.04	1.81	1.41
ILL.gerPD-BSU10690.1~177	0.7	0.88	0.78	0	0.8	0.4	0	2.46	1.11	2.45	5.04	3.71
ILL.gerPE-BSU10680.1~402	0.35	0.87	0.58	0.88	1.03	0.96	0.72	1.36	1.02	0.84	1.58	1.2
ILL.gerPF-BSU10670.23~250	1.43	2.81	2.05	0.89	0.91	0.9	1.05	2.65	1.81	0.24	3.28	1.77
ILL.gerT-BSU19490.1~474	0.46	0.23	0.36	0.3	0.2	0.25	0.29	0.49	0.38	0.77	3.32	2.05
ILL.ggaA-BSU35690.1106~2446	35.19	32.93	34.19	70.39	144.32	107.01	2.43	34.22	18.12	15.99	53.05	34.7
ILL.ggaB-BSU35680.1~2703	39.35	42.48	40.82	176.3	347.06	260.9	5.28	38.72	21.68	7.21	28.87	18.13
ILL.ggt-BSU18410.21~1784	0.32	0.35	0.34	1.3	1.23	1.27	0.59	0.26	0.42	2.14	0.47	1.26
ILL.gid-BSU16130.76~1383	68.88	80.58	74.25	186.89	233.79	210.19	66.98	131.66	97.86	34.1	111.9	73.25
ILL.gidA-BSU41010.1~1887	155.97	163.07	159.46	138.72	176.55	157.5	87.92	155.94	120.24	43.41	168.12	106.27
ILL.gidB-BSU41000.14~733	198.36	204.56	201.52	156.52	224.82	190.4	81.32	199.12	139.03	29.49	115.08	72.62
ILL.glcD-BSU28680.1~1413	54.89	71.75	62.53	305.19	434.27	369.21	36.53	12.14	23.9	79.14	27.65	51.81
ILL.glcF-BSU28690.1~1335	39.7	62.21	49.85	258.11	345.96	301.71	22.15	13.01	17.34	60.93	21.56	40.05
ILL.glcK-BSU24850.11~976	32.39	33.76	33.07	76.17	89.08	82.59	24.23	31.43	27.34	25.11	77.11	51.19
ILL.glcP-BSU10520.29~1234	3.12	2.68	2.93	4.25	6.04	5.14	1.28	4.27	2.73	1.62	3.95	2.78
ILL.glcR-BSU36300.21~797	16.6	18.85	17.64	40.53	44.92	42.72	6.87	20.96	13.69	2.37	12.89	7.71
ILL.glcT-BSU13880.8~874	88.58	92.72	90.61	81.53	111.05	96.18	74.26	132.28	101.83	45.96	82.93	64.04
ILL.glcU-BSU03920.1~864	0.13	0.11	0.12	0.23	0.05	0.14	0.09	0.31	0.2	0.56	2.46	1.52
ILL.glgA-BSU30950.1~1455	2.41	2.14	2.29	18.44	24.71	21.55	14.35	59.52	36.51	82.64	1006.97	553.79
ILL.glgB-BSU30980.17~1900	0.78	1.29	1.01	13.71	14.7	14.21	3.2	67.49	34.81	142.66	838.69	495.14
ILL.glgC-BSU30970.1~1143	1.7	1.92	1.8	16.41	20.95	18.66	6.43	61.23	33.35	124.68	967.38	552.52
ILL.glgD-BSU30960.24~1055	1.56	1.89	1.71	17.36	22.43	19.88	11.32	59.59	35.14	128.85	1054.39	599.24
ILL.glgP-BSU30940.1~2397	1.9	2.45	2.15	15.1	15.94	15.52	19.1	55.73	37.03	59.91	703.76	387.93
ILL.glmM-BSU01770.1~1347	145.2	151.64	148.34	152.15	163.65	157.91	126.39	278.58	199.14	99.06	1266.84	692.06
ILL.glmS-BSU01780.90~1892	579.35	640.81	607.91	511.31	503.43	507.63	415.18	621.46	508.24	1862.98	370.29	1075.72
ILL.glmU-BSU00500.43~1413	503.01	541.66	521.32	252.88	261.05	257.03	314.66	411.51	357.52	73.88	353.94	215.51
ILL.glnA-BSU17460.1~1335	862.94	1037.85	942.86	1082.61	1043.21	1063.58	626.38	1255.33	933.96	359.1	479.95	416.8
ILL.glnH-BSU27440.1~822	0.18	0.11	0.15	0.1	0.25	0.17	0	0.14	0.07	0.05	0.31	0.18
ILL.glnJ-BSU02440.116~1348	7.37	9.43	8.31	8.7	9.06	8.88	8.36	10.26	9.19	7.44	7.52	7.38
ILL.glnK-BSU36520.1~351	27.21	17.33	22.86	22.09	19.22	20.68	13.71	13.88	13.62	64.32	13.14	37.51
ILL.glnL-BSU02450.11~955	14.63	17.78	16.07	13.03	11.93	12.49	10.44	13.37	11.52	5.84	6.38	6.01
ILL.glnM-BSU27450.1~651	0.06	0.07	0.07	0	0.07	0.03	0	0	0	0	0.27	0.14
ILL.glnP-BSU27460.1~657	0.18	0.22	0.2	0.13	0.13	0.13	0	0.13	0.06	0.07	0.2	0.14
ILL.glnQ-BSU27430.1~729	0	0	0	0.11	0	0.06	0.05	0.06	0.05	0.06	0.12	0.09
ILL.glnR-BSU17450.1~408	298.31	339.8	317.38	307.94	385.85	346.63	73.05	507.44	284.1	112.61	154.92	132.56
ILL.glnT-BSU02420.1~1437	0.67	0.83	0.74	0.36	0.5	0.43	0.4	0.8	0.59	0.63	0.67	0.64
ILL.glpD-BSU09300.38~1705	17.56	15.61	16.72	34.59	32.59	33.62	33.64	49.8	41.15	74.39	190.78	132.61
ILL.glpF-BSU09280.126~950	93.82	71.17	83.84	48.03	54.82	51.41	365.36	317.39	336.04	937.15	630.56	767.82
ILL.glpG-BSU24870.1~1524	15.07	16.98	15.95	39.79	43.15	41.47	15.7	22.13	18.62	34.17	135.16	85.1
ILL.glpK-BSU09290.1~1491	157.65	136.15	148.36	81.77	90.05	85.9	385.15	426.86	399.96	1066.1	724.73	877.72
ILL.glpP-BSU09270.1~579	86.3	88.01	87.24	126.41	139.45	132.92	79.55	117.37	97.06	91.84	38.9	63.65
ILL.glpQ-BSU02130.99~980	186.77	123.89	159.01	25.74	31.41	28.55	160.3	235.94	195.47	444.02	210.78	319.14
ILL.glpT-BSU02140.1~1335	132.71	88.71	113.27	21.07	22.57	21.82	128.89	179.18	151.83	374.55	184.76	272.59
ILL.glpX-BSU37090.31~996	254.99	290.96	271.56	616.32	620.22	618.51	333.59	362.53	344.06	220.23	241.62	228.04
ILL.gltA-BSU18450.47~4609	9.36	14.2	11.54	503.97	464.3	484.55	26.14	46.64	35.85	54.75	71.81	62.61
ILL.gltC-BSU18460.31~933	29.12	35.56	32.06	63.86	67.62	65.75	34.77	45.05	38.93	54.77	51.27	51.63
ILL.gltD-BSU18440.17~1498	12.04	22.46	16.73	759.42	808.33	783.96	62.38	58.2	59.46	31.63	63.42	47.33
ILL.gltP-BSU02340.1~1245	0.95	0.86	0.91	2.01	1.29	1.65	3.28	1.64	2.43	2.2	2.47	2.31
ILL.gltR-BSU26670.6~896	9.88	8.34	9.21	9.52	7.18	8.37	2.52	8.39	5.44	2.73	9.29	6.09
ILL.gltT-BSU10220.66~1355	500.53	580.14	536.96	451.18	355.7	404.12	315.25	451.86	378.07	250.08	376.4	310.83
ILL.gltX-BSU00920.1~1452	270.3	296.96	282.76	416.97	408.33	412.87	162.59	329.13	241.76	145.23	338.62	241.69
ILL.glxK-BSU40040.25~1173	8.31	9.61	8.91	7.74	7.77	7.76	6.06	7.19	6.53	4.98	3.82	4.32
ILL.glyA-BSU36900.1~1248	623.2	697.29	657.36	1122.8	958.53	1041.98	347.09	584.38	457.4	212.04	246.61	226.61
ILL.glyQ-BSU25270.83~970	145.97	155.98	150.67	159.01	178.01	168.48	65.85	140.49	101.57	180.77	895.78	542.1
ILL.glyS-BSU25260.1~2040	142.06	166.68	153.36	175.63	204.35	189.92	83.36	141.34	110.69	169.5	817.66	497.05
ILL.gmk-BSU15680.1~615	457	502.75	478.3	406.28	468.14	437.08	290.19	508.75	392.61	133.63	232.96	182.36
ILL.gmuA-BSU05820.1~333	20.66	18.7	19.74	6.8	8.51	7.64	37.23	31.15	33.2	178.06	66.47	119.22
ILL.gmuB-BSU05810.1~312	36.91	22.44	30.53	8.55	12.82	10.67	44.58	36.6	40.49	215.58	89.17	149.78
ILL.gmuC-BSU05830.1~1329	24.43	15.35	20.42	7.43	7.99	7.71	31.29	27.86	29.1	126.51	53.2	87.36
ILL.gmuD-BSU05840.1~1398	27.64	17.2	23.03	8.41	10.22	9.31	28.37	29.06	28.3	88.74	46.27	65.86
ILL.gmuE-BSU05860.29~928	26.67	19.79	23.65	12.51	14.12	13.31	13.62	15.01	13.99	17.27	9.52	13.04
ILL.gmuF-BSU05870.1~948	29.95	15.16	23.4	8.98	8.84	8.92	6.3	7.42	6.78	5.81	2.11	3.8
ILL.gmuG-BSU05880.1~1089	29.25	19.84	25.1	9.35	9.37	9.36	6.33	8.21	7.16	7.36	2.5	4.78
ILL.gmuR-BSU05850.22~735	29.31	21.06	25.68	16.31	17.57	16.94	25.32	27.3	26.29	60.67	36.01	47.32
ILL.gntK-BSU40060.1~1542	15.36	11.53	13.68	18.98	21.79	20.38	19.89	24.31	21.77	39.87	30.08	34.3
ILL.gntP-BSU40070.1~1347	100.43	87.52	94.86	60.93	69.56	65.23	74.34	101.46	86.63	39.65	48.18	43.43
ILL.gntR-BSU40050.16~747	11.55	5.75	8.95	13.08	12.34	12.72	12.63	16.89	14.07	49.53	32.49	39.71
ILL.gntZ-BSU40080.4~1410	257.89	259.98	259.36	156.14	177.9	166.98	181.67	297.81	236.18	52.29	118.26	85.13
ILL.gpr-BSU25540.154~1260	0.69	1.2	0.92	10.28	11.6	10.94	2.32	2.53	2.39	6.03	16.38	11.21
ILL.gpsA-BSU22830.1~1038	243.22	290.68	264.95	301.22	381.55	341.11	187.44	359.26	268.84	124.67	362.89	244.11
ILL.greA-BSU27320.77~550	587.06	783.3	674.52	681.61	730.44	706.08	395.89	769.21	573.63	362.87	739.65	550.81
ILL.groEL-BSU06030.1~1635	1649.11	1596.37	1628.54	706.69	289.3	500.39	930.14	990.18	945.59	979.65	872.45	910.77
ILL.groES-BSU06020.10~294	2905.86	2473.77	2717.33	864.08	371.72	620.85	1174.26	1451.78	1285.07	1356.01	1480.33	1398.92
ILL.grpE-BSU25480.1~564	571.47	573.34	573.3	327.64	342.65	335.21	408.56	653.36	522.17	167.74	471.96	320.71
ILL.gsaB-BSU08710.23~1312	84.78	104.58	93.82	81.85	91.48	86.65	81.07	101.88	90.13	37.89	59.01	48.1
ILL.gsiB-BSU04400.13~384	0.89	1.38	1.05	6.63	5.54	6.09	2.42	3.55	2.94	191.36	19.06	100.95
ILL.gspA-BSU38430.1~861	3.91	2.45	3.27	6.85	4.72	5.8	5.68	3.21	4.39	73.92	10.27	40.51
ILL.gtaB-BSU35670.73~951	376.88	449.68	409.95	354	284.72	319.86	374.32	411.26	386.85	305.58	193.84	244.14
ILL.guaA-BSU06360.88~1629	582.25	646.72	612.25	723.9	663.25	694.19	275.54	697.72	478.57	154.83	431.87	293.64
ILL.guaB-BSU00090.1~1467	980.92	1045.82	1011.65	1448.1	1365.02	1407.6	494.81	726.82	603.18	545.15	643.68	588.31
ILL.guaC-BSU32130.44~1024	34.12	41.68	37.57	10.49	14.13	12.29	17.18	43.5	29.88	12.21	33.52	22.88
ILL.guaD-BSU13170.125~595	2.1	1.85	1.99	8.84	5.97	7.43	0.84	1.21	1.01	13.79	28.74	21.19
ILL.gudB-BSU22960.39~1322	498.66	638.73	562.18	543.57	541.52	542.79	436.33	544.71	483.5	421.77	353.32	381.09
ILL.gudD-BSU02490.1~1368	0.51	0.69	0.59	2.32	1.81	2.07	0.69	0.45	0.56	0.24	0.63	0.43
ILL.gudP-BSU02480.1~1368	1.29	1.88	1.56	3.84	4.71	4.27	2.83	1.54	2.18	0.64	1.31	0.97
ILL.gutB-BSU06150.109~1170	7.32	7.39	7.37	6.69	7.33	7.01	6.2	6.77	6.39	5.82	5.77	5.71
ILL.gutP-BSU06160.74~1465	2.08	1.82	1.97	3.73	4.51	4.12	1.42	1.17	1.29	1.32	1.55	1.42
ILL.gutR-BSU06140.4~2493	21.21	19.01	20.27	18.78	18.23	18.52	17.31	19.38	18.06	14.3	10.38	12.1
ILL.gyrA-BSU00070.211~2676	318.89	368.17	341.59	462.62	595.38	528.53	334.62	471.41	397.13	142.85	215.77	177.92
ILL.gyrB-BSU00060.17~1933	251.47	317.47	281.51	398.5	476.93	437.49	207.46	310.06	254.91	121.16	174.04	146.31
ILL.hag-BSU35360.95~1009	2866.59	4321.47	3522.71	17874.4	25408.1	21611.1	954.6	1008.42	965.01	48.6	45.75	46.49
ILL.hbs-BSU22790.200~478	6703.41	8183.5	7378.97	4563.5	3956.63	4265.16	5554.59	7437.93	6403.38	5942.12	8488.52	7155.04
ILL.helD-BSU33450.54~2378	50.03	56.34	52.95	32.5	32.94	32.73	17.75	49.29	33.04	127.56	526.54	328.92
ILL.hemA-BSU28170.75~1442	80.91	101.14	90.07	136.07	131.16	133.7	86.29	98	90.8	94.94	125.5	109.15
ILL.hemAT-BSU10380.1~1299	77.95	93.96	85.27	304.18	342.36	323.21	15.12	20.73	17.66	0.7	1.85	1.27
ILL.hemB-BSU28130.1~975	80.04	97.98	88.23	237.63	278.11	257.77	75.24	111.78	92.15	52.62	120.4	86.36
ILL.hemC-BSU28150.33~977	50.24	58.57	54.07	156.57	173.39	164.96	36.9	68.04	51.68	43.55	101.67	72.52
ILL.hemD-BSU12230.39~851	46.01	52.73	49.11	99.93	71.74	86.02	19.29	41.68	30.06	39.43	46.55	42.48
ILL.hemD-BSU28140.1~789	57.75	69.01	62.9	156.03	183.76	169.83	46.88	75.55	60.25	34.98	97.65	66.35
ILL.hemE-BSU10120.38~1099	57.59	70.13	62.97	43.27	48.3	45.78	30.5	46.11	37.46	16.1	39.27	27.61
ILL.hemH-BSU10130.1~933	92.94	107.47	99.63	71.34	75.77	73.57	50.88	74.44	62.03	28.8	63.31	45.97
ILL.hemL-BSU28120.1~1293	133.15	161.95	146.23	373.75	415.01	394.33	148.59	184.37	163.9	107	163.16	134.05
ILL.hemN-BSU25500.53~1192	31.49	34.3	32.81	81.38	99.22	90.24	27.34	52.68	39.81	17.03	72.45	45.08
ILL.hemX-BSU28160.1~831	34.14	41.25	37.39	106.38	125.66	115.96	23.3	48.87	35.55	40.13	90.28	65.09
ILL.hemY-BSU10140.1~1413	56.71	76.71	65.77	57.61	62.95	60.28	34.28	54.65	43.81	20.29	44.3	32.16
ILL.hemZ-BSU09840.2~1507	55.48	70.69	62.4	55.53	65.68	60.58	45.76	151.99	97.39	71.93	197.84	135.04
ILL.hepS-BSU22760.164~919	205.5	211.91	208.79	262.72	332.01	297.13	165.69	503.62	329.33	218.73	1005.39	616.1
ILL.hepT-BSU22740.1~1047	179.55	201.65	189.8	260.06	273.43	266.79	171.84	391.18	277.24	110.9	483.48	298.92
ILL.hfq-BSU17340.1~222	73.55	90.79	81.4	176.35	97.38	137.37	93.74	67.35	80.34	38.38	36.93	37.25
ILL.hinT-BSU10030.29~466	169.53	215.45	189.78	115.82	77.21	96.76	169.66	206.92	183.6	180.66	130.35	150.9
ILL.hisA-BSU34880.1~738	2.01	3.14	2.52	5.07	4.56	4.82	0.7	1.25	0.99	0.81	1.92	1.39
ILL.hisB-BSU34900.1~585	2	3.18	2.53	2.62	3.66	3.14	0.58	0.66	0.61	0.17	0.55	0.36
ILL.hisC-BSU22620.1~1083	128.53	151.83	139.22	269.96	278.87	274.49	112.76	108.38	109.08	94.77	100.51	96.4
ILL.hisD-BSU34910.1~1284	0.84	1.21	1.01	2.43	2.78	2.6	0.2	0.23	0.21	0.16	0.55	0.36
ILL.hisF-BSU34870.1~759	2.39	2.54	2.46	4.1	3.47	3.79	1.2	1.16	1.16	0.42	1.18	0.8
ILL.hisG-BSU34920.1~642	1.47	1.22	1.36	2.19	2.37	2.28	0.58	0.58	0.57	0	0.55	0.32
ILL.hisH-BSU34890.1~639	1.05	1.76	1.37	3.2	4.16	3.68	0.64	0.39	0.51	0.22	0.7	0.46
ILL.hisI-BSU34860.1~630	2.78	4.68	3.64	6.15	5.73	5.95	1.48	1.44	1.5	1.34	1.82	1.6
ILL.hisJ-BSU29620.197~1003	41.74	37.18	39.79	117.44	103.24	110.46	19.35	32.06	25.32	23.11	27.95	25.25
ILL.hisS-BSU27560.90~1364	90.56	98.32	94.19	30.18	47.27	38.65	47.56	82.77	64.34	17.88	128.85	74.43
ILL.hisZ-BSU34930.51~1226	1.06	1.24	1.14	1.11	1.67	1.39	0.27	0.18	0.22	0.24	0.61	0.43
ILL.hmp-BSU13040.13~1212	0.87	0.72	0.8	1.99	2.29	2.14	2.75	3.89	3.27	2.6	3.19	2.86
ILL.holA-BSU25560.25~1068	35.37	39.51	37.29	48.21	60.87	54.5	31.73	44.01	37.38	19.84	33.51	26.53
ILL.holB-BSU00310.12~1001	126.54	118.04	122.24	203.12	212.3	207.75	104.12	237.79	168.19	124.64	719.57	426.09
ILL.hom-BSU32260.1~1302	46.28	68.86	56.47	635.07	551.75	594.11	16.87	22.17	19.22	11.55	14.38	12.83
ILL.hpr-BSU09990.41~652	102.5	117.47	109.34	367.33	303.76	336.03	80.32	57.57	67.67	209.76	123.93	162.77
ILL.hprK-BSU35000.35~967	108.31	114.6	111.34	148.11	121.74	135.12	115.05	86.91	98.91	94.85	72.25	82.04
ILL.hprP-BSU34970.1~651	165.17	169.65	167.52	204.35	194.87	199.75	122.12	167.76	142.75	77.08	97.88	86.68
ILL.hprT-BSU00680.1~543	294.7	344.7	316.71	257.94	246.92	252.6	189.57	316.06	247.93	132.43	314.87	223.04
ILL.hrcA-BSU25490.1~1032	131.64	110.56	122.47	158.38	152.12	155.35	162.41	177.58	169.06	148.15	207.48	177.95
ILL.hslO-BSU00710.12~887	151.16	160.34	155.58	136.37	152.69	144.5	146.14	223.08	181.87	61.08	408.26	236.77
ILL.hslU-BSU16160.17~1420	238.96	260.7	249.16	358.73	405	381.78	174.4	314.9	240.92	71.87	218.43	145.45
ILL.htpG-BSU39820.83~1963	172.96	177.66	175.42	125.36	90.5	108.16	93.47	106.09	98.31	59.38	60.47	59.08
ILL.htrA-BSU12900.43~1392	26.36	28.02	27.12	31.35	32.53	31.95	15.67	22.68	18.96	26.07	18.46	21.82
ILL.htrB-BSU33000.1~1377	34.07	40.86	37.18	45.06	53.31	49.16	28.27	39.59	33.45	28.09	31.09	29.23
ILL.htrC-BSU40360.1~1203	79.04	94.51	86.12	154.04	191.7	172.75	144.95	306.67	222.36	148.19	1372.79	769.2
ILL.hutG-BSU39380.1~960	2.08	2.15	2.11	19.05	18.27	18.67	6.84	7.25	6.94	11.35	5.03	7.98
ILL.hutH-BSU39350.1~1527	0.2	0.5	0.34	10.99	10.61	10.8	5.04	3.32	4.06	16.71	5.52	10.78
ILL.hutI-BSU39370.13~1278	2.26	2.77	2.5	19.68	20.43	20.06	8.72	7.51	8	13.63	5.62	9.38
ILL.hutM-BSU39390.1~1428	0.74	0.88	0.8	6.59	6.62	6.61	2.36	3.04	2.6	2.91	1.66	2.23
ILL.hutP-BSU39340.3~458	8.82	11.08	9.8	65.22	56.04	60.71	92.91	10.75	51.22	60.86	8.72	33.55
ILL.hutU-BSU39360.1~1659	2	2.16	2.08	16.83	17.21	17.03	7.45	6.18	6.72	16.18	5.99	10.75
ILL.hxlA-BSU03460.8~640	21.41	22.72	22.05	23.08	20.13	21.63	8.39	14.11	11.08	10.4	7.17	8.61
ILL.hxlB-BSU03450.1~558	21.29	21.72	21.41	22.87	16.89	19.92	12.86	16.49	14.54	12.81	6.37	9.41
ILL.hxlR-BSU03470.135~497	14.03	14.06	14.07	6.65	5.35	6.01	9.2	11.12	10.02	3.74	8.26	5.98
ILL.icd-BSU29130.1~1272	615.59	849.81	721.06	1427.74	1384.85	1407.12	428.76	361.53	389.65	362.08	310.06	330.5
ILL.ileS-BSU15430.53~2818	243.29	287.84	263.72	51.14	39.8	45.55	161.38	313.94	234.02	53.12	357.91	207.57
ILL.ilvA-BSU21770.23~1291	18.2	29.27	23.19	501.35	547.32	524.32	8.07	5.97	6.92	40.69	29.04	34.14
ILL.ilvB-BSU28310.122~1846	2.35	3.21	2.74	46.21	40.95	43.63	0.55	0.65	0.59	0.42	1.15	0.78
ILL.ilvC-BSU28290.24~1052	2.58	4.09	3.26	84.18	63.24	73.85	1.28	1.25	1.25	0.82	1.76	1.29
ILL.ilvD-BSU21870.166~1842	4.26	8.67	6.23	461.42	481.42	471.52	3.06	2.12	2.55	5.9	2.44	4.05
ILL.ilvH-BSU28300.1~519	2.91	2.41	2.61	44.57	34.97	39.84	0.67	0.43	0.54	0	0.64	0.33
ILL.immA-BSU04810.1~510	21.21	17.16	19.22	12.86	19.17	15.99	7.01	15.31	11.02	26.59	28.18	26.89
ILL.immR-BSU04820.25~408	44.92	37.18	41.56	27.47	36.37	31.89	32.13	31.21	31.1	74.89	45.41	59.04
ILL.infA-BSU01390.1~219	6159.06	5639.22	5941.16	3575.39	6765.22	5155.06	2850.02	4189.17	3470.2	166.4	987.47	578.29
ILL.infB-BSU16630.1~2151	299.89	366.38	330.25	1531.42	1678.6	1604.94	359.1	641.3	492.89	693.36	923.13	800.45
ILL.infC-BSU28870.59~580	2507.15	2574.6	2532.63	1243.01	1882.74	1560.18	1185.31	2863.04	1983.37	1526.03	5132.71	3335.36
ILL.iolB-BSU39750.1~816	9.92	6.64	8.47	14.47	17.9	16.17	11.36	7.9	9.43	17.3	5.31	10.88
ILL.iolC-BSU39740.1~978	9.46	6.1	7.95	12.56	13.69	13.12	10.85	7.78	9.19	11.9	3.87	7.65
ILL.iolD-BSU39730.1~1914	10.2	7.28	8.91	12.87	16.52	14.68	8.48	8	8.14	10.87	3.79	7.11
ILL.iolE-BSU39720.1~894	10.42	7.54	9.15	12.4	13.53	12.96	6.43	8.17	7.25	7.49	2.04	4.64
ILL.iolF-BSU39710.1~1317	11.34	7.98	9.86	9.98	12.52	11.24	5.79	7.73	6.69	5.26	1.75	3.4
ILL.iolG-BSU39700.1~1035	13.74	9.28	11.77	11.21	13.96	12.58	6.98	9.1	8.01	6.65	2.07	4.23
ILL.iolH-BSU39690.1~870	12.84	10.88	11.99	10.93	10.84	10.89	8.14	8.52	8.23	6.87	1.67	4.13
ILL.iolI-BSU39680.86~922	11.63	9.33	10.63	12.05	14.18	13.11	6.16	8.16	7	4.85	1.92	3.29
ILL.iolJ-BSU39670.21~893	11.37	10.88	11.17	14.26	13.48	13.88	8.94	10.43	9.52	5.92	3.49	4.58
ILL.iolR-BSU39770.17~772	58.21	47.79	53.67	41.79	52.42	47.07	45.4	55.06	49.46	112.78	75.64	92.43
ILL.iolS-BSU39780.28~960	114.74	116.04	115.49	77.8	78.82	78.34	95.16	112.96	103.93	173.75	108.15	138.04
ILL.iolT-BSU06230.1~1422	1.72	1.17	1.48	1.23	1.79	1.51	4.59	2.01	3.24	13.83	1.83	7.45
ILL.ipi-BSU11130.4~363	71.09	75.41	73.17	45.82	46.82	46.34	25.91	64.36	44.35	31.24	64.47	47.66
ILL.ipk-BSU00460.22~891	112.37	139.48	124.73	100.87	124.98	112.84	64.18	193.21	126.62	164.33	948.22	560.73
ILL.iscS-BSU27510.1~1140	105.47	138.61	120.49	98.69	119.47	109.02	142.98	163.23	151.04	79.68	249.36	165.06
ILL.iscS-BSU29590.84~1229	48.35	48.87	48.68	49.1	53.61	51.35	28.28	61.77	44.34	36.18	44.76	40.03
ILL.iscU-BSU32680.1~444	959.99	1027.14	990.8	1260.38	1465.82	1362.61	616.33	925.29	757.15	360.33	607.79	481.32
ILL.iseA-BSU18380.25~570	35.29	25.9	31.16	25.03	23.02	24.05	32.95	20.72	26.52	2.18	1.89	2
ILL.ispA-BSU13190.33~992	1.09	0.79	0.96	1.6	1.98	1.79	2.95	2.63	2.75	4.74	2.34	3.45
ILL.ispA-BSU24280.1~891	45.09	62.5	52.95	70.68	90.93	80.73	40.22	89.77	63.93	25.6	77.54	51.66
ILL.ispD-BSU00900.15~713	46.15	61.3	53.02	96.28	98.44	97.39	51.87	68.05	59.14	37.3	87.05	62.07
ILL.ispF-BSU00910.1~477	21.81	33.44	27.06	63.52	55.33	59.49	11.23	25.12	17.8	12.52	70.89	42.03
ILL.ispG-BSU25070.1~1134	161.18	202.31	179.87	228.99	205.55	217.49	131.19	183.47	154.6	85.74	94.07	88.8
ILL.ispH-BSU25160.84~1028	87.57	101.09	93.8	103.61	96.71	100.24	92.48	142.69	115.82	137.16	124.43	128.79
ILL.jag-BSU41030.1~627	785.57	992.12	879.55	278.34	269.69	274.18	348.53	1094.51	710.02	288.65	1321.74	809.83
ILL.kamA-BSU19690.29~1444	0.31	0.32	0.32	0.39	0.63	0.51	0.05	0.2	0.12	0.11	1.02	0.57
ILL.kapB-BSU31460.1~387	40.02	46.4	42.89	40.44	27.81	34.21	40.74	42.76	41.35	38.91	46	42.07
ILL.kapD-BSU31470.15~632	2.5	3.1	2.77	6.49	7.49	6.99	1.8	2.32	2.03	3.64	5.98	4.81
ILL.katA-BSU08820.10~1461	64.02	78.04	70.33	83.53	98.17	90.81	59.93	71.3	63.96	183.07	94.52	135.22
ILL.katE-BSU39050.4~2064	0.74	0.57	0.66	1.38	1.11	1.25	0.87	0.89	0.87	14.8	3.17	8.67
ILL.katX-BSU38630.30~1673	0.48	0.55	0.51	0.67	0.62	0.65	0.67	0.63	0.64	12.06	2.51	7.02
ILL.kbaA-BSU01560.110~706	27.2	28.76	27.95	21.14	17.92	19.56	11.59	42.09	26.38	19.7	61.17	40.5
ILL.kbl-BSU17000.1~1179	44.11	29.69	37.6	14.33	13.75	14.05	88.62	56.41	71.31	207.65	51.85	125.11
ILL.kdgA-BSU22100.2~592	7.14	7.25	7.2	8.46	12.13	10.28	11.51	9.25	10.34	3.8	28.06	16.79
ILL.kdgK-BSU22110.1~975	10.38	11.69	10.99	17.41	22.24	19.81	11.7	14.94	13.13	3.25	48.41	26.21
ILL.kdgR-BSU22120.34~1053	13.57	13.07	13.38	18.94	25.2	22.05	10.26	15.78	12.83	2.2	60.99	32.09
ILL.kdgT-BSU22090.1~993	9.68	9.71	9.71	10.33	13.27	11.79	14.15	13.12	13.5	6.48	28.02	17.39
ILL.kduD-BSU22140.2~766	15.18	21.82	18.18	37.05	37.84	37.45	19.6	16.3	17.74	4.04	4.39	4.16
ILL.kduI-BSU22130.51~878	19.74	26.37	22.75	40.18	43.99	42.09	24.59	20.92	22.4	5.03	6.85	5.89
ILL.khtS-BSU09870.5~343	29.57	19.46	25.12	11.12	13.69	12.39	34.35	22.71	28	27.84	30.92	29.04
ILL.khtT-BSU09860.11~508	16.16	11.51	14.12	7.72	3.99	5.88	12.78	10.6	11.55	12.69	21.35	16.91
ILL.kinA-BSU13990.51~1871	3.91	5.16	4.48	9.97	7.69	8.85	3.27	2.42	2.8	0.84	1.67	1.25
ILL.kinB-BSU31450.14~1300	6.44	7.51	6.93	13.39	10.78	12.11	3.53	4.71	4.06	13.09	17.2	15
ILL.kinC-BSU14490.13~1299	47.31	47.19	47.35	63.92	71.88	67.89	42.53	59.52	50.21	19.05	40.47	29.68
ILL.kinD-BSU13660.1~1521	37.47	41.45	39.32	100.84	120.55	110.64	32.73	39.86	35.74	16	24.56	20.09
ILL.kinE-BSU13530.17~2233	1.41	2.38	1.85	10.56	7.62	9.11	1.71	8.42	4.98	3.47	16.07	9.83
ILL.kipA-BSU04090.3~1010	12.17	16.15	13.98	70.97	71.04	71.04	8.26	7.01	7.48	9.45	7.36	8.25
ILL.kipI-BSU04080.1~723	10.38	12.29	11.13	81.31	69.55	75.53	7.56	7.26	7.31	13.15	8.43	10.23
ILL.kipR-BSU04100.8~760	13.65	15.89	14.68	66.33	71.64	68.99	9.09	8.56	8.68	9.63	8.09	8.71
ILL.ksgA-BSU00420.1~879	121.3	153.9	136.04	187.23	183.03	185.23	60.35	217.78	136.72	88.83	497.9	295.69
ILL.ktrA-BSU31090.73~741	20.34	19.57	20.04	18.98	21.7	20.33	7.34	32.28	19.47	37	72.06	54.31
ILL.ktrB-BSU31100.7~1344	19.75	20.97	20.34	19.38	20.79	20.09	8.79	31.66	20.07	32.41	68.68	50.61
ILL.ktrC-BSU14510.1~666	118.15	130.31	123.83	196.79	211.04	203.93	75.07	120.49	96.33	88.91	99.93	93.24
ILL.ktrD-BSU13500.17~1366	51.47	63.85	57.11	78.28	70.49	74.45	28.06	83.47	54.92	68.59	161.33	114.81
ILL.lcfA-BSU28560.27~1709	17.45	17.43	17.48	19.56	20.59	20.08	32.44	46.49	38.75	71.95	60.77	65.23
ILL.lctP-BSU03060.1~1626	5.44	5.94	5.67	11.25	9.72	10.5	198.24	6.47	100.77	8.87	4.17	6.34
ILL.ldh-BSU03050.54~1019	8.17	6.5	7.44	9.99	10.36	10.18	243.81	8.16	124.57	10.02	4.91	7.28
ILL.lepA-BSU25510.24~1862	192.47	234.29	211.57	172.98	184.99	179	148.51	216.8	180.03	53.78	150.83	102.52
ILL.leuA-BSU28280.1~1557	2.27	2.68	2.46	36.37	27.05	31.77	0.25	0.43	0.35	0.21	0.71	0.46
ILL.leuB-BSU28270.1~1098	2.26	3.53	2.84	38.86	26.38	32.7	1.01	0.54	0.75	0.47	0.8	0.63
ILL.leuC-BSU28260.50~1468	3.62	5.35	4.4	51.29	39.92	45.69	1.48	2.02	1.72	0.42	1.04	0.73
ILL.leuD-BSU28250.1~600	3.48	4.57	3.97	43.17	29.62	36.48	0.84	1.91	1.35	1.69	0.98	1.34
ILL.leuS-BSU30320.110~2524	211.53	209.93	211.23	130.41	131.59	131.05	178.5	228.75	200.58	35.56	50.46	42.64
ILL.levB-BSU34460.1~1551	0.24	0.66	0.43	1.19	1.72	1.45	2.26	4.85	3.51	5.03	54.52	30.15
ILL.levD-BSU27070.11~451	1.57	2.93	2.18	4.9	2.83	3.87	10.81	1.15	5.96	4.24	5.12	4.63
ILL.levE-BSU27060.1~489	1.13	3.01	1.97	4.4	3.83	4.12	9.26	1.83	5.56	4.15	5.68	4.92
ILL.levF-BSU27050.12~821	1.09	1.52	1.28	2.99	2.35	2.68	5.73	1.53	3.61	3.65	3.79	3.67
ILL.levG-BSU27040.21~848	1.18	1.56	1.35	2.98	2.81	2.89	3.45	1.09	2.24	2.2	4.24	3.21
ILL.levR-BSU27080.203~3010	3.13	3.63	3.36	6.15	8.4	7.27	3	4.47	3.68	8.47	11.08	9.68
ILL.lexA-BSU17850.18~635	210.76	237.28	222.96	335.43	328.48	332.13	261.47	323.48	287.86	833.42	419.74	611.37
ILL.lgt-BSU34990.14~823	128.17	136.26	129.77	161.66	168.14	164.94	116.28	106.37	107.88	68.37	75.15	70.47
ILL.liaF-BSU33100.34~759	28.89	30.4	29.62	38.85	42.15	40.5	25.08	38.55	31.29	59.3	305.82	183.78
ILL.liaG-BSU33110.61~933	30.64	33.13	31.81	40.07	51.55	45.77	35.22	44.37	39.22	77.4	404.31	242.59
ILL.liaH-BSU33120.27~704	19.91	24.79	22.13	13.55	14.25	13.91	19.98	26.18	22.78	508.64	1531.57	1022.15
ILL.liaI-BSU33130.9~389	16	17.47	16.69	13.11	12.58	12.85	16.3	19.39	18.11	468.98	1167.3	845.21
ILL.liaR-BSU33080.1~636	24.01	29.2	26.38	37.07	39.21	38.14	21.05	34.28	27.18	26.54	137.68	82.63
ILL.liaS-BSU33090.1~1083	27.18	31.96	29.37	40.79	41.83	41.32	25.45	35.18	29.84	46.28	196.53	122.08
ILL.licA-BSU38570.1~333	14.71	10.13	12.61	2.89	5.03	3.95	22.72	8.37	15.5	64.34	7.48	34.51
ILL.licB-BSU38590.126~434	7.69	4.4	6.24	3.4	5.48	4.43	20.45	6.45	13.46	54.79	9.06	30.87
ILL.licC-BSU38580.1~1359	8.2	3.54	6.13	4.09	3.9	4	18.06	7.28	12.51	50.86	5.56	27.08
ILL.licH-BSU38560.1~1329	16.03	8.84	12.83	6.56	6.81	6.69	17.66	12.53	14.83	68.2	6.82	35.95
ILL.licR-BSU38600.63~1988	15.63	15.15	15.45	20.83	15.28	18.09	5.18	11.1	8.01	32.08	23.95	27.48
ILL.licT-BSU39080.1~834	32.72	29.95	31.55	69.77	69.89	69.86	45.88	44.35	44.44	56.6	33.68	44.18
ILL.ligA-BSU06620.24~2030	81.45	91.23	85.99	76.16	89.06	82.58	48.53	59.19	53.18	12.58	44.23	28.51
ILL.ligB-BSU20500.59~871	0.47	0.48	0.47	1.76	1.76	1.76	0.04	1.02	0.54	1.87	3.24	2.54
ILL.ligD-BSU13400.4~1839	2.43	2.79	2.6	24.25	23.98	24.13	1.13	2.09	1.59	0.81	1.79	1.3
ILL.lipA-BSU32330.39~935	263.42	356.18	304.93	457.13	463.74	460.6	180.29	189.94	183.16	204.83	172.64	186.42
ILL.lipC-BSU04110.64~705	13.87	11.77	12.86	50.01	46.66	48.37	5.27	7.42	6.27	7.05	6.23	6.61
ILL.lmrA-BSU02680.26~592	34.58	52.07	41.83	39.66	47.95	43.78	34.71	102.37	67.78	31.11	109.01	70.64
ILL.lmrB-BSU02670.40~1479	31.08	44.95	37.33	31.24	33.95	32.6	19.54	77.43	47.76	6.68	40.47	23.8
ILL.lonA-BSU28200.88~2412	107.35	117.08	111.91	144.52	118.65	131.77	62.03	88.23	73.98	93.17	156.88	124.3
ILL.lonB-BSU28210.1~1659	1.31	1.75	1.51	17.25	17.82	17.54	14.73	30.64	22.53	31.52	104.05	68.96
ILL.lpdV-BSU24060.1~1425	68.61	64.46	66.9	41.26	34.28	37.82	107.27	76	90.22	33.8	31.53	32.16
ILL.lplA-BSU07100.1~1509	1.04	0.82	0.94	0.66	0.9	0.78	1.59	1.21	1.38	3.11	1.71	2.35
ILL.lplB-BSU07110.1~957	0.99	1.13	1.05	0.61	1.09	0.85	1.58	0.88	1.21	0.73	0.64	0.67
ILL.lplC-BSU07120.1~888	1.41	1.03	1.24	2.28	2.37	2.32	1.51	1.18	1.33	1.34	1.87	1.59
ILL.lplD-BSU07130.9~1349	1.87	2.19	2.02	3.09	2.82	2.96	1.15	1.91	1.5	1.2	1.85	1.51
ILL.lrgB-BSU38330.1~678	55.19	140.74	93.55	71.27	75.32	73.31	24.37	110.02	66.04	3.23	8.67	5.95
ILL.lrpA-BSU05050.5~415	39.96	42.63	41.07	13.25	29.09	21.1	14.05	48.99	31.12	18.67	33.37	26.05
ILL.lrpB-BSU05060.52~501	7.17	8.81	7.92	4.13	7.92	6.01	2.35	10.97	6.53	2.99	10.84	6.94
ILL.lrpC-BSU04250.12~446	24.45	22.14	23.47	43.13	43.86	43.51	13.5	21.07	16.98	11.66	110.91	61.86
ILL.lspA-BSU15450.21~485	135.03	168.32	150.19	106.63	108.23	107.47	86.32	185.55	133.55	83.84	240.39	162.14
ILL.ltaSA-BSU07260.268~2187	252.54	270.73	261.2	179.09	197.64	188.35	154.25	276.02	212.4	88.83	313.62	202.08
ILL.luxS-BSU30670.2~475	210.68	169.01	192.5	353.71	295.62	325.11	136.75	168.9	150.53	48.33	88.01	67.82
ILL.lysA-BSU23380.1~1320	86.6	119.54	101.33	381.55	382.29	382.08	43.04	82.28	61.71	56.2	90.04	72.65
ILL.lysC-BSU28470.126~1352	29.09	41.85	34.85	28.28	37.27	32.75	13.71	33.31	23.09	29.31	198.51	115
ILL.lysP-BSU33330.104~1513	42.34	60.42	50.51	152.37	153.21	152.85	13.76	114.14	62.94	104.51	403.95	255.44
ILL.lysS-BSU00820.1~1500	277.55	299.69	288.01	465.37	498.66	482.05	200.52	367.31	279.7	110.75	341.7	226.75
ILL.lytA-BSU35640.21~329	145.87	148.27	146.86	550.86	543.34	547.38	99.48	110.35	105.63	64.42	53.3	58.3
ILL.lytB-BSU35630.1~2118	83.27	89.72	86.33	411.31	418.23	414.92	50.68	70.42	59.68	32.38	31.35	31.38
ILL.lytC-BSU35620.39~1529	91.53	111.13	100.04	541.13	557.06	549.25	58.92	82.3	69.71	34.19	30.12	31.76
ILL.lytD-BSU35780.44~2686	87.25	97.62	92.07	345.85	352.39	349.24	29.34	43.14	35.71	16.11	21.77	18.75
ILL.lytE-BSU09420.1~1005	50.49	61.57	55.43	104.58	116.19	110.37	54.65	64.75	58.55	19.92	25.67	22.56
ILL.lytF-BSU09370.153~1619	129.47	173.75	149.53	591.66	701.39	646.23	35.15	57.84	45.88	8.23	34.83	21.77
ILL.lytG-BSU31120.21~869	76.42	81.77	78.97	83.02	86.73	84.89	45.09	117.2	79.95	107.83	314.79	211.59
ILL.lytH-BSU32340.166~1146	3.2	4.69	3.87	2	2.35	2.18	2.83	3.65	3.19	2.34	2.5	2.39
ILL.lytR-BSU35650.39~959	128.91	152.47	139.67	110.7	136.19	123.36	91.36	144.64	116.13	21.21	23.97	22.31
ILL.lytS-BSU28930.82~1863	14.96	18.84	16.72	36.67	39.32	38	12.92	12	12.3	11.73	22.64	17.13
ILL.lytT-BSU28920.1~726	30.55	33.67	32.01	45.91	54.5	50.18	15.65	18.94	16.99	9.29	21.58	15.41
ILL.maa-BSU40850.1~555	5.15	5.88	5.49	11.06	10.77	10.92	11.29	19.6	15.45	26.69	99.81	63.69
ILL.maeN-BSU31580.154~1500	31.4	25.62	28.88	48.68	44.33	46.55	23.07	38.64	30.4	9.28	6.21	7.58
ILL.maf-BSU28050.26~595	92.96	106.31	99.13	48.47	64.32	56.34	49.06	103.08	74.88	94.92	331.22	213.73
ILL.malA-BSU08180.1~1350	13.07	14.61	13.78	14.24	13.92	14.09	10.54	9.78	10	42.43	6.03	23.31
ILL.malL-BSU34560.1~1686	4.14	3.91	4.05	6.61	6.91	6.76	3.13	3.63	3.32	2.37	4.8	3.57
ILL.malP-BSU08200.1~1584	4.45	3.61	4.08	3.07	2.92	3	9.22	5.9	7.45	17.56	3.3	10.05
ILL.malQ-BSU08210.1~1722	6.93	7.21	7.07	4.47	3.96	4.22	5.65	6.82	6.13	8.17	6.1	7
ILL.malR-BSU08190.11~775	9.74	7.48	8.75	8.95	9.41	9.18	8.55	6.86	7.57	18.29	5.33	11.44
ILL.malS-BSU29880.82~1782	43.18	52.99	47.61	110.01	104	107.08	44.62	53.48	48.58	60.88	193.48	128.47
ILL.manA-BSU12020.1~948	289.21	125.88	216.75	7.2	6.21	6.71	19.69	88.02	53.56	104.84	230.51	167.89
ILL.manP-BSU12010.1~1953	205.56	91.23	154.84	6.66	5.27	5.97	13.57	60.62	36.52	72.88	203.54	138.37
ILL.manR-BSU12000.1~1947	54.04	34.59	45.45	6.09	5.23	5.66	18.02	52.66	34.83	42.3	181.12	112.38
ILL.mapA-BSU01380.1~747	3765.46	3986.7	3869.83	2781.65	4964.19	3863.12	2429.06	2706.35	2512.33	122.27	657.11	393.63
ILL.mbl-BSU36410.10~1011	530.48	720.04	616.21	323.82	339.21	331.58	510.83	716.7	607.95	173.45	290.93	231.37
ILL.mccA-BSU27260.58~981	23.68	14.65	19.69	12.5	13.3	12.9	10.6	11.07	10.68	6.32	10.45	8.33
ILL.mcpA-BSU31240.1~1986	99.49	130.51	113.57	659.57	767.94	713.5	36.53	36.73	36.13	2.1	1.95	1.98
ILL.mcpB-BSU31260.1~1989	62.4	86.26	73.2	559.96	577.04	568.66	11.84	19.69	15.53	3.59	3.74	3.61
ILL.mcpC-BSU13950.3~1970	60.21	79.54	68.98	555.23	539.58	547.72	20.96	20.81	20.58	3.67	10.3	7.01
ILL.mcsA-BSU00840.14~571	70.69	52.98	62.92	56.07	63.88	59.96	23.01	158.55	88.98	44.07	286.45	166.67
ILL.mcsB-BSU00850.1~1092	90.08	73.95	83.02	87.65	94.53	91.1	48.35	189.97	117.22	62.19	447.17	257.22
ILL.mdh-BSU29120.44~982	671.96	883.48	767.33	1589.9	1441.06	1516.92	450.97	373.72	406.27	401.21	311.55	349.92
ILL.mdr-BSU03070.7~1545	83.25	110.6	95.64	83.36	94.86	89.09	73.1	181.43	125.39	28.43	100.6	64.76
ILL.mdxD-BSU34620.1~1770	1.66	1.35	1.52	5.74	6.09	5.91	1.98	2.6	2.26	14.1	27.53	20.73
ILL.mdxE-BSU34610.1~1254	3.59	2.35	3.04	5.86	5.77	5.82	3.44	3.72	3.5	11.24	17.97	14.49
ILL.mdxF-BSU34600.1~1308	3.08	2.17	2.68	4.1	4.8	4.45	2.78	2.82	2.76	5.4	10.32	7.83
ILL.mdxG-BSU34590.1~837	2.66	1.65	2.22	3.93	4.01	3.97	2.18	2.57	2.34	4.16	7.4	5.75
ILL.mdxR-BSU34630.1~951	0.34	0.19	0.28	6.02	5.97	6	1.32	1.85	1.56	18.62	42.56	30.53
ILL.mecA-BSU11520.28~684	162.2	169.65	165.87	242.47	184.4	213.83	150.05	183.59	164.63	426.89	291.74	352.07
ILL.med-BSU11300.33~986	141.44	145.96	143.75	138.36	136.73	137.61	121.1	180.9	148.82	173.82	228.17	199.01
ILL.melA-BSU30300.1~1299	7.55	6.62	7.15	9.99	11.08	10.53	6.39	10.4	8.27	54.93	11.96	32.19
ILL.menA-BSU38490.73~1008	103.23	133.57	116.99	91.31	111.18	101.19	158.21	162.36	157.67	39.52	53.29	45.95
ILL.menB-BSU30800.35~850	421.15	463.13	440.8	328.98	323.44	326.38	321.71	424.9	368.61	227.84	337.51	280.66
ILL.menC-BSU30780.1~1116	31.54	32.87	32.2	129.77	133.46	131.65	58.71	73.97	65.39	71.77	135.16	103.03
ILL.menD-BSU30820.1~1743	49.55	61.59	55.03	52.04	60.95	56.47	38.74	56.67	47.09	18.09	53.5	36.04
ILL.menE-BSU30790.91~1551	39.97	35.9	38.21	144.33	146.1	145.27	66.99	81.96	73.82	93.51	200.73	146.96
ILL.menF-BSU30830.82~1497	95.52	106.15	100.47	84.35	90.36	87.36	86.82	97.88	90.98	47.61	81.93	64.4
ILL.metA-BSU21910.73~978	40.71	35.66	38.54	78.27	70.26	74.34	19.1	27.56	22.99	23.38	26.01	24.38
ILL.metE-BSU13180.67~2355	2.83	4.79	3.69	130.18	81	105.89	2.51	2.75	2.59	69.06	138.55	103.57
ILL.metK-BSU30550.168~1370	497.45	580.96	535.82	235.18	270.7	252.87	430.51	870.26	640.57	260.96	467.93	362.55
ILL.metN-BSU32730.1~825	391.7	437.61	413	234.29	308.44	271.09	125.32	300.17	209.26	65.36	360	214.32
ILL.metP-BSU32740.1~669	156.57	168.03	162.02	98.11	127.32	112.61	37.83	124.64	79.88	29.57	155.66	93.23
ILL.metQ-BSU32750.106~1131	122.69	134.62	128.28	74.4	81.49	77.94	34.11	97.98	65.09	34.13	147.36	91.29
ILL.metS-BSU00380.90~2084	167.68	167.99	168.16	153.54	143.22	148.5	144.74	179.59	159.79	96.09	367.57	232.94
ILL.mfd-BSU00550.70~3603	67.28	75.35	71.02	124.54	128.57	126.59	76.61	139.62	106.96	49.19	130.35	89.92
ILL.mgsA-BSU22480.16~429	57.25	63.16	60.01	75.15	55.39	65.4	59.86	64.09	61	44.66	56.89	50.27
ILL.mgsR-BSU24770.18~398	1.1	2.32	1.65	6.06	6.07	6.07	8.07	4.32	6.08	9.07	18.54	13.88
ILL.mgtE-BSU13300.297~1652	101.62	103.3	102.45	254.66	159.94	207.88	146.99	207.04	175.08	226.5	230.09	225.28
ILL.mhqA-BSU12870.16~966	6.22	6.65	6.43	8.82	9.83	9.33	13.7	15.42	14.37	8.74	9.51	9
ILL.mhqR-BSU13670.51~488	197.21	242.52	217.88	88.12	93.8	90.97	79.35	210.43	142.64	90.44	165.66	127.39
ILL.miaA-BSU17330.7~951	38.84	43.62	41.06	47.74	46.66	47.23	38.17	49.26	43.04	26.35	32.03	28.91
ILL.minC-BSU28000.1~681	371.63	372.13	372.09	319.31	414.1	366.36	116.36	349.28	230.24	50.97	236.33	144.78
ILL.minD-BSU27990.2~808	314.74	338.65	326.03	347.32	342.76	345.21	167.42	309.54	234.42	61	191.5	126.36
ILL.minJ-BSU35220.21~1214	93.57	130.55	110.21	230.93	217.36	224.31	97.93	101.29	100.6	61.75	109.88	86.76
ILL.mleA-BSU23550.16~1335	710.48	702.4	707.22	108.15	90.07	99.25	418.96	604.82	503.22	279.83	198.76	234.36
ILL.mleN-BSU23560.40~1446	547.43	487.43	521.71	67.06	63.64	65.4	275.42	467.78	366.3	223.97	183.49	200.17
ILL.mlpA-BSU16710.9~1238	74.83	94.65	83.85	606.4	624.45	615.6	301.03	765.63	525.71	332.39	1138.34	738.43
ILL.mmgA-BSU24170.1~1182	0.09	0.07	0.08	1.93	1.34	1.64	0.5	0.47	0.48	3.04	4.73	3.87
ILL.mmgB-BSU24160.1~864	0.3	0.21	0.26	1.84	2.17	2	0.62	1.12	0.88	2.51	5.44	3.97
ILL.mmgC-BSU24150.1~1140	0.22	0.23	0.22	1.74	1.47	1.61	0.49	0.23	0.35	1.6	3.84	2.72
ILL.mmgD-BSU24140.1~1119	0.41	0.43	0.42	1.4	2.48	1.93	0.5	0.6	0.54	1.37	2.85	2.11
ILL.mmr-BSU37570.1~1401	110.52	72.31	93.66	110.72	76.45	93.8	53.13	64.82	58.16	22.69	32.23	27.22
ILL.mmsA-BSU39760.173~1636	11.8	9.06	10.59	18.82	17.39	18.12	18.76	8.28	13.29	28.86	8.69	18.18
ILL.mmuM-BSU02410.6~953	5.86	11.75	8.51	63.92	54.71	59.39	1.33	3.44	2.37	9.66	4.87	7.09
ILL.mnaA-BSU35660.20~1162	62.17	73.08	67.18	49.77	49.72	49.77	40.79	65	52.05	37.77	39.95	38.33
ILL.mnmA-BSU27500.29~1144	131.18	179.43	152.69	113.93	155.5	134.55	163.79	190.6	175.31	68.68	236.06	153.59
ILL.mntA-BSU30770.135~1055	24.65	47.84	35.07	43.72	76.61	60.02	109.3	48.18	77.62	4.83	56.12	30.86
ILL.mntB-BSU30760.1~753	19.36	36.02	26.85	45.79	75.56	60.54	79.15	36.58	56.53	2.66	32.24	17.66
ILL.mntC-BSU30750.4~1311	18.76	32.97	25.15	41.2	69.04	55	74.06	30.29	51.42	3.31	28.92	16.36
ILL.mntD-BSU30740.1~888	25.02	43.16	33.19	52.33	85.5	68.77	92.02	39.89	64.86	3.48	33.81	18.85
ILL.mntH-BSU04360.29~1306	139.48	187.07	160.47	178.81	208.72	193.69	473.45	256.08	357.2	61.44	159.78	110.62
ILL.mntR-BSU24520.1~429	327.96	420.73	369.99	291.38	277.65	284.71	217.73	429.8	316.6	230.1	402.08	314.25
ILL.moaA-BSU36700.16~1041	57.22	60.4	58.76	78.08	76.89	77.52	56.02	71.09	62.75	57.01	185.49	121.6
ILL.moaB-BSU29460.85~597	63.62	91.08	76.03	239.07	304.87	271.74	150.59	304.57	223.55	108.99	599.99	357.06
ILL.moaC-BSU05960.1~513	83.47	76.52	80.54	64.5	64.97	64.76	72.29	84.57	77.25	46.84	55.19	50.44
ILL.moaD-BSU14310.1~234	63.9	79.47	70.98	75.71	74.54	75.17	55.57	76.22	65.06	23.06	60.76	41.76
ILL.moaE-BSU14300.1~474	50.14	50	50.18	54.06	59.38	56.72	42.52	52	46.5	16.7	57.3	37.23
ILL.mobA-BSU14260.11~610	25.55	29.8	27.5	20.05	21.65	20.85	25.63	33.72	29.43	12.16	49.27	31.12
ILL.mobB-BSU14290.1~522	49.81	50.4	50.17	56.31	64.7	60.48	42.66	52.48	46.85	16.76	58.71	37.87
ILL.moeA-BSU14280.18~1310	34.45	40.23	37.11	45.52	43.51	44.54	39.31	40.88	39.51	17.63	43.76	30.67
ILL.moeB-BSU14270.1~1020	35.66	38.34	36.93	38.41	41.2	39.81	34.24	42.58	37.87	17.93	49.55	33.78
ILL.motA-BSU13690.22~834	97.38	153.47	122.66	593.18	689.34	641.03	39.24	47.49	42.74	1.12	1.56	1.33
ILL.motB-BSU13680.1~786	126.27	193.27	156.44	718.01	922.87	819.72	48.65	57.52	52.07	1.25	1.37	1.29
ILL.mpr-BSU02240.35~976	8.52	11.17	9.72	60.81	57.28	59.09	14.28	6.86	10.45	22.02	11.31	16.27
ILL.mprF-BSU08425.39~2609	52.31	58.1	54.99	49.82	57.96	53.87	42.82	54.51	47.91	17.4	38.54	27.91
ILL.mraW-BSU15140.70~1005	224.89	272.67	246.69	291.46	332.76	312.03	247.85	279.38	259.87	304.86	324.71	311.15
ILL.mraY-BSU15190.112~1086	161.34	161.1	161.55	137.17	169.18	153.07	86.59	143.59	113.39	41.17	130.64	86.16
ILL.mreB-BSU28030.1~1014	348.3	397.42	370.97	339.99	349.95	345.07	151.84	380.96	262.83	131.68	358.58	245.63
ILL.mreBH-BSU14470.31~1038	3.4	4.42	3.87	2.46	3.08	2.77	1.68	2.87	2.24	3.59	4.89	4.2
ILL.mreC-BSU28020.1~873	391.68	420.43	405.35	337.09	394.77	365.79	143.74	393.12	264.15	94.62	353.82	225.12
ILL.mreD-BSU28010.1~519	195.38	210.31	202.39	142.45	218.2	180	41.63	194.76	116.14	28.41	136.21	82.8
ILL.mrgA-BSU32990.1~462	212.14	707.27	433.7	207.8	226.55	217.17	95.51	584.61	333.24	164.08	86.91	122.52
ILL.mrnC-BSU00950.4~435	62.94	61.51	62.44	106.72	110.73	108.75	35.94	51.14	43	15.75	53.4	34.63
ILL.mrpA-BSU31600.59~2464	67.42	57.37	63.07	38.14	36.61	37.4	46.69	53.3	49.26	30.43	55.52	42.76
ILL.mrpB-BSU31610.1~432	69.33	54.2	62.72	49.48	50.55	50.03	45.73	51.32	47.82	18.16	42.2	30.11
ILL.mrpC-BSU31620.1~342	55.55	50.32	53.33	41.92	39.01	40.5	35.96	44.51	39.91	15.93	30.16	22.84
ILL.mrpD-BSU31630.1~1482	58.03	49.42	53.84	47.57	42.44	45.05	36.17	44.47	39.95	11.71	25.35	18.59
ILL.mrpE-BSU31640.6~482	71.91	63.99	68.52	53.69	45.24	49.53	30.12	55.26	41.35	11.49	26.16	18.67
ILL.mrpF-BSU31650.1~285	81.21	80.42	80.35	59.43	65.56	62.49	41.79	77.77	58.89	12.54	29.93	21.05
ILL.mrpG-BSU31660.1~375	73.68	68.98	71.59	62.64	53.55	58.17	35.66	67.8	50.38	16.4	25.11	20.6
ILL.mscL-BSU36360.1~393	93.47	101.93	97.45	154.7	153.08	153.97	51.52	150.83	99.46	91.54	230.78	160.77
ILL.msmE-BSU30270.1~1281	1.69	1.01	1.39	4.28	3.03	3.66	6.26	2.69	4.41	58.07	8.48	31.98
ILL.msmR-BSU30260.14~1048	4.87	2.94	4.02	10.59	7.4	9.02	27.02	7.24	16.92	90.1	9.54	47.82
ILL.msmX-BSU38810.1~1098	48.5	40.58	44.98	56.7	51.55	54.18	98.09	57.5	76.69	167.19	12.47	86.03
ILL.msrA-BSU21690.20~553	43.3	42.69	43.08	61.62	52.42	57.09	23.98	41.16	31.76	83.25	79.08	79.49
ILL.mstX-BSU31321.47~379	0.13	0.47	0.28	1.52	0.99	1.25	0.66	0.81	0.79	0.46	0.43	0.44
ILL.mta-BSU36600.1~774	4.43	6.05	5.16	10.42	11.66	11.04	2.85	3.59	3.17	4.45	9.68	7.04
ILL.mtbP-BSU20250.1~1332	0.03	0	0.01	0	0.17	0.09	0.03	0.14	0.08	0.03	0.18	0.1
ILL.mtlA-BSU03981.1~1437	7.85	6.83	7.4	5.35	5.25	5.3	6.36	9.91	8.03	7.42	14.77	11.06
ILL.mtlD-BSU03990.2~1123	9.92	10.56	10.22	6.35	7.55	6.94	8.7	13.65	11.01	9.89	16.92	13.32
ILL.mtlF-BSU03982.1~432	12.23	10.79	11.61	7.36	7.75	7.56	8.99	11.66	10.23	8.89	16.83	12.86
ILL.mtlR-BSU04160.186~2270	29.36	26.42	28.1	26.6	25.21	25.92	29.7	56.76	42.61	46.42	42.91	43.96
ILL.mtn-BSU27270.21~716	152.24	196.68	172.4	139.48	132.21	135.94	131.64	171.19	153.25	82.18	120.43	100.51
ILL.mtnA-BSU13550.1~1062	1.99	3.33	2.59	93.1	91.61	92.4	0.73	1.05	0.87	13.46	47.06	30.36
ILL.mtnB-BSU13610.1~630	11.5	20.13	15.39	1063.02	1074.11	1068.97	15.97	26.89	21.1	239.32	176.95	204.35
ILL.mtnD-BSU13620.15~551	12.48	30.55	20.58	1433.88	1409.31	1422.35	24.8	33.53	28.93	339.62	212.69	270.68
ILL.mtnK-BSU13560.87~1286	1.56	1.84	1.69	65.44	66.53	66.01	0.39	0.79	0.58	13.68	42.68	28.26
ILL.mtnU-BSU13570.1~780	6.84	10.78	8.59	165.85	135.79	151.04	4.91	3.74	4.27	10.99	5.26	7.92
ILL.mtnW-BSU13590.58~1302	7.61	11.89	9.53	576.1	504.71	541.01	9.5	23.4	16.25	230.23	165.63	194.03
ILL.mtnX-BSU13600.1~708	9.02	17.26	12.72	786.84	766.62	777.18	11.1	26.13	18.31	199.2	178.14	185.7
ILL.mtrB-BSU22770.1~228	558.36	633.51	593.11	1592.34	1981.05	1785.36	746.04	1474.28	1092.03	2277.36	5604.11	3928.65
ILL.murAA-BSU36760.34~1344	931.69	1111.12	1013.84	377.42	398.36	387.94	428.57	892.06	651.32	124.06	546.19	337.35
ILL.murAB-BSU37100.379~1668	212.9	233.44	222.41	515.46	523.1	519.47	272.55	322.09	292.9	175.29	240.04	205.51
ILL.murB-BSU15230.32~943	150.76	197.44	171.74	227.03	302.64	264.56	121.62	184.28	150.44	35.98	137.46	87.13
ILL.murC-BSU29790.1~1299	325.33	391.57	355.63	309.25	375.84	342.34	239.41	401.8	315.87	98.89	242.64	170.65
ILL.murD-BSU15200.1~1356	202.16	196	199.82	186.92	240.75	213.64	133.4	178.27	153.55	45.56	151.86	99.04
ILL.murE-BSU15180.1~1485	193.24	218.34	204.83	152.74	167.76	160.24	127.5	202.02	162.33	90.77	208.95	149.66
ILL.murF-BSU04570.72~1445	75.34	79.79	77.45	158.49	169.04	163.78	100.56	158.72	127.45	65.19	118.21	91.22
ILL.murG-BSU15220.123~1214	100.67	115.56	107.54	153.27	198.9	175.92	68.36	117.65	91.62	18.18	93.2	56.11
ILL.murQ-BSU01700.29~943	29.22	21.15	25.65	20.24	16	18.15	31.27	7.8	19.19	26.29	8.14	16.6
ILL.mutL-BSU17050.1~1884	44.19	43.17	43.82	59.49	68.66	64.06	41.19	64.46	52.07	41.32	83.83	62.36
ILL.mutM-BSU29080.23~853	59.59	61.36	60.5	77.97	91.29	84.6	54.6	65.41	59.16	33.91	41.14	37.11
ILL.mutS-BSU17040.1~2577	38.05	38.58	38.36	46.84	52.16	49.49	36.31	60.83	47.98	34.7	88.35	61.71
ILL.mutSB-BSU28580.1~2358	68.2	73.81	70.85	141.06	166.14	153.54	78.32	107.64	91.66	47.14	125.41	86.32
ILL.mutT-BSU04330.1~450	4.04	6.01	4.93	17.08	27.26	22.13	5.22	18.32	11.44	14.53	88.5	52.08
ILL.nadA-BSU27850.1~1107	0.66	0.6	0.64	3.96	5.65	4.8	2.67	3.82	3.2	0.45	4.94	2.74
ILL.nadB-BSU27870.28~1623	0.61	0.7	0.65	4.74	5.54	5.14	2.41	4.38	3.35	0.65	7	3.96
ILL.nadC-BSU27860.1~870	0.68	0.89	0.78	2.38	3.46	2.91	2.21	3.39	2.76	0.97	4.25	2.62
ILL.nadD-BSU25640.12~581	172.74	211.41	190.39	178.31	252.5	215.1	100.36	267.11	180.65	22.76	131.97	77.9
ILL.nadE-BSU03130.75~893	219.86	301.63	256.39	185.83	142.84	164.64	301.72	332.06	312	160.7	154.99	155.44
ILL.nadR-BSU27890.1~543	65.54	77.24	70.87	63.96	62.04	63.04	51.35	75.56	63.18	78.06	79.13	77.89
ILL.nagA-BSU35010.14~1204	37.43	35.69	36.68	47.52	48.53	48.04	47.09	42.16	43.96	42.63	33.76	37.52
ILL.nagBA-BSU35020.1~729	31.9	31.34	31.71	50.74	49.68	50.23	41.84	40.53	40.65	26.76	24.52	25.28
ILL.nagBB-BSU02360.42~791	51.73	48.3	50.31	137.87	150.96	144.41	41.94	53.07	46.62	65.88	139.65	102.46
ILL.nagP-BSU02350.21~1916	51.3	48.57	50.16	144.82	153.32	149.09	45.62	55.51	49.81	63.27	124.1	93.32
ILL.nagP-BSU07700.15~1373	73.67	80.6	76.92	101.32	89.92	95.72	124.15	112.68	116.72	140.87	60.66	98.04
ILL.nap-BSU05440.12~914	61.39	74.1	67.2	51.67	43.69	47.74	42.13	67.15	53.79	46.31	34.78	39.75
ILL.narG-BSU37280.1~3687	0.34	0.24	0.3	0.38	0.3	0.34	0.23	0.24	0.24	0.18	0.57	0.38
ILL.narH-BSU37270.1~1464	0.19	0.47	0.31	0.46	0.41	0.43	0.2	0.49	0.34	0.11	0.55	0.34
ILL.narI-BSU37250.1~672	0.81	0.86	0.84	1.13	1.15	1.14	0.48	1.28	0.87	0.49	1.77	1.13
ILL.narJ-BSU37260.1~555	0.44	0.55	0.49	0.56	0.82	0.69	0.39	0.39	0.38	0.27	0.5	0.38
ILL.narK-BSU37320.89~1276	1.24	2.01	1.58	3.38	3.17	3.28	1.51	2.39	1.92	2.31	6.4	4.36
ILL.nasA-BSU03330.10~1215	5.62	6.47	6.01	5.01	6.03	5.52	4.29	5.81	4.95	4.01	5.62	4.77
ILL.nasB-BSU03320.23~2338	0.51	0.4	0.46	0.41	0.44	0.42	0.15	0.22	0.18	0.24	0.1	0.16
ILL.nasC-BSU03310.4~2136	0.24	0.16	0.17	0.33	0.6	0.46	0.17	0.2	0.19	0.14	0.12	0.13
ILL.nasD-BSU03300.1~2418	1.05	1.1	1.08	1.64	1.6	1.62	1.17	0.83	0.99	0.84	0.65	0.73
ILL.nasE-BSU03290.1~321	37.03	43.57	40.03	55.52	69.61	62.52	60.19	42.79	51	24.63	27.5	25.77
ILL.nasF-BSU03280.1~1452	23.59	27.83	25.54	61.55	77.5	69.47	20.01	26.57	23	25.69	24.65	24.76
ILL.natA-BSU02750.12~752	16.35	18.22	17.16	10.74	10.63	10.69	6.21	10.27	8.09	1.15	4.84	3.07
ILL.natA-BSU09890.11~907	41.35	46.25	43.63	16.38	14.9	15.65	38.97	51.13	44.44	7.66	22.24	14.99
ILL.natB-BSU02760.1~1161	14.52	14.02	14.33	9.87	9.88	9.88	5.17	8.69	6.85	1.1	3.84	2.48
ILL.natB-BSU09900.1~1260	54.99	70.88	62.21	28	24.09	26.08	62.64	71.68	66.19	15.99	31.78	23.81
ILL.natK-BSU02730.1~957	20.23	23.46	21.72	17.14	15.2	16.19	20.9	22.89	21.62	6.96	9.06	7.95
ILL.natR-BSU02740.12~713	21.95	22.27	22.14	19.83	16.76	18.32	23.43	23.03	23.22	11.27	11.2	11.11
ILL.ndh-BSU12290.40~1218	887.89	985.16	932.44	825.89	1029.26	926.91	855.97	1109.32	969.07	183.62	502.74	343.92
ILL.ndhF-BSU01830.1~1518	3.13	1.64	2.47	2.68	2.93	2.81	0.96	2.68	1.8	7.24	28.56	17.99
ILL.ndk-BSU22730.1~450	1007.26	1077.83	1039.12	719.64	645.46	683.24	808.87	1151.44	972.6	605.88	637.17	614.83
ILL.ndoA-BSU04660.1~351	1021.81	1119.52	1067.57	787.95	760.04	774.49	559.76	888.53	715.08	563.28	715.84	633.85
ILL.nfrA-BSU38110.4~753	91.83	100.54	95.91	27.37	23.61	25.52	63.15	86.4	73.76	54.19	70.77	62.04
ILL.nhaC-BSU09680.127~1488	38.2	48.29	42.79	11.35	13.32	12.33	37.35	73.31	54.51	19.59	72.68	46.33
ILL.nhaK-BSU33420.208~2220	16.7	21.73	18.98	14.76	13.33	14.06	18.32	22.21	19.97	9.16	38.92	24.18
ILL.nhaX-BSU09690.21~521	0	0.4	0.18	0.7	0.36	0.53	1.59	0.85	1.13	52.44	1.64	24.98
ILL.nifS-BSU27880.25~1212	7.44	8.18	7.79	6.02	7.49	6.75	6.84	10.04	8.31	7.86	9.48	8.57
ILL.nin-BSU03420.2~400	113.96	128.02	120.36	128.43	113.18	120.94	91.86	106.09	100.18	41.09	55.57	47.55
ILL.noc-BSU40990.10~861	214.99	240.84	226.85	214.57	254.86	234.61	148.11	237.53	189.43	39.38	114.62	76.99
ILL.nosA-BSU07630.16~1107	21.06	28.39	24.36	33.76	38.89	36.31	10.62	21.5	15.88	8.43	14.59	11.48
ILL.nprB-BSU11100.19~1635	2.12	1.92	2.04	1.82	1.45	1.64	1.17	2.4	1.76	2.01	3.23	2.6
ILL.nprE-BSU14700.13~1578	18.83	15.76	17.49	9.68	7.53	8.62	12.15	11.07	11.42	17.2	22.09	19.43
ILL.nrdE-BSU17380.1~2103	132.65	146.53	139.11	198.08	253.47	225.58	59.25	182.6	119.11	32.52	179.3	106.79
ILL.nrdEB-BSU20060.1~3507	0.39	0.3	0.35	0.41	0.49	0.45	0.16	0.37	0.26	0.19	0.35	0.27
ILL.nrdF-BSU17390.18~1007	171.2	216	191.57	251.82	350.24	300.64	106.63	243.67	172.35	32.83	191.07	112.91
ILL.nrdF-BSU20040.1~1798	0.9	0.55	0.76	0.5	0.61	0.56	0.29	0.91	0.59	0.34	0.66	0.51
ILL.nrdI-BSU17370.9~401	149.24	157.72	153.29	208.87	249.15	228.9	48.06	202.8	122.9	44.43	214.27	130.04
ILL.nrdI-BSU20070.1~390	0	0	0	0	0.13	0.07	0.13	0	0.06	0	0.14	0.07
ILL.nrdR-BSU29000.162~620	78.45	90.32	83.67	162.93	129.23	146.32	80.75	115.46	96.59	273.56	238.09	248.8
ILL.nrnA-BSU29250.1~942	106.3	127.2	115.86	197.28	158.42	178.14	92.23	152.36	119.8	63.12	79.77	70.7
ILL.nsrR-BSU09380.16~456	74.33	102.12	86.9	101.2	114.61	107.88	57.22	81.24	68.2	37.81	43.53	40.21
ILL.ntdA-BSU10550.104~1429	1.11	0.78	0.96	1.07	1.51	1.29	0.1	0.78	0.44	0.49	1.17	0.83
ILL.ntdB-BSU10540.1~849	1.76	2.29	2	2.73	2.88	2.81	0.45	1.22	0.82	0.67	1.69	1.18
ILL.ntdC-BSU10530.1~1053	3.05	3.21	3.13	4.35	4.69	4.52	1.03	2.62	1.79	1.77	2.92	2.33
ILL.nth-BSU22340.1~660	92.7	112.66	101.82	700.6	656.86	679.26	119.24	194.15	154.47	204.38	381.9	292.16
ILL.nucA-BSU03430.28~471	131.83	155.87	142.8	124.4	112.21	118.43	93.55	119.36	104.21	34.95	62.96	48.69
ILL.nucB-BSU25750.1~411	2.82	2.01	2.46	2.29	3.01	2.65	0.84	4.28	2.51	3.38	7.32	5.45
ILL.nudF-BSU23610.28~585	47.69	57.08	51.99	82.27	82.88	82.61	77.04	60.06	67.12	102.24	113.29	106.61
ILL.nupC-BSU39410.75~1256	149.14	122.79	137.66	107.94	105.45	106.75	149.48	180.1	162.43	129.25	100.32	112.67
ILL.nusA-BSU16600.35~1150	2805.01	3497.15	3120.37	32.7	35.14	33.92	2780.14	4325.19	3500.02	29.75	24.24	26.53
ILL.nusB-BSU24320.260~655	278.02	307.21	291.62	287.68	340.9	314.15	189.2	395.53	287.55	125.18	206.68	164.99
ILL.nusG-BSU01010.171~704	324.68	400.02	359.05	597.02	636.19	616.66	108.04	305.49	203.42	72.22	124.48	97.81
ILL.oatA-BSU27140.86~1990	4.14	3.81	4	4.57	5.08	4.82	2.5	3.84	3.13	2.34	7.18	4.77
ILL.obgE-BSU27920.34~1320	115.55	167.88	139.2	202.45	296.83	249.26	269.06	426.55	343.18	126.47	525.63	328.12
ILL.odhB-BSU19360.16~1269	1383.83	1284	1339.18	1800.67	1670.95	1737.24	1056.93	1234.26	1137.17	769.55	350.86	545.16
ILL.ogt-BSU13540.1~498	19.88	29.06	24.02	42.71	38.18	40.49	23.85	36.62	29.59	34.73	41.12	37.31
ILL.ohrA-BSU13140.6~431	27.8	40.82	33.68	72.71	74.28	73.52	40.01	57.07	47.87	33.18	138.93	86.41
ILL.ohrB-BSU13160.59~469	1.47	2.96	2.14	7.24	7.6	7.42	4.47	4.57	4.46	121.94	26.89	72.04
ILL.ohrR-BSU13150.16~459	31.26	35.8	33.3	24.46	26.54	25.5	38.1	43.85	40.36	34.64	45.01	39.6
ILL.oppA-BSU11430.137~1774	87.21	121.36	102.66	301.63	255.93	279.14	32.93	19.56	25.89	83.32	13.29	46.45
ILL.oppB-BSU11440.108~1043	19.49	23.29	21.23	66.8	41.53	54.32	6.43	3.99	5.14	14.67	3.04	8.55
ILL.oppC-BSU11450.1~918	24.5	31.44	27.66	84.72	53.32	69.22	6.4	5.28	5.8	12.76	3.99	8.1
ILL.oppD-BSU11460.5~1081	28.95	35.05	31.74	105.8	63.77	85.04	5.85	5.26	5.48	14.32	4.38	9.06
ILL.oppF-BSU11470.2~919	35.56	42.57	38.77	127.16	89.24	108.44	5.42	7.07	6.15	17.39	6.16	11.46
ILL.opuAA-BSU02980.22~1278	64.23	123.23	90.75	211.81	195.93	204.04	7.61	40.97	23.92	54.13	270.5	163.51
ILL.opuAB-BSU02990.2~850	79	120.74	97.49	245.23	244.92	245.18	13.27	47.8	30.33	62.71	287.21	178.53
ILL.opuAC-BSU03000.1~882	113.36	171.55	139.5	386.18	357.24	372.03	23.46	63.04	42.5	80.67	347.34	215.16
ILL.opuBA-BSU33730.53~1198	2.58	4.36	3.33	9.33	9.43	9.38	0.37	3.05	1.74	1.62	9.05	5.46
ILL.opuBB-BSU33720.10~663	2.71	3.66	3.14	10.17	7.52	8.86	0.6	2.38	1.46	1.87	5.28	3.58
ILL.opuBC-BSU33710.1~921	3.45	5.06	4.18	12.11	9.83	10.98	0.95	4.38	2.62	1.24	8.94	5.13
ILL.opuBD-BSU33700.11~691	4.85	6.23	5.48	13.54	10.34	11.97	1.76	4.03	2.85	1.96	9.85	5.94
ILL.opuCA-BSU33830.29~1171	16.69	21.08	18.64	110.18	132.56	121.3	9.46	13.03	11.08	54.61	62.11	57.6
ILL.opuCB-BSU33820.23~676	11.17	18.49	14.47	114.86	133.62	124.2	10.14	13.84	11.67	32.16	39.22	35.23
ILL.opuCC-BSU33810.1~912	14.07	18.75	16.19	116.75	145.39	130.97	9.17	13	10.92	21.67	36.61	28.96
ILL.opuCD-BSU33800.18~707	16.13	24.62	19.96	153.02	177.21	165.06	13.06	17.18	14.9	31.88	38.66	34.88
ILL.opuD-BSU30070.1~1539	46.84	51.57	49.04	52.97	52.65	52.83	40.26	60.98	49.89	21.75	62.64	42.26
ILL.opuE-BSU06660.109~1587	5.62	10.78	7.94	25.03	27.12	26.07	1.57	9.31	5.37	1.94	33.45	17.98
ILL.oxdC-BSU33240.13~1170	1.99	2.32	2.14	3.22	2.19	2.71	2.52	2.25	2.35	1.27	1.53	1.38
ILL.pabA-BSU00750.14~598	70.88	71.92	71.42	114.38	111.86	113.18	68.67	60.35	63.36	30.55	127.49	79.36
ILL.pabB-BSU00740.79~1491	33.35	30.19	32.01	56.11	52.46	54.33	28.91	30.32	29.22	26.47	151.97	90.11
ILL.pabC-BSU00760.1~882	46.65	45.89	46.38	102.53	97.81	100.24	45.09	50.75	47.24	23.88	107.47	66.32
ILL.padC-BSU34400.23~508	5	7.14	5.97	7.12	6.81	6.97	2.94	3.09	2.98	3.9	4.62	4.21
ILL.padR-BSU08340.61~609	58.56	64.11	61.16	80.35	66.72	73.64	42.04	63.32	51.45	43.51	37.71	39.96
ILL.paiA-BSU32150.128~646	6.25	7.39	6.77	6.81	10.31	8.55	28.04	67.79	47.01	212.89	412.88	311.06
ILL.paiB-BSU32140.1~624	14.34	15.92	15.08	13.66	15.43	14.54	45.96	95.8	69.78	267.08	515.18	389.65
ILL.panB-BSU22430.120~953	233.43	274.82	252.17	338.85	402.97	370.73	247.03	303.11	271.9	108.18	199.88	153.75
ILL.panC-BSU22420.1~861	240.63	293.02	263.23	371.51	426.04	398.66	266.64	309.48	284.94	86.65	190.31	138.83
ILL.panD-BSU22410.2~385	166.45	203.7	182.25	272.51	307.75	290.07	215.3	237.49	219.14	89.05	156.28	121.02
ILL.parA-BSU40970.30~791	136.45	147.38	141.62	140.95	126.57	133.89	165.48	115.44	138.71	65.88	62.28	63.15
ILL.parB-BSU40960.1~849	157.66	179.9	167.77	135.71	139.41	137.61	134.7	131.47	133.29	49.34	63.21	56.4
ILL.parC-BSU18100.4~2424	82.73	82.99	83.02	162.91	162.37	162.71	52.05	89.3	69.63	39.78	74.06	56.68
ILL.parE-BSU18090.264~2231	63.58	66.5	65.01	113	102.77	107.99	38.14	65.16	50.89	38.83	68.24	53.24
ILL.patA-BSU14000.1~1182	161.03	185.88	172.46	384.09	369.33	376.95	117.92	203.31	157.9	192.65	649.04	422.17
ILL.patB-BSU31440.57~1220	64.44	75.27	69.4	31.55	23.52	27.59	59.52	77	67.21	23.04	30	26.22
ILL.pbpA-BSU25000.40~2190	134.68	158.27	145.51	138.8	156.63	147.68	106.85	216.08	159.09	104.84	220.32	162.13
ILL.pbpB-BSU15160.1~2151	119.95	130.01	124.66	339.89	406.28	372.9	71.41	181.11	124.43	194.85	205.74	197.41
ILL.pbpC-BSU04140.151~2157	172.86	207.19	188.56	121.44	148.88	135.08	90.13	149.26	118.01	19.48	58.1	38.9
ILL.pbpD-BSU31490.1~1875	91.89	105.56	98.2	113.36	125.62	119.48	75.77	113.74	93.35	44.68	54.14	48.85
ILL.pbpE-BSU34440.6~1361	24.48	29.29	26.68	35.18	41.11	38.13	4.71	1.68	3.15	1.19	1.52	1.34
ILL.pbpF-BSU10110.1~2145	13.02	14.44	13.68	10.47	12.89	11.67	7.07	11.51	9.15	3.63	12.51	8.1
ILL.pbpG-BSU37510.1~2076	0.58	0.62	0.6	0.45	0.46	0.46	0.35	0.35	0.34	0.33	0.49	0.4
ILL.pbpH-BSU13980.87~2144	43.84	40.17	42.29	45.98	51.37	48.67	17.87	27.66	22.43	2.1	5.16	3.62
ILL.pbpI-BSU27310.40~1794	6.81	8.21	7.45	11.78	15.21	13.48	3.7	9.77	6.63	3.41	48.94	26.54
ILL.pbpX-BSU16950.28~1203	102.85	101.54	102.46	100.86	100.35	100.65	28.11	91.1	58.69	138.36	305.1	221.24
ILL.pbuE-BSU05800.1~1167	89.82	111.38	99.65	14.8	18.4	16.59	201.53	176.31	186.27	14.27	91.16	53.19
ILL.pbuG-BSU06370.135~1457	141.38	181.57	159.61	102.24	64.52	83.61	113.81	336.05	221.77	18.24	112.65	66.1
ILL.pbuO-BSU29990.88~1386	68.14	86.34	76.42	19.14	20.51	19.83	29.5	99.45	63.49	1.68	6.15	3.93
ILL.pbuX-BSU22060.1~1317	23.02	26.19	24.49	3.56	3.54	3.55	19.96	57.59	38.17	6.65	17.73	12.19
ILL.pckA-BSU30560.27~1610	51.09	64.03	56.95	37.98	48.78	43.35	32.23	77.75	54.13	1847.41	10.17	884.96
ILL.pcp-BSU02650.1~648	11.65	13.25	12.36	14.22	11.38	12.82	11.94	9.8	10.67	12.16	12.4	12.11
ILL.pcrA-BSU06610.1~2220	55.73	54.7	55.39	52.42	56.7	54.56	31.89	35.59	33.24	13.02	36.71	24.9
ILL.pcrB-BSU06600.23~709	36.53	48.68	41.98	42.57	42.83	42.72	25.47	29.15	27.22	12.83	26.89	19.91
ILL.pdaA-BSU07980.31~822	9.43	11.98	10.59	20.56	19.24	19.91	9.74	29.37	19.26	27.05	52.46	39.59
ILL.pdeH-BSU31740.26~1255	68.05	71.47	69.72	86.69	77.71	82.28	67.97	81.05	73.56	56.67	62.52	58.97
ILL.pdhA-BSU14580.208~1323	1942.48	2043.95	1991.15	1196.62	1339.02	1267.62	1132.72	1819.35	1452.31	355.55	637.59	493.75
ILL.pdhB-BSU14590.1~978	1549.6	1598.37	1574.15	1216.44	1203.57	1210.59	1091.64	1440.69	1243.64	386.12	512.76	444.69
ILL.pdhC-BSU14600.1~1329	1837.94	2013.27	1919.64	1774.25	1906.24	1840.35	1251.83	1767.86	1484.34	470.5	713.92	587.43
ILL.pdhD-BSU14610.1~1413	1555.04	1836.15	1683.03	1691.64	1595.15	1644.61	1241.29	1465.97	1331.39	398.73	445.88	416.75
ILL.pdp-BSU39400.30~1331	179.44	164.56	173.15	138.02	143.45	140.77	194.85	232.26	210.4	181.37	113.09	144.02
ILL.pel-BSU07560.41~1303	164.78	207.87	184.39	13.96	18.84	16.38	129.7	157.36	141.21	48.39	57.7	52.39
ILL.pelB-BSU18650.1~1038	0.86	0.9	0.88	1.38	1.98	1.67	0.61	1.38	0.98	1.58	3.11	2.33
ILL.pelC-BSU34950.141~806	12.39	13.76	13.03	18.94	19.45	19.2	18.93	28.02	23.13	20.28	17.64	18.66
ILL.penP-BSU18800.1~921	94.27	92.98	92.96	137.14	106.55	122.06	33.1	59.9	45.92	65.63	61.07	61.71
ILL.pepF-BSU11540.1~2013	67.72	80.06	73.38	51.49	46.45	49.01	41.15	55.22	47.48	45.77	57.93	51.3
ILL.pepT-BSU38920.1~1233	82.83	86.92	84.81	47.9	36.52	42.29	50.96	55.74	52.38	86.09	44.9	63.89
ILL.perR-BSU08730.1~438	382.13	494.86	433.31	468.26	499.31	483.83	550.56	563.08	551.25	969.35	507.99	722.95
ILL.pfkA-BSU29190.184~1143	545.63	611.78	576.34	307.85	332.98	320.42	577.14	833.29	694.69	165.42	388.8	276.72
ILL.pgcA-BSU09310.1~1746	155.77	183.57	168.53	146.42	130.16	138.43	116.76	164.52	138.58	177.77	261.11	217.63
ILL.pgcM-BSU34550.1~681	7.27	4.64	6.11	7.23	8.6	7.91	4.72	5.83	5.2	3.03	5.89	4.44
ILL.pgdS-BSU35860.14~1255	109.03	146.62	126.06	660.11	634.07	647.5	24.15	27.65	25.51	3.51	3.17	3.28
ILL.pgi-BSU31350.11~1363	717.17	728.09	723.22	505.35	337.53	422.5	447	504.77	465.18	491.27	1079.18	782.17
ILL.pgk-BSU33930.317~1501	914.99	920.25	918.84	692.68	527.97	611.45	980.16	1176.01	1062.6	98.78	272.74	185.93
ILL.pgm-BSU33910.1~1536	863.66	900.01	881.66	661.72	503.12	583.5	1062.21	1071.84	1052.84	69.72	222.95	146.73
ILL.pgsA-BSU16920.50~631	93.17	104.3	98.27	289.12	304.79	297	88.96	127.44	107.79	103.87	178.88	140.79
ILL.pgsA-BSU35880.19~1161	3.92	3.87	3.91	4.14	5.08	4.61	2.51	3.97	3.2	2.12	3.27	2.68
ILL.pgsB-BSU35900.74~1255	2.89	2.38	2.67	2.73	2.61	2.67	1.51	1.87	1.67	3.01	1.88	2.39
ILL.pgsC-BSU35890.15~464	1.98	2.58	2.25	3.78	2.82	3.31	1.37	2.81	2.1	1.58	1.71	1.63
ILL.pgsE-BSU35870.1~168	28.76	6.42	18.94	21.91	27.22	24.54	12.92	19.29	16.58	21.56	10.28	15.99
ILL.pheA-BSU27900.1~858	52.15	72.01	61.14	148.94	171.82	160.33	93.62	103.2	96.78	38.91	92.99	65.86
ILL.pheB-BSU27910.51~494	71.62	93.92	81.65	182.57	250.23	216.14	84.92	141.79	110.94	54.96	147.09	100.93
ILL.pheS-BSU28640.298~1332	126.77	130.57	128.19	73.43	68.15	70.85	107.99	162.98	132.66	58.75	165.64	112.09
ILL.pheT-BSU28630.1~2415	106.33	114.09	110.02	33.06	36.47	34.76	108.44	130.58	117.88	36.84	117.26	77.35
ILL.phoA-BSU09410.106~1491	5.65	5.73	5.7	16.96	15.47	16.23	2.45	6.49	4.41	7.1	12.76	9.88
ILL.phoB-BSU05740.264~1652	2.64	2.83	2.73	1.96	2.43	2.19	0.91	2.07	1.47	1.35	2.48	1.91
ILL.phoD-BSU02620.19~1770	0.51	0.73	0.61	1.65	1.93	1.79	1.2	1.46	1.31	2.15	5.47	3.81
ILL.phoE-BSU10340.11~592	52.29	61.4	56.47	50.37	46.03	48.24	33.07	51.54	41.29	71.55	50.26	59.79
ILL.phoH-BSU25340.1~960	295.21	305.52	300.41	240.45	214.42	227.67	147.53	225.6	184.05	259.28	293.76	273.88
ILL.phoP-BSU29110.57~779	49.84	41.46	46.12	75.97	74.33	75.19	54.31	36.89	44.59	108.95	20.78	62.28
ILL.phoR-BSU29100.1~1740	51.43	55.22	53.23	84.66	80.85	82.81	45.3	47.29	45.68	110.92	20.2	63.15
ILL.phrA-BSU12440.1~135	31.63	57.9	42.34	122.32	57.65	90.15	72.17	16.28	63.25	910.24	33.75	455.04
ILL.phrC-BSU03780.1~123	127.29	214.93	158.87	284.27	76.11	180.51	400.27	156.79	246.6	390.83	170.58	275.93
ILL.phrE-BSU25840.1~135	65.01	89.08	75.82	108.05	84.41	96.3	115.47	93.02	102.9	31.73	13.5	23.23
ILL.phrF-BSU37470.1~120	347.17	436.55	387.56	720.7	341.54	531.63	525.21	198.4	391.99	510.78	134.79	337.54
ILL.phrG-BSU40310.1~117	0	3.16	1.4	0	0	0	2.25	0	0	0	0	0
ILL.phrH-BSU06839.1~174	7.82	8.57	8.17	20.22	9.72	15.03	1.77	7.54	4.55	9.91	11.94	10.72
ILL.phrI-BSU05020.1~120	40.15	41.86	41	85.6	77.75	81.68	19.22	6.4	8.91	7.94	12.25	9.97
ILL.phrK-BSU18920.1~123	22.33	36.76	28.77	140.83	44.62	92.87	44.47	27.14	28.87	12.53	0	6.73
ILL.phy-BSU19800.6~1154	0.46	0.8	0.61	0.66	0.91	0.78	0.51	1.06	0.77	0.66	1.41	1.03
ILL.pit-BSU12840.1~1002	491.14	554.24	520.18	378.22	398.72	388.53	290.99	647.41	462.96	102.21	204.3	153.29
ILL.pksA-BSU17080.1~618	25.19	27.82	26.42	45.3	43.88	44.62	28.42	41.07	34.23	38.75	38.08	37.84
ILL.pksB-BSU17090.54~731	6.11	4.54	5.42	16.59	16.71	16.65	2.61	4.63	3.56	7.59	6.84	7.1
ILL.pksC-BSU17100.282~1148	10.58	9.54	10.14	29.57	24.44	27.04	8.94	7.86	8.3	31.93	10.36	20.54
ILL.pksD-BSU17110.504~1478	2.72	3.08	2.88	8.21	7.31	7.77	0.97	2.53	1.73	8.48	5.8	7
ILL.pksE-BSU17120.1~2304	0.7	1.39	1.01	3.57	2.85	3.22	0.09	0.75	0.41	3.08	2.83	2.9
ILL.pksF-BSU17140.1~1248	0.08	0.28	0.17	1.54	1.08	1.31	0.03	0.03	0.03	0.4	0.35	0.37
ILL.pksG-BSU17150.1~1263	0.11	0.14	0.12	2.18	0.61	1.4	0.09	0.12	0.1	0.3	0.28	0.29
ILL.pksH-BSU17160.1~780	0.18	0.4	0.28	2.16	0.65	1.42	0.29	0.19	0.24	0.38	0.41	0.39
ILL.pksI-BSU17170.1~750	0.28	0.18	0.24	1.33	0.78	1.06	0.1	0.15	0.12	0.34	0.27	0.3
ILL.pksJ-BSU17180.1~15132	0.41	0.53	0.46	2.07	1.45	1.76	0.24	0.19	0.21	0.13	0.36	0.25
ILL.pksL-BSU17190.1~13617	1.01	0.97	1	3.53	3.05	3.29	0.5	0.48	0.48	0.2	0.45	0.32
ILL.pksM-BSU17200.1~12789	1.47	1.37	1.43	3.72	3.2	3.46	0.8	0.93	0.85	0.12	0.51	0.32
ILL.pksN-BSU17210.14~16480	0.96	1.1	1.03	5.5	4.66	5.09	0.51	0.51	0.5	0.21	0.39	0.3
ILL.pksR-BSU17220.15~7646	2.06	2.31	2.18	7.97	8.34	8.16	0.94	1.29	1.1	0.38	1.06	0.72
ILL.pksS-BSU17230.82~1299	53.39	50.42	52.18	57.26	42.81	50.13	27.15	37.05	31.63	59.18	38.28	47.7
ILL.plsC-BSU09540.25~624	155.25	285.26	212.93	107.07	171.58	139.04	119.99	284.34	198.22	92.65	94.11	91.64
ILL.plsX-BSU15890.1~1002	159.24	304.78	224.58	214.84	359.37	286.47	112.32	362.41	233.3	59.08	142.03	100.46
ILL.pnbA-BSU34390.13~1482	10.02	12.14	10.99	7.7	7.55	7.63	9.72	9.49	9.47	4.19	3.47	3.76
ILL.pncA-BSU31760.1~552	129.24	170.24	147.75	296.59	277.97	287.51	90.58	117.23	102.52	108.58	81.63	93.76
ILL.pnpA-BSU16690.173~2290	456.85	599.67	521.68	954.77	1061.98	1008.25	429.48	1031.16	719.5	638.7	1404.11	1019.24
ILL.polA-BSU29090.47~2689	42.17	44.67	43.38	53.56	57.7	55.63	45.32	48.16	46.11	29.51	40.19	34.52
ILL.polC-BSU16580.109~4422	72.45	82.01	76.87	570.11	626.7	598.37	112.78	181.71	145.13	91.18	300.89	196.74
ILL.ponA-BSU22320.1~2745	150.54	157.1	153.78	142.08	179.61	160.72	89.21	147.75	116.67	52.84	134.31	93.56
ILL.ppaC-BSU40550.26~955	697.82	721.24	709.74	817.09	747.62	783.06	588.8	769.41	669.32	247.17	328.62	285.15
ILL.ppiB-BSU23360.39~470	508	655.03	574.78	446.11	363.34	405.35	602.49	702.67	643.94	432.69	434.78	427.94
ILL.ppnK-BSU11610.1~801	104.91	102.17	103.83	75.88	55.37	65.76	70.97	66.7	67.07	33.96	38.19	35.74
ILL.ppnK-BSU29540.58~861	113.71	79.79	98.73	146.53	135.08	140.92	57.54	71.54	63.59	153.74	54.64	101.14
ILL.pps-BSU18830.27~2627	13.42	15.22	14.25	6.92	8.05	7.48	6.08	10.9	8.36	50.06	219.09	135.45
ILL.ppsA-BSU18340.84~7769	1.41	1.95	1.65	3.92	3.09	3.51	0.52	0.47	0.49	4.71	1.68	3.09
ILL.ppsB-BSU18330.1~7683	1.24	1.53	1.37	3.63	2.68	3.16	0.35	0.38	0.36	0.73	0.83	0.77
ILL.ppsC-BSU18320.17~7684	1.57	1.85	1.7	3.99	3.51	3.75	0.63	0.89	0.76	0.64	0.86	0.75
ILL.ppsD-BSU18310.1~10812	1.92	2.15	2.03	4.84	4.65	4.75	0.87	1.08	0.96	0.52	1.2	0.86
ILL.ppsE-BSU18300.1~3840	2.22	2.33	2.27	5.6	4.83	5.22	1.32	1.37	1.32	0.4	1.2	0.8
ILL.prfA-BSU37010.25~1095	357.49	433	391.96	228.98	219.04	224.16	318.54	339.89	329.03	171.2	231.28	203.07
ILL.prfB-BSU35290.10~1111	294.48	318.56	305.67	334.16	420.02	376.81	215.85	352.39	279.07	110.71	141.36	124.63
ILL.priA-BSU15710.1~2418	27.82	28.23	28.06	187.92	188.54	188.31	44.02	67.58	54.98	66.76	110.91	88.28
ILL.prkA-BSU08970.1~1896	1.04	0.97	1.01	0.9	1.07	0.98	1.15	1.91	1.51	0.74	5.54	3.17
ILL.prkC-BSU15770.1~1947	101.77	94.97	98.94	215.85	183.11	199.74	97.25	138.11	115.99	23.6	55.07	39.28
ILL.prmA-BSU25450.1~936	163.86	211.37	185.45	132.22	180.16	156.01	91.53	238.44	163.03	42.41	189.65	116.78
ILL.prmC-BSU37000.1~867	57.3	69.84	62.94	140.92	170.18	155.46	63.06	174.95	118.62	95.29	213.07	155.33
ILL.proA-BSU13130.12~1259	113.96	124.51	118.84	14.01	20.51	17.23	39.51	59.75	48.94	18.76	114.53	67.27
ILL.proB-BSU13120.53~1150	68.88	65.27	67.41	8.98	11.77	10.36	18.1	37.89	27.63	9.48	86.22	48.42
ILL.proG-BSU12910.10~828	15.05	20.91	17.7	21.74	22.35	22.05	13.41	17.56	15.19	6.96	10.14	8.45
ILL.proH-BSU18480.1~894	27.66	32.74	29.99	16.3	10.31	13.35	5.36	19.14	12	73.28	328.19	201.97
ILL.proI-BSU23800.267~1103	21.51	28.11	24.51	222.11	227.46	224.85	50.67	110.98	79.59	80.56	167.61	123.73
ILL.proJ-BSU18470.1~1116	29.84	34.03	31.78	15.66	12.06	13.89	5.07	21.84	13.24	80.17	324.89	203.52
ILL.proS-BSU16570.33~1727	276.13	299.36	286.79	607.16	551.2	579.72	402.9	619.24	502.21	145.92	480.01	313.84
ILL.prpB-BSU24120.18~923	6.24	6.28	6.27	11.26	10.59	10.94	7.87	7.27	7.46	11.21	9.46	10.14
ILL.prpC-BSU15760.1~765	101.85	94.15	98.61	248.28	218.95	233.87	105.04	124.44	112.42	33.28	64.68	48.75
ILL.prpD-BSU24130.15~1433	1.22	1.25	1.24	3.37	3.41	3.39	1.96	2.65	2.27	2.8	4.87	3.81
ILL.prs-BSU00510.1~954	448.72	493.2	469.52	260.87	268	264.51	255.07	357.47	302.24	65.26	283.35	175.35
ILL.prsA-BSU09950.3~881	649.78	685.51	665.73	563.75	558.39	561.35	384.99	700.65	533.5	491.33	690.88	585.22
ILL.prsW-BSU22940.1~657	51.9	74.48	62.07	79.5	105.17	92.24	51.74	97.61	73.84	99.36	227.47	163.08
ILL.psd-BSU02290.1~792	110.08	128.16	118.39	96.11	108.34	102.21	66.6	152.91	107.97	22.76	78.49	50.77
ILL.pspA-BSU06180.31~714	53.27	71	61.31	70.33	72.47	71.42	23.65	10.89	17.07	2.84	5.16	3.98
ILL.pssA-BSU02270.1~534	107.46	130.58	118.02	75.6	101.06	88.23	70.48	133.28	102.46	22.24	65.49	44.25
ILL.pstA-BSU24970.1~885	0.37	0.67	0.51	2.47	1.83	2.15	0.65	0.83	0.75	1.7	7.59	4.67
ILL.pstBA-BSU24960.1~810	0.42	0.74	0.56	3.24	2.85	3.05	0.58	1.46	1	1.77	8.01	4.92
ILL.pstBB-BSU24950.11~793	0.54	1.13	0.81	3.53	4.3	3.91	0.85	1.67	1.24	3.05	8.65	5.86
ILL.pstC-BSU24980.1~930	0.27	0.34	0.3	2.37	1.77	2.07	0.45	1.32	0.87	2.54	8.13	5.35
ILL.pstS-BSU24990.106~1008	0.53	0.58	0.55	3.18	2.48	2.84	0.55	1.64	1.08	3.58	12.13	7.88
ILL.ptb-BSU24090.10~909	51.67	52.83	52.25	42.92	35.84	39.44	135.17	60.79	95.53	81.34	57.94	67.83
ILL.pth-BSU00530.107~673	99.55	107.14	103.15	144.68	137.75	141.31	72.63	133.76	103.83	54.01	168.85	112.21
ILL.ptkA-BSU36250.1~714	45.75	51.72	48.51	23.52	19.45	21.52	25.16	32.49	28.33	18.26	21.85	19.83
ILL.ptsG-BSU13890.229~2328	1624.25	1880.9	1742.25	483.29	1041.24	759.68	1449.76	1657.87	1523.93	153.3	1336.72	753.68
ILL.ptsH-BSU13900.6~272	3292.76	4121.13	3657.21	1356.07	2123.76	1736.51	2656.85	3886.18	3199.64	621.25	2227.9	1424.3
ILL.ptsI-BSU13910.1~1713	2618.37	3165.19	2868.35	1124.68	1559.49	1340.39	2385.66	2797.03	2557.91	513.46	1610.03	1064.87
ILL.pucA-BSU32510.57~1049	0.14	0.08	0.11	0.85	0.41	0.63	0	0.18	0.09	0.25	0.46	0.35
ILL.pucB-BSU32500.1~618	0.13	0.08	0.11	0.49	0.57	0.53	0.07	0	0.03	0.15	0.65	0.41
ILL.pucC-BSU32490.1~834	0.09	0.17	0.12	0.63	0.74	0.68	0.14	0.14	0.14	0.11	0.55	0.33
ILL.pucD-BSU32480.1~2238	0.56	0.74	0.64	1.31	1.47	1.39	0.2	0.51	0.35	0.21	0.57	0.39
ILL.pucE-BSU32470.1~522	0.72	1	0.85	1.48	2.75	2.11	0.75	0.17	0.46	0.67	0.91	0.78
ILL.pucG-BSU32520.16~1266	2.7	4.1	3.33	10.85	7.98	9.44	2.59	3.13	2.83	0.83	4.07	2.46
ILL.pucH-BSU32410.1~1341	3.08	4.04	3.51	2.54	4.13	3.33	2.68	3.37	2.98	1.55	3.58	2.56
ILL.pucI-BSU36470.181~1653	0.69	0.86	0.77	1.39	1.29	1.34	0.82	0.89	0.84	0.16	0.69	0.43
ILL.pucJ-BSU32430.96~1445	1.71	1.89	1.8	1.8	1.7	1.75	0.57	1.97	1.25	1.89	1.61	1.72
ILL.pucK-BSU32440.6~1298	1.15	1.26	1.2	1.04	0.86	0.95	0.39	0.73	0.55	0.84	1.45	1.14
ILL.pucL-BSU32450.13~1497	2.22	2.07	2.16	1.9	1.36	1.63	0.69	1.08	0.87	1.4	1.39	1.38
ILL.pucM-BSU32460.1~345	5.95	5.99	5.98	4.76	4.86	4.81	3.36	5.75	4.48	6.77	4.03	5.3
ILL.pucR-BSU32420.68~1663	4.98	4.43	4.74	6.31	5.64	5.98	1.81	3.47	2.62	4.17	3.65	3.83
ILL.pupG-BSU23490.1~816	470.2	533.29	499.39	381.81	437.39	409.49	578.22	818.95	689.39	258.15	452.49	353.42
ILL.purA-BSU40420.45~1337	431.04	577.55	497.39	147.93	170.99	159.41	317.59	533.43	419.25	19.14	49.31	34.23
ILL.purB-BSU06440.1~1296	65.81	67.72	66.8	42.05	38.95	40.53	25.32	85.01	54.31	11.48	21.89	16.61
ILL.purC-BSU06450.51~776	17.39	20.38	18.76	36.67	29.46	33.12	2.89	8.29	5.5	3.67	4.49	4.04
ILL.purD-BSU06530.11~1279	23.34	29.43	26.11	55.81	50.27	53.09	10.8	10.65	10.57	2.36	2.58	2.44
ILL.purE-BSU06420.141~629	37.16	41.68	38.45	26.21	17.94	22.12	12.59	51.82	31.63	11.03	15.16	12.94
ILL.purF-BSU06490.1~1431	19	22.7	20.69	46.9	37.62	42.33	7.04	6.64	6.76	2.6	2.57	2.55
ILL.purH-BSU06520.1~1539	19.56	21.92	20.65	49.54	42.69	46.17	6.88	7.02	6.83	1.36	1.84	1.57
ILL.purK-BSU06430.1~1143	52.76	56.56	54.54	32.89	28.07	30.52	14.57	57.52	35.51	12.11	19.89	15.89
ILL.purL-BSU06480.1~2229	16.27	17.8	16.96	35.55	27.02	31.34	4.29	5.79	4.97	2.22	2.14	2.15
ILL.purM-BSU06500.102~1142	14.51	15.7	15.07	38.36	33.11	35.78	5.01	4.98	4.92	1.34	1.74	1.53
ILL.purN-BSU06510.1~588	17.23	19.7	18.33	46.62	40.41	43.56	6.65	5.95	6.36	1.73	1.47	1.58
ILL.purQ-BSU06470.1~684	18.31	21.25	19.66	38.34	33.4	35.91	4.08	7.54	5.72	2.45	3.52	2.96
ILL.purR-BSU00470.1~858	174.14	219.73	194.81	157.88	178.81	168.31	96.17	268.22	179.25	174.06	933.89	557.95
ILL.purS-BSU06460.1~255	22.36	23.42	22.89	47.11	43.86	45.52	4.19	7.82	5.75	5.2	5.61	5.2
ILL.purT-BSU02230.15~1169	52.89	83.87	66.86	133.04	93.3	113.43	39.57	33.53	36.01	34.8	45.18	39.66
ILL.purU-BSU13110.1~903	173.52	221.28	193.7	348.61	384.26	366.41	139.05	292.98	211.37	270.17	615.79	441.54
ILL.pycA-BSU14860.1~3447	274.18	317.75	294.22	1449.57	1370.22	1410.92	490.01	783.37	627.43	395.19	541.25	463.82
ILL.pyk-BSU29180.23~1780	746.98	786.87	765.02	510.33	533.01	521.77	905.95	1079.81	978.73	329.01	557.78	440.94
ILL.pyrAA-BSU15510.1~1095	117.45	115.99	117.04	48.12	56.26	52.17	313.38	68.63	188.63	3.59	23.88	13.86
ILL.pyrB-BSU15490.31~945	98.63	90.65	95.25	28.23	28.44	28.35	155.54	82.88	117.34	4.48	45.48	25.38
ILL.pyrC-BSU15500.1~1287	104.47	98.28	101.92	37.94	43.24	40.58	211.11	67.31	137.46	3.84	29.8	16.99
ILL.pyrD-BSU15540.1~936	109.26	137.31	121.97	44.33	72.27	58.18	311.11	64.54	185	1.49	8.68	5.13
ILL.pyrE-BSU15560.1~651	128.93	190.37	156.58	47.96	85.88	66.75	299.4	105.49	198.88	2.2	10.17	6.22
ILL.pyrF-BSU15550.1~720	107.21	143.85	123.82	44.54	70.67	57.5	276.81	70.93	171.84	1.92	7.57	4.76
ILL.pyrG-BSU37150.131~1738	489.95	591.24	536.26	159.52	177.87	168.67	467.04	630.3	541.52	70.99	496.23	286.94
ILL.pyrH-BSU16510.146~868	832.54	882.87	856.75	735.62	789.27	762.49	556.95	1070.77	802.52	333.35	1073.23	705.35
ILL.pyrK-BSU15530.1~771	128.64	162.94	144.08	59.26	92.27	75.63	435.39	81.32	254.12	4.17	17.79	11.06
ILL.pyrP-BSU15480.53~1360	340.52	455.18	392.51	116.81	106.69	111.85	378.34	395.82	381.59	120.53	410.12	266.19
ILL.pyrR-BSU15470.27~572	673.65	945.63	796.6	300.95	306.76	303.96	359.63	1014.27	676.37	463.91	1148.07	805.11
ILL.qcrA-BSU22560.1~504	36.73	41.97	38.35	204.86	203.2	204.13	91.96	64.61	75.77	77.36	37.18	55.54
ILL.qcrB-BSU22550.2~676	47.26	52.55	49.54	267.06	244.62	256.07	97.85	67.26	84.67	81.61	42.59	61.55
ILL.qcrC-BSU22540.1~768	44.03	56.58	49.73	283.13	248.92	266.32	93.74	74.52	82.99	90.19	41.97	64.42
ILL.qodI-BSU39980.2~1015	1.1	1.49	1.28	4.6	4.73	4.67	1.29	2.62	1.88	0.08	0.5	0.29
ILL.qoxA-BSU38170.258~1223	786.83	972.4	871.45	629.59	567.43	599.09	483.77	687.66	577.15	174.94	272.81	222.25
ILL.qoxB-BSU38160.28~1977	871.57	1172.6	1008	820.85	792.11	806.97	636.81	795.94	703.59	161.13	286.56	222.71
ILL.qoxC-BSU38150.14~628	995.42	1292.53	1130.29	876.9	871.86	874.79	714.89	903.29	796.7	168.04	315.28	240.52
ILL.qoxD-BSU38140.2~376	1143.93	1566.12	1334.95	1087.55	1005.56	1047.46	1037.52	1105.69	1058.52	235.4	336.45	283.81
ILL.queA-BSU27720.1~1029	126.31	141.15	133.21	116.17	124.05	120.12	102.02	157.62	127.53	47.39	110.43	78.69
ILL.queC-BSU13720.130~789	41.7	60.21	50.06	39.95	55.5	47.66	73.31	143.43	106.62	42.3	306.16	175.95
ILL.queD-BSU13730.1~450	51.87	79.54	64.24	53.91	73.18	63.47	98.38	168.75	133.27	50.22	370.67	215.4
ILL.queE-BSU13740.1~732	67.52	91.58	78.42	67.08	99.34	83.07	120.32	219.22	167.1	60.53	483.64	274.76
ILL.racA-BSU37030.1~555	26.68	33.59	29.82	16.89	14.98	15.95	23.15	31.18	26.77	13.79	24.67	19.12
ILL.racE-BSU28390.1~819	160.74	201.42	179.16	249.49	250.31	250.01	192.65	289.28	236.74	239.71	235.03	233.74
ILL.racX-BSU34430.16~699	29.98	36.07	32.77	44.73	53.79	49.24	6.58	3.5	4.98	1.05	1.84	1.44
ILL.radA-BSU00870.88~1464	25.96	26.73	26.36	70.43	75.92	73.18	18.43	56.55	36.99	23.4	218.59	122.93
ILL.radC-BSU28040.1~696	67.52	77.1	71.26	37.54	42.18	39.86	35.97	69.04	51.18	39.22	182.43	111.88
ILL.rapA-BSU12430.21~1157	23.87	27.31	25.46	32.86	31.44	32.18	33.31	33.72	32.97	218.85	20.33	114.74
ILL.rapB-BSU36690.20~1153	76.01	77.08	76.64	135.56	132.9	134.3	56.14	77.84	66.02	50.44	111.03	80.52
ILL.rapC-BSU03770.1~1149	83.92	107.65	94.55	59.12	72.73	65.88	69.16	147.63	106.62	152.67	134.95	141.5
ILL.rapD-BSU36380.17~1081	40.01	31.26	36.18	23.83	27.59	25.7	19.07	23.15	20.77	12.99	15.27	13.95
ILL.rapE-BSU25830.1~1128	1.16	0.66	0.94	1.12	1.21	1.16	0.43	0.56	0.49	0.68	0.71	0.68
ILL.rapF-BSU37460.1~1146	46.97	57	51.55	110.81	111.56	111.23	48.84	41.8	44.22	166.75	55.45	107.53
ILL.rapG-BSU40300.1~1098	37.46	35.6	36.69	51.15	52.77	51.97	19.14	19.77	19.14	17.06	6.34	11.35
ILL.rapH-BSU06830.1~1131	14.7	16.03	15.33	20.08	17.89	19.01	4.28	8.19	6.13	11.31	10.68	10.76
ILL.rapI-BSU05010.50~1225	4.83	5.82	5.28	4.26	12.38	8.28	0.72	2.67	1.67	1.86	2.9	2.36
ILL.rapJ-BSU02820.6~1127	58.73	69.98	63.83	66.97	64.27	65.66	59.46	78.83	68.36	39.44	35.81	37.03
ILL.rapK-BSU18910.10~1125	9.38	10.31	9.81	14.87	22.54	18.68	3.22	3.01	3.07	2.91	2.16	2.49
ILL.rbfA-BSU16650.17~370	459.86	537.42	495.48	2236.37	2293.44	2265.6	683.17	881.72	808.37	1260.87	1264.29	1252.33
ILL.rbfK-BSU29300.1~693	0.33	0	0.19	0.66	0.86	0.76	0.06	0.06	0.06	0	0.25	0.13
ILL.rbgA-BSU16050.44~892	136.22	170.85	151.96	271.97	304.89	288.38	148.1	429.04	283.99	375.54	1074.88	726.05
ILL.rbsA-BSU35940.1~1482	186.13	67.87	133.6	27.98	36.04	31.98	653.3	324.46	481.61	752.25	56.14	387.1
ILL.rbsB-BSU35960.12~929	325.09	132.44	239.47	38.19	52.78	45.42	536.99	598.72	558.64	975.13	56.5	493.3
ILL.rbsC-BSU35950.1~969	217.74	89.11	160.5	28.62	44.71	36.6	567.86	408.39	482.65	828.22	52.25	417.76
ILL.rbsD-BSU35930.1~396	172.32	64.75	124.51	37.41	43.82	40.6	803.97	337.26	564.77	855.56	82.69	452.16
ILL.rbsK-BSU35920.1~882	250.01	127.83	195.32	64.72	73.27	68.98	1212.69	524.62	853.92	1260.46	156.79	678.35
ILL.rbsR-BSU35910.12~992	229.09	127.57	183.66	60.11	66.51	63.3	1417.04	542.77	958.68	1281.65	173.35	691.51
ILL.recA-BSU16940.1~1047	404.71	512.73	453.86	699.06	766.93	732.96	413.22	545.4	472.07	602.39	581.71	583.32
ILL.recF-BSU00040.1~1113	240.25	287.2	261.75	351.06	431.76	391.16	249.38	370.31	305.29	167.69	280.55	222.75
ILL.recG-BSU15870.1~2049	26.01	28.91	27.36	129.17	117.16	123.28	34.69	47.04	40.28	30.18	44.76	37.17
ILL.recJ-BSU27620.19~2379	144.84	163.28	153.3	90.47	105.31	97.86	115.04	211.95	161	45.08	160.96	103.5
ILL.recN-BSU24240.1~1731	69	89.45	78.29	311.47	361.93	336.58	89.83	148.09	117.29	89.68	149.04	118.63
ILL.recO-BSU25280.1~768	128.62	161.12	143.27	371.95	424.98	398.36	127.68	218.52	169.76	157.07	209.5	181.29
ILL.recQ-BSU23020.1~1491	30.99	31.14	31.12	82.97	98.43	90.66	24.07	31.34	27.27	22.16	51.63	36.86
ILL.recR-BSU00210.1~597	102.42	125.65	113.02	181.95	188.92	185.48	72.35	213.67	140.7	155.94	635.9	398.03
ILL.recU-BSU22310.7~627	88.86	94.96	91.77	68.82	93.52	81.08	47.32	84.6	64.37	33.19	110.17	71.88
ILL.recX-BSU08520.89~883	53.87	52.96	52.67	46.43	46.36	46.42	42.77	60.45	50.51	31.55	50.47	40.63
ILL.relA-BSU27600.1~2205	142.78	161.99	151.66	361.89	400.2	381.01	136	260.69	195.3	91.21	243.67	167.51
ILL.resA-BSU23150.1~540	101.88	125.12	112.48	82.45	62.5	72.61	89.72	114.64	100.71	35.45	72.68	53.87
ILL.resB-BSU23140.1~1629	82.46	93	87.33	71.43	61.35	66.47	67.89	85.01	75.32	25.51	48.05	36.63
ILL.resC-BSU23130.20~1195	68.94	76.51	72.46	69.4	61.4	65.47	65.09	68.42	65.85	21.87	35.04	28.27
ILL.resD-BSU23120.1~723	98.41	106.98	102.45	110.65	107.57	109.18	78.59	90.78	83.76	28.03	46.37	37.02
ILL.resE-BSU23110.1~1770	89.95	112.72	100.32	102.58	92.69	97.73	70.33	94.65	81.29	24.23	37.84	30.81
ILL.rex-BSU12280.252~674	683.66	745.16	712.46	591.45	707.71	649.25	605.24	845.94	714.97	130.07	380.56	255.55
ILL.rghRA-BSU33660.18~425	28.44	37.64	32.61	57.88	67.73	62.78	43.63	71.94	56.47	46.91	151.39	99.1
ILL.rghRB-BSU33670.1~420	18.77	19.62	19.19	36.4	40.1	38.25	22.33	37.3	29.4	20.12	75.69	48.05
ILL.rhgT-BSU07020.1~699	0.99	0.69	0.86	1.25	1.28	1.27	0.23	0.29	0.26	0.07	0.31	0.19
ILL.rho-BSU37080.407~1690	120.44	170.74	143.18	168.43	230.87	199.41	85.07	213.05	146.84	77.64	266.99	172.92
ILL.ribA-BSU23260.1~1197	35.59	48.33	41.36	49.35	47.33	48.37	26.87	77.38	51.32	46.29	67.16	56.25
ILL.ribC-BSU16670.19~969	76.63	78.34	77.53	135.57	122.54	129.18	73	115.08	93.28	80.84	180.77	130.89
ILL.ribD-BSU23280.130~1215	41.26	47.21	43.99	52.05	48.57	50.35	66.13	89.67	77.06	64.39	79.04	71.03
ILL.ribE-BSU23270.11~658	30.95	39.93	35.03	31.18	35.75	33.46	22.7	63.98	42.53	37.63	50.85	43.83
ILL.ribH-BSU23250.33~497	57.76	77.43	66.59	69.09	78.4	73.73	43.56	121.58	81.02	69.28	107.58	87.74
ILL.rimI-BSU05930.6~461	50.8	58.86	54.46	423.04	444.88	434.03	65.15	306.29	182.17	243.14	1455.87	855.59
ILL.rimM-BSU16020.5~529	203.43	249.96	224.52	446.45	517.38	481.75	446.28	779.51	605.95	188.88	1382.78	794.74
ILL.rimO-BSU25430.1~1356	219.22	260.58	238.18	162.79	227.98	195.13	131.73	336.92	230.77	38.22	191.09	115.47
ILL.rlmB-BSU00960.1~750	68.33	77.59	72.62	132.36	134.17	133.32	40.7	56.73	48	15.68	51.76	33.8
ILL.rluB-BSU23160.11~745	67.9	86.4	76.31	82.62	92.28	87.44	78.39	85.12	80.55	34.16	66.55	50.17
ILL.rluD-BSU15460.1~912	198.45	252.77	223.07	153.15	190.48	171.7	119.84	267.59	191.68	120.22	329.63	225.64
ILL.rnc-BSU15930.140~889	236.6	317.17	272.08	238.22	268.96	253.54	156.91	291.4	220.23	119.93	243.94	181.21
ILL.rnhB-BSU16060.7~774	29.14	40.58	34.31	260.67	312	286.19	53.21	162.68	105.74	212.94	650.58	431.96
ILL.rnhC-BSU28620.31~972	39.12	51.82	44.88	44.68	47.86	46.27	33.19	69.53	50.65	55.69	49.48	51.77
ILL.rnjA-BSU14530.1~1668	358	417.85	385.48	541.83	578.77	560.35	401.8	564.25	475.86	206.24	304.78	253.67
ILL.rnjB-BSU16780.1~1668	227	266.01	244.92	711.91	789.22	750.48	215.4	338.02	272.47	200.57	449.18	324.37
ILL.rnmV-BSU00410.69~629	99.26	120.66	109.04	133.89	143.21	138.56	38.43	160.04	97.4	66.58	396.18	233.1
ILL.rnpA-BSU41050.152~502	388.25	463.13	422.47	45.53	50.81	48.16	86.07	633.98	352.98	176.62	967.25	576.48
ILL.rnpB-BSU-misc-RNA-35.1~386	24219.9	23466.1	23926.8	9110.74	6270.86	7709.41	24683.5	18673.2	20952.1	114338	54164.8	82273
ILL.rnr-BSU33610.19~2358	41.3	59.26	49.41	128.2	122.84	125.6	93.59	153.35	121.48	82.87	121.21	101.2
ILL.rocA-BSU37780.10~1557	16.58	11.73	14.44	6.48	8.2	7.34	28.3	24.29	25.98	4.59	3.27	3.86
ILL.rocB-BSU37770.68~1768	1.09	0.66	0.9	1.52	1.98	1.75	0.62	1.2	0.9	0.28	0.43	0.35
ILL.rocC-BSU37760.1~1413	1.54	2.15	1.81	2.71	3.17	2.94	1.94	2.28	2.08	1.52	2.58	2.04
ILL.rocD-BSU40340.32~1237	6.02	7.61	6.75	39.81	49.38	44.57	9.08	7.67	8.25	16.38	58.48	37.57
ILL.rocE-BSU40330.223~1626	26.56	32.55	29.29	36.65	41.04	38.83	8.9	19.59	14.05	10.17	57.73	34.25
ILL.rocG-BSU37790.1~1275	14.24	10.99	12.81	4.98	8.1	6.53	26.3	21.14	23.42	4.24	2.65	3.34
ILL.rocR-BSU40350.10~1395	31.06	25.86	28.8	28.35	24.88	26.65	21.45	13.91	17.33	52.6	10.19	30.23
ILL.rodA-BSU38120.102~1283	63.67	75.68	69.17	67.42	71.03	69.23	43.41	101.03	71.11	19.5	52.38	35.95
ILL.rok-BSU14240.26~601	184.96	230.6	205.75	180.09	162.79	171.61	206.31	296.36	247.51	443.41	284.37	356.56
ILL.rpe-BSU15790.5~658	96.45	115.24	105.05	243.79	182.34	213.48	126.7	154.63	138.56	28.63	39.38	33.7
ILL.rph-BSU28370.20~757	60.36	116.6	85.63	75.03	58.3	66.78	63.63	94.29	78.05	63.52	83.99	73.09
ILL.rplA-BSU01030.95~793	4180.74	5122.14	4610.36	2555.74	3118.98	2835.63	2170.88	4723.62	3391.85	1156.96	2102.83	1621.61
ILL.rplB-BSU01190.32~865	5417.99	5948.67	5665.55	3380.05	4583.75	3977.31	3073.03	5539.21	4247.72	531.6	2762.61	1659.51
ILL.rplC-BSU01160.37~666	4886.28	5820.81	5313.86	3202.66	3944.08	3571.02	1840.01	5098.41	3418.13	922.12	2705.37	1821.88
ILL.rplD-BSU01170.28~651	3710.55	4275.34	3966.68	2277.4	2991.68	2631.92	1488.93	3969.15	2681.94	646.06	2087.9	1369.94
ILL.rplE-BSU01280.27~566	3809.04	4061.99	3929.42	2828.62	4326.86	3571.38	1986.52	2963.48	2449.99	119.45	842.03	484.96
ILL.rplF-BSU01310.1~540	3866.87	3798.02	3844.23	2688.78	4276.19	3475.6	2137.44	2837.82	2442.04	121.72	792.04	461.02
ILL.rplI-BSU40500.1~450	264.99	318.09	289.28	429.35	466.42	447.89	294.32	445.16	364.46	233.64	332.9	281.03
ILL.rplJ-BSU01040.66~566	5432.9	6582.91	5958.02	2968.04	4210.12	3584.08	3332.83	5987.18	4573.2	339.55	1923.58	1139.6
ILL.rplK-BSU01020.63~488	9168.43	12671.1	10752	3671.8	4598	4131.8	6718.37	10528.5	8532.67	2151.11	3459.71	2788.34
ILL.rplL-BSU01050.46~417	6965.36	8872.09	7819.7	4177.19	6254.71	5207.18	4918.55	8917.55	6749.41	836.74	3039.39	1942.81
ILL.rplM-BSU01490.49~486	6559.37	7083.27	6806.85	2422.54	4712.09	3556.73	3679.1	9096.22	6269.71	1280.37	3904.14	2594.01
ILL.rplN-BSU01260.41~409	3870.39	3994.09	3933.9	2842.89	4262.41	3546.65	1927.57	2969.64	2412.95	108.4	903.16	509.79
ILL.rplO-BSU01350.31~471	4786.45	5012.53	4889.43	3517.75	5433.78	4467.55	3399.44	3656.06	3498.27	206.48	991.33	615.45
ILL.rplP-BSU01230.2~436	4017.17	4129.83	4072.26	2799.51	4124.33	3456.39	1770.17	3241.99	2474.62	180.22	1165.45	678.47
ILL.rplQ-BSU01440.1~363	4531.09	5364.32	4912.92	3403.45	5343.36	4364.95	4348.78	4467.53	4352.53	473.83	1005.67	736.98
ILL.rplR-BSU01320.33~395	5022.65	4859.92	4960.58	3136.72	6138.89	4623.85	2439.72	3701.05	3027.12	131.2	1080.65	611.83
ILL.rplS-BSU16040.11~367	16419	18591.6	17422.9	5812.68	6483.08	6147.03	9179	16559	12638.7	14902.4	20957	17768.3
ILL.rplT-BSU28850.1~360	2684.36	3047.68	2852.3	1300.05	1862.17	1578.8	1451.61	3441.54	2402.35	2699.91	6045.35	4361.26
ILL.rplU-BSU27960.14~322	8957.45	11159.2	9958.05	3677.92	5612	4636.61	4603.47	9585.97	6991.87	2225.39	5534.43	3872.6
ILL.rplV-BSU01210.1~342	6963	7361.08	7155.44	4030.55	7485.84	5742.19	2101.74	6171.5	4051.35	430.98	2972.99	1711.72
ILL.rplW-BSU01180.1~288	4830.83	5115.11	4964.47	2538.91	3937.2	3231.92	1940.58	4948.41	3376.9	534.02	2648.93	1597.1
ILL.rplX-BSU01270.38~349	5243.69	5002.7	5121.07	3001.63	5783.43	4379.54	2182.29	3804.09	2865.76	126.98	1196.77	667.9
ILL.rpmA-BSU27940.2~286	7833.07	10049.5	8837.77	4935.03	5402.28	5168.46	7917.97	9923.31	8799.59	4495.07	5232.82	4812.02
ILL.rpmB-BSU15820.77~265	5276.87	8049.76	6522.87	4644.22	5056.72	4850.43	8024.64	8268.25	8073.84	4988.71	7506.19	6215.17
ILL.rpmC-BSU01240.1~201	4962.95	4663.32	4839.11	2663.88	5031.1	3835.83	1589.76	3703.48	2584.44	137.54	1371.35	756.42
ILL.rpmD-BSU01340.1~180	6554.91	6873.73	6682.46	3842.15	7815.94	5809.69	3006.97	6251.06	4410.24	201.56	1446.34	812.35
ILL.rpmE-BSU37070.16~216	8452.7	9892.29	9103.57	2952.17	4028.72	3486.03	6041.93	9276.56	7546.56	27653.1	23215.2	25208.4
ILL.rpmE2-BSU30700.121~369	10.07	8.41	9.35	9.06	6.9	7.99	9.31	7.78	8.45	3.96	5.72	4.8
ILL.rpmF-BSU15080.22~201	6739.16	9111.36	7810.44	5341.49	5889.04	5614.85	10743	11236.1	10884.9	5263.69	9673.49	7420.61
ILL.rpmG-BSU00990.93~242	373.96	424.77	397.45	432.75	357.24	395.6	197.38	329.47	258.61	138.59	126.98	131.1
ILL.rpmG-BSU24900.23~172	8603.77	6016.14	6549.42	2550.74	2988.5	2768.47	8420.61	5439.37	5772.28	6176.44	5350.05	5386.27
ILL.rpmH-BSU41060.140~274	4111.98	5046.59	4537.69	1564.06	1685.94	1625.08	4276.83	4692.44	4430.17	2402.24	3571.78	2963.69
ILL.rpmI-BSU28860.13~213	6095.69	6074.82	6095	2196.24	4357.95	3266.65	2045.96	6718.96	4248.02	4239.08	14539.6	9380.07
ILL.rpmJ-BSU01400.7~120	18414.9	18995.6	18293.3	11849.5	24341.4	18069.7	9158.76	15056.8	11350.6	713.48	3588.35	2203.28
ILL.rpoA-BSU01430.1~945	5912.86	6076.14	5998.05	3583.13	6370.95	4964.57	3570.62	4826.28	4137.74	345.94	1206.84	779.04
ILL.rpoB-BSU01070.2~3583	1254.65	1393.09	1319.01	1852.01	2174.79	2012.58	1180.72	2021.42	1573.63	1039.89	3197.8	2123.81
ILL.rpoC-BSU01080.62~3661	926.7	1034.35	976.76	1551.24	1743.06	1646.86	957.8	1394.27	1158.49	464.82	1728.83	1101.85
ILL.rpoE-BSU37160.73~594	938.27	954.16	947.15	376.89	326.62	352.18	293.08	817.78	544.05	540	548.86	536.67
ILL.rpoZ-BSU15690.1~204	670.75	841.2	748.14	594.19	699.7	646.66	462.96	953.86	679.54	157.22	274	214.59
ILL.rpsA-BSU22880.25~1173	722.77	742.01	732.84	988.87	770.66	881.29	456.45	526.18	484.22	749.71	614.16	670.07
ILL.rpsB-BSU16490.60~800	3086.28	4209.75	3594.87	2019.24	2887.81	2450.02	2574.54	4037.42	3253.76	734.7	1321.34	1022.63
ILL.rpsC-BSU01220.1~657	3612.93	3767.46	3686.62	2514.35	3588.38	3047.03	1583.08	2945.34	2253.58	217.42	1209.73	734.18
ILL.rpsD-BSU29660.112~714	3762.07	4412.04	4060.21	1813.66	2434.39	2121.69	2686.2	4639.43	3583.68	955.09	2347.99	1650.1
ILL.rpsE-BSU01330.1~501	4046.62	4006.66	4036.78	2780.92	4712.92	3738.33	2499.02	2864.59	2591.92	110.25	787.44	451.08
ILL.rpsF-BSU40910.30~317	6937.85	8249.29	7532.88	3096.88	4663.37	3873.45	2790.37	6811.97	4699.4	683.28	1958.8	1320.28
ILL.rpsG-BSU01110.10~480	7190.2	7405.72	7282.25	3598.18	5801.69	4690.31	3654.36	5965.28	4770.57	391.37	1901.59	1166.31
ILL.rpsH-BSU01300.32~430	4844.17	4369.33	4540.83	2796.88	4916.78	3847.26	2237.19	3251.54	2656.05	132.71	947.15	543.96
ILL.rpsI-BSU01500.21~413	4504.76	5982.32	5174.32	2552.56	3912.18	3226.56	4556.2	7507.56	5931.5	1557.73	3117.14	2327.96
ILL.rpsJ-BSU01150.113~421	4866.75	5225.86	5035.63	2559.02	3452.92	3002.53	1361.68	4634.11	2930.48	715.13	2330.52	1524.6
ILL.rpsK-BSU01420.1~396	3794.13	4274.72	4016.91	2670.43	4687.95	3670.14	2738.65	3264.47	2974.34	244.34	802.11	524.47
ILL.rpsL-BSU01100.114~530	7588.56	8629.92	8063	3787.52	6675.03	5218.29	3648.68	7029.72	5217.64	327.34	2208.71	1277
ILL.rpsM-BSU01410.1~366	5269.33	6350.42	5759.69	3922.19	7795.93	5840.94	3405.17	4821.11	4091.02	306.43	1197.05	758.75
ILL.rpsN-BSU01290.23~208	9273.99	9121.55	9228.17	5147.29	10828.2	7959.27	3379.59	7410.46	5250.31	236.45	2119.51	1173.7
ILL.rpsN-BSU08880.104~373	2.12	2.32	2.22	1.08	0.69	0.89	2.83	1.99	2.39	1.49	2.41	1.94
ILL.rpsO-BSU16680.58~327	9876.37	11357.5	10558.7	5685.23	7849.33	6758.65	5999.14	11380	8530.73	2998.06	5719.48	4335.57
ILL.rpsP-BSU15990.1~273	2191.96	2823.34	2478.41	1451.31	1468.69	1460.57	2599.17	2890.57	2704.15	1767.79	3197.68	2469
ILL.rpsQ-BSU01250.23~286	4704.22	4599.43	4667.73	2255.09	4870.16	3550	1201.12	3546.56	2311.73	125.78	1212.33	672.57
ILL.rpsR-BSU40890.1~240	6686.89	8562.66	7537.79	3235.44	4906.81	4063.83	4529.58	7474.47	5899.21	1530.89	2397.06	1950.64
ILL.rpsS-BSU01200.8~286	6364.03	6199.69	6269.7	3421.11	5820.72	4610	1910.16	5303.07	3472.89	398.61	2713.08	1558.58
ILL.rpsT-BSU25550.51~317	7176.68	10365.7	8610.66	4570.79	4277.06	4427.5	8366.86	8627.2	8232.61	9692.31	8114.16	8872.68
ILL.rpsU-BSU25410.11~184	13320.3	15011.6	14073	6887.48	9566.12	8215.66	6586.32	12746.2	9665.87	8406.45	11256.7	10031.6
ILL.rsbP-BSU34110.36~1247	40.08	49.75	44.44	47.46	52.46	49.95	25.58	46.4	35.31	29.76	41.9	35.47
ILL.rsbQ-BSU34100.16~825	44.18	47.6	45.8	52.04	57.63	54.83	39.94	46.3	42.5	44.76	48.41	45.99
ILL.rsbRA-BSU04670.39~863	88.08	103.1	94.96	139.42	131.65	135.64	70.46	165.24	115.46	191.62	374.52	281.69
ILL.rsbRB-BSU13200.12~845	111.24	117.11	114.1	53.89	58.94	56.41	89.39	111.01	98.1	63.47	74.05	67.86
ILL.rsbRC-BSU19450.16~864	38.63	38.01	38.43	50.2	57.74	53.96	15.06	39.96	27	19.01	58.77	38.96
ILL.rsbRD-BSU24760.87~923	1.3	1.86	1.56	4.82	4.97	4.9	3.59	3.33	3.41	57.92	19.21	37.51
ILL.rsbS-BSU04680.4~369	121.42	123.01	121.43	176.93	189.72	183.34	85.43	218.17	148.75	178.89	433.53	303.91
ILL.rsbT-BSU04690.4~405	143.97	150.01	146.97	204.77	239.63	222.12	102.29	266.46	180.79	179.56	557.71	368.92
ILL.rsbU-BSU04700.1~1008	91.16	91.08	91.29	154.9	155.61	155.31	76.97	166.88	119.52	108.49	317.92	213.49
ILL.rsbV-BSU04710.1~330	114.87	106.41	111.34	195.26	209.39	202.34	114.84	207.2	158.24	130.64	383.27	256.74
ILL.rsbW-BSU04720.1~483	99.39	119.84	108.69	187.76	245.58	216.46	117.18	229.19	170.71	131.87	428.11	280.81
ILL.rsbX-BSU04740.1~600	99.97	107.15	103.28	154.33	172.95	163.61	111.12	233.84	169.83	144.33	440.35	293.76
ILL.rseP-BSU16560.1~1269	274.25	274.7	275	544.72	527.46	536.41	319.42	591.54	447.56	157.59	576.72	368.67
ILL.rsfA-BSU37620.1~777	0.44	0.78	0.59	1.41	0.48	0.95	1.32	1.28	1.2	0.99	0.77	0.86
ILL.rsgI-BSU13460.1~1146	20.35	22.89	21.51	26.23	27.16	26.7	10.65	30.17	20.18	36.26	102.51	69.49
ILL.rsiV-BSU27130.1~858	1.08	1.39	1.22	1.86	1.8	1.83	1.08	1.27	1.16	0.57	6.12	3.41
ILL.rsiW-BSU01740.14~640	393.41	536.49	458.2	224.82	261.48	243.06	320.46	990.7	644.26	850.28	4542.69	2714.55
ILL.rsiX-BSU23090.1~1107	181.47	232.54	204.69	178.63	225.67	201.99	50.53	158.02	102.65	14.84	72.39	43.93
ILL.rsmB-BSU15740.1~1344	66.04	70.24	68.06	300.86	334.26	317.52	81.99	112.5	95.71	50.93	98.58	74.46
ILL.rsoA-BSU33222.1~240	0.88	3.66	2.12	1.6	2.95	2.27	3.27	10.25	6.57	1.74	5.07	3.39
ILL.rtp-BSU18490.41~409	7.71	14.11	10.53	11.94	8.06	10.03	11.76	17.18	14.31	3.72	24.77	14.4
ILL.rtpA-BSU02530.98~259	5.47	7.14	6.23	1.09	1.39	1.24	6.34	12.15	8.93	3.85	37.99	20.99
ILL.ruvA-BSU27740.12~617	66.35	69.57	67.93	62.09	59.28	60.73	61.22	87.69	74.62	48.79	87.08	68.75
ILL.ruvB-BSU27730.11~1015	65.24	76.68	70.34	70.45	70.27	70.39	66.42	91.8	77.51	45.84	74.17	59.5
ILL.sacA-BSU38040.1~1440	29.92	27.54	28.92	51.87	64.73	58.26	312.33	655.63	476.49	315.04	423.76	365.87
ILL.sacB-BSU34450.132~1553	0.83	0.95	0.89	0.47	0.77	0.62	4.98	10.7	7.68	12.17	105.64	59.61
ILL.sacC-BSU27030.1~2034	1.59	1.45	1.53	1.53	1.4	1.46	2.84	1.89	2.33	2.59	2.15	2.33
ILL.sacP-BSU38050.1~1386	19.78	14.43	17.43	34.61	44.29	39.42	177.76	434.05	301.15	449.71	548.48	493.47
ILL.sacT-BSU38070.1~831	8.86	8.83	8.86	29.18	24.37	26.81	4.67	18.1	11.12	12.46	10.95	11.52
ILL.sacV-BSU04830.9~203	2.7	2.26	2.51	0.99	1.01	1	2.68	5.53	4.23	10.08	260.43	138.41
ILL.sacX-BSU38410.272~1651	8.82	10.42	9.56	21.08	23	22.04	5.55	14.47	9.85	11.8	18.09	14.83
ILL.sacY-BSU38420.1~843	17.01	14.55	15.95	29.68	31.49	30.59	7.13	23.16	14.92	12.59	26.84	19.66
ILL.safA-BSU27840.1~1164	1.67	1.95	1.8	7.68	9.54	8.6	4.53	5.12	4.76	1.67	6.31	4.01
ILL.salA-BSU01540.20~1078	501.87	524.46	512.99	337.96	299.5	319.07	564.28	524.75	536.75	380.19	436.92	403.7
ILL.sapB-BSU06650.107~805	21.88	25.18	23.4	63.31	39.77	51.68	3.85	17	10.25	30.82	51.32	40.81
ILL.sat-BSU10920.1~1170	0.06	0.45	0.23	0.1	0.56	0.33	0.09	0.09	0.09	0.07	0.54	0.31
ILL.sat-BSU15590.49~1197	28.72	18.25	24.08	264.18	348.44	306	10.89	9	9.8	2.55	16.73	9.73
ILL.sbcC-BSU10650.1~3393	28.37	27.84	28.19	46.09	43.07	44.62	17.58	27.7	22.37	3.51	5.73	4.59
ILL.sbcD-BSU10640.8~1183	19.33	20.8	20.03	37.28	33.12	35.24	13.18	18.53	15.61	4.43	7.4	5.88
ILL.sboA-BSU37350.33~164	2.77	1.17	2.07	5.22	4.26	4.74	10.51	2.24	5.39	9.59	1.13	4.37
ILL.sboX-BSU37360.1~153	2.8	0.88	1.96	0	3.2	1.58	0.68	0.82	0.74	1.64	0	0.82
ILL.sbp-BSU15270.1~366	74.38	77.34	75.86	101.88	159.46	130.42	34.97	102.15	69.75	18.14	54.02	36.15
ILL.scoA-BSU38990.1~717	1.66	1.53	1.6	1.62	3.78	2.69	2.68	3.95	3.26	4.88	6.16	5.46
ILL.scoB-BSU38980.1~651	2.46	2.61	2.53	3.6	3.68	3.64	5.73	6.79	6.17	6.18	6.87	6.44
ILL.scpA-BSU23220.36~791	82.15	99.49	90.08	48.9	71.97	60.34	43.92	123.94	83.55	25.53	112.72	69.52
ILL.scr-BSU-misc-RNA-2.1~103	117511	24714.5	76654.3	125618	40544	83119.1	182039	43976.6	123189	266429	125929	202465
ILL.scuA-BSU21750.148~729	10.82	13.31	11.95	133.13	136.78	134.99	7.03	9.72	8.28	20.3	20.81	20.27
ILL.sda-BSU25690.26~184	68.39	59.52	64.61	38.17	50.87	44.47	22.68	63.78	43.2	45.2	38.38	41.15
ILL.sdaAA-BSU15860.26~928	55.26	69.45	61.24	201.39	211.51	206.49	82.98	99.84	90.68	100.2	113.76	106.48
ILL.sdaAB-BSU15850.75~737	55.74	62.26	58.77	182.7	169.7	176.34	80.93	97.65	87.91	97.84	113.98	104.8
ILL.sdhA-BSU28440.1~1761	715.89	674.18	698.56	895.84	984.37	940.05	718.01	641.02	669.41	697.58	352.08	511.22
ILL.sdhB-BSU28430.3~764	811.45	808.48	811.59	1134.85	1273.13	1203.79	765.28	798.45	774.8	861.19	345.89	588.44
ILL.sdhC-BSU28450.26~634	538.5	483.87	515.17	588.99	633.3	611.18	595.52	504.54	539.44	606.36	300.37	443.24
ILL.sdpA-BSU33750.52~528	5.93	7.08	6.46	4.88	7.69	6.27	1.56	7.96	4.67	4.17	3.13	3.59
ILL.sdpB-BSU33760.1~972	1.53	2.63	2.02	1.29	4.31	2.78	0.27	2.98	1.6	0.63	0.42	0.51
ILL.sdpI-BSU33780.1~624	21.46	27.01	23.99	24.57	37.16	30.82	11.15	27.26	18.89	11.17	18.92	14.92
ILL.sdpR-BSU33790.47~319	31.14	34.79	32.84	34.55	42.59	38.54	18.52	29.96	23.4	17.89	25.71	21.62
ILL.seaA-BSU22850.1~894	2.54	3.62	3.03	26.36	28.68	27.52	1.8	8.47	5.05	17.84	78.94	48.66
ILL.secA-BSU35300.168~2693	213.48	240.65	226.07	290.52	335.5	312.91	215.37	225.34	217.15	101.59	126.44	112.78
ILL.secDF-BSU27650.1~2214	195.95	210.57	202.89	219.08	209.59	214.48	188.25	219.24	200.38	119.2	136.92	126.5
ILL.secE-BSU01000.34~213	413.12	540.83	470.73	370.64	379.07	374.99	151.61	369.55	262.74	98.6	137.76	117.24
ILL.secG-BSU33630.39~269	1316.29	1100.94	1223.04	1044.43	877.26	962.2	1977.09	1269.96	1614.59	1329.83	696.57	995
ILL.secY-BSU01360.2~1297	3704.43	3798.72	3754.12	2521.63	4483.68	3493.89	2280.75	2680.36	2444.67	146.71	756.94	455.21
ILL.senS-BSU08810.72~290	0	0	0	0	0.2	0.1	0	0.38	0.18	1.05	19.46	10.44
ILL.sepF-BSU15390.1~450	224.25	296.97	257.11	482.44	511.35	496.96	262.3	257.1	261.49	188.7	168.52	177.83
ILL.serA-BSU23070.33~1610	210.23	262.9	233.87	1773.03	1548.59	1662.7	60.38	109.96	84.11	642.05	555.4	588.43
ILL.serC-BSU10020.31~1110	147.9	177.5	161.44	485.12	483.03	484.29	60.91	95.15	76.8	152.42	168.7	158.55
ILL.serS-BSU00130.57~1334	181.68	217.26	197.97	35	33.94	34.49	157.98	249.99	200.91	59.68	364.2	213.81
ILL.sigA-BSU25200.129~1244	454.01	532.99	489.89	454.6	513.06	483.73	230.87	539.8	379.56	80.33	805.72	449.42
ILL.sigB-BSU04730.1~789	81.26	87.8	84.33	157.37	152.53	155.04	111.25	189.74	148.16	126.1	327.97	226.9
ILL.sigD-BSU16470.1~765	95.94	102.39	99.02	547.58	605.69	576.58	32.27	39.82	35.6	10.74	9.1	9.76
ILL.sigE-BSU15320.63~782	0.83	1.18	0.99	1.24	1.35	1.3	0.46	0.83	0.63	0.95	1.34	1.14
ILL.sigF-BSU23450.1~768	1.38	2.87	2.05	8.13	4.56	6.36	2.26	2.54	2.36	1	5.55	3.3
ILL.sigG-BSU15330.1~783	8.65	8.88	8.77	6.07	6.15	6.11	6.52	8.41	7.43	2.6	9.54	6.09
ILL.sigH-BSU00980.5~661	281.66	276.09	279.66	317.19	320.1	318.77	146.57	215.13	177.37	83.92	100.35	91.04
ILL.sigI-BSU13450.5~760	15.44	16.26	15.84	19.47	24.06	21.75	7.58	25.83	16.4	39.83	123.44	81.77
ILL.sigL-BSU34200.13~1323	28.98	27.87	28.54	23.48	23.29	23.4	34.86	21.83	27.95	73.06	27.56	48.85
ILL.sigM-BSU09520.18~509	47.46	50.39	48.41	45.68	51.25	48.45	21.5	58.54	38.2	19.43	65.28	42.15
ILL.sigO-BSU33230.1~531	2.42	2.52	2.47	1.69	2.15	1.92	1.78	6.19	3.95	0.56	5.02	2.82
ILL.sigV-BSU27120.1~501	0.76	0.53	0.66	1.1	1.6	1.35	0.71	2.25	1.49	0.71	5	2.88
ILL.sigW-BSU01730.58~621	383.97	537.96	453.61	188.95	263.36	225.86	223.03	923.96	562.91	618.12	4466.48	2564.43
ILL.sigX-BSU23100.40~624	192.59	222.86	206.52	201.2	234.85	217.94	80.23	150.2	113.37	22.9	68.65	45.9
ILL.sigY-BSU38700.1~537	6.03	6.24	6.14	9.37	10	9.68	5.79	5.57	5.6	2.97	3.85	3.38
ILL.sigZ-BSU26840.23~553	4.76	5.36	5.04	5.95	4.68	5.33	1.78	4.64	3.16	4.28	4.12	4.14
ILL.sinI-BSU24600.100~273	27.29	33.31	29.83	15.33	16.68	16	41.18	35.02	37.74	14.87	14.21	14.36
ILL.sinR-BSU24610.2~337	176.9	218.64	195.86	197.29	173.55	185.63	217.81	229.15	218.78	184.7	137.89	158.52
ILL.sipS-BSU23310.1~555	197.69	243.28	218.49	382.1	366.1	374.35	130.53	222.38	174.24	111.83	260.22	185.98
ILL.sipT-BSU14410.35~616	79	115.89	95.38	107.5	119.47	113.47	107.44	133.62	119.09	142.96	144.13	142.02
ILL.sipU-BSU04010.1~564	87.79	77.18	83.23	26.87	27.09	26.99	53.57	96.16	73.77	23.79	35.37	29.34
ILL.sipV-BSU10490.2~508	35.59	38.72	37.06	25.51	32.05	28.76	27.79	32.04	29.37	14.79	13.2	13.78
ILL.sipW-BSU24630.1~573	1.2	3.22	2.1	0.22	0	0.11	0.07	0.21	0.14	0.16	0.53	0.34
ILL.sirB-BSU15620.1~786	69.92	53.54	62.74	372.85	457.31	414.82	29.49	41.18	34.99	51.97	37.61	44
ILL.sirC-BSU15630.1~489	77.62	61.62	70.63	434.4	497.3	465.72	39.87	52.19	45.27	51.52	41.72	45.8
ILL.skfA-BSU01910.44~211	49.19	52.05	50.57	42.96	38.51	40.78	65.37	55.49	60.26	89.18	60.5	74.03
ILL.skfB-BSU01920.67~1299	3.56	3.89	3.71	3.12	4.1	3.61	2.24	3.24	2.7	1.22	2.11	1.66
ILL.skfC-BSU01935.1~1491	3.56	2.82	3.24	4.54	4.63	4.59	2.12	3.23	2.64	1.11	2.43	1.77
ILL.skfE-BSU01950.19~738	5.23	3.88	4.64	8.67	7.21	7.95	3.12	3.69	3.45	1.51	1.9	1.69
ILL.skfF-BSU01960.1~1344	2.72	3.03	2.86	4.22	3.9	4.06	0.91	2.25	1.56	0.18	1.29	0.76
ILL.skfG-BSU01970.6~521	1.69	4.1	2.77	6.36	5.61	5.99	2.85	3.5	3.13	0.19	0.82	0.51
ILL.skfH-BSU01980.5~430	3.86	4.46	4.14	8.36	7.64	8.01	1.68	3.9	2.7	0.97	2.75	1.86
ILL.sleB-BSU22930.1~918	0.48	0.3	0.4	0.64	1.53	1.09	2.91	11.05	6.87	11.18	91	51.75
ILL.slp-BSU14620.12~386	10.26	11.38	10.78	20.9	16.97	18.97	9.46	23.31	16.01	200.94	205.1	200.09
ILL.slrA-BSU38229.168~326	43.73	66.69	54.08	25.2	31.44	28.3	65.75	83	73.42	29.29	22.18	25.29
ILL.slrR-BSU34380.1~459	0.58	2.03	1.22	0.1	0.32	0.21	0.4	0.2	0.3	0.23	0.11	0.17
ILL.smc-BSU15940.9~3569	102.85	115.85	108.84	259.51	276.12	267.84	83.71	133.48	106.83	74.9	201.69	138.39
ILL.smpB-BSU33600.1~471	138.08	160.34	148.32	213.37	211.82	212.7	69.82	204.5	134.81	193.27	219.67	204.08
ILL.sodA-BSU25020.37~645	2036.89	2423.11	2213.42	1664.56	1417.32	1542.92	1576.74	2247.85	1878.94	2601.95	1617.07	2067.1
ILL.sodC-BSU19400.93~683	1.72	2.13	1.91	49.15	46.28	47.75	4.74	5.97	5.22	1.33	5.14	3.25
ILL.sodF-BSU19330.1~846	0.13	0.64	0.36	0.74	1.13	0.93	0.45	2.25	1.32	4.87	16.12	10.52
ILL.spbC-BSU33770.43~654	19.91	18.76	19.43	72.37	91.64	81.94	6	12.41	9.05	12.38	13.48	12.76
ILL.spcB-BSU23210.1~594	85.33	112.39	97.47	62.96	80.98	71.91	52.72	122.6	87.28	24.43	104.8	65.91
ILL.speA-BSU14630.27~1499	156.66	200.11	176.36	73.53	86.76	80.11	41.84	171.77	105.3	16.15	147.57	82.93
ILL.speB-BSU37490.61~933	215.38	280.09	244.77	177.22	204.62	190.86	172.47	333.06	248.89	55.52	285.98	171.95
ILL.speD-BSU29010.118~498	1164.53	1385.72	1262.73	778.22	731.95	755.66	460.01	1343.72	869.07	2166.51	742.11	1381.64
ILL.speE-BSU37500.27~857	329	381.94	353.07	159.78	179.1	169.41	98.24	334.46	214.06	45.84	234.86	141.7
ILL.splA-BSU13920.91~330	16.49	21.88	18.93	37.21	55.33	46.19	47.25	76.38	60.84	38.75	210.43	125.42
ILL.splB-BSU13930.1~1029	17.33	19.54	18.33	38.4	57.17	47.71	49.62	77.05	62.39	42.5	225.96	135.36
ILL.spmA-BSU23180.1~591	2.64	3.02	2.82	3.07	5.45	4.25	7.04	11.43	9.1	1.46	21.25	11.49
ILL.spmB-BSU23170.1~537	1.86	3.75	2.71	3.51	5.72	4.61	6.59	11.95	9.21	0.65	18.72	9.86
ILL.spo0A-BSU24220.196~999	95.48	98.48	97.02	140.9	127.95	134.55	97.15	114.8	104.4	124.45	117.69	119.2
ILL.spo0B-BSU27930.321~899	74.48	101.92	86.9	110.81	170.96	140.63	104.41	292.95	195.07	76.72	396.23	238.35
ILL.spo0E-BSU13640.48~305	92.34	147.62	117.11	147.24	160.87	154.05	60.16	104.06	78.96	25.14	48.43	36.6
ILL.spo0F-BSU37130.1~375	35.42	42.06	38.46	51.34	44.16	47.81	31.48	65.91	47.54	18.95	137.62	78.95
ILL.spo0M-BSU08760.7~783	276.4	307.7	290.97	102.07	110.5	106.29	74.37	34.82	53.58	4.35	1.91	3.02
ILL.spoIIAA-BSU23470.14~367	2.14	3.33	2.67	8.26	2.81	5.57	2.76	4.14	3.33	0.48	6.08	3.31
ILL.spoIIAB-BSU23460.1~441	3.04	1.95	2.56	10.93	5.85	8.42	3.96	3.43	3.7	1.29	6	3.66
ILL.spoIIB-BSU28060.117~1115	0.78	0.97	0.87	1.63	1.9	1.76	0.1	2.84	1.44	0.34	3.71	2.05
ILL.spoIID-BSU36750.152~1183	10.76	13.43	11.98	21.4	27.45	24.4	27.57	195.4	109.74	87.35	706.63	401.66
ILL.spoIIE-BSU00640.200~2683	6.88	11.19	8.83	13.64	21.91	17.74	3.66	70.08	36.28	37.83	754	401.92
ILL.spoIIGA-BSU15310.155~1084	0.49	0.61	0.55	0.67	0.65	0.66	0.79	0.62	0.7	0.51	0.78	0.64
ILL.spoIIIAA-BSU24430.1~924	0.28	0.2	0.24	0.38	0.22	0.3	0.91	0.5	0.67	0.62	2.98	1.86
ILL.spoIIIAB-BSU24420.1~516	0.65	0.1	0.41	0.09	0.45	0.27	0.68	1.21	0.93	0	1.75	0.89
ILL.spoIIIAC-BSU24410.1~207	0.43	0	0.24	0.47	0	0.24	1.27	0.95	1.11	1	3.47	2.23
ILL.spoIIIAD-BSU24400.1~402	0.81	0.43	0.65	0.63	0.51	0.57	0.12	0.87	0.48	0.7	3.03	1.87
ILL.spoIIIAE-BSU24390.1~1200	0.41	0.29	0.36	0.47	0.45	0.46	0.58	0.95	0.76	0.46	2.6	1.54
ILL.spoIIIAF-BSU24380.1~621	0.45	0.32	0.39	0.48	1.13	0.8	0.2	0.54	0.36	0.31	2.03	1.18
ILL.spoIIIAG-BSU24370.1~690	0.28	0.56	0.4	1.03	0.68	0.86	0.23	0.47	0.35	0.2	1.96	1.09
ILL.spoIIIAH-BSU24360.1~657	1.07	1.04	1.06	1.1	1.32	1.2	0.81	1.13	0.96	0.64	2.29	1.47
ILL.spoIIID-BSU36420.9~290	1.2	1.12	1.16	0.32	0.33	0.33	0.52	1.27	0.88	0.12	0.23	0.17
ILL.spoIIIE-BSU16800.70~2439	27.12	38.44	32.24	93.86	108.08	100.94	12.94	48.37	30.21	43.38	117.84	80.67
ILL.spoIIIJ-BSU41040.1~786	477.63	574.86	521.96	185.37	158.66	172.23	226.62	688.28	450.05	206.9	842.37	527.11
ILL.spoIIM-BSU23530.101~745	0.74	0.76	0.75	1.51	1.16	1.33	1.69	3.54	2.57	4.14	11.92	8.04
ILL.spoIIP-BSU25530.63~1268	1.11	1.21	1.16	7.9	9.5	8.7	1.76	2.11	1.91	4.92	13.17	9.05
ILL.spoIIQ-BSU36550.1~852	4	4.85	4.39	6.05	3.74	4.91	5.49	9.29	7.27	4.8	11.17	7.97
ILL.spoIIR-BSU36970.1~675	2.82	3.65	3.2	14.76	15.58	15.17	8.29	28.59	18.12	14.87	66.44	40.87
ILL.spoIISA-BSU12830.1~747	38.51	43.5	40.82	61.81	68.51	65.15	39.63	113	75.06	58.56	133.41	95.82
ILL.spoIISB-BSU12820.1~171	40.8	56.12	47.66	100.23	116.08	108.12	48.06	97.06	74.12	147.67	186.01	166.74
ILL.spoIVA-BSU22800.135~1613	2.25	2.97	2.58	22.2	22.3	22.26	5.23	17.05	10.97	31.97	89.71	60.91
ILL.spoIVB-BSU24230.1~1281	1.44	1.45	1.42	9.51	13.39	11.43	2.73	8.97	5.82	3.33	21.93	12.8
ILL.spoIVCA-BSU25770.9~1511	5.74	5.51	5.65	7.33	6.75	7.04	2.46	5.54	3.94	6.37	12.65	9.49
ILL.spoIVFA-BSU27980.150~944	4.58	4.25	4.44	10.72	12.69	11.7	7	31.69	19.02	19.56	139.16	80.29
ILL.spoIVFB-BSU27970.1~867	3.32	3.28	3.31	10.48	8.79	9.65	5.69	23.6	14.4	12.33	86.48	49.91
ILL.spoVAA-BSU23440.1~621	0	0	0	0.07	0.21	0.14	0.07	0.14	0.1	0.08	1.01	0.55
ILL.spoVAB-BSU23430.1~426	0	0	0	0.23	0.12	0.18	0	0.11	0.06	0	0.48	0.25
ILL.spoVAC-BSU23420.1~453	0	0	0	0.21	0.11	0.16	0.1	0.1	0.1	0	1.33	0.67
ILL.spoVAD-BSU23410.1~1017	0.07	0.22	0.14	0.88	0.78	0.83	0.22	0.15	0.18	0.25	1.75	1.01
ILL.spoVAEA-BSU23401.8~619	1.03	0.88	0.96	2.01	2.63	2.32	0.47	1.09	0.76	1.08	3.56	2.32
ILL.spoVAEB-BSU23402.1~351	0.43	0.71	0.56	1.56	1.27	1.42	1.04	0.15	0.6	1.03	1.47	1.24
ILL.spoVAF-BSU23390.1~1482	3.71	4.38	4.02	7.93	11.73	9.81	4.17	5.32	4.68	3.5	11.6	7.57
ILL.spoVB-BSU27670.116~1672	0.55	0.86	0.69	0.7	0.6	0.65	0.13	1.28	0.7	1.05	1.99	1.52
ILL.spoVD-BSU15170.81~2021	2.66	2.73	2.7	11.7	14.98	13.33	6.5	19.37	12.75	23.84	100.88	62.74
ILL.spoVE-BSU15210.1~1101	143.04	162.93	152.23	155.99	190.79	173.28	114.92	155.8	133.43	34.45	99.65	67.17
ILL.spoVFA-BSU16730.1~894	0.53	0.51	0.52	5.18	6.79	5.98	8.18	13.61	10.56	37.6	291.03	166.21
ILL.spoVFB-BSU16740.1~603	1.2	0.83	1.03	8.91	11.81	10.35	12.73	19.81	16.02	67.15	413.67	242.22
ILL.spoVG-BSU00490.1~294	317.79	544.8	419.79	858.9	466.24	665	405.31	246.56	323.99	257.26	965.42	611.75
ILL.spoVID-BSU28110.18~1745	0.92	1.14	1.02	9.14	13.38	11.24	2.84	7.19	4.94	8.81	54.95	32.18
ILL.spoVIF-BSU11810.1~255	0	0.32	0.14	4.49	5.45	4.96	1.57	1.68	1.6	4.28	42.22	23.33
ILL.spoVK-BSU17420.503~1471	1.75	2.25	1.98	18.66	30.15	24.35	4.16	9.39	6.69	1.43	35.51	18.79
ILL.spoVM-BSU15810.1~81	75.51	125.87	97.97	485.89	307.86	397.25	99.28	204.78	137.91	73.76	43.52	59.8
ILL.spoVR-BSU09400.1~1407	1.32	1.61	1.45	1.43	2.11	1.76	0.69	1.03	0.85	0.74	5.6	3.19
ILL.spoVS-BSU16980.69~329	129.99	207.75	164.45	261.81	308.44	285	234.45	427.34	323.48	229.77	1092.66	662.82
ILL.spoVT-BSU00560.1~537	80.25	97.48	88.08	145.05	146.91	146.04	115.71	184.09	147.11	46.91	122.31	84.56
ILL.sppA-BSU29530.104~1111	189.87	209.73	199.15	49.23	39.57	44.47	114.55	144.37	127.58	26.58	89.02	57.97
ILL.spsA-BSU37910.1~771	0.69	0.91	0.79	1.37	1.24	1.31	0.26	1.34	0.78	0.82	4.2	2.53
ILL.spsB-BSU37900.1~1425	0.85	0.6	0.74	1.17	1.36	1.26	0.56	1.62	1.07	0.78	3.18	1.99
ILL.spsC-BSU37890.1~1170	1.14	1.2	1.17	1.79	2.12	1.95	1.13	1.68	1.38	0.51	2.95	1.74
ILL.spsD-BSU37880.1~870	1.53	1.37	1.46	2.33	2.94	2.64	1.33	1.25	1.27	0.41	2.53	1.48
ILL.spsE-BSU37870.1~1122	0.98	0.98	0.98	1.91	2.54	2.22	1.12	1.13	1.11	0.49	2.21	1.36
ILL.spsF-BSU37860.1~723	1.64	1.51	1.58	2.91	3.2	3.05	0.66	1.84	1.23	0.51	1.97	1.24
ILL.spsG-BSU37850.1~1020	1.44	1.53	1.48	1.86	2.21	2.04	1.14	1.33	1.22	0.47	1.71	1.09
ILL.spsI-BSU37840.25~765	5.53	6.56	6.01	4.96	7.3	6.12	4.33	4.48	4.34	2.31	6.3	4.31
ILL.spsJ-BSU37830.1~948	6.67	6.02	6.37	7.2	7.89	7.55	3.72	4.79	4.23	1.55	6.75	4.17
ILL.spsK-BSU37820.5~856	5.36	4.56	4.99	6.67	8	7.33	3.2	4.14	3.62	1.45	5.55	3.52
ILL.spsL-BSU37810.1~456	4.06	4.33	4.08	6.81	10.59	8.69	0.9	4.01	2.46	2.2	5.7	3.95
ILL.spxA-BSU11500.1~396	595.78	644.66	618.88	365.17	286.44	326.37	760.84	493.79	618.3	947.12	377.38	645.84
ILL.sqhC-BSU19320.101~1999	1.39	1.49	1.44	4.56	4.83	4.69	1.05	5.41	3.18	15.04	27.18	21
ILL.srfAA-BSU03480.298~11061	218.13	260.66	237.61	18.43	26.73	22.54	352.17	240.06	291.71	24.74	29.76	26.93
ILL.srfAB-BSU03490.13~10764	222.19	261.93	240.42	23.83	34.34	29.04	296.36	172.74	231.16	5.13	5.19	5.09
ILL.srfAC-BSU03510.1~3828	228.79	277.19	250.9	24.42	33.74	29.04	265.67	163.7	211.76	4.5	4.26	4.32
ILL.srfAD-BSU03520.29~757	261.81	331.79	293.64	25.89	38.53	32.16	352.82	214.38	279.71	6.07	4.69	5.28
ILL.ssbA-BSU40900.1~519	6763.66	9292.78	7908.31	3386.92	5651.52	4509.22	3080.05	7563.22	5244.13	805.81	2246.1	1528.04
ILL.ssbB-BSU36310.1~342	43.78	26.79	36.28	24.85	21.92	23.41	18.94	27.73	23.04	8.6	16.17	12.32
ILL.sspA-BSU29570.4~213	141.75	160.26	150.32	146.23	139.49	142.96	113.18	193.85	148.62	91.93	90.27	90.59
ILL.sspB-BSU09750.35~238	0.94	2.35	1.57	0.26	0.26	0.26	5.29	7.15	6.25	59.52	57.56	57.85
ILL.sspC-BSU19950.119~337	0.12	0.31	0.21	0.81	0.48	0.64	0.13	0.2	0.16	1.04	0.42	0.71
ILL.sspD-BSU13470.131~325	2.05	3.54	2.72	3.26	5.61	4.43	1.3	5.08	3.12	11.15	21.24	16.48
ILL.sspE-BSU08660.1~255	316.84	367.13	339.97	180.53	194.93	187.74	172.45	288.56	226.39	94.69	175.12	134.13
ILL.sspF-BSU00450.160~345	6.91	18.24	11.98	26.91	23.27	25.12	81.58	262.8	165.94	570.41	1414.45	989.97
ILL.sspG-BSU32640.159~305	0.18	0	0.1	0.2	0.4	0.3	0	0.2	0.09	0.22	1.66	0.94
ILL.sspH-BSU08110.54~233	24.38	20.56	22.73	22.26	24.56	23.41	64.94	46.98	57.09	124.21	25.55	73.07
ILL.sspI-BSU28660.50~265	5.43	3.91	4.76	6.82	4.65	5.75	4.06	5.63	4.56	7.47	7.65	7.47
ILL.sspJ-BSU33340.167~307	2.16	1.21	1.74	2.69	3.82	3.25	1.45	3.55	2.46	4.78	16.14	10.54
ILL.sspK-BSU08550.108~260	0.98	0.74	0.88	0.86	1.31	1.08	0.4	1.27	0.82	0.24	0.9	0.57
ILL.sspL-BSU22000.42~170	35.76	36.27	36.08	73.61	68.84	71.28	29.18	43.44	34.77	33.52	60.48	46.57
ILL.sspM-BSU22290.1~105	3.05	11.56	6.82	10.73	3.59	7.16	0	29.23	11.51	23.82	31.82	27.61
ILL.sspN-BSU18020.65~211	1.61	0.51	1.12	47.39	89.26	68.12	1.61	1.79	1.69	24.32	20.17	22.02
ILL.sspO-BSU17990.1~147	0	1.72	0.76	1.56	0	0.78	1.25	0	0.72	0	0	0
ILL.sspP-BSU17980.1~147	0	0	0	1.56	0	0.78	0	1.74	0.72	1.54	0	0.81
ILL.ssrA-BSU-misc-RNA-55.1~362	7693.49	10703.2	9053.37	13968.5	12363.6	13180.5	17253.1	7782.65	12451.2	24576.1	13268.6	18539.4
ILL.ssuA-BSU08840.1~999	0.04	0.04	0.04	0.39	0.48	0.43	0	0.04	0.02	0.04	5.04	2.58
ILL.ssuB-BSU08830.1~768	0	0.06	0.03	0.58	0.49	0.54	0	0.1	0.05	0.06	5.61	2.88
ILL.ssuC-BSU08850.1~831	0.18	0.28	0.22	0.58	0.59	0.59	0.23	0.14	0.19	0.27	3.53	1.92
ILL.ssuD-BSU08860.1~1131	0.31	0.47	0.38	1.38	1.38	1.38	0.36	0.49	0.42	0.6	4.51	2.58
ILL.stoA-BSU13840.5~502	24.39	26.62	25.44	19.97	21.53	20.75	14.69	27.19	20.69	10.76	59.05	35.36
ILL.sucA-BSU19370.95~2929	1243.5	1085.96	1174.16	1507.37	1338.58	1424.47	1037.38	1066.88	1036.46	645.04	357.01	488.67
ILL.sucC-BSU16090.7~1164	950.85	1033.16	989.63	2242.9	2075.02	2160.77	822.1	946.85	871.77	1398.04	941.44	1145.93
ILL.sucD-BSU16100.29~931	751.77	888.67	814.44	2182.85	1820.2	2004.3	802.09	806.57	793.9	1350.03	761.12	1031.49
ILL.sufB-BSU32670.21~1418	775.24	936.18	848.81	1151.13	1179.24	1165.54	633.82	844.51	729.07	375.12	491.06	428.93
ILL.sufC-BSU32710.194~979	628.74	627.34	629.41	726.37	815.9	771	471.65	635.72	545.6	354.2	537.84	442.6
ILL.sufD-BSU32700.18~1331	638.31	719.86	674.88	924.31	985.37	954.93	591.39	691.44	630.82	483.99	573.29	522.22
ILL.sufS-BSU32690.1~1221	525.82	642.15	578.94	912.59	958.02	935.47	480.87	569.93	517.93	274.43	380.03	324.26
ILL.suhB-BSU14670.24~821	41.71	41.29	41.59	65.58	56.76	61.24	22.31	39.55	30.43	36.63	57.19	46.54
ILL.sul-BSU00770.1~858	74.13	71.46	73.09	166.02	155.77	161.02	73.01	79.47	75.39	46.35	137.38	92.16
ILL.sumT-BSU15610.99~872	42.65	24.21	34.44	314.38	429.09	371.29	15.79	13.18	14.33	4.15	22.72	13.53
ILL.sunA-BSU21480.55~225	269.74	570.34	403.81	1489.15	1233.41	1363.36	122.18	79.97	101.34	99.21	78.22	88.09
ILL.sunI-BSU21490.18~335	402.28	316.02	364.63	158.27	546.31	350.36	64.09	210.68	134.45	215.67	349.7	280.75
ILL.sunT-BSU21470.58~2175	15.16	23.46	18.91	11.09	16.88	13.96	0.72	1.04	0.87	1.05	0.91	0.96
ILL.swrC-BSU06710.5~3202	136.9	179.92	156.41	114.46	123.59	119.03	89.51	144.22	115.06	33.78	110.33	72.27
ILL.tadA-BSU00180.86~571	717.71	180.28	478.88	925.78	255.17	594.26	1949.74	223.94	1076.45	2664.09	1032.13	1797.75
ILL.tagA-BSU35750.64~834	225.63	279.73	250.17	156.52	180.63	168.52	99.49	223.88	159.89	284.55	463.69	372.97
ILL.tagB-BSU35760.33~1178	70.24	93.35	80.63	77.39	159.44	118.04	13.4	81.04	46.35	102.77	261.46	182.07
ILL.tagC-BSU35770.5~1333	8.39	8.2	8.29	5.77	5.81	5.8	5.57	7.84	6.61	20.94	35.44	28.01
ILL.tagD-BSU35740.114~503	607.14	654.29	629.35	292.5	423.84	357.63	251.45	597.74	417.32	342.27	579.33	458.05
ILL.tagE-BSU35730.161~2182	118.61	123.35	120.97	234.87	354.05	293.97	48.67	234.21	139.33	154.34	252.84	202.27
ILL.tagF-BSU35720.1~2241	148.61	159.51	153.79	406.94	539.04	472.5	86.73	260.87	171.06	124.58	201.23	161.79
ILL.tagG-BSU35710.165~992	90.75	101.12	95.52	338.9	508.12	422.81	51.42	196.41	121.99	78.78	186.86	132.68
ILL.tagH-BSU35700.1~1584	166.92	198.55	181.41	707.73	935.15	820.6	112.7	343.9	224.83	118.15	284.39	201.15
ILL.tagO-BSU35530.63~1139	147.61	218	179.21	160.81	190.29	175.47	155.92	306.63	227.61	106.89	122.9	113.18
ILL.tasA-BSU24620.14~799	8.92	17.19	12.63	1.86	2.1	1.98	0.71	1.29	0.98	0.54	1.79	1.17
ILL.tatAC-BSU17710.24~212	136.52	172.09	152.66	283.72	224.49	254.56	137.12	177.01	153.49	164.82	122.19	141.99
ILL.tatAD-BSU02630.13~225	0.66	2.2	1.35	4.09	3.19	3.65	1.13	2.86	1.95	1.84	7.83	4.84
ILL.tatAY-BSU05980.22~195	344.68	303.18	327.07	447.12	336.45	392.61	259.36	320.33	281.97	601.48	276	433.86
ILL.tatCD-BSU02640.1~729	0.31	0.26	0.29	0.79	0.98	0.89	0.93	0.83	0.87	0.82	3.25	2.04
ILL.tatCY-BSU05990.1~765	135.09	127.39	131.93	152.04	126.25	139.34	97.83	125.51	110.16	262.78	94.9	173.66
ILL.tcyA-BSU03610.1~807	280.41	240.19	262.88	123.43	126.16	124.84	107.33	199.57	151.65	98.53	197.95	147.99
ILL.tcyB-BSU03600.1~705	128.78	115.91	123.26	107.1	127.64	117.31	60.62	110.93	84.67	47.75	121.44	84.57
ILL.tcyC-BSU03590.1~744	123.82	116.58	120.84	103.56	105.76	104.69	76.49	111.74	92.67	54.09	99.93	76.72
ILL.tcyJ-BSU29380.2~811	0.09	0.11	0.1	0.1	0.15	0.13	0.1	0	0.05	0.22	1.71	0.97
ILL.tcyK-BSU29370.12~824	0.04	0.22	0.12	0.57	0.29	0.43	0.05	0.23	0.14	0.32	0.89	0.6
ILL.tcyL-BSU29360.1~720	0.05	0	0.03	0.38	0.06	0.22	0	0.11	0.05	0.3	0.23	0.26
ILL.tcyM-BSU29350.1~708	0.05	0.13	0.09	0.18	0.06	0.12	0.11	0	0.06	0	0.06	0.03
ILL.tcyN-BSU29340.1~780	0.14	0.18	0.16	0.42	0.37	0.4	0.15	0	0.07	0.06	0.05	0.06
ILL.tcyP-BSU09130.17~1408	157.42	55.54	112.18	52.24	40.35	46.37	77.22	79.28	77.19	11.33	134.34	73.79
ILL.tdh-BSU16990.106~1149	49.8	40.31	45.63	33.78	34.33	34.07	114.58	69.66	90.87	220.01	96.17	153.88
ILL.tdk-BSU37060.89~676	71.86	113.34	90.49	114.39	122.56	118.49	222.99	847.63	526.32	1202.36	2273.9	1728.99
ILL.tenA-BSU11650.79~789	2.81	3.25	3.01	7.87	7.51	7.69	2.93	4.31	3.57	6.69	19.87	13.3
ILL.tenI-BSU11660.1~618	3.74	3.92	3.83	9.82	9.81	9.82	2.68	5.78	4.2	6.11	24.02	15.12
ILL.tepA-BSU16790.56~793	2.79	4.82	3.7	32.6	35.49	34.04	8.1	20.39	14.09	16.08	134.48	76.32
ILL.tetB-BSU40770.122~1498	33.31	34.95	34.12	35.81	44.32	40.04	18.81	31.35	24.68	21.24	20.8	20.71
ILL.tgl-BSU31270.158~895	2.42	2.75	2.57	2.48	3.11	2.79	1.85	2.63	2.21	2.08	2.09	2.06
ILL.tgt-BSU27710.27~1172	198.34	218.31	207.68	174.65	181.76	178.25	165.7	254.39	206.88	58.09	147.49	102.75
ILL.thiC-BSU08790.133~1905	5.95	8.2	6.97	41.82	47.53	44.66	11.34	13.75	12.36	133.9	305.56	219.44
ILL.thiD-BSU38020.15~830	151.56	164.23	157.54	309.92	275.28	292.91	94.79	138.98	115.07	73.42	77.64	74.48
ILL.thiE-BSU38290.1~669	45.59	58.89	51.63	44.43	40.75	42.63	55.44	56.01	54.87	34.81	29.08	31.35
ILL.thiF-BSU11700.1~1011	4.15	4.89	4.49	8.8	11.68	10.23	5.53	6.74	6.05	6.53	17.67	12.11
ILL.thiG-BSU11690.1~771	2.99	5.22	3.99	9.25	9.77	9.51	3.83	5.62	4.66	8.7	21.27	15.11
ILL.thiL-BSU05900.107~1084	53.6	55.54	54.58	378.95	338.25	358.97	49.49	343.7	193.35	290.18	1386.93	844.05
ILL.thiM-BSU38300.8~826	34.83	41.38	37.83	32.89	31.85	32.39	44.06	41.54	42.33	23.49	21.4	22.17
ILL.thiN-BSU15800.73~717	38.14	41.78	39.85	192.68	180.47	186.72	43.62	98.38	69.49	27.02	45.62	36.07
ILL.thiO-BSU11670.1~1110	2.52	4.04	3.21	7.86	7.99	7.93	3.64	4.47	4	5.11	16.49	10.83
ILL.thiS-BSU11680.1~201	7.87	8.13	8	13.26	16.17	14.7	1.84	8.29	4.84	7.1	35.18	21.56
ILL.thiT-BSU30990.100~678	22.04	26.19	23.94	5.21	7.03	6.11	11.03	31.84	21.08	5.12	34.14	19.79
ILL.thiU-BSU13240.97~699	2.76	2.53	2.66	7.75	9.32	8.53	2.7	3.84	3.22	32.72	58.38	45.27
ILL.thiV-BSU13230.2~601	1.47	3.07	2.19	13.71	10.61	12.18	3.06	2.89	2.94	30.11	60.35	45.06
ILL.thiW-BSU13220.1~1644	2.25	2.89	2.54	11.54	11.78	11.67	3.35	3.73	3.5	19.89	45.97	32.89
ILL.thiX-BSU13210.1~765	2.77	3.5	3.1	12.45	14.54	13.49	3.55	4.2	3.82	18.87	49.29	34.07
ILL.thrB-BSU32240.1~930	57.34	79.47	67.31	912.89	838.68	876.55	22.54	28.88	25.34	13.78	16.19	14.77
ILL.thrC-BSU32250.1~1059	65.98	89.1	76.46	921.82	850.32	886.83	22.34	28.3	24.9	13.65	18.5	15.93
ILL.thrS-BSU28950.44~1975	284.79	296.72	290.71	47.13	42.04	44.63	222.59	406.3	309.85	245.55	907	578.77
ILL.thrZ-BSU37560.54~1970	4.07	3.22	3.7	3.16	1.4	2.29	2.49	4.48	3.43	0.87	6.23	3.57
ILL.thyA-BSU17680.22~861	34.49	32.31	33.38	40.37	43.53	41.95	14.04	33.18	23.32	9.47	19.77	14.62
ILL.thyA-BSU21820.84~878	63.5	77.91	70.08	227.44	235.27	231.41	55.4	115.02	84.26	135.32	150.07	140.99
ILL.tig-BSU28230.84~1358	1698.9	2028.56	1849.61	872.63	981.38	926.84	1178.59	2199.26	1662.78	607.54	1140.93	870.53
ILL.tilS-BSU00670.1~1419	140.83	153.48	146.73	114.9	132.08	123.45	62.09	172.89	115.82	102.2	355.59	230.1
ILL.tkt-BSU17890.1~2004	666.36	790.78	723.38	732.66	577.57	656.21	659.44	897.04	767.84	453.53	497.03	469.13
ILL.tlp-BSU18030.37~288	1.95	1.36	1.69	27.56	38.27	32.87	1.26	1.17	1.2	7.87	7.88	7.84
ILL.tlpA-BSU31250.5~1993	1.53	2.18	1.82	33.53	41.05	37.27	1.04	2.19	1.59	0.7	1.22	0.95
ILL.tlpB-BSU31230.1~1989	25.42	33.18	28.94	280.16	274.93	277.69	2.66	8.52	5.5	1.09	1.62	1.34
ILL.tlpC-BSU03440.11~1732	13.74	16.36	14.94	41.89	40.91	41.42	5.99	8.3	7.04	1.5	2.09	1.78
ILL.tmk-BSU00280.1~639	84	79.96	82.37	159.73	173.78	166.75	87.77	257.06	169.83	175.32	1048.62	616.81
ILL.tmrB-BSU03140.5~598	11.3	12.5	11.86	9.55	7.6	8.59	12.1	14.89	13.27	14.88	9.83	12.08
ILL.tnrA-BSU13310.1~333	27.23	32.92	29.74	37.71	34.72	36.25	11.44	33.33	24.68	37.59	39.2	37.85
ILL.topA-BSU16120.1~2076	148.23	164.34	155.74	176.74	206.98	191.79	86.22	148.86	115.79	54.21	144.69	99.51
ILL.topB-BSU04260.14~2197	59.83	71.03	64.87	83.76	88.72	86.25	44.58	74.8	58.81	22.23	126.66	75.5
ILL.tpiA-BSU33920.19~780	615.86	645.2	629.73	504.97	359.35	433.12	802.29	770.01	772.81	64.68	162.9	113.65
ILL.tpx-BSU29490.14~517	546.59	616.02	573.51	614.23	295.81	456.91	552.17	546.39	534.88	865.21	365.83	593.95
ILL.treA-BSU07810.1~1686	445.73	399.25	425.74	593.67	656.37	624.96	366.08	778.39	564.98	86.71	295.55	191.97
ILL.treP-BSU07800.1~1413	564.09	532.35	551.04	452.4	439.91	446.41	381.01	770.26	566.66	143.74	321.45	232.19
ILL.treR-BSU07820.14~730	550.39	532.33	543.35	756.3	743.88	750.48	679.18	1086.13	864.76	156.07	380.52	267.97
ILL.trmB-BSU29900.1~642	294.25	338.09	314.46	219.38	260.53	239.84	183.15	446.46	309.43	193.17	455.12	323.17
ILL.trmD-BSU16030.1~732	172.89	205.69	187.86	399.39	451.88	425.54	409.18	612.67	518.74	183.96	1103.2	667.24
ILL.trmE-BSU41020.112~1491	145.81	142.69	144.71	100.45	128.42	114.33	72.46	134.14	101.78	51.16	168.81	110.31
ILL.trmK-BSU25180.86~736	73.6	95.79	83.56	105.35	121.93	113.6	95.7	126.55	108.7	101.54	144.74	121.61
ILL.trpA-BSU22630.1~804	78.74	87.36	82.75	144.54	162.18	153.34	67.57	66.33	66.02	39.65	63.63	51.29
ILL.trpB-BSU22640.1~1203	0.96	1.3	1.12	5.63	5.95	5.79	0.82	1.5	1.15	2.98	6.24	4.6
ILL.trpC-BSU22660.1~750	0.4	0.94	0.65	2.3	3.13	2.71	0.32	0.69	0.5	2.13	4	3.05
ILL.trpD-BSU22670.1~1017	0.42	1.62	0.96	4.12	6.27	5.18	0.41	2.38	1.37	4.79	10.35	7.55
ILL.trpE-BSU22680.141~1688	3.43	5.58	4.36	18.88	21.58	20.22	1.85	13.82	7.87	21.69	34.12	27.76
ILL.trpF-BSU22650.1~648	0.36	0.23	0.3	1.51	1.74	1.62	0	0.32	0.16	0.22	1.99	1.11
ILL.trpP-BSU10010.30~548	257.5	376.5	310.98	676.43	547.2	612.77	164.89	270.05	214.35	314.61	227.61	266.21
ILL.trpS-BSU11420.59~1051	124.21	157.39	139.31	168.36	162.79	165.68	89.21	159.52	122.34	164.32	234.18	197.42
ILL.truA-BSU01480.1~744	313.83	411.92	358.35	387.45	1058.37	719.69	828.36	1632.76	1213.21	19	134.43	77.71
ILL.truB-BSU16660.82~1011	44.41	40.72	42.86	96.64	91.44	94.11	49.19	79.42	63.2	44.34	168.62	107.18
ILL.trxA-BSU28500.1~315	656.62	771.6	708.99	510.04	416.13	463.8	389.71	718.71	545.37	1144.95	803.3	957.09
ILL.trxB-BSU34790.193~1143	125.34	162.95	142.35	540.19	831.23	684.48	94.86	495.51	290.86	444.37	793.65	616.12
ILL.tsf-BSU16500.102~983	2137.28	2681.83	2384.93	1078.35	1319.25	1198.06	1698.38	2663.04	2152.24	552.25	1278.41	914.51
ILL.tuaB-BSU35600.812~2263	0.92	0.64	0.8	7.39	7.87	7.63	0.72	0.66	0.68	1.32	1.35	1.32
ILL.tuaC-BSU35590.1~1170	1.93	2.05	1.99	11.04	11.93	11.49	1.25	1.34	1.28	1.3	2.11	1.69
ILL.tuaD-BSU35580.1~1386	2.26	2.06	2.18	11.94	14.74	13.33	1.49	1.84	1.64	1.07	1.73	1.39
ILL.tuaE-BSU35570.1~1467	2.48	2.64	2.56	10.37	12.58	11.47	1.15	1.87	1.49	1.41	1.82	1.6
ILL.tuaF-BSU35560.29~709	3.04	3.03	3.01	12.65	13.94	13.3	1.98	1.94	1.96	1.17	0.98	1.06
ILL.tuaG-BSU35550.7~765	3.08	3.58	3.31	13.49	16.75	15.11	1.48	3.89	2.64	0.51	2.19	1.36
ILL.tuaH-BSU35540.1~1194	3.09	3.36	3.22	11.75	11.93	11.84	1.17	2.04	1.58	0.64	1.49	1.06
ILL.tufA-BSU01130.23~1213	10459.1	11614.9	10997.6	6881.41	9285.94	8074.57	7651.26	9204.28	8306.12	1581.33	2869.89	2214.77
ILL.tyrA-BSU22610.49~1164	103.46	121.5	111.71	134.87	119.55	127.35	77.41	90.98	83.24	33.01	55.98	44.28
ILL.tyrS-BSU29670.189~1457	206.27	224.73	214.75	49.57	42.52	46.1	129.21	200.62	161.05	56.24	277	166.93
ILL.tyrZ-BSU38460.42~1283	3.18	2.95	3.08	1.5	1.12	1.31	3.69	12.36	7.91	5.27	20.74	13.14
ILL.ubiD-BSU03640.1~1422	2.59	3	2.78	2.12	3.01	2.56	2.51	2.9	2.66	1.4	2.37	1.87
ILL.ubiE-BSU22750.7~708	134.55	171.34	151.28	258.9	276.1	267.52	151.98	326.55	235.61	136.02	462	299.82
ILL.udk-BSU27330.7~642	330.33	425.77	373.69	212.5	285.81	248.88	365.71	630.95	491.36	140.09	519.13	330.98
ILL.ugtP-BSU21920.1~1149	158.93	184.48	170.68	255.51	295.92	275.62	69.6	167.51	116.74	52.66	124.76	88.59
ILL.ung-BSU37970.14~691	60.17	74.91	66.89	73.78	74.42	74.13	50.58	57.05	53.09	32.12	51.89	41.78
ILL.upp-BSU36890.135~764	497.79	604.18	546.4	286.19	305.3	295.77	395.33	573.75	477.55	136.51	486.18	312.46
ILL.uppS-BSU16530.131~913	160.43	178.43	168.64	480.4	502.55	491.57	209.38	449.68	324.1	209.8	647.48	429.29
ILL.ureA-BSU36660.819~1136	0.65	0.39	0.54	2.49	2.74	2.61	0.33	0.26	0.29	0.79	0.77	0.77
ILL.ureB-BSU36650.1~375	2.71	2.09	2.44	7.57	7.59	7.58	1.74	2.07	1.88	2.78	4.11	3.42
ILL.ureC-BSU36640.1~1710	3.91	5.33	4.55	8.48	7.63	8.06	4.62	3.81	4.15	3.46	4.94	4.17
ILL.usd-BSU36430.204~314	0.84	0.21	0.56	0	0	0	0	0.36	0.17	0.2	0.38	0.29
ILL.uvrA-BSU35160.8~2881	69.8	84.65	76.58	213.67	210.68	212.28	75.12	88.51	80.57	70.57	91.51	80.24
ILL.uvrB-BSU35170.79~2064	52.04	53.89	52.97	115.95	118.04	117.04	49.44	52.99	50.46	70.91	79.9	74.47
ILL.uvrC-BSU28490.21~1793	26.83	29.68	28.16	22.65	23.32	22.99	21.23	34.71	27.51	42.57	58.42	50.01
ILL.uvrX-BSU21500.1~1251	0.69	0.62	0.66	2.63	2.99	2.81	0.32	0.58	0.5	3.9	3.97	3.91
ILL.uvsE-BSU37200.1~963	0.87	1.03	0.94	0.65	0.58	0.62	0.39	0.83	0.6	0.72	0.76	0.73
ILL.uxaA-BSU12390.1~1494	1.45	1.02	1.26	1.68	2.02	1.85	1.89	2.3	2.06	2.39	1.81	2.06
ILL.uxaB-BSU12380.1~1443	0.83	1.21	1	1.13	1.21	1.17	1.32	2.08	1.67	1.86	2.52	2.17
ILL.uxaC-BSU12300.1~1422	6.25	4.17	5.33	1.65	0.99	1.32	13.55	16.99	15.04	91.95	24.11	56.14
ILL.uxuA-BSU12340.1~1080	0.26	0.45	0.35	0.6	0.69	0.65	0.41	0.49	0.44	0.83	1.56	1.19
ILL.valS-BSU28090.60~2702	133.94	122.51	129.06	28.05	26.87	27.48	86.91	120.47	102.19	7.84	45.69	27.01
ILL.veg-BSU00440.40~300	1196.78	2212.09	1652.46	1273.2	1172.15	1223.78	2479.9	2152.5	2292.43	1470.2	2580.92	2013.02
ILL.vmlR-BSU05610.216~1859	18.66	15.6	17.33	298.78	527.8	412.27	30.99	84.59	56.93	73.78	116.27	94.36
ILL.vpr-BSU38090.26~2446	0.95	1.31	1.12	4.71	2.66	3.7	1.14	1.08	1.09	0.97	0.59	0.76
ILL.walH-BSU40390.1~1368	63.67	72.45	67.73	132.76	168.18	150.35	64.33	267.84	163.66	142.6	1544.96	856.33
ILL.walK-BSU40400.3~1838	33.66	46.22	39.35	64.28	83.74	73.94	38.04	175.94	105.35	105.7	1102.07	611.44
ILL.walR-BSU40410.299~1006	51.44	62.81	56.53	91.26	102.3	96.76	58.58	359.07	205.79	275.78	2780.2	1547.5
ILL.wapA-BSU39230.24~7028	869.4	932.17	899.24	600.33	367.64	485.41	228.58	324.25	272.5	3.75	6.69	5.19
ILL.whiA-BSU34750.23~973	123.93	143.06	132.72	397.48	711.32	552.99	82.16	168.93	123.74	235.76	1171.46	709.41
ILL.wprA-BSU10770.19~2703	961.85	1098.98	1025.1	1087.59	976.72	1033.18	462.42	708.29	576.33	53.93	213.2	134.25
ILL.xepA-BSU12780.1~840	8.06	5.46	6.92	3.42	3.81	3.61	2.96	4.72	3.79	3.56	7.75	5.64
ILL.xerC-BSU16140.1~915	168.78	204.84	185.26	248.34	310.75	279.34	116.18	259.54	184.4	52.76	190.7	122.21
ILL.xerD-BSU23510.7~897	47.24	55.79	51.16	153.38	165.12	159.25	93.89	231.11	159.95	157.02	316.62	236.01
ILL.xhlA-BSU12790.1~270	21.85	13.21	18.04	10.33	10.81	10.57	7.22	16.21	11.35	14.99	28.81	21.66
ILL.xhlB-BSU12800.1~264	14.24	12.3	13.41	11.93	8.78	10.38	6.72	11.12	8.65	12.8	23.58	17.96
ILL.xkdA-BSU12500.126~722	7.23	8.54	7.83	58.59	51.04	54.88	6.14	15.96	10.85	18.3	42.22	30.21
ILL.xkdB-BSU12520.1~837	2.31	1.98	2.17	1.29	0.98	1.14	0.32	0.84	0.57	1.17	1.35	1.27
ILL.xkdC-BSU12530.1~801	3.09	2.67	2.91	1.67	1.39	1.53	0.68	1.67	1.16	1.63	1.95	1.77
ILL.xkdD-BSU12540.1~351	2.15	3.39	2.71	2.49	1.27	1.89	1.33	1.99	1.64	1.03	2.61	1.82
ILL.xkdE-BSU12590.1~1488	9.03	7.83	8.51	4.22	4.03	4.13	3.69	5.47	4.57	3.77	8.01	5.91
ILL.xkdF-BSU12600.15~842	14.84	12.74	13.93	7.94	6.02	7	7.26	9.74	8.38	7.09	15.9	11.47
ILL.xkdG-BSU12610.26~961	16	12.05	14.26	8.02	6.73	7.38	6.76	8.94	7.74	10.25	14.05	12.04
ILL.xkdH-BSU12620.1~357	14.81	11.64	13.43	7.73	5.88	6.82	7.64	7.31	7.17	8.35	14.61	11.41
ILL.xkdI-BSU12630.1~486	15.93	13.19	14.74	9.17	6.62	7.91	9.6	9.89	9.66	9.55	18.8	14.11
ILL.xkdJ-BSU12640.1~441	17.59	12.87	15.52	11.1	6.23	8.69	8.23	9.18	8.59	10.36	15.84	13
ILL.xkdK-BSU12650.1~1401	15.8	11.18	13.77	9.35	8.24	8.81	7.67	13.06	10.21	11.15	18.35	14.66
ILL.xkdM-BSU12660.2~445	24.34	16.72	20.72	12.92	11.52	12.23	9.24	16.58	12.7	17.48	30.9	24
ILL.xkdN-BSU12671.74~520	10.76	8.88	9.94	4.84	3.64	4.25	3.59	7.23	5.4	6.12	8.44	7.21
ILL.xkdO-BSU12680.1~3999	8.78	6.57	7.81	6.27	5.61	5.95	3.61	4.94	4.22	3.37	9.14	6.26
ILL.xkdP-BSU12690.1~660	8.88	4.87	7.1	5.48	4.96	5.22	3.78	3.89	3.76	3.39	6.9	5.03
ILL.xkdQ-BSU12700.1~978	6.58	4.77	5.76	4.11	4.56	4.33	1.51	2.61	2.01	2.44	7.5	4.98
ILL.xkdR-BSU12710.1~267	5.15	5.84	5.47	6.63	2.87	4.77	1.67	2.28	2.07	2.79	9.65	6.21
ILL.xkdS-BSU12720.57~482	6.9	4.01	5.62	4.36	4.16	4.26	1.39	2.09	1.72	2.79	7.2	4.99
ILL.xkdT-BSU12730.1~1047	4.85	3.43	4.23	4.35	3.12	3.75	1.64	1.87	1.73	1.6	4.2	2.9
ILL.xkdU-BSU12740.1~579	7.36	5.13	6.38	5.6	4.49	5.05	2.11	2.74	2.39	3.36	5.94	4.62
ILL.xkdV-BSU12750.1~2064	8.21	5.16	6.86	3.85	3.79	3.82	1.41	2.83	2.09	1.82	4.58	3.2
ILL.xkdW-BSU12760.1~330	11.44	7.71	9.8	4.31	4.58	4.45	2.45	4.76	3.63	3.04	4.34	3.66
ILL.xkdX-BSU12770.1~165	10.06	7.89	9.12	3.23	3.77	3.5	2.09	5.6	3.73	4.96	9.28	7.07
ILL.xkzA-BSU12749.1~273	11.92	9.91	11.05	8.41	8.6	8.51	2.71	3.1	2.87	1.58	4.8	3.31
ILL.xkzB-BSU12672.16~165	23.86	12.29	18.8	7.97	12.2	10.07	0	12.81	5.62	1.02	24.78	12.54
ILL.xlyA-BSU12810.1~894	15.04	9.71	12.69	11.16	11	11.09	7.49	11.06	9.12	17.29	22.13	19.56
ILL.xlyB-BSU12460.121~1074	4.11	3.46	3.83	1.29	1.61	1.45	2.95	4.85	3.84	8.25	8.82	8.41
ILL.xpaC-BSU00250.24~638	42.88	35.07	39.48	42.14	50.89	46.49	37.15	186.19	109.72	160.99	884.29	526.32
ILL.xpf-BSU12560.1~510	3.65	3.4	3.54	1.61	0.92	1.27	1.12	0.7	0.94	0.7	1.69	1.19
ILL.xpt-BSU22070.89~673	22.62	25.06	23.76	3.5	4.34	3.92	20.01	57.14	38.02	7.57	19.79	13.71
ILL.xre-BSU12510.26~367	67.97	89.51	77.73	96.15	94.38	95.32	91.11	94.55	90.33	59.15	72.53	65.17
ILL.xsa-BSU28510.92~1579	4.04	2.67	3.43	5.16	6.14	5.65	7.63	8.65	8.02	50.6	9.16	28.74
ILL.xseA-BSU24300.128~1474	38.01	46.83	41.89	56.64	72.33	64.43	23.55	90.21	55.76	33.57	89.48	61.41
ILL.xseB-BSU24290.1~255	49.35	49.74	49.21	55.24	78.25	66.65	29.04	93.8	59.65	28.45	85.03	57.05
ILL.xtmA-BSU12570.63~860	11.38	11.73	11.54	4.17	3.17	3.68	4.04	6.02	4.91	5.52	9.59	7.44
ILL.xtmB-BSU12580.1~1302	12.47	8.95	10.88	5.37	3.73	4.56	3.79	5.71	4.67	4.83	9.12	6.96
ILL.xtrA-BSU12550.1~207	8.26	9.1	8.52	5.83	4.06	4.96	3.47	5.8	4.55	11.58	8.64	9.97
ILL.xylA-BSU17600.66~1403	72.65	75.34	74	22.32	32.18	27.21	53.64	108.95	79.97	15.23	13.73	14.25
ILL.xylB-BSU17610.1~1500	32.54	30.12	31.49	10.17	10.92	10.54	18.76	47.35	32.5	2.15	3.95	3.04
ILL.xylR-BSU17590.110~1162	21.7	26.73	23.99	23.03	31.18	27.07	7.43	26.1	16.5	11.08	16.61	13.74
ILL.xynA-BSU18840.219~860	112.52	146.78	128.07	50.76	70.64	60.62	84.83	112.01	97	73.45	54.04	62.53
ILL.xynB-BSU17580.7~1608	7.06	5.18	6.24	6.33	7.94	7.13	4.18	8.71	6.35	4.65	2.52	3.5
ILL.xynC-BSU18150.1~1269	8.83	8.67	8.77	14.81	18.69	16.74	4.87	5.44	5.08	4.05	4.88	4.41
ILL.xynD-BSU18160.303~1844	4.76	5.55	5.13	9.58	11.8	10.68	3.2	3.15	3.13	2.53	2.79	2.62
ILL.xynP-BSU17570.1~1392	5.03	3.66	4.43	3.96	5.63	4.79	3.79	6.46	5.07	5.96	1.48	3.59
ILL.yaaA-BSU00030.131~346	162.88	146.99	155.9	268.32	340.44	304.13	102.69	194.36	148.31	141	205.92	174.35
ILL.yaaB-BSU00050.9~254	184.98	237.16	208.67	233.56	386.94	309.55	103.59	263.63	179.86	102.95	199.22	150.31
ILL.yaaC-BSU00080.121~1068	0.52	0.77	0.64	0.67	0.4	0.54	0.03	0.14	0.08	0.71	0.89	0.79
ILL.yaaD-BSU00110.4~888	385.58	434.33	408.11	667.85	644.63	656.65	281.92	322.33	297.86	198.6	387.01	291.66
ILL.yaaE-BSU00120.22~612	605.26	674.74	637.58	908.55	1027.63	967.89	371.29	487.17	423.18	262.57	592.79	426.99
ILL.yaaH-BSU00160.70~1353	1.28	0.94	1.13	1	0.89	0.94	1.07	1.72	1.38	3.25	1.17	2.14
ILL.yaaI-BSU00170.1~546	1.13	1.03	1.09	0.9	0.84	0.87	1.02	1.52	1.25	4.08	0.94	2.39
ILL.yaaK-BSU00200.24~347	387.57	432.87	408.55	373.77	425.29	399.43	275.86	501.44	380.49	277.93	1157.21	719.29
ILL.yaaL-BSU00220.1~225	120.53	149.95	133.91	204.56	188.17	196.55	106.69	219.65	159.58	198.01	684.24	439.88
ILL.yaaN-BSU00260.1~1161	44.8	41.16	43.27	59.74	65.5	62.61	42.06	199.57	119.46	208.94	998.35	609.49
ILL.yaaO-BSU00270.46~1488	74.36	64.66	70.17	122.13	119.92	121.09	99.81	224.48	159.69	233.81	1094.91	668.73
ILL.yaaQ-BSU00290.33~362	207.79	161.47	186.87	317.07	306.84	312.15	191.66	357.53	285.97	306.09	1274.3	857.52
ILL.yaaR-BSU00300.13~453	129.93	121.53	126.45	245.55	233.87	239.88	110.74	242.83	173.7	195.36	906.87	553.82
ILL.yaaT-BSU00320.1~828	200.89	201.25	201.42	302.65	307.04	304.95	150.83	355.46	248.56	150.91	890.19	524.62
ILL.yabA-BSU00330.1~360	290.67	287.23	289.68	360.55	424.57	392.39	192.33	479.33	329.3	203.93	1236.18	723.88
ILL.yabB-BSU00340.59~802	44.44	46.87	45.62	171.84	196.96	184.35	38.19	124.94	80.07	68.27	571.4	323.39
ILL.yabC-BSU00360.1~879	64.46	78.43	70.84	213.17	257.71	235.3	59.3	189.88	122.59	73.95	684.07	383.16
ILL.yabD-BSU00390.79~846	44.1	44.41	44.33	192.99	212.23	202.6	25.22	72.85	48.39	73.29	344.58	210.35
ILL.yabE-BSU00400.1~1314	151.93	170.06	160.35	296.22	287.32	291.94	73.26	225.45	147.07	105.46	406.79	257.36
ILL.yabG-BSU00430.1~873	2.36	3.61	2.93	14.08	17.31	15.68	9.47	58.03	33.13	32.64	359.62	198.45
ILL.yabJ-BSU00480.1~378	353.96	392.01	371	270.09	349.51	309.51	200.67	443.44	315.99	337.31	1631.21	990.83
ILL.yabK-BSU00540.60~290	105.54	128.81	115.82	152.36	149.28	150.9	91.19	165.03	125.38	50.7	175.82	113.23
ILL.yabM-BSU00570.50~1648	18.56	20.39	19.42	30.09	37.51	33.77	22.88	42.28	32.1	14.69	59.23	37.15
ILL.yabN-BSU00580.1~1470	66.56	72.36	69.18	123.73	148.43	136.01	53.45	82.46	66.72	15.52	65.17	40.54
ILL.yabO-BSU00590.3~263	187.62	201.3	194.01	335.14	509.43	421.53	128.37	206.96	161.15	35.04	170.12	101.83
ILL.yabP-BSU00600.79~381	160.68	161.42	161.28	263.32	397.09	329.63	101.81	168.42	136.21	23.09	115.32	69.57
ILL.yabQ-BSU00610.1~636	67.26	81.04	73.53	123.89	174.93	149.21	45.21	100.34	71.25	9.39	55.7	32.9
ILL.yabR-BSU00630.1~387	1339.24	1653.38	1482.38	857.9	902.78	880.49	803.09	1668.63	1212.9	587.94	994.16	785.38
ILL.yabS-BSU00650.1~738	10.38	14.61	12.29	15.39	17.54	16.46	10.28	52.04	30.62	20.45	444.73	235.84
ILL.yabT-BSU00660.1~1017	4.93	6.16	5.44	6.11	9.06	7.57	5.32	30.8	17.83	7.34	289.25	151.07
ILL.yacD-BSU00720.47~940	82.78	74.99	79.39	47.22	40.19	43.76	48.61	117.43	81.77	47.93	327.22	189.49
ILL.yacK-BSU00880.4~1086	27.56	28.83	28.19	67.97	75.94	71.94	15.01	48.39	31.22	15.53	125.59	71.37
ILL.yacL-BSU00890.1~1101	44.86	46.97	45.9	75.25	91.8	83.48	32.53	58.71	44.87	24.34	83.77	54.23
ILL.yacP-BSU00970.7~519	78.64	80.43	79.61	120.42	155.45	137.81	35.1	54.94	44.74	9.48	44.82	27.46
ILL.yajC-BSU27700.20~286	1368.16	1484.01	1422.15	873.82	623.98	750.59	2206.75	2154.16	2146.9	585.23	837.13	706.16
ILL.yazA-BSU00350.1~300	49.13	56.54	52.44	156.17	184.39	170.2	38.87	126.82	81.88	49.69	476.4	266.28
ILL.yazB-BSU00800.1~210	245.87	236.53	242.07	270.64	369.6	319.71	182.2	259.05	214.54	70.52	342.26	205.58
ILL.ybaC-BSU01140.12~968	31.61	29.71	30.82	33.27	56.44	44.75	126.73	245.19	184.97	32.85	444.25	242.53
ILL.ybaF-BSU01470.1~798	88.03	106.61	96.52	184.38	340.87	261.91	95.29	299.75	194.33	17.75	76	47.14
ILL.ybaJ-BSU01510.16~783	69.25	88.7	77.86	76.52	68.26	72.46	36.86	98.68	66.8	62.93	397.15	233.83
ILL.ybaK-BSU01520.1~444	1.51	2	1.73	4.79	7	5.89	0.73	4.7	2.65	10.12	81	45.93
ILL.ybaN-BSU01570.75~839	0.27	0.05	0.17	0.19	0.24	0.22	0.09	0.09	0.09	0.21	0.2	0.2
ILL.ybaR-BSU01580.129~1565	56.36	63.27	59.57	45.81	61.51	53.6	32.35	111.46	70.8	23.31	223.2	124.71
ILL.ybaS-BSU01590.82~1002	28.74	34.59	31.42	29.2	28.51	28.87	45.23	58.29	51.01	28.01	134.33	81.69
ILL.ybbA-BSU01600.1~753	18.12	19.6	18.74	11.64	7.34	9.51	11.86	17.85	14.56	1.91	4.03	2.96
ILL.ybbB-BSU01640.12~1601	23.44	17.99	20.93	12.12	6.84	9.51	31.2	19.68	25.05	10.33	6.04	7.95
ILL.ybbC-BSU01650.14~1258	5.12	4.58	4.89	1.72	0.88	1.31	0.75	1.59	1.15	2.81	1.86	2.3
ILL.ybbD-BSU01660.1~1929	4.21	4.18	4.2	1.65	0.98	1.32	0.75	1.37	1.04	2.3	1.51	1.86
ILL.ybbE-BSU01670.33~1358	4.96	3.83	4.44	1.94	1.51	1.73	0.91	0.84	0.84	2.79	1.46	2
ILL.ybbF-BSU01680.25~1392	5.67	5.43	5.56	4.38	2.28	3.34	4.76	1.69	3.18	4.65	1.92	3.21
ILL.ybbH-BSU01690.1~852	17.02	12.67	15.09	13.04	8.05	10.57	16.37	4.89	10.24	12.31	4.36	8.04
ILL.ybbJ-BSU01710.1~483	9.29	5.1	7.44	6.67	5.43	6.06	5.75	3.41	4.53	3.64	2.12	2.82
ILL.ybbK-BSU01720.17~472	13.89	10.62	12.46	18.89	14.57	16.76	13.4	8.02	10.51	8.65	4.54	6.45
ILL.ybbP-BSU01750.65~886	69.83	74.41	72.02	74.63	74.02	74.36	111.96	185.09	146.42	115.15	1244.36	690.36
ILL.ybbR-BSU01760.1~1452	123.11	127.38	125.27	143.72	174.61	159.08	111.41	247.77	176.32	111.66	1562.19	848.41
ILL.ybcC-BSU01845.1~2616	3.96	2.62	3.37	4.37	4.9	4.63	1.89	3.84	2.82	5.59	23.18	14.47
ILL.ybcF-BSU01860.1~528	5.8	5.87	5.85	5.42	7.04	6.23	2.39	7.73	4.97	5.33	26.65	16.09
ILL.ybcH-BSU01870.23~313	6.39	7.14	6.74	5.16	10.73	7.92	1.52	8.25	4.76	3.33	31.56	17.56
ILL.ybcI-BSU01880.33~407	12.65	10.76	11.83	10.35	12.19	11.27	3.85	12.04	7.81	3.19	28.29	15.89
ILL.ybcL-BSU01890.1~1173	7.86	8.83	8.31	8	8.14	8.07	5.96	9.09	7.41	4.54	5.44	4.94
ILL.ybcM-BSU01900.1~315	1.2	1.5	1.34	1.68	2.1	1.89	0.53	2.4	1.43	0.62	1.96	1.29
ILL.ybdG-BSU01990.54~1031	5.42	5.78	5.59	8.07	9.08	8.57	3.31	6.22	4.69	1.63	3.02	2.31
ILL.ybdJ-BSU02000.2~673	5.38	6.39	5.84	10.75	11.17	10.96	1.63	6.04	3.8	2.64	3.85	3.22
ILL.ybdK-BSU02010.21~983	6.02	7.55	6.72	10.06	11.29	10.67	2.8	6.65	4.64	1.57	5.23	3.41
ILL.ybdM-BSU02030.9~779	10.06	7.5	8.88	7.57	8.21	7.89	8.22	9.17	8.5	5.11	8.78	6.9
ILL.ybdN-BSU02040.3~860	6.4	5.17	5.86	6.12	6.63	6.38	4.35	4.43	4.31	3.04	0.82	1.87
ILL.ybdO-BSU02050.16~1200	17.55	20.18	18.73	64.65	82.49	73.51	6	8.12	6.95	2.25	4.02	3.12
ILL.ybdZ-BSU31959.16~225	53.17	43.73	49.08	40.47	15.51	28.14	9.24	6.03	7.6	1.11	1.33	1.21
ILL.ybeC-BSU02120.30~1649	142.64	165.18	153.02	482.29	470.96	476.89	95.98	53.65	73.32	90.04	53.84	70.32
ILL.ybeF-BSU02150.174~422	1.52	2.27	1.86	1.87	2.25	2.06	2.31	2.16	2.21	2.07	4.6	3.33
ILL.ybfA-BSU02160.12~929	2.31	4.38	3.2	6.31	8.17	7.23	4.47	2.11	3.22	3.77	2.39	2.97
ILL.ybfB-BSU02170.1~1251	4.61	4.89	4.74	12.04	11.92	11.98	5.89	3.82	4.77	6.47	3.31	4.77
ILL.ybfE-BSU02180.124~408	40.58	34.74	38.06	2.24	5.73	3.97	3.33	39.04	20.69	3.6	17.49	10.65
ILL.ybfF-BSU02190.5~916	34.45	29.29	31.95	2.97	4.84	3.9	3.5	28.08	15.69	4.69	14.48	9.58
ILL.ybfG-BSU02200.75~2273	14.26	12.99	13.72	6.88	6.5	6.69	9.73	14.41	11.89	14.92	29.95	22.36
[truncated: 2,237 more rows]

## Sheet: Counts
transcript	WT Rep. 1	WT Rep. 2	WT Merged	nusAdep Rep. 1	nusAdep Rep. 2	nusAdep Merged	ΔnusG Rep. 1	ΔnusG Rep. 2	ΔnusG Merged	nusAdep ΔnusG Rep. 1	nusAdep ΔnusG Rep. 2	nusAdep ΔnusG Merged
ILL.aadK-BSU26790.74~928	427	396	823	416	442	858	334	290	621	274	185	459
ILL.aapA-BSU27090.37~1425	1586	1489	3074	1133	1271	2404	321	2244	2566	462	1551	2013
ILL.abfA-BSU28720.1~1503	71	63	134	72	87	159	75	110	185	78	56	134
ILL.abh-BSU14480.27~305	2966	2721	5687	831	772	1603	830	1574	2405	26	399	425
ILL.abnA-BSU28810.1~972	18	12	30	6	10	16	213	47	260	235	66	300
ILL.abnB-BSU39330.134~1543	70	51	121	35	17	52	67	46	113	19	25	44
ILL.abrB-BSU00370.67~357	4572	3940	8512	6050	4520	10570	2781	6251	9032	12809	12697	25513
ILL.accA-BSU29200.1~978	9572	9372	18944	10240	10254	20494	6170	8197	14372	2491	3956	6450
ILL.accB-BSU24350.58~537	5145	4404	9548	2868	3369	6237	3300	4690	7996	1647	2451	4099
ILL.accC-BSU24340.12~1364	17228	16286	33512	11126	12988	24114	12334	17726	30024	5052	8287	13338
ILL.accD-BSU29210.335~1207	9803	9586	19382	9908	10223	20131	6097	8641	14743	2927	4607	7537
ILL.acdA-BSU37170.1~1140	231	185	415	246	267	513	326	368	696	3834	416	4247
ILL.ackA-BSU29470.82~1269	40366	39629	79993	20849	24854	45703	14604	31658	46257	3567	22017	25583
ILL.acoA-BSU08060.1~1002	6	4	10	50	41	91	51	81	131	151	292	443
ILL.acoB-BSU08070.1~1029	7	12	19	57	59	116	103	102	205	192	304	496
ILL.acoC-BSU08080.1~1197	50	58	108	111	150	261	197	188	385	304	444	748
ILL.acoL-BSU08090.21~1397	97	72	169	155	188	343	342	305	647	546	361	907
ILL.acoR-BSU08100.1~1818	731	485	1216	651	717	1368	2930	1476	4405	5841	733	6574
ILL.acpK-BSU17130.1~249	2	1	3	3	5	8	0	0	0	0	4	4
ILL.acpP-BSU15920.3~236	21303	16801	38067	8470	5581	14051	24347	17484	41250	8352	9546	17887
ILL.acpS-BSU04620.42~407	281	224	504	230	240	470	204	280	484	109	366	475
ILL.acsA-BSU29680.16~1734	1793	1365	3144	6000	5756	11756	1601	1497	3102	3773	1631	5392
ILL.acuA-BSU29690.23~655	943	600	1543	1468	1407	2875	823	759	1581	1442	715	2157
ILL.acuB-BSU29700.27~671	1028	727	1755	1681	1492	3173	847	848	1697	1523	746	2269
ILL.acuC-BSU29710.1~1164	1462	1105	2567	2234	2158	4392	1184	1363	2539	1969	833	2801
ILL.adaA-BSU01810.111~746	49	32	81	41	41	82	11	75	88	56	184	244
ILL.adaB-BSU01820.1~540	2364	786	3150	346	484	830	466	683	1150	954	884	1838
ILL.adcA-BSU02850.34~993	1409	1323	2732	1289	883	2172	704	1273	1981	943	891	1834
ILL.adcB-BSU02870.1~843	636	511	1147	1649	1567	3216	234	1183	1414	1109	1196	2305
ILL.adcC-BSU02860.56~751	779	640	1419	1704	1499	3203	240	1353	1593	1432	1759	3191
ILL.addA-BSU10630.1~3699	2935	2678	5613	3712	3612	7324	2239	2211	4447	849	1104	1953
ILL.addB-BSU10620.11~3511	1670	1623	3293	1878	1918	3796	1903	1480	3372	1477	1280	2756
ILL.adeC-BSU14520.13~1746	8387	8393	16780	18595	16054	34649	1838	5999	7837	4467	23827	28299
ILL.adhA-BSU27010.59~1108	219	166	385	444	351	795	143	215	358	182	146	328
ILL.adhB-BSU26970.1~1137	5	11	16	13	8	21	7	6	13	12	18	30
ILL.adk-BSU01370.55~708	69380	60092	129469	49918	82922	132840	43284	47963	91180	1827	10660	12487
ILL.ahpC-BSU40090.345~908	22517	19174	41691	16869	15623	32492	18881	26536	45436	30518	30892	61417
ILL.ahpF-BSU40100.14~1543	46791	46426	93215	46452	35666	82118	58355	58131	116387	63291	53658	116945
ILL.ahrC-BSU24250.98~547	907	966	1873	3597	4689	8286	940	1750	2685	720	1859	2582
ILL.alaS-BSU27410.80~2716	10823	9065	19887	12997	17718	30715	11505	20171	31678	3752	17102	20855
ILL.alaT-BSU31400.1~1161	5118	5059	10177	9414	9641	19055	3047	3323	6356	820	1273	2094
ILL.albA-BSU37370.1~1347	795	614	1409	704	839	1543	652	647	1298	353	400	753
ILL.albB-BSU37380.1~162	33	25	57	30	38	68	19	36	55	14	23	37
ILL.albC-BSU37390.1~720	297	239	519	301	321	622	212	252	452	105	156	249
ILL.albD-BSU37400.1~1311	366	272	638	378	417	795	232	317	550	90	193	283
ILL.albE-BSU37410.1~1161	157	135	292	168	150	318	97	131	233	46	77	124
ILL.albF-BSU37420.5~1285	112	78	190	88	73	161	34	73	107	24	68	92
ILL.albG-BSU37430.1~702	39	26	65	47	62	109	12	22	34	8	15	23
ILL.ald-BSU31930.15~1151	15913	17150	33059	104969	100820	205789	25651	17176	42781	42338	2854	45166
ILL.aldX-BSU39860.1~1338	277	208	485	251	260	511	215	291	506	97	142	239
ILL.aldY-BSU38830.1~1458	31	57	88	22	31	53	38	52	90	115	69	184
ILL.alkA-BSU01800.26~937	390	362	752	441	562	1003	287	417	703	144	196	340
ILL.alrA-BSU04640.20~1189	2872	2367	5231	2203	2031	4234	1287	2075	3352	819	1910	2728
ILL.alrB-BSU17640.457~1641	15	24	39	21	30	51	9	34	43	12	27	39
ILL.alsD-BSU36000.62~829	741	615	1352	853	893	1746	480	613	1093	574	1100	1672
ILL.alsR-BSU36020.21~929	322	251	573	448	376	824	238	294	532	306	270	577
ILL.alsS-BSU36010.2~1714	544	493	1037	602	630	1232	552	683	1232	294	448	742
ILL.alsT-BSU18120.45~1442	8696	8399	17095	2720	3343	6063	4826	13774	18601	5298	8733	14031
ILL.amhX-BSU03010.50~1201	67	72	139	1425	1073	2498	37	44	81	57	132	189
ILL.ampS-BSU14450.14~1246	2237	2026	4261	2130	1459	3589	1445	2162	3607	1794	1637	3431
ILL.amtB-BSU36510.23~1237	89	73	162	82	117	199	39	68	107	83	55	137
ILL.amyC-BSU30290.1~831	32	19	51	54	43	97	28	47	75	613	98	711
ILL.amyD-BSU30280.1~912	34	16	50	42	38	80	35	31	66	641	92	733
ILL.amyE-BSU03040.1~1980	971	921	1892	2573	2357	4930	843	1905	2747	2171	1585	3754
ILL.amyX-BSU29930.6~2162	1800	1727	3527	4030	4383	8413	1033	1404	2438	477	826	1303
ILL.ansA-BSU23580.146~1135	15018	11652	26669	850	820	1670	720	2930	3652	589	2097	2688
ILL.ansR-BSU23590.29~379	840	863	1703	130	127	257	157	402	559	155	405	560
ILL.ansZ-BSU02690.15~1142	97	63	160	95	76	171	32	56	88	54	64	118
ILL.antE-BSU25220.1~297	9	12	21	21	16	37	21	13	34	13	9	23
ILL.appB-BSU11390.87~1037	88	83	171	4743	2416	7159	24	59	83	63	62	125
ILL.appC-BSU11400.1~912	63	85	148	4208	2287	6495	36	58	94	39	53	92
ILL.appD-BSU11360.1~987	28	33	61	2174	1230	3404	13	7	19	23	17	40
ILL.appF-BSU11370.1~990	249	260	509	16850	8807	25657	90	79	169	152	70	222
ILL.aprE-BSU10300.27~1172	85	71	156	532	249	781	47	28	75	83	43	126
ILL.aprX-BSU17260.30~1358	21	24	45	48	44	92	16	26	42	104	103	208
ILL.apt-BSU27610.6~518	4256	4396	8649	1918	1926	3844	4087	5334	9517	1039	3287	4335
ILL.araA-BSU28800.1~1491	183	120	303	103	95	198	385	238	623	291	147	438
ILL.araB-BSU28790.1~1683	139	96	235	57	75	132	318	201	519	169	90	259
ILL.araD-BSU28780.1~690	56	19	75	29	29	58	100	82	178	55	30	87
ILL.araE-BSU33960.1~1395	118	92	210	45	40	85	154	99	253	427	85	512
ILL.araL-BSU28770.1~819	53	33	85	31	42	73	81	79	162	54	28	82
ILL.araM-BSU28760.1~1185	62	36	98	38	47	85	76	99	177	72	43	115
ILL.araN-BSU28750.1~1302	69	40	109	56	67	123	57	97	153	81	40	121
ILL.araP-BSU28740.1~942	21	17	38	36	32	68	21	39	60	27	17	44
ILL.araQ-BSU28730.1~846	16	10	26	16	12	28	22	26	48	18	17	35
ILL.araR-BSU33970.1~1155	1249	1052	2301	1006	1000	2006	1519	1895	3414	1496	1606	3101
ILL.arfM-BSU37290.1~477	7	3	10	2	0	2	0	2	2	5	1	6
ILL.argB-BSU11210.15~791	5	7	12	33	57	90	10	7	18	0	3	4
ILL.argC-BSU11190.19~1056	33	41	74	105	104	209	21	71	92	34	84	119
ILL.argD-BSU11220.1~1158	10	12	22	50	42	92	10	5	15	5	6	11
ILL.argF-BSU11250.1~960	66	68	134	54	70	124	48	51	99	35	74	109
ILL.argG-BSU29450.14~1225	321	264	584	799	805	1604	247	598	859	163	1753	1964
ILL.argH-BSU29440.1~1386	348	383	731	940	1167	2107	377	687	1062	168	1735	1904
ILL.argI-BSU40320.54~944	1459.9	1691.31	3151.68	1930.44	1905.46	3836.4	670.43	1389.61	2062.19	794.149	2708.89	3502.73
ILL.argJ-BSU11200.20~1240	40	27	67	141	130	271	11	19	31	8	38	46
ILL.argS-BSU37330.1~1671	10309	10665	20964	8380	8383	16763	9787	13068	22847	3919	4841	8774
ILL.aroA-BSU29750.140~1216	13226	13873	27099	40283	32102	72385	6547	9845	16392	16291	13895	30184
ILL.aroB-BSU22700.1~1089	2457	2786	5243	17294	16790	34084	2874	3479	6340	7682	7478	15158
ILL.aroD-BSU23080.86~853	1084	1149	2233	2069	2194	4263	1205	2578	3784	1263	2728	3992
ILL.aroE-BSU22600.1~1287	5081	5259	10340	6076	4608	10684	3772	4733	8483	1320	2245	3566
ILL.aroE-BSU25660.18~860	4194	3916	8110	4874	6512	11386	2060	5418	7481	854	2972	3826
ILL.aroF-BSU22710.3~1175	2692	2860	5552	16524	16012	32536	3348	4111	7459	10410	10992	21399
ILL.aroH-BSU22690.1~384	1232	1258	2489	6679	7826	14505	903	1423	2327	2170	2533	4701
ILL.aroK-BSU03150.117~677	867	657	1520	791	561	1352	623	778	1398	731	864	1593
ILL.arsB-BSU25790.23~1063	247	266	513	229	288	517	122	300	422	146	184	330
ILL.arsC-BSU25780.12~431	193	151	344	149	198	347	102	179	285	80	113	192
ILL.arsR-BSU25810.11~328	119	94	213	59	66	125	53	103	156	82	80	162
ILL.artP-BSU23980.38~805	727	688	1415	115	119	234	348	701	1049	52	483	535
ILL.artQ-BSU23970.70~729	235	225	460	120	131	251	200	358	558	57	227	284
ILL.artR-BSU23960.1~723	488	410	898	217	288	505	330	595	925	107	421	528
ILL.asd-BSU16750.57~1097	10777	10455	21199	22928	23790	46718	7587	8931	16529	7721	17297	25102
ILL.aseR-BSU05330.44~379	88	69	157	55	59	114	67	110	176	30	41	71
ILL.aslA-BSU39900.1~270	1	5	6	14	9	23	2	0	2	2	0	2
ILL.asnB-BSU30540.150~2048	25809	23196	49001	13297	15639	28936	15466	35801	51330	5988	23732	29725
ILL.asnC-BSU22360.1~1293	25371	22392	47718	32413	29424	61837	24305	31720	55786	9635	19230	28809
ILL.asnH-BSU39920.1~2244	223	151	374	164	143	307	147	234	381	135	138	273
ILL.asnO-BSU10790.1~1845	35	68	103	28	42	70	84	340	424	28	457	486
ILL.aspA-BSU23570.45~1472	22442	19053	41473	1434	1388	2822	1371	5674	7044	886	3061	3943
ILL.aspB-BSU22370.23~1204	18921	16532	35432	23341	19331	42672	14540	19042	33727	7028	12153	19252
ILL.aspS-BSU27550.1~1779	6043	5893	11921	2243	2961	5204	5051	5359	10411	845	6130	7003
ILL.atpA-BSU36830.17~1525	50560	51211	101745	61232	57300	118532	44841	49568	94423	12679	29671	42352
ILL.atpB-BSU36870.1~735	28134	28685	56804	21135	18848	39983	21173	30299	51502	7923	17756	25680
ILL.atpC-BSU36800.24~422	11895	14428	26257	15397	15451	30848	15645	14322	29726	2608	4654	7325
ILL.atpD-BSU36810.26~1447	48062	52935	100911	58973	57310	116283	49558	49027	98361	8011	17705	25749
ILL.atpE-BSU36860.46~258	9941	10643	20576	7965	6775	14740	8108	9632	18679	2926	5975	9246
ILL.atpF-BSU36850.4~516	18275	16797	35072	17277	17488	34765	10517	17090	27616	3559	10746	14311
ILL.atpG-BSU36820.1~864	26910	25536	52428	28211	30403	58614	20617	23762	43675	3518	11003	14520
ILL.atpH-BSU36840.1~546	17381	16270	33651	16653	18519	35172	10101	16139	25893	3180	10693	13876
ILL.atpI-BSU36880.271~654	6629	7787	14415	5640	5922	11562	4727	10322	15049	2378	5882	8266
ILL.azlB-BSU26720.1~474	184	116	300	328	337	665	90	120	210	77	131	210
ILL.azlC-BSU26710.1~765	234	194	428	547	586	1133	116	175	291	95	198	293
ILL.azlD-BSU26700.1~333	101	81	182	245	225	470	70	92	160	51	88	139
ILL.bacA-BSU37740.5~619	27	29	56	365	163	528	18	3	21	57	25	82
ILL.bacB-BSU37730.1~708	63	54	117	642	312	954	45	37	82	55	27	82
ILL.bacC-BSU37720.1~768	78	93	171	767	432	1199	42	29	69	52	30	80
ILL.bacD-BSU37710.1~1419	259	223	482	1660	1101	2761	124	123	247	93	68	161
ILL.bacE-BSU37700.1~1185	206	222	428	1091	607	1698	96	106	201	33	34	66
ILL.bcd-BSU24080.12~1106	2147	1756	3903	1679	1555	3234	4607	2261	6868	2246	1903	4149
ILL.bceA-BSU30380.102~863	100	73	173	172	179	351	36	118	154	58	149	207
ILL.bceB-BSU30370.1~1941	197	196	393	407	558	965	100	254	353	113	277	390
ILL.bceR-BSU30400.61~756	316	253	569	750	782	1532	210	267	477	151	147	298
ILL.bceS-BSU30390.1~1005	557	498	1055	1190	1436	2626	311	440	750	239	244	482
ILL.bcrC-BSU36530.9~590	1500	1164	2664	1035	1131	2166	264	1025	1290	70	711	781
ILL.bcsA-BSU22050.74~1171	14	9	23	17	23	40	51	138	189	15	118	134
ILL.bdbA-BSU21460.1~414	143	191	334	95	172	267	4	9	13	8	8	16
ILL.bdbB-BSU21440.1~447	179	271	450	170	246	416	5	44	49	32	56	88
ILL.bdbC-BSU33470.5~421	3051	2826	5875	2646	2124	4770	2074	2991	5102	2006	1518	3533
ILL.bdbD-BSU33480.1~669	5394	4507	9896	3991	3404	7395	2828	4818	7621	3052	2665	5712
ILL.bdhA-BSU06240.263~1303	20258	18554	38812	20591	23397	43988	16895	16380	33274	15955	6232	22185
ILL.besA-BSU32010.59~928	1745	1380	3125	800	382	1182	1716	1290	2999	474	584	1058
ILL.bglA-BSU40110.14~1453	1304	784	2088	609	711	1320	1699	1767	3468	1972	1218	3190
ILL.bglC-BSU03410.1~1434	148	134	281	508	508	1016	122	196	328	441	344	792
ILL.bglH-BSU39260.23~1432	6220	3240	9458	1692	2157	3849	4782	7120	11901	19153	12749	31890
ILL.bglP-BSU39270.2~1831	6512	3438	9949	2491	2737	5228	5504	9248	14758	43597	31222	74821
ILL.bglS-BSU39070.93~821	330	200	528	266	297	563	350	408	761	1507	626	2131
ILL.bhlA-BSU21420.1~213	0	2	2	0	0	0	0	1	1	0	2	2
ILL.bhlB-BSU21430.1~267	3	2	5	2	0	2	0	5	5	1	2	3
ILL.bioA-BSU30230.1~1347	33	27	60	52	56	108	16	25	41	29	45	74
ILL.bioB-BSU30200.1~1008	23	21	44	31	25	56	8	15	23	11	12	23
ILL.bioD-BSU30210.1~696	17	14	31	19	16	35	7	9	16	6	4	10
ILL.bioF-BSU30220.1~1170	22	22	44	41	37	78	14	27	41	18	34	52
ILL.bioI-BSU30190.69~1256	32	26	58	60	33	93	18	33	51	10	32	42
ILL.bioW-BSU30240.21~797	27	13	40	28	32	60	8	15	23	24	25	49
ILL.bioY-BSU10370.12~572	13	7	20	25	21	46	4	7	11	17	22	39
ILL.bioYB-BSU32030.6~608	217	180	397	289	228	517	156	190	343	524	329	853
ILL.bipA-BSU14770.10~1848	29499	31056	60554	21310	27507	48817	11475	37536	49026	6079	19244	25328
ILL.birA-BSU22440.1~978	2059	1545	3604	1923	1687	3610	1529	2148	3678	420	1234	1655
ILL.bkdAA-BSU24050.22~1014	2384	1925	4309	1476	1380	2856	2948	2527	5477	694	741	1435
ILL.bkdAB-BSU24040.14~997	2600	2241	4841	1710	1659	3369	3081	2895	5999	723	788	1520
ILL.bkdB-BSU24030.1~1275	3906	3417	7294	2697	2311	5008	4459	4684	9110	1219	990	2202
ILL.bkdR-BSU24100.50~2128	2140	1822	3961	1413	1482	2895	5848	2756	8604	4202	3461	7660
ILL.blt-BSU26590.10~1212	59	31	90	62	63	125	31	79	110	27	58	85
ILL.bltD-BSU26600.1~459	30	27	57	24	30	54	18	43	61	13	21	34
ILL.bltR-BSU26580.4~825	113	89	202	75	87	162	27	110	136	52	260	311
ILL.blyA-BSU21410.1~1104	1	0	1	1	1	2	0	1	1	1	3	4
ILL.bmr-BSU24010.1~1170	500	460	960	1459	1734	3193	412	639	1050	557	461	1016
ILL.bmrA-BSU34820.53~1822	2772	2174	4946	2081	2187	4268	2138	2628	4767	1104	2482	3586
ILL.bmrR-BSU24020.4~840	180	125	305	485	480	965	103	161	262	282	192	472
ILL.bmrU-BSU24000.12~905	2	1	3	18	11	29	7	3	9	40	31	72
ILL.bofA-BSU00230.66~329	82	93	175	214	214	428	71	276	362	264	753	1042
ILL.bofC-BSU27750.48~560	123	98	221	169	148	317	157	316	474	134	145	279
ILL.bpr-BSU15300.63~4364	205	185	390	448	530	978	168	271	439	676	2484	3160
ILL.braB-BSU29600.88~1425	2469	2244	4713	1396	1699	3095	544	1941	2485	713	1860	2573
ILL.brnQ-BSU26690.165~1487	543	463	1006	1176	1271	2447	236	499	735	138	450	588
ILL.bsaA-BSU21900.124~606	136	105	241	201	121	322	91	115	206	67	188	255
ILL.bscR-BSU27170.172~756	229	151	380	157	176	333	194	154	348	68	147	215
ILL.bsdD-BSU03651.1~228	20	15	35	17	16	33	8	20	28	4	13	17
ILL.bsn-BSU32540.14~880	204	173	377	316	262	578	297	302	598	257	102	359
ILL.BSU-misc-RNA-1-extra.1~213	3051	1889	4940	4481	2323	6804	5699	1879	7312	1683	1753	3439
ILL.BSU-misc-RNA-10-extra.1~103	18	6	21	1	2	3	97	3	21	3	1	3
ILL.BSU-misc-RNA-11-extra.1~108	7	5	12	53	10	63	14	2	16	17	10	26
ILL.BSU-misc-RNA-12-extra.1~118	66	32	95	252	111	363	173	4	82	146	6	111
ILL.BSU-misc-RNA-13-extra.1~215	2232	1380	3606	2889	1959	4848	734	1585	2319	1524	1941	3492
ILL.BSU-misc-RNA-14-extra.1~109	26	18	43	33	9	42	29	6	30	22	18	41
ILL.BSU-misc-RNA-15-extra.1~121	7	1	8	49	13	62	5	0	4	24	0	23
ILL.BSU-misc-RNA-16-extra.1~112	134	23	156	119	43	162	250	178	425	37	291	328
ILL.BSU-misc-RNA-17-extra.1~211	2462	1360	3822	8440	3794	12234	5530	1848	7410	5992	3534	9534
ILL.BSU-misc-RNA-18-extra.1~156	241	211	444	7343	2709	10052	552	88	578	1648	261	1794
ILL.BSU-misc-RNA-19-extra.1~113	81	28	62	95	14	109	531	26	192	174	12	79
ILL.BSU-misc-RNA-20-extra.1~157	303	155	456	3825	2074	5899	190	55	244	1413	479	1885
ILL.BSU-misc-RNA-21-extra.1~101	0	0	0	12	8	20	8	0	1	1	0	1
ILL.BSU-misc-RNA-22-extra.1~45	0	0	0	1	0	1	0	0	1	0	2	2
ILL.BSU-misc-RNA-23-extra.1~121	1	1	2	2	5	7	0	2	4	6	2	12
ILL.BSU-misc-RNA-24-extra.1~102	2	4	6	2	0	2	22	3	12	2	1	2
ILL.BSU-misc-RNA-25-extra.1~227	3482	3188	6658	6377	4958	11335	2480	4061	6704	2999	3176	6284
ILL.BSU-misc-RNA-26-extra.1~117	153	136	244	65	29	94	383	60	279	152	110	219
ILL.BSU-misc-RNA-27-extra.1~118	86	83	164	24	11	35	82	22	86	23	29	84
ILL.BSU-misc-RNA-28-extra.1~115	197	95	275	10	33	43	144	17	221	9	48	87
ILL.BSU-misc-RNA-29-extra.1~106	7	5	12	11	7	18	17	0	18	5	4	11
ILL.BSU-misc-RNA-3-extra.1~141	4337	4410	8738	2118	2280	4398	3190	3833	7186	760	1542	2310
ILL.BSU-misc-RNA-30-extra.1~42	0	1	1	1	0	1	4	2	4	9	7	17
ILL.BSU-misc-RNA-31-extra.1~92	0	0	0	0	0	0	0	0	0	0	1	2
ILL.BSU-misc-RNA-32-extra.1~187	34360	12313	46668	45646	9946	55592	239411	25725	267496	94398	22137	117376
ILL.BSU-misc-RNA-34-extra.1~101	1	2	3	0	0	0	1	1	1	0	1	1
ILL.BSU-misc-RNA-36-extra.1~145	1105	403	1489	715	378	1093	2160	506	2627	672	326	1002
ILL.BSU-misc-RNA-37-extra.1~98	13	6	19	9	4	13	29	4	30	13	2	14
ILL.BSU-misc-RNA-38-extra.1~102	7	8	15	11	8	19	8	5	11	12	2	14
ILL.BSU-misc-RNA-39-extra.1~175	3197	1698	4895	4420	3536	7956	1345	2283	3631	2133	3646	5783
ILL.BSU-misc-RNA-4-extra.1~57	1	0	1	1	0	1	2	2	3	0	0	0
ILL.BSU-misc-RNA-40-extra.1~208	1663	890	2545	1501	682	2183	3412	1439	4615	1140	872	1977
ILL.BSU-misc-RNA-41-extra.1~193	14397	2814	17210	33379	10122	43501	30794	5609	36390	17703	6271	23969
ILL.BSU-misc-RNA-42-extra.1~233	4229	3218	7447	6105	4832	10937	3469	4694	8168	3025	5380	8408
ILL.BSU-misc-RNA-43-extra.1~76	20	24	43	9	7	16	11	16	30	14	16	31
ILL.BSU-misc-RNA-44-extra.1~223	3979	1950	5929	4732	2211	6943	4583	2712	7358	4047	2921	6971
ILL.BSU-misc-RNA-45-extra.1~247	114	122	236	5557	2569	8126	50	27	78	79	99	179
ILL.BSU-misc-RNA-46-extra.1~180	2047	980	3027	2583	1579	4162	2835	1569	4407	1029	1081	2115
ILL.BSU-misc-RNA-47-extra.1~131	498	299	762	299	191	490	1096	306	916	753	419	1031
ILL.BSU-misc-RNA-48-extra.1~248	1858	1244	2969	1288	914	2202	1375	1765	3039	633	1669	2285
ILL.BSU-misc-RNA-49-extra.1~215	4624	2358	6974	4637	2054	6691	7033	3313	10315	5980	3189	9158
ILL.BSU-misc-RNA-5-extra.1~171	892	584	1448	793	613	1406	1105	738	1715	8421	563	7902
ILL.BSU-misc-RNA-50-extra.1~139	2405	1714	4113	810	583	1393	3500	2451	5637	850	1033	1885
ILL.BSU-misc-RNA-51-extra.1~102	0	4	4	6	2	8	19	0	1	4	3	6
ILL.BSU-misc-RNA-52-extra.1~149	503	266	764	130	101	231	242	158	386	95	159	254
ILL.BSU-misc-RNA-53-extra.1~107	22	8	26	7	7	14	85	11	68	68	15	73
ILL.BSU-misc-RNA-54-extra.1~180	714	358	1071	684	475	1159	423	636	1058	502	1257	1757
ILL.BSU-misc-RNA-56-extra.1~236	402	410	812	1538	1140	2678	61	220	281	327	316	644
ILL.BSU-misc-RNA-57-extra.1~222	70.9859	85.5237	152.868	0.00821646	21.5707	18.5214	51.6415	119.32	166.471	0.00889269	130.74	128.3
ILL.BSU-misc-RNA-58-extra.1~222	472.014	347.476	823.132	115.992	127.429	246.479	178.359	588.68	769.529	74.9911	421.26	497.7
ILL.BSU-misc-RNA-59-extra.1~207	62	67	129	83	95	178	49	90	140	42	58	100
ILL.BSU-misc-RNA-6-extra.1~248	653	609	1262	678	580	1258	349	691	1047	405	672	1098
ILL.BSU-misc-RNA-60-extra.1~103	261	76	337	503	94	597	381	129	509	75	86	161
ILL.BSU-misc-RNA-61-extra.1~107	1	1	2	20	7	27	3	0	1	4	1	4
ILL.BSU-misc-RNA-62-extra.1~107	0	2	2	10	3	13	1	0	1	0	0	0
ILL.BSU-misc-RNA-63-extra.1~103	11	6	17	0	1	1	3	5	7	2	6	8
ILL.BSU-misc-RNA-7-extra.1~144	2815	1121	3935	806	522	1328	797	615	1443	523	503	1027
ILL.BSU-misc-RNA-8-extra.1~101	116	51	152	17	11	28	193	44	188	20	31	53
ILL.BSU-misc-RNA-9-extra.1~103	10	10	20	7	5	12	15	11	23	0	0	0
ILL.buk-BSU24070.4~1095	1849	1443	3288	1170	1073	2243	2960	1857	4811	1335	1193	2528
ILL.cah-BSU03180.1~957	722	510	1225	923	742	1665	324	366	701	190	266	456
ILL.carA-BSU11230.1~1062	8	6	14	10	12	22	3	3	6	1	3	4
ILL.carB-BSU11240.1~3093	51	52	103	81	70	151	42	44	85	21	19	40
ILL.carB-BSU15520.1~3216	10155	8462	18617	3994	5423	9417	34252	5418	39666	288	1575	1863
ILL.catD-BSU08230.21~425	182	152	333	150	142	292	93	251	349	164	447	624
ILL.catE-BSU08240.1~858	409	465	874	433	421	854	422	835	1255	540	1294	1834
ILL.cbiO-BSU01450.128~973	2109	2258	4367	5923	9354	15277	2745	7216	9953	661	1976	2635
ILL.cbiO-BSU01460.15~845	1978	1877	3855	5051	8892	13943	2425	7139	9536	442	1795	2237
ILL.cca-BSU22450.5~1198	2153	1761	3914	2161	1561	3722	1741	2191	3934	562	1433	1996
ILL.cccA-BSU25190.32~394	212	190	402	405	395	800	1197	644	1844	932	664	1597
ILL.cccB-BSU35270.8~346	1853	1712	3562	1667	1745	3412	1996	2328	4493	1455	1707	3165
ILL.ccdA-BSU17930.86~793	241	258	499	901	1249	2150	1434	4574	6008	888	3321	4210
ILL.ccpA-BSU29740.151~1155	7522	7759	15281	6174	7297	13471	6490	10580	17079	3848	10082	13930
ILL.ccpB-BSU40870.44~979	85	89	173	175	210	385	126	629	754	262	2593	2854
ILL.ccpC-BSU14140.25~906	2213	1892	4105	2556	2001	4557	3610	5618	9284	3241	5097	8337
ILL.ccpN-BSU25250.133~771	2221	1844	4064	2632	2592	5224	1160	2423	3599	1936	9432	11402
ILL.cdd-BSU25300.1~411	1410	1501	2911	3950	4190	8140	1655	2132	3788	2339	2469	4808
ILL.cdoA-BSU31140.338~823	25	16	41	16	8	24	2	4	6	10	36	46
ILL.cdsA-BSU16540.1~810	2586	2435	5020	6686	6964	13650	3446	7045	10666	2082	7769	9923
ILL.cgeA-BSU19780.15~416	2	1	3	4	4	8	1	5	6	0	12	12
ILL.cgeB-BSU19790.7~960	13	23	36	55	50	105	10	10	20	13	34	47
ILL.cgeC-BSU19770.1~306	0	1	1	1	4	5	0	0	0	1	12	13
ILL.cgeD-BSU19760.1~1281	68	98	166	1135	1623	2758	13	31	44	3	25	28
ILL.cgeE-BSU19750.4~783	113	137	248	1265	1819	3084	33	37	70	19	25	44
ILL.cggR-BSU33950.100~1122	9818	10678	20496	6455	4356	10811	4596	15697	20371	544	2159	2704
ILL.cheA-BSU16430.1~2019	4908	3961	8867	26322	26169	52491	1289	1795	3087	88	169	257
ILL.cheB-BSU16420.2~1075	2545	1925	4470	12047	11978	24025	572	854	1424	53	80	133
ILL.cheC-BSU16450.10~639	1460	1191	2651	8104	8715	16819	451	536	1002	54	61	115
ILL.cheD-BSU16460.1~501	1193	1031	2224	6632	7434	14066	413	477	893	45	59	104
ILL.cheR-BSU22720.25~795	527	457	984	3240	3123	6363	575	953	1545	2736	3984	6721
ILL.cheV-BSU14010.162~1073	1671	2171	3842	10640	11968	22608	493	800	1293	56	91	147
ILL.cheW-BSU16440.22~492	1282	1193	2468	7387	8604	15991	404	505	921	56	75	131
ILL.cheY-BSU16330.26~388	1662	1343	2873	5264	6183	11447	498	699	1208	73	125	199
ILL.cimH-BSU38770.19~1371	53	78	131	894	757	1651	147	25	170	663	102	763
ILL.cinA-BSU16930.1~1251	4927	4309	9233	14071	15582	29653	3956	6239	10286	4466	7368	11878
ILL.citA-BSU09440.12~1112	472	430	901	526	465	991	407	587	987	439	898	1332
ILL.citB-BSU18000.43~2772	15162	17209	32371	78640	108925	187565	18081	9056	27128	11044	6884	17928
ILL.citH-BSU39060.1~1281	37	36	73	30	36	66	20	28	48	36	76	112
ILL.citM-BSU07610.40~1341	198	196	394	192	261	453	381	346	727	304	227	531
ILL.citR-BSU09430.36~911	322	237	559	371	262	633	248	275	528	453	429	877
ILL.citS-BSU07580.4~1632	307	304	611	1424	1520	2944	364	288	650	360	444	804
ILL.citT-BSU07590.1~681	138	133	271	530	539	1069	114	95	210	129	131	261
ILL.citZ-BSU29140.186~1304	11463	10290	21753	20372	23619	43991	11338	6620	17928	8777	6541	15311
ILL.clpC-BSU00860.1~2433	8188	5961	14143	7847	7944	15791	6706	17863	24514	8785	37783	46564
ILL.clpE-BSU13700.33~2132	749	638	1387	1950	2491	4441	375	395	772	225	203	428
ILL.clpP-BSU34540.42~635	9980	8988	18962	7667	7085	14752	6442	7983	14420	2429	2064	4491
ILL.clpQ-BSU16150.1~546	3120	3000	6120	4385	4991	9376	2204	4192	6407	844	2952	3797
ILL.clpX-BSU28220.1~1263	21983	22080	44063	30147	24984	55131	20853	37501	58351	17265	25917	43182
ILL.clsA-BSU36590.243~1691	1919	1781	3700	1839	2245	4084	2137	3322	5459	770	1639	2409
ILL.clsB-BSU37190.1~1197	15	6	21	13	13	26	3	7	10	7	10	17
ILL.cmk-BSU22890.1~675	4569	4521	9090	3880	4177	8057	2658	4866	7566	863	2329	3201
ILL.coaA-BSU23760.1~960	855	717	1572	1250	1159	2409	705	887	1592	319	377	696
ILL.coaBC-BSU15700.78~1298	1184	995	2179	6549	6641	13190	1565	2850	4419	3136	5112	8257
ILL.coaD-BSU15020.5~490	1631	1441	3064	1863	2048	3911	898	1929	2823	1033	2410	3445
ILL.coaE-BSU29060.16~609	1032	871	1878	1230	1195	2425	772	1154	1909	386	514	900
ILL.coaX-BSU00700.195~971	3032	2314	5346	2196	2738	4934	2177	4069	6248	942	9812	10777
ILL.codY-BSU16170.1~780	5874	5796	11652	8715	9534	18249	4731	8056	12873	1407	4262	5684
ILL.coiA-BSU11530.57~1178	25	26	51	34	28	62	43	78	121	31	262	293
ILL.comA-BSU31680.3~647	2003	1689	3688	2070	1624	3694	1611	2693	4256	3344	4971	8277
ILL.comC-BSU28070.21~767	22	18	40	15	26	41	17	78	95	5	58	63
ILL.comEA-BSU25590.1~618	4	6	10	7	27	34	11	78	90	9	186	196
ILL.comEB-BSU25580.10~579	435	442	875	526	506	1032	399	450	847	180	546	728
ILL.comEC-BSU25570.4~2334	171	147	317	380	333	713	94	289	379	131	484	619
ILL.comER-BSU25600.84~905	15	7	22	13	14	27	4	5	9	13	13	26
ILL.comFA-BSU35470.7~1398	107	114	221	324	270	594	78	314	393	268	659	929
ILL.comFB-BSU35460.60~356	95	110	205	203	156	359	72	126	197	92	88	179
ILL.comFC-BSU35450.1~690	378	298	673	592	580	1172	183	429	612	299	359	661
ILL.comGA-BSU24730.2~1072	10	13	23	20	17	37	14	8	22	5	26	31
ILL.comGB-BSU24720.1~972	10	5	15	8	9	17	3	4	7	1	17	18
ILL.comGC-BSU24710.1~297	4	4	8	5	1	6	1	6	7	2	7	9
ILL.comGD-BSU24700.1~432	2	2	4	6	8	14	2	3	5	0	8	8
ILL.comGE-BSU24690.1~348	5	2	7	4	4	8	1	2	4	1	8	9
ILL.comGF-BSU24680.26~409	5	6	11	9	6	15	2	12	14	2	11	13
ILL.comGG-BSU24670.1~375	17	22	39	10	18	28	4	15	20	4	16	20
ILL.comK-BSU10420.20~598	259	236	495	507	521	1028	43	104	147	28	31	59
ILL.comN-BSU27660.1~297	1216	1161	2376	1124	1124	2248	1107	1478	2589	667	996	1662
ILL.comP-BSU31690.1~2310	6137	5119	11256	5323	6034	11357	2254	5102	7357	3987	6781	10767
ILL.comQ-BSU31710.106~1005	1176	740	1916	864	923	1787	417	757	1175	1441	1616	3057
ILL.comS-BSU03500.1~141	1.54e-08	1.1e-08	0	0	0	0	0	4.52e-05	1.30421e-08	0	0.000351214	0
ILL.comX-BSU31700.1~168	244	184	426	134	211	345	49	111	212	314	285	632
ILL.comZ-BSU11310.15~206	727	653	1378	516	450	966	652	904	1549	846	1056	1899
ILL.copA-BSU33500.84~2492	1413	1431	2844	1516	1851	3367	1355	1828	3185	1253	1255	2508
ILL.copB-BSU33490.70~2169	1439	1132	2570	1668	2094	3762	2194	1773	3971	998	667	1670
ILL.copZ-BSU33510.13~222	183	163	346	153	144	297	439	204	524	238	112	346
ILL.cotA-BSU06300.152~1693	23	15	38	91	70	161	4	22	26	26	97	123
ILL.cotB-BSU36050.1~1143	61	53	114	23	11	34	14	32	46	17	66	83
ILL.cotC-BSU17700.175~375	58	52	109	206	355	561	38	242	292	233	309	556
ILL.cotD-BSU22200.11~238	2245	1755	3976	1498	1687	3185	1155	1784	3027	623	1520	2176
ILL.cotE-BSU17030.26~571	40	30	70	39	59	98	19	33	52	18	120	138
ILL.cotF-BSU40530.26~508	11	8	19	6	8	14	7	11	18	1	13	14
ILL.cotG-BSU36070.141~728	0	0	0	0	0	0	0	2	2	3	7	10
ILL.cotH-BSU36060.1~1089	19	10	29	12	12	24	12	10	22	8	15	23
ILL.cotI-BSU30920.1~1074	9	6	15	1	5	6	4	3	7	4	6	8
ILL.cotJA-BSU06890.1~249	2	1	3	2	0	2	3	4	7	0	1	1
ILL.cotJB-BSU06900.1~264	2	1	3	1	2	3	1	3	4	1	1	2
ILL.cotJC-BSU06910.1~570	5	11	16	3	5	8	10	13	23	1	13	14
ILL.cotM-BSU17970.42~434	8	7	15	11	6	17	2	16	18	12	18	30
ILL.cotO-BSU11730.18~701	65	85	149	50	151	201	350	1498	1871	804	4302	5130
ILL.cotP-BSU05550.1~432	2	2	4	0	1	1	2	3	5	0	16	16
ILL.cotR-BSU34530.305~1267	52	48	100	26	24	50	7	36	43	13	54	67
ILL.cotS-BSU30900.1~1056	30	17	47	30	30	60	23	66	89	36	1250	1290
ILL.cotSA-BSU30910.1~1134	24	14	38	22	20	42	13	86	99	30	1348	1380
ILL.cotT-BSU12090.28~351	4	0	4	2	0	2	2	5	7	2	5	7
ILL.cotU-BSU17670.192~452	16	21	37	2	16	18	2	16	18	12	24	36
ILL.cotV-BSU11780.1~387	3	1	4	4	4	8	5	4	7	4	17	22
ILL.cotW-BSU11770.1~318	2	4	6	6	4	10	0	2	2	4	14	18
ILL.cotX-BSU11760.99~617	7	7	14	5	11	16	2	10	12	10	36	46
ILL.cotY-BSU11750.1~489	0	2	2	5	0	5	3	2	5	4	10	14
ILL.cotZ-BSU11740.1~447	2	1	3	7	2	9	0	3	3	5	13	18
ILL.coxA-BSU27830.148~744	16	21	37	60	83	143	28	46	74	21	122	143
ILL.crcBA-BSU09600.1~357	309	279	588	438	444	882	182	296	475	137	254	392
ILL.crh-BSU34740.24~281	1151	1128	2264	3138	6344	9482	749	1427	2249	1604	9406	11118
ILL.csaA-BSU19040.1~333	95	98	193	342	235	577	96	80	176	93	54	147
ILL.csbA-BSU35180.68~298	392	286	678	245	300	545	266	400	667	189	179	368
ILL.csbB-BSU08600.1~990	1655	1475	3127	1180	1381	2561	849	998	1845	201	889	1090
ILL.csbC-BSU39810.18~1403	23	38	61	89	63	152	112	179	291	266	325	591
ILL.csbD-BSU36670.14~202	2	2	4	7	7	14	9	7	16	103	44	150
ILL.csbX-BSU27760.6~1313	625	441	1066	601	634	1235	1186	1291	2476	978	610	1588
ILL.csfB-BSU00240.130~324	188	293	478	169	343	512	63	1980	2165	277	2244	2606
ILL.csgA-BSU02070.112~360	4	0	4	13	15	28	6	13	19	12	21	33
ILL.cshA-BSU04580.1~1536	21797	22851	44617	22243	27091	49334	17074	35609	52741	9066	18266	27346
ILL.cshB-BSU25140.29~1345	4381	5106	9487	4282	5199	9481	3817	7536	11354	1843	6205	8048
ILL.csn-BSU26890.12~845	240	232	472	263	291	554	120	199	319	101	97	198
ILL.csoR-BSU33520.10~315	270	220	490	226	274	500	269	329	612	163	169	347
ILL.cspB-BSU09100.69~272	64073	75166	138305	35105	39920	75025	63729	86287	151783	10746	31095	43098
ILL.cspC-BSU05120.89~289	10579	14440	25010	7662	8174	15836	8851	20903	29831	4157	6666	10856
ILL.cspD-BSU21930.26~226	19139	19388	38434	42636	37730	80366	17504	23314	40426	24845	16522	41195
ILL.cspR-BSU08930.1~483	2648	2412	5060	2468	2637	5105	2273	5247	7496	5381	16760	22129
ILL.csrA-BSU35370.1~225	197	190	384	2242	2556	4798	186	212	392	101	134	235
ILL.cssR-BSU33010.11~688	325	217	542	438	352	790	241	207	453	438	195	634
ILL.cssS-BSU33020.1~1356	879	614	1493	935	1023	1958	491	679	1161	730	475	1201
ILL.cstA-BSU28710.9~1805	2222	1358	3577	1340	1405	2745	3033	2689	5721	2596	851	3445
ILL.ctaA-BSU14870.355~1275	1268	2011	3279	1060	1209	2269	1317	1825	3142	1431	1496	2927
ILL.ctaB-BSU14880.1~918	4432	6162	10594	7850	7507	15357	4948	8146	13113	2929	5129	8058
ILL.ctaC-BSU14890.224~1294	303	324	627	2205	2303	4508	423	544	967	1175	551	1725
ILL.ctaD-BSU14900.33~1901	554	601	1155	4069	4443	8512	895	910	1811	1687	809	2502
ILL.ctaE-BSU14910.1~624	215	206	421	1382	1558	2940	262	300	562	429	196	626
ILL.ctaF-BSU14920.1~333	79	114	193	550	638	1188	117	159	277	186	88	273
ILL.ctaG-BSU14930.1~894	144	176	320	1499	1806	3305	209	335	543	507	224	731
ILL.ctaO-BSU12080.118~1107	50	74	124	69	86	155	41	77	118	13	43	56
ILL.ctc-BSU00520.18~632	10233	8865	19095	5137	5439	10576	6066	7540	13609	6011	5518	11529
ILL.ctpA-BSU19590.12~1412	4188	4781	8968	5427	6300	11727	4330	6428	10753	3377	6229	9605
ILL.ctpB-BSU35240.140~1582	63	68	131	120	183	303	78	506	583	622	5807	6434
ILL.ctrA-BSU09460.120~1517	15	25	40	2045	1377	3422	8	1	9	25	13	38
ILL.ctsR-BSU00830.134~598	813	570	1383	616	692	1308	370	2063	2450	328	2916	3248
ILL.cueR-BSU09560.8~439	1420	1368	2788	4267	3979	8246	1102	1831	2937	2052	1316	3372
ILL.cwlA-BSU25900.1~819	13	16	29	15	16	31	17	28	45	245	1019	1264
ILL.cwlC-BSU17410.1~768	97	108	205	124	118	242	44	98	142	99	116	213
ILL.cwlD-BSU01530.60~773	50	32	82	134	101	235	48	98	146	163	1242	1405
ILL.cwlH-BSU25710.45~797	5	3	8	6	9	15	9	13	22	5	32	37
ILL.cwlJ-BSU02600.314~742	49	49	98	87	63	150	37	74	111	30	158	189
ILL.cwlK-BSU02810.60~563	103	95	198	79	92	171	93	124	220	54	82	137
ILL.cwlO-BSU34800.178~1599	34027	33946	67971	37923	43181	81104	17170	50491	67672	33449	45926	79379
ILL.cwlS-BSU19410.274~1518	649	623	1272	2852	2579	5431	383	397	780	117	225	342
ILL.cycB-BSU34160.25~1290	477	249	726	405	399	804	1326	914	2246	1275	402	1661
ILL.cydA-BSU38760.182~1588	26	18	44	22	21	43	108	43	152	10	30	40
ILL.cydB-BSU38750.1~1017	31	24	55	33	38	71	236	28	264	10	14	24
ILL.cydC-BSU38740.1~1704	57	55	112	98	90	188	509	60	569	24	39	65
ILL.cydD-BSU38730.1~1728	88	101	189	82	137	219	770	99	869	26	65	91
ILL.cyeA-BSU18770.1~879	66	57	123	113	119	232	65	116	181	54	145	200
ILL.cyeB-BSU34000.18~935	203	145	348	224	198	422	204	236	443	133	183	316
ILL.cymR-BSU27520.71~487	1166	1287	2453	880	1184	2064	1519	1893	3412	995	2894	3884
ILL.cypA-BSU26740.1~1233	61	96	156	675	664	1339	66	154	222	121	265	386
ILL.cypB-BSU27160.16~3180	1212	838	2050	892	1047	1939	871	805	1659	268	582	848
ILL.cypC-BSU02100.90~1343	31	32	63	46	40	86	46	34	81	138	115	254
ILL.cypX-BSU35060.1~1218	290	338	627	361	370	731	277	339	614	96	269	366
ILL.cysC-BSU15600.1~594	455	236	691	4127	4854	8981	213	136	349	36	242	278
ILL.cysE-BSU00930.125~778	1038	688	1726	1356	1213	2569	616	793	1409	297	1142	1439
ILL.cysH-BSU15570.162~863	862	722	1584	7310	8915	16225	853	444	1297	1044	1107	2151
ILL.cysJ-BSU33440.32~1849	919	743	1661	4546	4518	9064	1773	644	2411	1754	6153	7905
ILL.cysK-BSU00730.1~927	8829	5458	14287	11515	10563	22078	4666	6053	10749	3614	15714	19366
ILL.cysL-BSU37650.6~905	678	467	1145	727	640	1367	615	871	1485	394	857	1251
ILL.cysP-BSU15580.5~1069	659	483	1141	6116	7456	13572	610	281	886	504	645	1146
ILL.cysS-BSU00940.1~1401	2265	1817	4068	3525	3281	6806	1357	1798	3141	718	2150	2866
ILL.czcD-BSU26650.15~950	65	65	130	152	172	324	62	56	118	34	32	66
ILL.czrA-BSU19120.12~335	259	215	473	458	426	884	260	385	664	367	546	913
ILL.dacA-BSU00100.61~1392	13254	12676	25928	7839	9051	16890	8672	17980	26612	7117	17267	24381
ILL.dacB-BSU23190.123~1271	104	106	210	92	170	262	217	540	756	40	953	994
ILL.dacC-BSU18350.33~1508	123	137	260	424	278	702	123	135	259	94	330	425
ILL.dacF-BSU23480.1~1170	4	3	7	14	20	34	29	69	98	16	184	200
ILL.dapA-BSU16770.1~873	8835	7849	16652	18444	19958	38402	7329	9088	16312	5254	13481	18715
ILL.dapB-BSU22490.12~815	1463	1115	2574	1210	1056	2266	973	1258	2242	563	1313	1876
ILL.dapF-BSU32170.20~874	2807	2251	5058	6449	5267	11716	1610	3261	4869	899	3026	3926
ILL.dapG-BSU16760.92~1306	7746	7118	14864	18527	19357	37884	6325	7983	14311	4691	14226	18913
ILL.dapH-BSU14180.21~731	7957	8456	16413	9049	8182	17231	5171	7002	12182	4824	3782	8605
ILL.dapL-BSU14190.70~1194	1751	1818	3569	9462	9707	19169	2146	3529	5687	2598	3934	6547
ILL.dat-BSU09670.1~849	911	787	1696	4229	3813	8042	739	509	1251	1250	892	2139
ILL.dck-BSU00140.1~654	1635	1424	3055	792	739	1531	1086	1320	2399	295	108	403
ILL.dctB-BSU04440.1~1053	455	376	831	434	405	839	521	599	1114	251	217	468
ILL.dctP-BSU04470.1~1266	10782	5079	15861	7058	7375	14433	14093	8524	22633	17014	768	17781
ILL.dctR-BSU04460.1~681	303	260	563	288	266	554	224	324	547	110	174	284
ILL.dctS-BSU04450.70~1677	577	493	1070	623	621	1244	535	667	1202	218	424	642
ILL.ddl-BSU04560.175~1239	8162	7032	15194	4777	4010	8787	6435	6407	12843	1617	2981	4598
ILL.deaD-BSU39110.1~1440	4381	3941	8322	4081	3297	7378	2780	3942	6713	689	839	1529
ILL.def-BSU14560.7~561	1660	1749	3409	1595	1882	3477	1981	2429	4548	705	1183	1898
ILL.def-BSU15720.27~509	613	554	1158	2358	2240	4598	755	906	1691	480	852	1341
ILL.degA-BSU10840.18~1031	610	574	1184	789	745	1534	486	561	1047	348	433	781
ILL.degQ-BSU31720.193~333	47	53	100	228	219	447	58	266	343	309	311	622
ILL.degR-BSU21940.37~219	350	398	741	1449	946	2395	149	126	275	33	215	250
ILL.degS-BSU35500.1~1158	2566	2329	4895	2068	2041	4109	1973	2937	4910	1021	1519	2540
ILL.degU-BSU35490.2~691	2650	2509	5159	2271	2178	4449	2763	3536	6299	1452	2270	3722
ILL.deoC-BSU39420.1~672	3364	2483	5843	2326	2097	4423	3583	3856	7414	3412	2808	6203
ILL.deoD-BSU19630.1~702	3727	3366	7084	2414	1886	4300	2642	3773	6341	1900	3762	5662
ILL.deoR-BSU39430.35~976	1227	1059	2286	1426	1427	2853	1939	1588	3540	766	702	1471
ILL.des-BSU19180.162~1220	443	961	1404	879	1040	1919	62	751	817	140	851	992
ILL.desK-BSU19190.5~1117	143	202	345	364	427	791	87	266	353	139	269	408
ILL.desR-BSU19200.1~600	186	155	341	421	377	798	103	184	288	117	126	243
ILL.dfrA-BSU21810.1~507	1128	941	2069	3092	3243	6335	782	1831	2611	1485	1942	3427
ILL.dgcK-BSU09120.1~1080	2530	2139	4669	829	1004	1833	1662	2677	4339	378	1875	2253
ILL.dgcP-BSU29650.71~1810	2241	2087	4328	1623	1852	3475	1636	2975	4611	1911	3113	5024
ILL.dgcW-BSU13420.334~2583	1014	1106	2120	5187	5587	10774	221	312	533	23	41	64
ILL.dgk-BSU00150.1~624	1452	1346	2798	661	669	1330	1009	1328	2329	301	149	450
ILL.dgkA-BSU25310.1~372	651	599	1250	1804	2214	4018	407	884	1291	464	975	1439
ILL.dgrA-BSU22910.1~654	743	505	1248	977	994	1971	352	471	821	165	703	868
ILL.dhaS-BSU19310.106~1593	3106	2666	5772	5146	4959	10105	3016	4223	7235	13190	3806	16989
ILL.dhbA-BSU32000.122~907	1255	876	2129	528	200	728	681	472	1154	55	88	143
ILL.dhbB-BSU31970.1~939	1130	777	1907	580	232	812	463	405	868	44	48	92
ILL.dhbC-BSU31990.26~1222	1671	1193	2862	854	299	1153	1132	699	1830	94	118	213
ILL.dhbE-BSU31980.1~1620	1731	1370	3100	888	291	1179	1167	709	1876	83	115	198
ILL.dhbF-BSU31960.1~7137	5671	4012	9683	4891	1765	6656	1262	959	2222	166	135	301
ILL.dinB-BSU05630.14~532	527	394	921	183	133	316	290	487	780	1655	1104	2762
ILL.dinF-BSU21710.72~1409	491	547	1037	6290	6763	13053	921	2386	3305	1604	4221	5826
ILL.dinG-BSU22400.1~2796	8200	7000	15200	15977	15700	31677	9718	12457	22173	3242	7782	11026
ILL.divIB-BSU15240.88~879	1257	1037	2288	3170	4057	7227	1249	1929	3254	677	1683	2395
ILL.divIC-BSU00620.18~395	2231	2151	4382	2920	3695	6615	1425	2602	4024	193	1163	1356
ILL.divIVA-BSU15420.1~495	4238	4363	8598	8584	8138	16722	4068	5708	9870	4673	3087	7801
ILL.dltA-BSU38500.1~1512	22599	19767	42362	14978	19935	34913	9083	14977	24188	280	2522	2809
ILL.dltB-BSU38510.1~1188	15671	14322	29993	10788	18098	28886	5063	11150	16210	138	1997	2135
ILL.dltC-BSU38520.17~253	2717	2014	4720	1447	2227	3674	663	1529	2181	13	288	302
ILL.dltD-BSU38530.1~1179	17868	16670	34537	13597	18764	32361	7113	12239	19464	141	1769	1912
ILL.dltE-BSU38540.1~759	12856	12215	25070	8820	12240	21060	5854	8812	14689	253	1308	1562
ILL.dnaA-BSU00010.281~1621	14577	11517	26094	10873	12521	23394	5560	15108	20668	6780	10277	17057
ILL.dnaB-BSU28990.115~1533	1689	1286	2975	8279	8221	16500	1488	3139	4631	5173	9678	14850
ILL.dnaC-BSU40440.25~1389	4086	3947	8033	1921	1946	3867	3052	5347	8402	1169	3152	4321
ILL.dnaD-BSU22350.77~775	2309	2111	4420	13202	14364	27566	1873	4067	5924	3930	8729	12656
ILL.dnaE-BSU29230.1~3348	5138	4784	9922	4922	4927	9849	4642	5057	9712	3678	3740	7424
ILL.dnaG-BSU25210.1~1812	13670	12721	26391	13252	12472	25724	6572	15691	22275	3607	28893	32498
ILL.dnaI-BSU28980.1~936	1303	1022	2325	6054	6784	12838	1114	2362	3497	2814	6433	9253
ILL.dnaJ-BSU25460.200~1327	5760	5820	11576	3717	5252	8969	3352	7756	11083	1099	6543	7645
ILL.dnaK-BSU25470.24~1859	23156	21304	44449	15237	16545	31782	19421	28830	48169	7515	18193	25709
ILL.dnaN-BSU00020.179~1315	9468	7250	16718	11322	12198	23520	4838	14589	19423	6488	8515	15001
ILL.dnaX-BSU00190.36~1727	5859	5188	11047	8634	6961	15595	6493	10452	16907	10203	29518	39721
ILL.dppA-BSU12920.12~836	52	83	135	936	668	1604	47	21	68	109	83	192
ILL.dppB-BSU12930.1~927	26	18	44	240	208	448	30	7	37	22	64	86
ILL.dppC-BSU12940.1~963	13	13	26	114	97	211	9	7	16	28	59	88
ILL.dppD-BSU12950.1~1008	12	17	29	141	96	237	5	4	9	20	41	61
ILL.dppE-BSU12960.3~1652	53	50	103	389	270	659	43	44	87	53	103	156
ILL.dprA-BSU16110.61~954	786	734	1520	2877	3292	6169	216	930	1149	960	1809	2768
ILL.dps-BSU30650.1~438	1770	1972	3740	4850	3439	8289	1160	1305	2460	3330	724	4051
ILL.drm-BSU23500.1~1185	12639	11121	23759	8058	9745	17803	12701	18551	31270	4510	9633	14149
ILL.dsdA-BSU23770.76~1422	839	675	1514	1237	1050	2287	692	778	1469	313	442	755
ILL.dtpT-BSU03670.1~1479	3231	1877	5108	466	445	911	4550	5285	9781	4930	4249	9176
ILL.dusB-BSU00810.24~1025	6468	5393	11859	9217	9040	18257	4319	6983	11262	2028	6382	8410
ILL.dusC-BSU08030.41~1018	1839	1677	3515	1319	1652	2971	892	2829	3725	774	2691	3467
ILL.dxr-BSU16550.1~1152	5472	4968	10440	11145	10519	21664	7088	12878	19957	3259	12363	15620
ILL.dxs-BSU24270.1~1902	5895	6253	12148	10082	10484	20566	7938	8880	16805	4086	6956	11044
ILL.eag-BSU13650.81~512	108	121	229	472	525	997	190	405	595	195	447	640
ILL.ebrA-BSU17300.7~324	115	90	205	119	85	204	62	101	164	37	183	220
ILL.ebrB-BSU17290.5~358	118	124	242	149	105	254	94	133	227	63	218	281
ILL.ecsA-BSU10040.378~1121	1007	851	1858	826	692	1518	517	550	1067	481	396	877
ILL.ecsB-BSU10050.1~1227	1602	1387	2989	1527	1172	2699	1020	1154	2180	748	720	1471
ILL.ecsC-BSU10060.18~728	1252	1229	2481	1094	958	2052	757	1040	1787	501	587	1087
ILL.efeM-BSU38270.1~1158	5315	4392	9695	4792	3029	7821	2369	4604	6966	1237	1578	2813
ILL.efeN-BSU38260.19~1269	6886	5932	12817	6321	4182	10503	3569	6345	9913	1538	1950	3488
ILL.efeU-BSU38280.25~1470	2864	2429	5292	3127	1559	4686	1575	2672	4241	1229	1161	2390
ILL.efp-BSU24450.25~582	10602	9573	20175	7049	6933	13982	10440	13177	23614	5109	7573	12682
ILL.eglS-BSU18130.34~1533	208	149	357	504	570	1074	131	180	312	425	762	1188
ILL.endB-BSU04650.18~299	8078	6701	14775	5592	5666	11258	4810	6208	11079	3375	4760	8169
ILL.engA-BSU22840.27~1337	7953	7654	15574	7994	10083	18077	4668	10717	15355	2578	9365	11934
ILL.engB-BSU28190.1~588	2340	2380	4720	3311	2904	6215	1478	2164	3660	1580	2364	3951
ILL.eno-BSU33900.30~1322	40864	34937	75797	28106	22080	50186	49837	53595	103283	3006	8895	11899
ILL.epr-BSU38400.9~1946	3250	3551	6786	36071	39300	75371	624	771	1398	24	17	41
ILL.epsA-BSU34370.38~742	79	120	199	29	21	50	10	11	21	7	13	20
ILL.epsB-BSU34360.6~689	107	120	226	24	15	39	12	30	42	3	3	6
ILL.epsC-BSU34350.1~1797	283	293	576	363	435	798	66	68	134	29	51	80
ILL.epsD-BSU34340.1~1146	175	184	359	162	188	350	47	49	96	15	36	51
ILL.epsE-BSU34330.1~837	103	111	214	97	87	184	18	24	42	4	15	19
ILL.epsF-BSU34320.1~1155	96	99	195	64	57	121	33	33	66	5	47	52
ILL.epsG-BSU34310.1~1104	53	66	119	30	33	63	24	28	52	2	21	23
ILL.epsH-BSU34300.25~1059	42	94	136	25	30	55	17	25	42	6	18	24
ILL.epsI-BSU34290.5~1081	83	78	161	36	52	88	29	28	58	4	13	17
ILL.epsJ-BSU34280.1~1035	91	107	198	46	63	109	35	48	83	7	89	96
ILL.epsK-BSU34265.1~1518	127	115	242	67	73	140	36	56	92	10	70	80
ILL.epsL-BSU34250.1~609	43	70	113	38	42	80	25	27	53	2	29	31
ILL.epsM-BSU34240.1~651	56	65	121	19	39	58	29	22	52	6	15	21
ILL.epsN-BSU34230.5~1171	104	155	259	40	70	110	27	38	65	9	36	45
ILL.epsO-BSU34220.1~969	97	113	210	42	55	97	22	41	63	15	37	52
ILL.era-BSU25290.1~906	4934	4913	9847	12618	15035	27653	4250	7049	11318	5142	7854	12999
ILL.estA-BSU02700.18~656	630	613	1243	294	309	603	547	834	1381	29	120	149
ILL.estB-BSU08350.6~638	810	807	1610	528	630	1158	610	632	1261	92	288	387
ILL.etfA-BSU28520.12~989	1330	1013	2343	1134	1243	2377	1031	1284	2314	10245	863	11104
ILL.etfB-BSU28530.15~788	991	784	1765	1025	986	2011	681	1015	1698	7319	811	8052
ILL.eutD-BSU37660.43~1014	22390	25546	47936	9342	7077	16419	15025	21753	36796	3620	10428	14053
ILL.exlX-BSU18630.1~699	345	352	697	362	299	661	387	434	819	248	390	633
ILL.exoA-BSU22010.13~903	1089	1158	2247	1775	2096	3871	1400	2220	3617	1322	3666	4992
ILL.exoAA-BSU40880.9~767	493	532	1018	1086	1525	2611	1404	3000	4481	739	5421	6275
ILL.exuM-BSU12310.68~1447	16	8	24	6	16	22	83	57	140	153	104	258
ILL.exuR-BSU12370.25~1026	677	585	1262	1200	1255	2455	430	660	1092	363	312	675
ILL.exuT-BSU12360.1~1269	27	18	45	33	44	77	19	20	41	21	51	72
ILL.ezrA-BSU29610.1~1689	9850	9961	19811	13138	12845	25983	10134	11128	21272	4944	4187	9136
ILL.fabD-BSU15900.1~954	5816	6773	12579	5101	6801	11902	4264	9087	13409	1347	3347	4706
ILL.fabF-BSU11340.23~1264	7594	12424	20018	3987	6977	10964	7163	13027	20183	1936	5281	7215
ILL.fabG-BSU15910.1~741	6150	6861	12991	6000	7017	13017	5334	8711	14279	1472	3057	4550
ILL.fabG-BSU16870.55~783	484	372	856	1109	1165	2274	1189	1448	2635	828	2939	3795
ILL.fabG-BSU18500.21~737	4686	4271	8940	1347	1129	2476	3388	5623	8932	1531	5660	7181
ILL.fabG-BSU29420.41~808	1539	1178	2717	810	651	1461	1163	1369	2538	1165	1473	2639
ILL.fabHA-BSU11330.1~939	4550	6778	11317	2514	5141	7655	2671	8081	10928	926	3570	4558
ILL.fabHB-BSU10170.2~979	426	1033	1459	378	1074	1452	533	1141	1669	47	125	172
ILL.fabI-BSU11720.136~912	9770	13456	23226	4763	8595	13358	10313	18802	29115	4683	7899	12582
ILL.fabL-BSU08650.1~753	3277	3209	6479	1979	1874	3853	2120	2974	5160	906	1824	2733
ILL.fabZ-BSU36370.51~476	2375	2313	4686	1739	1682	3421	1143	2168	3371	873	2075	2968
ILL.fadE-BSU32820.15~1799	382	260	642	654	532	1186	231	236	467	6928	266	7190
ILL.fadF-BSU37180.37~2154	226	147	373	234	273	507	467	392	856	8481	680	9160
ILL.fadG-BSU14071.1~1731	918	608	1526	645	759	1404	390	731	1122	2471	1131	3603
ILL.fadM-BSU32850.1~909	4	4	8	6	2	8	6	7	13	3	8	11
ILL.fadN-BSU32840.1~2448	432	256	687	725	618	1343	259	180	439	14074	418	14478
ILL.fadR-BSU28550.6~590	514	368	882	472	452	924	347	528	858	3920	452	4368
ILL.fbaA-BSU37120.73~930	68912	63774	132275	49849	48226	98075	77745	78998	155584	22852	34205	56981
ILL.fbp-BSU40190.1~2016	2667	1943	4610	1864	1865	3729	1378	1947	3323	642	675	1317
ILL.fdhD-BSU36710.19~807	837	836	1657	1071	1102	2173	908	1152	2048	585	2998	3580
ILL.fer-BSU23040.72~320	4031	4494	8525	5557	4498	10055	6491	5550	12023	3653	2531	6184
ILL.feuA-BSU01630.1~954	1652	1162	2812	541	275	816	1200	1111	2304	177	131	308
ILL.feuB-BSU01620.1~1005	675	549	1224	330	168	498	370	525	900	90	117	207
ILL.feuC-BSU01610.1~1011	644	582	1226	332	197	529	393	559	949	67	132	199
ILL.ffh-BSU15980.14~1354	20054	24166	44220	18467	23379	41846	18840	23729	42728	5179	9007	14190
ILL.fhuB-BSU33310.1~1155	1498	1485	2983	724	442	1166	2260	1665	3925	483	1738	2227
ILL.fhuC-BSU33290.16~825	2563	2366	4923	1479	958	2437	2514	2424	4960	484	1131	1616
ILL.fhuD-BSU33320.37~984	6148	5725	11873	3632	1729	5361	11175	9037	20206	2941	3219	6160
ILL.fhuG-BSU33300.1~1011	1583	1606	3188	1187	694	1881	2055	1629	3685	467	1380	1848
ILL.flgB-BSU16180.49~438	1248	976	2224	2970	3653	6623	529	760	1293	552	614	1170
ILL.flgC-BSU16190.1~453	1316	1142	2449	4185	4039	8224	813	797	1558	588	547	1131
ILL.flgD-BSU16280.1~423	1175	1079	2249	4248	5499	9747	324	466	793	131	179	310
ILL.flgG-BSU16290.22~816	2918	2566	5450	11147	13780	24927	758	1084	1858	298	357	656
ILL.flgK-BSU35410.13~1536	5685	5586	11259	34320	42712	77032	1817	2290	4126	431	608	1046
ILL.flgL-BSU35400.11~907	3469	3962	7418	21697	28278	49975	1182	1532	2692	192	305	490
ILL.flgM-BSU35430.81~347	1128	1033	2161	5485	7288	12773	315	476	793	93	159	252
ILL.flhA-BSU16390.1~2034	7813	6966	14757	27137	29729	56866	4556	8402	12961	1404	5945	7349
ILL.flhB-BSU16380.1~1083	2476	2118	4586	10404	11015	21419	637	945	1579	61	113	176
ILL.flhF-BSU16400.1~1101	1875	1595	3470	9132	9992	19124	482	741	1223	37	62	99
ILL.flhO-BSU36400.66~878	3251	3377	6628	9754	12400	22154	1551	2881	4431	356	2002	2358
ILL.flhP-BSU36390.34~843	2906	3273	6177	10133	13634	23767	1592	2392	3954	307	1337	1645
ILL.fliD-BSU35340.18~1514	7674	7620	15294	32105	34111	66216	1938	2759	4690	246	636	882
ILL.fliE-BSU16200.1~321	1094	926	2020	2819	3483	6302	437	661	1098	299	426	725
ILL.fliF-BSU16210.8~1618	5686	4530	10216	16655	18273	34928	2260	2931	5183	1324	1616	2939
ILL.fliG-BSU16220.13~1029	3771	2839	6600	12217	13604	25821	1382	1761	3159	510	877	1389
ILL.fliH-BSU16230.1~627	1665	1407	3072	5984	6114	12098	634	860	1493	259	344	602
ILL.fliI-BSU16240.1~1317	4640	3724	8364	15475	16325	31800	1564	2165	3729	684	861	1543
ILL.fliJ-BSU16250.3~446	1140	844	1972	1861	3974	5835	131	523	652	111	195	304
ILL.fliK-BSU16270.1~1464	4989	3878	8866	18104	18433	36537	1362	1818	3182	510	621	1131
ILL.fliL-BSU16300.1~423	797	624	1414	2511	3103	5614	158	277	427	37	49	86
ILL.fliM-BSU16310.34~1032	3523	2815	6328	12583	12765	25348	927	1268	2215	187	247	437
ILL.fliP-BSU16350.1~666	1621	1243	2859	5901	7346	13247	324	628	953	40	77	117
ILL.fliQ-BSU16360.1~270	450	373	822	1936	1825	3761	105	155	281	5	17	24
ILL.fliR-BSU16370.1~780	1430	1253	2683	5698	6863	12561	391	581	976	42	77	119
ILL.fliS-BSU35330.1~402	1485	1588	3071	6245	7957	14202	368	499	869	44	136	181
ILL.fliT-BSU35320.1~342	1678	1763	3437	6999	9210	16209	369	612	935	58	149	207
ILL.fliY-BSU16320.1~1137	4327	3674	7990	16396	16668	33064	1430	1781	3206	238	356	598
ILL.fliZ-BSU16340.13~672	1832	1418	3250	6802	7446	14248	509	731	1243	65	87	152
ILL.fmnP-BSU23050.106~678	794	832	1623	1956	1789	3745	2182	2613	4744	2931	2112	5050
ILL.fmt-BSU15730.5~958	1805	1499	3302	7327	7660	14987	2233	2985	5249	1406	2603	4011
ILL.fni-BSU22870.1~1050	3646	3642	7284	16714	13537	30251	2591	3969	6520	9033	9823	18851
ILL.fnr-BSU37310.5~721	217	199	415	217	166	383	116	155	269	78	120	198
ILL.folB-BSU00780.1~363	705	525	1228	1449	1286	2735	540	565	1166	217	805	1091
ILL.folC-BSU28080.60~1352	2402	1836	4238	1110	1009	2119	1803	2498	4301	214	1264	1478
ILL.folD-BSU24310.12~863	7415	7622	15037	9459	8845	18304	6313	10860	17357	4561	4630	9254
ILL.folE-BSU22780.188~760	4678	4706	9355	15638	15932	31570	7854	14179	22183	16182	48602	65641
ILL.folK-BSU00790.1~504	1686	1257	2943	2464	2519	4983	1388	1503	2940	589	1844	2474
ILL.frlB-BSU32610.3~989	147	238	385	28729	16431	45160	33	108	141	177	487	664
ILL.frlD-BSU32570.1~855	83	56	139	1830	831	2661	59	87	146	32	101	133
ILL.frlM-BSU32580.1~903	2	10	12	1816	782	2598	1	7	8	7	25	32
ILL.frlN-BSU32590.58~936	16	27	43	2713	1609	4322	4	12	16	18	76	95
ILL.frlO-BSU32600.72~1340	46	59	105	7819	4706	12525	15	19	34	42	234	276
ILL.frlR-BSU32560.1~789	390	351	741	1274	1644	2918	458	623	1083	561	581	1143
ILL.frr-BSU16520.1~558	12074	10837	22908	10177	10262	20439	9066	14542	24357	3452	12358	16012
ILL.fruA-BSU14400.1~1908	2328	1993	4321	2568	3213	5781	2849	3920	6767	2597	2556	5153
ILL.fruK-BSU14390.1~912	1047	822	1869	1041	1257	2298	1249	1432	2665	1074	1239	2311
ILL.fruR-BSU14380.8~763	732	572	1304	717	955	1672	948	1113	2060	994	1022	2017
ILL.ftsA-BSU15280.2~1324	10443	8925	19318	15709	16452	32161	7933	11920	19858	6957	10337	17293
ILL.ftsE-BSU35260.114~800	3687	4340	8027	4326	5473	9799	1792	7138	8928	4958	13239	18194
ILL.ftsH-BSU00690.1~1914	54392	50619	105006	35906	33195	69101	39078	51713	90742	26042	42071	68097
ILL.ftsL-BSU15150.1~354	1545	1486	3008	2118	2274	4392	1635	1677	3267	1646	1637	3287
ILL.ftsR-BSU18420.35~892	335	320	655	511	571	1082	134	360	494	253	479	732
ILL.ftsW-BSU14850.206~1417	2137	2241	4378	11480	10554	22034	3580	9747	13334	7592	13735	21327
ILL.ftsX-BSU35250.1~891	4858	6050	10892	6890	7985	14875	3919	9991	13904	8759	17538	26315
ILL.ftsY-BSU15950.1~990	4298	4322	8613	11691	11505	23196	4922	5952	10869	2643	5557	8200
ILL.ftsZ-BSU15290.1~1149	12398	12518	24910	23487	26817	50304	11660	16175	28039	8965	11386	20395
ILL.fumC-BSU33040.1~1389	11362	12869	24231	10886	8431	19317	13844	14189	28048	2891	5538	8433
ILL.fur-BSU23520.10~459	2603	2862	5463	2077	1942	4019	4101	3743	7700	1677	2835	4512
ILL.fusA-BSU01120.54~2132	417634	351476	768970	222934	328169	551103	250757	319818	571682	23055	95150	118303
ILL.fxsA-BSU29170.87~470	3114	2815	5928	3879	4108	7987	3714	6142	9937	2199	4130	6359
ILL.gabD-BSU03910.1~1389	1514	1232	2745	811	613	1424	868	870	1745	1238	698	1935
ILL.gabP-BSU06310.9~1418	272	252	524	2039	1193	3232	154	92	246	496	338	834
ILL.gabR-BSU03890.1~1440	104	105	209	218	200	418	47	69	116	258	135	392
ILL.gabT-BSU03900.107~1417	44	52	96	182	151	333	39	63	102	23	122	145
ILL.galE-BSU38860.1~1020	7044	7097	14141	6437	6334	12771	6431	7114	13562	3276	3183	6466
ILL.galK-BSU38200.81~1253	918	792	1701	886	1037	1923	768	941	1702	329	355	684
ILL.galT-BSU38190.1~1542	1779	1575	3354	1744	1817	3561	1546	2013	3569	762	597	1359
ILL.ganA-BSU34130.19~2082	574	339	913	516	474	990	573	599	1172	395	272	667
ILL.ganB-BSU34120.1~1290	135	98	233	138	135	273	200	264	466	163	100	264
ILL.ganP-BSU34150.1~1257	361	160	521	242	271	513	569	452	1022	406	214	621
ILL.ganQ-BSU34140.1~852	174	93	267	151	142	293	241	219	460	207	155	362
ILL.ganR-BSU34170.44~1036	297	230	527	363	388	751	203	399	604	135	300	435
ILL.gapA-BSU33940.13~1020	56854	57073	113905	43144	38751	81895	64497	90556	155620	5567	19538	25174
ILL.gapB-BSU29020.36~1058	541	373	914	217	263	480	217	587	804	58523	351	58870
ILL.garD-BSU02510.91~1623	303	276	579	649	737	1386	566	743	1310	526	864	1392
ILL.gatA-BSU06680.1~1458	19982	17254	37235	12174	10018	22192	14179	21987	36166	5110	9901	15011
ILL.gatB-BSU06690.1~1431	20524	18212	38736	14011	11393	25404	17194	23388	40598	5608	9022	14632
ILL.gatC-BSU06670.103~393	4971	3771	8741	2115	2044	4159	2529	4653	7200	1133	2526	3661
ILL.gbsA-BSU31060.16~1488	88	95	183	301	266	567	52	76	128	22	94	116
ILL.gbsB-BSU31050.1~1209	163	128	291	324	279	603	98	98	196	52	148	200
ILL.gcp-BSU05940.1~1041	1246	1367	2613	10992	11671	22663	2306	7264	9569	6284	32652	38940
ILL.gcvPA-BSU24560.30~1376	892	733	1624	1528	1409	2937	526	293	813	523	447	970
ILL.gcvPB-BSU24550.1~1467	1125	910	2035	1906	2056	3962	524	373	898	620	509	1129
ILL.gcvT-BSU24570.74~1162	797	623	1420	1275	1138	2413	719	352	1071	635	515	1153
ILL.gdh-BSU03930.1~786	11	6	17	15	15	30	11	14	25	10	103	113
ILL.gerAA-BSU33050.1~1449	10	11	21	19	17	36	4	27	31	8	51	59
ILL.gerAB-BSU33060.1~1098	12	4	16	18	12	30	4	7	11	2	17	19
ILL.gerAC-BSU33070.1~1122	20	12	32	26	31	57	8	16	24	8	46	54
ILL.gerBA-BSU35800.1~1452	15	16	31	23	19	42	19	24	43	7	14	21
ILL.gerBB-BSU35810.6~1112	31	29	60	37	58	95	37	53	90	15	49	64
ILL.gerBC-BSU35820.1~1125	109	85	194	80	112	192	83	136	219	53	128	181
ILL.gerD-BSU01550.1~558	9	13	22	10	6	16	11	9	20	5	14	19
ILL.gerE-BSU28410.7~231	275	195	465	928	684	1612	576	587	1189	1095	807	1912
ILL.gerKA-BSU03700.1~1635	71	46	117	56	67	123	51	78	130	33	164	200
ILL.gerKB-BSU03720.25~1146	107	65	172	104	142	246	82	106	188	39	130	169
ILL.gerKC-BSU03710.1~1224	61	48	109	75	87	162	35	87	121	11	128	140
ILL.gerM-BSU28380.1~1101	78	69	147	121	111	232	224	492	716	266	1477	1744
ILL.gerPA-BSU10720.1~222	5	1	6	1	7	8	0	8	8	2	8	10
ILL.gerPB-BSU10710.1~243	2	4	6	0	0	0	0	0	0	3	2	5
ILL.gerPC-BSU10700.23~640	11	13	24	5	10	15	6	22	28	14	26	40
ILL.gerPD-BSU10690.1~177	1	1	2	0	1	1	0	3	3	3	6	9
ILL.gerPE-BSU10680.1~402	3	6	9	7	8	15	6	11	17	6	12	18
ILL.gerPF-BSU10670.23~250	7	11	18	4	4	8	5	12	17	1	14	15
ILL.gerT-BSU19490.1~474	5	2	7	3	2	5	3	5	8	7	32	39
ILL.ggaA-BSU35690.1106~2446	2747	2073	4812	5096	10233	15329	181	2547	2739	1038	3681	4728
ILL.ggaB-BSU35680.1~2703	4084	3556	7639	16975	32727	49702	523	3834	4358	622	2664	3286
ILL.ggt-BSU18410.21~1784	17	15	32	64	59	123	30	13	43	94	22	116
ILL.gid-BSU16130.76~1383	2906	2741	5647	7310	8955	16265	2701	5289	7992	1197	4193	5393
ILL.gidA-BSU41010.1~1887	8765	7390	16155	7229	9010	16239	4719	8351	13082	2029	8395	10424
ILL.gidB-BSU41000.14~733	4491	3732	8222	3282	4616	7898	1764	4280	6089	556	2310	2867
ILL.glcD-BSU28680.1~1413	2251	2372	4622	11601	16166	27767	1432	474	1897	2700	1007	3707
ILL.glcF-BSU28690.1~1335	1539	1944	3483	9274	12173	21447	821	480	1301	1965	742	2709
ILL.glcK-BSU24850.11~976	995	836	1831	2168	2483	4651	712	918	1625	642	2102	2743
ILL.glcP-BSU10520.29~1234	123	85	208	155	216	371	48	160	208	53	138	191
ILL.glcR-BSU36300.21~797	353	323	676	798	866	1664	140	423	563	42	243	286
ILL.glcT-BSU13880.8~874	2102	1773	3875	1792	2390	4182	1688	2981	4675	908	1745	2650
ILL.glcU-BSU03920.1~864	3	2	5	5	1	6	2	7	9	11	51	62
ILL.glgA-BSU30950.1~1455	102	73	175	724	950	1674	581	2400	2993	2912	37876	40928
ILL.glgB-BSU30980.17~1900	44	59	103	720	756	1476	173	3641	3815	6718	42191	48928
ILL.glgC-BSU30970.1~1143	55	50	105	492	615	1107	199	1884	2088	3357	27778	31184
ILL.glgD-BSU30960.24~1055	46	45	91	475	601	1076	320	1673	2008	3167	27630	30869
ILL.glgP-BSU30940.1~2397	138	144	282	1019	1053	2072	1326	3865	5215	3624	45500	49256
ILL.glmM-BSU01770.1~1347	6452	5433	11882	6268	6602	12870	5367	11788	17129	3662	49999	53665
ILL.glmS-BSU01780.90~1892	32874	29322	62183	26904	25942	52846	22501	33604	55833	87926	18670	106539
ILL.glmU-BSU00500.43~1413	20981	18216	39196	9778	9885	19663	12545	16342	28865	2564	13111	15686
ILL.glnA-BSU17460.1~1335	33754	32729	66476	39253	37041	76294	23423	46739	70709	11687	16670	28447
ILL.glnH-BSU27440.1~822	4	2	6	2	5	7	0	3	3	1	6	7
ILL.glnJ-BSU02440.116~1348	287	296	583	314	320	634	311	380	692	241	260	501
ILL.glnK-BSU36520.1~351	207	106	313	155	132	287	101	99	200	409	88	496
ILL.glnL-BSU02450.11~955	388	380	768	320	287	607	265	337	591	129	150	278
ILL.glnM-BSU27450.1~651	1	1	2	0	1	1	0	0	0	0	4	4
ILL.glnP-BSU27460.1~657	3	3	6	2	2	4	0	2	2	1	3	4
ILL.glnQ-BSU27430.1~729	0	0	0	2	0	2	1	1	2	1	2	3
ILL.glnR-BSU17450.1~408	3178	2913	6089	3031	3718	6749	750	5096	5846	1001	1457	2458
ILL.glnT-BSU02420.1~1437	28	28	56	14	19	33	16	32	48	22	25	47
ILL.glpD-BSU09300.38~1705	958	687	1645	1750	1615	3365	1753	2589	4347	3376	9249	12629
ILL.glpF-BSU09280.126~950	2509	1534	4041	1190	1330	2520	9354	8066	17388	20863	14959	35814
ILL.glpG-BSU24870.1~1524	724	658	1382	1773	1883	3656	721	1013	1732	1366	5770	7137
ILL.glpK-BSU09290.1~1491	7162	4987	12149	3444	3714	7158	16720	18468	35172	40291	29244	69585
ILL.glpP-BSU09270.1~579	1326	1089	2415	1797	1941	3738	1174	1707	2883	1176	529	1704
ILL.glpQ-BSU02130.99~980	5342	2856	8197	682	815	1497	4388	6415	10818	10571	5349	15922
ILL.glpT-BSU02140.1~1335	5110	2754	7862	752	789	1541	4745	6567	11316	12000	6317	18315
ILL.glpX-BSU37090.31~996	7048	6482	13528	15783	15553	31336	8826	9524	18401	5067	5925	10994
ILL.gltA-BSU18450.47~4609	1342	1643	2985	67069	60516	127585	3577	6385	9959	6529	9161	15682
ILL.gltC-BSU18460.31~933	762	750	1512	1548	1605	3153	871	1120	1971	1193	1190	2356
ILL.gltD-BSU18440.17~1498	543	817	1360	31759	33105	64864	2689	2500	5192	1187	2541	3726
ILL.gltP-BSU02340.1~1245	34	25	59	67	42	109	113	56	169	66	79	145
ILL.gltR-BSU26670.6~896	291	198	489	260	192	452	71	235	310	67	243	313
ILL.gltT-BSU10220.66~1355	19851	18550	38386	16587	12806	29393	11952	17059	29022	8252	13256	21510
ILL.gltX-BSU00920.1~1452	12860	11392	24250	18393	17639	36032	7391	14915	22266	5748	14311	20067
ILL.glxK-BSU40040.25~1173	277	258	535	239	235	474	193	228	421	138	113	251
ILL.glyA-BSU36900.1~1248	22259	20078	42320	37170	31074	68244	11855	19861	31619	6302	7820	14122
ILL.glyQ-BSU25270.83~970	3913	3370	7279	3949	4329	8278	1690	3579	5268	4034	21302	25346
ILL.glyS-BSU25260.1~2040	8680	8213	16893	9952	11340	21292	4864	8231	13095	8614	44398	53012
ILL.gmk-BSU15680.1~615	7095	6286	13378	5836	6584	12420	4327	7477	11784	1729	3201	4933
ILL.gmuA-BSU05820.1~333	132	96	227	40	49	89	231	186	409	952	373	1323
ILL.gmuB-BSU05810.1~312	211	103	314	45	66	111	248	195	446	1032	447	1486
ILL.gmuC-BSU05830.1~1329	936	474	1410	264	278	542	1146	1016	2158	4033	1810	5840
ILL.gmuD-BSU05840.1~1398	1120	562	1682	316	376	692	1099	1121	2220	2992	1665	4657
ILL.gmuE-BSU05860.29~928	679	406	1085	295	326	621	332	363	689	366	215	579
ILL.gmuF-BSU05870.1~948	799	326	1125	222	214	436	161	188	350	129	50	177
ILL.gmuG-BSU05880.1~1089	922	504	1426	273	268	541	191	246	437	193	70	263
ILL.gmuR-BSU05850.22~735	565	327	892	291	307	598	468	499	980	974	615	1590
ILL.gntK-BSU40060.1~1542	707	428	1135	810	911	1721	875	1066	1940	1527	1230	2756
ILL.gntP-BSU40070.1~1347	3967	2787	6754	2231	2494	4725	2807	3815	6623	1303	1690	2993
ILL.gntR-BSU40050.16~747	227	91	317	238	220	458	238	315	535	811	566	1361
ILL.gntZ-BSU40080.4~1410	10699	8696	19395	6005	6700	12705	7204	11763	18966	1805	4357	6163
ILL.gpr-BSU25540.154~1260	25	35	60	344	380	724	80	87	167	181	525	706
ILL.gpsA-BSU22830.1~1038	8461	8152	16613	9712	12047	21759	6236	11891	18100	3609	11207	14816
ILL.greA-BSU27320.77~550	8098	8700	16761	8696	9124	17820	5250	10033	15294	4173	9024	13235
ILL.groEL-BSU06030.1~1635	82159	64130	146255	32644	13087	45731	44272	46993	91198	40599	38614	79190
ILL.groES-BSU06020.10~294	15589	10652	26221	4264	1795	6059	6138	7245	13279	6094	6956	13018
ILL.grpE-BSU25480.1~564	7883	6368	14246	4180	4280	8460	5418	8522	13922	1929	5758	7706
ILL.gsaB-BSU08710.23~1312	3262	3244	6506	2919	3195	6114	2982	3731	6712	1213	2016	3229
ILL.gsiB-BSU04400.13~384	8	10	17	55	45	100	21	30	51	1436	151	1578
ILL.gspA-BSU38430.1~861	95	48	143	154	104	258	132	74	206	1494	221	1715
ILL.gtaB-BSU35670.73~951	10091	9704	19782	8781	6916	15697	9595	10464	20041	6811	4604	11401
ILL.guaA-BSU06360.88~1629	28336	25378	53711	32664	29308	61972	12812	32344	45086	6268	18671	24940
ILL.guaB-BSU00090.1~1467	43022	36983	79979	58880	54353	113233	20740	30355	51208	19891	25074	45027
ILL.guaC-BSU32130.44~1024	990	975	1965	282	372	654	477	1200	1678	295	863	1158
ILL.guaD-BSU13170.125~595	31	22	53	121	80	201	12	17	29	170	376	546
ILL.gudB-BSU22960.39~1322	19553	20192	39734	19757	19275	39032	16356	20331	36695	13760	12302	26074
ILL.gudD-BSU02490.1~1368	20	22	42	85	65	150	26	17	43	8	22	30
ILL.gudP-BSU02480.1~1368	51	60	111	141	169	310	107	58	167	21	46	67
ILL.gutB-BSU06150.109~1170	243	198	441	206	221	427	197	214	411	161	170	331
ILL.gutP-BSU06160.74~1465	95	67	162	158	187	345	62	51	114	50	63	113
ILL.gutR-BSU06140.4~2493	1639	1185	2824	1346	1280	2626	1277	1428	2703	919	713	1632
ILL.gyrA-BSU00070.211~2676	26118	24320	50438	35145	44296	79441	26159	36821	62982	9729	15710	25439
ILL.gyrB-BSU00060.17~1933	14503	14765	29268	21312	24979	46291	11427	17041	28462	5812	8919	14728
ILL.hag-BSU35360.95~1009	82266	99961	182203	475282	661582	1136860	26219	27511	53588	1161	1165	2327
ILL.hbs-BSU22790.200~478	73991	72694	146685	46547	39509	86056	59068	77429	136535	54722	82741	137477
ILL.helD-BSU33450.54~2378	3610	3279	6888	2175	2159	4334	1223	3391	4616	7655	33772	41433
ILL.hemA-BSU28170.75~1442	3411	3438	6845	5318	5020	10338	3477	3934	7410	3330	4699	8030
ILL.hemAT-BSU10380.1~1299	2944	2861	5805	10649	11737	22386	546	745	1291	22	62	84
ILL.hemB-BSU28130.1~975	2233	2203	4436	6142	7039	13181	2009	2964	4974	1222	2980	4202
ILL.hemC-BSU28150.33~977	1358	1276	2634	3921	4252	8173	955	1748	2703	980	2438	3419
ILL.hemD-BSU12230.39~851	1058	977	2035	2128	1496	3624	425	910	1337	755	949	1703
ILL.hemD-BSU28140.1~789	1213	1168	2381	3035	3500	6535	944	1506	2448	612	1818	2430
ILL.hemE-BSU10120.38~1099	1913	1878	3770	1332	1456	2788	969	1457	2408	445	1158	1600
ILL.hemH-BSU10130.1~933	2423	2258	4681	1723	1792	3515	1270	1844	3129	625	1464	2090
ILL.hemL-BSU28120.1~1293	5046	4948	9989	13129	14276	27405	5384	6650	12022	3374	5490	8864
ILL.hemN-BSU25500.53~1192	1149	1009	2158	2752	3286	6038	954	1829	2811	517	2347	2870
ILL.hemX-BSU28160.1~831	763	743	1506	2202	2547	4749	499	1037	1537	747	1789	2537
ILL.hemY-BSU10140.1~1413	2338	2550	4888	2202	2356	4558	1351	2145	3496	696	1622	2314
ILL.hemZ-BSU09840.2~1507	2442	2509	4951	2266	2625	4891	1925	6371	8298	2634	7735	10373
ILL.hepS-BSU22760.164~919	5173	4299	9472	6126	7581	13707	3994	12043	16039	4584	22446	27047
ILL.hepT-BSU22740.1~1047	5918	5358	11276	7944	8179	16123	5418	12265	17685	3042	14145	17189
ILL.hfq-BSU17340.1~222	239	236	475	524	283	807	301	200	501	105	104	209
ILL.hinT-BSU10030.29~466	1806	1847	3641	1140	744	1884	1742	2078	3778	1606	1226	2798
ILL.hisA-BSU34880.1~738	39	49	88	91	80	171	13	23	37	13	33	47
ILL.hisB-BSU34900.1~585	29	37	66	35	48	83	8	9	17	2	7	9
ILL.hisC-BSU22620.1~1083	3911	3724	7635	7612	7700	15312	3283	3136	6423	2400	2714	5117
ILL.hisD-BSU34910.1~1284	31	36	67	83	93	176	7	8	15	5	18	23
ILL.hisF-BSU34870.1~759	48	41	89	76	63	139	23	22	45	7	21	28
ILL.hisG-BSU34920.1~642	24	16	40	33	35	68	9	9	18	0	8	9
ILL.hisH-BSU34890.1~639	17	23	40	48	61	109	10	6	16	3	10	13
ILL.hisI-BSU34860.1~630	45	61	106	92	84	176	23	22	47	18	26	45
ILL.hisJ-BSU29620.197~1003	1163	835	1998	3032	2610	5642	516	849	1365	536	691	1227
ILL.hisS-BSU27560.90~1364	3609	3159	6766	1115	1710	2825	1812	3140	4963	593	4560	5176
ILL.hisZ-BSU34930.51~1226	37	35	72	36	53	89	9	6	15	7	19	26
ILL.hmp-BSU13040.13~1212	30	20	50	64	72	136	91	128	219	75	98	173
ILL.holA-BSU25560.25~1068	1075	968	2043	1358	1679	3037	923	1272	2199	502	904	1407
ILL.holB-BSU00310.12~1001	3526	2651	6139	5244	5367	10611	2777	6298	9068	2891	17789	20709
ILL.hom-BSU32260.1~1302	1733	2079	3812	22044	18755	40799	604	790	1393	360	478	838
ILL.hpr-BSU09990.41~652	1703	1572	3273	5648	4573	10221	1281	906	2174	2904	1823	4713
ILL.hprK-BSU35000.35~967	2893	2467	5360	3665	2950	6615	2942	2206	5112	2109	1712	3822
ILL.hprP-BSU34970.1~651	2739	2266	5005	3136	2928	6064	1944	2635	4577	1065	1437	2505
ILL.hprT-BSU00680.1~543	4783	4506	9261	3874	3631	7505	2954	4858	7780	1791	4524	6308
ILL.hrcA-BSU25490.1~1032	4090	2769	6858	4560	4289	8849	4828	5247	10165	3831	5721	9645
ILL.hslO-BSU00710.12~887	3650	3120	6770	3050	3344	6394	3380	5116	8496	1228	8742	9970
ILL.hslU-BSU16160.17~1420	10151	8929	19079	14127	15619	29746	7081	12737	19810	2540	8241	10782
ILL.htpG-BSU39820.83~1963	10230	8474	18704	6876	4861	11737	5280	5980	11258	2921	3178	6099
ILL.htrA-BSU12900.43~1392	1063	911	1972	1172	1191	2363	604	871	1480	875	661	1536
ILL.htrB-BSU33000.1~1377	1359	1314	2673	1666	1930	3596	1078	1503	2582	932	1101	2034
ILL.htrC-BSU40360.1~1203	2747	2648	5395	4962	6047	11009	4818	10141	14957	4286	42356	46643
ILL.hutG-BSU39380.1~960	60	50	110	510	479	989	189	199	388	273	129	402
ILL.hutH-BSU39350.1~1527	9	18	27	455	430	885	215	141	351	621	219	840
ILL.hutI-BSU39370.13~1278	83	82	165	669	680	1349	306	262	568	416	183	600
ILL.hutM-BSU39390.1~1428	31	30	61	257	253	510	95	122	212	102	62	164
ILL.hutP-BSU39340.3~458	94	95	188	642	540	1182	954	108	1054	541	82	622
ILL.hutU-BSU39360.1~1659	98	85	183	763	764	1527	348	288	636	658	260	917
ILL.hxlA-BSU03460.8~640	351	300	651	350	299	649	132	219	351	142	104	246
ILL.hxlB-BSU03450.1~558	291	239	527	289	209	498	169	213	384	146	77	224
ILL.hxlR-BSU03470.135~497	171	138	309	75	59	134	108	128	236	38	89	127
ILL.icd-BSU29130.1~1272	22461	24997	47421	48284	45863	94147	14959	12553	27516	10993	10044	21040
ILL.ileS-BSU15430.53~2818	21057	20093	41150	4106	3129	7235	13331	25915	39221	3823	27540	31363
ILL.ilvA-BSU21770.23~1291	717	930	1647	18312	19577	37889	304	224	528	1334	1016	2347
ILL.ilvB-BSU28310.122~1846	129	142	271	2352	2041	4393	29	34	63	19	56	75
ILL.ilvC-BSU28290.24~1052	76	97	173	2296	1689	3985	36	35	71	20	46	66
ILL.ilvD-BSU21870.166~1842	238	390	627	23881	24401	48282	163	113	276	274	121	395
ILL.ilvH-BSU28300.1~519	36	24	58	509	391	900	8	5	13	0	7	7
ILL.immA-BSU04810.1~510	264	172	431	148	216	364	84	180	265	276	310	583
ILL.immR-BSU04820.25~408	395	263	658	223	289	512	273	258	528	550	352	903
ILL.infA-BSU01390.1~219	22184	16262	38445	11794	21828	33622	10109	13851	24009	504	3091	3601
ILL.infB-BSU16630.1~2151	19391	19105	38496	91833	98578	190411	22171	39527	61705	37286	53048	90344
ILL.infC-BSU28870.59~580	35870	29661	65275	16450	24395	40845	16298	38746	54850	18200	64963	83130
ILL.iolB-BSU39750.1~816	217	117	334	293	355	648	238	164	399	315	103	415
ILL.iolC-BSU39740.1~978	256	133	388	315	336	651	281	200	481	268	93	361
ILL.iolD-BSU39730.1~1914	582	335	917	681	856	1537	462	435	899	516	192	708
ILL.iolE-BSU39720.1~894	254	148	402	280	299	579	150	189	342	152	44	197
ILL.iolF-BSU39710.1~1317	430	244	674	351	431	782	210	279	491	166	59	225
ILL.iolG-BSU39700.1~1035	397	216	613	300	366	666	193	250	448	160	53	213
ILL.iolH-BSU39690.1~870	303	207	510	239	232	471	184	191	376	135	35	170
ILL.iolI-BSU39680.86~922	294	190	484	282	325	607	149	196	342	102	43	145
ILL.iolJ-BSU39670.21~893	279	215	494	324	300	624	210	243	452	121	76	196
ILL.iolR-BSU39770.17~772	1232	815	2047	819	1006	1825	921	1106	2025	1988	1419	3411
ILL.iolS-BSU39780.28~960	3039	2477	5513	1909	1894	3803	2413	2843	5326	3831	2541	6377
ILL.iolT-BSU06230.1~1422	71	39	110	47	67	114	181	79	259	475	67	537
ILL.ipi-BSU11130.4~363	550	469	1019	327	327	654	194	467	662	202	439	641
ILL.ipk-BSU00460.22~891	2926	2927	5853	2433	2952	5385	1600	4780	6379	3562	21900	25464
ILL.iscS-BSU27510.1~1140	3402	3604	7005	2950	3497	6447	4412	5008	9428	2139	7139	9288
ILL.iscS-BSU29590.84~1229	1702	1387	3089	1602	1713	3315	952	2069	3021	1060	1399	2459
ILL.iscU-BSU32680.1~444	9550	8221	17749	11581	13185	24766	5914	8669	14546	2992	5335	8332
ILL.iseA-BSU18380.25~570	506	299	805	332	299	631	454	281	735	26	24	50
ILL.ispA-BSU13190.33~992	31	18	49	42	51	93	80	71	151	112	59	171
ILL.ispA-BSU24280.1~891	1346	1504	2849	1955	2463	4418	1149	2548	3693	636	2054	2690
ILL.ispD-BSU00900.15~713	857	917	1774	1655	1657	3312	924	1198	2124	577	1432	2009
ILL.ispF-BSU00910.1~477	303	374	677	816	696	1512	150	330	478	145	871	1017
ILL.ispG-BSU25070.1~1134	5168	5229	10395	6804	5981	12785	4024	5595	9593	2288	2677	4967
ILL.ispH-BSU25160.84~1028	2516	2341	4857	2758	2521	5279	2543	3897	6439	3280	3172	6454
ILL.jag-BSU41030.1~627	12901	13123	26024	4230	4013	8243	5495	17024	22545	3950	19217	23176
ILL.kamA-BSU19690.29~1444	13	11	24	15	24	39	2	8	10	4	38	42
ILL.kapB-BSU31460.1~387	325	303	627	303	204	507	320	326	648	264	329	594
ILL.kapD-BSU31470.15~632	42	42	84	101	114	215	29	37	66	51	89	141
ILL.katA-BSU08820.10~1461	2734	2687	5414	3307	3806	7113	2446	2899	5287	6504	3585	10077
ILL.katE-BSU39050.4~2064	47	29	76	81	64	145	53	54	107	781	179	960
ILL.katX-BSU38630.30~1673	24	22	46	31	28	59	32	30	62	500	111	611
ILL.kbaA-BSU01560.110~706	499	425	924	359	298	657	204	732	936	301	994	1295
ILL.kbl-BSU17000.1~1179	1478	802	2271	445	418	863	2840	1798	4624	5790	1542	7313
ILL.kdgA-BSU22100.2~592	115	94	209	126	177	303	178	141	322	51	400	471
ILL.kdgK-BSU22110.1~975	280	254	534	435	544	979	302	383	685	73	1158	1233
ILL.kdgR-BSU22120.34~1053	416	323	739	538	701	1239	301	460	761	56	1659	1716
ILL.kdgT-BSU22090.1~993	271	219	490	268	337	605	379	349	731	151	696	849
ILL.kduD-BSU22140.2~766	316	366	682	714	714	1428	391	322	714	70	81	151
ILL.kduI-BSU22130.51~878	471	507	978	888	952	1840	562	474	1034	100	145	245
ILL.khtS-BSU09870.5~343	225	119	344	78	94	172	253	162	411	177	207	384
ILL.khtT-BSU09860.11~508	197	113	310	87	44	131	150	122	272	129	230	359
ILL.kinA-BSU13990.51~1871	219	233	452	518	391	909	175	129	304	39	83	122
ILL.kinB-BSU31450.14~1300	250	235	485	482	380	862	131	174	305	423	593	1016
ILL.kinC-BSU14490.13~1299	1767	1421	3188	2213	2437	4650	1519	2116	3630	592	1342	1934
ILL.kinD-BSU13660.1~1521	1666	1486	3152	4157	4867	9024	1391	1688	3076	592	970	1559
ILL.kinE-BSU13530.17~2233	95	129	224	659	466	1125	110	540	649	194	961	1155
ILL.kipA-BSU04090.3~1010	345	369	714	1864	1827	3691	224	189	410	223	185	408
ILL.kipI-BSU04080.1~723	196	187	379	1422	1191	2613	137	130	267	207	141	337
ILL.kipR-BSU04100.8~760	274	257	531	1233	1304	2537	175	163	337	161	144	305
ILL.ksgA-BSU00420.1~879	2898	2963	5857	4143	3966	8109	1381	4941	6319	1767	10548	12319
ILL.ktrA-BSU31090.73~741	396	307	703	342	383	725	137	596	733	600	1243	1843
ILL.ktrB-BSU31100.7~1344	766	656	1422	697	732	1429	326	1169	1507	1046	2366	3426
ILL.ktrC-BSU14510.1~666	2088	1855	3943	3219	3380	6599	1273	2018	3292	1309	1564	2872
ILL.ktrD-BSU13500.17~1366	2053	2053	4106	2894	2552	5446	1070	3169	4240	2276	5714	7990
ILL.lcfA-BSU28560.27~1709	936	754	1690	973	1003	1976	1662	2376	4024	3210	2896	6106
ILL.lctP-BSU03060.1~1626	260	229	489	499	422	921	9060	295	9331	353	177	529
ILL.ldh-BSU03050.54~1019	240	154	394	272	276	548	6853	228	7080	245	128	373
ILL.lepA-BSU25510.24~1862	10662	10466	21128	8886	9306	18192	7858	11444	19308	2478	7424	9912
ILL.leuA-BSU28280.1~1557	105	100	205	1560	1136	2696	11	19	31	8	29	37
ILL.leuB-BSU28270.1~1098	70	88	158	1113	740	1853	30	16	45	12	22	34
ILL.leuC-BSU28260.50~1468	156	186	342	2052	1564	3616	61	83	144	15	40	55
ILL.leuD-BSU28250.1~600	52	55	107	597	401	998	12	27	39	21	13	35
ILL.leuS-BSU30320.110~2524	16322	13064	29383	9333	9223	18556	13147	16831	29968	2282	3461	5743
ILL.levB-BSU34460.1~1551	11	24	35	50	71	121	98	210	309	190	2200	2390
ILL.levD-BSU27070.11~451	16	24	40	46	26	72	106	11	117	36	46	82
ILL.levE-BSU27060.1~489	13	28	41	47	40	87	103	20	124	40	58	99
ILL.levF-BSU27050.12~821	24	27	51	61	47	108	121	32	154	67	74	141
ILL.levG-BSU27040.21~848	33	35	68	77	71	148	92	29	121	51	105	156
ILL.levR-BSU27080.203~3010	291	272	563	530	709	1239	266	396	662	654	915	1569
ILL.lexA-BSU17850.18~635	3630	3292	6919	5347	5127	10474	4322	5279	9587	11960	6402	18352
ILL.lgt-BSU34990.14~823	2832	2426	5167	3308	3369	6677	2462	2231	4611	1258	1472	2715
ILL.liaF-BSU33100.34~759	579	491	1070	721	766	1487	482	733	1213	990	5432	6422
ILL.liaG-BSU33110.61~933	785	684	1469	951	1198	2149	864	1080	1944	1651	9188	10840
ILL.liaH-BSU33120.27~704	373	374	747	235	242	477	359	465	825	7936	25413	33372
ILL.liaI-BSU33130.9~389	131	115	246	99	93	192	129	149	286	3207	8415	12029
ILL.liaR-BSU33080.1~636	392	384	776	560	580	1140	330	530	858	361	1990	2351
ILL.liaS-BSU33090.1~1083	827	784	1611	1150	1155	2305	741	1018	1757	1172	5307	6480
ILL.licA-BSU38570.1~333	94	52	145	17	29	46	141	50	191	344	42	383
ILL.licB-BSU38590.126~434	76	35	111	31	49	80	195	60	257	452	79	531
ILL.licC-BSU38580.1~1359	322	112	434	149	139	288	678	272	951	1662	194	1856
ILL.licH-BSU38560.1~1329	614	273	886	233	237	470	647	457	1100	2174	232	2403
ILL.licR-BSU38600.63~1988	929	726	1655	1148	825	1973	294	629	922	1586	1265	2851
ILL.licT-BSU39080.1~834	743	548	1291	1467	1439	2906	998	956	1952	1070	678	1749
ILL.ligA-BSU06620.24~2030	4990	4507	9497	4327	4955	9282	2839	3456	6308	641	2408	3049
ILL.ligB-BSU20500.59~871	12	10	22	42	41	83	1	25	27	40	74	114
ILL.ligD-BSU13400.4~1839	133	123	256	1230	1191	2421	59	109	168	37	87	124
ILL.lipA-BSU32330.39~935	6766	7373	14115	10877	10805	21682	4434	4635	9102	4380	3933	8351
ILL.lipC-BSU04110.64~705	319	218	533	1065	973	2038	116	162	279	135	127	265
ILL.lmrA-BSU02680.26~592	508	616	1107	539	638	1177	490	1423	1925	381	1417	1808
ILL.lmrB-BSU02670.40~1479	1353	1578	2930	1261	1342	2603	813	3210	4025	242	1565	1808
ILL.lonA-BSU28200.88~2412	7839	6895	14733	9788	7870	17658	4324	6143	10461	5658	10183	15845
ILL.lonB-BSU28210.1~1659	64	69	133	782	791	1573	688	1427	2132	1282	4519	5884
ILL.lpdV-BSU24060.1~1425	2840	2151	4991	1583	1288	2871	4244	2995	7228	1164	1159	2323
ILL.lplA-BSU07100.1~1509	46	29	75	27	36	63	67	51	118	114	67	181
ILL.lplB-BSU07110.1~957	26	24	50	15	26	41	40	22	62	16	15	31
ILL.lplC-BSU07120.1~888	34	20	54	51	52	103	35	27	62	27	40	67
ILL.lplD-BSU07130.9~1349	75	71	146	115	103	218	44	73	117	40	66	106
ILL.lrgB-BSU38330.1~678	963	1978	2941	1151	1191	2342	408	1819	2228	47	134	181
ILL.lrpA-BSU05050.5~415	395	339	731	121	260	381	134	456	594	154	291	448
ILL.lrpB-BSU05060.52~501	92	91	183	49	92	141	29	133	162	32	123	155
ILL.lrpC-BSU04250.12~446	284	207	491	463	461	924	151	231	381	113	1138	1251
ILL.lspA-BSU15450.21~485	1525	1530	3055	1113	1106	2219	939	1977	2914	790	2398	3188
ILL.ltaSA-BSU07260.268~2187	16815	14537	31352	11059	11952	23011	9806	17520	27381	4919	18559	23487
ILL.luxS-BSU30670.2~475	2393	1545	3938	3713	3038	6751	1496	1810	3303	458	883	1341
ILL.lysA-BSU23380.1~1320	3332	3708	7027	13607	13351	26958	1583	3013	4595	1799	3076	4877
ILL.lysC-BSU28470.126~1352	1176	1364	2540	1060	1368	2428	530	1282	1807	986	7127	8113
ILL.lysP-BSU33330.104~1513	1884	2168	4052	6286	6190	12476	585	4837	5422	3869	15966	19836
ILL.lysS-BSU00820.1~1500	12342	10745	23086	19185	20132	39317	8521	15554	24076	4097	13496	17596
ILL.lytA-BSU35640.21~329	1021	834	1850	3554	3431	6985	675	723	1426	377	328	709
ILL.lytB-BSU35630.1~2118	5296	4602	9898	24261	24159	48420	3078	4269	7349	1713	1772	3484
ILL.lytC-BSU35620.39~1529	4126	4039	8129	22614	22798	45412	2538	3533	6083	1282	1206	2498
ILL.lytD-BSU35780.44~2686	7138	6441	13579	26243	26187	52430	2291	3366	5656	1096	1583	2678
ILL.lytE-BSU09420.1~1005	1410	1386	2790	2706	2944	5650	1461	1719	3164	463	636	1099
ILL.lytF-BSU09370.153~1619	6164	6670	12833	26116	30319	56435	1599	2623	4228	326	1473	1809
ILL.lytG-BSU31120.21~869	2034	1754	3788	2047	2094	4141	1149	2964	4117	2389	7432	9822
ILL.lytH-BSU32340.166~1146	105	124	229	61	70	131	89	114	203	64	73	137
ILL.lytR-BSU35650.39~959	3468	3306	6772	2759	3324	6083	2353	3698	6045	475	572	1047
ILL.lytS-BSU28930.82~1863	829	842	1671	1885	1979	3864	684	634	1320	541	1115	1657
ILL.lytT-BSU28920.1~726	580	515	1095	807	938	1745	285	341	624	147	363	510
ILL.maa-BSU40850.1~555	75	69	144	149	142	291	158	270	435	324	1286	1616
ILL.maeN-BSU31580.154~1500	1383	910	2293	1988	1773	3761	971	1621	2592	340	243	583
ILL.maf-BSU28050.26~595	1482	1365	2847	715	929	1644	751	1556	2308	1261	4674	5937
ILL.malA-BSU08180.1~1350	515	464	979	520	498	1018	397	367	763	1391	211	1603
ILL.malL-BSU34560.1~1686	206	157	363	305	312	617	149	172	320	98	212	310
ILL.malP-BSU08200.1~1584	222	145	367	142	132	274	439	280	719	728	146	874
ILL.malQ-BSU08210.1~1722	353	296	649	211	183	394	275	331	604	346	276	622
ILL.malR-BSU08190.11~775	202	125	327	172	177	349	170	135	304	316	98	414
ILL.malS-BSU29880.82~1782	2305	2281	4581	5445	5041	10486	2275	2720	5020	2703	9176	11968
ILL.manA-BSU12020.1~948	7549	2648	10196	174	147	321	492	2183	2705	2278	5337	7643
ILL.manP-BSU12010.1~1953	11987	4290	16277	360	279	639	756	3369	4123	3535	10547	14084
ILL.manR-BSU12000.1~1947	3141	1621	4762	328	276	604	1000	2917	3919	2045	9354	11401
ILL.mapA-BSU01380.1~747	78614	67063	145587	53775	93970	147745	48611	53613	101454	2126	12159	14328
ILL.mbl-BSU36410.10~1011	16312	17847	34151	9227	9465	18692	15029	20957	36176	4439	7939	12411
ILL.mccA-BSU27260.58~981	644	321	965	315	328	643	276	286	562	143	252	395
ILL.mcpA-BSU31240.1~1986	5926	6269	12195	36432	41541	77973	2078	2085	4166	104	103	206
ILL.mcpB-BSU31260.1~1989	3741	4170	7911	31130	31416	62546	678	1125	1803	179	199	378
ILL.mcpC-BSU13950.3~1970	3573	3806	7379	30553	29078	59631	1188	1177	2364	181	543	726
ILL.mcsA-BSU00840.14~571	991	598	1589	727	811	1538	310	2102	2411	515	3552	4070
ILL.mcsB-BSU00850.1~1092	2767	1831	4596	2495	2635	5130	1421	5549	6968	1590	12190	13783
ILL.mdh-BSU29120.44~982	18724	19842	38535	41046	36431	77477	12028	9898	21905	9306	7702	17007
ILL.mdr-BSU03070.7~1545	3766	4034	7799	3496	3896	7392	3160	7816	10980	1070	4042	5112
ILL.mdxD-BSU34620.1~1770	87	57	144	279	290	569	99	130	229	615	1283	1898
ILL.mdxE-BSU34610.1~1254	129	68	197	195	188	383	118	127	243	336	573	908
ILL.mdxF-BSU34600.1~1308	116	66	182	143	164	307	100	101	201	169	345	514
ILL.mdxG-BSU34590.1~837	60	30	90	82	82	164	47	55	102	78	148	226
ILL.mdxR-BSU34630.1~951	9	4	13	146	142	288	33	46	79	406	989	1395
ILL.mecA-BSU11520.28~684	2960	2494	5454	4096	3050	7146	2627	3176	5810	6490	4716	11199
ILL.med-BSU11300.33~986	3864	3214	7078	3502	3389	6891	3167	4697	7867	3953	5530	9483
ILL.melA-BSU30300.1~1299	283	200	483	347	377	724	229	371	600	1713	398	2105
ILL.menA-BSU38490.73~1008	2893	3017	5909	2371	2827	5198	4244	4325	8550	922	1325	2246
ILL.menB-BSU30800.35~850	9670	8569	18239	6996	6735	13731	7077	9263	16373	4356	6871	11237
ILL.menC-BSU30780.1~1116	1069	898	1967	4076	4105	8181	1903	2385	4289	2024	4066	6092
ILL.menD-BSU30820.1~1743	2556	2562	5117	2489	2855	5344	1909	2785	4702	776	2452	3245
ILL.menE-BSU30790.91~1551	1816	1315	3129	6079	6026	12105	2908	3546	6492	3534	8100	11651
ILL.menF-BSU30830.82~1497	4174	3740	7914	3417	3585	7002	3626	4073	7696	1731	3180	4911
ILL.metA-BSU21910.73~978	1402	990	2392	2498	2196	4694	629	903	1532	670	795	1465
ILL.metE-BSU13180.67~2355	203	277	477	8666	5281	13947	172	188	360	4122	8839	12976
ILL.metK-BSU30550.168~1370	19713	18561	38273	8639	9738	18377	16309	32828	49133	8604	16466	25069
ILL.metN-BSU32730.1~825	8680	7814	16492	4808	6198	11006	2661	6314	8970	1206	7072	8281
ILL.metP-BSU32740.1~669	2752	2379	5131	1596	2028	3624	638	2076	2715	433	2423	2856
ILL.metQ-BSU32750.106~1131	3922	3469	7391	2204	2364	4568	1043	2979	4027	908	4181	5091
ILL.metS-BSU00380.90~2084	10482	8469	18951	8901	8131	17032	8640	10701	19340	4996	20420	25417
ILL.mfd-BSU00550.70~3603	7773	7021	14792	13347	13495	26842	8444	15390	23928	4725	13391	18138
ILL.mgsA-BSU22480.16~429	542	481	1023	657	474	1131	547	571	1115	353	475	828
ILL.mgsR-BSU24770.18~398	10	17	27	51	50	101	71	37	107	69	149	220
ILL.mgtE-BSU13300.297~1652	5082	4166	9236	11809	7263	19072	7023	9864	16951	9423	10223	19663
ILL.mhqA-BSU12870.16~966	166	143	309	218	238	456	350	391	742	194	225	419
ILL.mhqR-BSU13670.51~488	2240	2217	4457	925	964	1889	868	2255	3130	857	1662	2519
ILL.miaA-BSU17330.7~951	1066	965	2031	1214	1162	2376	1003	1285	2286	602	780	1384
ILL.minC-BSU28000.1~681	6520	5259	11762	5185	6584	11769	1959	5807	7811	745	3672	4427
ILL.minD-BSU27990.2~808	6803	5898	12699	6952	6718	13670	3468	6350	9801	1098	3669	4762
ILL.minJ-BSU35220.21~1214	3294	3705	6993	7535	6945	14480	3297	3393	6854	1809	3434	5329
ILL.mleA-BSU23550.16~1335	27745	22114	49781	3915	3193	7108	15641	22482	38036	9092	6892	15969
ILL.mleN-BSU23560.40~1446	23062	16556	39617	2619	2434	5053	11090	18763	29870	7850	6865	14715
ILL.mlpA-BSU16710.9~1238	2687	2740	5427	20183	20353	40536	10337	26162	36537	9932	36291	46265
ILL.mmgA-BSU24170.1~1182	3	2	5	60	41	101	16	15	31	85	141	227
ILL.mmgB-BSU24160.1~864	7	4	11	40	46	86	14	25	40	49	113	162
ILL.mmgC-BSU24150.1~1140	7	6	13	52	43	95	15	7	22	43	110	153
ILL.mmgD-BSU24140.1~1119	13	11	24	41	71	112	15	18	33	36	80	116
ILL.mmr-BSU37570.1~1401	5609	2959	8568	5210	3523	8733	2576	3134	5714	958	1453	2411
ILL.mmsA-BSU39760.173~1636	570	353	922	843	763	1606	866	381	1243	1160	373	1533
ILL.mmuM-BSU02410.6~953	156	252	408	1576	1321	2897	34	87	122	214	115	329
ILL.mnaA-BSU35660.20~1162	2065	1957	4022	1532	1499	3031	1296	2054	3346	1044	1178	2221
ILL.mnmA-BSU27500.29~1144	4248	4684	8912	3419	4570	7989	5074	5871	10987	1851	6785	8677
ILL.mntA-BSU30770.135~1055	735	1150	1885	1208	2073	3281	3119	1366	4479	120	1485	1605
ILL.mntB-BSU30760.1~753	385	577	962	843	1362	2205	1509	690	2174	44	568	612
ILL.mntC-BSU30750.4~1311	708	1003	1711	1441	2365	3806	2672	1088	3756	104	969	1077
ILL.mntD-BSU30740.1~888	605	841	1446	1172	1875	3047	2131	916	3034	70	725	795
ILL.mntH-BSU04360.29~1306	5241	5667	10869	6228	7119	13347	17010	9158	25979	1921	5331	7253
ILL.mntR-BSU24520.1~429	3210	3313	6521	2634	2457	5091	2056	3961	5984	1880	3472	5352
ILL.moaA-BSU36700.16~1041	1710	1455	3165	2162	2085	4247	1602	2020	3629	1418	4919	6339
ILL.moaB-BSU29460.85~597	949	1094	2043	3299	4119	7418	2158	4299	6446	1355	7919	9279
ILL.moaC-BSU05960.1~513	1015	749	1764	725	715	1440	846	971	1815	475	593	1068
ILL.moaD-BSU14310.1~234	224	223	447	243	234	477	192	245	438	68	185	253
ILL.moaE-BSU14300.1~474	547	439	986	545	586	1131	447	535	980	152	552	707
ILL.mobA-BSU14260.11~610	431	405	836	313	331	644	415	539	960	171	736	915
ILL.mobB-BSU14290.1~522	620	505	1125	648	729	1377	511	617	1127	174	646	821
ILL.moeA-BSU14280.18~1310	1299	1223	2522	1591	1489	3080	1417	1467	2883	553	1465	2018
ILL.moeB-BSU14270.1~1020	1013	878	1891	1011	1062	2073	931	1150	2082	424	1249	1674
ILL.motA-BSU13690.22~834	2186	2776	4962	12332	14033	26365	844	1012	1856	21	31	52
ILL.motB-BSU13680.1~786	2798	3451	6247	14735	18545	33280	1033	1210	2232	23	27	50
ILL.mpr-BSU02240.35~976	230	243	473	1521	1403	2924	369	176	546	495	271	766
ILL.mprF-BSU08425.39~2609	4150	3718	7866	3666	4177	7843	3243	4124	7360	1148	2718	3866
ILL.mraW-BSU15140.70~1005	6562	6413	12973	7880	8810	16690	6921	7750	14673	7404	8407	15837
ILL.mraY-BSU15190.112~1086	4925	3964	8888	3880	4686	8566	2529	4168	6698	1046	3539	4588
ILL.mreB-BSU28030.1~1014	10163	9347	19509	9192	9265	18457	4240	10568	14840	3198	9284	12502
ILL.mreBH-BSU14470.31~1038	106	111	217	71	87	158	50	85	135	93	135	228
ILL.mreC-BSU28020.1~873	9282	8029	17311	7399	8485	15884	3263	8847	12110	1867	7435	9303
ILL.mreD-BSU28010.1~519	2739	2374	5111	1847	2770	4617	561	2582	3147	332	1689	2022
ILL.mrgA-BSU32990.1~462	2396	6429	8822	2169	2315	4484	1039	6229	7271	1546	867	2409
ILL.mrnC-BSU00950.4~435	608	478	1086	952	967	1919	335	465	802	127	455	582
ILL.mrpA-BSU31600.59~2464	5036	3456	8492	2642	2484	5126	3329	3796	7124	1890	3686	5575
ILL.mrpB-BSU31610.1~432	663	417	1080	437	437	874	422	462	883	145	356	501
ILL.mrpC-BSU31620.1~342	371	270	641	258	235	493	233	278	514	89	177	265
ILL.mrpD-BSU31630.1~1482	2508	1722	4194	1906	1665	3571	1494	1830	3342	421	973	1402
ILL.mrpE-BSU31640.6~482	803	575	1378	554	457	1011	324	582	892	107	258	363
ILL.mrpF-BSU31650.1~285	394	313	701	265	286	551	198	350	550	51	127	177
ILL.mrpG-BSU31660.1~375	570	429	997	447	374	821	267	492	752	106	171	277
ILL.mscL-BSU36360.1~393	813	713	1526	1242	1203	2445	433	1233	1670	665	1769	2432
ILL.msmE-BSU30270.1~1281	62	30	92	146	101	247	220	94	314	1777	277	2052
ILL.msmR-BSU30260.14~1048	148	72	220	298	204	502	785	209	994	2277	257	2533
ILL.msmX-BSU38810.1~1098	1499	1011	2506	1624	1446	3070	2901	1690	4587	4301	342	4639
ILL.msrA-BSU21690.20~553	582	462	1043	766	638	1404	310	523	825	933	940	1861
ILL.mstX-BSU31321.47~379	1	3	4	11	7	18	5	6	12	3	3	6
ILL.mta-BSU36600.1~774	91	100	191	198	217	415	56	70	126	76	176	252
ILL.mtbP-BSU20250.1~1332	1	0	1	0	6	6	1	5	6	1	6	7
ILL.mtlA-BSU03981.1~1437	328	230	557	207	199	406	254	394	649	258	548	806
ILL.mtlD-BSU03990.2~1123	317	272	589	188	219	407	266	415	681	263	480	743
ILL.mtlF-BSU03982.1~432	117	83	200	65	67	132	83	105	189	71	142	214
ILL.mtlR-BSU04160.186~2270	2016	1463	3479	1694	1572	3266	1947	3716	5665	2651	2619	5269
ILL.mtn-BSU27270.21~716	2871	2988	5858	2435	2260	4695	2381	3061	5589	1291	2012	3304
ILL.mtnA-BSU13550.1~1062	60	81	141	2603	2508	5111	21	30	51	338	1260	1598
ILL.mtnB-BSU13610.1~630	183	258	441	15649	15482	31131	244	405	649	3173	2492	5665
ILL.mtnD-BSU13620.15~551	167	329	496	17739	17070	34809	319	424	748	3788	2516	6307
ILL.mtnK-BSU13560.87~1286	58	55	113	2254	2244	4498	14	28	42	423	1408	1832
ILL.mtnU-BSU13570.1~780	160	203	362	3591	2879	6470	110	83	193	214	109	323
ILL.mtnW-BSU13590.58~1302	285	359	643	19997	17156	37153	340	834	1178	7174	5507	12678
ILL.mtnX-BSU13600.1~708	166	256	422	13409	12792	26201	196	456	652	3055	2905	5959
ILL.mtrB-BSU22770.1~228	1689	1532	3221	4400	5353	9753	2236	4062	6335	5806	14665	20505
ILL.murAA-BSU36760.34~1344	37070	35643	72711	13920	14388	28308	16301	33787	50160	4107	19298	23421
ILL.murAB-BSU37100.379~1668	10470	9257	19717	23504	23359	46863	12806	15089	27885	7171	10487	17639
ILL.murB-BSU15230.32~943	3911	4128	8029	5456	7122	12578	3021	4542	7551	777	3163	3942
ILL.murC-BSU29790.1~1299	12277	11913	24190	10817	12874	23691	8638	14431	23071	3105	8130	11236
ILL.murD-BSU15200.1~1356	8309	6495	14804	7122	8983	16105	5241	6976	12216	1558	5543	7103
ILL.murE-BSU15180.1~1485	8370	7625	15992	6133	6597	12730	5278	8332	13610	3271	8038	11312
ILL.murF-BSU04570.72~1445	4007	3422	7426	7816	8164	15980	5109	8043	13123	2884	5586	8468
ILL.murG-BSU15220.123~1214	3486	3226	6712	4919	6251	11170	2264	3876	6140	524	2865	3390
ILL.murQ-BSU01700.29~943	773	451	1223	496	384	880	792	196	982	579	191	766
ILL.mutL-BSU17050.1~1884	2479	1953	4432	3095	3498	6593	2207	3446	5656	1928	4179	6106
ILL.mutM-BSU29080.23~853	1374	1140	2514	1665	1909	3574	1206	1432	2639	651	841	1492
ILL.mutS-BSU17040.1~2577	2998	2452	5449	3423	3733	7156	2731	4571	7321	2274	6188	8489
ILL.mutSB-BSU28580.1~2358	4862	4244	9106	9327	10759	20086	5331	7317	12653	2795	7947	10743
ILL.mutT-BSU04330.1~450	41	49	90	160	250	410	51	175	224	123	792	919
ILL.nadA-BSU27850.1~1107	23	17	40	128	179	307	89	127	216	13	153	167
ILL.nadB-BSU27870.28~1623	29	27	56	210	240	450	110	199	310	26	297	330
ILL.nadC-BSU27860.1~870	16	17	33	52	74	126	50	76	126	19	89	108
ILL.nadD-BSU25640.12~581	2477	2441	4918	2365	3279	5644	1383	3623	5007	272	1674	1946
ILL.nadE-BSU03130.75~893	5464	6041	11483	4278	3220	7498	7181	7839	15001	3325	3416	6737
ILL.nadR-BSU27890.1~543	860	816	1675	776	737	1513	648	937	1602	854	918	1780
ILL.nagA-BSU35010.14~1204	1284	987	2268	1511	1511	3022	1545	1376	2919	1217	1028	2246
ILL.nagBA-BSU35020.1~729	624	494	1118	919	881	1800	785	752	1538	436	425	862
ILL.nagBB-BSU02360.42~791	1090	820	1910	2690	2884	5574	847	1061	1900	1156	2608	3764
ILL.nagP-BSU02350.21~1916	2947	2250	5195	7715	7999	15714	2503	3039	5540	3023	6335	9357
ILL.nagP-BSU07700.15~1373	2943	2596	5539	3752	3261	7013	4741	4285	9025	4682	2152	6834
ILL.nap-BSU05440.12~914	1693	1647	3340	1320	1093	2413	1112	1760	2870	1063	851	1912
ILL.narG-BSU37280.1~3687	39	22	61	40	31	71	25	26	52	17	58	75
ILL.narH-BSU37270.1~1464	8	16	24	18	16	34	8	20	28	4	21	25
ILL.narI-BSU37250.1~672	14	12	26	18	18	36	8	21	29	7	27	34
ILL.narJ-BSU37260.1~555	6	6	12	7	10	17	5	5	10	3	6	9
ILL.narK-BSU37320.89~1276	49	64	113	124	114	238	57	90	147	76	225	301
ILL.nasA-BSU03330.10~1215	197	183	380	163	192	355	144	194	336	117	175	292
ILL.nasB-BSU03320.23~2338	36	23	59	27	28	55	10	15	25	14	6	20
ILL.nasC-BSU03310.4~2136	16	9	21	21	37	58	11	13	25	8	7	15
ILL.nasD-BSU03300.1~2418	78	66	144	113	108	221	83	59	142	52	43	95
ILL.nasE-BSU03290.1~321	277	262	539	383	470	853	436	300	736	154	181	335
ILL.nasF-BSU03280.1~1452	997	948	1945	2411	2973	5384	808	1069	1881	903	925	1826
ILL.natA-BSU02750.12~752	324	291	613	197	191	388	118	193	310	19	85	106
ILL.natA-BSU09890.11~907	1025	924	1949	376	335	711	925	1204	2131	158	489	648
ILL.natB-BSU02760.1~1161	541	421	962	341	334	675	184	308	494	34	127	161
ILL.natB-BSU09900.1~1260	2017	2096	4113	952	802	1754	2197	2502	4699	488	1035	1524
ILL.natK-BSU02730.1~957	534	499	1033	419	364	783	528	574	1104	153	212	366
ILL.natR-BSU02740.12~713	416	340	756	348	288	636	426	414	851	178	188	367
ILL.ndh-BSU12290.40~1218	31827	28469	60245	27439	33487	60926	29341	37838	67230	5477	15999	21509
ILL.ndhF-BSU01830.1~1518	140	59	199	111	119	230	41	114	156	269	1133	1402
ILL.ndk-BSU22730.1~450	13959	12027	25941	9224	8100	17324	10776	15089	26052	7000	7810	14842
ILL.ndoA-BSU04660.1~351	9117	8034	17150	6490	6128	12618	4824	7454	12317	4197	5630	9837
ILL.nfrA-BSU38110.4~753	1823	1608	3431	503	425	928	1202	1627	2832	896	1245	2147
ILL.nhaC-BSU09680.127~1488	1706	1739	3445	470	540	1010	1594	3118	4712	728	2883	3611
ILL.nhaK-BSU33420.208~2220	1120	1175	2295	918	812	1730	1173	1420	2593	511	2320	2831
ILL.nhaX-BSU09690.21~521	0	4	4	8	4	12	19	10	27	543	18	540
ILL.nifS-BSU27880.25~1212	257	228	485	193	235	428	226	330	556	226	291	517
ILL.nin-BSU03420.2~400	973	879	1850	1012	873	1885	758	851	1651	293	418	706
ILL.noc-BSU40990.10~861	5081	4587	9662	4697	5463	10160	3353	5331	8661	775	2402	3173
ILL.nosA-BSU07630.16~1107	657	714	1370	976	1101	2077	317	638	959	219	404	625
ILL.nprB-BSU11100.19~1635	103	75	178	82	64	146	54	111	165	81	139	220
ILL.nprE-BSU14700.13~1578	879	593	1472	419	319	738	542	492	1032	668	916	1583
ILL.nrdE-BSU17380.1~2103	8373	7459	15830	11595	14531	26126	3571	10986	14557	1707	10058	11766
ILL.nrdEB-BSU20060.1~3507	55.4086	34.3373	89.6744	53.1222	62.1199	115.25	20.9986	49.1911	72.2522	22.1134	43.6581	65.7905
ILL.nrdF-BSU17390.18~1007	4792.49	4873.38	9664.91	6531.02	8895.2	15426.2	2857.14	6483.33	9335.46	764.895	4745.31	5513.03
ILL.nrdF-BSU20040.1~1798	48.1031	23.8395	73.3492	24.8598	29.4984	54.5699	14.8575	46.4746	61.2859	14.992	31.3014	47.18
ILL.nrdI-BSU17370.9~401	1279	1087	2365	1652	1929	3581	398	1633	2033	318	1618	1938
ILL.nrdI-BSU20070.1~390	0	0	0	0	1	1	1	0	1	0	1	1
ILL.nrdR-BSU29000.162~620	1223	1134	2350	2350	1825	4175	1209	1704	2911	3554	3285	6758
ILL.nrnA-BSU29250.1~942	2812	2712	5524	4835	3802	8637	2336	3830	6132	1390	1872	3262
ILL.nsrR-BSU09380.16~456	768	849	1617	966	1071	2037	570	791	1361	326	397	723
ILL.ntdA-BSU10550.104~1429	46	26	72	41	57	98	4	31	35	17	43	60
ILL.ntdB-BSU10540.1~849	41	43	84	59	61	120	10	27	37	13	35	48
ILL.ntdC-BSU10530.1~1053	93	79	172	123	130	253	30	76	106	45	79	124
ILL.nth-BSU22340.1~660	1564	1531	3095	10939	10042	20981	1931	3103	5039	2873	5705	8590
ILL.nucA-BSU03430.28~471	1510	1437	2946	1317	1163	2480	1032	1290	2306	334	637	971
ILL.nucB-BSU25750.1~411	28	16	44	21	27	48	8	40	48	28	64	94
ILL.nudF-BSU23610.28~585	690	665	1355	1101	1086	2187	1071	822	1877	1233	1450	2687
ILL.nupC-BSU39410.75~1256	5365	3561	8926	3599	3443	7042	5142	6165	11309	3869	3204	7072
ILL.nusA-BSU16600.35~1150	91647	92107	183754	990	1042	2032	86890	134418	221305	809	703	1512
ILL.nusB-BSU24320.260~655	4646	4135	8780	4449	5162	9611	3035	6261	9291	1743	3058	4805
ILL.nusG-BSU01010.171~704	7018	6967	13985	11950	12469	24419	2238	6267	8505	1300	2385	3686
ILL.oatA-BSU27140.86~1990	253	188	441	259	282	541	146	224	370	119	390	509
ILL.obgE-BSU27920.34~1320	4431	5190	9621	7196	10332	17528	9864	15568	25470	4035	17897	21954
ILL.odhB-BSU19360.16~1269	51201	38300	89311	61753	56117	117870	37392	43460	81434	23692	11526	35194
ILL.ogt-BSU13540.1~498	371	437	808	738	646	1384	427	648	1068	540	680	1214
ILL.ohrA-BSU13140.6~431	265	313	578	640	640	1280	368	512	881	264	1168	1433
ILL.ohrB-BSU13160.59~469	16	26	42	73	75	148	47	47	94	1110	259	1368
ILL.ohrR-BSU13150.16~459	332	306	637	240	255	495	390	439	828	307	422	732
ILL.oppA-BSU11430.137~1774	4585	5145	9730	14705	12219	26924	1654	980	2635	3644	621	4262
ILL.oppB-BSU11440.108~1043	570	549	1119	1810	1102	2912	180	111	291	357	79	436
ILL.oppC-BSU11450.1~918	616	637	1253	1973	1216	3189	154	126	282	267	89	355
ILL.oppD-BSU11460.5~1081	879	858	1737	2977	1757	4734	170	152	322	362	118	480
ILL.oppF-BSU11470.2~919	911	879	1790	3018	2074	5092	133	172	305	371	140	512
ILL.opuAA-BSU02980.22~1278	2356	3644	6000	7201	6523	13724	267	1430	1698	1652	8809	10464
ILL.opuAB-BSU02990.2~850	1814	2234	4034	5215	5100	10315	292	1042	1347	1199	5847	7148
ILL.opuAC-BSU03000.1~882	2719	3316	6030	8580	7772	16352	539	1436	1972	1611	7388	9000
ILL.opuBA-BSU33730.53~1198	88	120	205	295	292	587	12	99	115	46	274	325
ILL.opuBB-BSU33720.10~663	47	51	98	163	118	281	10	39	49	27	81	108
ILL.opuBC-BSU33710.1~921	87	103	190	283	225	508	23	105	128	26	200	226
ILL.opuBD-BSU33700.11~691	89	92	181	230	172	402	31	70	101	30	160	190
ILL.opuCA-BSU33830.29~1171	555	565	1117	3395	4000	7395	301	412	713	1511	1833	3341
ILL.opuCB-BSU33820.23~676	201	268	469	1913	2179	4092	175	236	406	482	625	1105
ILL.opuCC-BSU33810.1~912	351	377	728	2698	3290	5988	219	308	527	450	810	1260
ILL.opuCD-BSU33800.18~707	300	369	669	2635	2988	5623	233	303	536	494	637	1131
ILL.opuD-BSU30070.1~1539	2110	1873	3982	2212	2153	4365	1733	2616	4350	815	2506	3322
ILL.opuE-BSU06660.109~1587	262	405	667	1081	1147	2228	70	413	484	75	1384	1462
ILL.oxdC-BSU33240.13~1170	66	62	128	99	66	165	80	71	151	35	45	80
ILL.pabA-BSU00750.14~598	1055	862	1915	1575	1508	3083	982	850	1823	379	1679	2058
ILL.pabB-BSU00740.79~1491	1451	1059	2510	2263	2072	4335	1202	1256	2461	958	5872	6841
ILL.pabC-BSU00760.1~882	1119	887	2005	2278	2128	4406	1036	1156	2192	477	2286	2774
ILL.padC-BSU34400.23~508	60	69	129	79	74	153	34	35	69	39	49	88
ILL.padR-BSU08340.61~609	956	843	1799	1214	987	2201	659	979	1624	592	545	1137
ILL.paiA-BSU32150.128~646	107	102	209	108	160	268	461	1100	1557	3038	6262	9285
ILL.paiB-BSU32140.1~624	236	211	447	208	230	438	726	1493	2220	3662	7505	11173
ILL.panB-BSU22430.120~953	6138	5824	11950	8254	9612	17866	6219	7573	13833	2368	4662	7051
ILL.panC-BSU22420.1~861	5610	5505	11059	8022	9008	17030	5955	6851	12851	1682	3934	5644
ILL.panD-BSU22410.2~385	2008	1978	3960	3039	3360	6399	2500	2705	5108	896	1666	2542
ILL.parA-BSU40970.30~791	2875	2502	5377	2750	2418	5168	3342	2308	5653	1156	1163	2320
ILL.parB-BSU40960.1~849	3615	3324	6932	2882	2899	5781	2959	2862	5912	942	1285	2255
ILL.parC-BSU18100.4~2424	6108	4941	11049	11155	10888	22043	3668	6286	9954	2442	4860	7305
ILL.parE-BSU18090.264~2231	4274	3605	7879	7045	6275	13320	2448	4176	6624	2171	4077	6248
ILL.patA-BSU14000.1~1182	5411	5035	10445	11961	11263	23224	3790	6499	10268	5387	19359	24749
ILL.patB-BSU31440.57~1220	2279	2146	4424	1034	755	1789	2013	2591	4600	678	942	1618
ILL.pbpA-BSU25000.40~2190	8937	8470	17407	8542	9440	17982	6770	13669	20440	5786	12994	18780
ILL.pbpB-BSU15160.1~2151	7806	6823	14625	20513	24013	44526	4437	11235	15678	10546	11899	22424
ILL.pbpC-BSU04140.151~2157	11770	11377	23146	7669	9207	16876	5859	9689	15558	1103	3516	4623
ILL.pbpD-BSU31490.1~1875	5129	4751	9880	5867	6367	12234	4039	6049	10087	2074	2685	4759
ILL.pbpE-BSU34440.6~1361	963	929	1892	1283	1468	2751	177	63	240	39	53	92
ILL.pbpF-BSU10110.1~2145	868	776	1644	647	780	1427	450	731	1181	201	741	942
ILL.pbpG-BSU37510.1~2076	36	31	67	26	26	52	21	21	41	17	27	44
ILL.pbpH-BSU13980.87~2144	2842	2100	4942	2764	3024	5788	1106	1709	2815	113	297	410
ILL.pbpI-BSU27310.40~1794	372	362	734	597	755	1352	193	509	702	155	2377	2532
ILL.pbpX-BSU16950.28~1203	4023	3202	7224	3657	3563	7220	1051	3392	4443	4503	10597	15100
ILL.pbuE-BSU05800.1~1167	3018	3017	6035	461	561	1022	6477	5636	12113	399	2719	3118
ILL.pbuG-BSU06370.135~1457	6092	6308	12397	4084	2524	6608	4687	13788	18497	654	4311	4970
ILL.pbuO-BSU29990.88~1386	2781	2841	5622	724	760	1484	1151	3864	5016	57	223	280
ILL.pbuX-BSU22060.1~1317	873	801	1674	125	122	247	724	2079	2802	210	597	807
ILL.pckA-BSU30560.27~1610	2437	2463	4897	1680	2113	3793	1469	3533	4999	73313	431	73676
ILL.pcp-BSU02650.1~648	192	176	367	217	170	387	189	153	340	167	181	348
ILL.pcrA-BSU06610.1~2220	3727	2950	6677	3251	3444	6695	2036	2269	4304	724	2182	2906
ILL.pcrB-BSU06600.23~709	745	800	1543	804	792	1596	498	564	1074	218	486	708
ILL.pdaA-BSU07980.31~822	208	213	421	420	385	805	206	615	822	497	1026	1523
ILL.pdeH-BSU31740.26~1255	2446	2071	4517	2888	2535	5423	2336	2772	5117	1695	1995	3698
ILL.pdhA-BSU14580.208~1323	74237	62977	137164	42390	46452	88842	41388	66179	107428	11306	21636	32925
ILL.pdhB-BSU14590.1~978	45464	37799	83238	33069	32040	65109	30650	40186	70605	9429	13349	22758
ILL.pdhC-BSU14600.1~1329	70654	62396	133014	63222	66518	129740	46008	64685	110442	15049	24369	39402
ILL.pdhD-BSU14610.1~1413	65012	61892	126832	65562	60542	126104	49602	58352	107741	13869	16555	30403
ILL.pdp-BSU39400.30~1331	6944	5134	12078	4951	5039	9990	7209	8555	15759	5840	3886	9725
ILL.pel-BSU07560.41~1303	6176	6281	12457	485	641	1126	4648	5613	10244	1509	1920	3426
ILL.pelB-BSU18650.1~1038	25	21	46	37	52	89	17	38	55	38	80	118
ILL.pelC-BSU34950.141~806	267	239	506	378	380	758	391	573	964	364	337	701
ILL.penP-BSU18800.1~921	2379	1891	4228	3206	2439	5645	800	1436	2242	1379	1367	2716
ILL.pepF-BSU11540.1~2013	4079	3889	7968	2876	2541	5417	2367	3170	5537	2293	3101	5394
ILL.pepT-BSU38920.1~1233	2961	2505	5465	1587	1185	2772	1742	1896	3624	2561	1425	3985
ILL.perR-BSU08730.1~438	3728	3884	7612	4219	4404	8623	5182	5172	10385	7894	4372	12272
ILL.pfkA-BSU29190.184~1143	18002	16271	34273	9413	9970	19383	18214	26152	44356	4542	11386	15928
ILL.pgcA-BSU09310.1~1746	8145	7740	15885	7099	6180	13279	5832	8196	14028	7732	12130	19861
ILL.pgcM-BSU34550.1~681	138	71	209	127	148	275	86	105	191	48	99	147
ILL.pgdS-BSU35860.14~1255	3957	4290	8247	22206	20888	43094	838	955	1792	106	102	208
ILL.pgi-BSU31350.11~1363	28259	23130	51367	18458	12073	30531	16838	18933	35478	16106	37760	53778
ILL.pgk-BSU33930.317~1501	40453	32804	73226	28391	21192	49583	41413	49511	90938	3633	10710	14345
ILL.pgm-BSU33910.1~1536	38820	32618	71435	27575	20532	48107	45626	45880	91606	2607	8901	11509
ILL.pgsA-BSU16920.50~631	1536	1385	2919	4411	4553	8964	1408	1990	3436	1427	2611	4045
ILL.pgsA-BSU35880.19~1161	131	104	235	128	154	282	80	126	207	59	97	156
ILL.pgsB-BSU35900.74~1255	104	69	173	91	85	176	52	64	116	90	60	150
ILL.pgsC-BSU35890.15~464	21	22	43	37	27	64	14	28	43	14	16	30
ILL.pgsE-BSU35870.1~168	34	6	40	23	28	51	16	19	37	22	10	32
ILL.pheA-BSU27900.1~858	1251	1392	2643	3309	3738	7047	2151	2351	4491	777	1978	2755
ILL.pheB-BSU27910.51~494	864	912	1774	2036	2732	4768	986	1615	2586	553	1568	2120
ILL.pheS-BSU28640.298~1332	4930	4094	8986	2647	2406	5053	4015	6033	9986	1901	5720	7606
ILL.pheT-BSU28630.1~2415	7833	6778	14611	2259	2440	4699	7626	9172	16814	2257	7678	9947
ILL.phoA-BSU09410.106~1491	246	201	447	684	611	1295	102	269	371	257	493	750
ILL.phoB-BSU05740.264~1652	134	116	250	92	112	204	44	100	144	57	112	169
ILL.phoD-BSU02620.19~1770	27	31	58	80	92	172	60	73	133	94	255	349
ILL.phoE-BSU10340.11~592	790	747	1537	704	630	1334	480	737	1206	901	672	1574
ILL.phoH-BSU25340.1~960	7819	6522	14340	5900	5152	11052	3741	5678	9432	5717	6902	12652
ILL.phoP-BSU29110.57~779	1031	691	1719	1455	1394	2849	1077	724	1784	1877	381	2246
ILL.phoR-BSU29100.1~1740	2811	2434	5245	4291	4013	8304	2365	2463	4834	5043	981	6025
ILL.phrA-BSU12440.1~135	18	26	43	60	28	88	45	7	67	459	15	431
ILL.phrC-BSU03780.1~123	57	76	127	109	29	138	198	52	205	156	59	205
ILL.phrE-BSU25840.1~135	37	40	77	53	41	94	72	40	109	16	6	22
ILL.phrF-BSU37470.1~120	147	146	293	261	123	384	246	62	308	193	44	237
ILL.phrG-BSU40310.1~117	0	1	1	0	0	0	1	0	0	0	0	0
ILL.phrH-BSU06839.1~174	50	44	94	119	56	175	11	45	56	53	67	119
ILL.phrI-BSU05020.1~120	17	14	31	31	28	59	9	2	7	3	4	7
ILL.phrK-BSU18920.1~123	10	13	23	54	17	71	22	9	24	5	0	5
ILL.phy-BSU19800.6~1154	15	21	36	20	27	47	16	33	49	18	41	59
ILL.pit-BSU12840.1~1002	13843	12591	26424	9877	10196	20073	7850	17345	25249	2398	5109	7536
ILL.pksA-BSU17080.1~618	408	363	771	679	644	1323	442	630	1072	523	546	1068
ILL.pksB-BSU17090.54~731	117	70	187	294	290	584	48	84	132	121	116	237
ILL.pksC-BSU17100.282~1148	344	250	594	891	721	1612	278	243	522	864	299	1165
ILL.pksD-BSU17110.504~1478	117	107	224	328	286	614	40	104	144	304	222	526
ILL.pksE-BSU17120.1~2304	50	80	130	237	185	422	6	51	57	183	180	362
ILL.pksF-BSU17140.1~1248	3	8	11	51	35	86	1	1	2	12	11	23
ILL.pksG-BSU17150.1~1263	4	4	8	73	20	93	3	4	7	9	9	18
ILL.pksH-BSU17160.1~780	4	7	11	44	13	57	6	4	10	7	8	15
ILL.pksI-BSU17170.1~750	6	3	9	26	15	41	2	3	5	6	5	11
ILL.pksJ-BSU17180.1~15132	197	205	402	923	632	1555	110	87	197	53	155	208
ILL.pksL-BSU17190.1~13617	437	340	777	1418	1199	2617	206	199	405	72	172	244
ILL.pksM-BSU17200.1~12789	598	450	1048	1405	1185	2590	309	362	671	41	185	226
ILL.pksN-BSU17210.14~16480	504	466	970	2675	2219	4894	255	255	510	91	180	271
ILL.pksR-BSU17220.15~7646	498	449	947	1784	1829	3613	217	296	513	76	227	303
ILL.pksS-BSU17230.82~1299	2020	1538	3558	2008	1470	3478	982	1334	2316	1863	1286	3149
ILL.plsC-BSU09540.25~624	2679	3965	6620	1710	2683	4393	1987	4649	6614	1332	1438	2756
ILL.plsX-BSU15890.1~1002	4524	6979	11499	5655	9263	14918	3054	9787	12825	1397	3580	4978
ILL.pnbA-BSU34390.13~1482	491	480	971	350	336	686	455	443	899	171	151	322
ILL.pncA-BSU31760.1~552	1733	1838	3569	3678	3375	7053	1168	1486	2657	1214	968	2190
ILL.pnpA-BSU16690.173~2290	31575	33425	65000	61201	66667	127868	28340	67945	96284	36712	86254	122969
ILL.polA-BSU29090.47~2689	3454	2951	6405	4069	4293	8362	3543	3762	7312	2010	2926	4936
ILL.polC-BSU16580.109~4422	10381	9479	19857	75787	81591	157378	15414	24848	40271	10862	38343	49220
ILL.ponA-BSU22320.1~2745	12677	10670	23347	11098	13740	24838	7170	11866	19024	3700	10055	13754
ILL.ppaC-BSU40550.26~955	18371	15303	33674	19928	17855	37783	14841	19247	34093	5417	7674	13093
ILL.ppiB-BSU23360.39~470	5770	5988	11758	4683	3734	8417	6591	7530	14130	4100	4362	8462
ILL.ppnK-BSU11610.1~801	2244	1761	4002	1503	1074	2577	1455	1354	2775	605	724	1333
ILL.ppnK-BSU29540.58~861	2713	1534	4245	3238	2923	6161	1315	1621	2935	3054	1156	4208
ILL.pps-BSU18830.27~2627	1206	1103	2309	577	657	1234	521	934	1455	3740	17502	21247
ILL.ppsA-BSU18340.84~7769	346.319	386.451	732.501	893.714	689.931	1583.53	122.086	110.566	230.989	960.208	365.956	1324.9
ILL.ppsB-BSU18330.1~7683	299	298	597	815	589	1404	80	88	168	146	179	325
ILL.ppsC-BSU18320.17~7684	380.863	363.101	743.967	897.999	773.351	1671.53	146.867	206.965	355.613	129.477	186.666	318.139
ILL.ppsD-BSU18310.1~10812	656.818	593.448	1250.53	1538.29	1448.72	2986.94	283.047	352.469	635.398	148.315	365.378	512.964
ILL.ppsE-BSU18300.1~3840	265	224	489	620	523	1143	150	156	306	40	127	167
ILL.prfA-BSU37010.25~1095	11027	10766	21791	6545	6131	12676	9401	9970	19640	4395	6331	10927
ILL.prfB-BSU35290.10~1111	9461	8250	17700	9949	12246	22195	6634	10768	17351	2960	4031	6985
ILL.priA-BSU15710.1~2418	2037	1667	3704	12761	12539	25300	3077	4718	7795	4065	7218	11283
ILL.prkA-BSU08970.1~1896	59	44	103	47	55	102	62	103	165	35	278	313
ILL.prkC-BSU15770.1~1947	5915	4451	10366	11634	9665	21299	5398	7650	13052	1141	2844	3985
ILL.prmA-BSU25450.1~936	4214	4381	8595	3150	4203	7353	2254	5826	8112	908	4326	5238
ILL.prmC-BSU37000.1~867	1347	1323	2666	3068	3628	6696	1420	3905	5394	1865	4441	6367
ILL.proA-BSU13130.12~1259	4169	3672	7836	475	681	1156	1382	2080	3465	571	3720	4294
ILL.proB-BSU13120.53~1150	2244	1714	3958	271	348	619	564	1174	1742	257	2493	2752
ILL.proG-BSU12910.10~828	335	375	710	448	451	899	286	371	654	129	200	328
ILL.proH-BSU18480.1~894	674	643	1317	368	228	596	125	443	566	1487	7093	8584
ILL.proI-BSU23800.267~1103	696	733	1429	6659	6678	13337	1568	3415	4983	2169	4813	6983
ILL.proJ-BSU18470.1~1116	954	877	1831	464	350	814	155	664	819	2133	9218	11350
ILL.proS-BSU16570.33~1727	14102	12328	26402	28751	25561	54312	19657	30128	49652	6199	21779	27973
ILL.prpB-BSU24120.18~923	159	129	288	266	245	511	192	176	368	238	214	451
ILL.prpC-BSU15760.1~765	2061	1535	3596	4652	4017	8669	2038	2389	4400	561	1160	1720
ILL.prpD-BSU24130.15~1433	51	42	93	130	129	259	78	105	183	97	180	277
ILL.prs-BSU00510.1~954	12374	10962	23335	6665	6705	13370	6733	9369	16127	1498	6932	8434
ILL.prsA-BSU09950.3~881	15961	13570	29470	12827	12441	25268	9057	16347	25353	10048	15050	25069
ILL.prsW-BSU22940.1~657	879	1016	1894	1246	1614	2860	841	1566	2418	1402	3411	4813
ILL.psd-BSU02290.1~792	2323	2179	4502	1878	2073	3951	1347	3062	4407	400	1468	1868
ILL.pspA-BSU06180.31~714	991	1064	2055	1211	1222	2433	422	192	614	44	85	129
ILL.pssA-BSU02270.1~534	1379	1349	2728	897	1174	2071	870	1616	2541	238	743	989
ILL.pstA-BSU24970.1~885	9	13	22	55	40	95	15	19	35	34	162	196
ILL.pstBA-BSU24960.1~810	9	13	22	65	56	121	12	30	42	32	154	186
ILL.pstBB-BSU24950.11~793	12	20	32	72	86	158	18	35	53	56	169	225
ILL.pstC-BSU24980.1~930	7	7	14	56	41	97	11	32	43	54	184	238
ILL.pstS-BSU24990.106~1008	16	14	30	89	68	157	16	47	63	90	325	415
ILL.ptb-BSU24090.10~909	1284	1058	2340	988	808	1796	3217	1435	4593	1683	1277	2940
ILL.pth-BSU00530.107~673	1721	1492	3213	2315	2158	4473	1205	2191	3471	778	2585	3381
ILL.ptkA-BSU36250.1~714	851	775	1626	405	328	733	449	573	1019	283	360	643
ILL.ptsG-BSU13890.229~2328	118195	110385	228560	32618	68823	101441	100714	115027	214718	9277	86461	95739
ILL.ptsH-BSU13900.6~272	14604	14655	29161	5522	8461	13983	11534	15943	27302	2312	8626	10942
ILL.ptsI-BSU13910.1~1713	132546	129199	261744	52789	71683	124472	115372	134886	250668	21621	72407	94079
ILL.pucA-BSU32510.57~1049	4	2	6	23	11	34	0	5	5	6	12	18
ILL.pucB-BSU32500.1~618	2	1	3	7	8	15	1	0	1	2	9	11
ILL.pucC-BSU32490.1~834	2	3	5	13	15	28	3	3	6	2	11	13
ILL.pucD-BSU32480.1~2238	38	40	78	82	90	172	13	33	46	12	34	46
ILL.pucE-BSU32470.1~522	9	10	19	17	31	48	9	2	11	7	10	17
ILL.pucG-BSU32520.16~1266	98	120	218	365	263	628	90	108	199	25	131	156
ILL.pucH-BSU32410.1~1341	119	126	245	91	145	236	99	124	223	50	123	173
ILL.pucI-BSU36470.181~1653	36	36	72	67	61	128	41	44	85	7	32	39
ILL.pucJ-BSU32430.96~1445	72	64	136	70	65	135	23	79	102	66	60	126
ILL.pucK-BSU32440.6~1298	43	38	81	36	29	65	14	26	40	26	48	74
ILL.pucL-BSU32450.13~1497	97	73	170	77	54	131	29	45	74	51	54	105
ILL.pucM-BSU32460.1~345	42	34	76	31	31	62	23	38	61	40	25	65
ILL.pucR-BSU32420.68~1663	244	175	419	287	251	538	85	162	249	170	159	328
ILL.pupG-BSU23490.1~816	10736	9812	20548	8074	9057	17131	12649	17753	30450	4908	9160	14071
ILL.purA-BSU40420.45~1337	16943	18303	35241	5390	6101	11491	11934	19959	31897	626	1721	2348
ILL.purB-BSU06440.1~1296	2452	2034	4486	1452	1317	2769	902	3014	3916	356	724	1080
ILL.purC-BSU06450.51~776	358	338	696	699	550	1249	57	162	219	63	82	145
ILL.purD-BSU06530.11~1279	857	871	1728	1899	1675	3574	379	372	751	72	84	156
ILL.purE-BSU06420.141~629	590	533	1100	385	258	643	192	779	971	146	213	358
ILL.purF-BSU06490.1~1431	790	761	1551	1808	1420	3228	280	263	544	90	95	185
ILL.purH-BSU06520.1~1539	884	799	1683	2076	1752	3828	297	302	598	51	74	124
ILL.purK-BSU06430.1~1143	1707	1475	3180	986	824	1810	451	1770	2223	326	571	897
ILL.purL-BSU06480.1~2229	1093	964	2054	2214	1648	3862	275	371	646	124	128	252
ILL.purM-BSU06500.102~1142	469	409	878	1149	971	2120	155	153	308	36	50	86
ILL.purN-BSU06510.1~588	251	231	481	628	533	1161	93	82	179	21	19	40
ILL.purQ-BSU06470.1~684	323	302	625	626	534	1160	69	126	195	36	55	91
ILL.purR-BSU00470.1~858	4043	4111	8151	3395	3765	7160	2139	5913	8051	3365	19225	22589
ILL.purS-BSU06460.1~255	87	73	160	168	153	321	16	28	43	17	19	35
ILL.purT-BSU02230.15~1169	1779	2274	4053	4147	2848	6995	1273	1073	2344	974	1349	2327
ILL.purU-BSU13110.1~903	4368	4489	8787	8129	8774	16903	3352	7006	10294	5662	13748	19384
ILL.pycA-BSU14860.1~3447	29118	27218	56333	142808	132204	275012	49653	79370	129032	34895	51110	85999
ILL.pyk-BSU29180.23~1780	39537	33584	72993	25046	25618	50664	45805	54454	100288	14485	26230	40733
ILL.pyrAA-BSU15510.1~1095	3619	2881	6500	1374	1573	2947	9239	2011	11248	92	653	745
ILL.pyrB-BSU15490.31~945	2565	1900	4464	680	671	1351	3873	2048	5904	97	1049	1151
ILL.pyrC-BSU15500.1~1287	3862	2929	6791	1300	1451	2751	7462	2368	9835	118	978	1096
ILL.pyrD-BSU15540.1~936	2810	2846	5653	1056	1686	2742	7661	1577	9205	32	198	230
ILL.pyrE-BSU15560.1~651	2390	2843	5230	823	1443	2266	5324	1854	7130	34	167	201
ILL.pyrF-BSU15550.1~720	2015	2178	4193	775	1204	1979	4990	1264	6246	30	126	156
ILL.pyrG-BSU37150.131~1738	25430	24745	50175	7677	8383	16060	23157	31168	54412	3065	22883	25993
ILL.pyrH-BSU16510.146~868	19623	16769	36391	16059	16872	32931	12575	23966	36593	6542	22430	28991
ILL.pyrK-BSU15530.1~771	2628	2682	5304	1121	1709	2830	8527	1576	10041	71	322	394
ILL.pyrP-BSU15480.53~1360	13385	14425	27810	4256	3807	8063	14217	14810	29032	3942	14315	18257
ILL.pyrR-BSU15470.27~572	9530	10772	20301	3938	3930	7868	4890	13571	18495	5471	14367	19841
ILL.qcrA-BSU22560.1~504	436	401	820	2248	2183	4431	1051	724	1738	766	390	1148
ILL.qcrB-BSU22550.2~676	873	782	1649	4567	4096	8663	1734	1178	3025	1256	697	1982
ILL.qcrC-BSU22540.1~768	908	940	1848	5406	4654	10060	1853	1458	3310	1549	767	2316
ILL.qodI-BSU39980.2~1015	35	38	73	135	136	271	39	79	115	2	14	16
ILL.qoxA-BSU38170.258~1223	27473	27371	54844	20374	17982	38356	16154	22845	39001	5083	8456	13539
ILL.qoxB-BSU38160.28~1977	51495	55869	107362	44974	42502	87476	35932	44818	80482	7918	15045	22967
ILL.qoxC-BSU38150.14~628	15773	16495	32267	12857	12516	25373	10878	13552	24407	2219	4422	6641
ILL.qoxD-BSU38140.2~376	9400	10348	19748	8246	7463	15709	8244	8531	16787	1616	2435	4055
ILL.queA-BSU27720.1~1029	3625	3265	6890	3089	3230	6319	2802	4300	7082	1132	2812	3939
ILL.queC-BSU13720.130~789	876	1019	1895	777	1057	1834	1476	2859	4332	740	5700	6444
ILL.queD-BSU13730.1~450	526	649	1173	505	671	1176	962	1612	2610	425	3317	3801
ILL.queE-BSU13740.1~732	1295	1415	2710	1191	1727	2918	2213	3987	6198	967	8218	9186
ILL.racA-BSU37030.1~555	362	367	729	212	184	396	302	400	702	156	296	452
ILL.racE-BSU28390.1~819	3598	3633	7227	5172	5081	10253	4132	6147	10251	4468	4664	9123
ILL.racX-BSU34430.16~699	551	534	1085	761	896	1657	116	61	177	16	30	46
ILL.radA-BSU00870.88~1464	1107	919	2026	2784	2939	5723	751	2296	3053	830	8278	9147
ILL.radC-BSU28040.1~696	1414	1301	2689	728	801	1529	722	1372	2073	684	3386	4085
ILL.rapA-BSU12430.21~1157	783	722	1505	999	936	1935	1045	1052	2093	5974	592	6566
ILL.rapB-BSU36690.20~1153	2515	2056	4571	4157	3991	8148	1777	2450	4228	1389	3261	4648
ILL.rapC-BSU03770.1~1149	2731	2824	5546	1783	2148	3931	2153	4570	6715	4135	3898	8034
ILL.rapD-BSU36380.17~1081	1243	783	2026	686	778	1464	567	684	1249	336	421	756
ILL.rapE-BSU25830.1~1128	37	17	54	33	35	68	13	17	30	18	20	38
ILL.rapF-BSU37460.1~1146	1524	1491	3015	3332	3285	6617	1516	1290	2777	4503	1597	6087
ILL.rapG-BSU40300.1~1098	1158	887	2044	1465	1480	2945	566	581	1145	439	174	612
ILL.rapH-BSU06830.1~1131	470	413	883	595	519	1114	131	249	379	301	303	600
ILL.rapI-BSU05010.50~1225	169	164	333	138	393	531	24	89	113	54	90	144
ILL.rapJ-BSU02820.6~1127	1870	1796	3663	1976	1857	3833	1811	2387	4212	1045	1012	2057
ILL.rapK-BSU18910.10~1125	298	264	562	438	650	1088	98	91	189	77	61	138
ILL.rbfA-BSU16650.17~370	3484	3273	6757	15626	15685	31311	5011	6263	11816	7984	8429	16491
ILL.rbfK-BSU29300.1~693	6	0	6	11	14	25	1	1	2	0	4	4
ILL.rbgA-BSU16050.44~892	3346	3382	6727	6188	6793	12981	3484	10010	13496	7680	23415	31102
ILL.rbsA-BSU35940.1~1482	8044	2365	10408	1121	1414	2535	26984	13352	40289	27047	2155	29194
ILL.rbsB-BSU35960.12~929	8996	2954	11943	979	1325	2304	14224	15747	29912	22462	1387	23810
ILL.rbsC-BSU35950.1~969	5830	1923	7745	710	1086	1796	14556	10391	25004	18460	1241	19509
ILL.rbsD-BSU35930.1~396	1532	463	1993	307	352	659	6904	2819	9693	6352	648	6992
ILL.rbsK-BSU35920.1~882	5997	2471	8443	1438	1594	3032	27862	11951	39626	25173	3335	28375
ILL.rbsR-BSU35910.12~992	6310	2832	9117	1534	1662	3196	37362	14209	51094	29386	4236	33222
ILL.recA-BSU16940.1~1047	12315	12576	24891	19711	21176	40887	12031	15781	27797	15256	15708	30963
ILL.recF-BSU00040.1~1113	7611	7334	14945	10306	12412	22718	7558	11157	18716	4421	7888	12310
ILL.recG-BSU15870.1~2049	1687	1512	3199	7769	6901	14670	2148	2908	5058	1628	2580	4208
ILL.recJ-BSU27620.19~2379	10424	9477	19889	6039	6884	12923	7904	14543	22435	2698	10296	13003
ILL.recN-BSU24240.1~1731	3548	3709	7257	14851	16900	31751	4413	7255	11676	3836	6809	10647
ILL.recO-BSU25280.1~768	2776	2802	5572	7434	8317	15751	2641	4476	7087	2823	4008	6822
ILL.recQ-BSU23020.1~1491	1407	1140	2547	3492	4057	7549	1044	1355	2396	837	2082	2920
ILL.recR-BSU00210.1~597	1577	1558	3135	2592	2635	5227	1070	3114	4188	2001	8665	10678
ILL.recU-BSU22310.7~627	1465	1261	2726	1050	1397	2447	749	1321	2052	456	1608	2065
ILL.recX-BSU08520.89~883	1294	1025	2280	1033	1010	2043	984	1379	2347	631	1075	1702
ILL.relA-BSU27600.1~2205	9479	8673	18152	22282	24132	46414	8621	16499	25105	5036	14378	19412
ILL.resA-BSU23150.1~540	1327	1312	2639	993	737	1730	1124	1411	2535	385	837	1222
ILL.resB-BSU23140.1~1629	3952	3594	7545	3174	2670	5844	3109	3881	6988	1017	2046	3064
ILL.resC-BSU23130.20~1195	2478	2217	4694	2312	2003	4315	2237	2340	4581	654	1118	1773
ILL.resD-BSU23120.1~723	1859	1628	3487	1935	1842	3777	1424	1626	3060	441	776	1219
ILL.resE-BSU23110.1~1770	4856	4907	9763	5135	4544	9679	3627	4869	8496	1088	1815	2903
ILL.rex-BSU12280.252~674	11841	10396	22233	9481	11108	20589	10060	13883	23945	1877	5837	7714
ILL.rghRA-BSU33660.18~425	292	311	603	549	629	1178	432	696	1120	402	1372	1771
ILL.rghRB-BSU33670.1~420	227	191	418	407	439	846	260	426	687	203	809	1012
ILL.rhgT-BSU07020.1~699	18	10	28	21	21	42	4	5	9	1	5	6
ILL.rho-BSU37080.407~1690	6309	7212	13521	8181	10982	19163	4257	10633	14891	3383	12426	15809
ILL.ribA-BSU23260.1~1197	1213	1328	2541	1559	1464	3023	876	2509	3385	1313	2032	3345
ILL.ribC-BSU16670.19~969	2295	1891	4185	3762	3330	7092	2092	3277	5406	2015	4804	6838
ILL.ribD-BSU23280.130~1215	1430	1319	2748	1672	1528	3200	2192	2957	5169	1857	2432	4295
ILL.ribE-BSU23270.11~658	534	555	1089	498	559	1057	376	1046	1419	541	777	1318
ILL.ribH-BSU23250.33~497	782	844	1624	865	961	1826	567	1556	2120	782	1288	2069
ILL.rimI-BSU05930.6~461	533	497	1029	4101	4222	8323	659	3029	3692	2129	13485	15625
ILL.rimM-BSU16020.5~529	2578	2550	5125	5231	5935	11166	5441	9332	14839	1996	15490	17539
ILL.rimO-BSU25430.1~1356	8589	8231	16820	5912	8108	14020	4934	12565	17500	1246	6648	7894
ILL.rlmB-BSU00960.1~750	1350	1235	2585	2421	2403	4824	771	1063	1834	258	906	1164
ILL.rluB-BSU23160.11~745	1535	1574	3109	1730	1892	3622	1698	1827	3523	643	1334	1978
ILL.rluD-BSU15460.1~912	5199	5337	10532	3717	4527	8244	3006	6661	9716	2622	7660	10310
ILL.rnc-BSU15930.140~889	5789	6254	11997	5399	5969	11368	3677	6772	10425	2443	5293	7732
ILL.rnhB-BSU16060.7~774	598	671	1269	4954	5806	10760	1047	3168	4198	3640	11834	15457
ILL.rnhC-BSU28620.31~972	1065	1137	2202	1127	1182	2309	865	1799	2668	1262	1195	2458
ILL.rnjA-BSU14530.1~1668	17767	16721	34485	24932	26081	51013	19051	26675	45717	8514	13437	21971
ILL.rnjB-BSU16780.1~1668	11331	10707	22038	32949	35771	68720	10272	16073	26329	8328	19919	28258
ILL.rnmV-BSU00410.69~629	1576	1543	3119	1967	2060	4027	586	2406	2990	881	5568	6449
ILL.rnpA-BSU41050.152~502	6376	6126	12500	692	756	1448	1357	9861	11208	2417	14063	16498
ILL.rnpB-BSU-misc-RNA-35.1~386	195916	152623	348420	67995	45810	113805	193116	141787	327073	772743	385835	1157080
ILL.rnr-BSU33610.19~2358	3135	3628	6762	9026	8470	17496	6782	11100	17856	5231	8179	13410
ILL.rocA-BSU37780.10~1557	759	433	1192	275	341	616	1238	1059	2302	175	133	308
ILL.rocB-BSU37770.68~1768	57	28	85	74	94	168	31	60	91	12	20	32
ILL.rocC-BSU37760.1~1413	63	71	134	103	118	221	76	89	165	52	94	146
ILL.rocD-BSU40340.32~1237	213	217	430	1305	1585	2890	307	258	565	482	1836	2318
ILL.rocE-BSU40330.223~1626	1278	1263	2541	1635	1793	3428	409	898	1309	407	2468	2876
ILL.rocG-BSU37790.1~1275	521	324	845	169	269	438	920	736	1658	129	86	213
ILL.rocR-BSU40350.10~1395	1622	1089	2711	1373	1180	2553	1070	692	1752	2285	473	2755
ILL.rodA-BSU38120.102~1283	2370	2271	4641	2326	2400	4726	1545	3579	5123	604	1731	2335
ILL.rok-BSU14240.26~601	2907	2919	5826	2619	2318	4937	3114	4410	7521	5808	3956	9765
ILL.rpe-BSU15790.5~658	1621	1560	3181	3792	2777	6569	2044	2462	4503	401	586	987
ILL.rph-BSU28370.20~757	1206	1877	3083	1388	1056	2444	1219	1787	3016	1057	1487	2546
ILL.rplA-BSU01030.95~793	94386	93183	187568	53437	63857	117294	46959	101241	148132	21750	42089	63837
ILL.rplB-BSU01190.32~865	135690	120064	255709	78414	104129	182543	73702	131781	205817	11084	61362	72482
ILL.rplC-BSU01160.37~666	83377	80004	163368	50577	60986	111563	30134	82423	112779	13110	40877	54179
ILL.rplD-BSU01170.28~651	61531	57104	118512	34949	44952	79901	23702	62344	85991	8927	30654	39589
ILL.rplE-BSU01280.27~566	52787	45326	98096	36256	54299	90555	26465	38835	65625	1380	10321	11707
ILL.rplF-BSU01310.1~540	50366	39827	90193	32384	50424	82808	26778	34929	61470	1322	9121	10458
ILL.rplI-BSU40500.1~450	2789	2694	5483	4175	4440	8615	2986	4416	7409	2052	3093	5148
ILL.rplJ-BSU01040.66~566	75291	73456	148739	38043	52834	90877	44401	78459	122497	3923	23578	27510
ILL.rplK-BSU01020.63~488	104138	115834	219951	38544	47253	85797	73496	112826	187234	20383	34710	55136
ILL.rplL-BSU01050.46~417	63264	64816	127879	35027	51341	86368	43139	76176	118352	6346	24338	30695
ILL.rplM-BSU01490.49~486	74083	64386	138459	25286	48151	73437	40023	96920	136799	12064	38946	51003
ILL.rplN-BSU01260.41~409	34161	28353	62514	23162	33994	57156	16435	24640	41113	799	7026	7826
ILL.rplO-BSU01350.31~471	51758	43619	95218	35148	53151	88299	35423	37276	73071	1863	9465	11584
ILL.rplP-BSU01230.2~436	38933	32200	71067	25057	36137	61194	16553	29580	46312	1458	9964	11441
ILL.rplQ-BSU01440.1~363	33312	31699	65011	23072	35454	58526	30968	30776	61730	2912	6504	9416
ILL.rplR-BSU01320.33~395	45941	35756	81696	26489	50748	77237	21547	31842	53457	1002	8715	9735
ILL.rplS-BSU16040.11~367	138603	126208	264787	45283	49438	94721	74898	131311	205928	105083	155859	260834
ILL.rplT-BSU28850.1~360	19477	17773	37249	8697	12193	20890	10204	23392	33624	16377	38580	54989
ILL.rplU-BSU27960.14~322	54083	54111	108176	20447	30533	50980	27016	54002	81365	11246	29321	40590
ILL.rplV-BSU01210.1~342	47174	40072	87242	25165	45744	70909	13811	39113	52931	2442	17701	20145
ILL.rplW-BSU01180.1~288	23903	20306	44175	11547	17521	29068	9373	22725	32169	2215	11465	13700
ILL.rplX-BSU01270.38~349	36198	27751	63622	19098	36015	55113	14607	24575	38153	733	7262	8010
ILL.rpmA-BSU27940.2~286	38256	39375	77619	22151	23726	45877	37760	44964	82734	18405	22350	40739
ILL.rpmB-BSU15820.77~265	26110	31956	58042	21122	22503	43625	38759	37971	76913	20692	32488	53314
ILL.rpmC-BSU01240.1~201	10727	8029	18746	5225	9645	14870	3457	7145	10669	252	2534	2807
ILL.rpmD-BSU01340.1~180	9918	8248	18084	5217	10379	15596	4681	8151	12664	261	1834	2094
ILL.rpmE-BSU37070.16~216	22319	20854	43128	7104	9478	16582	15895	22151	38158	61665	52806	114643
ILL.rpmE2-BSU30700.121~369	76	51	127	63	47	110	68	55	123	25	38	63
ILL.rpmF-BSU15080.22~201	18442	19914	38355	13330	14369	27699	29246	27862	57064	12158	22831	34993
ILL.rpmG-BSU00990.93~242	1299	1181	2480	1376	1111	2487	676	1049	1725	405	383	787
ILL.rpmG-BSU24900.23~172	21341	11906	29138	5759	6596	12355	20869	12156	27397	12952	11407	22990
ILL.rpmH-BSU41060.140~274	18501	18207	36706	6462	6815	13277	18828	19538	38352	9068	14033	23100
ILL.rpmI-BSU28860.13~213	21565	17204	38736	7114	13807	20921	7132	21804	28863	12614	44683	57359
ILL.rpmJ-BSU01400.7~120	9649	7855	17107	5338	10872	16210	5275	5915	11059	332	1462	1919
ILL.rpoA-BSU01430.1~945	168362	139449	307807	94530	164589	259119	97307	130632	227975	8199	30489	38692
ILL.rpoB-BSU01070.2~3583	138712	124229	262910	189947	218448	408395	124548	213224	336909	95590	314373	409954
ILL.rpoC-BSU01080.62~3661	110058	99085	209142	170912	188083	358995	108524	158000	266441	45898	182583	228478
ILL.rpoE-BSU37160.73~594	17153	14052	31199	6378	5412	11790	5140	14172	19234	8224	8888	17101
ILL.rpoZ-BSU15690.1~204	1578	1578	3156	1271	1463	2734	1091	2015	3057	313	553	868
ILL.rpsA-BSU22880.25~1173	24356	20157	44511	30883	23569	54452	14712	16868	31579	21024	18371	39394
ILL.rpsB-BSU16490.60~800	65918	72448	138359	39937	55927	95864	52702	81836	134425	13068	25015	38082
ILL.rpsC-BSU01220.1~657	60607	50905	111423	39034	54545	93579	25491	46804	73096	3039	17968	21463
ILL.rpsD-BSU29660.112~714	97233	91902	189120	43424	57075	100499	66476	113926	179204	20550	53827	74380
ILL.rpsE-BSU01330.1~501	49335	39321	88645	31343	52004	83347	29323	32978	61059	1121	8484	9576
ILL.rpsF-BSU40910.30~317	49672	47467	97068	20441	30127	50568	19359	45675	64899	4090	12333	16425
ILL.rpsG-BSU01110.10~480	79825	66168	145604	36915	58271	95186	39084	62464	102312	3625	18644	22540
ILL.rpsH-BSU01300.32~430	50519	36666	85280	26947	46375	73322	22492	31957	53500	1155	8719	9873
ILL.rpsI-BSU01500.21~413	44958	48036	92991	23530	35304	58834	43858	70568	114321	12976	27450	40429
ILL.rpsJ-BSU01150.113~421	45295	39124	84387	21991	29047	51038	12234	40579	52660	5557	19127	24685
ILL.rpsK-BSU01420.1~396	53310	48363	101673	34705	59650	94355	36987	43379	80778	2862	9969	12837
ILL.rpsL-BSU01100.114~530	104192	95405	199425	48096	82989	131085	48163	91260	138463	3747	26821	30541
ILL.rpsM-BSU01410.1~366	42624	41303	83872	29272	56951	86223	26641	36607	63863	2071	8527	10671
ILL.rpsN-BSU01290.23~208	22114	17346	39460	11163	22955	34118	8067	15881	23944	477	4338	4813
ILL.rpsN-BSU08880.104~373	17	15	32	8	5	13	22	15	37	10	17	27
ILL.rpsO-BSU16680.58~327	61214	56541	117752	32452	43849	76301	36123	65851	101921	15550	31117	46656
ILL.rpsP-BSU15990.1~273	9792	10113	19905	5953	5894	11847	11363	11947	23242	6626	12472	19106
ILL.rpsQ-BSU01250.23~286	22975	18021	40995	10122	21389	31511	5728	16070	21735	515	5178	5694
ILL.rpsR-BSU40890.1~240	27943	28678	56618	12405	18405	30810	18557	28833	47407	5371	8734	14112
ILL.rpsS-BSU01200.8~286	34345	26856	60862	16984	28277	45261	10043	26627	36102	1802	12826	14591
ILL.rpsT-BSU25550.51~317	42181	48923	91051	24731	22647	47378	47824	47280	93248	47689	41831	90514
ILL.rpsU-BSU25410.11~184	21738	19446	41094	10115	13735	23850	11001	18087	29982	11713	15472	27942
ILL.rsbP-BSU34110.36~1247	1447	1448	2892	1588	1719	3307	883	1594	2467	894	1343	2234
ILL.rsbQ-BSU34100.16~825	979	850	1829	1068	1158	2226	848	974	1822	826	951	1777
ILL.rsbRA-BSU04670.39~863	2062	1945	4006	3023	2795	5818	1580	3673	5229	3735	7774	11499
ILL.rsbRB-BSU13200.12~845	2572	2182	4754	1154	1236	2390	1980	2437	4388	1222	1518	2736
ILL.rsbRC-BSU19450.16~864	908	720	1628	1093	1231	2324	339	892	1228	372	1225	1597
ILL.rsbRD-BSU24760.87~923	33	38	71	113	114	227	87	80	167	1220	431	1655
ILL.rsbS-BSU04680.4~369	916	746	1649	1231	1292	2523	624	1543	2165	1128	2878	3985
ILL.rsbT-BSU04690.4~405	1303	1092	2395	1711	1960	3671	894	2268	3159	1357	4450	5808
ILL.rsbU-BSU04700.1~1008	2733	2201	4933	4303	4233	8536	2208	4757	6934	2707	8458	11165
ILL.rsbV-BSU04710.1~330	723	538	1261	1132	1188	2320	702	1218	1920	688	2118	2806
ILL.rsbW-BSU04720.1~483	1113	1080	2192	1943	2488	4431	1264	2421	3693	1232	4234	5474
ILL.rsbX-BSU04740.1~600	1520	1312	2829	2171	2382	4553	1623	3365	4992	1829	5925	7782
ILL.rseP-BSU16560.1~1269	9980	8059	18038	18373	17422	35795	11115	20485	31522	4772	18633	23408
ILL.rsfA-BSU37620.1~777	9	13	22	27	9	36	26	25	48	17	14	31
ILL.rsgI-BSU13460.1~1146	663	601	1263	792	803	1595	332	935	1272	983	2964	3949
ILL.rsiV-BSU27130.1~858	25	26	51	40	38	78	24	28	52	11	126	138
ILL.rsiW-BSU01740.14~640	6486	7124	13610	3430	3906	7336	5072	15470	20537	11681	66306	77990
ILL.rsiX-BSU23090.1~1107	5714	5902	11616	5212	6448	11660	1522	4732	6255	389	2023	2413
ILL.rsmB-BSU15740.1~1344	2562	2197	4759	10819	11771	22590	3041	4154	7187	1644	3396	5040
ILL.rsoA-BSU33222.1~240	3	10	13	5	9	14	11	32	43	5	15	20
ILL.rtp-BSU18490.41~409	72	106	177	103	68	171	106	151	258	29	204	234
ILL.rtpA-BSU02530.98~259	22	23	45	4	5	9	25	45	69	13	133	146
ILL.ruvA-BSU27740.12~617	1028	868	1896	890	832	1722	911	1286	2235	630	1194	1856
ILL.ruvB-BSU27730.11~1015	1843	1746	3581	1844	1801	3645	1796	2465	4237	1078	1859	2932
ILL.sacA-BSU38040.1~1440	1342	996	2338	2157	2636	4793	13387	28004	41370	11755	16882	28637
ILL.sacB-BSU34450.132~1553	38	35	73	20	32	52	217	465	678	462	4281	4746
ILL.sacC-BSU27030.1~2034	99	73	172	88	79	167	169	112	281	134	119	253
ILL.sacP-BSU38050.1~1386	794	467	1261	1288	1614	2902	6821	16586	23398	15019	19551	34564
ILL.sacT-BSU38070.1~831	198	159	357	604	494	1098	100	384	481	232	217	449
ILL.sacV-BSU04830.9~203	6	4	10	2	2	4	6	11	18	19	496	529
ILL.sacX-BSU38410.272~1651	444	423	867	984	1051	2035	267	694	960	494	809	1303
ILL.sacY-BSU38420.1~843	396	273	669	640	665	1305	159	512	672	244	554	798
ILL.safA-BSU27840.1~1164	55	52	107	235	286	521	143	161	304	46	185	231
ILL.salA-BSU01540.20~1078	15191	12796	27986	9479	8226	17705	16343	15103	31439	9578	11736	21316
ILL.sapB-BSU06650.107~805	480	445	925	1286	791	2077	81	354	435	563	998	1561
ILL.sat-BSU10920.1~1170	2	12	14	3	17	20	3	3	6	2	16	18
ILL.sat-BSU15590.49~1197	990	507	1496	8439	10900	19339	359	295	654	73	512	585
ILL.sbcC-BSU10650.1~3393	2964	2346	5310	4467	4088	8555	1752	2761	4526	305	532	837
ILL.sbcD-BSU10640.8~1183	650	564	1214	1162	1011	2173	424	593	1016	124	221	345
ILL.sboA-BSU37350.33~164	3	1	4	5	4	9	12	2	11	9	1	8
ILL.sboX-BSU37360.1~153	4	1	5	0	4	4	1	1	2	2	0	2
ILL.sbp-BSU15270.1~366	964	807	1771	1221	1871	3092	436	1251	1747	196	619	816
ILL.scoA-BSU38990.1~717	31	23	54	28	64	92	48	70	118	76	102	178
ILL.scoB-BSU38980.1~651	42	36	78	57	57	114	94	110	204	88	104	192
ILL.scpA-BSU23220.36~791	1731	1689	3420	954	1375	2329	887	2478	3405	448	2105	2554
ILL.scr-BSU-misc-RNA-2.1~103	37372	6219	43565	34029	10958	44987	64287	10203	72607	75929	30677	106613
ILL.scuA-BSU21750.148~729	231	229	460	2633	2649	5282	144	197	342	361	394	755
ILL.sda-BSU25690.26~184	150	104	254	76	99	175	50	125	181	84	72	155
ILL.sdaAA-BSU15860.26~928	1407	1425	2810	4750	4885	9635	2023	2415	4467	2124	2569	4728
ILL.sdaAB-BSU15850.75~737	1078	970	2048	3271	2975	6246	1501	1791	3288	1576	1953	3533
ILL.sdhA-BSU28440.1~1761	37341	28356	65683	43327	46624	89951	35776	31855	67595	30266	16316	46539
ILL.sdhB-BSU28430.3~764	16395	13161	29548	21230	23321	44551	14824	15304	30278	14492	6193	20727
ILL.sdhC-BSU28450.26~634	9206	6663	15868	9319	9811	19130	9771	8172	17832	8637	4547	13206
ILL.sdpA-BSU33750.52~528	75	72	147	57	88	145	19	95	114	44	35	79
ILL.sdpB-BSU33760.1~972	41	57	98	32	105	137	7	76	83	14	10	24
ILL.sdpI-BSU33780.1~624	369	374	743	391	579	970	184	444	628	160	288	447
ILL.sdpR-BSU33790.47~319	185	166	351	189	228	417	107	166	268	89	134	223
ILL.seaA-BSU22850.1~894	62	71	133	595	634	1229	42	196	238	362	1706	2068
ILL.secA-BSU35300.168~2693	17560	15965	33525	22166	25069	47235	16909	17677	34586	6949	9246	16195
ILL.secDF-BSU27650.1~2214	13066	11323	24389	13548	12693	26241	11985	13936	25870	6610	8114	14724
ILL.secE-BSU01000.34~213	1157	1210	2366	947	947	1894	422	939	1410	233	333	566
ILL.secG-BSU33630.39~269	5838	3915	9752	4253	3495	7748	8583	5210	13777	4949	2697	7644
ILL.secY-BSU01360.2~1297	138131	114195	252317	87153	151755	238908	81315	95118	176432	4552	25060	29616
ILL.senS-BSU08810.72~290	0	0	0	0	1	1	0	2	2	5	97	103
ILL.sepF-BSU15390.1~450	2274	2423	4695	4519	4689	9208	2565	2456	5121	1597	1508	3138
ILL.serA-BSU23070.33~1610	9948	10031	19949	77788	66535	144323	2730	4956	7705	25274	23346	48594
ILL.serC-BSU10020.31~1110	4889	4730	9619	14862	14491	29353	1926	2992	4913	4193	4950	9144
ILL.serS-BSU00130.57~1334	7083	6829	13912	1265	1201	2466	5888	9277	15161	1936	12608	14545
ILL.sigA-BSU25200.129~1244	16900	15995	32869	15685	17335	33020	8217	19123	27346	2488	26629	29189
ILL.sigB-BSU04730.1~789	1707	1486	3192	3061	2905	5966	2240	3782	6020	2206	6106	8310
ILL.sigD-BSU16470.1~765	1963	1688	3651	10374	11236	21610	633	773	1409	183	165	348
ILL.sigE-BSU15320.63~782	21	24	45	29	31	60	11	20	31	20	30	50
ILL.sigF-BSU23450.1~768	28	47	75	153	84	237	44	49	93	17	100	117
ILL.sigG-BSU15330.1~783	180	149	329	117	116	233	130	166	299	45	176	221
ILL.sigH-BSU00980.5~661	4761	3759	8517	4962	4903	9865	2378	3445	5797	1182	1502	2682
ILL.sigI-BSU13450.5~760	310	263	573	362	438	800	146	492	637	666	2196	2862
ILL.sigL-BSU34200.13~1323	1113	863	1976	836	812	1648	1280	798	2078	2335	940	3274
ILL.sigM-BSU09520.18~509	571	488	1049	508	558	1066	249	665	888	195	694	883
ILL.sigO-BSU33230.1~531	31	26	57	20	25	45	22	75	98	6	57	63
ILL.sigV-BSU27120.1~501	9	5	14	12	17	29	8	25	34	7	52	59
ILL.sigW-BSU01730.58~621	5998	6768	12766	2731	3727	6458	3346	13664	17000	8047	61754	69801
ILL.sigX-BSU23100.40~624	3027	2821	5848	2926	3344	6270	1211	2235	3445	300	955	1257
ILL.sigY-BSU38700.1~537	78	65	143	112	117	229	72	68	140	32	44	76
ILL.sigZ-BSU26840.23~553	64	58	122	74	57	131	23	59	82	48	49	97
ILL.sinI-BSU24600.100~273	149	146	293	77	82	159	219	178	397	68	68	136
ILL.sinR-BSU24610.2~337	1448	1439	2886	1490	1283	2773	1724	1761	3456	1263	994	2256
ILL.sipS-BSU23310.1~555	2746	2721	5467	4909	4605	9514	1743	2921	4678	1295	3197	4500
ILL.sipT-BSU14410.35~616	1262	1491	2745	1589	1729	3318	1648	2021	3678	1903	2038	3953
ILL.sipU-BSU04010.1~564	1377	975	2352	390	385	775	807	1428	2237	311	491	802
ILL.sipV-BSU10490.2~508	427	374	801	283	348	631	321	363	681	148	140	288
ILL.sipW-BSU24630.1~573	18	39	57	3	0	3	1	3	4	2	7	9
ILL.sirB-BSU15620.1~786	1462	902	2364	7219	8670	15889	591	817	1415	905	697	1604
ILL.sirC-BSU15630.1~489	914	584	1498	4728	5299	10027	452	580	1030	506	434	939
ILL.skfA-BSU01910.44~211	122	103	225	97	85	182	162	124	286	187	129	316
ILL.skfB-BSU01920.67~1299	133	117	250	108	139	247	80	115	195	38	70	108
ILL.skfC-BSU01935.1~1491	155	99	254	183	183	366	88	134	222	40	94	134
ILL.skfE-BSU01950.19~738	112	67	179	172	140	312	64	75	143	27	36	63
ILL.skfF-BSU01960.1~1344	109	98	207	157	142	299	35	86	121	6	46	53
ILL.skfG-BSU01970.6~521	21	41	62	73	63	136	34	41	75	2	9	11
ILL.skfH-BSU01980.5~430	43	40	83	86	77	163	18	41	58	9	27	36
ILL.sleB-BSU22930.1~918	12	6	18	15	35	50	70	264	334	234	2029	2269
ILL.slp-BSU14620.12~386	83	74	157	156	124	280	74	177	250	1358	1461	2814
ILL.slrA-BSU38229.168~326	449	551	1000	239	292	531	651	803	1456	251	201	452
ILL.slrR-BSU34380.1~459	6	17	23	1	3	4	4	2	6	2	1	3
ILL.smc-BSU15940.9~3569	11387	10346	21725	26655	27775	54430	8843	14100	22904	6895	19857	26752
ILL.smpB-BSU33600.1~471	2272	2125	4397	3249	3158	6407	1103	3187	4289	2650	3200	5852
ILL.sodA-BSU25020.37~645	34626	33179	67793	26188	21833	48021	25726	36202	61761	36854	24341	61240
ILL.sodC-BSU19400.93~683	31	31	62	820	756	1576	82	102	182	20	82	102
ILL.sodF-BSU19330.1~846	3	12	15	16	24	40	10	50	60	95	335	430
ILL.spbC-BSU33770.43~654	332	252	584	1117	1385	2502	96	196	292	172	199	371
ILL.spcB-BSU23210.1~594	1333	1414	2743	910	1146	2056	791	1813	2636	318	1449	1794
ILL.speA-BSU14630.27~1499	6856	7061	13912	2983	3447	6430	1750	7158	8920	588	5736	6333
ILL.speB-BSU37490.61~933	5615	5885	11500	4280	4839	9119	4305	8250	12554	1205	6613	7818
ILL.speD-BSU29010.118~498	15168	14531	29626	9373	8631	18004	5763	16539	21876	23530	8546	31342
ILL.speE-BSU37500.27~857	7628	7136	14752	3431	3766	7197	2182	7363	9601	885	4828	5729
ILL.splA-BSU13920.91~330	135	144	279	281	409	690	374	587	961	265	1517	1785
ILL.splB-BSU13930.1~1029	505	459	963	1037	1512	2549	1384	2135	3519	1031	5844	6882
ILL.spmA-BSU23180.1~591	39	36	75	42	73	115	100	160	260	18	278	296
ILL.spmB-BSU23170.1~537	24	39	63	42	67	109	82	146	230	7	214	222
ILL.spo0A-BSU24220.196~999	3995	3322	7317	5465	4860	10325	3885	4573	8455	4332	4373	8703
ILL.spo0B-BSU27930.321~899	1827	2015	3842	2518	3804	6322	2453	6826	9258	1567	8620	10197
ILL.spo0E-BSU13640.48~305	522	670	1191	766	819	1585	331	548	860	119	240	359
ILL.spo0F-BSU37130.1~375	383	366	749	513	432	945	328	672	993	171	1314	1486
ILL.spo0M-BSU08760.7~783	6187	5550	11737	2116	2243	4359	1595	740	2320	81	38	118
ILL.spoIIAA-BSU23470.14~367	16	20	36	57	19	76	20	29	48	3	40	43
ILL.spoIIAB-BSU23460.1~441	31	16	47	103	54	157	39	33	73	11	54	65
ILL.spoIIB-BSU28060.117~1115	25	25	50	48	55	103	3	86	89	9	105	114
ILL.spoIID-BSU36750.152~1183	362	364	726	667	838	1505	887	6252	7143	2445	21097	23569
ILL.spoIIE-BSU00640.200~2683	581	762	1343	1068	1680	2748	295	5641	5929	2655	56576	59223
ILL.spoIIGA-BSU15310.155~1084	15	15	30	19	18	37	23	18	41	13	21	34
ILL.spoIIIAA-BSU24430.1~924	7	4	11	9	5	14	22	12	33	13	67	82
ILL.spoIIIAB-BSU24420.1~516	8	1	9	1	5	6	8	14	22	0	19	19
ILL.spoIIIAC-BSU24410.1~207	1	0	1	1	0	1	3	2	5	2	7	9
ILL.spoIIIAD-BSU24400.1~402	7	3	10	5	4	9	1	7	8	5	23	28
ILL.spoIIIAE-BSU24390.1~1200	14	8	22	15	14	29	19	31	50	13	79	92
ILL.spoIIIAF-BSU24380.1~621	7	4	11	7	16	23	3	8	11	4	28	32
ILL.spoIIIAG-BSU24370.1~690	5	8	13	17	11	28	4	8	12	3	31	34
ILL.spoIIIAH-BSU24360.1~657	18	14	32	17	20	37	13	18	31	9	34	43
ILL.spoIIID-BSU36420.9~290	12	9	21	3	3	6	5	12	17	1	2	3
ILL.spoIIIE-BSU16800.70~2439	2128	2433	4561	6832	7704	14536	969	3620	4591	2831	8220	11051
ILL.spoIIIJ-BSU41040.1~786	9987	9685	19667	3589	3008	6597	4542	13656	18202	3603	15611	19216
ILL.spoIIM-BSU23530.101~745	17	14	31	32	24	56	37	77	114	79	242	321
ILL.spoIIP-BSU25530.63~1268	41	36	77	270	318	588	62	74	136	151	431	582
ILL.spoIIQ-BSU36550.1~852	92	90	182	129	78	207	121	203	324	92	228	320
ILL.spoIIR-BSU36970.1~675	49	51	100	237	245	482	138	470	608	215	1021	1236
ILL.spoIISA-BSU12830.1~747	757	689	1446	1125	1221	2346	747	2107	2854	959	2324	3284
ILL.spoIISB-BSU12820.1~171	330	365	694	748	848	1596	376	737	1157	998	1325	2345
ILL.spoIVA-BSU22800.135~1613	107	114	221	980	964	1944	238	773	1011	1266	3794	5061
ILL.spoIVB-BSU24230.1~1281	53	43	94	324	447	771	96	314	414	102	716	821
ILL.spoIVCA-BSU25770.9~1511	359	278	637	425	383	808	147	330	477	331	703	1036
ILL.spoIVFA-BSU27980.150~944	119	89	208	258	299	557	174	782	956	423	3206	3637
ILL.spoIVFB-BSU27970.1~867	84	67	151	246	202	448	138	568	706	260	1943	2205
ILL.spoVAA-BSU23440.1~621	0	0	0	1	3	4	1	2	3	1	14	15
ILL.spoVAB-BSU23430.1~426	0	0	0	2	1	3	0	1	1	0	4	4
ILL.spoVAC-BSU23420.1~453	0	0	0	2	1	3	1	1	2	0	12	12
ILL.spoVAD-BSU23410.1~1017	2	5	7	23	20	43	6	4	10	6	44	50
ILL.spoVAEA-BSU23401.8~619	16	11	27	29	37	66	7	16	23	14	49	63
ILL.spoVAEB-BSU23402.1~351	3	4	7	10	8	18	7	1	8	6	9	15
ILL.spoVAF-BSU23390.1~1482	172	164	336	341	494	835	185	235	420	135	478	613
ILL.spoVB-BSU27670.116~1672	27	34	61	32	27	59	6	60	67	43	87	131
ILL.spoVD-BSU15170.81~2021	174	144	318	710	890	1600	406	1208	1615	1297	5866	7165
ILL.spoVE-BSU15210.1~1101	4435	4072	8507	4482	5368	9850	3409	4594	8006	889	2742	3633
ILL.spoVFA-BSU16730.1~894	13	10	23	117	150	267	191	315	498	763	6290	7064
ILL.spoVFB-BSU16740.1~603	18	10	28	124	161	285	184	282	466	842	5507	6349
ILL.spoVG-BSU00490.1~294	1715	2360	4075	4264	2265	6529	2131	1238	3368	1163	4564	5727
ILL.spoVID-BSU28110.18~1745	48	48	96	444	637	1081	142	359	501	384	2559	2944
ILL.spoVIF-BSU11810.1~255	0	1	1	16	19	35	6	6	12	14	143	157
ILL.spoVK-BSU17420.503~1471	75	78	153	743	1176	1919	171	384	556	51	1355	1409
ILL.spoVM-BSU15810.1~81	38	50	88	210	132	342	55	77	129	33	17	50
ILL.spoVR-BSU09400.1~1407	54	53	107	54	78	132	27	40	67	25	203	227
ILL.spoVS-BSU16980.69~329	814	1045	1853	1510	1741	3251	1426	2499	3905	1204	6007	7207
ILL.spoVT-BSU00560.1~537	1143	1118	2260	1911	1895	3806	1584	2480	4050	557	1541	2098
ILL.sppA-BSU29530.104~1111	5948	5296	11244	1429	1125	2554	3433	4301	7734	693	2475	3168
ILL.spsA-BSU37910.1~771	14	15	29	26	23	49	5	26	31	14	76	90
ILL.spsB-BSU37900.1~1425	35	20	55	45	51	96	22	64	86	27	117	144
ILL.spsC-BSU37890.1~1170	38	32	70	55	64	119	36	53	89	14	87	101
ILL.spsD-BSU37880.1~870	36	26	62	51	63	114	30	28	58	8	53	61
ILL.spsE-BSU37870.1~1122	31	25	56	56	73	129	34	34	68	13	62	75
ILL.spsF-BSU37860.1~723	31	23	54	51	55	106	12	33	45	8	33	41
ILL.spsG-BSU37850.1~1020	41	35	76	49	57	106	31	36	67	11	43	54
ILL.spsI-BSU37840.25~765	112	107	219	93	134	227	84	86	170	39	113	152
ILL.spsJ-BSU37830.1~948	176	128	303	176	189	365	94	120	216	34	158	192
ILL.spsK-BSU37820.5~856	124	85	208	143	168	311	71	91	162	28	114	142
ILL.spsL-BSU37810.1~456	42	36	76	65	99	164	9	39	49	19	52	71
ILL.spxA-BSU11500.1~396	5564	4843	10407	3149	2418	5567	6859	4339	11149	7385	3108	10493
ILL.sqhC-BSU19320.101~1999	83	72	155	253	262	515	60	308	368	748	1444	2192
ILL.srfAA-BSU03480.298~11061	76399.1	73648	150047	5989.1	8507.95	14497	117597	80289.5	197888	7201.37	9272.86	16474.3
ILL.srfAB-BSU03490.13~10764	75702.9	71996	147698	7533.9	10633.1	18167	96271.3	56203.5	152549	1452.63	1572.14	3025.65
ILL.srfAC-BSU03510.1~3828	27091	26474	53562	2682	3630	6312	30013	18495	48559	443	449	893
ILL.srfAD-BSU03520.29~757	5231	5341	10572	479	698	1177	6759	4063	10809	101	83	184
ILL.ssbA-BSU40900.1~519	92866	102733	195599	43009	70264	113273	40657	98186	139166	9224	27275	36545
ILL.ssbB-BSU36310.1~342	378	186	564	198	171	369	158	225	384	62	123	185
ILL.sspA-BSU29570.4~213	506	458	964	478	446	924	398	635	1019	276	280	559
ILL.sspB-BSU09750.35~238	4	8	12	1	1	2	22	28	51	212	213	425
ILL.sspC-BSU19950.119~337	2	4	6	12	7	19	2	3	5	14	6	20
ILL.sspD-BSU13470.131~325	13	18	31	19	32	51	8	30	38	59	118	181
ILL.sspE-BSU08660.1~255	1456	1353	2809	762	805	1567	775	1228	2002	365	703	1068
ILL.sspF-BSU00450.160~345	49	104	153	176	149	325	561	1746	2271	3384	8825	12205
ILL.sspG-BSU32640.159~305	1	0	1	1	2	3	0	1	1	1	8	9
ILL.sspH-BSU08110.54~233	105	71	176	88	95	183	274	187	473	449	96	545
ILL.sspI-BSU28660.50~265	26	15	41	30	20	50	19	25	42	30	32	62
ILL.sspJ-BSU33340.167~307	20	9	29	23	32	55	13	31	44	37	132	170
ILL.sspK-BSU08550.108~260	5	3	8	4	6	10	2	6	8	1	4	5
ILL.sspL-BSU22000.42~170	51	41	92	94	86	180	43	53	94	41	72	113
ILL.sspM-BSU22290.1~105	1	3	4	3	1	4	0	7	7	7	8	15
ILL.sspN-BSU18020.65~211	4	1	5	107	197	304	4	4	8	51	43	94
ILL.sspO-BSU17990.1~147	0	1	1	1	0	1	1	0	1	0	0	0
ILL.sspP-BSU17980.1~147	0	0	0	1	0	1	0	1	1	1	0	1
ILL.ssrA-BSU-misc-RNA-55.1~362	56315	62971	119277	94277	81674	175951	122334	53375	175817	150382	85434	235830
ILL.ssuA-BSU08840.1~999	1	1	2	10	12	22	0	1	1	1	124	125
ILL.ssuB-BSU08830.1~768	0	1	1	11	9	20	0	2	2	1	101	102
ILL.ssuC-BSU08850.1~831	4	5	9	12	12	24	5	3	8	5	70	75
ILL.ssuD-BSU08860.1~1131	10	12	22	41	40	81	11	15	26	16	128	144
ILL.stoA-BSU13840.5~502	288	253	541	218	230	448	167	303	472	106	616	727
ILL.sucA-BSU19370.95~2929	111413	78475	189659	125275	108950	234225	88703	91173	179819	48056	28438	76437
ILL.sucC-BSU16090.7~1164	31402	27505	58907	68646	62191	130837	25970	29745	55717	38423	27597	66023
ILL.sucD-BSU16100.29~931	19213	18304	37512	51679	42198	93877	19629	19584	39256	28724	17253	45976
ILL.sufB-BSU32670.21~1418	34175	33275	67449	47045	47196	94241	26702	35451	62213	13757	19227	32997
ILL.sufC-BSU32710.194~979	17036	13700	30736	18234	20056	38290	12234	16370	28604	7989	12928	20917
ILL.sufD-BSU32700.18~1331	24497	22273	46685	32881	34327	67208	21699	25257	46858	15455	19536	34970
ILL.sufS-BSU32690.1~1221	18326	18042	36368	29478	30304	59782	16028	18899	34935	7959	11758	19717
ILL.suhB-BSU14670.24~821	919	733	1651	1338	1134	2472	471	827	1297	672	1117	1788
ILL.sul-BSU00770.1~858	1721	1337	3058	3570	3280	6850	1624	1752	3386	896	2828	3731
ILL.sumT-BSU15610.99~872	1012	463	1473	6910	9235	16145	359	297	658	82	478	560
ILL.sunA-BSU21480.55~225	790	1335	2123	3982	3225	7207	355	213	569	245	198	445
ILL.sunI-BSU21490.18~335	2777	1753	4530	1007	3402	4409	429	1361	1790	1245	2122	3367
ILL.sunT-BSU21470.58~2175	992	1238	2230	673	1003	1676	45	65	110	57	53	110
ILL.swrC-BSU06710.5~3202	14214	15067	29278	11024	11658	22682	8868	14285	23133	2916	10186	13100
ILL.tadA-BSU00180.86~571	14547	2944	17490	17374	4689	22063	37887	4306	42200	44973	18539	63525
ILL.tagA-BSU35750.64~834	5065	5060	10120	3254	3677	6931	2140	4771	6943	5319	9228	14599
ILL.tagB-BSU35760.33~1178	2367	2536	4897	2417	4876	7293	432	2598	3023	2882	7821	10704
ILL.tagC-BSU35770.5~1333	326	257	581	208	205	413	207	290	497	677	1223	1899
ILL.tagD-BSU35740.114~503	7188	6235	13420	3201	4541	7742	2866	6680	9546	3380	6060	9442
ILL.tagE-BSU35730.161~2182	7787	6531	14318	14301	21112	35413	3051	14658	17711	8427	14753	23180
ILL.tagF-BSU35720.1~2241	10038	8689	18727	25492	33069	58561	5593	16798	22371	6998	12080	19076
ILL.tagG-BSU35710.165~992	2552	2292	4841	8830	12964	21794	1384	5250	6638	1844	4662	6508
ILL.tagH-BSU35700.1~1584	7797	7478	15275	30650	39661	70311	5030	15300	20330	4591	11800	16397
ILL.tagO-BSU35530.63~1139	4804	5719	10512	4850	5620	10470	4854	9492	14335	2895	3550	6426
ILL.tasA-BSU24620.14~799	197	306	503	38	42	80	15	27	42	10	35	45
ILL.tatAC-BSU17710.24~212	343	345	688	649	502	1151	344	401	738	350	264	614
ILL.tatAD-BSU02630.13~225	3	8	11	17	13	30	5	12	17	7	31	38
ILL.tatAY-BSU05980.22~195	745	522	1267	877	645	1522	564	618	1164	1102	510	1610
ILL.tatCD-BSU02640.1~729	6	4	10	14	17	31	17	15	32	13	55	68
ILL.tatCY-BSU05990.1~765	2777	2110	4887	2894	2353	5247	1928	2448	4380	4499	1729	6224
ILL.tcyA-BSU03610.1~807	6052	4177	10224	2467	2469	4936	2220	4088	6331	1771	3787	5569
ILL.tcyB-BSU03600.1~705	2412	1749	4160	1857	2167	4024	1089	1970	3067	745	2015	2761
ILL.tcyC-BSU03590.1~744	2589	1964	4553	2005	2005	4010	1533	2217	3748	942	1852	2797
ILL.tcyJ-BSU29380.2~811	2	2	4	2	3	5	2	0	2	4	33	37
ILL.tcyK-BSU29370.12~824	1	4	5	12	6	18	1	5	6	6	18	24
ILL.tcyL-BSU29360.1~720	1	0	1	7	1	8	0	2	2	5	4	9
ILL.tcyM-BSU29350.1~708	1	2	3	3	1	4	2	0	2	0	1	1
ILL.tcyN-BSU29340.1~780	3	3	6	8	7	15	3	0	3	1	1	2
ILL.tcyP-BSU09130.17~1408	6430	1829	8259	1978	1496	3474	3015	3083	6103	385	4873	5259
ILL.tdh-BSU16990.106~1149	1640	1070	2708	1031	1026	2057	3609	2182	5791	6029	2811	8840
ILL.tdk-BSU37060.89~676	1286	1634	2918	1895	1988	3883	3829	14378	18215	17927	36044	53933
ILL.tenA-BSU11650.79~789	59	55	114	153	143	296	59	86	145	117	370	487
ILL.tenI-BSU11660.1~618	58	49	107	141	138	279	40	85	126	79	330	409
ILL.tepA-BSU16790.56~793	59	82	141	638	680	1318	164	409	576	283	2519	2812
ILL.tetB-BSU40770.122~1498	1916	1621	3537	1910	2315	4225	1033	1718	2748	1016	1063	2079
ILL.tgl-BSU31270.158~895	60	55	115	57	70	127	44	62	106	43	46	89
ILL.tgt-BSU27710.27~1172	6601	5857	12458	5387	5490	10877	5275	8054	13325	1609	4357	5966
ILL.thiC-BSU08790.133~1905	341	379	720	2223	2474	4697	621	751	1372	6384	15563	21954
ILL.thiD-BSU38020.15~830	3446	3009	6455	6526	5676	12202	2065	3000	5061	1390	1565	2953
ILL.thiE-BSU38290.1~669	816	849	1665	736	661	1397	952	950	1899	519	461	978
ILL.thiF-BSU11700.1~1011	119	113	232	234	304	538	152	184	336	156	450	606
ILL.thiG-BSU11690.1~771	61	86	147	175	181	356	75	109	184	148	385	538
ILL.thiL-BSU05900.107~1084	1638	1368	3006	10730	9379	20109	1447	9987	11433	7380	37610	44992
ILL.thiM-BSU38300.8~826	773	740	1513	676	641	1317	937	875	1817	434	421	858
ILL.thiN-BSU15800.73~717	800	706	1506	3742	3432	7174	877	1958	2819	472	848	1319
ILL.thiO-BSU11670.1~1110	79	102	181	228	227	455	109	133	242	133	458	591
ILL.thiS-BSU11680.1~201	17	14	31	26	31	57	4	16	20	13	65	80
ILL.thiT-BSU30990.100~678	398	381	779	87	115	202	191	545	736	77	546	623
ILL.thiU-BSU13240.97~699	50	37	87	130	153	283	47	66	113	494	937	1430
ILL.thiV-BSU13230.2~601	22	37	59	190	144	334	44	41	85	376	800	1176
ILL.thiW-BSU13220.1~1644	109	113	222	518	518	1036	155	172	328	801	1977	2779
ILL.thiX-BSU13210.1~765	57	58	115	237	271	508	70	82	152	323	898	1221
ILL.thrB-BSU32240.1~930	1469	1641	3108	21667	19492	41159	553	703	1256	294	368	660
ILL.thrC-BSU32250.1~1059	1957	2130	4087	25334	22884	48218	634	798	1429	337	487	824
ILL.thrS-BSU28950.44~1975	16954	14245	31199	2602	2273	4875	12655	23052	35712	12158	47982	60140
ILL.thrZ-BSU37560.54~1970	254	162	416	183	79	262	148	266	414	45	345	389
ILL.thyA-BSU17680.22~861	844	637	1472	915	966	1881	329	771	1104	193	429	624
ILL.thyA-BSU21820.84~878	1515	1498	3013	5026	5091	10117	1266	2606	3889	2688	3175	5866
ILL.tig-BSU28230.84~1358	81427	78397	159802	38778	42708	81486	53973	100402	154276	24223	48577	72816
ILL.tilS-BSU00670.1~1419	5802	5098	10896	4388	4940	9328	2445	6781	9236	3503	13010	16542
ILL.tkt-BSU17890.1~2004	39947	38229	78176	40731	31445	72176	37753	51252	89118	22613	26478	49089
ILL.tlp-BSU18030.37~288	16	9	25	209	284	493	10	9	19	54	57	112
ILL.tlpA-BSU31250.5~1993	97	112	209	1978	2371	4349	63	133	196	37	69	106
ILL.tlpB-BSU31230.1~1989	1519	1599	3118	15525	14920	30445	152	485	636	54	86	140
ILL.tlpC-BSU03440.11~1732	704	676	1380	1990	1903	3893	293	405	698	64	95	159
ILL.tmk-BSU00280.1~639	1471	1128	2599	2589	2758	5347	1475	4266	5751	2558	16263	18826
ILL.tmrB-BSU03140.5~598	174	155	329	136	106	242	179	217	395	191	134	324
ILL.tnrA-BSU13310.1~333	174	169	342	222	200	422	71	199	304	201	220	420
ILL.topA-BSU16120.1~2076	9228	8251	17479	10204	11703	21907	5126	8833	13956	2807	8005	10814
ILL.topB-BSU04260.14~2197	3984	3814	7787	5172	5365	10537	2834	4748	7582	1231	7495	8775
ILL.tpiA-BSU33920.19~780	12759	10770	23509	9687	6750	16437	15933	15136	30968	1116	2991	4105
ILL.tpx-BSU29490.14~517	6804	6173	12859	7069	3333	10402	6614	6424	12866	8982	4025	12875
ILL.treA-BSU07810.1~1686	22178	16018	38185	27388	29654	57042	17402	36894	54419	3589	13064	16670
ILL.treP-BSU07800.1~1413	23131	17600	40730	17197	16376	33573	14934	30070	44977	4904	11706	16614
ILL.treR-BSU07820.14~730	10644	8294	18934	13541	13041	26582	12596	19920	32344	2514	6520	9034
ILL.trmB-BSU29900.1~642	4870	4507	9377	3360	3907	7267	2910	6999	9902	2664	6669	9321
ILL.trmD-BSU16030.1~732	3748	3593	7339	8018	8883	16901	8501	12606	21753	3321	21200	25221
ILL.trmE-BSU41020.112~1491	6437	5079	11516	4111	5147	9258	3057	5639	8698	1879	6619	8498
ILL.trmK-BSU25180.86~736	1421	1490	2907	1883	2134	4017	1772	2317	4059	1633	2476	4093
ILL.trpA-BSU22630.1~804	1717	1535	3252	2919	3207	6126	1412	1373	2785	720	1230	1950
ILL.trpB-BSU22640.1~1203	33	36	69	179	185	364	27	49	76	85	190	275
ILL.trpC-BSU22660.1~750	8	15	23	42	56	98	6	13	19	35	70	105
ILL.trpD-BSU22670.1~1017	12	37	49	108	161	269	11	64	75	113	260	373
ILL.trpE-BSU22680.141~1688	171	224	392	872	976	1848	88	656	759	899	1510	2414
ILL.trpF-BSU22650.1~648	6	3	9	23	26	49	0	5	5	3	29	32
ILL.trpP-BSU10010.30~548	3420	4026	7440	8308	6580	14888	2106	3390	5502	3484	2673	6158
ILL.trpS-BSU11420.59~1051	3700	3779	7479	4647	4400	9047	2543	4518	7052	4074	6190	10258
ILL.truA-BSU01480.1~744	6703	7089	13792	7663	20497	28160	16957	33095	50122	338	2545	2894
ILL.truB-BSU16660.82~1011	1249	923	2172	2518	2333	4851	1324	2123	3439	1038	4207	5257
ILL.trxA-BSU28500.1~315	4638	4380	9013	3321	2652	5973	2668	4753	7430	6762	4989	11746
ILL.trxB-BSU34790.193~1143	4083	4279	8358	16308	24574	40882	2956	15354	18337	12047	22948	35015
ILL.tsf-BSU16500.102~983	58185	58844	117014	27198	32583	59781	44261	68900	113370	12515	30875	43424
ILL.tuaB-BSU35600.812~2263	63	35	98	468	488	956	47	43	90	75	82	157
ILL.tuaC-BSU35590.1~1170	68	58	126	360	381	741	42	45	87	38	66	104
ILL.tuaD-BSU35580.1~1386	97	71	168	474	573	1047	61	75	136	38	66	104
ILL.tuaE-BSU35570.1~1467	106	91	197	411	488	899	47	76	123	50	69	119
ILL.tuaF-BSU35560.29~709	56	45	100	216	233	449	35	34	70	18	16	34
ILL.tuaG-BSU35550.7~765	65	61	126	264	321	585	30	78	108	9	41	50
ILL.tuaH-BSU35540.1~1194	105	92	197	370	368	738	38	66	104	18	45	63
ILL.tufA-BSU01130.23~1213	370892	332042	702926	226169	298872	525041	259466	310569	570058	46662	90348	137027
ILL.tyrA-BSU22610.49~1164	3450	3266	6714	4168	3618	7786	2469	2886	5372	916	1657	2576
ILL.tyrS-BSU29670.189~1457	8875	7796	16655	1977	1661	3638	5313	8219	13413	2013	10585	12533
ILL.tyrZ-BSU38460.42~1283	119	89	208	52	38	90	132	440	573	164	689	858
ILL.ubiD-BSU03640.1~1422	107	100	207	81	113	194	99	114	213	48	87	135
ILL.ubiE-BSU22750.7~708	2477	2541	5018	4412	4607	9019	2684	5699	8388	2086	7534	9621
ILL.udk-BSU27330.7~642	6727	6986	13713	4007	5277	9284	7140	12190	19354	2376	9369	11751
ILL.ugtP-BSU21920.1~1149	6232	5832	12063	9287	10533	19820	2609	6252	8860	1718	4344	6061
ILL.ung-BSU37970.14~691	1075	1078	2153	1220	1205	2425	867	966	1834	478	821	1301
ILL.upp-BSU36890.135~764	10281	10054	20335	5473	5717	11190	7827	11243	19077	2348	8899	11251
ILL.uppS-BSU16530.131~913	4023	3606	7621	11159	11431	22590	5028	10712	15724	4380	14400	18774
ILL.ureA-BSU36660.819~1136	21	10	31	74	80	154	10	8	18	21	22	43
ILL.ureB-BSU36650.1~375	21	13	34	54	53	107	13	15	28	18	28	46
ILL.ureC-BSU36640.1~1710	204	224	428	410	361	771	230	189	419	150	229	379
ILL.usd-BSU36430.204~314	5	1	6	0	0	0	0	2	2	1	2	3
ILL.uvrA-BSU35160.8~2881	6146	6012	12158	17453	16853	34306	6313	7434	13739	5167	7164	12336
ILL.uvrB-BSU35170.79~2064	3220	2689	5908	6653	6633	13286	2921	3125	6044	3649	4393	8043
ILL.uvrC-BSU28490.21~1793	1482	1322	2804	1160	1170	2330	1120	1827	2942	1956	2867	4821
ILL.uvrX-BSU21500.1~1251	26	19	45	92.5535	102.865	195.657	11.6044	21	36.4663	122.933	133.744	258.615
ILL.uvsE-BSU37200.1~963	23	22	45	16	14	30	10	21	31	16	18	34
ILL.uxaA-BSU12390.1~1494	65	37	102	70	82	152	81	98	179	89	72	161
ILL.uxaB-BSU12380.1~1443	35	41	76	44	46	90	53	83	136	65	94	159
ILL.uxaC-BSU12300.1~1422	258	139	397	63	37	100	535	668	1202	3159	884	4045
ILL.uxuA-BSU12340.1~1080	8	11	19	17	19	36	12	14	26	21	42	63
ILL.valS-BSU28090.60~2702	11026	8134	19154	2142	2009	4151	6829	9458	16289	537	3344	3881
ILL.veg-BSU00440.40~300	6382	9468	15850	6245	5626	11871	12887	10676	23546	6568	12054	18620
ILL.vmlR-BSU05610.216~1859	1077	726	1803	15988	27659	43647	1708	4652	6360	3541	5962	9504
ILL.vpr-BSU38090.26~2446	71	79	150	326	180	506	81	77	158	60	39	99
ILL.walH-BSU40390.1~1368	2519	2311	4830	4869	6040	10909	2433	10087	12533	4694	54278	59117
ILL.walK-BSU40400.3~1838	1839	2036	3875	3256	4154	7410	1985	9158	11142	4803	53492	58298
ILL.walR-BSU40410.299~1006	1445	1422	2862	2375	2607	4982	1575	9587	11185	6448	69286	75819
ILL.wapA-BSU39230.24~7028	193817	167637	361444	124181	74480	198661	48592	69012	117654	695	1326	2022
ILL.whiA-BSU34750.23~973	3334	3102	6435	9907	17361	27268	2116	4319	6441	5280	27958	33288
ILL.wprA-BSU10770.19~2703	79642	73391	153023	83529	73465	156994	36545	55931	92404	3713	15693	19406
ILL.xepA-BSU12780.1~840	196	107	303	77	84	161	69	109	178	72	167	239
ILL.xerC-BSU16140.1~915	4292	4198	8490	5850	7168	13018	2829	6270	9072	1117	4301	5420
ILL.xerD-BSU23510.7~897	1398	1331	2729	4206	4434	8640	2659	6503	9160	3868	8315	12184
ILL.xhlA-BSU12790.1~270	99	48	147	43	44	87	32	68	99	57	114	170
ILL.xhlB-BSU12800.1~264	65	45	110	50	36	86	30	47	76	49	94	142
ILL.xkdA-BSU12500.126~722	146	139	285	1096	935	2031	119	306	424	308	756	1064
ILL.xkdB-BSU12520.1~837	52	36	88	27	20	47	7	18	25	22	27	50
ILL.xkdC-BSU12530.1~801	66	46	112	33	27	60	14	34	48	29	37	66
ILL.xkdD-BSU12540.1~351	15	19	34	16	8	24	9	13	22	6	16	22
ILL.xkdE-BSU12590.1~1488	392	274	666	170	159	329	153	226	384	136	309	448
ILL.xkdF-BSU12600.15~842	337	233	570	167	124	291	158	210	368	134	320	454
ILL.xkdG-BSU12610.26~961	435	264	699	202	166	368	176	231	407	232	339	571
ILL.xkdH-BSU12620.1~357	106	67	173	51	38	89	53	49	99	50	92	142
ILL.xkdI-BSU12630.1~486	186	124	310	99	70	169	108	109	218	93	194	287
ILL.xkdJ-BSU12640.1~441	175	103	278	102	56	158	79	86	165	86	139	225
ILL.xkdK-BSU12650.1~1401	642	366	1008	352	304	656	298	505	803	377	662	1039
ILL.xkdM-BSU12660.2~445	257	142	394	126	110	236	94	165	259	154	288	441
ILL.xkdN-BSU12671.74~520	137	91	228	57	42	99	44	87	133	65	95	160
ILL.xkdO-BSU12680.1~3999	1088	657	1745	721	631	1352	427	584	1012	347	1007	1354
ILL.xkdP-BSU12690.1~660	154	68	222	88	78	166	63	64	126	49	106	152
ILL.xkdQ-BSU12700.1~978	178	104	281	103	112	215	39	67	105	55	180	235
ILL.xkdR-BSU12710.1~267	22	20	42	26	11	37	7	9	17	10	36	46
ILL.xkdS-BSU12720.57~482	77	36	113	45	42	87	15	22	37	26	71	97
ILL.xkdT-BSU12730.1~1047	142	81	223	118	83	201	46	52	98	39	109	148
ILL.xkdU-BSU12740.1~579	105	59	164	74	58	132	29	37	66	40	75	115
ILL.xkdV-BSU12750.1~2064	511	259	770	222	214	436	84	168	252	94	253	348
ILL.xkdW-BSU12760.1~330	72	39	111	25	26	51	15	28	44	16	24	40
ILL.xkdX-BSU12770.1~165	24	15	39	7	8	15	5	12	17	10	19	29
ILL.xkzA-BSU12749.1~273	54	36	90	35	35	70	12	13	25	6	19	26
ILL.xkzB-BSU12672.16~165	27	11	38	8	12	20	0	12	12	1	23	24
ILL.xlyA-BSU12810.1~894	371	193	564	255	246	501	177	259	435	355	484	841
ILL.xlyB-BSU12460.121~1074	124	84	208	36	44	80	85	139	224	207	236	442
ILL.xpaC-BSU00250.24~638	718	473	1191	653	772	1425	597	2953	3552	2246	13109	15357
ILL.xpf-BSU12560.1~510	44	33	77	18	10	28	13	8	22	7	18	25
ILL.xpt-BSU22070.89~673	391	349	740	56	68	124	332	936	1271	109	303	413
ILL.xre-BSU12510.26~367	528	559	1087	689	662	1351	685	689	1354	384	496	880
ILL.xsa-BSU28510.92~1579	229	122	350	271	316	587	413	467	880	2384	461	2842
ILL.xseA-BSU24300.128~1474	1633	1622	3244	2256	2821	5077	967	3690	4637	1200	3414	4604
ILL.xseB-BSU24290.1~255	192	155	344	197	273	470	111	336	446	93	288	384
ILL.xtmA-BSU12570.63~860	265	220	484	90	67	157	90	133	221	107	198	302
ILL.xtmB-BSU12580.1~1302	468	271	736	187	127	314	136	204	339	151	304	456
ILL.xtrA-BSU12550.1~207	34	30	63	22	15	37	14	22	36	40	31	71
ILL.xylA-BSU17600.66~1403	3240	2709	5949	923	1303	2226	2286	4627	6903	565	544	1109
ILL.xylB-BSU17610.1~1500	1743	1301	3041	505	531	1036	960	2417	3371	96	188	284
ILL.xylR-BSU17590.110~1162	727	722	1449	715	948	1663	238	832	1070	309	494	803
ILL.xynA-BSU18840.219~860	4448	4678	9126	1860	2535	4395	3206	4215	7422	2416	1897	4313
ILL.xynB-BSU17580.7~1608	338	200	538	281	345	626	191	397	588	185	107	292
ILL.xynC-BSU18150.1~1269	322	255	577	501	619	1120	170	189	359	123	158	281
ILL.xynD-BSU18160.303~1844	281	264	545	524	632	1156	180	177	357	124	146	270
ILL.xynP-BSU17570.1~1392	203	119	322	148	206	354	146	248	396	200	53	253
ILL.yaaA-BSU00030.131~346	1187	861	2045	1803	2239	4042	725	1327	2085	859	1320	2208
ILL.yaaB-BSU00050.9~254	939	966	1905	1090	1767	2857	513	1243	1758	438	885	1323
ILL.yaaC-BSU00080.121~1068	16	19	35	19	11	30	1	4	5	18	24	42
ILL.yaaD-BSU00110.4~888	9323	8463	17783	14957	14137	29094	6529	7402	13933	3998	8298	12298
ILL.yaaE-BSU00120.22~612	10289	9239	19528	14294	15830	30124	6058	7846	13910	3719	8923	12650
ILL.yaaH-BSU00160.70~1353	54	32	86	39	34	73	43	69	113	114	44	158
ILL.yaaI-BSU00170.1~546	15	11	26	11	10	21	13	19	32	45	11	55
ILL.yaaK-BSU00200.24~347	2663	2390	5052	2367	2636	5003	1838	3224	5042	1597	6989	8586
ILL.yaaL-BSU00220.1~225	353	351	704	547	492	1039	310	585	896	489	1732	2222
ILL.yaaN-BSU00260.1~1161	1527	1131	2658	1887	2026	3913	1371	6471	7880	5926	30205	36242
ILL.yaaO-BSU00270.46~1488	3228	2263	5491	4915	4726	9641	4141	9279	13418	8444	42214	50658
ILL.yaaQ-BSU00290.33~362	1521	950	2462	2140	2027	4167	1359	2452	4038	1873	8205	10908
ILL.yaaR-BSU00300.13~453	1330	1001	2331	2322	2165	4487	1093	2342	3434	1669	8193	9866
ILL.yaaT-BSU00320.1~828	4561	3682	8241	6364	6322	12686	3281	7662	10917	2853	17919	20770
ILL.yabA-BSU00330.1~360	2109	1675	3783	2412	2780	5192	1352	3258	4609	1237	7889	9127
ILL.yabB-BSU00340.59~802	952	809	1761	3409	3826	7235	784	2540	3318	1218	10850	12079
ILL.yabC-BSU00360.1~879	1540	1510	3050	4717	5584	10301	1357	4308	5666	1471	14492	15963
ILL.yabD-BSU00390.79~846	1226	995	2221	4971	5353	10324	671	1925	2603	1696	8499	10200
ILL.yabE-BSU00400.1~1314	5894	5319	11213	10652	10118	20770	2717	8325	11043	3404	14013	17421
ILL.yabG-BSU00430.1~873	56	69	125	309	372	681	215	1306	1519	644	7557	8201
ILL.yabJ-BSU00480.1~378	4962	4425	9369	3502	4437	7939	2704	5879	8562	3942	20227	24196
ILL.yabK-BSU00540.60~290	529	518	1044	702	673	1375	446	768	1210	213	771	984
ILL.yabM-BSU00570.50~1648	901	798	1699	1354	1653	3007	1061	1955	3016	593	2554	3147
ILL.yabN-BSU00580.1~1470	2851	2499	5341	4913	5772	10685	2188	3363	5532	553	2479	3030
ILL.yabO-BSU00590.3~263	778	669	1446	1275	1896	3171	522	792	1285	122	615	731
ILL.yabP-BSU00600.79~381	1274	1029	2302	1926	2843	4769	781	1253	2084	153	805	959
ILL.yabQ-BSU00610.1~636	1083	1051	2133	1846	2552	4398	699	1530	2218	126	794	923
ILL.yabR-BSU00630.1~387	12679	12592	25270	7500	7726	15226	7338	14867	22172	4647	8301	12936
ILL.yabS-BSU00650.1~738	201	228	429	276	308	584	191	956	1147	330	7633	7964
ILL.yabT-BSU00660.1~1017	156	157	310	179	260	439	161	926	1091	193	8116	8332
ILL.yacD-BSU00720.47~940	2320	1694	4010	1226	1022	2248	1304	3128	4434	1118	8136	9263
ILL.yacK-BSU00880.4~1086	943	795	1738	2155	2358	4513	491	1575	2067	442	3814	4260
ILL.yacL-BSU00890.1~1101	1391	1174	2565	2162	2583	4745	965	1731	2692	628	2305	2933
ILL.yacP-BSU00970.7~519	1105	910	2015	1565	1978	3543	474	730	1215	111	557	672
ILL.yajC-BSU27700.20~286	7559	6582	14134	4442	3104	7546	11872	11080	22851	2708	4053	6769
ILL.yazA-BSU00350.1~300	262	242	503	766	885	1651	202	629	841	222	2225	2463
ILL.yazB-BSU00800.1~210	602	462	1063	603	805	1408	446	571	1005	146	720	866
ILL.ybaC-BSU01140.12~968	969	734	1703	945	1570	2515	3717	7147	10972	838	12085	12969
ILL.ybaF-BSU01470.1~798	1900	1854	3754	3685	6671	10356	1971	6140	8113	319	1454	1774
ILL.ybaJ-BSU01510.16~783	1468	1515	2974	1502	1312	2814	749	1985	2739	1111	7462	8642
ILL.ybaK-BSU01520.1~444	15	16	31	44	63	107	7	44	51	84	711	795
ILL.ybaN-BSU01570.75~839	6	1	7	4	5	9	2	2	4	4	4	8
ILL.ybaR-BSU01580.129~1565	2613	2365	4978	1969	2589	4558	1433	4921	6354	899	9191	10089
ILL.ybaS-BSU01590.82~1002	800	776	1576	753	720	1473	1205	1542	2747	649	3317	3966
ILL.ybbA-BSU01600.1~753	365	318	680	217	134	351	229	341	567	32	72	104
ILL.ybbB-BSU01640.12~1601	1170	724	1883	561	310	871	1488	936	2421	429	268	693
ILL.ybbC-BSU01650.14~1258	186	134	320	58	29	87	26	55	81	85	60	146
ILL.ybbD-BSU01660.1~1929	242	194	436	88	51	139	41	75	116	110	77	187
ILL.ybbE-BSU01670.33~1358	199	124	321	72	55	127	35	32	65	93	52	140
ILL.ybbF-BSU01680.25~1392	233	180	412	167	85	252	187	66	253	159	70	230
ILL.ybbH-BSU01690.1~852	392	235	626	278	168	446	361	107	456	236	89	323
ILL.ybbJ-BSU01710.1~483	104	46	150	69	55	124	62	36	98	34	21	55
ILL.ybbK-BSU01720.17~472	156	96	252	196	148	344	145	85	228	81	45	126
ILL.ybbP-BSU01750.65~886	1684	1446	3130	1667	1619	3286	2586	4239	6831	2312	26610	29032
ILL.ybbR-BSU01760.1~1452	5273	4399	9672	5707	6790	12497	4561	10105	14619	3979	59428	63414
ILL.ybcC-BSU01845.1~2616	325	173	498	332	365	697	148	300	448	381	1690	2071
ILL.ybcF-BSU01860.1~528	81	66	147	70	89	159	32	102	134	62	329	391
ILL.ybcH-BSU01870.23~313	39	35	74	29	59	88	9	47	56	17	169	186
ILL.ybcI-BSU01880.33~407	181	124	305	137	158	295	53	163	216	38	358	396
ILL.ybcL-BSU01890.1~1173	262	237	499	247	246	493	190	288	478	126	161	287
ILL.ybcM-BSU01900.1~315	7	7	14	9	11	20	3	13	16	3	10	13
ILL.ybdG-BSU01990.54~1031	156	134	290	215	237	452	91	170	261	39	77	116
ILL.ybdJ-BSU02000.2~673	93	89	182	172	175	347	27	99	127	38	59	97
ILL.ybdK-BSU02010.21~983	175	177	352	271	298	569	78	184	261	38	135	173
ILL.ybdM-BSU02030.9~779	208	125	331	145	154	299	163	180	340	88	161	249
ILL.ybdN-BSU02040.3~860	149	97	246	132	140	272	97	98	194	59	17	76
ILL.ybdO-BSU02050.16~1200	600	556	1154	2048	2559	4607	196	264	460	64	122	186
ILL.ybdZ-BSU31959.16~225	229	151	380	160	60	220	39	24	63	4	5	9
ILL.ybeC-BSU02120.30~1649	6928	6469	13397	21719	20770	42489	4454	2482	6894	3638	2323	5961
ILL.ybeF-BSU02150.174~422	15	18	33	17	20	37	22	20	42	17	40	57
ILL.ybfA-BSU02160.12~929	59	90	147	149	189	338	109	51	159	80	54	132
ILL.ybfB-BSU02170.1~1251	166	142	308	402	390	792	203	131	333	194	106	300
ILL.ybfE-BSU02180.124~408	392	270	662	20	50	70	31	355	386	29	149	179
ILL.ybfF-BSU02190.5~916	864	592	1444	69	110	179	84	669	761	98	322	419
ILL.ybfG-BSU02200.75~2273	988	726	1714	442	409	851	644	952	1596	860	1845	2705
[truncated: 2,237 more rows]

## Sheet: Legend
Supplementary file 6. Transcriptome-wide expression data collected for all strains as reported in TPM and raw counts.
Column A (transcript), transcript, naming system = ILL (transcriptome was built using Illumina sequencing data), official gene symbol, Locus, location of coding sequence within transcript.
Column B (WT Rep. 1), data collected from WT replicate 1.
Column C (WT Rep. 2), data collected from WT replicate 2.
Column D (WT Merged), data collected from merged wild-type replicates.
Column E (nusAdep Rep. 1), data collected from nusAdep replicate 1.
Column F (nusAdep Rep. 2), data collected from nusAdep replicate 2.
Column G (nusAdep Merged), data collected from merged nusAdep replicates.
Column H (ΔnusG Rep. 1), data collected from ΔnusG replicate 1.
Column I (ΔnusG Rep. 2), data collected from ΔnusG replicate 2.
Column J (ΔnusG Merged), data collected from merged ΔnusG replicates.
Column K (nusAdep ΔnusG Rep. 1), data collected from nusAdep ΔnusG replicate 1.
Column L (nusAdep ΔnusG Rep. 2), data collected from nusAdep ΔnusG replicate 2.
Column M (nusAdep ΔnusG Merged), data collected from merged nusAdep ΔnusG replicates.
