# Supplementary material for: NusG is an intrinsic transcription termination factor that stimulates motility and coordinates gene expression with NusA
Source: eLife journal article supplement (doi:10.7554/elife.61880), 2021-04-09
Supplement: supp [file elife-61880-supp-v1.zip › elife_poa_e61880_Supplementary_file_7.xlsx]

## Sheet: Sheet 1 
transcript	Wild Type	nusAdep	ΔnusG	nusAdep ΔnusG
ILL.cheA-BSU16430.1~2019	81.4	473.44	26.39	2.44
ILL.cheB-BSU16420.2~1075	81.76	432.05	24.26	2.51
ILL.cheC-BSU16450.10~639	90.84	567.21	31.99	4.07
ILL.cheD-BSU16460.1~501	98.93	616.26	37.03	4.79
ILL.cheR-BSU22720.25~795	23.49	149.37	34.35	165.78
ILL.cheV-BSU14010.162~1073	69.98	404.85	21.94	2.77
ILL.cheW-BSU16440.22~492	116.37	742.73	40.48	6.39
ILL.cheY-BSU16330.26~388	194.21	763.27	76.17	13.93
ILL.csrA-BSU35370.1~225	73.04	907.64	69.81	46.52
ILL.degS-BSU35500.1~1158	80.36	66.31	75.07	43.08
ILL.degU-BSU35490.2~691	160.27	136	182.33	119.53
ILL.efp-BSU24450.25~582	739.66	504.58	806.79	480.76
ILL.flgB-BSU16180.49~438	126.6	371.61	68.63	68.93
ILL.flgC-BSU16190.1~453	128.81	426.25	76.41	61.55
ILL.flgD-BSU16280.1~423	134.67	575.4	44.28	19.21
ILL.flgG-BSU16290.22~816	138.28	622.09	43.92	17.2
ILL.flgK-BSU35410.13~1536	138.96	934.34	47.42	13.34
ILL.flgL-BSU35400.11~907	166.06	1100.16	56.13	11.34
ILL.flgM-BSU35430.81~347	164.02	956.83	56.16	19.81
ILL.flhA-BSU16390.1~2034	134.39	508.85	109.91	69.12
ILL.flhB-BSU16380.1~1083	80.89	371.43	25.94	3.21
ILL.flhF-BSU16400.1~1101	62.09	336.44	20.38	1.83
ILL.flhO-BSU36400.66~878	154.16	506.74	96	56.68
ILL.flhP-BSU36390.34~843	150.76	570.52	89.9	41.49
ILL.fliD-BSU35340.18~1514	188.9	803.73	53.94	11.25
ILL.fliE-BSU16200.1~321	155.37	478.41	78.8	57.76
ILL.fliF-BSU16210.8~1618	119.12	400.22	56.28	35.4
ILL.fliG-BSU16220.13~1029	112.74	433.6	50.26	24.51
ILL.fliH-BSU16230.1~627	107.83	417.95	48.83	21.85
ILL.fliI-BSU16240.1~1317	122.34	457.19	50.8	23.32
ILL.fliJ-BSU16250.3~446	105.65	308.07	32.57	16.85
ILL.fliK-BSU16270.1~1464	115.35	467.18	38.55	15.2
ILL.fliL-BSU16300.1~423	84.67	331.42	23.84	5.33
ILL.fliM-BSU16310.34~1032	121.94	480.24	39.75	8.7
ILL.fliP-BSU16350.1~666	91.45	416.95	28.4	3.87
ILL.fliQ-BSU16360.1~270	99.49	450.6	31.78	3.01
ILL.fliR-BSU16370.1~780	71.87	330.98	24.36	3.29
ILL.fliS-BSU35330.1~402	198.3	904.38	52.34	12.1
ILL.fliT-BSU35320.1~342	285.96	1331.64	72.6	17.84
ILL.fliY-BSU16320.1~1137	137.84	560.77	51.51	10.66
ILL.fliZ-BSU16340.13~672	104.53	450.97	37.25	5.05
ILL.hag-BSU35360.95~1009	3522.71	21611.1	965.01	46.49
ILL.hemAT-BSU10380.1~1299	85.27	323.21	17.66	1.27
ILL.lonA-BSU28200.88~2412	111.91	131.77	73.98	124.3
ILL.lytA-BSU35640.21~329	146.86	547.38	105.63	58.3
ILL.lytB-BSU35630.1~2118	86.33	414.92	59.68	31.38
ILL.lytC-BSU35620.39~1529	100.04	549.25	69.71	31.76
ILL.lytD-BSU35780.44~2686	92.07	349.24	35.71	18.75
ILL.lytF-BSU09370.153~1619	149.53	646.23	45.88	21.77
ILL.mcpA-BSU31240.1~1986	113.57	713.5	36.13	1.98
ILL.mcpB-BSU31260.1~1989	73.2	568.66	15.53	3.61
ILL.mcpC-BSU13950.3~1970	68.98	547.72	20.58	7.01
ILL.motA-BSU13690.22~834	122.66	641.03	42.74	1.33
ILL.motB-BSU13680.1~786	156.44	819.72	52.07	1.29
ILL.pdeH-BSU31740.26~1255	69.72	82.28	73.56	58.97
ILL.sigD-BSU16470.1~765	99.02	576.58	35.6	9.76
ILL.sinI-BSU24600.100~273	29.83	16	37.74	14.36
ILL.sinR-BSU24610.2~337	195.86	185.63	218.78	158.52
ILL.slrA-BSU38229.168~326	54.08	28.3	73.42	25.29
ILL.slrR-BSU34380.1~459	1.22	0.21	0.3	0.17
ILL.srfAA-BSU03480.298~11061	237.61	22.54	291.71	26.93
ILL.srfAB-BSU03490.13~10764	240.42	29.04	231.16	5.09
ILL.srfAC-BSU03510.1~3828	250.9	29.04	211.76	4.32
ILL.tlpA-BSU31250.5~1993	1.82	37.27	1.59	0.95
ILL.tlpB-BSU31230.1~1989	28.94	277.69	5.5	1.34
ILL.yfmS-BSU07360.14~874	161.97	716.29	39.08	1.22
ILL.ylxF-BSU16260.1~615	131.76	513.95	44.26	19.43
ILL.ymdB-BSU16970.69~863	80.38	153.76	174.26	420.99
ILL.yoaA-BSU18530.1~534	3.91	13.4	2.26	6.78
ILL.yvaQ-BSU33690.85~1785	24.83	155.08	30.45	60.52
ILL.yviE-BSU35390.47~622	31.38	773.46	23.76	13.2
ILL.yvyC-BSU35350.55~384	185.24	540.9	46.82	10.82

## Sheet: Legend
Supplementary file 7. Expression Data for the motility regulon.
Column A (transcript), transcript, naming system = ILL (transcriptome was built using Illumina sequencing data), official gene symbol, Locus, location of coding sequence within transcript.
Column B (Wild Type), normalized TPM values collected from merged wild-type replicates for the transcript specified in column A.
Column C (nusAdep), normalized TPM values collected from merged nusAdep replicates for the transcript specified in column A.
Column D (ΔnusG), normalized TPM values collected from merged ΔnusG replicates for the transcript specified in column A.
Column E (nusAdep ΔnusG), normalized TPM values collected from merged nusAdep ΔnusG replicates for the transcript specified in column A.
