# Supplementary material for: NusG is an intrinsic transcription termination factor that stimulates motility and coordinates gene expression with NusA
Source: eLife journal article supplement (doi:10.7554/elife.61880), 2021-04-09
Supplement: supp [file elife-61880-supp-v1.zip › elife_poa_e61880_Supplementary_file_8.xlsx]

## Sheet: Sheet1
Strain	Genotype	Source
MH5636	rpoC-10His Cmr	(Qi et al. 1998)
PLBS338	prototroph	(Yakhnin et al. 2004)
PLBS538	nusG::kan Kmr	(Yakhnin et al. 2008)
PLBS727	PLBS338 / rpoC-10His Cmr	(Yakhnin et al., 2020)
PLBS728	PLBS727 / nusG::kan Cmr Kmr	(Yakhnin et al., 2020)
PLBS729	PLBS727 / amyE::Physpank-nusA lacIq Cmr Spr	(Yakhnin et al., 2020)
PLBS730	PLBS729 / ΔnusA Cmr Spr Emr	(Yakhnin et al., 2020)
PLBS731	PLBS730 / nusG::kan Cmr Spr Emr Kmr	(Yakhnin et al., 2020)
3610	pBS32-containing wild type ancestral strain	(LaVallie et al., 1989)
DS2569	3610 / cured of pBS32	(LaVallie et al., 1989)
DS6331	lacA::Phag-hagT209C tet Tcr	this study
DK8165	PLBS727 / lacA::Phag-hagT209C tet Cmr Tcr	this study
DK8166	PLBS728 / lacA::Phag-hagT209C tet Cmr Kmr Tcr	this study
DK8167	PLBS730 / lacA::Phag-hagT209C tet Cmr Spr Emr Tcr	this study
DK8168	PLBS730 / lacA::Phag-hagT209C tet Cmr Spr Emr Kmr Tcr	this study

## Sheet: Legend
Supplementary file 8. Bacillus subtilis strains used in this study.
