# Supplementary figures and images for: NusG is an intrinsic transcription termination factor that stimulates motility and coordinates gene expression with NusA
Source: eLife journal article supplement (doi:10.7554/elife.61880), 2021-04-09

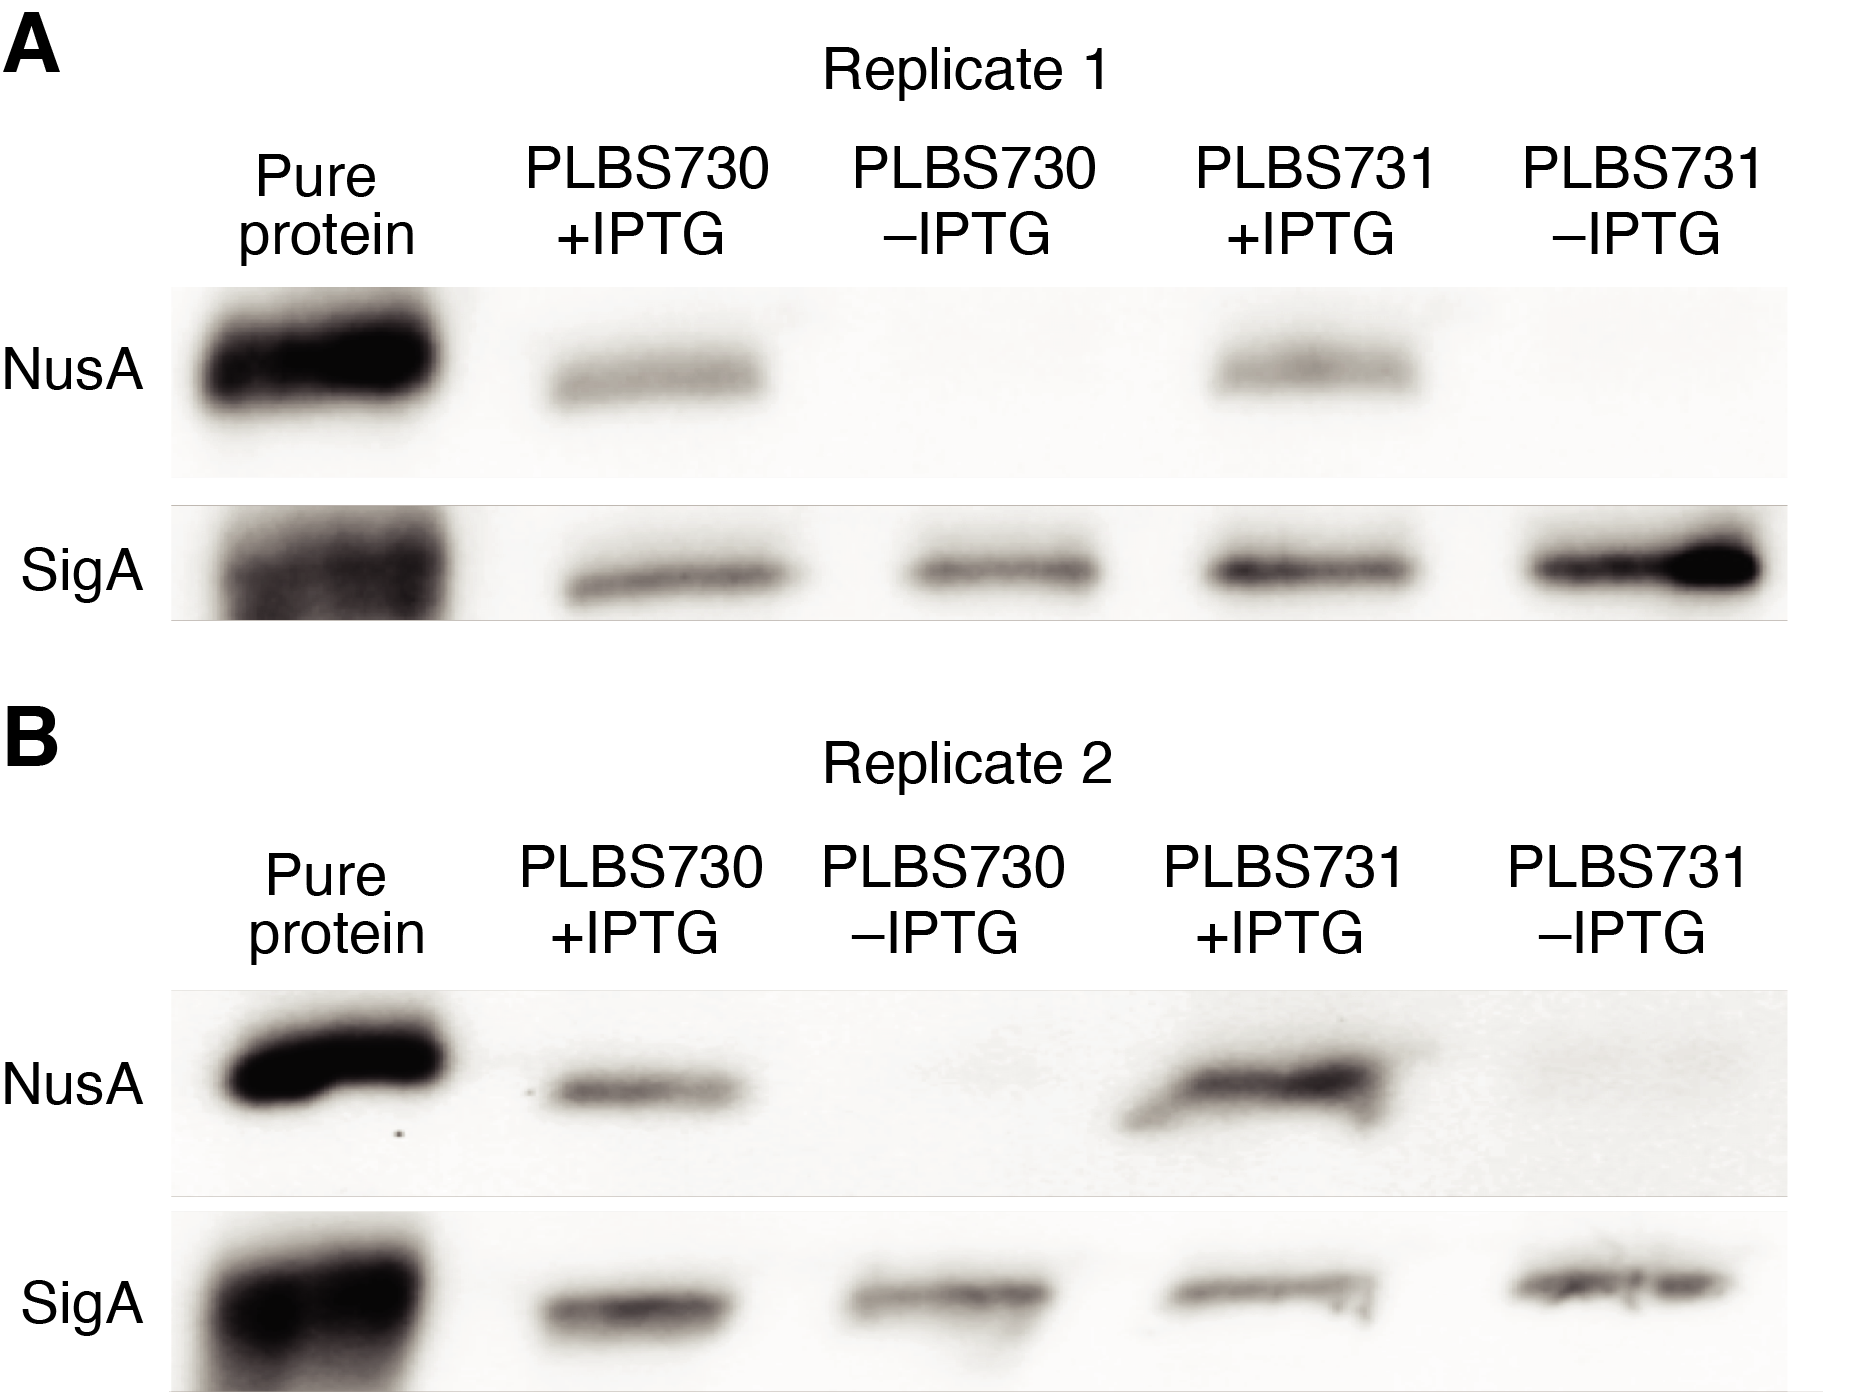

Supplement: supp [file elife-61880-supp-v1.zip › elife_poa_e61880_Figure_1_figure_supplement_1.tif]

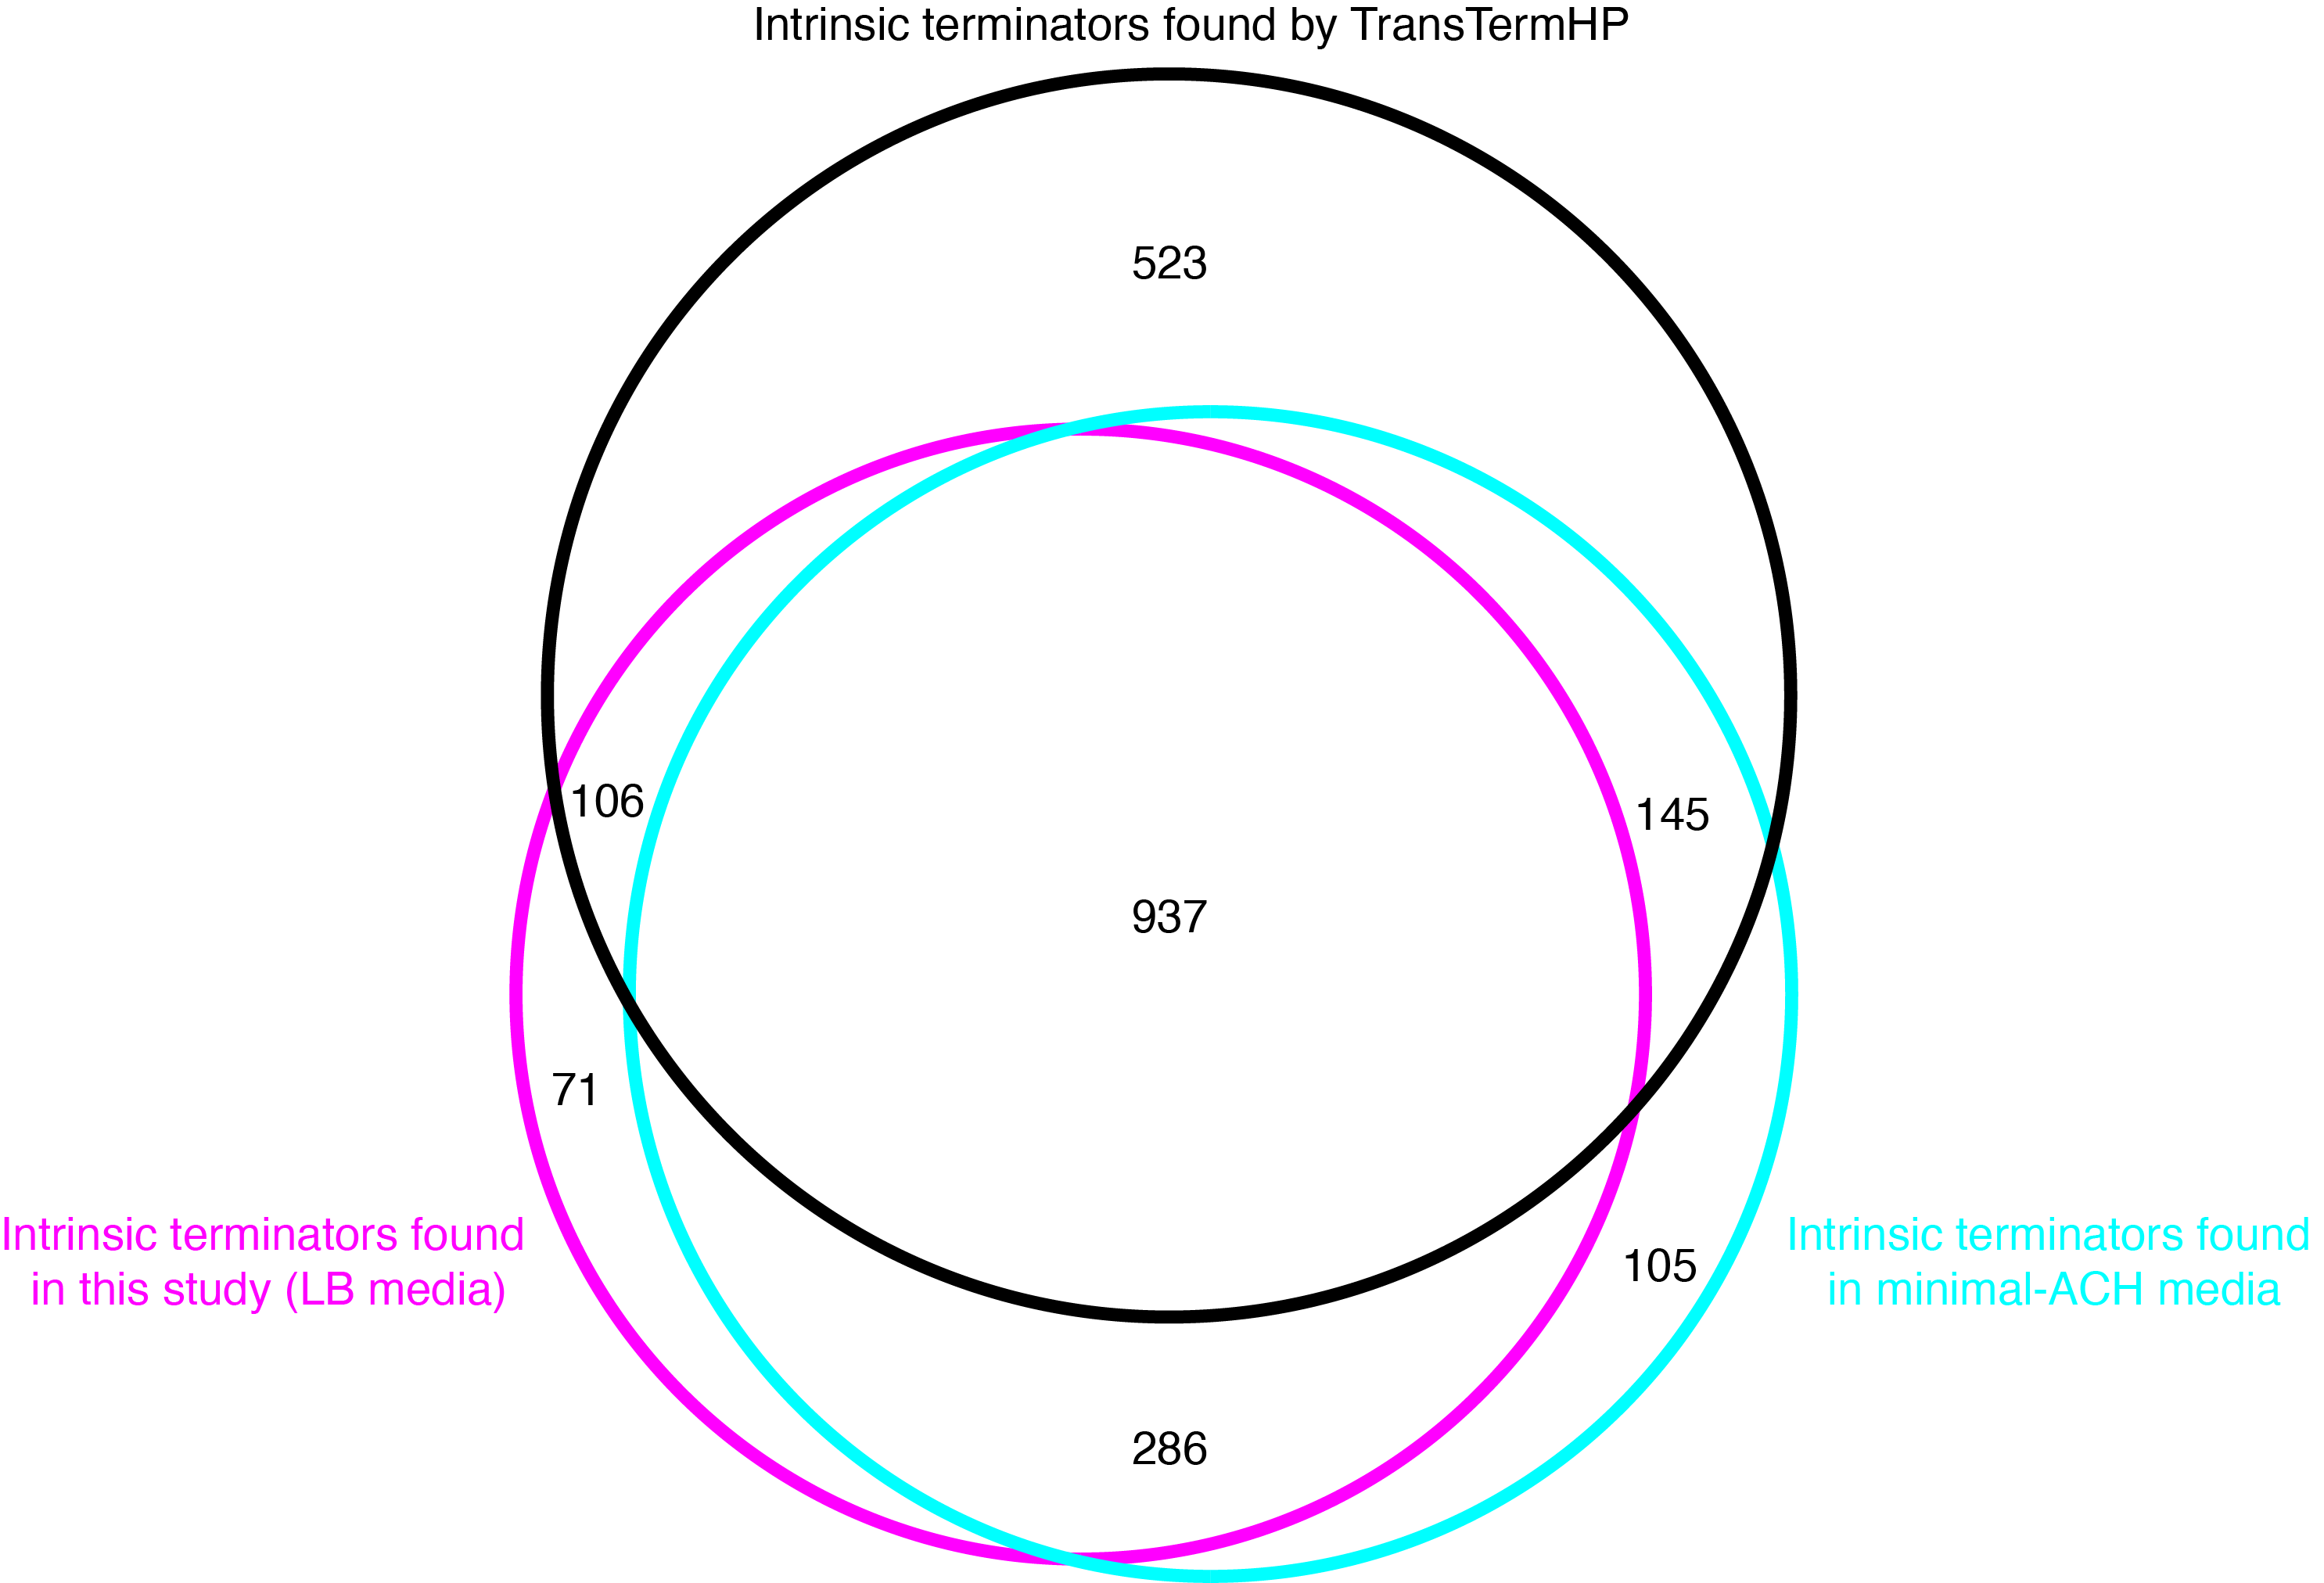

Supplement: supp [file elife-61880-supp-v1.zip › elife_poa_e61880_Figure_1_figure_supplement_2.tif]

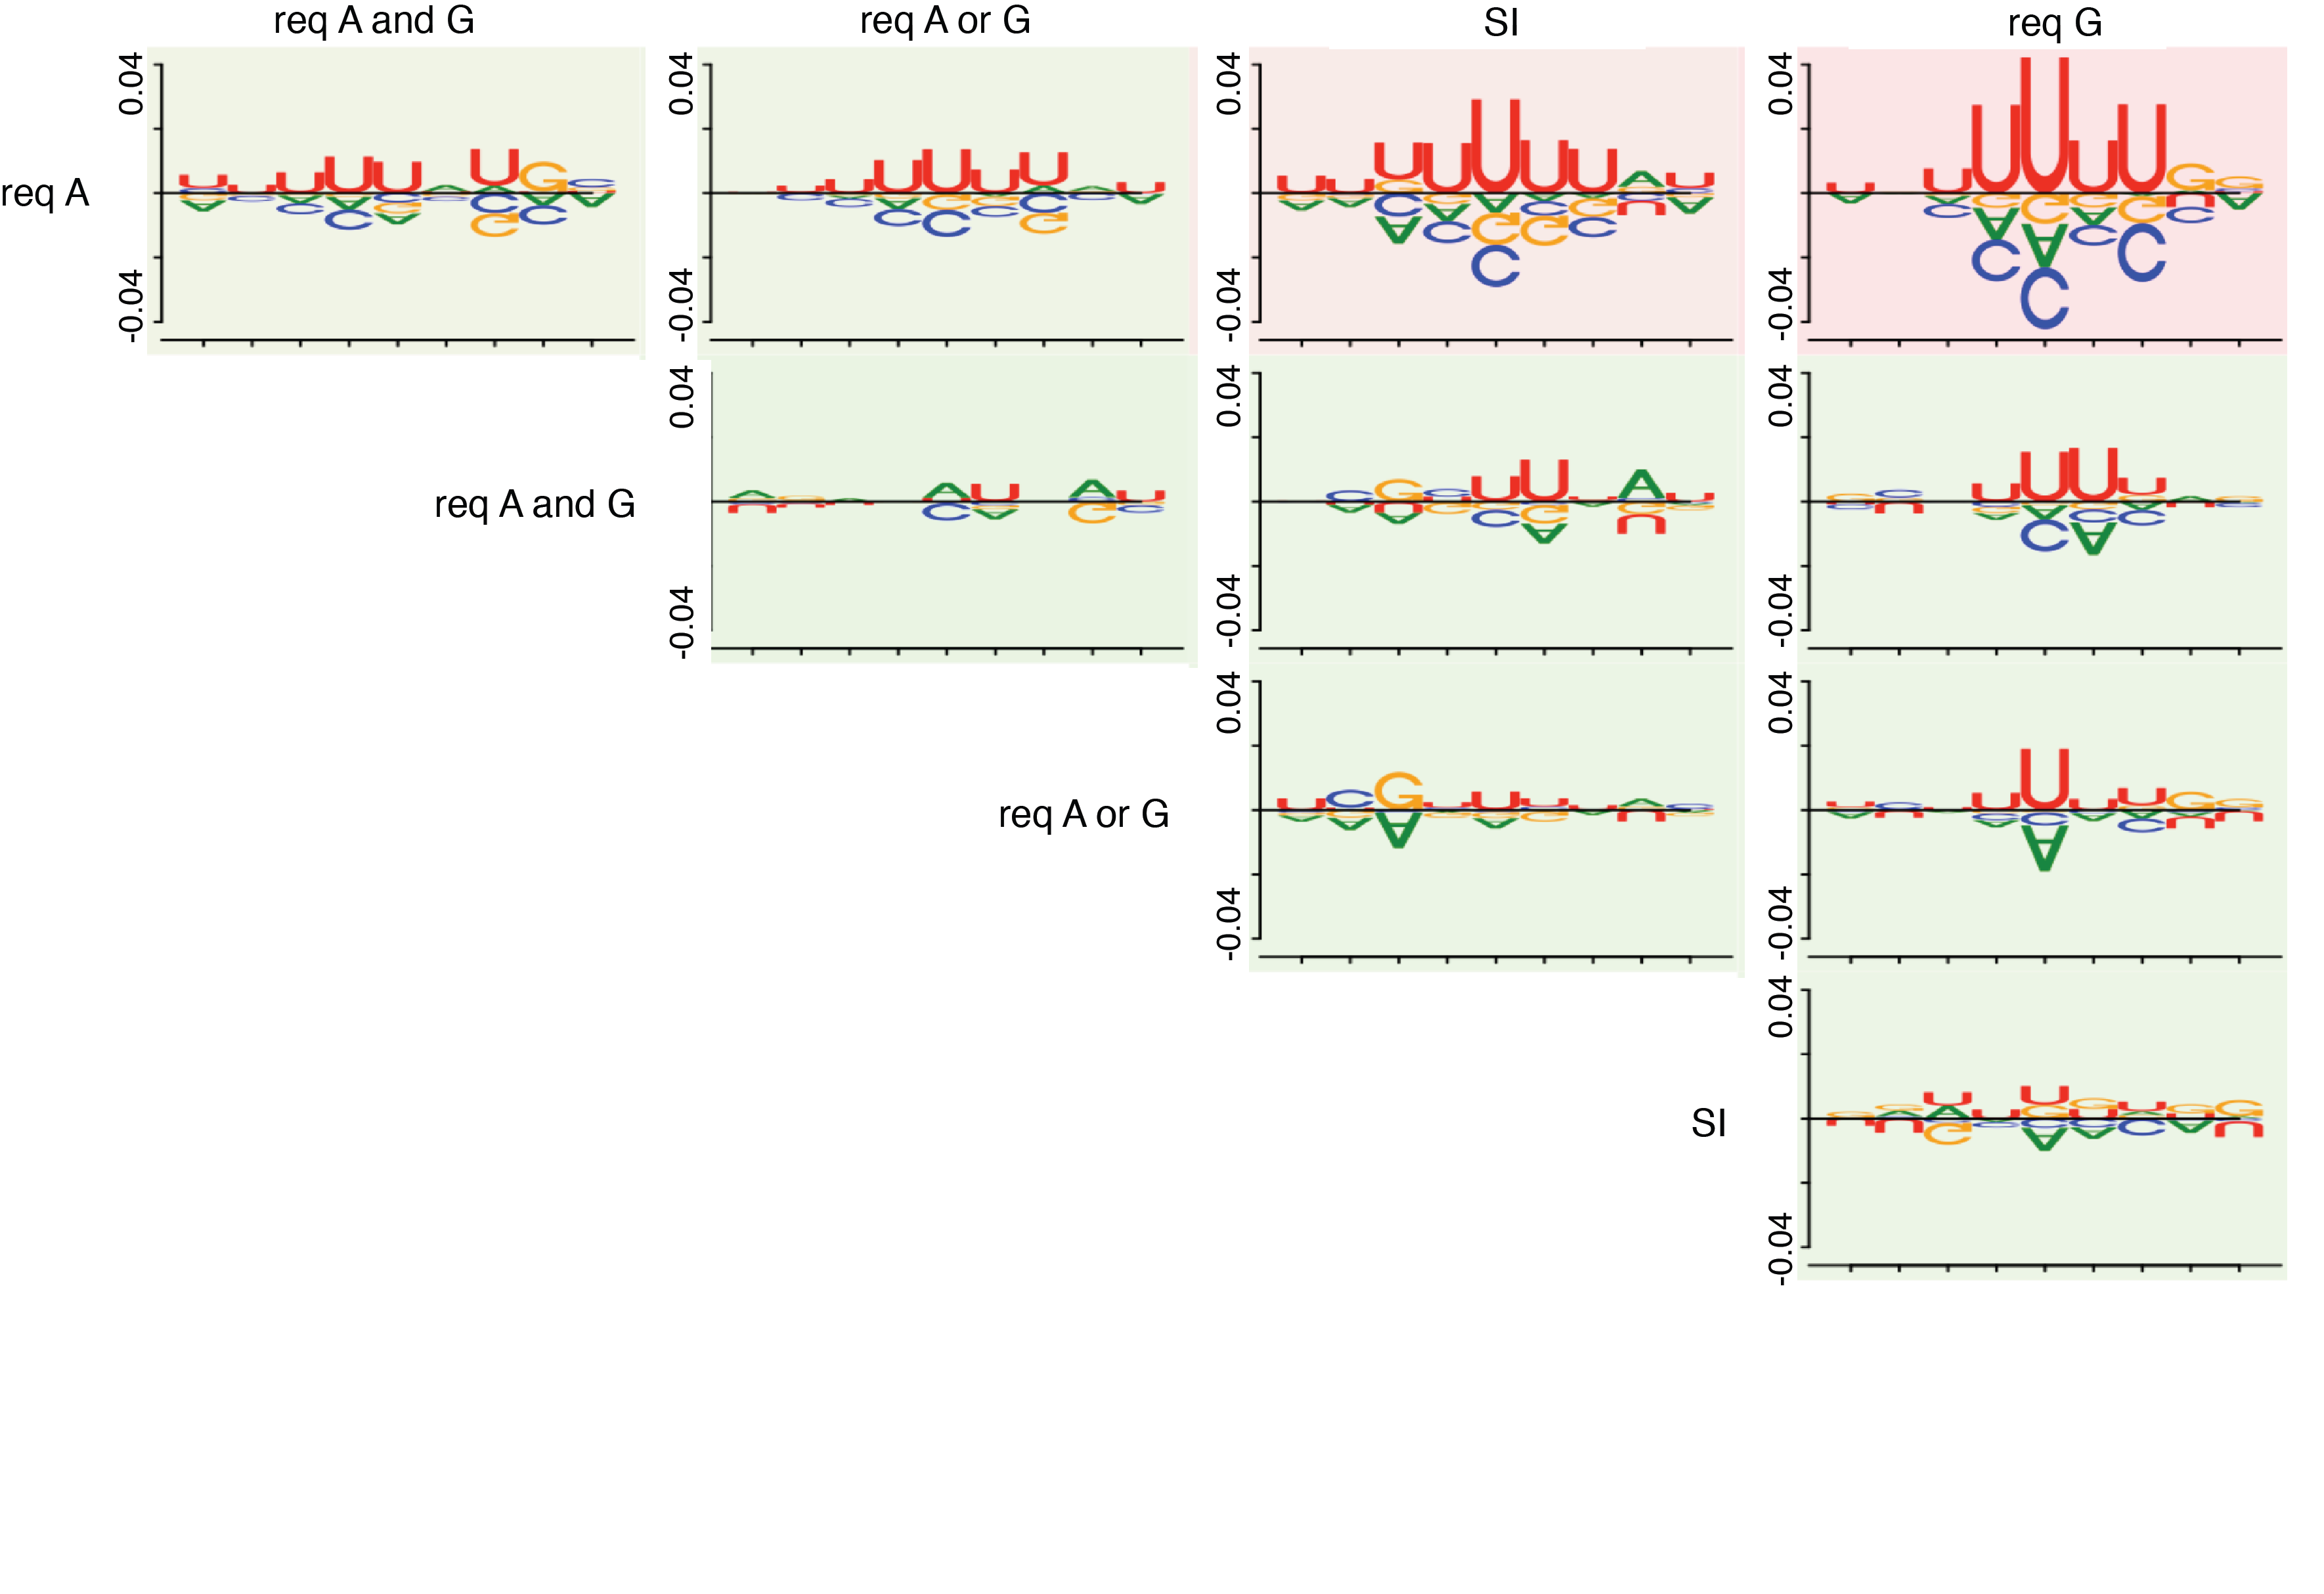

Supplement: supp [file elife-61880-supp-v1.zip › elife_poa_e61880_Figure_1_figure_supplement_3.tif]

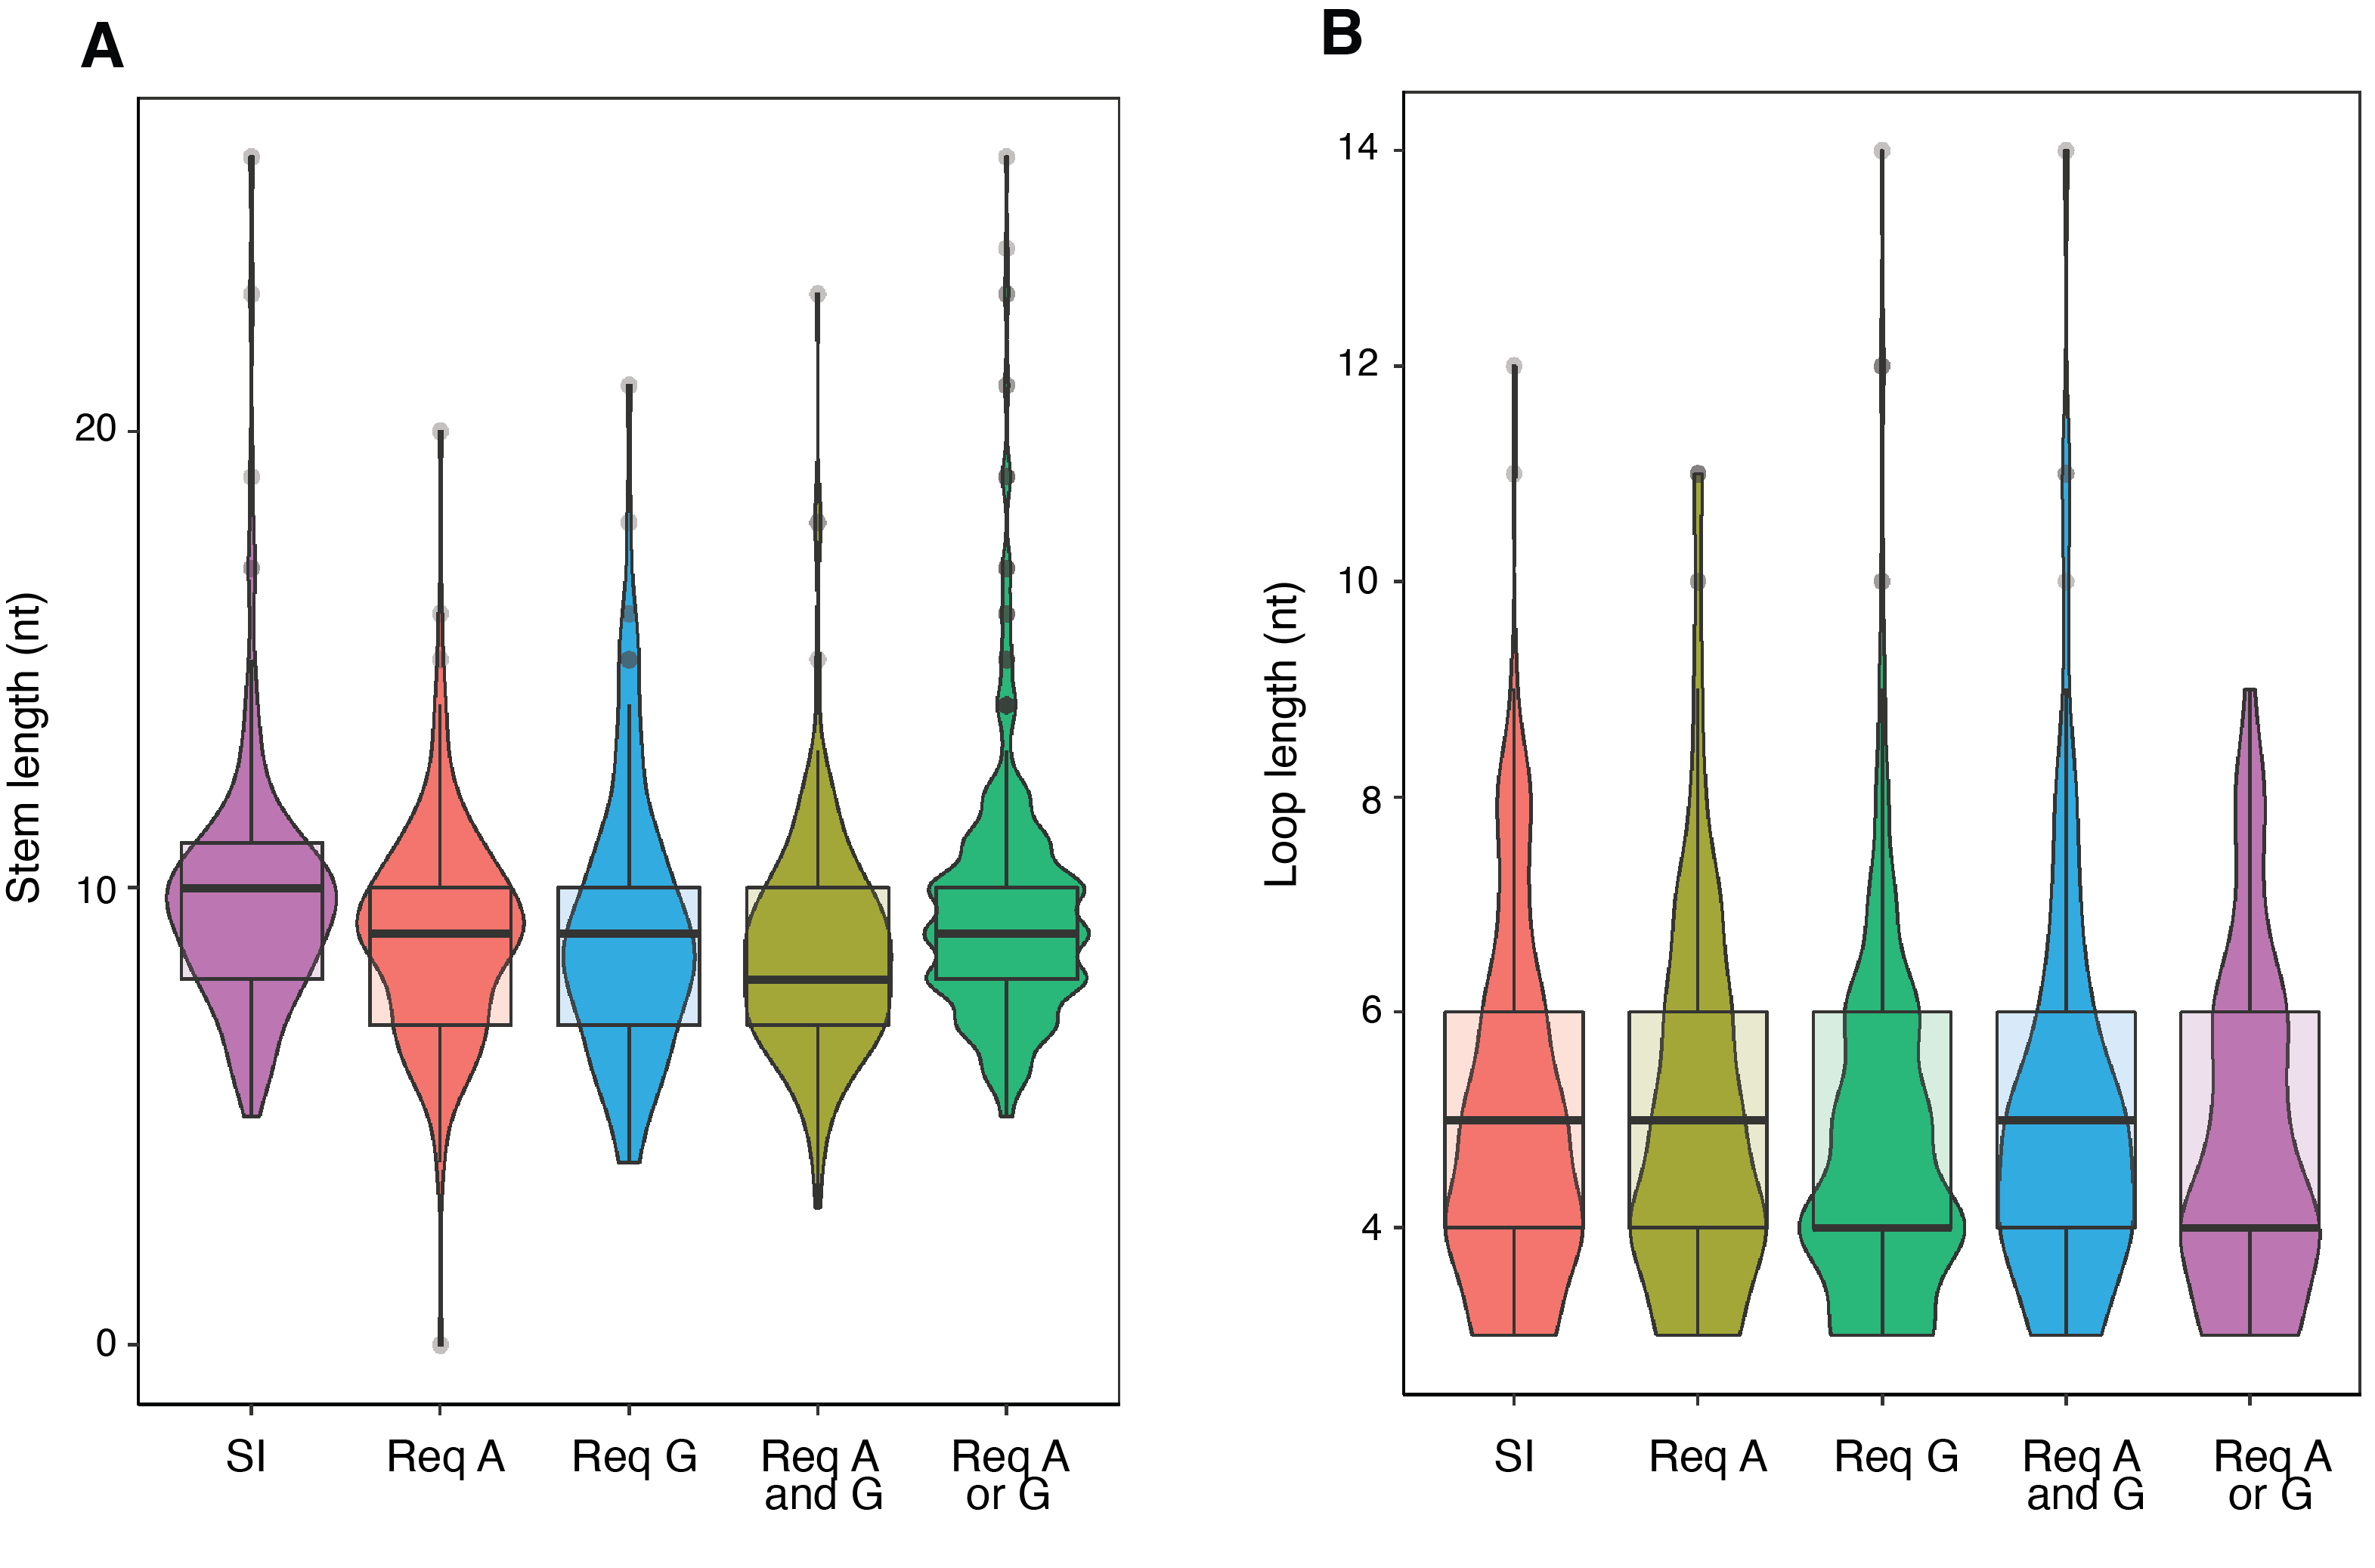

Supplement: supp [file elife-61880-supp-v1.zip › elife_poa_e61880_Figure_1_figure_supplement_4.tif]

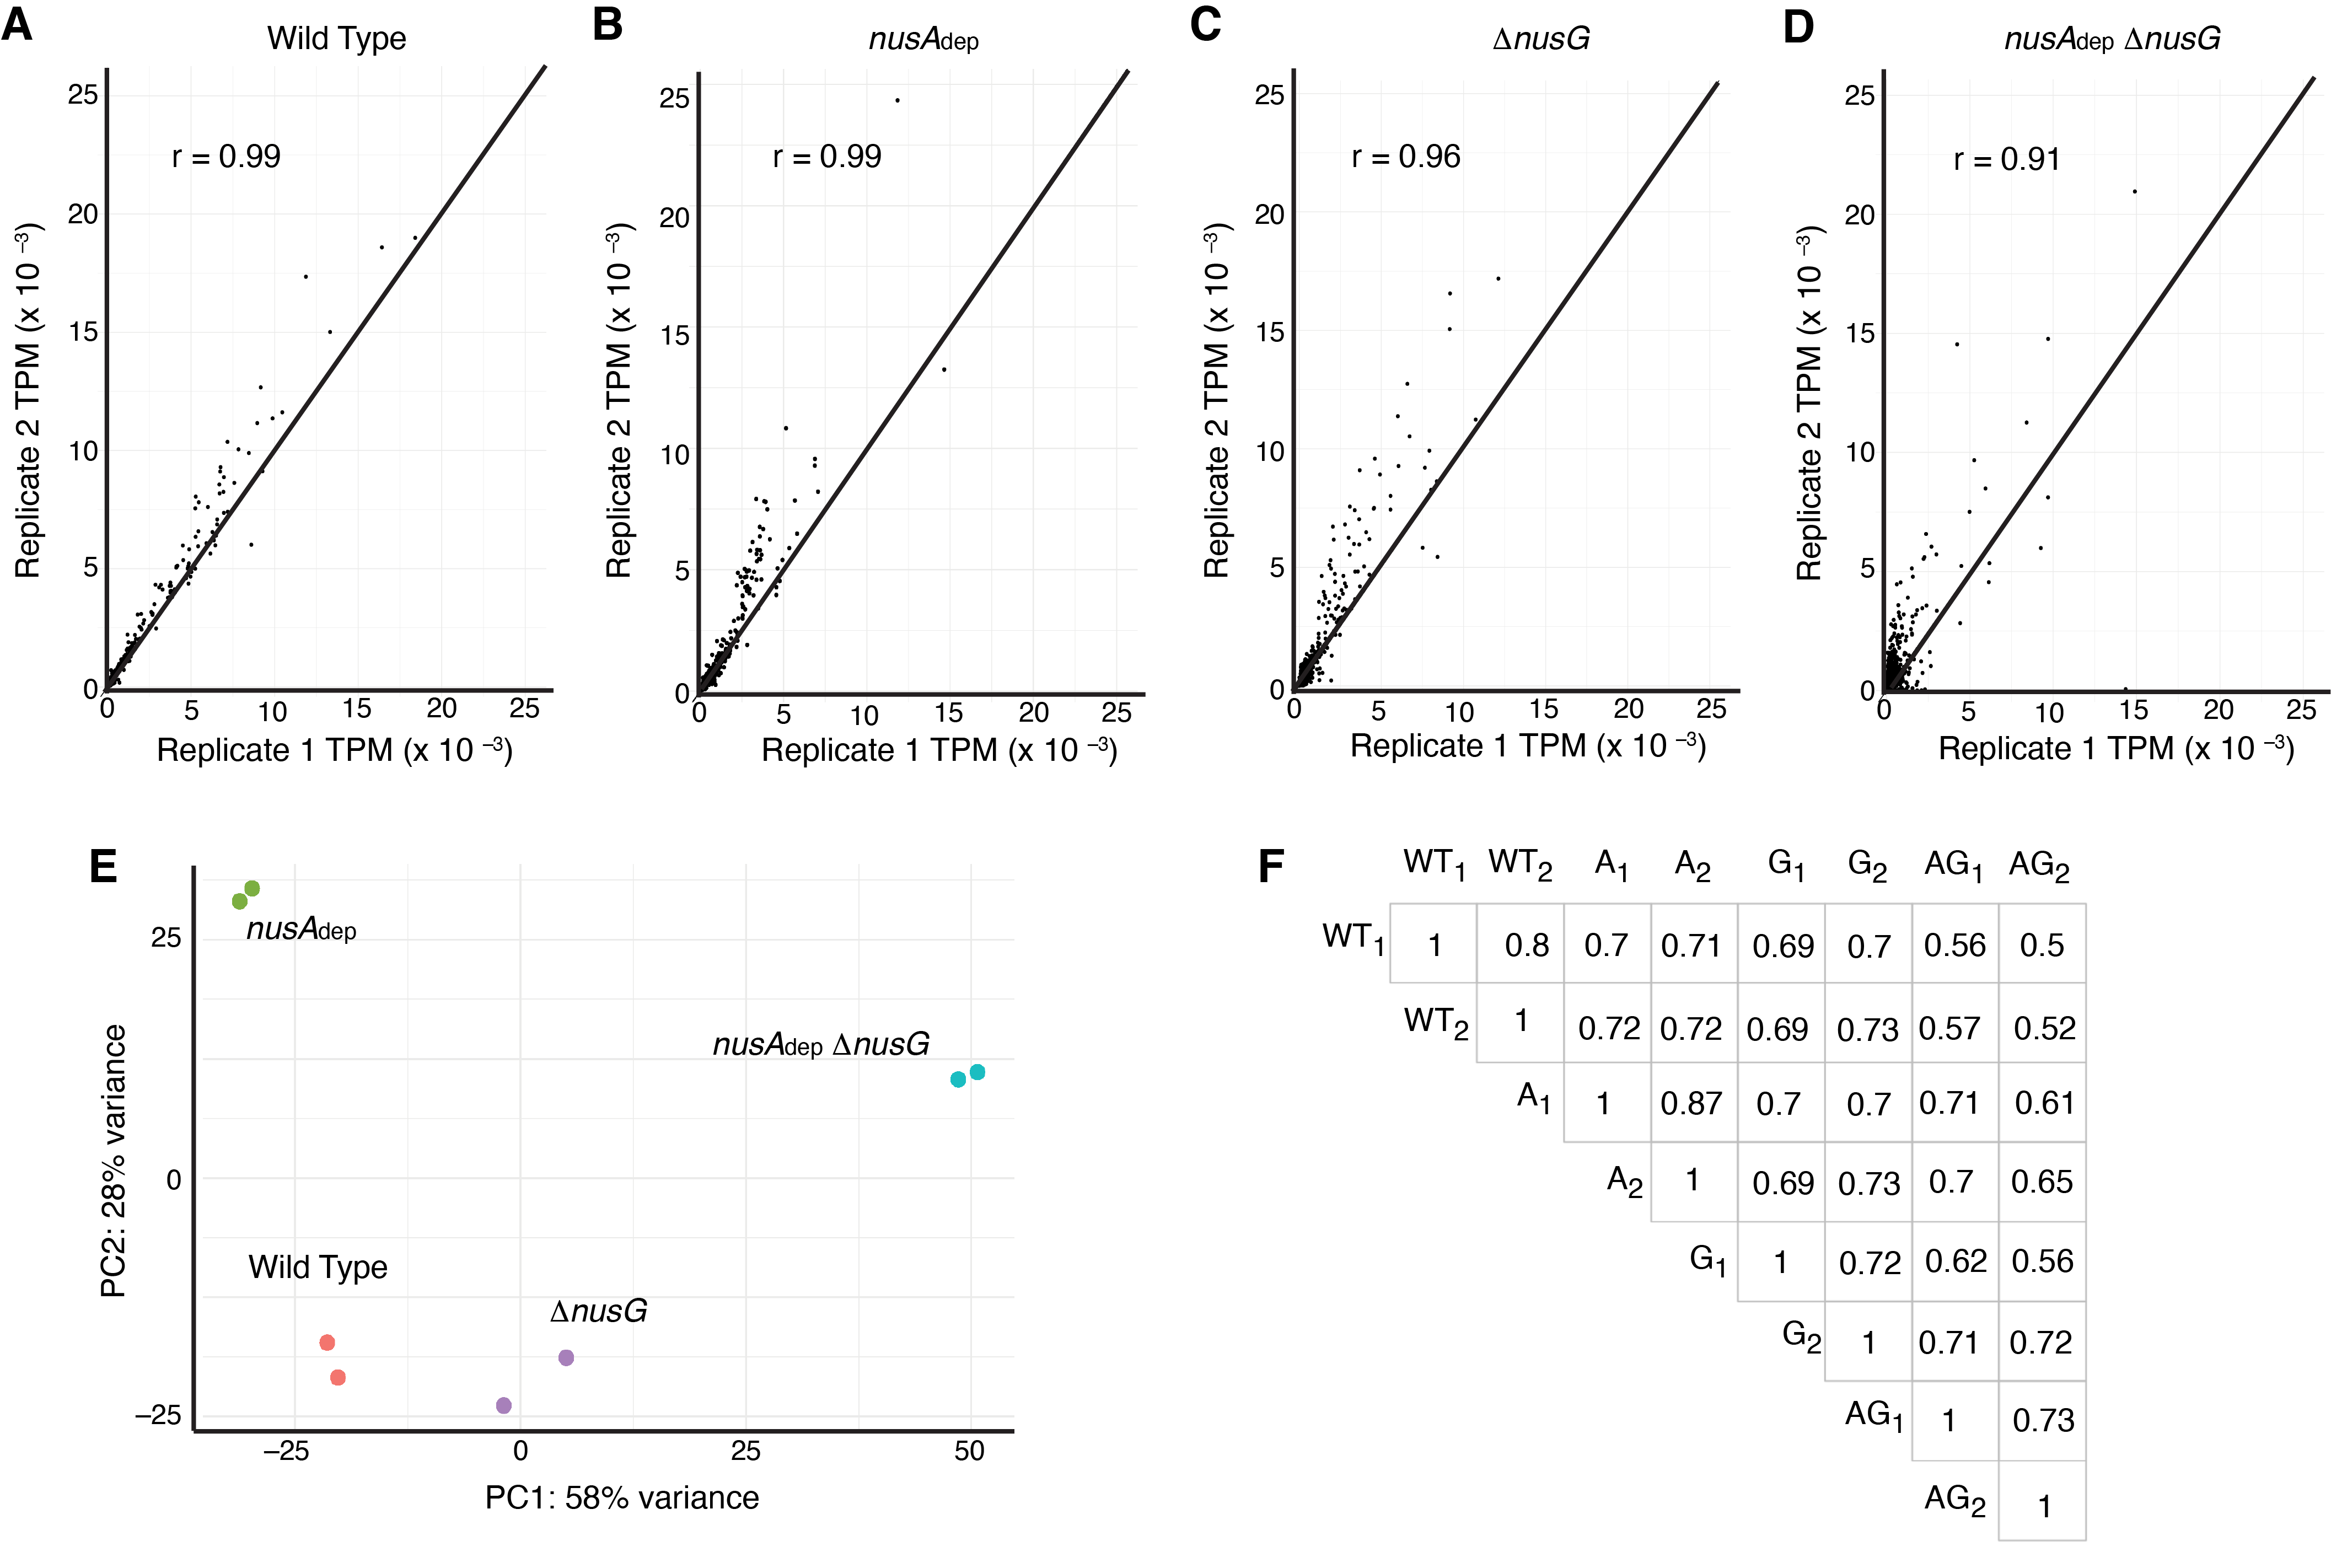

Supplement: supp [file elife-61880-supp-v1.zip › elife_poa_e61880_Figure_1_figure_supplement_5.tif]

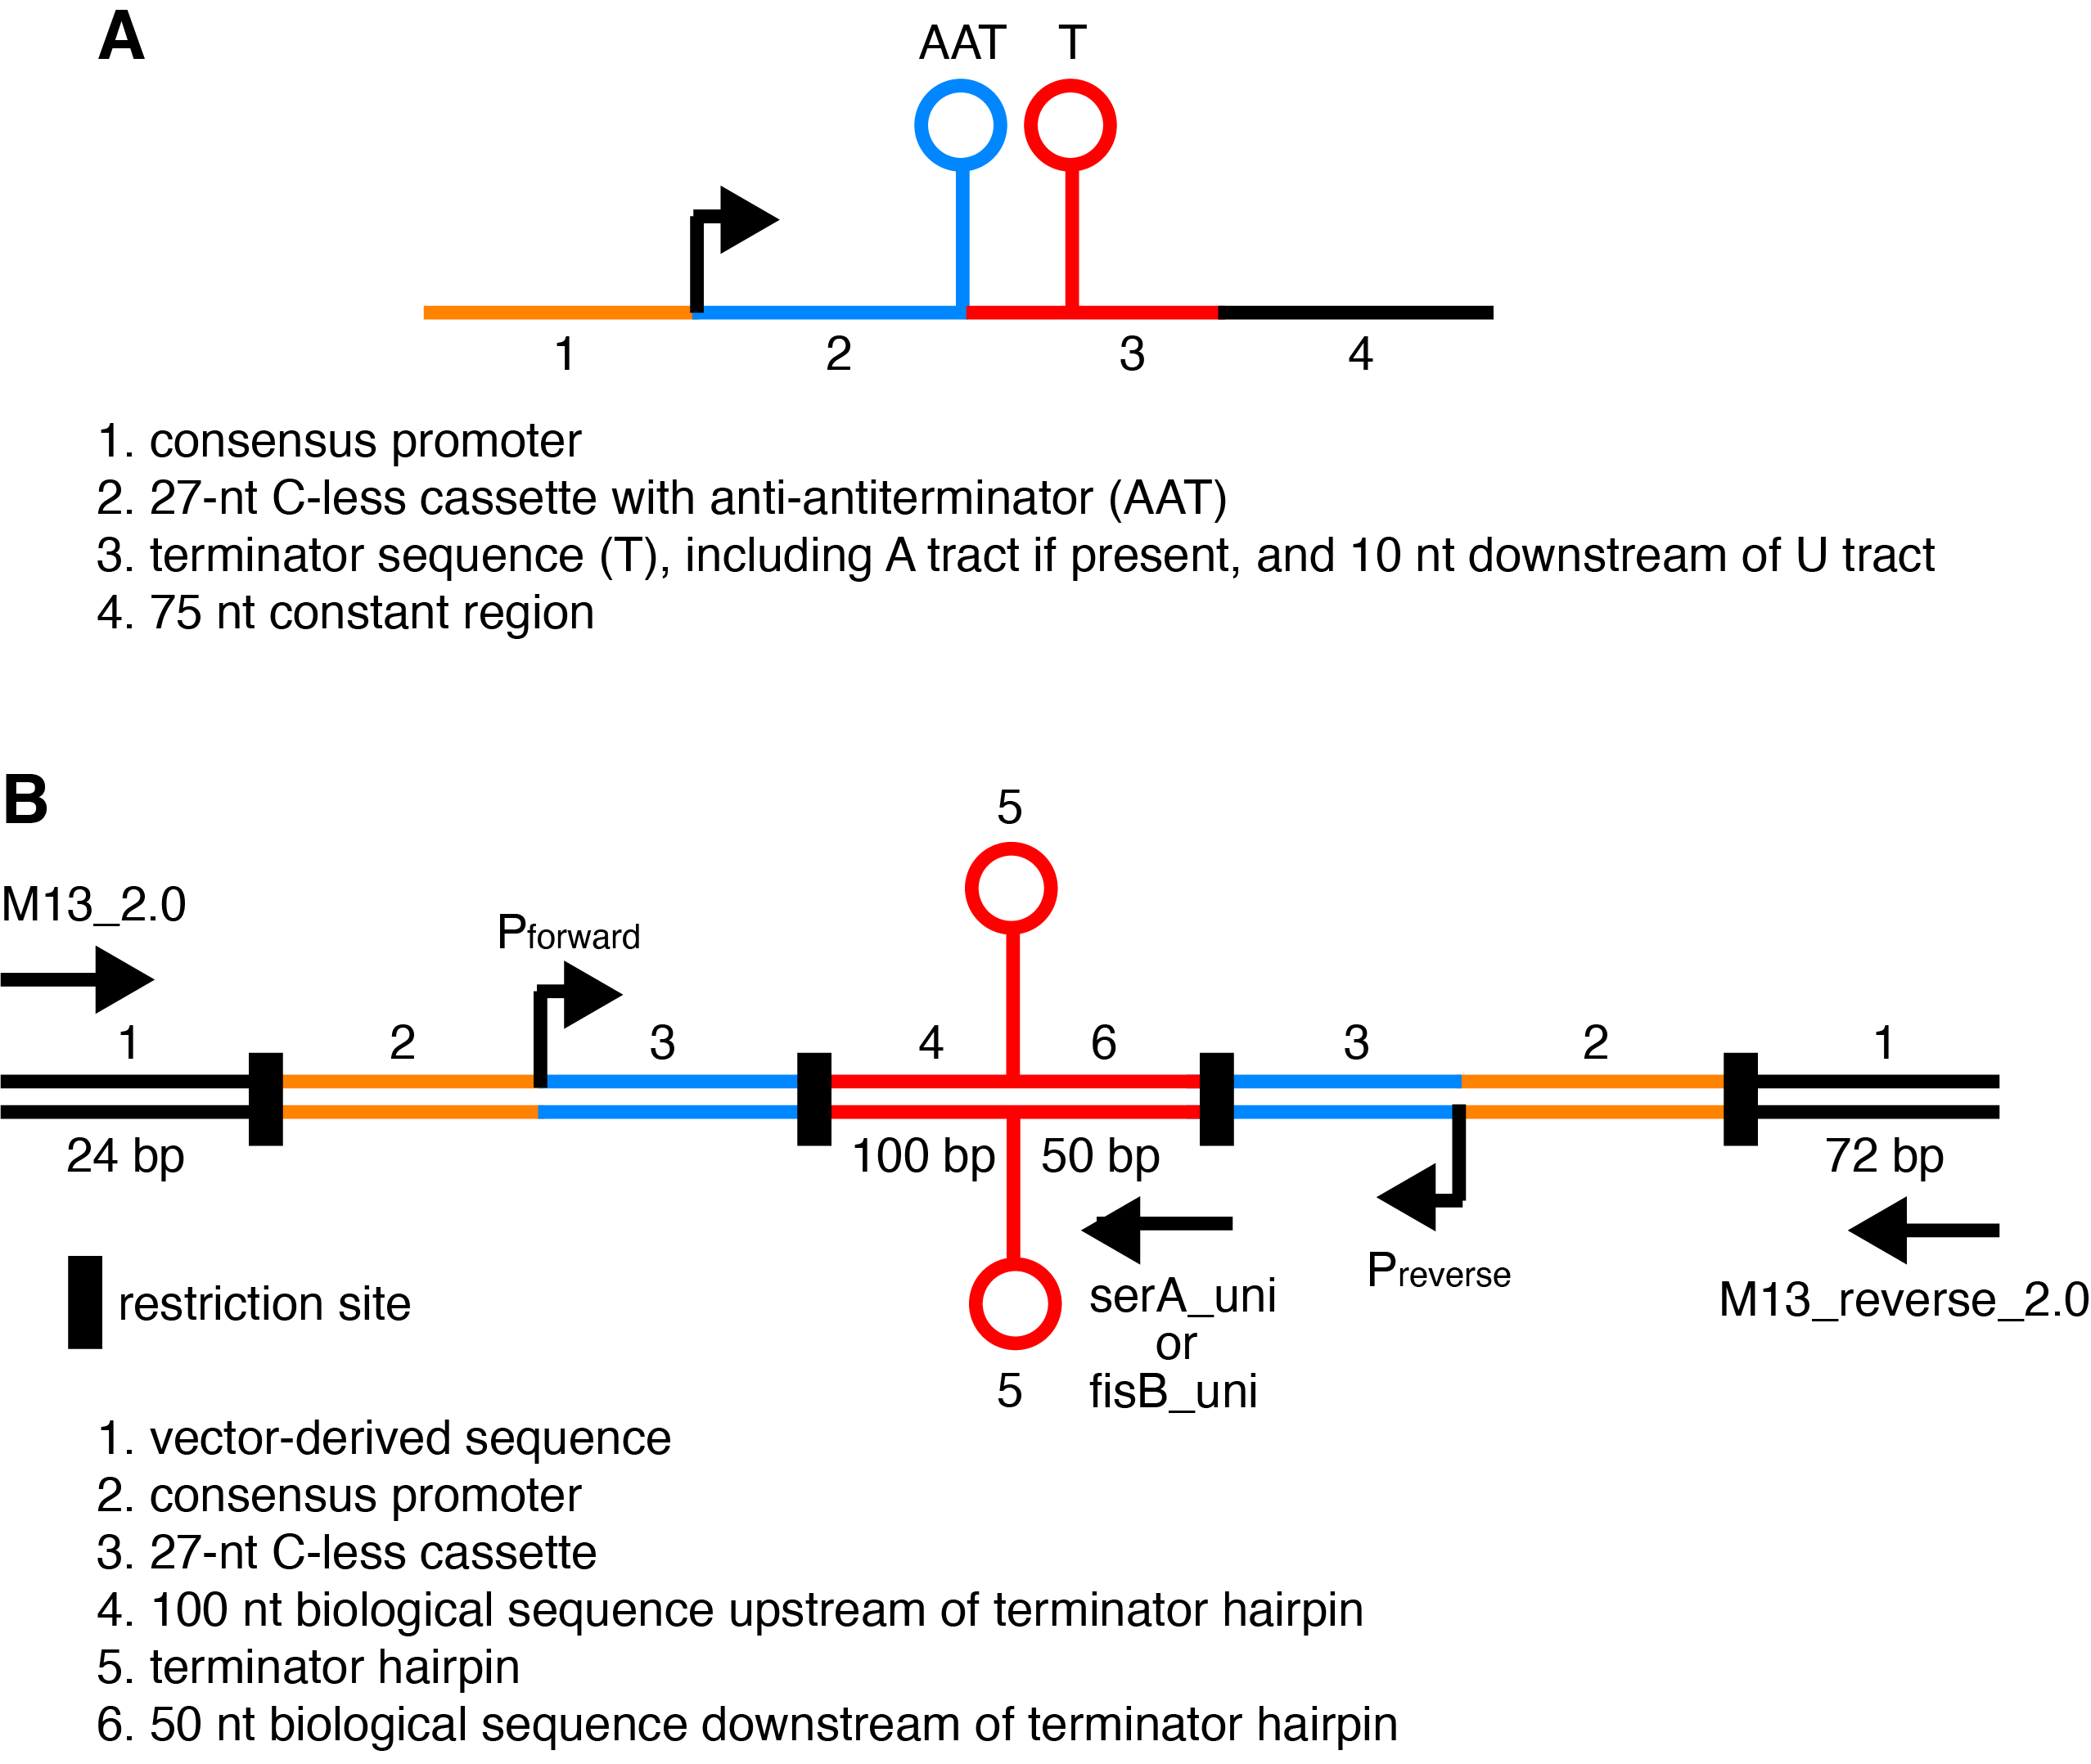

Supplement: supp [file elife-61880-supp-v1.zip › elife_poa_e61880_Figure_2_figure_supplement_1.tif]

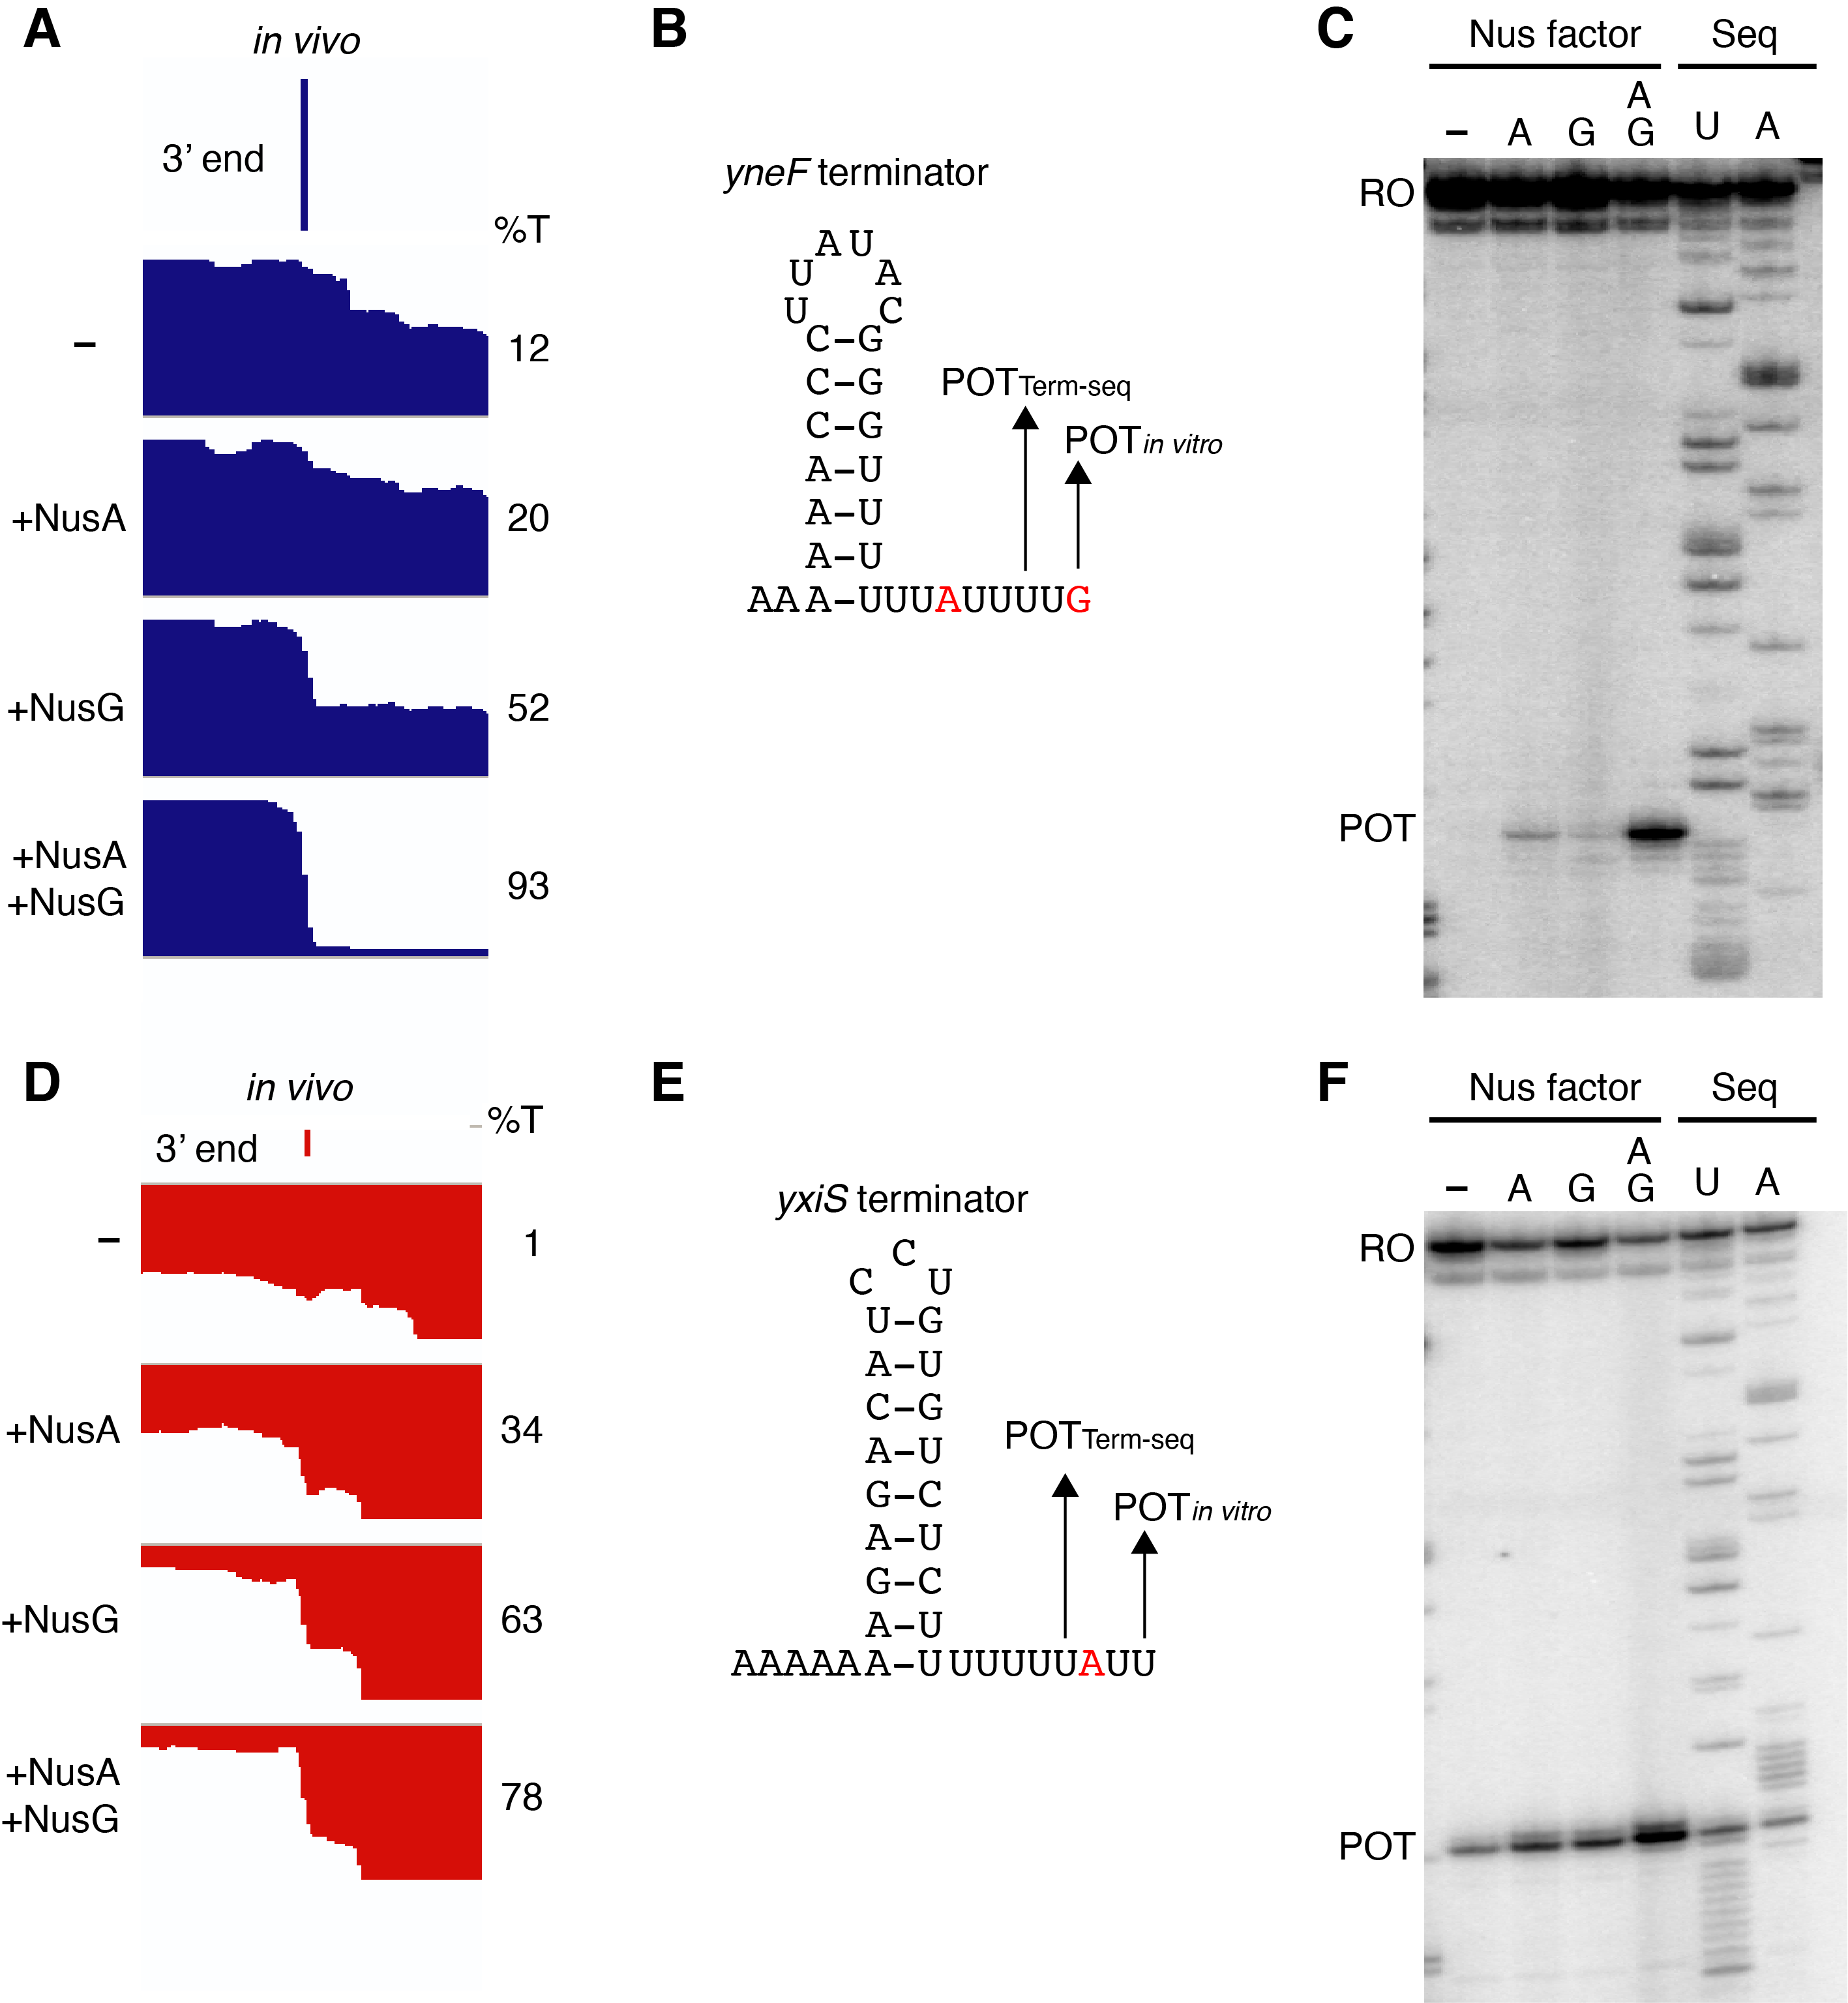

Supplement: supp [file elife-61880-supp-v1.zip › elife_poa_e61880_Figure_4_figure_supplement_1.tif]

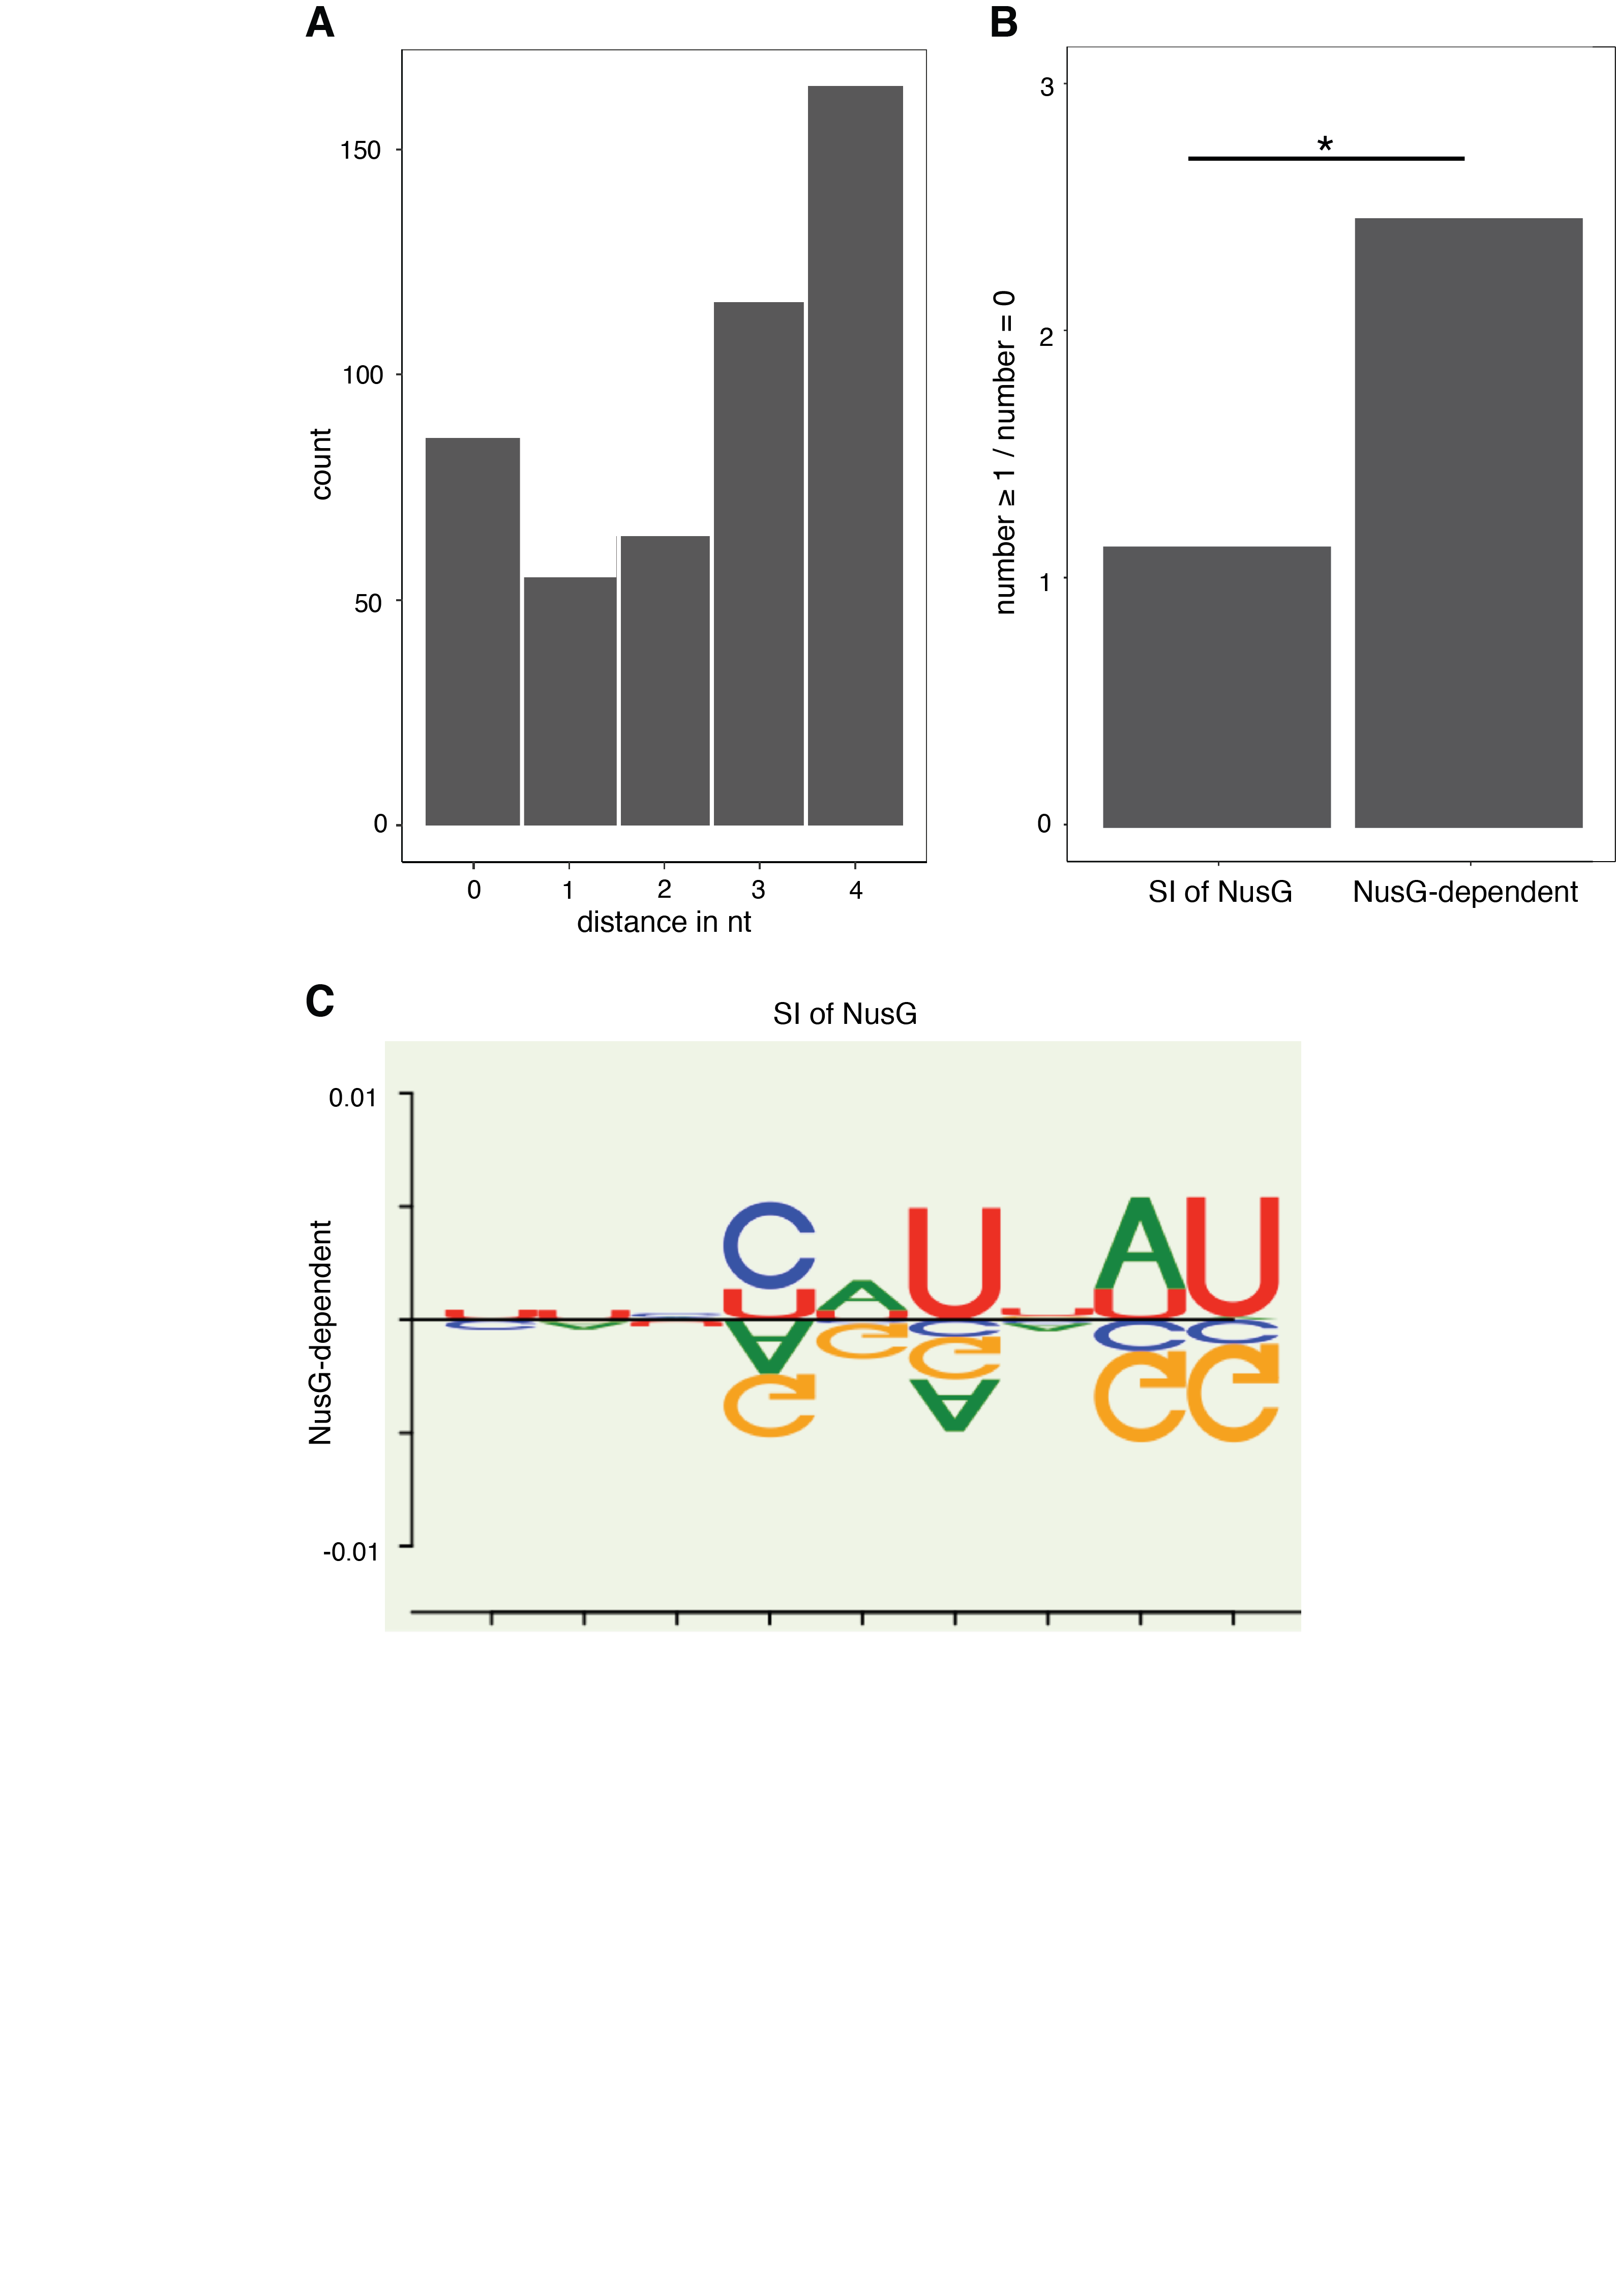

Supplement: supp [file elife-61880-supp-v1.zip › elife_poa_e61880_Figure_4_figure_supplement_2.tif]

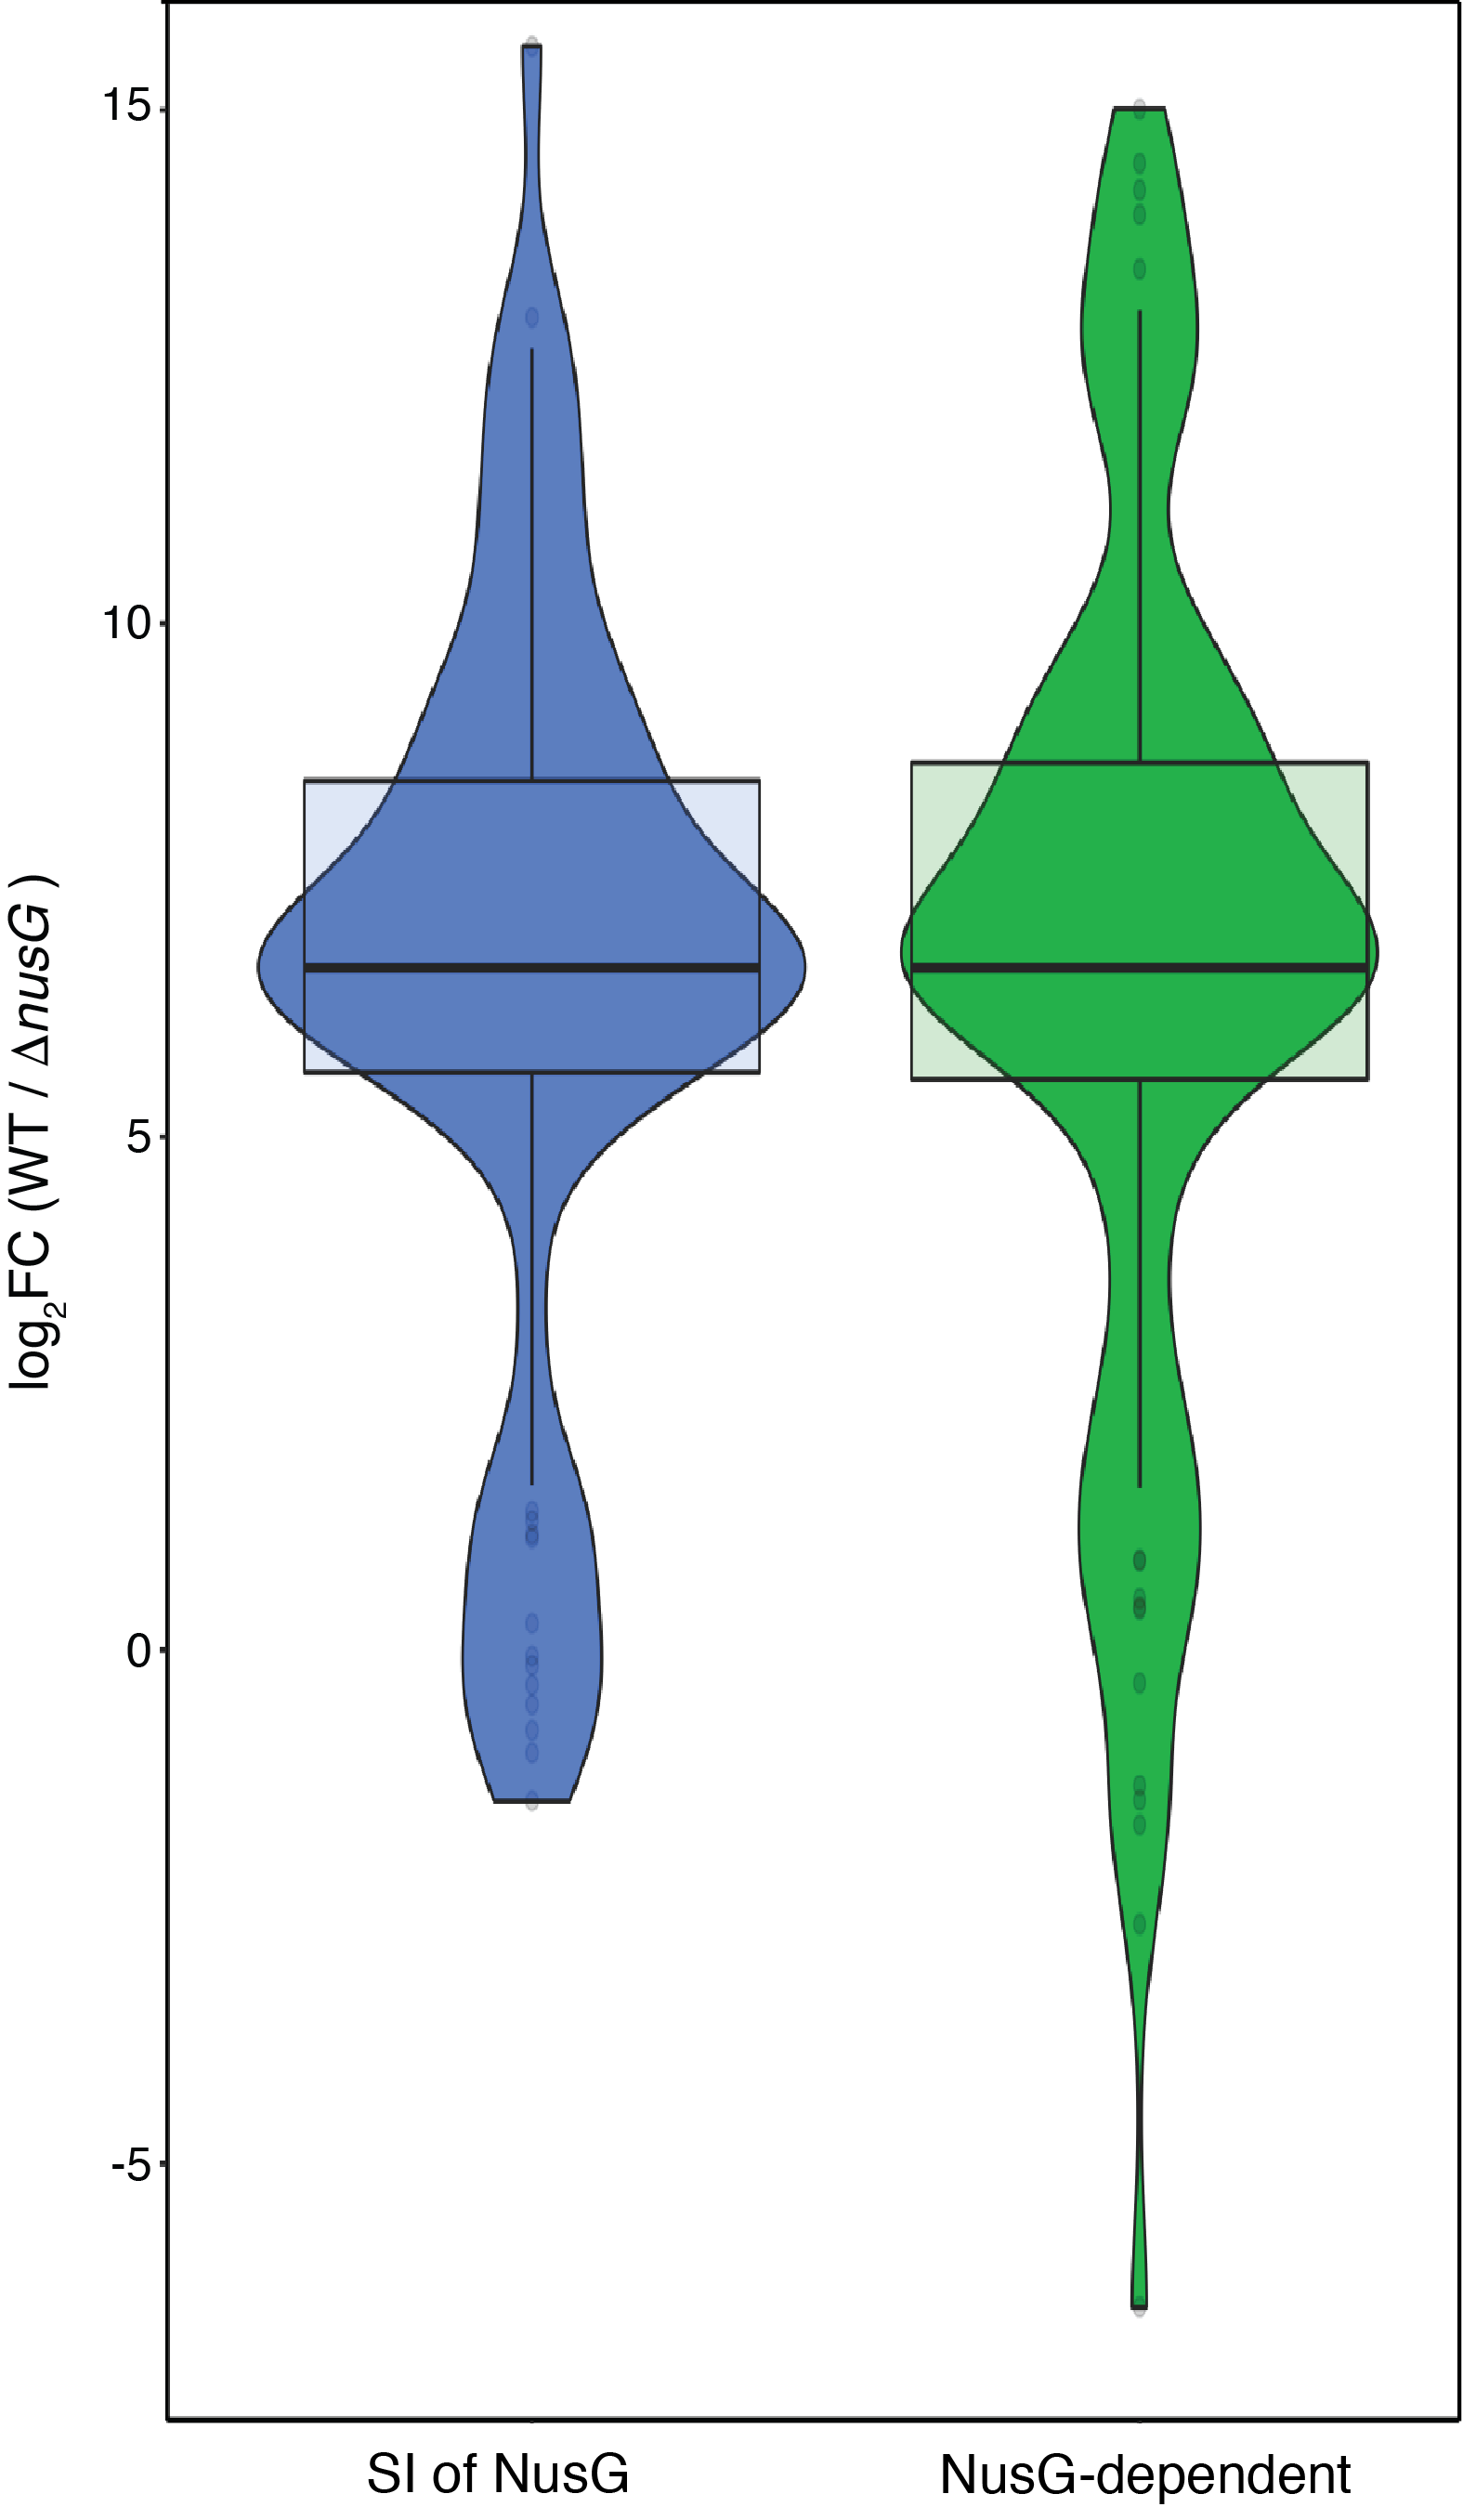

Supplement: supp [file elife-61880-supp-v1.zip › elife_poa_e61880_Figure_4_figure_supplement_3.tif]

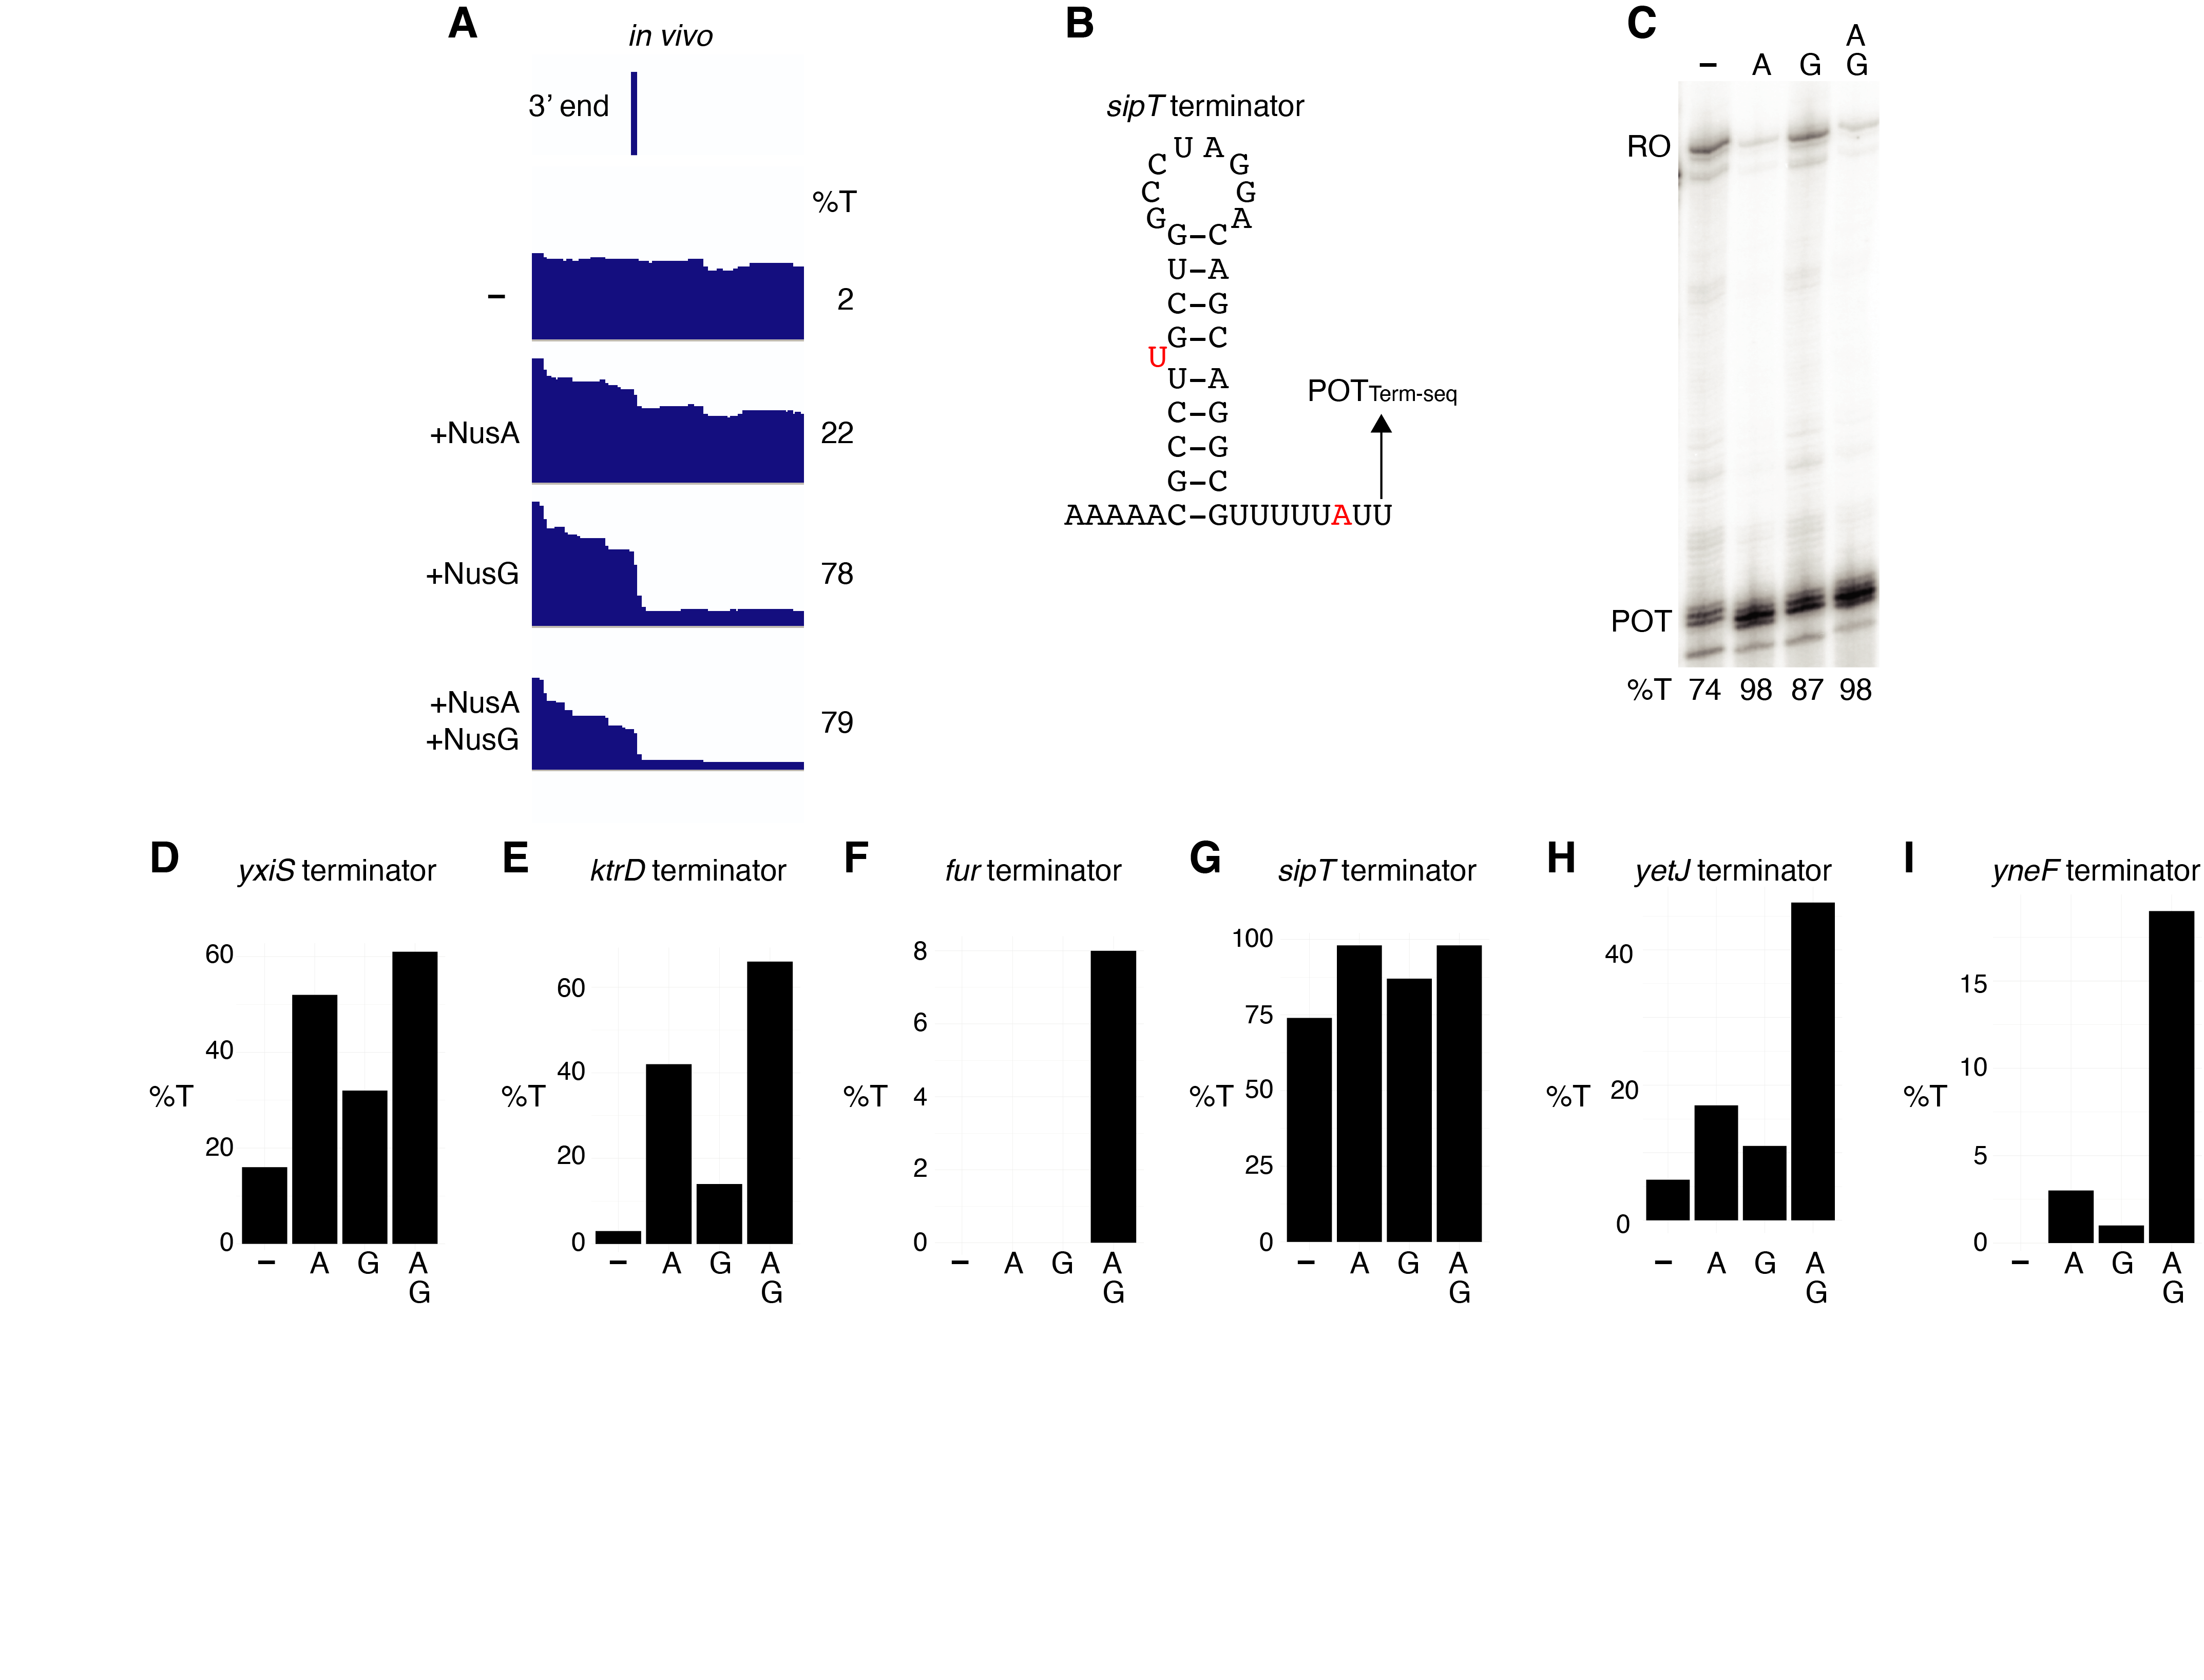

Supplement: supp [file elife-61880-supp-v1.zip › elife_poa_e61880_Figure_4_figure_supplement_4.tif]

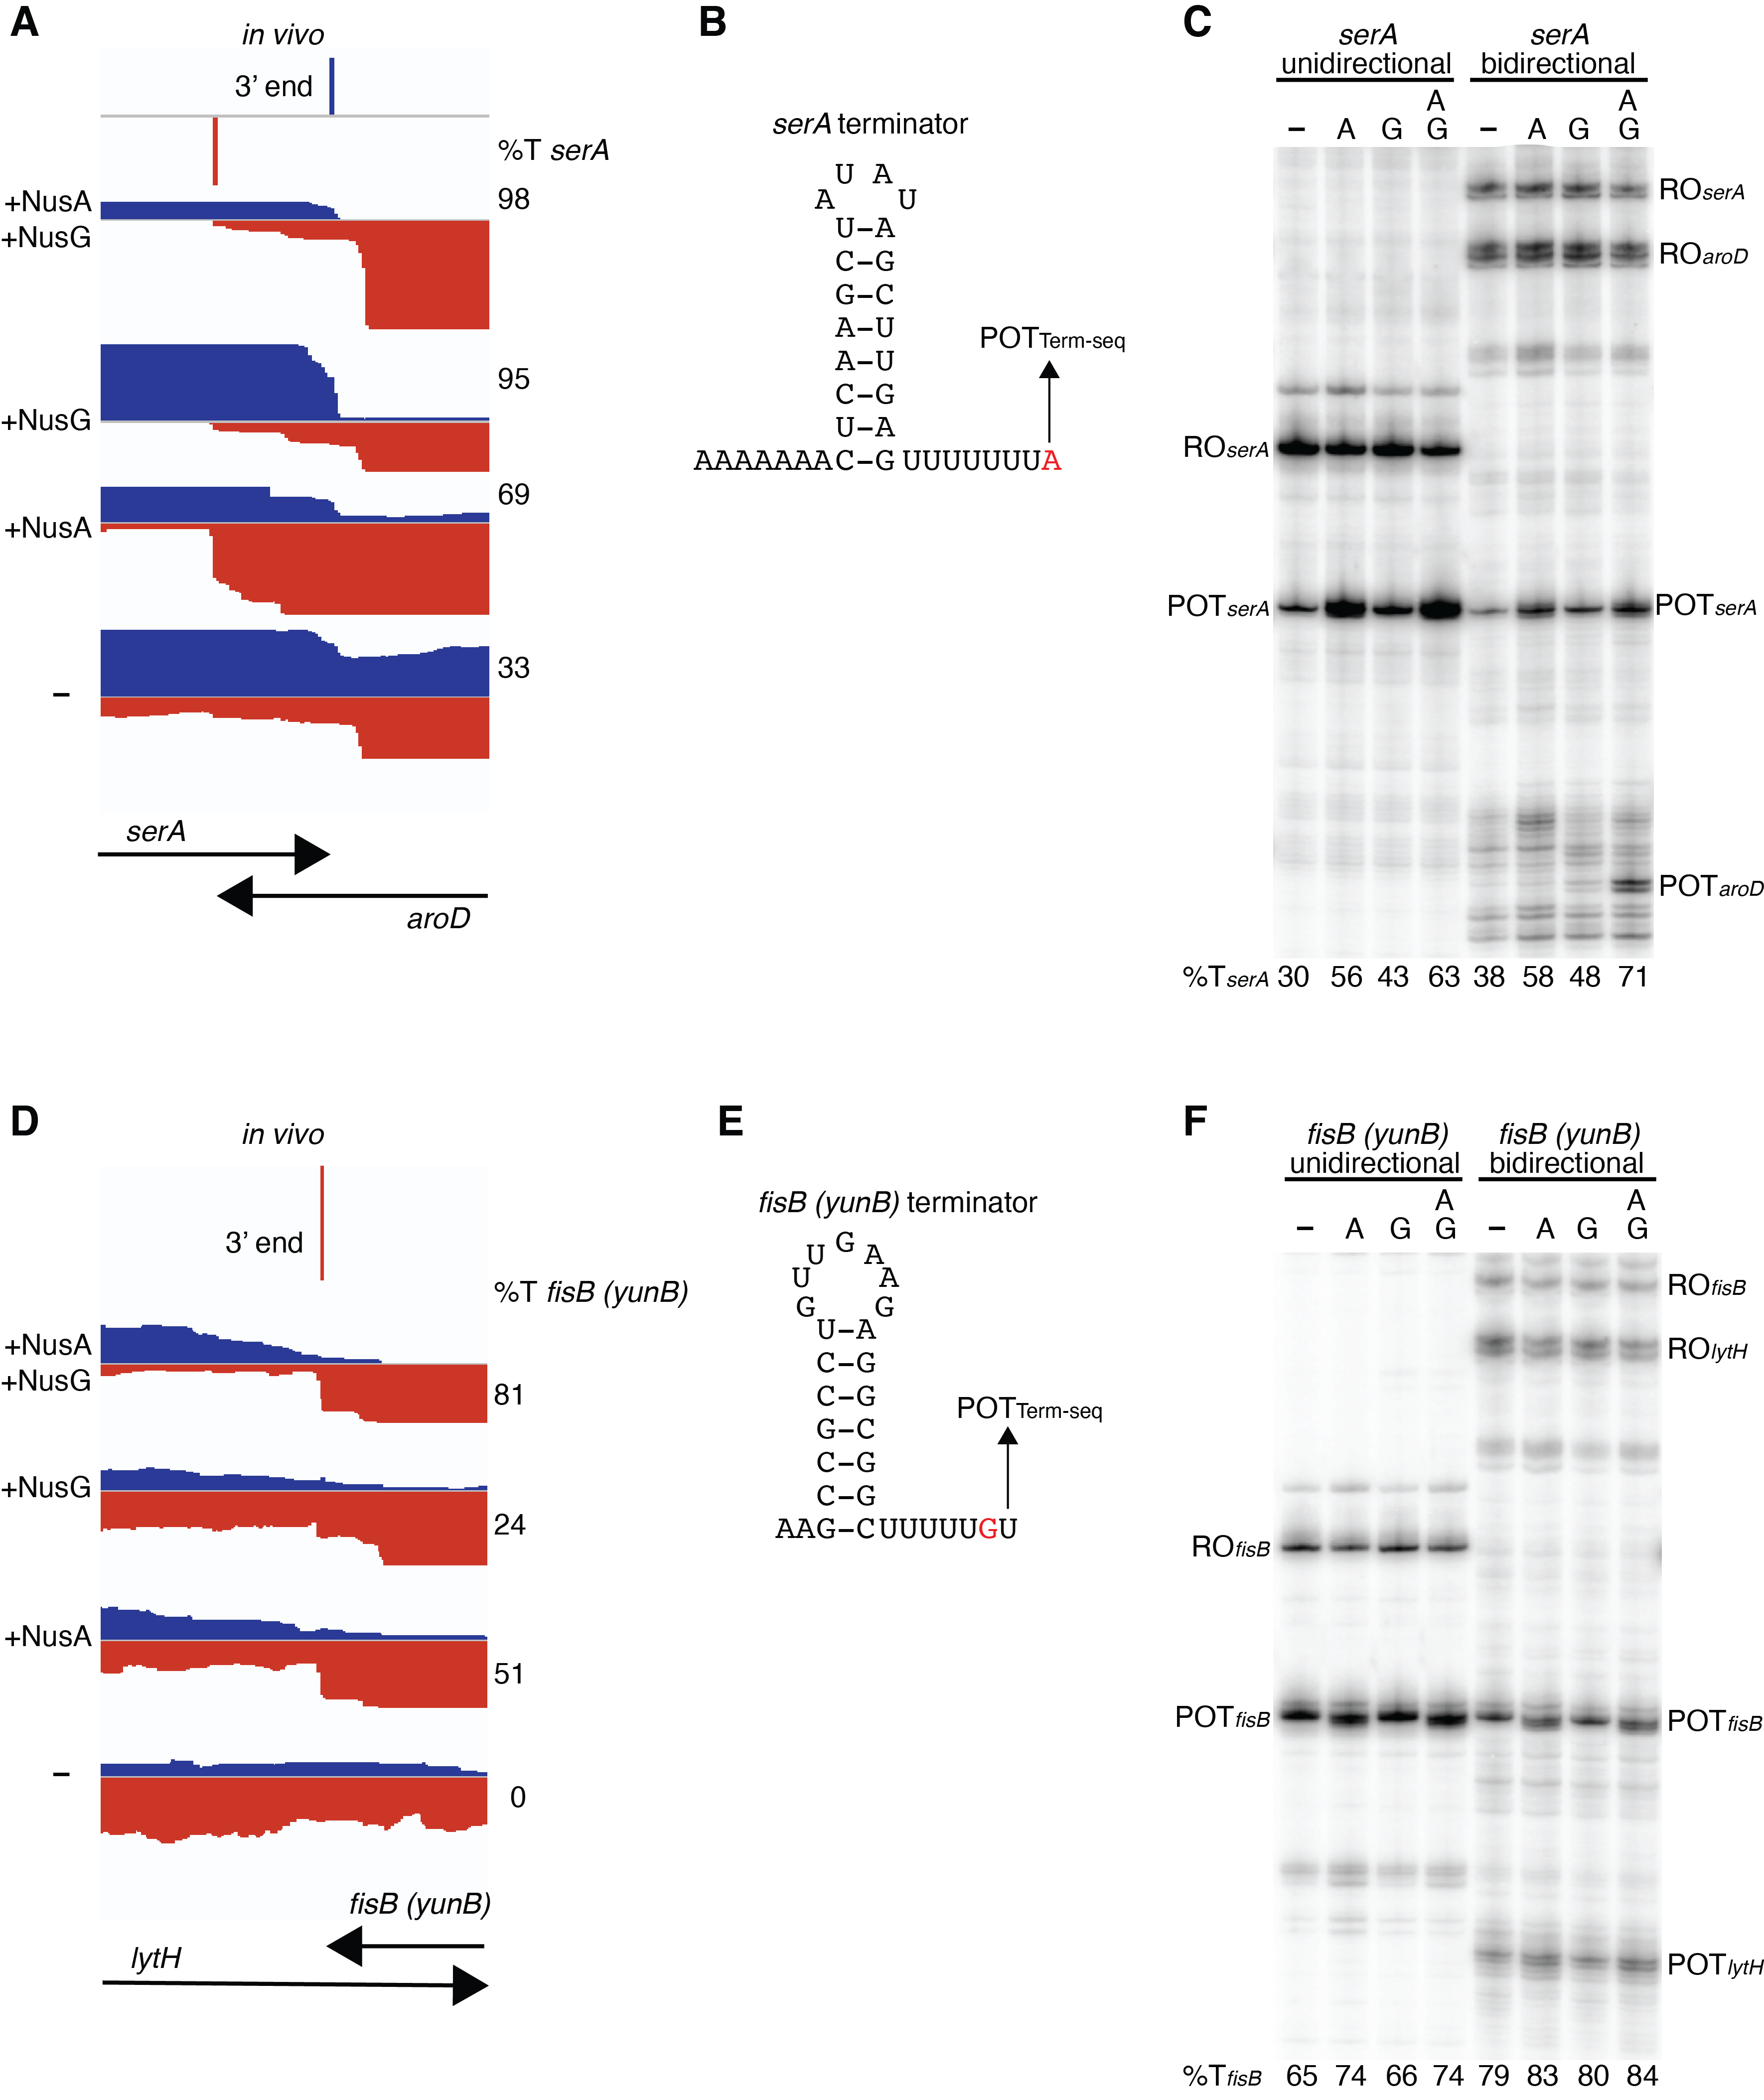

Supplement: supp [file elife-61880-supp-v1.zip › elife_poa_e61880_Figure_4_figure_supplement_5.tif]

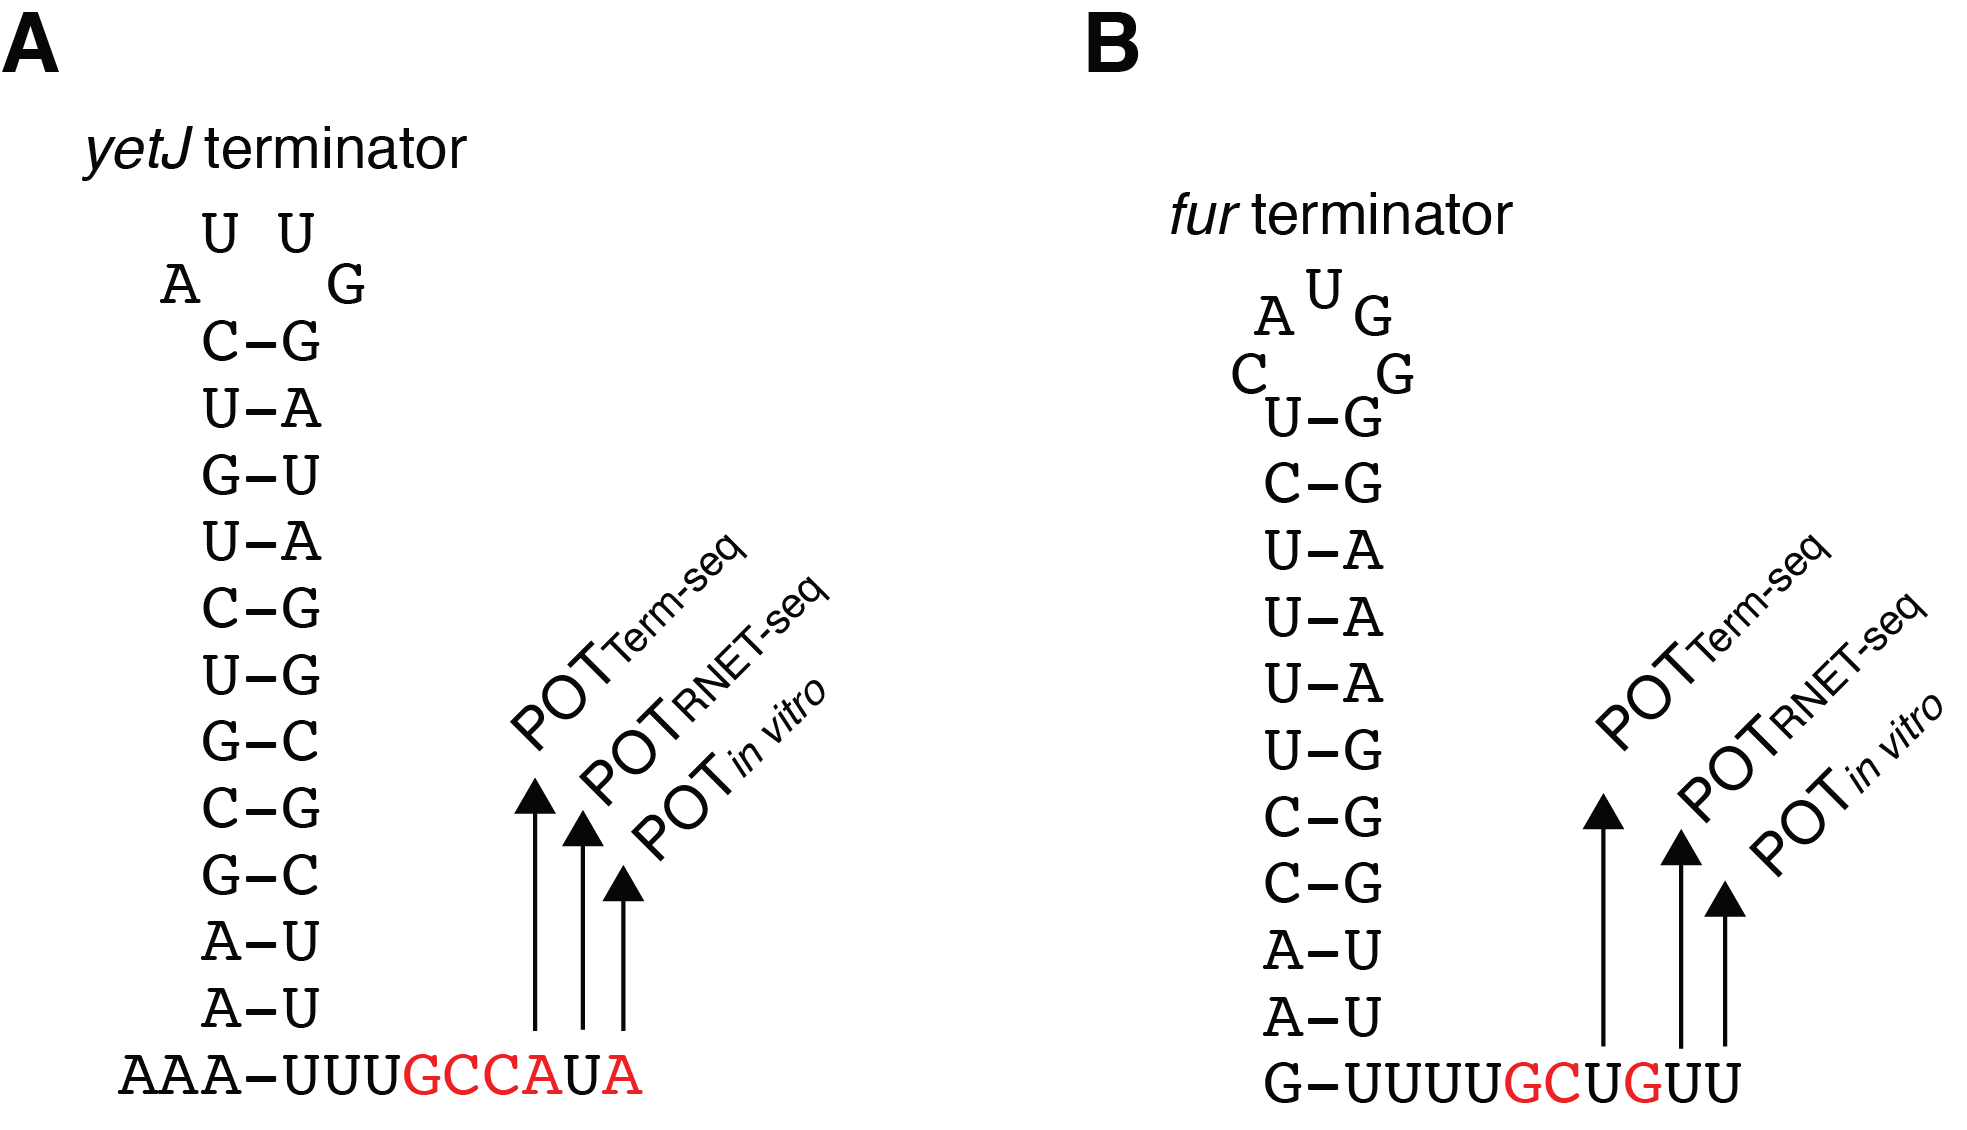

Supplement: supp [file elife-61880-supp-v1.zip › elife_poa_e61880_Figure_4_figure_supplement_6.tif]

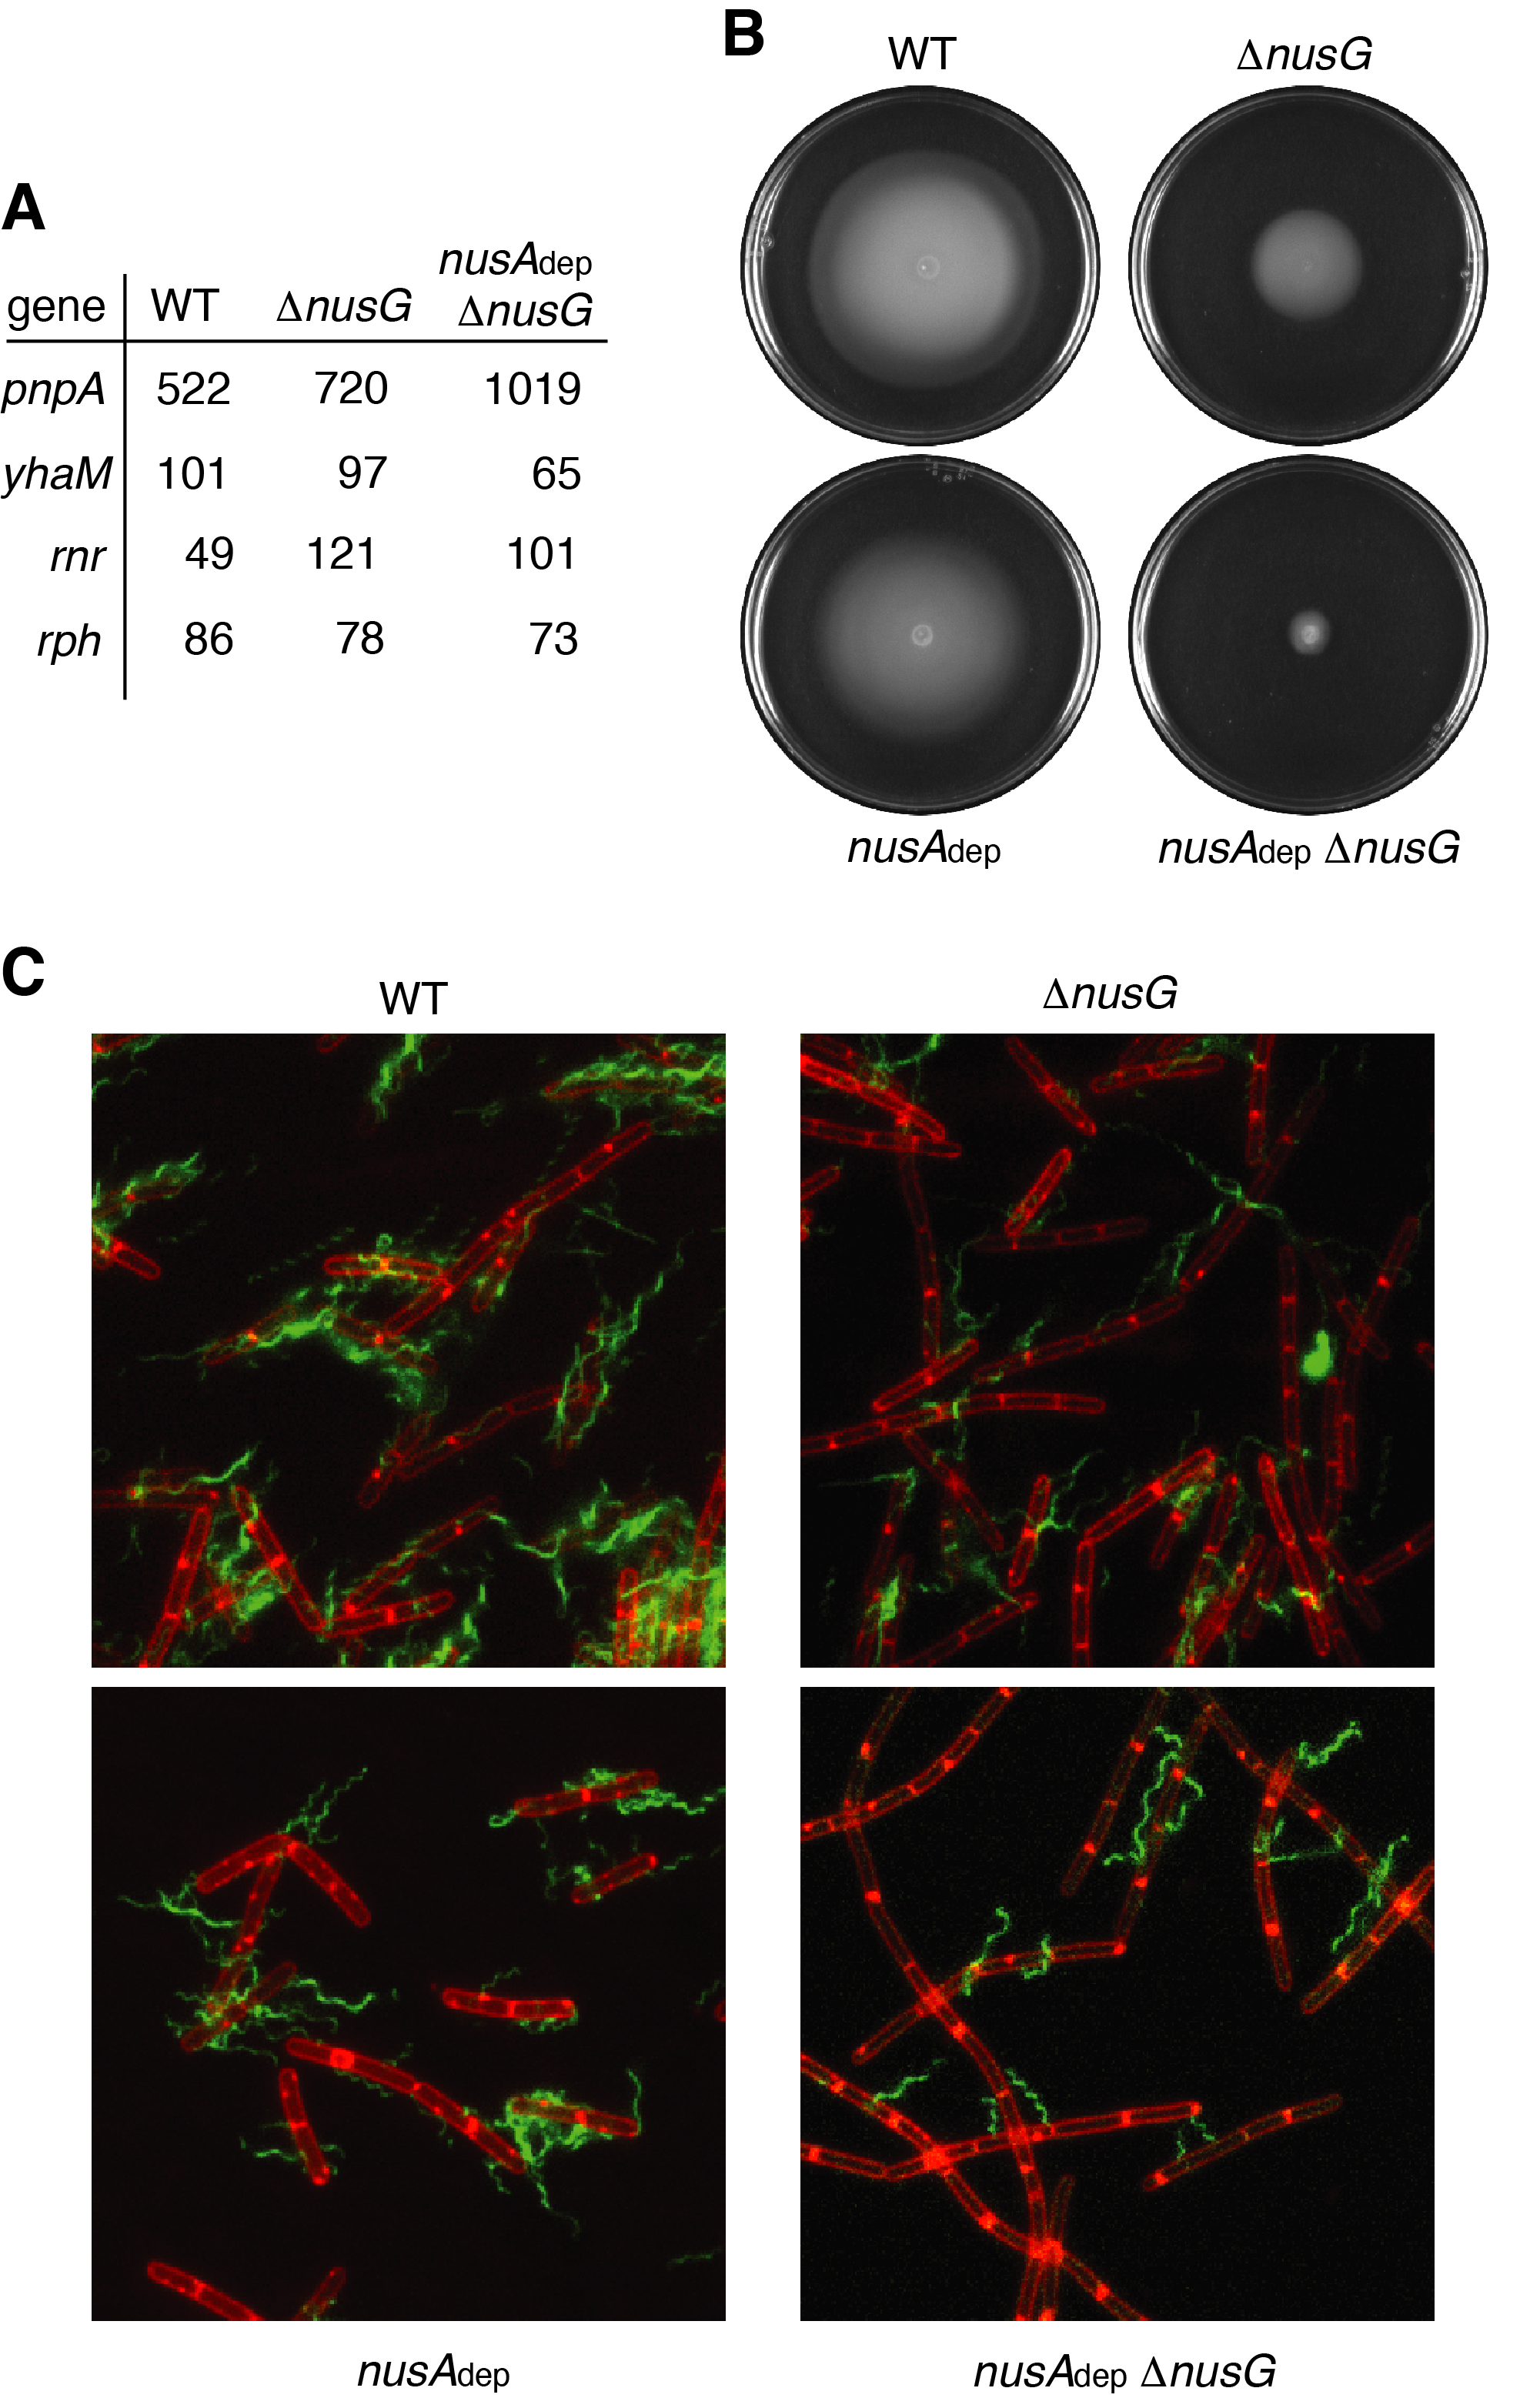

Supplement: supp [file elife-61880-supp-v1.zip › elife_poa_e61880_Figure_7_figure_supplement_1.tif]

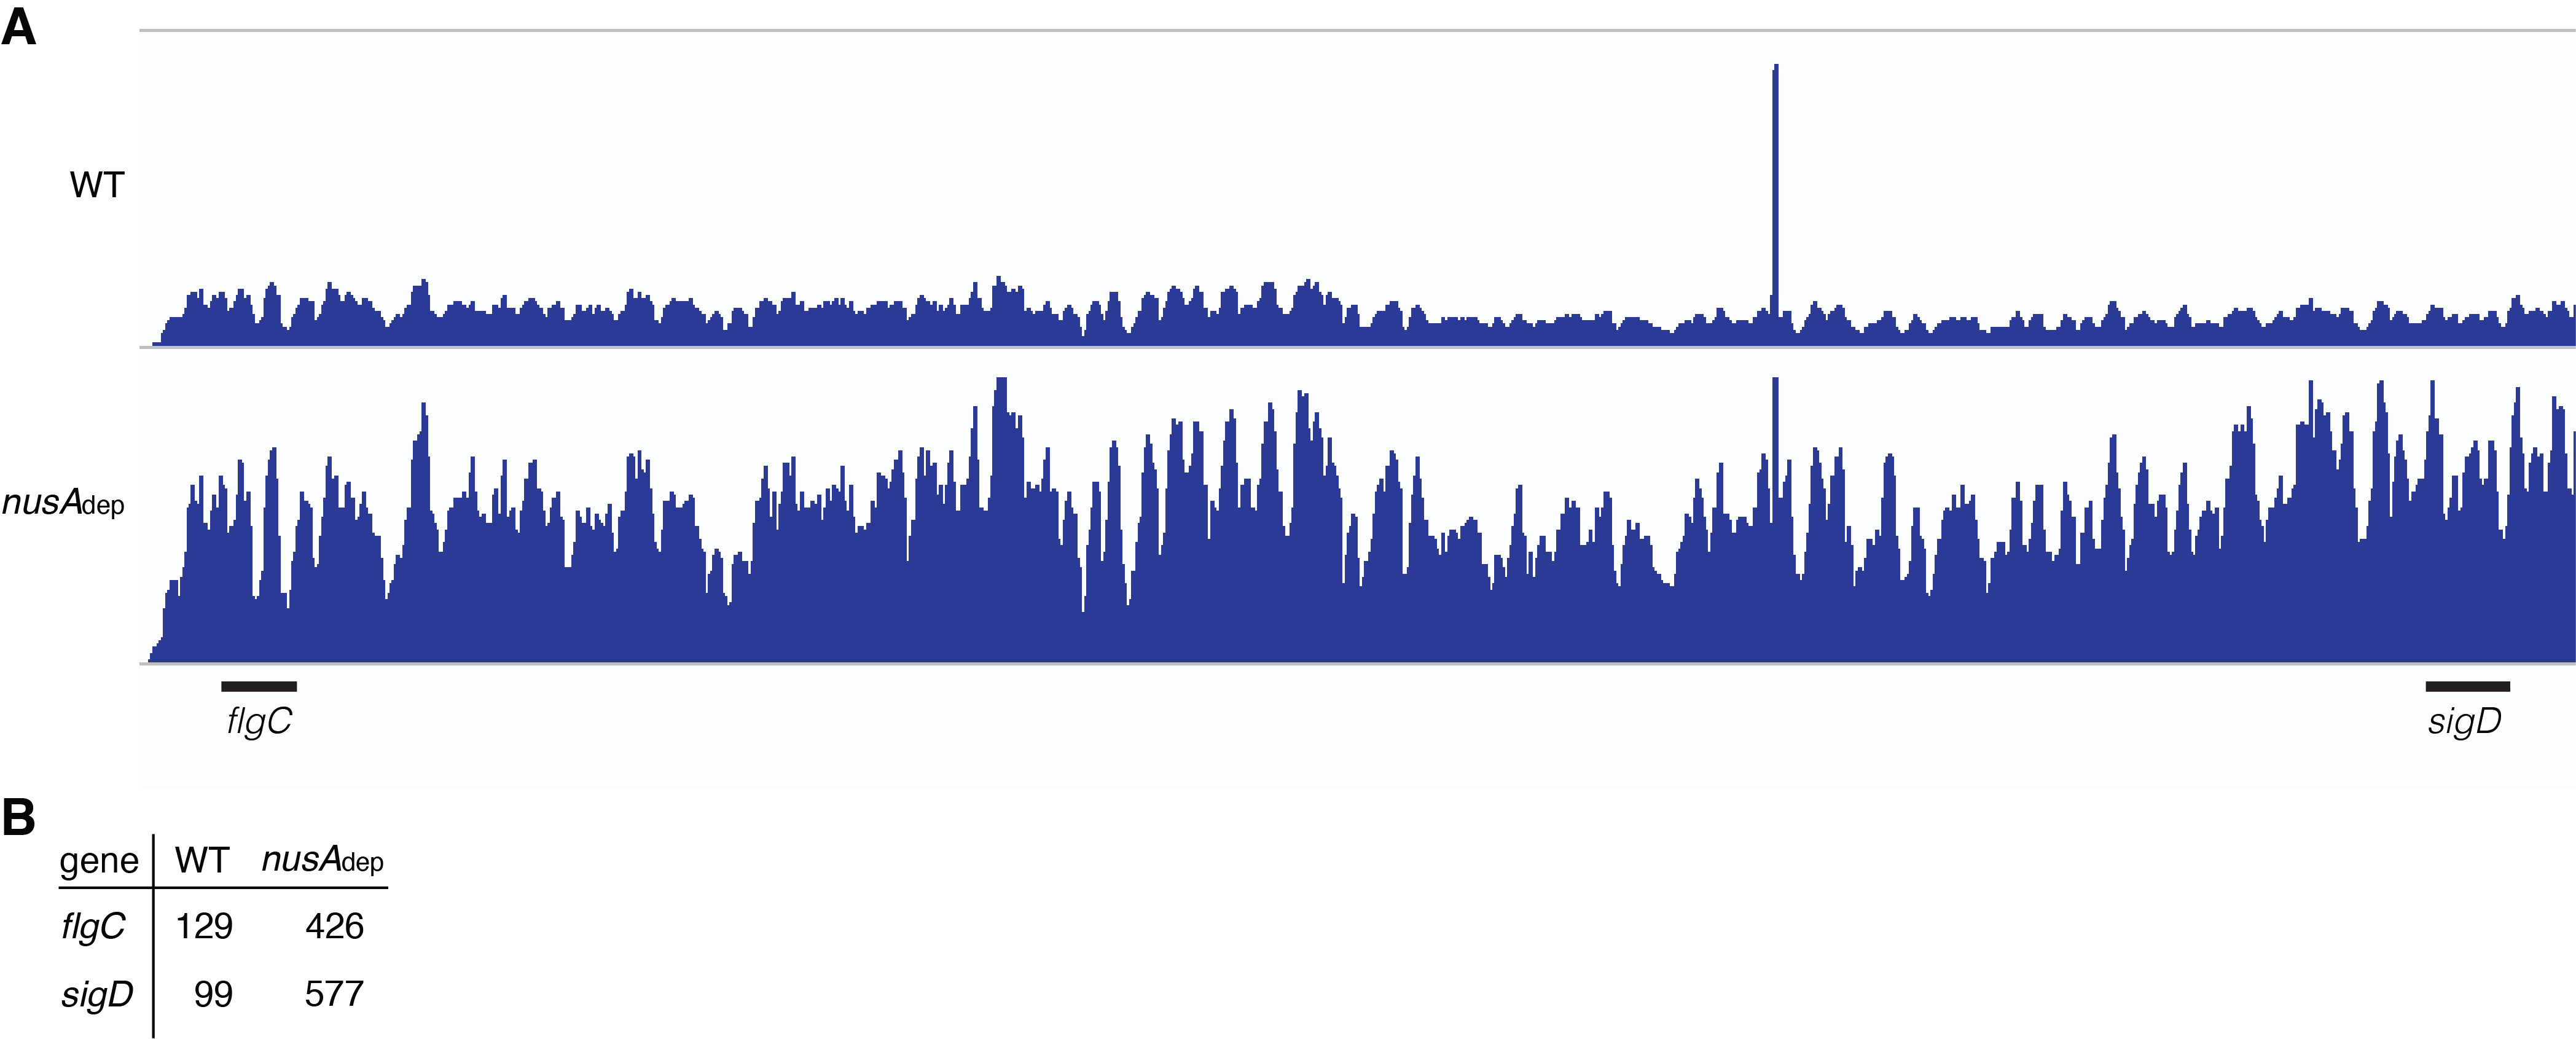

Supplement: supp [file elife-61880-supp-v1.zip › elife_poa_e61880_Figure_7_figure_supplement_2.tif]
